# Supplementary material
Source: PubMed Central journal article supplement (PMC4622541)
Supplement: kepi-10-03-1006497-s002.pdf [file kepi-10-03-1006497-s002.pdf]

| ID | Molecules in Network                                                                                                                                                                                                                                                          | Score | Focus Molecules | Top Diseases and Functions                                                                              |
|----|-------------------------------------------------------------------------------------------------------------------------------------------------------------------------------------------------------------------------------------------------------------------------------|-------|-----------------|---------------------------------------------------------------------------------------------------------|
| 1  | ANK2,CDKN1A,CFB,DMTN,EHD1,EIF2AK2,FGR,FHIT,FOXP1,ICAM1,IFI35,Integrin alpha 5 beta 1,ITGAM, KNG1, KRT34,MAPK1,MEOX1,miR-122-5p (miRNAs w/seed GGAGUGU), NMI, PARP12, PENK, PLAUR, PSME2, RAB32, RARA, RECB, RHOH, SAMHD1, SLC16A5, SLC7A1, TDRD7, TNF, TNFRSF18, TPST1,ZNF318 | 22    | 13              | Cell-To-Cell Signalling and Interaction, Tissue Development, Cellular Function and Maintenance          |
| 2  | AKR1C1/AKR1C2,APP,AQP1,BAX,CAPN15,CCND1,CPED1,DIDO1,DZIP3,ERBB2,FUCA1,GRB2,H2AFY,IFNG,IFNGR2,LTB P3,LTC4S,MAP1LC3B2,MFAP2,MPHOSPH9,MSMB,MTRFR2,MXD3,NF1,NFKB (complex),NRBP1,NUPR1, PACS2, PDLIM4, PMEPA1, PORCN, RUSC2,SCG5, TCF12,TGFB1                                     | 22    | 13              | Cell Death and Survival, Nervous System Development and Function, Cancer                                |
| 3  | AIM1,BAI1,CNN2,CRAF,CTNNB1,DEFA5,DPEP1,EDN3,ERK,EVI2A,F13A1,FOXP3,GAD1,GPR183,GPX2,Histone h3, HNF1A,HOXB5, HSD17B2, ID3, IHH, KSR1, MGAT1, MUC6, NFL3, PAK1, PCCA, RCN1, SATB1, SLC26A2, SPAG11B, TACR3, TCF7,TOB2, TSC22D1                                                  | 20    | 12              | Cancer, Cellular Development, Cellular Growth and Proliferation                                         |
| 4  | AKAP12,CDK14,DAPK1,DCHS1,DHCR7,DHRS2,DICER1,estrogen receptor,FDXR,FLNC,HOXB2,KAT8,KRT15,Lh, MAPK4,MAPK12,MET,miR-130a-3p (and other miRNAs w/seed AGUGCAA),NCAPD3,NCAPG2,NCAPH2,PAK3, PNOOC,PRODH,PTP4A1,RAB5C,SH3BP4,SHISA5,SMAD4,SMC2,SMC4,SPARC,SPSB1,TAGLN2,TP53         | 17    | 11              | DNA Replication, Recombination, and Repair, Cell Cycle, Cellular Assembly and Organization              |
| 5  | FGF11,RBPJ                                                                                                                                                                                                                                                                    | 2     | 1               | Cardiovascular System Development and Function, Cellular Development, Cellular Function and Maintenance |
| 6  | FOXL2,OSR2                                                                                                                                                                                                                                                                    | 2     | 1               | Tissue Morphology, Cancer, Cellular Development                                                         |
| 7  | ADRA1A,ADRA1B                                                                                                                                                                                                                                                                 | 2     | 1               | Neurological Disease, Organismal Injury and Abnormalities, Renal and Urological Disease                 |
| 8  | KLC1,SYTL3                                                                                                                                                                                                                                                                    | 2     | 1               | Cellular Assembly and Organization, Neurological Disease, Cell Morphology                               |
| 9  | CDO1,HIC1                                                                                                                                                                                                                                                                     | 2     | 1               | Amino Acid Metabolism, Small Molecule Biochemistry, Organ Development                                   |

#### Top Diseases and Bio Functions

#### Diseases and Disorders

| Name                   | p-value             | # Molecules |
|------------------------|---------------------|-------------|
| Developmental Disorder | 1.47E-03 - 4.36E-02 | 12          |
| Neurological Disease   | 1.47E-03 - 4.36E-02 | 22          |
| Cancer                 | 1.57E-03 - 4.78E-02 | 26          |
| Hematological Disease  | 2.80E-03 - 3.11E-02 | 13          |
| Immunological Disease  | 2.80E-03 - 3.50E-02 | 8           |

#### Molecular and Cellular Functions

| Name                                   | p-value             | # Molecules |
|----------------------------------------|---------------------|-------------|
| Cell Death and Survival                | 1.83E-03 - 4.78E-02 | 18          |
| Cell Morphology                        | 3.18E-03 - 4.01E-02 | 7           |
| Cell-To-Cell Signaling and Interaction | 3.88E-03 - 4.78E-02 | 9           |
| Cellular Assembly and Organization     | 3.88E-03 - 4.75E-02 | 8           |
| Amino Acid Metabolism                  | 4.45E-03 - 1.33E-02 | 1           |

#### Physiological System Development and Function

| Name                                                    | p-value             | # Molecules |
|---------------------------------------------------------|---------------------|-------------|
| Tissue Development                                      | 3.88E-03 - 3.93E-02 | 9           |
| Auditory and Vestibular System Development and Function | 4.45E-03 - 4.45E-03 | 1           |
| Cell-mediated Immune Response                           | 4.45E-03 - 4.45E-03 | 1           |
| Embryonic Development                                   | 4.45E-03 - 3.93E-02 | 3           |
| Endocrine System Development and Function               | 4.45E-03 - 3.07E-02 | 1           |
