# Supplementary material
Source: PubMed Central journal article supplement (PMC4622541)
Supplement: kepi-10-03-1006497-s003.pdf [file kepi-10-03-1006497-s003.pdf]

| ID         | Chromosome | CGI.Relation | Average $\beta$ -value<br>in chordomas | Average $\beta$ -values<br>in controls | Delta<br>$\beta$ -value | FDR      |
|------------|------------|--------------|----------------------------------------|----------------------------------------|-------------------------|----------|
| cg09993145 | chr1       | Open Sea     | 0.232682837                            | 0.553826863                            | 0.32114403              | 0.000189 |
| cg04308687 | chr1       | Open Sea     | 0.169347662                            | 0.509492064                            | 0.3401444               | 0.005367 |
| cg03471346 | chr1       | Open Sea     | 0.240694051                            | 0.657775733                            | 0.41708168              | 0.041406 |
| cg13844463 | chr11      | North Shelf  | 0.198640373                            | 0.596155557                            | 0.39751518              | 0.002321 |
| cg08261450 | chr12      | North Shelf  | 0.192026715                            | 0.601232192                            | 0.40920548              | 0.005869 |
| cg22851485 | chr12      | South Shore  | 0.213185257                            | 0.517580826                            | 0.30439557              | 0.007974 |
| cg01919701 | chr13      | North Shore  | 0.20424906                             | 0.540999051                            | 0.33674999              | 0.000979 |
| cg04784410 | chr14      | Open Sea     | 0.229068021                            | 0.534313351                            | 0.30524533              | 0.00265  |
| cg08011255 | chr17      | South Shore  | 0.249461103                            | 0.538469754                            | 0.28900865              | 0.037787 |
| cg26250400 | chr19      | South Shelf  | 0.247703831                            | 0.515619048                            | 0.26791522              | 0.019666 |
| cg19521693 | chr19      | South Shore  | 0.227526858                            | 0.500173777                            | 0.27264692              | 0.036559 |
| cg11902863 | chr2       | Open Sea     | 0.208552887                            | 0.568203901                            | 0.35965101              | 2.74E-05 |
| cg06625640 | chr2       | North Shelf  | 0.24879019                             | 0.517386233                            | 0.26859604              | 0.005323 |
| cg11009736 | chr2       | Open Sea     | 0.16500247                             | 0.552529925                            | 0.38752746              | 0.01569  |
| cg10966876 | chr2       | Island       | 0.237442181                            | 0.515655804                            | 0.27821362              | 0.032577 |
| cg02734358 | chr4       | North Shore  | 0.203050649                            | 0.717927199                            | 0.51487655              | 5.71E-11 |
| cg09317128 | chr4       | South Shelf  | 0.249636125                            | 0.588609464                            | 0.33897334              | 0.003803 |
| cg06728135 | chr5       | Open Sea     | 0.225536057                            | 0.50483885                             | 0.27930279              | 0.0095   |
| cg13275603 | chr5       | Open Sea     | 0.151717345                            | 0.556506369                            | 0.40478902              | 0.027726 |
| cg25636466 | chr6       | North Shelf  | 0.226947847                            | 0.55311434                             | 0.32616649              | 1.09E-06 |
| cg24574793 | chr6       | Open Sea     | 0.222873868                            | 0.53726111                             | 0.31438724              | 1.82E-06 |
| cg16275882 | chr7       | South Shore  | 0.1442283                              | 0.564121078                            | 0.41989278              | 0.001395 |
| cg22786667 | chr7       | Open Sea     | 0.18622921                             | 0.516581312                            | 0.3303521               | 0.03008  |
| cg20321319 | chr8       | South Shore  | 0.237828223                            | 0.594951219                            | 0.357123                | 8.37E-08 |
| cg23298114 | chr8       | Open Sea     | 0.214911661                            | 0.719115379                            | 0.50420372              | 0.00264  |
| cg25261151 | chr8       | South Shore  | 0.234500791                            | 0.520758171                            | 0.28625738              | 0.012061 |
| cg01651915 | chr8       | Open Sea     | 0.135367297                            | 0.521869889                            | 0.38650259              | 0.015734 |
| cg20513418 | chr8       | South Shore  | 0.212894209                            | 0.661331438                            | 0.44843723              | 0.030853 |
| cg07962315 | chr9       | South Shore  | 0.176903481                            | 0.519944004                            | 0.34304052              | 0.032755 |
