# Supplementary material
Source: PubMed Central journal article supplement (PMC4622541)
Supplement: kepi-10-03-1006497-s004.pdf [file kepi-10-03-1006497-s004.pdf]

| ID         | Chromosome | CGI.Relation | Average $\beta$ -values<br>in chordomas | Average $\beta$ -values<br>in Controls | Delta<br>$\beta$ -values | FDR      |
|------------|------------|--------------|-----------------------------------------|----------------------------------------|--------------------------|----------|
| cg16140253 | chr1       | South Shelf  | 0.59991419                              | 0.220631983                            | -0.3792822               | 6.99E-06 |
| cg20253872 | chr1       | South Shelf  | 0.664091196                             | 0.231366145                            | -0.4327251               | 0.037943 |
| cg13556548 | chr1       | South Shore  | 0.632234136                             | 0.1985278                              | -0.4337063               | 0.022597 |
| cg02396224 | chr1       | Island       | 0.525070687                             | 0.134050212                            | -0.3910205               | 2.56E-07 |
| cg25007705 | chr1       | Open Sea     | 0.58135295                              | 0.242795693                            | -0.3385573               | 3.32E-05 |
| cg14181576 | chr1       | Island       | 0.506483984                             | 0.07817242                             | -0.4283116               | 6.71E-10 |
| cg13448978 | chr1       | Island       | 0.567771446                             | 0.163699437                            | -0.404072                | 1.1E-07  |
| cg09370867 | chr1       | Island       | 0.577308974                             | 0.198924835                            | -0.3783841               | 2.57E-09 |
| cg22851420 | chr1       | Island       | 0.539036884                             | 0.082290468                            | -0.4567464               | 0.000201 |
| cg09858862 | chr1       | South Shore  | 0.520560443                             | 0.219872753                            | -0.3006877               | 0.002438 |
| cg00279406 | chr1       | Island       | 0.508213255                             | 0.232820944                            | -0.2753923               | 1.9E-06  |
| cg12587954 | chr1       | South Shore  | 0.524024699                             | 0.192070864                            | -0.3319538               | 0.001128 |
| cg10055231 | chr1       | North Shelf  | 0.701823827                             | 0.184109691                            | -0.5177141               | 0.000205 |
| cg12690996 | chr1       | North Shore  | 0.547249223                             | 0.129691429                            | -0.4175578               | 0.044553 |
| cg09317884 | chr1       | Island       | 0.557198472                             | 0.126973209                            | -0.4302253               | 0.004297 |
| cg22159815 | chr1       | Open Sea     | 0.725046911                             | 0.246555406                            | -0.4784915               | 0.001622 |
| cg10572465 | chr1       | Open Sea     | 0.507079427                             | 0.145861595                            | -0.3612178               | 0.000689 |
| cg15731815 | chr1       | Island       | 0.548232246                             | 0.080103101                            | -0.4681291               | 2.93E-06 |
| cg00030047 | chr1       | North Shore  | 0.609681645                             | 0.213499359                            | -0.3961823               | 0.017322 |
| cg26363759 | chr1       | Open Sea     | 0.631029229                             | 0.204696835                            | -0.4263324               | 3.76E-05 |
| cg18398753 | chr1       | Open Sea     | 0.569389385                             | 0.175982838                            | -0.3934065               | 0.041322 |
| cg22339338 | chr1       | North Shelf  | 0.584862152                             | 0.246089346                            | -0.3387728               | 0.035974 |
| cg06851000 | chr1       | South Shore  | 0.543594129                             | 0.15939915                             | -0.384195                | 0.002473 |
| cg06829686 | chr1       | Island       | 0.573680038                             | 0.103047706                            | -0.4706323               | 1.6E-10  |
| cg24315421 | chr1       | North Shore  | 0.561444341                             | 0.073487976                            | -0.4879564               | 2.11E-09 |
| cg10061129 | chr1       | Open Sea     | 0.61943762                              | 0.212802431                            | -0.4066352               | 3.43E-09 |
| cg03538430 | chr1       | Island       | 0.506776813                             | 0.162452066                            | -0.3443247               | 1.77E-08 |
| cg13209762 | chr1       | Open Sea     | 0.509354455                             | 0.236223933                            | -0.2731305               | 5.5E-07  |
| cg19250799 | chr1       | Island       | 0.503207091                             | 0.060008489                            | -0.4431986               | 2.48E-06 |
| cg05956608 | chr1       | Open Sea     | 0.651368032                             | 0.062765454                            | -0.5886026               | 6.47E-05 |
| cg00085493 | chr1       | North Shore  | 0.532136112                             | 0.132735263                            | -0.3994008               | 0.005087 |
| cg04717485 | chr1       | North Shelf  | 0.53220863                              | 0.233756916                            | -0.2984517               | 0.006099 |
| cg11710659 | chr1       | Open Sea     | 0.511813362                             | 0.144986649                            | -0.3668267               | 0.006639 |
| cg17966560 | chr1       | North Shore  | 0.658032192                             | 0.16460658                             | -0.4934256               | 0.012894 |
| cg15199181 | chr1       | Open Sea     | 0.534716337                             | 0.241762407                            | -0.2929539               | 0.019537 |
| cg16310095 | chr1       | Open Sea     | 0.524135449                             | 0.212702766                            | -0.3114327               | 0.024272 |
| cg22353551 | chr1       | North Shore  | 0.549700338                             | 0.240116948                            | -0.3095834               | 0.026128 |
| cg10158681 | chr10      | Open Sea     | 0.511122638                             | 0.135240281                            | -0.3758824               | 0.003007 |
| cg05194426 | chr10      | South Shore  | 0.574026718                             | 0.152740902                            | -0.4212858               | 0.000572 |
| cg07356745 | chr10      | Open Sea     | 0.673945188                             | 0.150189558                            | -0.5237556               | 0.003342 |
| cg00244001 | chr10      | Open Sea     | 0.52981903                              | 0.0951584                              | -0.4346606               | 7.97E-06 |
| cg10258719 | chr10      | North Shore  | 0.502029167                             | 0.226209537                            | -0.2758196               | 0.018681 |
| cg02185052 | chr10      | South Shore  | 0.503968626                             | 0.118535487                            | -0.3854331               | 0.000106 |
| cg13269555 | chr10      | Island       | 0.553814356                             | 0.165452577                            | -0.3883618               | 0.005674 |
| cg26605164 | chr10      | Island       | 0.551399021                             | 0.112334464                            | -0.4390646               | 0.011682 |
| cg09216670 | chr10      | North Shelf  | 0.554377269                             | 0.215550014                            | -0.3388273               | 0.02279  |
| cg07451524 | chr10      | Island       | 0.521372382                             | 0.197223482                            | -0.3241489               | 0.000425 |
| cg03701930 | chr10      | Open Sea     | 0.591964036                             | 0.160907818                            | -0.4310562               | 4.73E-06 |

|            |       |             |             |             |            |          |
|------------|-------|-------------|-------------|-------------|------------|----------|
| cg06850005 | chr10 | North Shore | 0.562563389 | 0.108365415 | -0.454198  | 0.000473 |
| cg11426080 | chr10 | Open Sea    | 0.557407641 | 0.207194742 | -0.3502129 | 0.000822 |
| cg17481047 | chr10 | Island      | 0.552838535 | 0.155267105 | -0.3975714 | 0.001088 |
| cg19252931 | chr11 | Island      | 0.547138352 | 0.226104309 | -0.321034  | 0.010694 |
| cg08897150 | chr11 | North Shore | 0.559951524 | 0.238934361 | -0.3210172 | 0.032309 |
| cg05550420 | chr11 | Open Sea    | 0.599188526 | 0.218647725 | -0.3805408 | 2.91E-06 |
| cg16029939 | chr11 | Island      | 0.502312042 | 0.149935381 | -0.3523767 | 6.52E-05 |
| cg13912027 | chr11 | Open Sea    | 0.719143091 | 0.085289974 | -0.6338531 | 7.12E-05 |
| cg13300301 | chr11 | South Shore | 0.715851089 | 0.220988282 | -0.4948628 | 0.001072 |
| cg02856190 | chr11 | South Shelf | 0.705464963 | 0.231898378 | -0.4735666 | 0.020097 |
| cg11608884 | chr11 | Island      | 0.645755553 | 0.2136941   | -0.4320615 | 0.009911 |
| cg14630206 | chr11 | North Shore | 0.590413009 | 0.173299396 | -0.4171136 | 0.004082 |
| cg14088196 | chr11 | Open Sea    | 0.621222168 | 0.231913603 | -0.3893086 | 0.000344 |
| cg03983837 | chr11 | Open Sea    | 0.537495017 | 0.09199263  | -0.4455024 | 1.53E-11 |
| cg08533336 | chr11 | Island      | 0.556123724 | 0.076481719 | -0.479642  | 5.2E-05  |
| cg20216139 | chr11 | Island      | 0.517772984 | 0.21866844  | -0.2991045 | 0.019117 |
| cg04216117 | chr11 | South Shore | 0.550310382 | 0.178924068 | -0.3713863 | 0.025568 |
| cg11261850 | chr11 | Open Sea    | 0.610001353 | 0.245801601 | -0.3641998 | 0.042109 |
| cg06734406 | chr12 | Island      | 0.51901516  | 0.164339123 | -0.354676  | 0.002097 |
| cg05361096 | chr12 | Island      | 0.551572031 | 0.227491702 | -0.3240803 | 0.01367  |
| cg04046364 | chr12 | Open Sea    | 0.566999913 | 0.245463699 | -0.3215362 | 0.018471 |
| cg20166714 | chr12 | Island      | 0.542808401 | 0.063831294 | -0.4789771 | 8.96E-10 |
| cg19897003 | chr12 | Island      | 0.536307739 | 0.047843497 | -0.4884642 | 2.27E-09 |
| cg03669590 | chr12 | Island      | 0.514006779 | 0.053791    | -0.4602158 | 3.06E-09 |
| cg20181887 | chr12 | North Shore | 0.722074113 | 0.161152661 | -0.5609215 | 0.01065  |
| cg06647068 | chr12 | South Shore | 0.56229726  | 0.154293572 | -0.4080037 | 9.07E-06 |
| cg26416887 | chr12 | Open Sea    | 0.58648471  | 0.089136135 | -0.4973486 | 2.46E-05 |
| cg11265839 | chr12 | South Shelf | 0.687556214 | 0.216454163 | -0.4711021 | 6.76E-08 |
| cg18705931 | chr12 | Island      | 0.596051663 | 0.198107275 | -0.3979444 | 0.00021  |
| cg06611426 | chr12 | South Shelf | 0.636022428 | 0.248624069 | -0.3873984 | 0.01413  |
| cg19554257 | chr12 | Open Sea    | 0.519510818 | 0.199205693 | -0.3203051 | 0.019456 |
| cg11050793 | chr12 | South Shelf | 0.628728626 | 0.207123725 | -0.4216049 | 0.012259 |
| cg09093210 | chr12 | Island      | 0.538317553 | 0.242428576 | -0.295889  | 0.001449 |
| cg07687131 | chr12 | South Shore | 0.500869412 | 0.109979201 | -0.3908902 | 7.36E-06 |
| cg11090202 | chr12 | North Shore | 0.508017898 | 0.153286651 | -0.3547312 | 2.33E-07 |
| cg09002919 | chr12 | Open Sea    | 0.608669538 | 0.180936648 | -0.4277329 | 9.05E-06 |
| cg18810681 | chr12 | Open Sea    | 0.527656363 | 0.214671791 | -0.3129846 | 1.03E-05 |
| cg13581015 | chr12 | North Shore | 0.570987708 | 0.174026476 | -0.3969612 | 0.000272 |
| cg24834394 | chr12 | Open Sea    | 0.568638321 | 0.137594257 | -0.4310441 | 0.02207  |
| cg17322044 | chr12 | Open Sea    | 0.642194735 | 0.176638237 | -0.4655565 | 0.040083 |
| cg00806704 | chr13 | North Shore | 0.543771085 | 0.169465321 | -0.3743058 | 1.84E-06 |
| cg06048436 | chr13 | Open Sea    | 0.565921719 | 0.131721907 | -0.4341998 | 2.81E-05 |
| cg16131748 | chr13 | Open Sea    | 0.537129254 | 0.109036845 | -0.4280924 | 0.002111 |
| cg24453118 | chr13 | Open Sea    | 0.550716539 | 0.135080261 | -0.4156363 | 0.003404 |
| cg25658983 | chr13 | Open Sea    | 0.501213814 | 0.199256932 | -0.3019569 | 0.033995 |
| cg11570656 | chr13 | North Shore | 0.522539392 | 0.241998039 | -0.2805414 | 2.11E-06 |
| cg09942546 | chr13 | North Shore | 0.513279818 | 0.143876736 | -0.3694031 | 5.77E-05 |
| cg03697308 | chr13 | South Shore | 0.580070985 | 0.174062257 | -0.4060087 | 0.018904 |
| cg16896868 | chr13 | Open Sea    | 0.641887714 | 0.186809648 | -0.4550781 | 0.039977 |
| cg15975806 | chr13 | Open Sea    | 0.662749127 | 0.208780551 | -0.4539686 | 0.044057 |

|            |       |             |             |             |            |          |
|------------|-------|-------------|-------------|-------------|------------|----------|
| cg14233720 | chr14 | Open Sea    | 0.533981257 | 0.183019772 | -0.3509615 | 0.009359 |
| cg06834875 | chr14 | Island      | 0.582980785 | 0.128103302 | -0.4548775 | 0.001316 |
| cg00808648 | chr14 | North Shore | 0.596134495 | 0.192280253 | -0.4038542 | 0.018129 |
| cg09636214 | chr14 | Island      | 0.633117903 | 0.080828398 | -0.5522895 | 2.04E-08 |
| cg21885107 | chr14 | Island      | 0.564456926 | 0.241334759 | -0.3231222 | 0.024524 |
| cg26094789 | chr14 | Island      | 0.567750559 | 0.191750029 | -0.3760005 | 0.001098 |
| cg18512948 | chr14 | Island      | 0.511128762 | 0.244904442 | -0.2662243 | 0.000143 |
| cg16597391 | chr14 | Island      | 0.532110729 | 0.173482492 | -0.3586282 | 0.00013  |
| cg24169669 | chr14 | Island      | 0.556549288 | 0.158518519 | -0.3980308 | 0.001997 |
| cg12922751 | chr14 | North Shore | 0.565939127 | 0.137922235 | -0.4280169 | 0.008818 |
| cg12978105 | chr14 | Island      | 0.527074032 | 0.188047139 | -0.3390269 | 0.009819 |
| cg09317728 | chr14 | Open Sea    | 0.534337308 | 0.173617785 | -0.3607195 | 0.009878 |
| cg23511824 | chr14 | Open Sea    | 0.640973377 | 0.164733902 | -0.4762395 | 0.022981 |
| cg05926722 | chr14 | Island      | 0.623725917 | 0.151565513 | -0.4721604 | 0.023197 |
| cg27370471 | chr15 | Open Sea    | 0.515096241 | 0.200538464 | -0.3145578 | 0.000332 |
| cg26127778 | chr15 | Island      | 0.561765906 | 0.18246296  | -0.3793029 | 2.43E-06 |
| cg12134633 | chr15 | Open Sea    | 0.53748071  | 0.237630366 | -0.2998503 | 0.040602 |
| cg00027650 | chr15 | Open Sea    | 0.658637122 | 0.216560871 | -0.4420763 | 0.034551 |
| cg26150514 | chr15 | North Shelf | 0.731172942 | 0.161903609 | -0.5692693 | 5.71E-14 |
| cg05994244 | chr15 | Island      | 0.585900835 | 0.167098651 | -0.4188022 | 4.45E-10 |
| cg01953658 | chr15 | North Shore | 0.555394799 | 0.109195969 | -0.4461988 | 3.11E-07 |
| cg04854226 | chr15 | North Shore | 0.561784012 | 0.204379442 | -0.3574046 | 2.45E-05 |
| cg03717836 | chr15 | Open Sea    | 0.619304064 | 0.143796424 | -0.4755076 | 3.24E-05 |
| cg01218896 | chr15 | South Shore | 0.508903084 | 0.119823544 | -0.3890795 | 5.63E-05 |
| cg12177851 | chr15 | Open Sea    | 0.607914648 | 0.248779965 | -0.3591347 | 0.000346 |
| cg14494620 | chr15 | Island      | 0.667860189 | 0.18278914  | -0.485071  | 0.043256 |
| cg16668651 | chr15 | Open Sea    | 0.552914097 | 0.135965051 | -0.416949  | 0.04424  |
| cg09854734 | chr16 | Island      | 0.52123887  | 0.101094455 | -0.4201444 | 2.11E-05 |
| cg16547186 | chr16 | Open Sea    | 0.504256663 | 0.114667349 | -0.3895893 | 0.005388 |
| cg26580413 | chr16 | Open Sea    | 0.561941106 | 0.190119454 | -0.3718217 | 0.014079 |
| cg02220965 | chr16 | North Shore | 0.543325743 | 0.200876275 | -0.3424495 | 0.000569 |
| cg03720617 | chr16 | Open Sea    | 0.527541771 | 0.095707898 | -0.4318339 | 1.69E-07 |
| cg02910054 | chr16 | Open Sea    | 0.646667444 | 0.151978527 | -0.4946889 | 6.47E-07 |
| cg01252526 | chr16 | North Shore | 0.638876506 | 0.118081535 | -0.520795  | 3.4E-05  |
| cg08537367 | chr16 | Open Sea    | 0.648059857 | 0.168380072 | -0.4796798 | 0.028987 |
| cg07336350 | chr16 | Island      | 0.676705383 | 0.165226959 | -0.5114784 | 3.5E-12  |
| cg04294437 | chr16 | Island      | 0.52432574  | 0.117339654 | -0.4069861 | 1.08E-10 |
| cg05364884 | chr16 | Open Sea    | 0.629567633 | 0.062814915 | -0.5667527 | 1.83E-07 |
| cg26706803 | chr16 | Open Sea    | 0.524735138 | 0.146065954 | -0.3786692 | 1.78E-05 |
| cg07676361 | chr16 | South Shore | 0.621663889 | 0.153481995 | -0.4681819 | 3.82E-05 |
| cg08394412 | chr16 | Island      | 0.701942791 | 0.145822679 | -0.5561201 | 0.002061 |
| cg09275704 | chr16 | Island      | 0.564331747 | 0.140944305 | -0.4233874 | 0.004133 |
| cg05766489 | chr16 | Island      | 0.599646934 | 0.248095618 | -0.3515513 | 0.015574 |
| cg08773462 | chr16 | Open Sea    | 0.676167698 | 0.1551086   | -0.5210591 | 0.029152 |
| cg00767069 | chr16 | Open Sea    | 0.571978583 | 0.22137964  | -0.3505989 | 0.036531 |
| cg04253954 | chr16 | North Shelf | 0.578355526 | 0.235012312 | -0.3433432 | 0.045048 |
| cg04293307 | chr17 | North Shelf | 0.521832177 | 0.233016354 | -0.2888158 | 0.017835 |
| cg11638071 | chr17 | South Shelf | 0.521920582 | 0.166042515 | -0.3558781 | 0.005722 |
| cg22349396 | chr17 | Island      | 0.530945687 | 0.18834874  | -0.3425969 | 0.001159 |
| cg24394631 | chr17 | South Shore | 0.50793735  | 0.093148361 | -0.414789  | 1.64E-05 |

|            |       |             |             |             |            |          |
|------------|-------|-------------|-------------|-------------|------------|----------|
| cg21301440 | chr17 | Island      | 0.501871993 | 0.166092137 | -0.3357799 | 0.000154 |
| cg22473770 | chr17 | Open Sea    | 0.611944788 | 0.164190172 | -0.4477546 | 0.027321 |
| cg18105842 | chr17 | North Shore | 0.57139696  | 0.2415211   | -0.3298759 | 1.59E-06 |
| cg23796525 | chr17 | Open Sea    | 0.522662488 | 0.169069955 | -0.3535925 | 9.06E-08 |
| cg12776171 | chr17 | Island      | 0.673887083 | 0.163404766 | -0.5104823 | 8.96E-08 |
| cg21327194 | chr17 | Island      | 0.556804439 | 0.169462426 | -0.387342  | 0.003041 |
| cg09313705 | chr17 | South Shore | 0.509027358 | 0.11966752  | -0.3893598 | 4.08E-07 |
| cg13533061 | chr17 | Open Sea    | 0.51041017  | 0.102321371 | -0.4080888 | 0.000479 |
| cg04911139 | chr17 | Open Sea    | 0.539705902 | 0.114735233 | -0.4249707 | 4.05E-09 |
| cg12744859 | chr17 | Island      | 0.626719848 | 0.167930484 | -0.4587894 | 0.009083 |
| cg08471713 | chr17 | Open Sea    | 0.676895521 | 0.172862615 | -0.5040329 | 0.011549 |
| cg10235355 | chr17 | Island      | 0.570648428 | 0.202882019 | -0.3677664 | 0.028089 |
| cg04030486 | chr17 | Island      | 0.53570557  | 0.170133487 | -0.3655721 | 0.031229 |
| cg00435173 | chr17 | Open Sea    | 0.625870419 | 0.187593302 | -0.4382771 | 0.027265 |
| cg24136700 | chr17 | North Shore | 0.608998321 | 0.187215062 | -0.4217833 | 3.58E-05 |
| cg22292753 | chr17 | Open Sea    | 0.556785448 | 0.190919079 | -0.3658664 | 0.003025 |
| cg02299328 | chr17 | North Shore | 0.616493439 | 0.215331495 | -0.4011619 | 8.44E-10 |
| cg17746570 | chr17 | North Shelf | 0.606265731 | 0.24322797  | -0.3630378 | 0.00107  |
| cg06412669 | chr17 | Open Sea    | 0.548535426 | 0.161622968 | -0.3869125 | 0.005733 |
| cg09300114 | chr17 | Island      | 0.58750837  | 0.127086239 | -0.4604221 | 0.000172 |
| cg08224920 | chr17 | Island      | 0.537832022 | 0.185860979 | -0.351971  | 0.004873 |
| cg06376598 | chr17 | Open Sea    | 0.606682403 | 0.072656691 | -0.5340257 | 7.21E-11 |
| cg03845363 | chr17 | Open Sea    | 0.563961158 | 0.235837878 | -0.3281233 | 0.025766 |
| cg10080732 | chr17 | North Shore | 0.531638999 | 0.202062684 | -0.3295763 | 0.032893 |
| cg21851534 | chr17 | Island      | 0.584198039 | 0.097112507 | -0.4870855 | 0.014374 |
| cg07673979 | chr17 | South Shelf | 0.618282089 | 0.185270265 | -0.4330118 | 3.74E-08 |
| cg15938050 | chr17 | Open Sea    | 0.509187231 | 0.128208969 | -0.3809783 | 1.53E-05 |
| cg11692124 | chr17 | Island      | 0.539146449 | 0.131527113 | -0.4076193 | 1.97E-05 |
| cg14244013 | chr17 | Island      | 0.64761342  | 0.220999    | -0.4266144 | 9.85E-05 |
| cg25140190 | chr18 | North Shore | 0.683158122 | 0.232633856 | -0.4505243 | 4.08E-10 |
| cg19448837 | chr18 | North Shore | 0.512201314 | 0.241426222 | -0.2707751 | 0.016632 |
| cg21956434 | chr19 | Open Sea    | 0.540710212 | 0.225122821 | -0.3155874 | 1.54E-06 |
| cg11660879 | chr19 | Island      | 0.51308591  | 0.069656584 | -0.4434293 | 7.25E-09 |
| cg12019614 | chr19 | Island      | 0.577379152 | 0.129902924 | -0.4474762 | 3.65E-08 |
| cg13456960 | chr19 | North Shore | 0.562477696 | 0.053635562 | -0.5088421 | 2.44E-09 |
| cg08420572 | chr19 | Island      | 0.585166631 | 0.037202207 | -0.5479644 | 4.13E-12 |
| cg24102622 | chr19 | Island      | 0.534305985 | 0.0396139   | -0.4946921 | 2.63E-10 |
| cg20454073 | chr19 | Island      | 0.548802162 | 0.072423732 | -0.4763784 | 5.37E-10 |
| cg09547756 | chr19 | Island      | 0.533320299 | 0.140046467 | -0.3932738 | 0.03537  |
| cg16167052 | chr19 | Island      | 0.500477919 | 0.153992001 | -0.3464859 | 2.65E-07 |
| cg02849693 | chr19 | Island      | 0.586564516 | 0.136701257 | -0.4498633 | 0.001148 |
| cg23690893 | chr19 | Open Sea    | 0.661858187 | 0.216850591 | -0.4450076 | 0.000133 |
| cg04728310 | chr19 | Island      | 0.502533408 | 0.120129215 | -0.3824042 | 2.76E-07 |
| cg22004069 | chr19 | North Shelf | 0.54221111  | 0.227701283 | -0.3145098 | 3.84E-07 |
| cg22436086 | chr19 | Island      | 0.622538966 | 0.230406123 | -0.3921328 | 0.000321 |
| cg23372544 | chr19 | Island      | 0.549472996 | 0.196533696 | -0.3529393 | 0.021678 |
| cg13758331 | chr2  | Open Sea    | 0.567783824 | 0.189079412 | -0.3787044 | 0.00402  |
| cg12852187 | chr2  | South Shore | 0.509178564 | 0.239763946 | -0.2694146 | 0.008323 |
| cg04512966 | chr2  | Open Sea    | 0.567960639 | 0.148481703 | -0.4194789 | 5.56E-07 |
| cg19744173 | chr2  | North Shelf | 0.627370505 | 0.116144174 | -0.5112263 | 0.03378  |

|            |       |             |             |             |            |          |
|------------|-------|-------------|-------------|-------------|------------|----------|
| cg25586410 | chr2  | North Shore | 0.603832689 | 0.106811911 | -0.4970208 | 1.68E-08 |
| cg05758467 | chr2  | South Shelf | 0.68307496  | 0.182433088 | -0.5006419 | 2.45E-05 |
| cg17939889 | chr2  | Open Sea    | 0.504080408 | 0.169181674 | -0.3348987 | 0.03097  |
| cg14020052 | chr2  | Open Sea    | 0.611928445 | 0.179007233 | -0.4329212 | 0.035523 |
| cg19071452 | chr2  | South Shore | 0.501854995 | 0.241230905 | -0.2606241 | 0.014199 |
| cg18145759 | chr2  | Open Sea    | 0.527328578 | 0.1488776   | -0.378451  | 0.02529  |
| cg06819718 | chr2  | North Shore | 0.503228844 | 0.169436424 | -0.3337924 | 9.09E-06 |
| cg03517776 | chr2  | North Shore | 0.56683862  | 0.058510396 | -0.5083282 | 1.89E-08 |
| cg27598107 | chr2  | South Shore | 0.64076096  | 0.095494311 | -0.5452666 | 5.91E-06 |
| cg00028211 | chr2  | North Shore | 0.508210579 | 0.21733728  | -0.2908733 | 0.001007 |
| cg04065472 | chr2  | North Shore | 0.566402339 | 0.120564969 | -0.4458374 | 0.002663 |
| cg19753675 | chr2  | North Shore | 0.54248294  | 0.225424126 | -0.3170588 | 0.00269  |
| cg02598079 | chr2  | North Shelf | 0.539701312 | 0.205887643 | -0.3338137 | 0.00557  |
| cg05403316 | chr2  | Open Sea    | 0.562397656 | 0.200528428 | -0.3618692 | 0.011485 |
| cg16700364 | chr2  | South Shore | 0.512681757 | 0.172877359 | -0.3398044 | 0.02098  |
| cg11039476 | chr2  | South Shore | 0.51359361  | 0.148456803 | -0.3651368 | 0.03289  |
| cg11577716 | chr20 | Open Sea    | 0.573709707 | 0.207985831 | -0.3657239 | 8.63E-05 |
| cg15815827 | chr20 | South Shelf | 0.534383544 | 0.218335593 | -0.316048  | 0.017911 |
| cg04628369 | chr20 | Island      | 0.606056809 | 0.072461951 | -0.5335949 | 1.39E-08 |
| cg11988036 | chr20 | Island      | 0.579907701 | 0.065773101 | -0.5141346 | 0.00062  |
| cg24865779 | chr21 | North Shore | 0.528213859 | 0.054882025 | -0.4733318 | 8.01E-08 |
| cg21241823 | chr21 | Open Sea    | 0.565912594 | 0.137740906 | -0.4281717 | 2.27E-05 |
| cg14081667 | chr21 | Island      | 0.572909367 | 0.037431064 | -0.5354783 | 8.1E-10  |
| cg05602642 | chr22 | North Shore | 0.564730299 | 0.199182011 | -0.3655483 | 0.000377 |
| cg15209808 | chr22 | Island      | 0.57786879  | 0.159973803 | -0.417895  | 0.02027  |
| cg23268208 | chr22 | Island      | 0.534907708 | 0.206488886 | -0.3284188 | 0.046698 |
| cg01141459 | chr22 | Island      | 0.566396241 | 0.171211039 | -0.3951852 | 0.000265 |
| cg26842622 | chr22 | South Shore | 0.501065094 | 0.183382247 | -0.3176828 | 7.1E-05  |
| cg18548864 | chr3  | Open Sea    | 0.590762202 | 0.189449672 | -0.4013125 | 0.043348 |
| cg15554421 | chr3  | Open Sea    | 0.672836428 | 0.194129867 | -0.4787066 | 0.045729 |
| cg25821785 | chr3  | South Shore | 0.503014643 | 0.147724815 | -0.3552898 | 9.47E-05 |
| cg09678212 | chr3  | Island      | 0.503274896 | 0.21970121  | -0.2835737 | 0.000687 |
| cg25736251 | chr3  | North Shore | 0.504687683 | 0.199557234 | -0.3051304 | 6.86E-05 |
| cg08038033 | chr3  | Open Sea    | 0.509887572 | 0.072032232 | -0.4378553 | 9.12E-06 |
| cg07475026 | chr3  | Open Sea    | 0.653832921 | 0.21877898  | -0.4350539 | 0.0219   |
| cg11377213 | chr3  | Open Sea    | 0.606955256 | 0.178619718 | -0.4283355 | 0.004025 |
| cg24859722 | chr3  | Island      | 0.552572309 | 0.14508022  | -0.4074921 | 0.014875 |
| cg12198140 | chr3  | Open Sea    | 0.520312461 | 0.08653348  | -0.433779  | 7.14E-09 |
| cg03476195 | chr4  | Open Sea    | 0.591522636 | 0.088281345 | -0.5032413 | 5.57E-10 |
| cg02060584 | chr4  | Open Sea    | 0.531062375 | 0.138516209 | -0.3925462 | 0.000161 |
| cg05826175 | chr4  | Open Sea    | 0.518617774 | 0.1829891   | -0.3356287 | 0.000162 |
| cg00547103 | chr4  | Open Sea    | 0.573498616 | 0.182242619 | -0.391256  | 0.002456 |
| cg15400629 | chr4  | North Shore | 0.523050781 | 0.173969578 | -0.3490812 | 0.041026 |
| cg12426146 | chr4  | Island      | 0.530024476 | 0.242102257 | -0.2879222 | 0.021966 |
| cg16742873 | chr4  | Island      | 0.513037669 | 0.161093308 | -0.3519444 | 0.018456 |
| cg05658107 | chr4  | Open Sea    | 0.557120337 | 0.112297121 | -0.4448232 | 0.002323 |
| cg04370174 | chr4  | Open Sea    | 0.620255668 | 0.193229683 | -0.427026  | 3.11E-10 |
| cg07816074 | chr4  | Open Sea    | 0.735007782 | 0.185605292 | -0.5494025 | 0.00847  |
| cg20128928 | chr4  | Island      | 0.503082408 | 0.213808799 | -0.2892736 | 0.011431 |
| cg00890363 | chr4  | North Shelf | 0.617377888 | 0.051462769 | -0.5659151 | 4.85E-14 |

|            |      |             |             |             |            |          |
|------------|------|-------------|-------------|-------------|------------|----------|
| cg20815297 | chr4 | North Shore | 0.519533672 | 0.093741772 | -0.4257919 | 4E-12    |
| cg09354241 | chr4 | North Shelf | 0.59130357  | 0.067711034 | -0.5235925 | 1.03E-08 |
| cg03967798 | chr4 | Open Sea    | 0.575348858 | 0.134596039 | -0.4407528 | 0.005261 |
| cg09160776 | chr4 | Island      | 0.54672542  | 0.162201718 | -0.3845237 | 0.006376 |
| cg25243082 | chr4 | Open Sea    | 0.549630797 | 0.174212483 | -0.3754183 | 0.023581 |
| cg01288724 | chr5 | Open Sea    | 0.53189629  | 0.183004681 | -0.3488916 | 0.011995 |
| cg15712777 | chr5 | Open Sea    | 0.557410806 | 0.136764152 | -0.4206467 | 0.000464 |
| cg16198692 | chr5 | South Shore | 0.555021703 | 0.214766433 | -0.3402553 | 0.033055 |
| cg24628744 | chr5 | South Shore | 0.50055131  | 0.137880116 | -0.3626712 | 0.019292 |
| cg09731996 | chr5 | Island      | 0.530873177 | 0.147303826 | -0.3835694 | 0.000235 |
| cg26620356 | chr5 | South Shore | 0.552908132 | 0.157515369 | -0.3953928 | 0.043678 |
| cg16361890 | chr5 | North Shelf | 0.545433434 | 0.156674722 | -0.3887587 | 0.003532 |
| cg11316131 | chr5 | South Shore | 0.52875868  | 0.104116139 | -0.4246425 | 0.000228 |
| cg25233672 | chr5 | Open Sea    | 0.531411817 | 0.186091207 | -0.3453206 | 1.02E-06 |
| cg02331883 | chr5 | North Shore | 0.589850566 | 0.126888751 | -0.4629618 | 1.39E-07 |
| cg26389330 | chr5 | Open Sea    | 0.676715697 | 0.103262163 | -0.5734535 | 5.99E-05 |
| cg21546155 | chr5 | Open Sea    | 0.588921981 | 0.071777073 | -0.5171449 | 1.78E-10 |
| cg09844976 | chr5 | Open Sea    | 0.596326946 | 0.094336811 | -0.5019901 | 7.52E-09 |
| cg09067459 | chr5 | Open Sea    | 0.536408592 | 0.093427098 | -0.4429815 | 1.32E-07 |
| cg03547840 | chr5 | Island      | 0.564319554 | 0.10912793  | -0.4551916 | 1.76E-07 |
| cg03807298 | chr5 | Island      | 0.58592455  | 0.082062355 | -0.5038622 | 2.57E-07 |
| cg22855900 | chr5 | Island      | 0.557614368 | 0.128097244 | -0.4295171 | 9.62E-07 |
| cg21545862 | chr5 | Island      | 0.574852514 | 0.106377862 | -0.4684747 | 2.92E-05 |
| cg22108469 | chr5 | Island      | 0.50785188  | 0.184727223 | -0.3231247 | 0.011188 |
| cg11382082 | chr5 | North Shore | 0.500059109 | 0.232630344 | -0.2674288 | 0.01626  |
| cg02601475 | chr5 | Open Sea    | 0.504660039 | 0.216275581 | -0.2883845 | 0.022596 |
| cg25125298 | chr5 | Open Sea    | 0.572002021 | 0.179097633 | -0.3929044 | 0.0278   |
| cg22052143 | chr5 | Open Sea    | 0.688363871 | 0.242921849 | -0.445442  | 0.040275 |
| cg11348249 | chr6 | Island      | 0.637955916 | 0.188282634 | -0.4496733 | 0.007482 |
| cg06289138 | chr6 | Island      | 0.514978012 | 0.20494261  | -0.3100354 | 0.027275 |
| cg15373592 | chr6 | North Shelf | 0.654578368 | 0.191500745 | -0.4630776 | 0.00133  |
| cg09130674 | chr6 | North Shore | 0.584899244 | 0.095451612 | -0.4894476 | 0.000876 |
| cg14663965 | chr6 | North Shore | 0.503046626 | 0.19709784  | -0.3059488 | 1.25E-06 |
| cg25634742 | chr6 | North Shore | 0.572186287 | 0.193206874 | -0.3789794 | 5.41E-06 |
| cg20837557 | chr6 | North Shore | 0.526494206 | 0.165031532 | -0.3614627 | 0.002151 |
| cg01344171 | chr6 | North Shore | 0.581527082 | 0.21389354  | -0.3676335 | 0.042535 |
| cg23503775 | chr6 | Open Sea    | 0.555120085 | 0.076136146 | -0.4789839 | 1.13E-09 |
| cg03818715 | chr6 | South Shore | 0.50269392  | 0.238616117 | -0.2640778 | 0.001547 |
| cg10977795 | chr6 | Island      | 0.615340109 | 0.128510036 | -0.4868301 | 0.022252 |
| cg06327227 | chr6 | Open Sea    | 0.707324685 | 0.206685933 | -0.5006388 | 0.023911 |
| cg10296205 | chr6 | Open Sea    | 0.621427086 | 0.096064173 | -0.5253629 | 8.62E-06 |
| cg07631407 | chr6 | Island      | 0.564897111 | 0.168857658 | -0.3960395 | 0.003147 |
| cg00643235 | chr6 | Open Sea    | 0.604017811 | 0.235247609 | -0.3687702 | 0.007729 |
| cg01524618 | chr6 | Open Sea    | 0.544006228 | 0.103771945 | -0.4402343 | 1.67E-06 |
| cg17340729 | chr6 | Open Sea    | 0.591602321 | 0.10477474  | -0.4868276 | 6.87E-08 |
| cg12279419 | chr6 | Island      | 0.565780094 | 0.084692555 | -0.4810875 | 4.12E-07 |
| cg12106976 | chr6 | Open Sea    | 0.613424437 | 0.072214917 | -0.5412095 | 4.6E-07  |
| cg26242687 | chr6 | North Shore | 0.547529025 | 0.179110962 | -0.3684181 | 1.5E-06  |
| cg22244192 | chr6 | Island      | 0.527239419 | 0.09396283  | -0.4332766 | 1.9E-06  |
| cg00333679 | chr6 | Island      | 0.530365958 | 0.175970518 | -0.3543954 | 0.000123 |

|            |      |             |             |             |            |          |
|------------|------|-------------|-------------|-------------|------------|----------|
| cg16151362 | chr6 | South Shore | 0.508655321 | 0.108842025 | -0.3998133 | 0.000488 |
| cg08864645 | chr6 | Island      | 0.532704308 | 0.149511358 | -0.383193  | 0.002027 |
| cg11796455 | chr6 | South Shore | 0.572459851 | 0.197471613 | -0.3749882 | 0.005336 |
| cg04496791 | chr6 | North Shore | 0.540529765 | 0.204986938 | -0.3355428 | 0.017563 |
| cg12182937 | chr6 | North Shore | 0.593747156 | 0.228146475 | -0.3656007 | 0.019165 |
| cg18419358 | chr6 | Open Sea    | 0.688301452 | 0.177418015 | -0.5108834 | 0.034524 |
| cg20139336 | chr6 | Open Sea    | 0.618264112 | 0.198719545 | -0.4195446 | 0.037761 |
| cg24113409 | chr6 | South Shore | 0.506413596 | 0.207179268 | -0.2992343 | 0.037884 |
| cg00555456 | chr7 | North Shore | 0.606614208 | 0.238067239 | -0.368547  | 0.000536 |
| cg04372674 | chr7 | Open Sea    | 0.510494905 | 0.197359306 | -0.3131356 | 0.04446  |
| cg05803296 | chr7 | Open Sea    | 0.511596545 | 0.079366142 | -0.4322304 | 8.44E-10 |
| cg14427668 | chr7 | Open Sea    | 0.50094812  | 0.081044221 | -0.4199039 | 1.73E-08 |
| cg18527241 | chr7 | Open Sea    | 0.582837079 | 0.079240966 | -0.5035961 | 1.45E-06 |
| cg01322214 | chr7 | North Shore | 0.690450094 | 0.19615091  | -0.4942992 | 0.045992 |
| cg13391244 | chr7 | Open Sea    | 0.572240002 | 0.093981143 | -0.4782589 | 4.94E-08 |
| cg09642347 | chr7 | North Shore | 0.529674261 | 0.189405217 | -0.340269  | 0.001315 |
| cg25711558 | chr7 | Open Sea    | 0.638114018 | 0.114170666 | -0.5239434 | 0.000399 |
| cg21389309 | chr7 | South Shore | 0.51746591  | 0.167887441 | -0.3495785 | 0.001279 |
| cg03604067 | chr7 | South Shore | 0.551905284 | 0.056214438 | -0.4956908 | 1.63E-09 |
| cg08309529 | chr7 | Island      | 0.524882846 | 0.068009859 | -0.456873  | 6.68E-06 |
| cg12164596 | chr7 | Island      | 0.527771417 | 0.142098935 | -0.3856725 | 0.000583 |
| cg04598292 | chr7 | North Shore | 0.522968171 | 0.093739967 | -0.4292282 | 5.35E-07 |
| cg11435506 | chr7 | Island      | 0.539259225 | 0.062574662 | -0.4766846 | 2.45E-09 |
| cg04080282 | chr7 | Island      | 0.610020809 | 0.118586238 | -0.4914346 | 4.04E-09 |
| cg08898155 | chr7 | Island      | 0.532598987 | 0.061654327 | -0.4709447 | 2.66E-08 |
| cg25161512 | chr7 | Island      | 0.518469595 | 0.059418327 | -0.4590513 | 3.68E-08 |
| cg15927196 | chr7 | Island      | 0.511549656 | 0.078235679 | -0.433314  | 1.08E-05 |
| cg10329418 | chr7 | South Shore | 0.512608728 | 0.217477769 | -0.295131  | 0.000379 |
| cg04685170 | chr7 | Island      | 0.513213494 | 0.107021274 | -0.4061922 | 0.00396  |
| cg05167561 | chr7 | Island      | 0.553472949 | 0.178829685 | -0.3746433 | 9.02E-06 |
| cg25007683 | chr7 | Open Sea    | 0.556024549 | 0.144083292 | -0.4119413 | 2.42E-07 |
| cg21637392 | chr7 | Open Sea    | 0.542882065 | 0.083361758 | -0.4595203 | 9.27E-08 |
| cg10094489 | chr7 | Island      | 0.503028766 | 0.091750946 | -0.4112778 | 4.64E-05 |
| cg17871993 | chr7 | South Shelf | 0.524991358 | 0.100873061 | -0.4241183 | 5.2E-05  |
| cg07981013 | chr7 | Island      | 0.547358895 | 0.079869549 | -0.4674893 | 1.81E-09 |
| cg07686872 | chr7 | North Shore | 0.640466909 | 0.107920386 | -0.5325465 | 8.4E-08  |
| cg04487296 | chr7 | Island      | 0.588915724 | 0.220036106 | -0.3688796 | 0.000417 |
| cg13710553 | chr7 | Open Sea    | 0.57225554  | 0.23323454  | -0.339021  | 0.00049  |
| cg26565544 | chr7 | Open Sea    | 0.51694317  | 0.235654003 | -0.2812892 | 0.00283  |
| cg16180796 | chr7 | Island      | 0.569136789 | 0.190195493 | -0.3789413 | 0.004865 |
| cg18550262 | chr7 | Open Sea    | 0.643855033 | 0.15464274  | -0.4892123 | 0.011164 |
| cg19799702 | chr7 | North Shore | 0.536150638 | 0.22918021  | -0.3069704 | 0.012208 |
| cg17642369 | chr7 | Open Sea    | 0.519474223 | 0.141254662 | -0.3782196 | 0.023212 |
| cg08132858 | chr7 | Open Sea    | 0.51076653  | 0.230896367 | -0.2798702 | 0.027168 |
| cg11342198 | chr7 | Open Sea    | 0.500058965 | 0.170040041 | -0.3300189 | 0.040152 |
| cg19351954 | chr7 | Open Sea    | 0.591349836 | 0.177025376 | -0.4143245 | 0.048189 |
| cg17963840 | chr8 | Island      | 0.510892797 | 0.210698726 | -0.3001941 | 0.019181 |
| cg23816247 | chr8 | South Shore | 0.50186278  | 0.102465358 | -0.3993974 | 0.000639 |
| cg00713567 | chr8 | Island      | 0.546962467 | 0.229682771 | -0.3172797 | 0.042635 |
| cg02046552 | chr8 | Island      | 0.551533013 | 0.208137915 | -0.3433951 | 0.024525 |

|            |      |             |             |             |            |          |
|------------|------|-------------|-------------|-------------|------------|----------|
| cg03979241 | chr8 | South Shelf | 0.580701911 | 0.241834003 | -0.3388679 | 2.18E-06 |
| cg11931596 | chr8 | Open Sea    | 0.545507416 | 0.128272366 | -0.4172351 | 0.026233 |
| cg14657725 | chr8 | North Shore | 0.562751916 | 0.220047693 | -0.3427042 | 0.038761 |
| cg22524061 | chr8 | North Shore | 0.574589441 | 0.176428412 | -0.398161  | 0.040149 |
| cg09015433 | chr8 | Island      | 0.511195995 | 0.239339125 | -0.2718569 | 0.030741 |
| cg03066788 | chr8 | Open Sea    | 0.630675387 | 0.221053621 | -0.4096218 | 0.01127  |
| cg17788832 | chr8 | Island      | 0.504833792 | 0.094057849 | -0.4107759 | 0.001627 |
| cg15541630 | chr8 | Island      | 0.606029193 | 0.168580156 | -0.437449  | 0.003975 |
| cg20982735 | chr8 | Island      | 0.615651331 | 0.154204928 | -0.4614464 | 0.00408  |
| cg04717143 | chr8 | Island      | 0.525039517 | 0.168316303 | -0.3567232 | 0.039273 |
| cg07570470 | chr8 | Island      | 0.564182068 | 0.112948107 | -0.451234  | 2.91E-05 |
| cg25673784 | chr8 | South Shore | 0.635241826 | 0.159364828 | -0.475877  | 0.041023 |
| cg13683534 | chr9 | Open Sea    | 0.521784059 | 0.133486206 | -0.3882979 | 0.034016 |
| cg05146756 | chr9 | North Shore | 0.506713702 | 0.141317969 | -0.3653957 | 0.001186 |
| cg07084627 | chr9 | Island      | 0.640197141 | 0.235980061 | -0.4042171 | 6.21E-07 |
| cg12376422 | chr9 | Island      | 0.650976827 | 0.207722175 | -0.4432547 | 0.041086 |
