# Supplementary material
Source: PubMed Central journal article supplement (PMC4622541)
Supplement: kepi-10-03-1006497-s005.pdf [file kepi-10-03-1006497-s005.pdf]

| ID         | Chromosome | CGI.Relation | AVERAGE $\beta$ -VALUE<br>IN CHORDOMA | AVERAGE $\beta$ -VALUE<br>IN CONTROLS | Delta<br>$\beta$ -VALUE | FDR      |
|------------|------------|--------------|---------------------------------------|---------------------------------------|-------------------------|----------|
| cg26883963 | chr1       | Open Sea     | 0.337157379                           | 0.84448066                            | 0.5073233               | 0.004469 |
| cg03448362 | chr1       | Open Sea     | 0.271345562                           | 0.754081068                           | 0.4827355               | 0.003303 |
| cg18765906 | chr1       | Open Sea     | 0.36720507                            | 0.841711699                           | 0.4745066               | 0.000251 |
| cg01876531 | chr1       | Open Sea     | 0.29269652                            | 0.760419532                           | 0.467723                | 1.02E-05 |
| cg22481448 | chr1       | North Shore  | 0.409772607                           | 0.875215907                           | 0.4654433               | 6.2E-09  |
| cg08458637 | chr1       | Open Sea     | 0.429811885                           | 0.889413029                           | 0.4596011               | 0.004671 |
| cg19693031 | chr1       | Open Sea     | 0.39614065                            | 0.845846266                           | 0.4497056               | 0.039727 |
| cg19707677 | chr1       | Open Sea     | 0.449352052                           | 0.895128822                           | 0.4457768               | 1.5E-09  |
| cg06174882 | chr1       | South Shelf  | 0.379235073                           | 0.82484654                            | 0.4456115               | 5.46E-05 |
| cg20989443 | chr1       | Open Sea     | 0.480575346                           | 0.925826031                           | 0.4452507               | 5.5E-11  |
| cg05376738 | chr1       | Open Sea     | 0.374454798                           | 0.811655997                           | 0.4372012               | 0.036969 |
| cg07798602 | chr1       | Open Sea     | 0.444694361                           | 0.874233121                           | 0.4295388               | 0.00151  |
| cg12613632 | chr1       | Open Sea     | 0.386785073                           | 0.814162885                           | 0.4273778               | 0.000328 |
| cg07342108 | chr1       | Open Sea     | 0.44945925                            | 0.872269565                           | 0.4228103               | 1.14E-05 |
| cg00831127 | chr1       | South Shore  | 0.399171232                           | 0.819173654                           | 0.4200024               | 1.44E-08 |
| cg03471346 | chr1       | Open Sea     | 0.240694051                           | 0.657775733                           | 0.4170817               | 0.041406 |
| cg21266630 | chr1       | North Shelf  | 0.471359064                           | 0.887615505                           | 0.4162564               | 3.62E-08 |
| cg03058163 | chr1       | North Shore  | 0.454062528                           | 0.862294866                           | 0.4082323               | 0.001081 |
| cg03749154 | chr1       | North Shelf  | 0.468251163                           | 0.869750779                           | 0.4014996               | 2.15E-05 |
| cg13460934 | chr1       | South Shelf  | 0.470474468                           | 0.869125043                           | 0.3986506               | 8.63E-08 |
| cg06118122 | chr1       | Open Sea     | 0.440812709                           | 0.838579402                           | 0.3977667               | 0.039361 |
| cg07838943 | chr1       | Open Sea     | 0.458488854                           | 0.854517447                           | 0.3960286               | 0.002348 |
| cg24359048 | chr1       | Open Sea     | 0.473521478                           | 0.85956752                            | 0.386046                | 0.000339 |
| cg02493905 | chr1       | Open Sea     | 0.49381184                            | 0.87960093                            | 0.3857891               | 7.72E-05 |
| cg10861751 | chr1       | Open Sea     | 0.414223932                           | 0.799616493                           | 0.3853926               | 0.026222 |
| cg10092779 | chr1       | Open Sea     | 0.484066628                           | 0.864842646                           | 0.380776                | 2.29E-08 |
| cg23085167 | chr1       | North Shelf  | 0.482313538                           | 0.862051336                           | 0.3797378               | 1.22E-07 |
| cg21684179 | chr1       | North Shore  | 0.402569464                           | 0.781550751                           | 0.3789813               | 0.000457 |
| cg21536086 | chr1       | Open Sea     | 0.533276622                           | 0.907636231                           | 0.3743596               | 6.47E-08 |
| cg06099439 | chr1       | North Shore  | 0.372649327                           | 0.746976032                           | 0.3743267               | 0.000341 |
| cg17150265 | chr1       | North Shelf  | 0.439961914                           | 0.812337703                           | 0.3723758               | 2.63E-07 |
| cg17421241 | chr1       | North Shore  | 0.435553952                           | 0.807546411                           | 0.3719925               | 2.49E-09 |
| cg22729681 | chr1       | Open Sea     | 0.479215213                           | 0.850120457                           | 0.3709052               | 0.002061 |
| cg21528710 | chr1       | Open Sea     | 0.495582117                           | 0.866480553                           | 0.3708984               | 3.63E-08 |
| cg25773695 | chr1       | Open Sea     | 0.356671763                           | 0.725707571                           | 0.3690358               | 0.004615 |
| cg05791946 | chr1       | North Shelf  | 0.540684005                           | 0.908251086                           | 0.3675671               | 1.24E-08 |
| cg09828411 | chr1       | Open Sea     | 0.469810784                           | 0.837002657                           | 0.3671919               | 2.07E-07 |
| cg26030470 | chr1       | Open Sea     | 0.513677129                           | 0.875619965                           | 0.3619428               | 0.000734 |
| cg22672625 | chr1       | South Shelf  | 0.527891912                           | 0.889560423                           | 0.3616685               | 5.72E-07 |
| cg00163018 | chr1       | Open Sea     | 0.519761417                           | 0.881242126                           | 0.3614807               | 7.43E-06 |
| cg23935261 | chr1       | Open Sea     | 0.483608731                           | 0.844332945                           | 0.3607242               | 0.002118 |
| cg15059176 | chr1       | North Shore  | 0.479558695                           | 0.83818584                            | 0.3586271               | 0.028595 |
| cg14514991 | chr1       | Open Sea     | 0.50922976                            | 0.867493225                           | 0.3582635               | 0.005497 |
| cg11518938 | chr1       | North Shelf  | 0.373412264                           | 0.731354298                           | 0.357942                | 0.002765 |
| cg24807850 | chr1       | South Shore  | 0.34140064                            | 0.6972592                             | 0.3558586               | 7.27E-05 |
| cg13152158 | chr1       | North Shelf  | 0.56746421                            | 0.922520596                           | 0.3550564               | 1.16E-07 |
| cg12467090 | chr1       | Open Sea     | 0.56152975                            | 0.916585828                           | 0.3550561               | 6.09E-09 |
| cg15202552 | chr1       | Open Sea     | 0.410066537                           | 0.764468365                           | 0.3544018               | 4.84E-08 |

|            |      |             |             |             |           |          |
|------------|------|-------------|-------------|-------------|-----------|----------|
| cg13213165 | chr1 | Open Sea    | 0.504361841 | 0.858642665 | 0.3542808 | 0.03796  |
| cg24042923 | chr1 | Open Sea    | 0.323551625 | 0.676940346 | 0.3533887 | 2.2E-07  |
| cg10092518 | chr1 | Open Sea    | 0.539972738 | 0.886896506 | 0.3469238 | 1.43E-06 |
| cg05628625 | chr1 | South Shore | 0.567935538 | 0.914025607 | 0.3460901 | 6.58E-08 |
| cg26357403 | chr1 | South Shelf | 0.372748033 | 0.718222828 | 0.3454748 | 0.002016 |
| cg05343184 | chr1 | North Shore | 0.437239401 | 0.782066343 | 0.3448269 | 0.000781 |
| cg01048810 | chr1 | South Shelf | 0.378046847 | 0.722369358 | 0.3443225 | 3.16E-08 |
| cg13104274 | chr1 | South Shore | 0.510764932 | 0.854382558 | 0.3436176 | 0.003103 |
| cg15102821 | chr1 | Open Sea    | 0.324532959 | 0.668067608 | 0.3435346 | 0.008063 |
| cg03281194 | chr1 | North Shore | 0.515275051 | 0.856933583 | 0.3416585 | 0.00162  |
| cg04308687 | chr1 | Open Sea    | 0.169347662 | 0.509492064 | 0.3401444 | 0.005367 |
| cg17888259 | chr1 | South Shore | 0.514689965 | 0.854702143 | 0.3400122 | 0.001744 |
| cg11335179 | chr1 | Open Sea    | 0.553335203 | 0.893345894 | 0.3400107 | 9.11E-05 |
| cg06903917 | chr1 | Open Sea    | 0.541921653 | 0.879120828 | 0.3371992 | 8.02E-05 |
| cg04267765 | chr1 | North Shore | 0.523965129 | 0.857705202 | 0.3337401 | 5.43E-07 |
| cg06949778 | chr1 | Open Sea    | 0.486873601 | 0.820602403 | 0.3337288 | 1.79E-06 |
| cg03523254 | chr1 | Open Sea    | 0.567087653 | 0.900191187 | 0.3331035 | 2.1E-07  |
| cg07166084 | chr1 | North Shelf | 0.308750323 | 0.640704009 | 0.3319537 | 0.028594 |
| cg10124445 | chr1 | Open Sea    | 0.556036682 | 0.88593292  | 0.3298962 | 1.34E-07 |
| cg15521745 | chr1 | Open Sea    | 0.519992417 | 0.848344324 | 0.3283519 | 0.00326  |
| cg17891251 | chr1 | Open Sea    | 0.591828102 | 0.918992219 | 0.3271641 | 6.51E-07 |
| cg01785490 | chr1 | Open Sea    | 0.517521633 | 0.844214111 | 0.3266925 | 0.005906 |
| cg24335149 | chr1 | Open Sea    | 0.520043828 | 0.846335566 | 0.3262917 | 0.006288 |
| cg20311002 | chr1 | Open Sea    | 0.515144678 | 0.84078932  | 0.3256446 | 0.017148 |
| cg26515162 | chr1 | North Shore | 0.571649353 | 0.897193073 | 0.3255437 | 0.005721 |
| cg10947764 | chr1 | Open Sea    | 0.59081986  | 0.915595714 | 0.3247759 | 3.84E-07 |
| cg21291134 | chr1 | Open Sea    | 0.487528987 | 0.812135855 | 0.3246069 | 0.021269 |
| cg26864297 | chr1 | North Shelf | 0.548974111 | 0.873547026 | 0.3245729 | 0.004138 |
| cg26026598 | chr1 | Open Sea    | 0.485865759 | 0.810184902 | 0.3243191 | 2.06E-07 |
| cg12137928 | chr1 | Open Sea    | 0.459807479 | 0.783885826 | 0.3240783 | 1.86E-06 |
| cg20484653 | chr1 | South Shelf | 0.532877396 | 0.856947927 | 0.3240705 | 8.99E-06 |
| cg08918576 | chr1 | Open Sea    | 0.481015884 | 0.802633306 | 0.3216174 | 0.018061 |
| cg06203976 | chr1 | North Shore | 0.535946261 | 0.85748252  | 0.3215363 | 8E-05    |
| cg09993145 | chr1 | Open Sea    | 0.232682837 | 0.553826863 | 0.321144  | 0.000189 |
| cg08948808 | chr1 | Open Sea    | 0.453712139 | 0.774175539 | 0.3204634 | 0.009278 |
| cg19904265 | chr1 | South Shelf | 0.36394099  | 0.684068844 | 0.3201279 | 0.007919 |
| cg14843670 | chr1 | Open Sea    | 0.567967508 | 0.887717201 | 0.3197497 | 0.001    |
| cg12689806 | chr1 | Open Sea    | 0.5709748   | 0.888326181 | 0.3173514 | 0.00115  |
| cg15700197 | chr1 | Open Sea    | 0.491297905 | 0.807896621 | 0.3165987 | 0.000771 |
| cg19821682 | chr1 | Open Sea    | 0.499751448 | 0.816078206 | 0.3163268 | 4.59E-07 |
| cg10992558 | chr1 | Open Sea    | 0.522661788 | 0.838586175 | 0.3159244 | 8.34E-08 |
| cg04490113 | chr1 | Open Sea    | 0.564658116 | 0.880275836 | 0.3156177 | 6.56E-06 |
| cg03607855 | chr1 | North Shelf | 0.507995831 | 0.823198892 | 0.3152031 | 0.000698 |
| cg26429783 | chr1 | North Shore | 0.583181776 | 0.898346032 | 0.3151643 | 1.33E-05 |
| cg14287742 | chr1 | Open Sea    | 0.607210206 | 0.921705442 | 0.3144952 | 1.31E-07 |
| cg26153353 | chr1 | Open Sea    | 0.470293515 | 0.784611475 | 0.314318  | 0.003404 |
| cg14212967 | chr1 | Open Sea    | 0.388471232 | 0.702008924 | 0.3135377 | 2.58E-07 |
| cg05295584 | chr1 | Open Sea    | 0.561671323 | 0.874757553 | 0.3130862 | 4.27E-07 |
| cg06640374 | chr1 | Open Sea    | 0.523152506 | 0.833568145 | 0.3104156 | 0.022418 |
| cg06521247 | chr1 | Open Sea    | 0.615148719 | 0.92527028  | 0.3101216 | 3.11E-06 |

|            |      |             |             |             |           |          |
|------------|------|-------------|-------------|-------------|-----------|----------|
| cg23260554 | chr1 | Open Sea    | 0.406584223 | 0.716640681 | 0.3100565 | 2.68E-08 |
| cg04252762 | chr1 | South Shelf | 0.564173207 | 0.874135125 | 0.3099619 | 2.06E-06 |
| cg19411734 | chr1 | North Shelf | 0.508761428 | 0.81857757  | 0.3098161 | 2.37E-05 |
| cg11341981 | chr1 | North Shore | 0.315353725 | 0.624235301 | 0.3088816 | 0.037219 |
| cg26786407 | chr1 | Open Sea    | 0.539749394 | 0.847899451 | 0.3081501 | 0.003944 |
| cg07419921 | chr1 | North Shelf | 0.588394433 | 0.896434522 | 0.3080401 | 1.34E-05 |
| cg10310168 | chr1 | Open Sea    | 0.499787463 | 0.806974421 | 0.307187  | 6.89E-06 |
| cg06719042 | chr1 | Open Sea    | 0.411176554 | 0.717546219 | 0.3063697 | 0.010594 |
| cg00713435 | chr1 | Open Sea    | 0.604447573 | 0.909546904 | 0.3050993 | 4.56E-05 |
| cg06100240 | chr1 | Open Sea    | 0.537110258 | 0.841695312 | 0.3045851 | 0.036487 |
| cg16401668 | chr1 | Open Sea    | 0.507946757 | 0.812409616 | 0.3044629 | 7.84E-05 |
| cg24693760 | chr1 | Open Sea    | 0.274931716 | 0.57932143  | 0.3043897 | 2.7E-07  |
| cg13909533 | chr1 | Open Sea    | 0.480902882 | 0.785186558 | 0.3042837 | 0.041065 |
| cg05783585 | chr1 | Open Sea    | 0.543593613 | 0.847563932 | 0.3039703 | 7.66E-05 |
| cg11388664 | chr1 | North Shore | 0.560466297 | 0.864124088 | 0.3036578 | 0.000318 |
| cg23660927 | chr1 | North Shelf | 0.498699791 | 0.801266648 | 0.3025669 | 0.005422 |
| cg07417683 | chr1 | Open Sea    | 0.382438521 | 0.684567727 | 0.3021292 | 1.27E-06 |
| cg20966426 | chr1 | Open Sea    | 0.52028391  | 0.822263061 | 0.3019792 | 0.00749  |
| cg21576886 | chr1 | Open Sea    | 0.41822729  | 0.719842674 | 0.3016154 | 0.033565 |
| cg17518949 | chr1 | Open Sea    | 0.558923969 | 0.860461814 | 0.3015378 | 0.02291  |
| cg13434489 | chr1 | Open Sea    | 0.536501135 | 0.837482465 | 0.3009813 | 2.02E-05 |
| cg12220376 | chr1 | Open Sea    | 0.604934209 | 0.90582354  | 0.3008893 | 6.63E-05 |
| cg17412901 | chr1 | South Shore | 0.458024955 | 0.758696517 | 0.3006716 | 0.002379 |
| cg12804677 | chr1 | North Shore | 0.322372886 | 0.621561524 | 0.2991886 | 0.011197 |
| cg14043702 | chr1 | Open Sea    | 0.554484453 | 0.853610111 | 0.2991257 | 0.000301 |
| cg13410390 | chr1 | South Shore | 0.519344909 | 0.817758894 | 0.298414  | 0.038167 |
| cg15821544 | chr1 | South Shore | 0.576279109 | 0.874585657 | 0.2983065 | 1.31E-06 |
| cg06213763 | chr1 | Open Sea    | 0.282570449 | 0.58078782  | 0.2982174 | 0.041654 |
| cg01556552 | chr1 | North Shelf | 0.347902486 | 0.646010562 | 0.2981081 | 1.85E-05 |
| cg07420232 | chr1 | Open Sea    | 0.635361844 | 0.933097842 | 0.297736  | 1.65E-07 |
| cg26017484 | chr1 | Island      | 0.592453744 | 0.889820193 | 0.2973664 | 5.36E-06 |
| cg09992376 | chr1 | Open Sea    | 0.604445167 | 0.901724903 | 0.2972797 | 2.02E-05 |
| cg23228178 | chr1 | Open Sea    | 0.273838617 | 0.570181488 | 0.2963429 | 0.027487 |
| cg10391102 | chr1 | South Shore | 0.5881217   | 0.884121576 | 0.2959999 | 0.003051 |
| cg03448635 | chr1 | North Shore | 0.631443489 | 0.927096188 | 0.2956527 | 5.45E-05 |
| cg06436573 | chr1 | Open Sea    | 0.551769225 | 0.847122201 | 0.295353  | 0.002009 |
| cg07231911 | chr1 | Open Sea    | 0.526272606 | 0.821088129 | 0.2948155 | 1.94E-05 |
| cg14844953 | chr1 | Open Sea    | 0.571852702 | 0.866592959 | 0.2947403 | 1.27E-08 |
| cg17136275 | chr1 | Open Sea    | 0.336525134 | 0.631115859 | 0.2945907 | 1.76E-05 |
| cg08921300 | chr1 | Open Sea    | 0.56823033  | 0.862748968 | 0.2945186 | 0.002081 |
| cg13104257 | chr1 | North Shore | 0.449681065 | 0.744129117 | 0.2944481 | 0.047938 |
| cg17467525 | chr1 | North Shore | 0.314724945 | 0.608627359 | 0.2939024 | 0.000183 |
| cg03143457 | chr1 | Open Sea    | 0.52838463  | 0.821779669 | 0.293395  | 2.26E-05 |
| cg04078221 | chr1 | North Shore | 0.592735379 | 0.885841202 | 0.2931058 | 0.00095  |
| cg00355656 | chr1 | North Shore | 0.414262584 | 0.706651067 | 0.2923885 | 1.01E-06 |
| cg26904179 | chr1 | Open Sea    | 0.567238527 | 0.859213929 | 0.2919754 | 7.7E-05  |
| cg03937966 | chr1 | Island      | 0.473507652 | 0.765066565 | 0.2915589 | 2.78E-08 |
| cg12811284 | chr1 | Open Sea    | 0.343394134 | 0.634844084 | 0.2914499 | 0.008318 |
| cg19692782 | chr1 | Open Sea    | 0.416130374 | 0.706596558 | 0.2904662 | 0.001591 |
| cg11147878 | chr1 | Open Sea    | 0.565643661 | 0.855717775 | 0.2900741 | 4.43E-05 |

|            |      |             |             |             |           |          |
|------------|------|-------------|-------------|-------------|-----------|----------|
| cg10433805 | chr1 | South Shelf | 0.547622436 | 0.837666336 | 0.2900439 | 0.046246 |
| cg00706913 | chr1 | North Shore | 0.503167526 | 0.793092434 | 0.2899249 | 0.021021 |
| cg18770052 | chr1 | Open Sea    | 0.561426272 | 0.851028034 | 0.2896018 | 0.000258 |
| cg10444224 | chr1 | South Shelf | 0.520033755 | 0.80946927  | 0.2894355 | 0.013589 |
| cg21810793 | chr1 | South Shelf | 0.441919019 | 0.731110536 | 0.2891915 | 8.45E-08 |
| cg19704073 | chr1 | North Shore | 0.566733802 | 0.854951079 | 0.2882173 | 0.033444 |
| cg19825974 | chr1 | North Shore | 0.530192507 | 0.817911093 | 0.2877186 | 4.08E-08 |
| cg25939869 | chr1 | Open Sea    | 0.568813379 | 0.855528287 | 0.2867149 | 0.006932 |
| cg14731422 | chr1 | North Shore | 0.461642704 | 0.748296872 | 0.2866542 | 0.030821 |
| cg00030501 | chr1 | Open Sea    | 0.630533346 | 0.917168603 | 0.2866353 | 2.01E-05 |
| cg01093088 | chr1 | Open Sea    | 0.481033269 | 0.767649186 | 0.2866159 | 0.002663 |
| cg13216073 | chr1 | South Shore | 0.60220001  | 0.888679931 | 0.2864799 | 1.26E-05 |
| cg12524640 | chr1 | North Shore | 0.544780252 | 0.831257411 | 0.2864772 | 0.016766 |
| cg10516886 | chr1 | Open Sea    | 0.303741788 | 0.590012011 | 0.2862702 | 0.000893 |
| cg07974025 | chr1 | South Shelf | 0.563540661 | 0.849618746 | 0.2860781 | 1.01E-05 |
| cg22082456 | chr1 | North Shore | 0.554317289 | 0.840314085 | 0.2859968 | 2.93E-06 |
| cg00421541 | chr1 | North Shelf | 0.414324086 | 0.7001258   | 0.2858017 | 0.001202 |
| cg19402335 | chr1 | Open Sea    | 0.600765778 | 0.886506037 | 0.2857403 | 9.51E-05 |
| cg01343097 | chr1 | Open Sea    | 0.547954397 | 0.833548353 | 0.285594  | 3.22E-05 |
| cg10100287 | chr1 | North Shelf | 0.502358632 | 0.787912839 | 0.2855542 | 0.004216 |
| cg20994118 | chr1 | Open Sea    | 0.338398279 | 0.623479349 | 0.2850811 | 1.63E-07 |
| cg19939130 | chr1 | Open Sea    | 0.599038052 | 0.883873636 | 0.2848356 | 8.25E-05 |
| cg08786003 | chr1 | Open Sea    | 0.5089545   | 0.793138951 | 0.2841845 | 0.006969 |
| cg16572957 | chr1 | Open Sea    | 0.584904979 | 0.868703322 | 0.2837983 | 1.88E-06 |
| cg17514199 | chr1 | Open Sea    | 0.534044302 | 0.817840117 | 0.2837958 | 0.01807  |
| cg00251678 | chr1 | North Shore | 0.368811229 | 0.652380153 | 0.2835689 | 0.001164 |
| cg00958225 | chr1 | Open Sea    | 0.602082193 | 0.884925143 | 0.2828429 | 0.000819 |
| cg05349159 | chr1 | South Shore | 0.579738773 | 0.861570841 | 0.2818321 | 0.001724 |
| cg18876728 | chr1 | Open Sea    | 0.557150155 | 0.83721437  | 0.2800642 | 0.000162 |
| cg25286579 | chr1 | Open Sea    | 0.61280711  | 0.892842623 | 0.2800355 | 3.97E-05 |
| cg11735242 | chr1 | Open Sea    | 0.603781129 | 0.883129404 | 0.2793483 | 0.000298 |
| cg26933021 | chr1 | Open Sea    | 0.500786686 | 0.780117745 | 0.2793311 | 0.028782 |
| cg17104202 | chr1 | North Shore | 0.610477531 | 0.889733364 | 0.2792558 | 6.86E-05 |
| cg22671342 | chr1 | Open Sea    | 0.630660253 | 0.909406433 | 0.2787462 | 2.21E-05 |
| cg01789743 | chr1 | South Shelf | 0.521262425 | 0.799970193 | 0.2787078 | 0.001868 |
| cg05139571 | chr1 | Open Sea    | 0.574099081 | 0.851386348 | 0.2772873 | 1.2E-06  |
| cg26276249 | chr1 | Open Sea    | 0.628741641 | 0.905811492 | 0.2770699 | 6.74E-05 |
| cg01789501 | chr1 | Open Sea    | 0.432593462 | 0.709624155 | 0.2770307 | 4.47E-06 |
| cg24602245 | chr1 | South Shelf | 0.619324399 | 0.896271916 | 0.2769475 | 4.72E-07 |
| cg26044566 | chr1 | Open Sea    | 0.620725709 | 0.89705312  | 0.2763274 | 0.001732 |
| cg02835462 | chr1 | Open Sea    | 0.553782803 | 0.829955847 | 0.276173  | 0.03464  |
| cg26328954 | chr1 | South Shore | 0.566601667 | 0.842034399 | 0.2754327 | 0.010374 |
| cg02886578 | chr1 | Open Sea    | 0.395006183 | 0.670386811 | 0.2753806 | 6.65E-05 |
| cg22446206 | chr1 | Open Sea    | 0.317817815 | 0.593123278 | 0.2753055 | 0.026315 |
| cg01445399 | chr1 | North Shore | 0.598940733 | 0.873901934 | 0.2749612 | 0.003878 |
| cg03322779 | chr1 | Open Sea    | 0.499479573 | 0.774173795 | 0.2746942 | 1.22E-05 |
| cg26910384 | chr1 | South Shelf | 0.455730823 | 0.730023056 | 0.2742922 | 7.76E-07 |
| cg21208943 | chr1 | South Shore | 0.532178392 | 0.806241723 | 0.2740633 | 0.002383 |
| cg06961354 | chr1 | Open Sea    | 0.615517324 | 0.889263679 | 0.2737464 | 1.27E-05 |
| cg20290850 | chr1 | Open Sea    | 0.579160037 | 0.852466482 | 0.2733064 | 0.000347 |

|            |      |             |             |             |           |          |
|------------|------|-------------|-------------|-------------|-----------|----------|
| cg17455155 | chr1 | Island      | 0.485658564 | 0.758706194 | 0.2730476 | 0.005112 |
| cg14153654 | chr1 | North Shore | 0.213282259 | 0.48614637  | 0.2728641 | 0.000473 |
| cg08423575 | chr1 | Open Sea    | 0.638297117 | 0.910311661 | 0.2720145 | 4.93E-05 |
| cg16561256 | chr1 | South Shelf | 0.536455113 | 0.808355672 | 0.2719006 | 5.93E-08 |
| cg13799671 | chr1 | South Shelf | 0.606294371 | 0.87813095  | 0.2718366 | 0.015744 |
| cg24375626 | chr1 | Open Sea    | 0.554791628 | 0.826114981 | 0.2713234 | 0.001747 |
| cg08529269 | chr1 | Open Sea    | 0.497587184 | 0.768567615 | 0.2709804 | 1.37E-05 |
| cg25259754 | chr1 | Open Sea    | 0.364618259 | 0.635252546 | 0.2706343 | 1.89E-06 |
| cg24361198 | chr1 | Open Sea    | 0.636564065 | 0.907032945 | 0.2704689 | 0.000495 |
| cg17276450 | chr1 | Open Sea    | 0.606014079 | 0.876362239 | 0.2703482 | 0.001207 |
| cg12921481 | chr1 | Open Sea    | 0.577473481 | 0.847627846 | 0.2701544 | 0.00704  |
| cg03140624 | chr1 | Open Sea    | 0.630032121 | 0.898249232 | 0.2682171 | 1.55E-05 |
| cg25008504 | chr1 | Open Sea    | 0.388924047 | 0.657096915 | 0.2681729 | 0.006265 |
| cg23843022 | chr1 | Open Sea    | 0.601135774 | 0.869147252 | 0.2680115 | 0.022799 |
| cg08733933 | chr1 | Open Sea    | 0.502678711 | 0.770175397 | 0.2674967 | 2.2E-07  |
| cg25215194 | chr1 | South Shelf | 0.459619476 | 0.726996436 | 0.267377  | 0.005994 |
| cg04095498 | chr1 | Open Sea    | 0.614853361 | 0.882215807 | 0.2673624 | 0.011515 |
| cg13987606 | chr1 | South Shore | 0.555317157 | 0.822486584 | 0.2671694 | 0.044095 |
| cg02449975 | chr1 | South Shelf | 0.633090533 | 0.900037403 | 0.2669469 | 0.009863 |
| cg13394110 | chr1 | Open Sea    | 0.585838202 | 0.852697817 | 0.2668596 | 0.00205  |
| cg13471209 | chr1 | Open Sea    | 0.551360978 | 0.818075786 | 0.2667148 | 0.00017  |
| cg06041466 | chr1 | Open Sea    | 0.620600826 | 0.887015953 | 0.2664151 | 0.00164  |
| cg18231054 | chr1 | North Shore | 0.589862119 | 0.856210417 | 0.2663483 | 0.000566 |
| cg22037030 | chr1 | Open Sea    | 0.630581845 | 0.895841297 | 0.2652595 | 0.004192 |
| cg13897222 | chr1 | Open Sea    | 0.648951261 | 0.914049164 | 0.2650979 | 2.01E-06 |
| cg17025555 | chr1 | Open Sea    | 0.607641986 | 0.872250067 | 0.2646081 | 0.003502 |
| cg21785245 | chr1 | Open Sea    | 0.621317799 | 0.885822314 | 0.2645045 | 7.04E-05 |
| cg01071314 | chr1 | South Shelf | 0.658122156 | 0.922622705 | 0.2645005 | 8.63E-05 |
| cg13047196 | chr1 | Open Sea    | 0.584642332 | 0.849010862 | 0.2643685 | 1.87E-05 |
| cg26858300 | chr1 | Open Sea    | 0.592395679 | 0.856400825 | 0.2640051 | 0.000207 |
| cg18594482 | chr1 | North Shore | 0.623920631 | 0.887506531 | 0.2635859 | 4.27E-08 |
| cg09035152 | chr1 | Open Sea    | 0.583468016 | 0.846816004 | 0.263348  | 0.005944 |
| cg03065165 | chr1 | Open Sea    | 0.568891681 | 0.832109567 | 0.2632179 | 1.74E-05 |
| cg02338965 | chr1 | Open Sea    | 0.559554185 | 0.822150254 | 0.2625961 | 0.000268 |
| cg16122793 | chr1 | Open Sea    | 0.4413585   | 0.703604119 | 0.2622456 | 0.000626 |
| cg14696870 | chr1 | Open Sea    | 0.566128568 | 0.828168161 | 0.2620396 | 8.24E-05 |
| cg03513309 | chr1 | Open Sea    | 0.567790088 | 0.829362927 | 0.2615728 | 0.017796 |
| cg17824277 | chr1 | North Shore | 0.607632983 | 0.869182103 | 0.2615491 | 0.000561 |
| cg13923696 | chr1 | Island      | 0.663631118 | 0.92502716  | 0.261396  | 4.56E-05 |
| cg25541621 | chr1 | Open Sea    | 0.583864938 | 0.844359538 | 0.2604946 | 0.004783 |
| cg24307587 | chr1 | Open Sea    | 0.573345277 | 0.833127913 | 0.2597826 | 0.027553 |
| cg15211996 | chr1 | North Shore | 0.435886199 | 0.695609494 | 0.2597233 | 1.02E-05 |
| cg17514168 | chr1 | Open Sea    | 0.56362331  | 0.823244821 | 0.2596215 | 4.04E-05 |
| cg06836656 | chr1 | North Shore | 0.563562    | 0.823038779 | 0.2594768 | 0.002777 |
| cg16011217 | chr1 | Open Sea    | 0.569902235 | 0.829343112 | 0.2594409 | 0.032409 |
| cg01800445 | chr1 | Open Sea    | 0.626838279 | 0.885887735 | 0.2590495 | 0.024064 |
| cg02567289 | chr1 | South Shelf | 0.561852529 | 0.820865976 | 0.2590134 | 0.040477 |
| cg10586107 | chr1 | Open Sea    | 0.357969195 | 0.616231794 | 0.2582626 | 8.33E-05 |
| cg19272720 | chr1 | Open Sea    | 0.58779238  | 0.845838398 | 0.258046  | 0.0006   |
| cg05046722 | chr1 | Open Sea    | 0.418194887 | 0.6761687   | 0.2579738 | 6.36E-05 |

|            |      |             |             |             |           |          |
|------------|------|-------------|-------------|-------------|-----------|----------|
| cg06966242 | chr1 | Island      | 0.602987705 | 0.860902667 | 0.257915  | 0.000133 |
| cg18315861 | chr1 | Open Sea    | 0.472452004 | 0.729703258 | 0.2572513 | 0.028664 |
| cg18140889 | chr1 | Open Sea    | 0.282490685 | 0.539731339 | 0.2572407 | 0.008885 |
| cg14472778 | chr1 | South Shore | 0.652687048 | 0.909800769 | 0.2571137 | 2.64E-05 |
| cg09135754 | chr1 | Open Sea    | 0.550119487 | 0.806970825 | 0.2568513 | 1.16E-05 |
| cg17739643 | chr1 | Open Sea    | 0.595324291 | 0.852172777 | 0.2568485 | 0.005122 |
| cg17137218 | chr1 | Island      | 0.56949812  | 0.82611479  | 0.2566167 | 0.017888 |
| cg17167920 | chr1 | Open Sea    | 0.56004556  | 0.816132164 | 0.2560866 | 0.000102 |
| cg27632318 | chr1 | Open Sea    | 0.500860571 | 0.756761145 | 0.2559006 | 0.041621 |
| cg12525949 | chr1 | South Shore | 0.453027983 | 0.70854182  | 0.2555138 | 0.009889 |
| cg09416903 | chr1 | Open Sea    | 0.640107299 | 0.895571309 | 0.255464  | 0.001662 |
| cg16110704 | chr1 | South Shelf | 0.262058685 | 0.517402358 | 0.2553437 | 4.97E-06 |
| cg17277896 | chr1 | North Shore | 0.455260396 | 0.7105941   | 0.2553337 | 0.001527 |
| cg19404354 | chr1 | Open Sea    | 0.634856456 | 0.890102311 | 0.2552459 | 2.2E-05  |
| cg16035777 | chr1 | Open Sea    | 0.515130808 | 0.76988362  | 0.2547528 | 0.001807 |
| cg09586034 | chr1 | Open Sea    | 0.671292313 | 0.925822413 | 0.2545301 | 0.000278 |
| cg10511357 | chr1 | Open Sea    | 0.518876471 | 0.772714428 | 0.253838  | 0.002904 |
| cg10808936 | chr1 | Open Sea    | 0.632660537 | 0.886413264 | 0.2537527 | 7.76E-05 |
| cg13875033 | chr1 | North Shelf | 0.29084822  | 0.544596707 | 0.2537485 | 0.042679 |
| cg03938015 | chr1 | Island      | 0.622497218 | 0.875999441 | 0.2535022 | 0.008646 |
| cg16245868 | chr1 | Open Sea    | 0.629947296 | 0.883358046 | 0.2534107 | 3.83E-07 |
| cg27058889 | chr1 | South Shore | 0.558034421 | 0.81106871  | 0.2530343 | 0.011211 |
| cg08933467 | chr1 | Open Sea    | 0.271314471 | 0.524168039 | 0.2528536 | 0.024396 |
| cg08168529 | chr1 | Open Sea    | 0.628156551 | 0.880709583 | 0.252553  | 0.000177 |
| cg04781796 | chr1 | Island      | 0.622433587 | 0.874912728 | 0.2524791 | 0.001114 |
| cg08005208 | chr1 | South Shelf | 0.459360359 | 0.711730571 | 0.2523702 | 0.009838 |
| cg20978923 | chr1 | Open Sea    | 0.399315514 | 0.651136051 | 0.2518205 | 0.006355 |
| cg05352668 | chr1 | Open Sea    | 0.534846353 | 0.786514686 | 0.2516683 | 0.00441  |
| cg13100753 | chr1 | Open Sea    | 0.601032245 | 0.8523928   | 0.2513606 | 0.011115 |
| cg16046833 | chr1 | Open Sea    | 0.485098027 | 0.736418025 | 0.25132   | 0.037689 |
| cg04090867 | chr1 | Open Sea    | 0.563497953 | 0.814325187 | 0.2508272 | 0.048875 |
| cg19870706 | chr1 | Open Sea    | 0.589500962 | 0.84029604  | 0.2507951 | 0.045482 |
| cg25720825 | chr1 | North Shore | 0.429338906 | 0.679800272 | 0.2504614 | 0.000177 |
| cg01165362 | chr1 | Open Sea    | 0.522331443 | 0.772614223 | 0.2502828 | 8.59E-06 |
| cg06837040 | chr1 | Open Sea    | 0.52786316  | 0.777853462 | 0.2499903 | 0.000427 |
| cg05499890 | chr1 | Open Sea    | 0.569978044 | 0.819876647 | 0.2498986 | 0.004493 |
| cg01939443 | chr1 | Open Sea    | 0.618603902 | 0.868301116 | 0.2496972 | 0.000346 |
| cg11724759 | chr1 | Open Sea    | 0.619244772 | 0.867495826 | 0.2482511 | 0.028232 |
| cg21443133 | chr1 | Open Sea    | 0.59475295  | 0.842981672 | 0.2482287 | 1.5E-05  |
| cg06600287 | chr1 | South Shore | 0.535716124 | 0.783563079 | 0.247847  | 0.026831 |
| cg09448880 | chr1 | Open Sea    | 0.625783051 | 0.873537634 | 0.2477546 | 0.004116 |
| cg19243842 | chr1 | North Shore | 0.458184404 | 0.705536438 | 0.247352  | 0.006208 |
| cg02576892 | chr1 | South Shelf | 0.661351114 | 0.908530653 | 0.2471795 | 0.000834 |
| cg22163011 | chr1 | Open Sea    | 0.665089867 | 0.912266525 | 0.2471767 | 4.35E-05 |
| cg25603742 | chr1 | Open Sea    | 0.630018615 | 0.877109405 | 0.2470908 | 0.008425 |
| cg20274673 | chr1 | Open Sea    | 0.65113989  | 0.8977649   | 0.246625  | 0.000826 |
| cg02245566 | chr1 | Open Sea    | 0.585908793 | 0.832525032 | 0.2466162 | 0.000304 |
| cg25067373 | chr1 | Open Sea    | 0.613336237 | 0.859668353 | 0.2463321 | 0.000303 |
| cg05750926 | chr1 | Open Sea    | 0.582841106 | 0.829150649 | 0.2463095 | 1.21E-05 |
| cg22013370 | chr1 | Open Sea    | 0.544625748 | 0.790554792 | 0.245929  | 1.19E-05 |

|            |      |             |             |             |           |          |
|------------|------|-------------|-------------|-------------|-----------|----------|
| cg15557758 | chr1 | Open Sea    | 0.461844871 | 0.707418046 | 0.2455732 | 0.009877 |
| cg04295372 | chr1 | Open Sea    | 0.455733251 | 0.701232165 | 0.2454989 | 0.014234 |
| cg02736560 | chr1 | Open Sea    | 0.508451852 | 0.753901432 | 0.2454496 | 0.000579 |
| cg06346954 | chr1 | Open Sea    | 0.640202324 | 0.885517852 | 0.2453155 | 0.001656 |
| cg23658362 | chr1 | North Shore | 0.691193761 | 0.936458553 | 0.2452648 | 1.35E-05 |
| cg26337841 | chr1 | Open Sea    | 0.573057385 | 0.818222524 | 0.2451651 | 0.011241 |
| cg25729466 | chr1 | Open Sea    | 0.67644943  | 0.92158969  | 0.2451403 | 8.6E-05  |
| cg06711333 | chr1 | Open Sea    | 0.633696332 | 0.878511957 | 0.2448156 | 0.009568 |
| cg03528325 | chr1 | Open Sea    | 0.63905243  | 0.88376105  | 0.2447086 | 0.000153 |
| cg17440248 | chr1 | North Shore | 0.587481575 | 0.832038215 | 0.2445566 | 0.010332 |
| cg04239078 | chr1 | Open Sea    | 0.518155772 | 0.76244611  | 0.2442903 | 0.000825 |
| cg10228857 | chr1 | Open Sea    | 0.64459157  | 0.88867067  | 0.2440791 | 0.001041 |
| cg08865559 | chr1 | South Shore | 0.615649685 | 0.859593465 | 0.2439438 | 0.009297 |
| cg13397379 | chr1 | South Shelf | 0.600699019 | 0.844561998 | 0.243863  | 0.000384 |
| cg07837852 | chr1 | Open Sea    | 0.657623488 | 0.901230657 | 0.2436072 | 9.33E-05 |
| cg10100437 | chr1 | South Shelf | 0.509541791 | 0.753022089 | 0.2434803 | 0.031989 |
| cg10504805 | chr1 | Island      | 0.570611759 | 0.814035286 | 0.2434235 | 5.45E-07 |
| cg00804097 | chr1 | North Shore | 0.685768493 | 0.928599952 | 0.2428315 | 4.09E-06 |
| cg21221690 | chr1 | Open Sea    | 0.579166345 | 0.82131325  | 0.2421469 | 0.03565  |
| cg05712300 | chr1 | Open Sea    | 0.665971827 | 0.907845201 | 0.2418734 | 0.00013  |
| cg09473725 | chr1 | Open Sea    | 0.628952407 | 0.870708692 | 0.2417563 | 0.007611 |
| cg04899446 | chr1 | Open Sea    | 0.574293234 | 0.816030176 | 0.2417369 | 0.000136 |
| cg10701110 | chr1 | Open Sea    | 0.53220423  | 0.77376124  | 0.241557  | 4.75E-05 |
| cg16059167 | chr1 | Open Sea    | 0.564473328 | 0.805918521 | 0.2414452 | 0.009211 |
| cg21920303 | chr1 | Open Sea    | 0.49970024  | 0.740697552 | 0.2409973 | 0.020454 |
| cg15203632 | chr1 | Open Sea    | 0.680051869 | 0.920944228 | 0.2408924 | 0.000196 |
| cg00050294 | chr1 | Island      | 0.64944166  | 0.890220904 | 0.2407792 | 0.003542 |
| cg21167817 | chr1 | South Shelf | 0.713976205 | 0.954379024 | 0.2404028 | 5.81E-05 |
| cg13840174 | chr1 | South Shore | 0.402044081 | 0.642436049 | 0.240392  | 1.88E-05 |
| cg16596889 | chr1 | South Shore | 0.46074248  | 0.701100928 | 0.2403584 | 3.55E-05 |
| cg11174769 | chr1 | Open Sea    | 0.689098551 | 0.929116201 | 0.2400177 | 0.000209 |
| cg07363144 | chr1 | Open Sea    | 0.420523422 | 0.660432814 | 0.2399094 | 0.003663 |
| cg06177278 | chr1 | North Shore | 0.37624612  | 0.616096381 | 0.2398503 | 0.022679 |
| cg20849957 | chr1 | Open Sea    | 0.615714887 | 0.8555405   | 0.2398256 | 8.31E-05 |
| cg16576569 | chr1 | South Shelf | 0.64824549  | 0.887987402 | 0.2397419 | 0.000325 |
| cg23413307 | chr1 | Open Sea    | 0.573509728 | 0.813070081 | 0.2395604 | 0.002449 |
| cg15203777 | chr1 | North Shore | 0.492106723 | 0.731338428 | 0.2392317 | 0.004926 |
| cg18936620 | chr1 | North Shelf | 0.307012106 | 0.54586349  | 0.2388514 | 0.045477 |
| cg00119186 | chr1 | Open Sea    | 0.681028542 | 0.919850718 | 0.2388222 | 0.000449 |
| cg03106413 | chr1 | North Shore | 0.587114617 | 0.825706231 | 0.2385916 | 0.007442 |
| cg10556036 | chr1 | South Shore | 0.37478742  | 0.613016523 | 0.2382291 | 0.009391 |
| cg20932535 | chr1 | Open Sea    | 0.530523711 | 0.768582544 | 0.2380588 | 0.039578 |
| cg23962746 | chr1 | Open Sea    | 0.611530941 | 0.849296456 | 0.2377655 | 0.001085 |
| cg08244156 | chr1 | Open Sea    | 0.655629337 | 0.893260635 | 0.2376313 | 0.002495 |
| cg17286074 | chr1 | Open Sea    | 0.564808279 | 0.802391849 | 0.2375836 | 0.000161 |
| cg09174555 | chr1 | Open Sea    | 0.258854737 | 0.496392103 | 0.2375374 | 0.022357 |
| cg24312874 | chr1 | Open Sea    | 0.522962234 | 0.760370029 | 0.2374078 | 7.06E-05 |
| cg20320823 | chr1 | South Shelf | 0.636942776 | 0.874230914 | 0.2372881 | 0.003191 |
| cg12268236 | chr1 | Island      | 0.6576585   | 0.894747827 | 0.2370893 | 0.000165 |
| cg02328713 | chr1 | North Shore | 0.607821353 | 0.844790516 | 0.2369692 | 0.029312 |

|            |      |             |             |             |           |          |
|------------|------|-------------|-------------|-------------|-----------|----------|
| cg23254163 | chr1 | Open Sea    | 0.636678624 | 0.873517887 | 0.2368393 | 0.001558 |
| cg05922993 | chr1 | Open Sea    | 0.665829484 | 0.902666726 | 0.2368372 | 0.001643 |
| cg05198938 | chr1 | Open Sea    | 0.477445359 | 0.714244583 | 0.2367992 | 0.034048 |
| cg00168240 | chr1 | North Shelf | 0.638946852 | 0.875737598 | 0.2367907 | 1.01E-06 |
| cg08943293 | chr1 | North Shore | 0.511450795 | 0.748135749 | 0.236685  | 3.73E-05 |
| cg02920235 | chr1 | Open Sea    | 0.50691451  | 0.743098792 | 0.2361843 | 0.009705 |
| cg10039160 | chr1 | Open Sea    | 0.653034049 | 0.889062121 | 0.2360281 | 0.001224 |
| cg25840094 | chr1 | Open Sea    | 0.478789965 | 0.714617103 | 0.2358271 | 0.046079 |
| cg10573643 | chr1 | North Shore | 0.592242878 | 0.827926824 | 0.2356839 | 7.5E-05  |
| cg07099084 | chr1 | South Shore | 0.67363479  | 0.909135691 | 0.2355009 | 0.000241 |
| cg06201717 | chr1 | Open Sea    | 0.634451726 | 0.869708289 | 0.2352566 | 0.000763 |
| cg03580107 | chr1 | South Shelf | 0.49881299  | 0.734050777 | 0.2352378 | 4.52E-05 |
| cg09825327 | chr1 | South Shelf | 0.638143758 | 0.873344669 | 0.2352009 | 0.000244 |
| cg13056990 | chr1 | Open Sea    | 0.591141933 | 0.826079333 | 0.2349374 | 0.003358 |
| cg24809845 | chr1 | Open Sea    | 0.617873166 | 0.852758075 | 0.2348849 | 0.000992 |
| cg23887776 | chr1 | Island      | 0.649241251 | 0.884057423 | 0.2348162 | 0.000898 |
| cg20003179 | chr1 | Open Sea    | 0.577423697 | 0.812186039 | 0.2347623 | 0.000157 |
| cg07792636 | chr1 | South Shelf | 0.612561153 | 0.847255665 | 0.2346945 | 0.024445 |
| cg01443433 | chr1 | Open Sea    | 0.642649534 | 0.876865691 | 0.2342162 | 0.04837  |
| cg03548170 | chr1 | Open Sea    | 0.623610176 | 0.857407891 | 0.2337977 | 0.014627 |
| cg12045158 | chr1 | Open Sea    | 0.664044359 | 0.897837887 | 0.2337935 | 0.000172 |
| cg00849570 | chr1 | North Shore | 0.570295089 | 0.804068725 | 0.2337736 | 0.00566  |
| cg20676475 | chr1 | Open Sea    | 0.629460789 | 0.863045065 | 0.2335843 | 0.002029 |
| cg12176191 | chr1 | Open Sea    | 0.629455794 | 0.862861443 | 0.2334056 | 0.004964 |
| cg22610434 | chr1 | Open Sea    | 0.535027052 | 0.768368517 | 0.2333415 | 7.6E-06  |
| cg06712674 | chr1 | Open Sea    | 0.495326103 | 0.728306944 | 0.2329808 | 0.002391 |
| cg24150662 | chr1 | Open Sea    | 0.644353904 | 0.877193008 | 0.2328391 | 0.003189 |
| cg14420494 | chr1 | South Shore | 0.669209658 | 0.90201767  | 0.232808  | 0.001096 |
| cg16104276 | chr1 | North Shelf | 0.632903083 | 0.865607082 | 0.232704  | 0.000507 |
| cg22509057 | chr1 | Open Sea    | 0.640121806 | 0.872496377 | 0.2323746 | 0.00375  |
| cg00944580 | chr1 | Open Sea    | 0.407112932 | 0.639450718 | 0.2323378 | 0.046438 |
| cg06948937 | chr1 | North Shore | 0.644880032 | 0.877060764 | 0.2321807 | 2.49E-05 |
| cg19708201 | chr1 | Open Sea    | 0.631888915 | 0.864023262 | 0.2321343 | 0.000423 |
| cg15447913 | chr1 | Open Sea    | 0.639765851 | 0.87175778  | 0.2319919 | 0.000198 |
| cg14776910 | chr1 | South Shelf | 0.534938067 | 0.766880963 | 0.2319429 | 0.00271  |
| cg00954256 | chr1 | Open Sea    | 0.666867158 | 0.898743422 | 0.2318763 | 0.000433 |
| cg15571882 | chr1 | North Shore | 0.663096845 | 0.894769991 | 0.2316731 | 0.038388 |
| cg27442839 | chr1 | Open Sea    | 0.64966734  | 0.881290943 | 0.2316236 | 3.48E-05 |
| cg06348826 | chr1 | North Shelf | 0.579986198 | 0.811284543 | 0.2312983 | 0.00101  |
| cg03434085 | chr1 | South Shelf | 0.554904855 | 0.78605765  | 0.2311528 | 0.007051 |
| cg17987458 | chr1 | Open Sea    | 0.637756891 | 0.868095064 | 0.2303382 | 0.002863 |
| cg02103822 | chr1 | Open Sea    | 0.599957267 | 0.830154837 | 0.2301976 | 0.001937 |
| cg09509365 | chr1 | Open Sea    | 0.689782407 | 0.919642195 | 0.2298598 | 4.39E-07 |
| cg14255644 | chr1 | Island      | 0.35497088  | 0.584700604 | 0.2297297 | 2.43E-05 |
| cg11341440 | chr1 | Open Sea    | 0.616785798 | 0.846509577 | 0.2297238 | 9.42E-05 |
| cg21140628 | chr1 | Open Sea    | 0.580690777 | 0.810304535 | 0.2296138 | 0.001034 |
| cg09149672 | chr1 | Open Sea    | 0.653466879 | 0.883025076 | 0.2295582 | 0.002484 |
| cg19164761 | chr1 | Open Sea    | 0.523361674 | 0.752710125 | 0.2293485 | 0.000121 |
| cg18369654 | chr1 | South Shore | 0.666842017 | 0.895948879 | 0.2291069 | 0.004195 |
| cg14216734 | chr1 | Open Sea    | 0.64250855  | 0.871012003 | 0.2285035 | 0.000351 |



|            |      |             |             |             |           |          |
|------------|------|-------------|-------------|-------------|-----------|----------|
| cg22792177 | chr1 | Island      | 0.595974832 | 0.824237956 | 0.2282631 | 6.01E-05 |
| cg10626107 | chr1 | South Shelf | 0.592584198 | 0.820440296 | 0.2278561 | 0.000112 |
| cg23683497 | chr1 | Open Sea    | 0.53127425  | 0.758840709 | 0.2275665 | 0.000108 |
| cg22601108 | chr1 | Open Sea    | 0.571764396 | 0.799076307 | 0.2273119 | 0.00417  |
| cg01773689 | chr1 | Island      | 0.631271581 | 0.858078852 | 0.2268073 | 0.00104  |
| cg26413691 | chr1 | North Shelf | 0.508182346 | 0.734318163 | 0.2261358 | 0.002874 |
| cg12408250 | chr1 | Open Sea    | 0.659679683 | 0.885404814 | 0.2257251 | 5.14E-05 |
| cg14849855 | chr1 | Open Sea    | 0.606512061 | 0.8321376   | 0.2256255 | 0.042145 |
| cg27447254 | chr1 | Open Sea    | 0.631883109 | 0.857452567 | 0.2255695 | 0.003416 |
| cg09869595 | chr1 | Open Sea    | 0.656459679 | 0.881909303 | 0.2254496 | 0.005781 |
| cg02242572 | chr1 | North Shore | 0.554373444 | 0.779653833 | 0.2252804 | 0.004019 |
| cg01074356 | chr1 | North Shelf | 0.645678297 | 0.870623389 | 0.2249451 | 0.000436 |
| cg06318676 | chr1 | Open Sea    | 0.654370325 | 0.87918026  | 0.2248099 | 3.37E-05 |
| cg11837181 | chr1 | South Shore | 0.355092926 | 0.579749197 | 0.2246563 | 0.000105 |
| cg17504886 | chr1 | Open Sea    | 0.656827598 | 0.881364009 | 0.2245364 | 0.002143 |
| cg22428027 | chr1 | Open Sea    | 0.54542619  | 0.769744719 | 0.2243185 | 0.026774 |
| cg16926445 | chr1 | Open Sea    | 0.616959798 | 0.841257917 | 0.2242981 | 0.008773 |
| cg03514188 | chr1 | Open Sea    | 0.638702848 | 0.862883491 | 0.2241806 | 0.005791 |
| cg21267167 | chr1 | Open Sea    | 0.648787034 | 0.872592589 | 0.2238056 | 0.000766 |
| cg21312148 | chr1 | Open Sea    | 0.649772006 | 0.873429555 | 0.2236575 | 0.000934 |
| cg13490235 | chr1 | Open Sea    | 0.480795077 | 0.704439461 | 0.2236444 | 0.00942  |
| cg11726474 | chr1 | Open Sea    | 0.705887174 | 0.92946989  | 0.2235827 | 5.2E-05  |
| cg13689309 | chr1 | South Shelf | 0.668812049 | 0.892110549 | 0.2232985 | 0.001307 |
| cg01063509 | chr1 | Open Sea    | 0.533980711 | 0.756901    | 0.2229203 | 0.00276  |
| cg20165545 | chr1 | South Shore | 0.488838519 | 0.711501909 | 0.2226634 | 1.65E-05 |
| cg08542181 | chr1 | Open Sea    | 0.425643541 | 0.64819404  | 0.2225505 | 0.001534 |
| cg08919846 | chr1 | South Shore | 0.611718064 | 0.834161829 | 0.2224438 | 0.000366 |
| cg05229416 | chr1 | Island      | 0.618162077 | 0.840161913 | 0.2219998 | 0.045401 |
| cg10381153 | chr1 | Open Sea    | 0.679632547 | 0.901032515 | 0.2214    | 5.34E-05 |
| cg02487061 | chr1 | North Shelf | 0.642854096 | 0.864188528 | 0.2213344 | 0.000993 |
| cg08947445 | chr1 | Island      | 0.721985808 | 0.943248004 | 0.2212622 | 0.000124 |
| cg15231462 | chr1 | Open Sea    | 0.563857536 | 0.784635398 | 0.2207779 | 0.000756 |
| cg11585605 | chr1 | Open Sea    | 0.675982418 | 0.896748289 | 0.2207659 | 0.000222 |
| cg19863456 | chr1 | North Shelf | 0.57541259  | 0.79591414  | 0.2205016 | 0.011584 |
| cg02760152 | chr1 | North Shore | 0.54349132  | 0.763991231 | 0.2204999 | 8.52E-05 |
| cg07109490 | chr1 | Island      | 0.671445543 | 0.891632043 | 0.2201865 | 1.29E-05 |
| cg17483482 | chr1 | Open Sea    | 0.616767411 | 0.836778022 | 0.2200106 | 0.031498 |
| cg12096707 | chr1 | South Shore | 0.614630871 | 0.834017821 | 0.219387  | 0.001903 |
| cg07348418 | chr1 | Open Sea    | 0.63625993  | 0.855533619 | 0.2192737 | 3.52E-05 |
| cg22040158 | chr1 | South Shelf | 0.455535618 | 0.674802604 | 0.219267  | 0.027171 |
| cg01977798 | chr1 | Island      | 0.622969867 | 0.842071716 | 0.2191018 | 0.0031   |
| cg11520395 | chr1 | South Shore | 0.431155074 | 0.650149866 | 0.2189948 | 0.012766 |
| cg11585670 | chr1 | North Shelf | 0.673285933 | 0.892166247 | 0.2188803 | 0.002331 |
| cg07706695 | chr1 | Open Sea    | 0.687301705 | 0.906178787 | 0.2188771 | 0.000789 |
| cg11401908 | chr1 | Open Sea    | 0.640374155 | 0.859146585 | 0.2187724 | 8.59E-07 |
| cg05046721 | chr1 | Open Sea    | 0.68816659  | 0.90663196  | 0.2184654 | 0.000549 |
| cg00951310 | chr1 | North Shelf | 0.583830523 | 0.801936253 | 0.2181057 | 0.000346 |
| cg17108958 | chr1 | Open Sea    | 0.69984511  | 0.917613601 | 0.2177685 | 0.000598 |
| cg26313337 | chr1 | Open Sea    | 0.539545722 | 0.757222482 | 0.2176768 | 1.34E-05 |
| cg21012057 | chr1 | North Shelf | 0.659501953 | 0.876983324 | 0.2174814 | 3.54E-05 |

|            |      |             |             |             |           |          |
|------------|------|-------------|-------------|-------------|-----------|----------|
| cg05753486 | chr1 | Open Sea    | 0.690866814 | 0.908059205 | 0.2171924 | 0.00043  |
| cg20745381 | chr1 | Open Sea    | 0.158932874 | 0.376034502 | 0.2171016 | 7.66E-06 |
| cg15392364 | chr1 | Open Sea    | 0.675313815 | 0.892127998 | 0.2168142 | 0.01234  |
| cg23086176 | chr1 | North Shelf | 0.428795183 | 0.645593988 | 0.2167988 | 5.62E-05 |
| cg11793106 | chr1 | North Shelf | 0.598557938 | 0.814974026 | 0.2164161 | 0.002259 |
| cg24539090 | chr1 | Open Sea    | 0.686942979 | 0.903066858 | 0.2161239 | 0.002468 |
| cg09025393 | chr1 | South Shore | 0.280822387 | 0.496904032 | 0.2160816 | 1.84E-05 |
| cg25019567 | chr1 | Open Sea    | 0.705709127 | 0.921781826 | 0.2160727 | 0.000155 |
| cg25411239 | chr1 | Open Sea    | 0.692173626 | 0.90822711  | 0.2160535 | 0.000709 |
| cg01815536 | chr1 | Open Sea    | 0.696962963 | 0.912997071 | 0.2160341 | 0.000128 |
| cg06868481 | chr1 | South Shelf | 0.531111566 | 0.746937934 | 0.2158264 | 0.001905 |
| cg20013688 | chr1 | South Shelf | 0.662625186 | 0.878411458 | 0.2157863 | 0.002134 |
| cg00983803 | chr1 | Open Sea    | 0.647771421 | 0.863444803 | 0.2156734 | 0.019291 |
| cg25469314 | chr1 | Open Sea    | 0.67315404  | 0.888789965 | 0.2156359 | 2.66E-05 |
| cg02743632 | chr1 | North Shore | 0.591604228 | 0.807189761 | 0.2155855 | 0.000833 |
| cg07159802 | chr1 | Open Sea    | 0.666788886 | 0.882363653 | 0.2155748 | 0.000226 |
| cg14218629 | chr1 | North Shelf | 0.415432179 | 0.630867291 | 0.2154351 | 1.96E-05 |
| cg01550397 | chr1 | Open Sea    | 0.614996245 | 0.830167775 | 0.2151715 | 0.012105 |
| cg25388738 | chr1 | Open Sea    | 0.715832957 | 0.93090646  | 0.2150735 | 0.000919 |
| cg08238568 | chr1 | Open Sea    | 0.464198422 | 0.679146971 | 0.2149485 | 0.003579 |
| cg21952052 | chr1 | Open Sea    | 0.178065796 | 0.392757405 | 0.2146916 | 0.048157 |
| cg17890044 | chr1 | North Shelf | 0.640197669 | 0.854725129 | 0.2145275 | 0.000181 |
| cg04876124 | chr1 | North Shelf | 0.705733926 | 0.919406672 | 0.2136727 | 1.14E-05 |
| cg18318409 | chr1 | Open Sea    | 0.644251634 | 0.857862642 | 0.213611  | 0.001196 |
| cg18196709 | chr1 | Open Sea    | 0.641577884 | 0.854388172 | 0.2128103 | 0.005045 |
| cg14833337 | chr1 | Open Sea    | 0.66283685  | 0.875628069 | 0.2127912 | 0.002763 |
| cg14777634 | chr1 | Open Sea    | 0.656368292 | 0.869119608 | 0.2127513 | 0.001209 |
| cg17750109 | chr1 | Open Sea    | 0.57018655  | 0.782709637 | 0.2125231 | 0.036108 |
| cg04599612 | chr1 | Open Sea    | 0.630337861 | 0.842130188 | 0.2117923 | 0.035862 |
| cg23818827 | chr1 | Open Sea    | 0.687073466 | 0.898865197 | 0.2117917 | 0.002314 |
| cg01507200 | chr1 | Open Sea    | 0.700802249 | 0.912292019 | 0.2114898 | 0.001059 |
| cg18880500 | chr1 | North Shore | 0.718314023 | 0.929740263 | 0.2114262 | 0.000107 |
| cg03533858 | chr1 | South Shore | 0.566116621 | 0.777508469 | 0.2113918 | 0.003296 |
| cg17449759 | chr1 | Open Sea    | 0.612759105 | 0.824039476 | 0.2112804 | 0.045911 |
| cg04972930 | chr1 | Open Sea    | 0.699821536 | 0.910831102 | 0.2110096 | 0.000465 |
| cg13789673 | chr1 | Island      | 0.629537539 | 0.840496655 | 0.2109591 | 0.015978 |
| cg21293216 | chr1 | Open Sea    | 0.347201056 | 0.557985697 | 0.2107846 | 0.045541 |
| cg05366923 | chr1 | Open Sea    | 0.50889147  | 0.719605736 | 0.2107143 | 0.000933 |
| cg24145935 | chr1 | Open Sea    | 0.666215912 | 0.876901365 | 0.2106855 | 0.014004 |
| cg17466696 | chr1 | Open Sea    | 0.609707992 | 0.820132869 | 0.2104249 | 0.010369 |
| cg01562897 | chr1 | South Shore | 0.624426095 | 0.834734588 | 0.2103085 | 0.014173 |
| cg21837826 | chr1 | South Shelf | 0.447741125 | 0.657967558 | 0.2102264 | 0.041434 |
| cg12765549 | chr1 | Open Sea    | 0.6798265   | 0.890050538 | 0.210224  | 0.001102 |
| cg00954633 | chr1 | Open Sea    | 0.665646598 | 0.875846658 | 0.2102001 | 0.000405 |
| cg02855850 | chr1 | Open Sea    | 0.58424258  | 0.794380792 | 0.2101382 | 0.001305 |
| cg00003858 | chr1 | North Shelf | 0.648227693 | 0.858238085 | 0.2100104 | 0.006537 |
| cg04144606 | chr1 | Open Sea    | 0.671750062 | 0.881383409 | 0.2096333 | 0.012393 |
| cg00859330 | chr1 | South Shelf | 0.474006284 | 0.683359945 | 0.2093537 | 0.019827 |
| cg20410409 | chr1 | Open Sea    | 0.66242438  | 0.871688437 | 0.2092641 | 0.009964 |
| cg11388802 | chr1 | Open Sea    | 0.647026211 | 0.856108522 | 0.2090823 | 0.031113 |

|            |      |             |             |             |           |          |
|------------|------|-------------|-------------|-------------|-----------|----------|
| cg26798702 | chr1 | North Shore | 0.637309125 | 0.846369348 | 0.2090602 | 7.85E-06 |
| cg09221035 | chr1 | South Shore | 0.6267467   | 0.835607391 | 0.2088607 | 0.041977 |
| cg08529744 | chr1 | Open Sea    | 0.279410309 | 0.488202057 | 0.2087917 | 0.020362 |
| cg23219336 | chr1 | Open Sea    | 0.676580004 | 0.885229395 | 0.2086494 | 0.0013   |
| cg22451632 | chr1 | Open Sea    | 0.551848594 | 0.760240447 | 0.2083919 | 0.000596 |
| cg01971120 | chr1 | Open Sea    | 0.697312742 | 0.905620191 | 0.2083074 | 0.002206 |
| cg16895814 | chr1 | North Shelf | 0.487352311 | 0.69546246  | 0.2081101 | 0.000658 |
| cg21813377 | chr1 | Island      | 0.56090659  | 0.768981163 | 0.2080746 | 0.006737 |
| cg03053290 | chr1 | North Shore | 0.688929384 | 0.896969539 | 0.2080402 | 0.000345 |
| cg06275635 | chr1 | Open Sea    | 0.53387709  | 0.74175287  | 0.2078758 | 0.015098 |
| cg00716660 | chr1 | North Shore | 0.626733961 | 0.834096757 | 0.2073628 | 0.00066  |
| cg09154062 | chr1 | Open Sea    | 0.448209222 | 0.655235027 | 0.2070258 | 6.95E-05 |
| cg20245116 | chr1 | Open Sea    | 0.659900283 | 0.866760364 | 0.2068601 | 0.037316 |
| cg16814688 | chr1 | Open Sea    | 0.566350797 | 0.772922253 | 0.2065715 | 0.022358 |
| cg10975391 | chr1 | Open Sea    | 0.611297818 | 0.81769875  | 0.2064009 | 0.007474 |
| cg03328107 | chr1 | Open Sea    | 0.662821249 | 0.869091191 | 0.2062699 | 1.8E-05  |
| cg16524818 | chr1 | Open Sea    | 0.693620742 | 0.899869059 | 0.2062483 | 0.001116 |
| cg09256413 | chr1 | Open Sea    | 0.679090325 | 0.88501685  | 0.2059265 | 7.59E-05 |
| cg01364826 | chr1 | Open Sea    | 0.579231737 | 0.78514689  | 0.2059152 | 0.00467  |
| cg24678869 | chr1 | South Shore | 0.513539852 | 0.719159161 | 0.2056193 | 0.044627 |
| cg26513818 | chr1 | North Shelf | 0.492038976 | 0.697502703 | 0.2054637 | 0.013997 |
| cg24719489 | chr1 | Open Sea    | 0.600859791 | 0.806265892 | 0.2054061 | 0.001347 |
| cg22367631 | chr1 | North Shore | 0.271856746 | 0.477155482 | 0.2052987 | 0.041823 |
| cg26910132 | chr1 | Open Sea    | 0.654161818 | 0.859411048 | 0.2052492 | 0.005674 |
| cg26060667 | chr1 | North Shore | 0.466842614 | 0.671651749 | 0.2048091 | 0.030495 |
| cg00379090 | chr1 | South Shore | 0.595930405 | 0.800721514 | 0.2047911 | 0.007075 |
| cg06951112 | chr1 | North Shelf | 0.482331307 | 0.687073063 | 0.2047418 | 0.000154 |
| cg24411075 | chr1 | North Shore | 0.692387553 | 0.896982624 | 0.2045951 | 0.000934 |
| cg02079463 | chr1 | Open Sea    | 0.692087086 | 0.896621704 | 0.2045346 | 0.003263 |
| cg08242576 | chr1 | Open Sea    | 0.666509862 | 0.870960015 | 0.2044502 | 0.001025 |
| cg21159274 | chr1 | South Shore | 0.704077633 | 0.908293097 | 0.2042155 | 0.000703 |
| cg20570030 | chr1 | South Shelf | 0.62237927  | 0.825835585 | 0.2034563 | 0.027616 |
| cg12636785 | chr1 | North Shelf | 0.360379524 | 0.563818416 | 0.2034389 | 0.000603 |
| cg25783497 | chr1 | Island      | 0.680303472 | 0.883696088 | 0.2033926 | 0.014417 |
| cg21912203 | chr1 | Open Sea    | 0.649290336 | 0.852403492 | 0.2031132 | 0.009771 |
| cg14826683 | chr1 | Open Sea    | 0.706938136 | 0.910044983 | 0.2031068 | 0.004962 |
| cg14838566 | chr1 | Open Sea    | 0.649947817 | 0.852884175 | 0.2029364 | 0.001149 |
| cg13058453 | chr1 | Open Sea    | 0.46090617  | 0.663787125 | 0.202881  | 0.008967 |
| cg10521808 | chr1 | Open Sea    | 0.711987223 | 0.914707426 | 0.2027202 | 0.002766 |
| cg15642933 | chr1 | North Shelf | 0.6969349   | 0.899159883 | 0.202225  | 0.001615 |
| cg02913918 | chr1 | Island      | 0.724874111 | 0.926850727 | 0.2019766 | 0.000591 |
| cg06970571 | chr1 | Open Sea    | 0.666669987 | 0.868558796 | 0.2018888 | 0.000669 |
| cg04198912 | chr1 | North Shore | 0.562050562 | 0.763773332 | 0.2017228 | 0.008635 |
| cg26605712 | chr1 | Open Sea    | 0.710441769 | 0.911610478 | 0.2011687 | 0.003174 |
| cg18268488 | chr1 | Open Sea    | 0.687882083 | 0.888981239 | 0.2010992 | 0.000849 |
| cg27053493 | chr1 | Open Sea    | 0.685736387 | 0.88649844  | 0.2007621 | 0.003995 |
| cg15641565 | chr1 | North Shelf | 0.63490423  | 0.835661017 | 0.2007568 | 0.008798 |
| cg22389654 | chr1 | Open Sea    | 0.700471487 | 0.901223248 | 0.2007518 | 0.020276 |
| cg22379576 | chr1 | North Shelf | 0.688343102 | 0.88891197  | 0.2005689 | 0.000171 |
| cg01019262 | chr1 | North Shelf | 0.638113621 | 0.838602665 | 0.200489  | 0.034004 |

|            |       |             |             |             |           |          |
|------------|-------|-------------|-------------|-------------|-----------|----------|
| cg04489573 | chr1  | Open Sea    | 0.678717248 | 0.879048906 | 0.2003317 | 0.000335 |
| cg13209335 | chr1  | North Shelf | 0.695971036 | 0.896254882 | 0.2002838 | 3.46E-05 |
| cg17136696 | chr1  | North Shelf | 0.704746752 | 0.904808192 | 0.2000614 | 0.00021  |
| cg27320518 | chr10 | Open Sea    | 0.38959644  | 0.840805359 | 0.4512089 | 0.006456 |
| cg15342452 | chr10 | Open Sea    | 0.396745098 | 0.83581972  | 0.4390746 | 3.59E-05 |
| cg06188083 | chr10 | Open Sea    | 0.373209484 | 0.805693592 | 0.4324841 | 0.036072 |
| cg06532387 | chr10 | Open Sea    | 0.521501777 | 0.938639943 | 0.4171382 | 4.27E-09 |
| cg24672116 | chr10 | Open Sea    | 0.47623931  | 0.89276372  | 0.4165244 | 7.95E-10 |
| cg13695746 | chr10 | Open Sea    | 0.457066883 | 0.861195414 | 0.4041285 | 5.38E-10 |
| cg12108265 | chr10 | North Shelf | 0.503518371 | 0.904034589 | 0.4005162 | 1.81E-09 |
| cg04683516 | chr10 | Open Sea    | 0.369600059 | 0.764566523 | 0.3949665 | 0.027677 |
| cg13382516 | chr10 | Open Sea    | 0.481404428 | 0.869932769 | 0.3885283 | 9.01E-09 |
| cg02684562 | chr10 | Open Sea    | 0.251837157 | 0.630107689 | 0.3782705 | 0.041064 |
| cg04716580 | chr10 | North Shelf | 0.573597777 | 0.946904001 | 0.3733062 | 2.29E-13 |
| cg03379552 | chr10 | Open Sea    | 0.400369891 | 0.769792608 | 0.3694227 | 0.018042 |
| cg11601663 | chr10 | Open Sea    | 0.412320528 | 0.778165259 | 0.3658447 | 0.023118 |
| cg26261270 | chr10 | Open Sea    | 0.510691329 | 0.87619511  | 0.3655038 | 0.00477  |
| cg26002370 | chr10 | Open Sea    | 0.51286518  | 0.85838267  | 0.3455175 | 0.004584 |
| cg23397013 | chr10 | Open Sea    | 0.453705069 | 0.797502792 | 0.3437977 | 7.13E-08 |
| cg27009448 | chr10 | Open Sea    | 0.598459237 | 0.938994308 | 0.3405351 | 6.31E-07 |
| cg18531916 | chr10 | Open Sea    | 0.486717839 | 0.82312264  | 0.3364048 | 4.96E-05 |
| cg04037905 | chr10 | North Shelf | 0.593296756 | 0.926460408 | 0.3331637 | 1.75E-07 |
| cg16132139 | chr10 | North Shore | 0.541660325 | 0.874807537 | 0.3331472 | 2.51E-05 |
| cg09357462 | chr10 | South Shore | 0.391351748 | 0.722290073 | 0.3309383 | 0.001061 |
| cg26426690 | chr10 | Open Sea    | 0.298587434 | 0.627737415 | 0.32915   | 3.56E-07 |
| cg23621929 | chr10 | Open Sea    | 0.585589373 | 0.913582054 | 0.3279927 | 1.67E-08 |
| cg17713910 | chr10 | Open Sea    | 0.461645511 | 0.789341885 | 0.3276964 | 0.002794 |
| cg06474179 | chr10 | Open Sea    | 0.554876827 | 0.880930517 | 0.3260537 | 2.31E-07 |
| cg19700682 | chr10 | South Shelf | 0.427046092 | 0.753000807 | 0.3259547 | 0.008219 |
| cg09863094 | chr10 | North Shelf | 0.597260669 | 0.919998082 | 0.3227374 | 4.19E-09 |
| cg01300641 | chr10 | Open Sea    | 0.511662655 | 0.829203444 | 0.3175408 | 0.000463 |
| cg27394794 | chr10 | Open Sea    | 0.39808935  | 0.715364504 | 0.3172752 | 0.009775 |
| cg19817126 | chr10 | Open Sea    | 0.527957746 | 0.845217914 | 0.3172602 | 5.47E-06 |
| cg15583029 | chr10 | Open Sea    | 0.350958101 | 0.663736706 | 0.3127786 | 0.019986 |
| cg18325866 | chr10 | South Shelf | 0.490880266 | 0.80190665  | 0.3110264 | 3.58E-06 |
| cg12756527 | chr10 | Open Sea    | 0.522525649 | 0.832045742 | 0.3095201 | 9.26E-06 |
| cg10376731 | chr10 | North Shore | 0.638950931 | 0.946966207 | 0.3080153 | 3.48E-06 |
| cg21364615 | chr10 | South Shelf | 0.56825307  | 0.874372716 | 0.3061196 | 9.89E-06 |
| cg09355528 | chr10 | Open Sea    | 0.363345587 | 0.663249833 | 0.2999042 | 8.75E-05 |
| cg15462970 | chr10 | Open Sea    | 0.500150032 | 0.796102067 | 0.295952  | 0.01771  |
| cg27270412 | chr10 | North Shore | 0.520124174 | 0.815096638 | 0.2949725 | 0.041768 |
| cg13610622 | chr10 | North Shore | 0.588553167 | 0.882854813 | 0.2943016 | 0.000158 |
| cg11344164 | chr10 | South Shelf | 0.414531439 | 0.708253611 | 0.2937222 | 0.033063 |
| cg20093139 | chr10 | Open Sea    | 0.517395651 | 0.809457464 | 0.2920618 | 0.025456 |
| cg05489054 | chr10 | Open Sea    | 0.511590313 | 0.803580044 | 0.2919897 | 2.02E-06 |
| cg04481603 | chr10 | South Shore | 0.306143873 | 0.596318855 | 0.290175  | 0.007805 |
| cg18426908 | chr10 | Open Sea    | 0.609599009 | 0.898938475 | 0.2893395 | 9.13E-07 |
| cg00464520 | chr10 | South Shelf | 0.472516321 | 0.761548242 | 0.2890319 | 0.006938 |
| cg14236430 | chr10 | Open Sea    | 0.613318912 | 0.902204862 | 0.288886  | 3.59E-06 |
| cg26869417 | chr10 | Open Sea    | 0.521595235 | 0.809229099 | 0.2876339 | 9.07E-06 |

|            |       |             |             |             |           |          |
|------------|-------|-------------|-------------|-------------|-----------|----------|
| cg19860121 | chr10 | Open Sea    | 0.604088242 | 0.891156873 | 0.2870686 | 0.017202 |
| cg23720528 | chr10 | Open Sea    | 0.621887369 | 0.908917031 | 0.2870297 | 8.73E-07 |
| cg09352815 | chr10 | North Shore | 0.611695815 | 0.895258427 | 0.2835626 | 6.14E-06 |
| cg19090784 | chr10 | North Shore | 0.590426518 | 0.873072495 | 0.282646  | 4.9E-05  |
| cg18061319 | chr10 | North Shore | 0.558145878 | 0.839824889 | 0.281679  | 5.98E-09 |
| cg14539856 | chr10 | Open Sea    | 0.413378637 | 0.693879072 | 0.2805004 | 0.001541 |
| cg20200460 | chr10 | Open Sea    | 0.449233296 | 0.728357102 | 0.2791238 | 5.81E-05 |
| cg03631457 | chr10 | Open Sea    | 0.465553826 | 0.743917044 | 0.2783632 | 0.028761 |
| cg02350790 | chr10 | Open Sea    | 0.574288936 | 0.851216056 | 0.2769271 | 0.002698 |
| cg13799081 | chr10 | Open Sea    | 0.518891473 | 0.795572413 | 0.2766809 | 0.041914 |
| cg01042100 | chr10 | South Shelf | 0.510500669 | 0.786024355 | 0.2755237 | 0.002894 |
| cg16123687 | chr10 | Open Sea    | 0.672495346 | 0.947202961 | 0.2747076 | 3.31E-05 |
| cg23640411 | chr10 | South Shelf | 0.604644763 | 0.879199619 | 0.2745549 | 4.68E-05 |
| cg08489478 | chr10 | South Shelf | 0.641513439 | 0.914948094 | 0.2734347 | 0.000167 |
| cg15480200 | chr10 | Open Sea    | 0.570366317 | 0.842846595 | 0.2724803 | 0.008092 |
| cg14015765 | chr10 | Open Sea    | 0.272550187 | 0.544785944 | 0.2722358 | 0.014956 |
| cg19253850 | chr10 | Open Sea    | 0.540341525 | 0.811750831 | 0.2714093 | 0.001268 |
| cg00241002 | chr10 | Open Sea    | 0.301142139 | 0.571413895 | 0.2702718 | 0.004695 |
| cg05759948 | chr10 | Open Sea    | 0.478869688 | 0.747442516 | 0.2685728 | 6.84E-05 |
| cg26094484 | chr10 | South Shore | 0.468042123 | 0.736050374 | 0.2680083 | 0.000237 |
| cg24385652 | chr10 | Open Sea    | 0.469947754 | 0.736433397 | 0.2664856 | 0.002641 |
| cg24110396 | chr10 | Open Sea    | 0.358224322 | 0.622543061 | 0.2643187 | 0.019818 |
| cg14218275 | chr10 | Open Sea    | 0.655615582 | 0.919630826 | 0.2640152 | 0.000336 |
| cg16794749 | chr10 | North Shelf | 0.626592652 | 0.889399898 | 0.2628072 | 3.08E-05 |
| cg06431514 | chr10 | Open Sea    | 0.588324244 | 0.850720346 | 0.2623961 | 0.003756 |
| cg19024161 | chr10 | Open Sea    | 0.562128443 | 0.82406166  | 0.2619332 | 0.001802 |
| cg05755354 | chr10 | Open Sea    | 0.59757451  | 0.859318123 | 0.2617436 | 0.013023 |
| cg04549524 | chr10 | Open Sea    | 0.489169952 | 0.74983564  | 0.2606657 | 1.24E-05 |
| cg20094831 | chr10 | North Shelf | 0.581075795 | 0.841291844 | 0.260216  | 0.000197 |
| cg09647352 | chr10 | Open Sea    | 0.662998945 | 0.923135921 | 0.260137  | 8.17E-05 |
| cg09501025 | chr10 | Open Sea    | 0.645238029 | 0.905169212 | 0.2599312 | 0.000305 |
| cg03308038 | chr10 | Open Sea    | 0.558507302 | 0.818409223 | 0.2599019 | 0.00116  |
| cg19635695 | chr10 | Open Sea    | 0.560687259 | 0.820208638 | 0.2595214 | 0.010991 |
| cg23725924 | chr10 | Open Sea    | 0.504454987 | 0.763264026 | 0.258809  | 0.00406  |
| cg26028149 | chr10 | South Shelf | 0.601112426 | 0.859667085 | 0.2585547 | 0.000364 |
| cg17402103 | chr10 | Open Sea    | 0.596933873 | 0.85362387  | 0.25669   | 0.002094 |
| cg11397476 | chr10 | Open Sea    | 0.593421015 | 0.849198213 | 0.2557772 | 8.99E-05 |
| cg23322812 | chr10 | South Shore | 0.63945139  | 0.894410495 | 0.2549591 | 5.79E-05 |
| cg03628800 | chr10 | North Shelf | 0.442683501 | 0.696439435 | 0.2537559 | 3.99E-06 |
| cg06511701 | chr10 | Open Sea    | 0.585272109 | 0.838545828 | 0.2532737 | 0.001414 |
| cg14120919 | chr10 | Open Sea    | 0.284484384 | 0.53761758  | 0.2531332 | 8.91E-08 |
| cg11608646 | chr10 | Island      | 0.64335237  | 0.896287637 | 0.2529353 | 0.000433 |
| cg00936935 | chr10 | Open Sea    | 0.652834589 | 0.905491895 | 0.2526573 | 0.000101 |
| cg14338073 | chr10 | Open Sea    | 0.590083559 | 0.842605321 | 0.2525218 | 0.008962 |
| cg05208747 | chr10 | North Shelf | 0.542877188 | 0.794950034 | 0.2520728 | 0.000175 |
| cg16624994 | chr10 | Open Sea    | 0.61196898  | 0.863331835 | 0.2513629 | 0.000146 |
| cg24201941 | chr10 | Open Sea    | 0.488095491 | 0.738890232 | 0.2507947 | 2.74E-05 |
| cg06740578 | chr10 | Open Sea    | 0.582187305 | 0.832831821 | 0.2506445 | 0.042848 |
| cg06417385 | chr10 | Open Sea    | 0.532969476 | 0.783084209 | 0.2501147 | 2.85E-05 |
| cg04625975 | chr10 | Open Sea    | 0.514240837 | 0.762912296 | 0.2486715 | 0.000107 |

|            |       |             |             |             |           |          |
|------------|-------|-------------|-------------|-------------|-----------|----------|
| cg00538888 | chr10 | North Shelf | 0.664698094 | 0.912817423 | 0.2481193 | 0.000832 |
| cg12167057 | chr10 | Open Sea    | 0.591891425 | 0.839743796 | 0.2478524 | 0.00105  |
| cg08457332 | chr10 | South Shelf | 0.664175599 | 0.911531715 | 0.2473561 | 8.14E-05 |
| cg00088504 | chr10 | Open Sea    | 0.624359115 | 0.871464873 | 0.2471058 | 0.00092  |
| cg18456331 | chr10 | North Shelf | 0.607310716 | 0.854371512 | 0.2470608 | 0.000304 |
| cg20345915 | chr10 | Open Sea    | 0.577067959 | 0.823343804 | 0.2462758 | 4.68E-05 |
| cg25403283 | chr10 | Open Sea    | 0.680367636 | 0.926211542 | 0.2458439 | 0.00021  |
| cg11002119 | chr10 | Open Sea    | 0.598384512 | 0.843942965 | 0.2455585 | 0.004423 |
| cg24647506 | chr10 | Open Sea    | 0.564555292 | 0.809934917 | 0.2453796 | 0.000468 |
| cg23900225 | chr10 | North Shelf | 0.609398719 | 0.854062566 | 0.2446638 | 0.020726 |
| cg05787063 | chr10 | Open Sea    | 0.606154648 | 0.850612716 | 0.2444581 | 0.004639 |
| cg20681321 | chr10 | Open Sea    | 0.68930759  | 0.933738668 | 0.2444311 | 0.000505 |
| cg02542748 | chr10 | Open Sea    | 0.654004782 | 0.897829474 | 0.2438247 | 0.009751 |
| cg17833578 | chr10 | Open Sea    | 0.561722817 | 0.804960987 | 0.2432382 | 0.015296 |
| cg17689601 | chr10 | Open Sea    | 0.656811799 | 0.899902795 | 0.243091  | 0.000141 |
| cg11181587 | chr10 | South Shore | 0.519451844 | 0.762255251 | 0.2428034 | 0.015031 |
| cg27009439 | chr10 | Open Sea    | 0.588300962 | 0.83103861  | 0.2427376 | 0.001592 |
| cg03478630 | chr10 | Open Sea    | 0.525269318 | 0.766747675 | 0.2414784 | 0.042154 |
| cg23631669 | chr10 | Open Sea    | 0.561858666 | 0.801657667 | 0.239799  | 0.004529 |
| cg11136386 | chr10 | North Shelf | 0.639574914 | 0.878587728 | 0.2390128 | 0.017694 |
| cg09859564 | chr10 | Open Sea    | 0.612866578 | 0.851343626 | 0.238477  | 1.85E-05 |
| cg15186969 | chr10 | South Shelf | 0.631756967 | 0.869986569 | 0.2382296 | 0.001476 |
| cg04850779 | chr10 | Open Sea    | 0.607096598 | 0.844165278 | 0.2370687 | 8.7E-05  |
| cg06374610 | chr10 | Open Sea    | 0.463740636 | 0.700760572 | 0.2370199 | 0.036593 |
| cg08598287 | chr10 | North Shore | 0.549612208 | 0.785724747 | 0.2361125 | 0.000905 |
| cg08907956 | chr10 | South Shore | 0.563458185 | 0.799045746 | 0.2355876 | 0.017803 |
| cg04103847 | chr10 | Open Sea    | 0.472758388 | 0.708061065 | 0.2353027 | 0.0003   |
| cg15910307 | chr10 | South Shore | 0.562268801 | 0.795676102 | 0.2334073 | 0.001084 |
| cg07877987 | chr10 | Open Sea    | 0.564036418 | 0.796394944 | 0.2323585 | 0.007911 |
| cg07694404 | chr10 | Open Sea    | 0.679167546 | 0.911158786 | 0.2319912 | 0.043725 |
| cg12743419 | chr10 | Open Sea    | 0.503870504 | 0.73561546  | 0.231745  | 5.41E-05 |
| cg05951296 | chr10 | Open Sea    | 0.643154555 | 0.874766317 | 0.2316118 | 0.01681  |
| cg12799846 | chr10 | South Shelf | 0.619854934 | 0.850919719 | 0.2310648 | 0.00699  |
| cg09155024 | chr10 | Open Sea    | 0.618541897 | 0.849293972 | 0.2307521 | 0.000126 |
| cg06787206 | chr10 | Open Sea    | 0.495575826 | 0.72541853  | 0.2298427 | 0.000734 |
| cg08993079 | chr10 | Open Sea    | 0.653936117 | 0.883716791 | 0.2297807 | 0.015025 |
| cg02132307 | chr10 | Open Sea    | 0.526226172 | 0.755369986 | 0.2291438 | 2.04E-06 |
| cg16792160 | chr10 | Open Sea    | 0.554234914 | 0.783337437 | 0.2291025 | 0.001615 |
| cg00495658 | chr10 | South Shelf | 0.454682606 | 0.683034212 | 0.2283516 | 1.89E-05 |
| cg25144149 | chr10 | North Shore | 0.451244144 | 0.679548754 | 0.2283046 | 0.00292  |
| cg11447573 | chr10 | Open Sea    | 0.582784307 | 0.811006852 | 0.2282225 | 3.44E-05 |
| cg26017408 | chr10 | North Shelf | 0.661486619 | 0.889695948 | 0.2282093 | 0.002947 |
| cg12589188 | chr10 | North Shelf | 0.500437529 | 0.728468032 | 0.2280305 | 0.000447 |
| cg05131347 | chr10 | North Shelf | 0.645607349 | 0.873424228 | 0.2278169 | 0.000279 |
| cg05021029 | chr10 | Open Sea    | 0.60615477  | 0.833623255 | 0.2274685 | 0.000815 |
| cg02878385 | chr10 | Open Sea    | 0.630853219 | 0.858111641 | 0.2272584 | 0.000277 |
| cg18433009 | chr10 | North Shore | 0.635661094 | 0.862888165 | 0.2272271 | 0.024842 |
| cg05162358 | chr10 | Open Sea    | 0.675230234 | 0.901325642 | 0.2260954 | 0.000195 |
| cg17373022 | chr10 | Open Sea    | 0.537171417 | 0.763222731 | 0.2260513 | 0.002959 |
| cg00748911 | chr10 | Open Sea    | 0.635250582 | 0.861241671 | 0.2259911 | 3.71E-05 |

|            |       |             |             |             |           |          |
|------------|-------|-------------|-------------|-------------|-----------|----------|
| cg12793525 | chr10 | North Shelf | 0.589431557 | 0.815229627 | 0.2257981 | 0.027875 |
| cg00956114 | chr10 | South Shelf | 0.67768822  | 0.902991116 | 0.2253029 | 5.09E-05 |
| cg09925467 | chr10 | Open Sea    | 0.61762229  | 0.841642801 | 0.2240205 | 0.03311  |
| cg09639430 | chr10 | Island      | 0.418996438 | 0.642713085 | 0.2237166 | 0.002357 |
| cg11635029 | chr10 | Open Sea    | 0.664622817 | 0.888141267 | 0.2235184 | 0.03544  |
| cg15650161 | chr10 | Open Sea    | 0.576402906 | 0.798734574 | 0.2223317 | 0.001722 |
| cg04752992 | chr10 | Open Sea    | 0.713216927 | 0.935148684 | 0.2219318 | 0.000159 |
| cg10821813 | chr10 | Open Sea    | 0.68603268  | 0.907867168 | 0.2218345 | 0.001451 |
| cg14119527 | chr10 | Open Sea    | 0.611728128 | 0.833556984 | 0.2218289 | 0.005431 |
| cg05256765 | chr10 | Open Sea    | 0.600378767 | 0.821738248 | 0.2213595 | 0.013947 |
| cg02764250 | chr10 | Open Sea    | 0.663458533 | 0.883968571 | 0.22051   | 0.000228 |
| cg12338657 | chr10 | Open Sea    | 0.522900052 | 0.743279605 | 0.2203796 | 0.000179 |
| cg16954727 | chr10 | Open Sea    | 0.658501192 | 0.87831496  | 0.2198138 | 0.012583 |
| cg25207366 | chr10 | Open Sea    | 0.630297411 | 0.849005562 | 0.2187082 | 0.014168 |
| cg26372765 | chr10 | North Shore | 0.716998175 | 0.935677877 | 0.2186797 | 0.000278 |
| cg14961117 | chr10 | Open Sea    | 0.654279914 | 0.872932296 | 0.2186524 | 0.035045 |
| cg19854704 | chr10 | South Shore | 0.654891053 | 0.873483927 | 0.2185929 | 0.004211 |
| cg18822598 | chr10 | Open Sea    | 0.574030785 | 0.790399638 | 0.2163689 | 0.007991 |
| cg16001913 | chr10 | Open Sea    | 0.642293217 | 0.858149484 | 0.2158563 | 0.008249 |
| cg24691332 | chr10 | Open Sea    | 0.615158355 | 0.830622549 | 0.2154642 | 0.030651 |
| cg09577691 | chr10 | Open Sea    | 0.663711378 | 0.878640427 | 0.214929  | 0.002832 |
| cg20715048 | chr10 | Open Sea    | 0.635814136 | 0.850587733 | 0.2147736 | 0.027221 |
| cg26725862 | chr10 | South Shore | 0.5571813   | 0.771273671 | 0.2140924 | 9.28E-05 |
| cg24798956 | chr10 | Open Sea    | 0.465061237 | 0.679104376 | 0.2140431 | 0.013522 |
| cg07372450 | chr10 | Open Sea    | 0.605847882 | 0.819373576 | 0.2135257 | 0.000461 |
| cg03253489 | chr10 | South Shelf | 0.469415714 | 0.682738891 | 0.2133232 | 1.15E-05 |
| cg26652266 | chr10 | Open Sea    | 0.597467317 | 0.809946162 | 0.2124788 | 0.001971 |
| cg20730333 | chr10 | Open Sea    | 0.562459972 | 0.774857049 | 0.2123971 | 0.011966 |
| cg20453042 | chr10 | Open Sea    | 0.675424121 | 0.887262516 | 0.2118384 | 0.00083  |
| cg09701700 | chr10 | South Shelf | 0.199408415 | 0.410969349 | 0.2115609 | 6.86E-07 |
| cg11065917 | chr10 | Open Sea    | 0.706432514 | 0.9178985   | 0.211466  | 7.12E-05 |
| cg24020806 | chr10 | North Shore | 0.68818975  | 0.899492051 | 0.2113023 | 0.001059 |
| cg08552446 | chr10 | Open Sea    | 0.689419418 | 0.900282703 | 0.2108633 | 4.22E-05 |
| cg19439651 | chr10 | Island      | 0.667518152 | 0.878341698 | 0.2108235 | 0.000573 |
| cg04276302 | chr10 | South Shelf | 0.522255006 | 0.733038075 | 0.2107831 | 0.023864 |
| cg15115960 | chr10 | Island      | 0.686304415 | 0.897052974 | 0.2107486 | 0.005503 |
| cg17849530 | chr10 | Open Sea    | 0.58630266  | 0.796864009 | 0.2105613 | 0.006875 |
| cg08781681 | chr10 | North Shelf | 0.673404098 | 0.883172757 | 0.2097687 | 0.007901 |
| cg25380207 | chr10 | Open Sea    | 0.681889658 | 0.891351436 | 0.2094618 | 0.000114 |
| cg17836236 | chr10 | Open Sea    | 0.719172201 | 0.928622558 | 0.2094504 | 0.000978 |
| cg25471987 | chr10 | Open Sea    | 0.692900029 | 0.901514082 | 0.2086141 | 0.000387 |
| cg19717640 | chr10 | Open Sea    | 0.498072812 | 0.706601148 | 0.2085283 | 0.000352 |
| cg13792641 | chr10 | Open Sea    | 0.553276992 | 0.761675    | 0.208398  | 0.004481 |
| cg15280358 | chr10 | Open Sea    | 0.537880563 | 0.746243211 | 0.2083626 | 0.027267 |
| cg14366292 | chr10 | Open Sea    | 0.669516249 | 0.877562223 | 0.208046  | 0.007362 |
| cg17179923 | chr10 | North Shore | 0.589506694 | 0.797392226 | 0.2078855 | 0.011084 |
| cg19760458 | chr10 | North Shore | 0.57060509  | 0.777712528 | 0.2071074 | 0.003489 |
| cg10542123 | chr10 | Open Sea    | 0.671946035 | 0.878956085 | 0.2070101 | 0.021268 |
| cg17266275 | chr10 | Open Sea    | 0.709478093 | 0.91634096  | 0.2068629 | 0.000364 |
| cg22601415 | chr10 | Open Sea    | 0.603482726 | 0.810302089 | 0.2068194 | 0.028888 |

|            |       |             |             |             |           |          |
|------------|-------|-------------|-------------|-------------|-----------|----------|
| cg26901096 | chr10 | Open Sea    | 0.668489905 | 0.875199366 | 0.2067095 | 0.000276 |
| cg03480068 | chr10 | Open Sea    | 0.6694067   | 0.87601382  | 0.2066071 | 0.001821 |
| cg27382910 | chr10 | Open Sea    | 0.36208972  | 0.568425151 | 0.2063354 | 0.021481 |
| cg17273837 | chr10 | Open Sea    | 0.635951121 | 0.842220775 | 0.2062697 | 0.00221  |
| cg09009466 | chr10 | Open Sea    | 0.514851268 | 0.721108211 | 0.2062569 | 0.000545 |
| cg26070333 | chr10 | Open Sea    | 0.627768925 | 0.83355898  | 0.2057901 | 0.004946 |
| cg00002449 | chr10 | South Shelf | 0.704904124 | 0.909900947 | 0.2049968 | 0.000332 |
| cg16652747 | chr10 | Open Sea    | 0.606590763 | 0.811405335 | 0.2048146 | 0.000367 |
| cg03273183 | chr10 | Open Sea    | 0.72800096  | 0.932753989 | 0.204753  | 0.000523 |
| cg08363001 | chr10 | Open Sea    | 0.685425339 | 0.890158266 | 0.2047329 | 0.000119 |
| cg13375636 | chr10 | Open Sea    | 0.596633939 | 0.801319591 | 0.2046857 | 0.000244 |
| cg11404502 | chr10 | Open Sea    | 0.607326883 | 0.811841996 | 0.2045151 | 1.41E-05 |
| cg15334916 | chr10 | South Shore | 0.681417271 | 0.885736204 | 0.2043189 | 0.03569  |
| cg04881751 | chr10 | South Shore | 0.695160756 | 0.898753639 | 0.2035929 | 0.030206 |
| cg05005367 | chr10 | South Shelf | 0.641120739 | 0.844660644 | 0.2035399 | 0.042701 |
| cg06834005 | chr10 | Open Sea    | 0.577290418 | 0.780646105 | 0.2033557 | 0.003018 |
| cg16885557 | chr10 | Open Sea    | 0.5576041   | 0.76012017  | 0.2025161 | 0.006237 |
| cg26345613 | chr10 | Open Sea    | 0.551574925 | 0.754003292 | 0.2024284 | 0.023633 |
| cg07206497 | chr10 | Open Sea    | 0.635254807 | 0.837543833 | 0.202289  | 0.000636 |
| cg26917256 | chr10 | Open Sea    | 0.62024489  | 0.821815847 | 0.201571  | 0.016082 |
| cg00075956 | chr10 | Open Sea    | 0.605524075 | 0.807013433 | 0.2014894 | 0.007377 |
| cg27617132 | chr10 | South Shelf | 0.748911353 | 0.950359081 | 0.2014477 | 0.00021  |
| cg18292394 | chr10 | Open Sea    | 0.41011064  | 0.61129532  | 0.2011847 | 0.011933 |
| cg22542222 | chr10 | Open Sea    | 0.58993533  | 0.791005579 | 0.2010702 | 0.00081  |
| cg03009785 | chr10 | Open Sea    | 0.601636827 | 0.802700475 | 0.2010636 | 0.024936 |
| cg02980650 | chr10 | North Shelf | 0.687780428 | 0.888704408 | 0.200924  | 2.46E-05 |
| cg22782105 | chr10 | Open Sea    | 0.650352316 | 0.851224431 | 0.2008721 | 0.002546 |
| cg20655761 | chr10 | Open Sea    | 0.486785193 | 0.687509504 | 0.2007243 | 5.97E-05 |
| cg20198183 | chr10 | Open Sea    | 0.643342994 | 0.843944234 | 0.2006012 | 0.000589 |
| cg23590472 | chr10 | North Shelf | 0.686905647 | 0.887185128 | 0.2002795 | 0.000968 |
| cg16829924 | chr11 | Open Sea    | 0.309548567 | 0.774606391 | 0.4650578 | 2.96E-05 |
| cg00554604 | chr11 | Island      | 0.46118     | 0.913168912 | 0.4519889 | 2.33E-07 |
| cg00243661 | chr11 | Open Sea    | 0.446778125 | 0.881028051 | 0.4342499 | 4.3E-10  |
| cg11272874 | chr11 | Open Sea    | 0.469206084 | 0.900037647 | 0.4308316 | 7.6E-09  |
| cg16197643 | chr11 | Island      | 0.34840722  | 0.772088157 | 0.4236809 | 0.02944  |
| cg16878549 | chr11 | Open Sea    | 0.420675381 | 0.82548282  | 0.4048074 | 0.035949 |
| cg23759189 | chr11 | Open Sea    | 0.447296723 | 0.846815673 | 0.3995189 | 1.29E-07 |
| cg09611599 | chr11 | North Shelf | 0.4818102   | 0.879487627 | 0.3976774 | 2.45E-05 |
| cg13844463 | chr11 | North Shelf | 0.198640373 | 0.596155557 | 0.3975152 | 0.002321 |
| cg18352935 | chr11 | Open Sea    | 0.392730395 | 0.786686968 | 0.3939566 | 9.91E-08 |
| cg02853387 | chr11 | Open Sea    | 0.359590768 | 0.751955147 | 0.3923644 | 0.045706 |
| cg10512089 | chr11 | Open Sea    | 0.373312213 | 0.760484393 | 0.3871722 | 0.00995  |
| cg21765235 | chr11 | Open Sea    | 0.407155941 | 0.791666606 | 0.3845107 | 0.00086  |
| cg02058483 | chr11 | South Shore | 0.510672028 | 0.893653906 | 0.3829819 | 2.92E-06 |
| cg26159860 | chr11 | Open Sea    | 0.443049657 | 0.825125161 | 0.3820755 | 0.008797 |
| cg22226680 | chr11 | Open Sea    | 0.446525439 | 0.827488042 | 0.3809626 | 1.42E-06 |
| cg07349899 | chr11 | Open Sea    | 0.494434422 | 0.872309275 | 0.3778749 | 0.006691 |
| cg11015348 | chr11 | Open Sea    | 0.406832257 | 0.783065481 | 0.3762332 | 0.025682 |
| cg11173246 | chr11 | North Shore | 0.431356588 | 0.804042396 | 0.3726858 | 0.000647 |
| cg01718479 | chr11 | Open Sea    | 0.322660899 | 0.694089037 | 0.3714281 | 0.04823  |



|            |       |             |             |             |           |          |
|------------|-------|-------------|-------------|-------------|-----------|----------|
| cg06993494 | chr11 | Open Sea    | 0.543388738 | 0.913497166 | 0.3701084 | 4.25E-06 |
| cg01966922 | chr11 | Open Sea    | 0.509643969 | 0.878273876 | 0.3686299 | 8.28E-07 |
| cg05343512 | chr11 | Open Sea    | 0.312684413 | 0.680751047 | 0.3680666 | 2.08E-07 |
| cg11828741 | chr11 | Open Sea    | 0.528013518 | 0.895089138 | 0.3670756 | 9.98E-07 |
| cg10378819 | chr11 | Open Sea    | 0.567945192 | 0.933422897 | 0.3654777 | 1.1E-06  |
| cg20910746 | chr11 | Open Sea    | 0.547343505 | 0.911253919 | 0.3639104 | 9.15E-08 |
| cg17120792 | chr11 | Open Sea    | 0.401674935 | 0.764988166 | 0.3633132 | 2.1E-07  |
| cg21578457 | chr11 | Open Sea    | 0.46855866  | 0.829922414 | 0.3613638 | 1.78E-07 |
| cg20181079 | chr11 | Open Sea    | 0.498198125 | 0.857281746 | 0.3590836 | 0.000182 |
| cg23694605 | chr11 | South Shelf | 0.466556712 | 0.825002978 | 0.3584463 | 0.049874 |
| cg21923959 | chr11 | Open Sea    | 0.441139648 | 0.796632318 | 0.3554927 | 0.043184 |
| cg05889171 | chr11 | South Shore | 0.406398331 | 0.761834359 | 0.355436  | 0.00021  |
| cg12365402 | chr11 | Open Sea    | 0.498918647 | 0.852862873 | 0.3539442 | 2.33E-07 |
| cg07237926 | chr11 | South Shore | 0.392277115 | 0.745346648 | 0.3530695 | 4.86E-07 |
| cg07782221 | chr11 | Open Sea    | 0.479019054 | 0.830181647 | 0.3511626 | 4.36E-09 |
| cg15672653 | chr11 | South Shelf | 0.290386757 | 0.641309585 | 0.3509228 | 0.001993 |
| cg01664929 | chr11 | Open Sea    | 0.531556248 | 0.882370166 | 0.3508139 | 2.67E-06 |
| cg05405389 | chr11 | Open Sea    | 0.410795698 | 0.760214443 | 0.3494187 | 0.001806 |
| cg01832325 | chr11 | Open Sea    | 0.421643251 | 0.768947709 | 0.3473045 | 0.001128 |
| cg05600421 | chr11 | Open Sea    | 0.436976879 | 0.781633025 | 0.3446561 | 5E-05    |
| cg02613300 | chr11 | Open Sea    | 0.45868957  | 0.803094201 | 0.3444046 | 0.049638 |
| cg23077606 | chr11 | Open Sea    | 0.467966278 | 0.811248555 | 0.3432823 | 8E-05    |
| cg02929780 | chr11 | Open Sea    | 0.4779994   | 0.820282343 | 0.3422829 | 4.85E-08 |
| cg26871279 | chr11 | South Shore | 0.510499732 | 0.851377662 | 0.3408779 | 9.29E-11 |
| cg02277453 | chr11 | Open Sea    | 0.428614061 | 0.768723905 | 0.3401098 | 1.54E-06 |
| cg20284999 | chr11 | Open Sea    | 0.519329928 | 0.859112679 | 0.3397828 | 9.26E-05 |
| cg18431486 | chr11 | Open Sea    | 0.585128299 | 0.924701473 | 0.3395732 | 3.7E-05  |
| cg04691233 | chr11 | Open Sea    | 0.533820472 | 0.870890265 | 0.3370698 | 0.000121 |
| cg23217386 | chr11 | Open Sea    | 0.544834284 | 0.88066895  | 0.3358347 | 1.24E-06 |
| cg10986946 | chr11 | Open Sea    | 0.385267778 | 0.720725938 | 0.3354582 | 9.61E-07 |
| cg05798059 | chr11 | Open Sea    | 0.499004422 | 0.83444796  | 0.3354435 | 0.009433 |
| cg26110281 | chr11 | Open Sea    | 0.520342917 | 0.855286927 | 0.334944  | 0.002732 |
| cg08470031 | chr11 | South Shore | 0.487132001 | 0.8220317   | 0.3348997 | 0.000268 |
| cg25877512 | chr11 | Open Sea    | 0.411261015 | 0.745717258 | 0.3344562 | 3.45E-07 |
| cg01605366 | chr11 | Open Sea    | 0.357488382 | 0.691690268 | 0.3342019 | 0.028416 |
| cg16739463 | chr11 | Open Sea    | 0.50453062  | 0.837632551 | 0.3331019 | 4.84E-05 |
| cg23741006 | chr11 | Open Sea    | 0.344671269 | 0.676995235 | 0.332324  | 0.008731 |
| cg02574022 | chr11 | Open Sea    | 0.465678625 | 0.796780301 | 0.3311017 | 6.33E-09 |
| cg16757456 | chr11 | Open Sea    | 0.407783811 | 0.738850914 | 0.3310671 | 8.41E-07 |
| cg00621646 | chr11 | Open Sea    | 0.45705195  | 0.787789492 | 0.3307375 | 0.000167 |
| cg12493906 | chr11 | Open Sea    | 0.553843498 | 0.883736857 | 0.3298934 | 5.1E-06  |
| cg11371231 | chr11 | Open Sea    | 0.491009974 | 0.820792919 | 0.3297829 | 0.04771  |
| cg03068446 | chr11 | Open Sea    | 0.556821712 | 0.885248471 | 0.3284268 | 0.000579 |
| cg18080819 | chr11 | North Shelf | 0.483027835 | 0.811271302 | 0.3282435 | 0.002    |
| cg23330212 | chr11 | Open Sea    | 0.456566727 | 0.783524066 | 0.3269573 | 1.34E-05 |
| cg19621338 | chr11 | Open Sea    | 0.575719356 | 0.902296338 | 0.326577  | 2.06E-06 |
| cg23828593 | chr11 | Open Sea    | 0.581152646 | 0.907617758 | 0.3264651 | 2.73E-06 |
| cg02150262 | chr11 | Open Sea    | 0.502679412 | 0.828787881 | 0.3261085 | 7.26E-06 |
| cg14569837 | chr11 | Open Sea    | 0.539402934 | 0.864722674 | 0.3253197 | 0.010624 |
| cg02118564 | chr11 | Open Sea    | 0.477824132 | 0.802362286 | 0.3245382 | 1.33E-06 |

|            |       |             |             |             |           |          |
|------------|-------|-------------|-------------|-------------|-----------|----------|
| cg00264754 | chr11 | Open Sea    | 0.555466523 | 0.87972812  | 0.3242616 | 2.41E-05 |
| cg18589858 | chr11 | Open Sea    | 0.555168897 | 0.879213846 | 0.3240449 | 0.014119 |
| cg04182215 | chr11 | North Shore | 0.592431388 | 0.913881084 | 0.3214497 | 1.44E-06 |
| cg16409259 | chr11 | South Shore | 0.600809311 | 0.922148227 | 0.3213389 | 2.79E-07 |
| cg05506209 | chr11 | Open Sea    | 0.573099632 | 0.892658186 | 0.3195586 | 1.46E-05 |
| cg17603909 | chr11 | Open Sea    | 0.495653729 | 0.814881127 | 0.3192274 | 0.000324 |
| cg05788927 | chr11 | Open Sea    | 0.464044072 | 0.78272244  | 0.3186784 | 0.000175 |
| cg26626251 | chr11 | North Shelf | 0.472444968 | 0.789800952 | 0.317356  | 0.045745 |
| cg16697433 | chr11 | Open Sea    | 0.559028542 | 0.876223837 | 0.3171953 | 0.031032 |
| cg01104306 | chr11 | Open Sea    | 0.405024534 | 0.72166554  | 0.316641  | 0.002282 |
| cg27135510 | chr11 | South Shore | 0.493862704 | 0.809854701 | 0.315992  | 0.005099 |
| cg01404122 | chr11 | Open Sea    | 0.541731471 | 0.857074912 | 0.3153434 | 0.016006 |
| cg01575601 | chr11 | Open Sea    | 0.513104397 | 0.828316452 | 0.3152121 | 0.000228 |
| cg13917863 | chr11 | Open Sea    | 0.578430314 | 0.892561663 | 0.3141313 | 7.74E-05 |
| cg00250805 | chr11 | South Shore | 0.583866561 | 0.897449781 | 0.3135832 | 0.002062 |
| cg11537479 | chr11 | Open Sea    | 0.561676687 | 0.875157439 | 0.3134808 | 0.017835 |
| cg25747935 | chr11 | Open Sea    | 0.426124113 | 0.737979726 | 0.3118556 | 0.008093 |
| cg02540833 | chr11 | North Shore | 0.551362286 | 0.863043857 | 0.3116816 | 1.22E-05 |
| cg12593634 | chr11 | Open Sea    | 0.426481645 | 0.737960819 | 0.3114792 | 7.17E-06 |
| cg01557260 | chr11 | North Shore | 0.610013513 | 0.920982409 | 0.3109689 | 8.03E-06 |
| cg07470968 | chr11 | Open Sea    | 0.543040332 | 0.853628776 | 0.3105884 | 2.99E-05 |
| cg11731238 | chr11 | Open Sea    | 0.61638509  | 0.926596622 | 0.3102115 | 2.16E-05 |
| cg27420123 | chr11 | Open Sea    | 0.438604582 | 0.748535878 | 0.3099313 | 0.017581 |
| cg21197233 | chr11 | North Shelf | 0.605594204 | 0.914638333 | 0.3090441 | 1.91E-05 |
| cg09667650 | chr11 | Open Sea    | 0.557848681 | 0.865552108 | 0.3077034 | 1.49E-05 |
| cg24652956 | chr11 | Open Sea    | 0.603772296 | 0.910498632 | 0.3067263 | 2.29E-05 |
| cg05922911 | chr11 | Open Sea    | 0.573821961 | 0.880196447 | 0.3063745 | 0.000296 |
| cg26226988 | chr11 | South Shore | 0.40690166  | 0.712714436 | 0.3058128 | 6.25E-08 |
| cg05327192 | chr11 | North Shelf | 0.567837199 | 0.873189063 | 0.3053519 | 0.008484 |
| cg10416861 | chr11 | Open Sea    | 0.518610508 | 0.822382331 | 0.3037718 | 0.036577 |
| cg17022830 | chr11 | Open Sea    | 0.547852357 | 0.851518738 | 0.3036664 | 0.023898 |
| cg03799230 | chr11 | Open Sea    | 0.533880857 | 0.836679517 | 0.3027987 | 5.89E-05 |
| cg24517989 | chr11 | Open Sea    | 0.50240717  | 0.804536791 | 0.3021296 | 0.014919 |
| cg10573143 | chr11 | Open Sea    | 0.54143742  | 0.842622391 | 0.301185  | 9.15E-05 |
| cg09905416 | chr11 | Open Sea    | 0.473763181 | 0.774685548 | 0.3009224 | 0.010054 |
| cg03316101 | chr11 | Open Sea    | 0.378486562 | 0.679351803 | 0.3008652 | 0.002607 |
| cg00385194 | chr11 | Open Sea    | 0.551120826 | 0.851566572 | 0.3004457 | 0.004459 |
| cg04756168 | chr11 | Open Sea    | 0.617728353 | 0.918117647 | 0.3003893 | 0.000123 |
| cg08426891 | chr11 | Open Sea    | 0.511484305 | 0.811838472 | 0.3003542 | 1.14E-05 |
| cg21758962 | chr11 | Open Sea    | 0.483360161 | 0.783267824 | 0.2999077 | 1.94E-05 |
| cg14269191 | chr11 | Open Sea    | 0.544350515 | 0.843918947 | 0.2995684 | 7.05E-05 |
| cg11983942 | chr11 | Open Sea    | 0.363581097 | 0.662720885 | 0.2991398 | 0.021317 |
| cg24360034 | chr11 | Open Sea    | 0.483655753 | 0.781845527 | 0.2981898 | 0.03269  |
| cg22794244 | chr11 | Open Sea    | 0.458904831 | 0.756667335 | 0.2977625 | 0.000233 |
| cg05941106 | chr11 | Open Sea    | 0.580420449 | 0.877281873 | 0.2968614 | 0.000309 |
| cg20176971 | chr11 | South Shelf | 0.477475874 | 0.774143777 | 0.2966679 | 0.002761 |
| cg08835992 | chr11 | Open Sea    | 0.515637968 | 0.811496833 | 0.2958589 | 0.000329 |
| cg24925945 | chr11 | Open Sea    | 0.605319738 | 0.900754374 | 0.2954346 | 0.000211 |
| cg08505647 | chr11 | Open Sea    | 0.450841028 | 0.746007667 | 0.2951666 | 0.000262 |
| cg05468843 | chr11 | South Shore | 0.187271322 | 0.481835862 | 0.2945645 | 2.8E-08  |

|            |       |             |             |             |           |          |
|------------|-------|-------------|-------------|-------------|-----------|----------|
| cg01882535 | chr11 | Open Sea    | 0.580962634 | 0.87275522  | 0.2917926 | 0.0004   |
| cg23194364 | chr11 | Open Sea    | 0.471458743 | 0.76254737  | 0.2910886 | 0.011497 |
| cg22719992 | chr11 | Open Sea    | 0.563374083 | 0.853679532 | 0.2903054 | 1.56E-05 |
| cg23652093 | chr11 | Open Sea    | 0.630859097 | 0.920245504 | 0.2893864 | 2.05E-05 |
| cg14801518 | chr11 | North Shore | 0.624570204 | 0.913865519 | 0.2892953 | 2.69E-06 |
| cg06847157 | chr11 | South Shore | 0.635293796 | 0.924513894 | 0.2892201 | 1.27E-05 |
| cg20288916 | chr11 | Open Sea    | 0.535666018 | 0.824588406 | 0.2889224 | 0.000321 |
| cg20338426 | chr11 | Open Sea    | 0.471053787 | 0.758553994 | 0.2875002 | 0.017297 |
| cg24964796 | chr11 | Open Sea    | 0.645988053 | 0.93281409  | 0.286826  | 4.23E-06 |
| cg04330874 | chr11 | Open Sea    | 0.544157414 | 0.830964952 | 0.2868075 | 0.021816 |
| cg10499172 | chr11 | North Shore | 0.406378059 | 0.693100639 | 0.2867226 | 0.001343 |
| cg19485748 | chr11 | Open Sea    | 0.304779681 | 0.590568346 | 0.2857887 | 0.000364 |
| cg15909725 | chr11 | Open Sea    | 0.616297688 | 0.901591925 | 0.2852942 | 1.29E-05 |
| cg12187358 | chr11 | Open Sea    | 0.555735472 | 0.840041154 | 0.2843057 | 7.04E-05 |
| cg11281320 | chr11 | Open Sea    | 0.554299776 | 0.838400566 | 0.2841008 | 0.000383 |
| cg25678587 | chr11 | Open Sea    | 0.446854041 | 0.730190704 | 0.2833367 | 0.018263 |
| cg18788940 | chr11 | North Shore | 0.394072962 | 0.677003819 | 0.2829309 | 0.023864 |
| cg04913291 | chr11 | Open Sea    | 0.472172386 | 0.754625393 | 0.282453  | 0.000231 |
| cg05340269 | chr11 | Open Sea    | 0.390753822 | 0.6716942   | 0.2809404 | 0.000775 |
| cg07101980 | chr11 | Open Sea    | 0.565984769 | 0.84600858  | 0.2800238 | 1.07E-07 |
| cg03825175 | chr11 | North Shore | 0.61528595  | 0.895006903 | 0.279721  | 4.25E-06 |
| cg23561531 | chr11 | Open Sea    | 0.387777365 | 0.667102492 | 0.2793251 | 6.42E-07 |
| cg08095183 | chr11 | Open Sea    | 0.628471805 | 0.907325894 | 0.2788541 | 0.000791 |
| cg10832281 | chr11 | Open Sea    | 0.44900291  | 0.726460679 | 0.2774578 | 0.013676 |
| cg09623623 | chr11 | Open Sea    | 0.582027951 | 0.859448078 | 0.2774201 | 0.000295 |
| cg01998856 | chr11 | Open Sea    | 0.337357429 | 0.614632499 | 0.2772751 | 0.006295 |
| cg21786381 | chr11 | North Shelf | 0.579536721 | 0.855593181 | 0.2760565 | 0.013599 |
| cg09923978 | chr11 | Open Sea    | 0.568264788 | 0.843783798 | 0.275519  | 0.002789 |
| cg24402151 | chr11 | Open Sea    | 0.575546097 | 0.850798202 | 0.2752521 | 0.028989 |
| cg21961694 | chr11 | Open Sea    | 0.475498208 | 0.750126749 | 0.2746285 | 0.013089 |
| cg26914334 | chr11 | Open Sea    | 0.521677823 | 0.794677213 | 0.2729994 | 0.005035 |
| cg20322837 | chr11 | Open Sea    | 0.533592849 | 0.805264487 | 0.2716716 | 0.00047  |
| cg25749341 | chr11 | Open Sea    | 0.619932039 | 0.890771298 | 0.2708393 | 0.00427  |
| cg20311730 | chr11 | Open Sea    | 0.593211565 | 0.863889318 | 0.2706778 | 0.00095  |
| cg03292992 | chr11 | South Shore | 0.335809752 | 0.605278565 | 0.2694688 | 0.033474 |
| cg20157095 | chr11 | Open Sea    | 0.556618381 | 0.825928025 | 0.2693096 | 0.016071 |
| cg26085520 | chr11 | Open Sea    | 0.575506346 | 0.844658588 | 0.2691522 | 0.001357 |
| cg05316601 | chr11 | Open Sea    | 0.62205288  | 0.890592056 | 0.2685392 | 1.09E-05 |
| cg10911054 | chr11 | Open Sea    | 0.460690559 | 0.729157305 | 0.2684667 | 0.004126 |
| cg19270623 | chr11 | North Shelf | 0.482196613 | 0.75061052  | 0.2684139 | 0.007621 |
| cg02635370 | chr11 | Open Sea    | 0.592034357 | 0.860215835 | 0.2681815 | 2.47E-05 |
| cg13869366 | chr11 | Open Sea    | 0.30076136  | 0.568920103 | 0.2681587 | 0.001159 |
| cg17001627 | chr11 | North Shore | 0.451311193 | 0.719426419 | 0.2681152 | 0.023142 |
| cg09419192 | chr11 | Open Sea    | 0.610289813 | 0.87792364  | 0.2676338 | 1.81E-05 |
| cg18205787 | chr11 | South Shelf | 0.421217221 | 0.688583423 | 0.2673662 | 0.014233 |
| cg05223210 | chr11 | Open Sea    | 0.404537766 | 0.671832475 | 0.2672947 | 0.007407 |
| cg17685019 | chr11 | Open Sea    | 0.3627622   | 0.629424501 | 0.2666623 | 0.001414 |
| cg06577521 | chr11 | South Shore | 0.595505047 | 0.861833048 | 0.266328  | 1.13E-05 |
| cg03236627 | chr11 | Open Sea    | 0.599835491 | 0.866088573 | 0.2662531 | 0.000447 |
| cg26966434 | chr11 | North Shelf | 0.631440729 | 0.897181709 | 0.265741  | 0.000196 |

|            |       |             |             |             |           |          |
|------------|-------|-------------|-------------|-------------|-----------|----------|
| cg19507805 | chr11 | Open Sea    | 0.632243418 | 0.897769916 | 0.2655265 | 5.57E-05 |
| cg10135474 | chr11 | Open Sea    | 0.454097296 | 0.719623075 | 0.2655258 | 0.001625 |
| cg26275110 | chr11 | North Shore | 0.486952881 | 0.752427998 | 0.2654751 | 0.035109 |
| cg24882525 | chr11 | South Shore | 0.642660412 | 0.908080832 | 0.2654204 | 0.002611 |
| cg05586607 | chr11 | North Shelf | 0.39953363  | 0.664349004 | 0.2648154 | 4.57E-05 |
| cg22812280 | chr11 | Open Sea    | 0.611064459 | 0.875190448 | 0.264126  | 0.000122 |
| cg27630678 | chr11 | South Shore | 0.683352075 | 0.947194623 | 0.2638425 | 5.23E-05 |
| cg01522592 | chr11 | North Shore | 0.468910475 | 0.732670711 | 0.2637602 | 0.04394  |
| cg12125173 | chr11 | Open Sea    | 0.36476243  | 0.628475123 | 0.2637127 | 0.002045 |
| cg03823352 | chr11 | Open Sea    | 0.511310845 | 0.774640188 | 0.2633293 | 0.002452 |
| cg06881914 | chr11 | Open Sea    | 0.43245809  | 0.695648458 | 0.2631904 | 0.001782 |
| cg23852348 | chr11 | North Shelf | 0.450505574 | 0.71357736  | 0.2630718 | 0.009969 |
| cg22712403 | chr11 | South Shore | 0.492863262 | 0.755693941 | 0.2628307 | 1.68E-05 |
| cg03348161 | chr11 | Open Sea    | 0.479965007 | 0.742551726 | 0.2625867 | 0.001233 |
| cg25346904 | chr11 | Open Sea    | 0.559820403 | 0.821680709 | 0.2618603 | 0.000134 |
| cg23206745 | chr11 | Open Sea    | 0.523408615 | 0.784257355 | 0.2608487 | 0.005257 |
| cg16244299 | chr11 | Open Sea    | 0.636928129 | 0.897738858 | 0.2608107 | 1.12E-05 |
| cg16446783 | chr11 | Open Sea    | 0.40936187  | 0.669753618 | 0.2603917 | 0.026191 |
| cg04926380 | chr11 | Open Sea    | 0.569912433 | 0.829443127 | 0.2595307 | 2.47E-05 |
| cg25800328 | chr11 | North Shore | 0.523897452 | 0.783118143 | 0.2592207 | 0.003922 |
| cg16626063 | chr11 | Open Sea    | 0.468931251 | 0.727734852 | 0.2588036 | 0.007804 |
| cg17667592 | chr11 | Open Sea    | 0.609182185 | 0.867911707 | 0.2587295 | 5.68E-05 |
| cg21736476 | chr11 | Open Sea    | 0.43391446  | 0.692457252 | 0.2585428 | 0.00028  |
| cg26698819 | chr11 | Open Sea    | 0.61645884  | 0.874793257 | 0.2583344 | 0.004289 |
| cg06483559 | chr11 | Open Sea    | 0.467458276 | 0.725773129 | 0.2583149 | 9.23E-07 |
| cg05032957 | chr11 | Open Sea    | 0.416658556 | 0.674376035 | 0.2577175 | 0.000111 |
| cg05055844 | chr11 | Open Sea    | 0.541175847 | 0.798766152 | 0.2575903 | 0.021947 |
| cg02536065 | chr11 | Open Sea    | 0.567163857 | 0.824536614 | 0.2573728 | 0.006932 |
| cg22358121 | chr11 | South Shore | 0.400121792 | 0.657082615 | 0.2569608 | 0.040397 |
| cg17164345 | chr11 | Open Sea    | 0.425319331 | 0.682074894 | 0.2567556 | 0.044804 |
| cg19940482 | chr11 | Open Sea    | 0.580245197 | 0.836633392 | 0.2563882 | 3.39E-06 |
| cg13844500 | chr11 | Open Sea    | 0.630296653 | 0.886639779 | 0.2563431 | 5.27E-05 |
| cg27303733 | chr11 | North Shore | 0.531535036 | 0.787519522 | 0.2559845 | 0.006225 |
| cg11807356 | chr11 | Open Sea    | 0.566659695 | 0.822534106 | 0.2558744 | 0.000139 |
| cg20480740 | chr11 | Open Sea    | 0.548694752 | 0.804263705 | 0.255569  | 0.000359 |
| cg22968167 | chr11 | Open Sea    | 0.63419095  | 0.888797779 | 0.2546068 | 6.17E-05 |
| cg16592378 | chr11 | Open Sea    | 0.510995162 | 0.765031246 | 0.2540361 | 0.032919 |
| cg11682774 | chr11 | Open Sea    | 0.652875293 | 0.906492031 | 0.2536167 | 8.9E-05  |
| cg01135800 | chr11 | Open Sea    | 0.4760632   | 0.729058844 | 0.2529956 | 0.000349 |
| cg11077392 | chr11 | Open Sea    | 0.328558701 | 0.581527366 | 0.2529687 | 0.000107 |
| cg04458776 | chr11 | Open Sea    | 0.480370467 | 0.7332169   | 0.2528464 | 0.012533 |
| cg20733250 | chr11 | Open Sea    | 0.614805916 | 0.867183333 | 0.2523774 | 0.006353 |
| cg27062927 | chr11 | Open Sea    | 0.668153075 | 0.920159431 | 0.2520064 | 0.000122 |
| cg08227141 | chr11 | Open Sea    | 0.49634891  | 0.74781016  | 0.2514613 | 0.000917 |
| cg13706611 | chr11 | Open Sea    | 0.557021781 | 0.808461117 | 0.2514393 | 1.55E-06 |
| cg23054121 | chr11 | South Shore | 0.59693828  | 0.84764876  | 0.2507105 | 0.017854 |
| cg19193135 | chr11 | Open Sea    | 0.601836512 | 0.851460055 | 0.2496235 | 3.1E-05  |
| cg04861489 | chr11 | Open Sea    | 0.636101143 | 0.885464488 | 0.2493633 | 3.33E-05 |
| cg02101485 | chr11 | Open Sea    | 0.637356487 | 0.886691225 | 0.2493347 | 3.71E-05 |
| cg23692386 | chr11 | Open Sea    | 0.649768359 | 0.89899855  | 0.2492302 | 8.35E-06 |

|            |       |             |             |             |           |          |
|------------|-------|-------------|-------------|-------------|-----------|----------|
| cg25937565 | chr11 | Open Sea    | 0.601416374 | 0.850341995 | 0.2489256 | 0.001441 |
| cg10972932 | chr11 | Open Sea    | 0.509116623 | 0.757939955 | 0.2488233 | 6.01E-05 |
| cg25967612 | chr11 | Open Sea    | 0.466516483 | 0.715321829 | 0.2488053 | 0.038981 |
| cg04063166 | chr11 | North Shelf | 0.212299552 | 0.461020159 | 0.2487206 | 0.000243 |
| cg11051429 | chr11 | Open Sea    | 0.634051137 | 0.882401776 | 0.2483506 | 0.000326 |
| cg20714968 | chr11 | South Shelf | 0.445318196 | 0.693475551 | 0.2481574 | 0.00035  |
| cg16698575 | chr11 | Open Sea    | 0.615792691 | 0.863893566 | 0.2481009 | 0.009098 |
| cg17426084 | chr11 | South Shore | 0.47797979  | 0.726027832 | 0.248048  | 0.000596 |
| cg04750099 | chr11 | Open Sea    | 0.526431348 | 0.774413751 | 0.2479824 | 2.07E-06 |
| cg05862393 | chr11 | Open Sea    | 0.576655372 | 0.82451787  | 0.2478625 | 0.00472  |
| cg10092198 | chr11 | Open Sea    | 0.399176353 | 0.646376001 | 0.2471996 | 0.000178 |
| cg08608126 | chr11 | Open Sea    | 0.596445567 | 0.842980582 | 0.246535  | 7.46E-05 |
| cg17559156 | chr11 | South Shelf | 0.683781423 | 0.930298645 | 0.2465172 | 2E-05    |
| cg23520574 | chr11 | Open Sea    | 0.606093811 | 0.852400924 | 0.2463071 | 0.0003   |
| cg06593118 | chr11 | Open Sea    | 0.65530232  | 0.90152791  | 0.2462256 | 0.000146 |
| cg21693437 | chr11 | South Shelf | 0.648996517 | 0.894685795 | 0.2456893 | 0.00122  |
| cg19814100 | chr11 | Open Sea    | 0.639584533 | 0.885050318 | 0.2454658 | 7.2E-06  |
| cg09074338 | chr11 | North Shelf | 0.493828901 | 0.739259878 | 0.245431  | 3.67E-05 |
| cg04339947 | chr11 | Open Sea    | 0.420949458 | 0.664733434 | 0.243784  | 0.009628 |
| cg22222663 | chr11 | Open Sea    | 0.474904497 | 0.71792999  | 0.2430255 | 0.008554 |
| cg14051368 | chr11 | North Shore | 0.27394378  | 0.51676037  | 0.2428166 | 2.06E-08 |
| cg13280803 | chr11 | Open Sea    | 0.389175283 | 0.631754667 | 0.2425794 | 0.00151  |
| cg09552510 | chr11 | Open Sea    | 0.441789612 | 0.684366013 | 0.2425764 | 0.02797  |
| cg18406570 | chr11 | Open Sea    | 0.586563876 | 0.829028176 | 0.2424643 | 0.00071  |
| cg24758816 | chr11 | North Shore | 0.596363048 | 0.838724236 | 0.2423612 | 0.019946 |
| cg23208430 | chr11 | Open Sea    | 0.329632333 | 0.571788953 | 0.2421566 | 0.030713 |
| cg12672540 | chr11 | South Shore | 0.564751502 | 0.806612664 | 0.2418612 | 0.000221 |
| cg06797734 | chr11 | Island      | 0.477473817 | 0.719092062 | 0.2416182 | 0.002086 |
| cg27533472 | chr11 | Open Sea    | 0.630510907 | 0.872027653 | 0.2415167 | 0.000315 |
| cg25327296 | chr11 | Open Sea    | 0.497928336 | 0.738792073 | 0.2408637 | 0.000744 |
| cg13313616 | chr11 | Open Sea    | 0.627719439 | 0.868358427 | 0.240639  | 0.001875 |
| cg08357627 | chr11 | North Shelf | 0.533272123 | 0.773748656 | 0.2404765 | 0.000183 |
| cg15159060 | chr11 | Open Sea    | 0.33200628  | 0.57242077  | 0.2404145 | 0.023439 |
| cg25022311 | chr11 | North Shelf | 0.587393715 | 0.82773261  | 0.2403389 | 0.004893 |
| cg06225242 | chr11 | Open Sea    | 0.674299828 | 0.914539845 | 0.24024   | 0.002238 |
| cg14660328 | chr11 | Open Sea    | 0.61186499  | 0.852057301 | 0.2401923 | 0.005382 |
| cg23851685 | chr11 | Open Sea    | 0.556970615 | 0.797101189 | 0.2401306 | 0.000563 |
| cg13427189 | chr11 | Open Sea    | 0.526271235 | 0.766370248 | 0.240099  | 2.99E-05 |
| cg02688359 | chr11 | Open Sea    | 0.600118454 | 0.840213995 | 0.2400955 | 0.038876 |
| cg22183731 | chr11 | South Shelf | 0.632308105 | 0.872073395 | 0.2397653 | 0.007735 |
| cg22622123 | chr11 | South Shore | 0.648395991 | 0.888131015 | 0.239735  | 0.00017  |
| cg25227672 | chr11 | Open Sea    | 0.457900691 | 0.697541867 | 0.2396412 | 0.001315 |
| cg01890712 | chr11 | Open Sea    | 0.638406385 | 0.877999946 | 0.2395936 | 0.022486 |
| cg22791045 | chr11 | Open Sea    | 0.61519871  | 0.854657564 | 0.2394589 | 0.00205  |
| cg16908944 | chr11 | Open Sea    | 0.667669321 | 0.906534629 | 0.2388653 | 2.76E-05 |
| cg09430223 | chr11 | Island      | 0.554284282 | 0.793118078 | 0.2388338 | 1.23E-07 |
| cg00446697 | chr11 | Open Sea    | 0.636516326 | 0.875228702 | 0.2387124 | 0.001336 |
| cg10704680 | chr11 | Open Sea    | 0.452943291 | 0.691611406 | 0.2386681 | 7.31E-05 |
| cg05233816 | chr11 | Open Sea    | 0.645860681 | 0.884445678 | 0.238585  | 0.000124 |
| cg17678645 | chr11 | South Shore | 0.472698855 | 0.71108143  | 0.2383826 | 2.6E-05  |

|            |       |             |             |             |           |          |
|------------|-------|-------------|-------------|-------------|-----------|----------|
| cg12750151 | chr11 | Open Sea    | 0.261587775 | 0.499892404 | 0.2383046 | 0.008361 |
| cg10361765 | chr11 | Open Sea    | 0.399856823 | 0.637566109 | 0.2377093 | 0.01572  |
| cg06582250 | chr11 | Open Sea    | 0.614257108 | 0.851317183 | 0.2370601 | 1.79E-05 |
| cg17578131 | chr11 | South Shelf | 0.37677884  | 0.613066594 | 0.2362878 | 0.009903 |
| cg16638248 | chr11 | Open Sea    | 0.393086714 | 0.629232554 | 0.2361458 | 0.000157 |
| cg10890346 | chr11 | Open Sea    | 0.410753575 | 0.645882994 | 0.2351294 | 3.3E-05  |
| cg14098737 | chr11 | Open Sea    | 0.674359021 | 0.909325896 | 0.2349669 | 0.000426 |
| cg08948964 | chr11 | Open Sea    | 0.633514871 | 0.86845473  | 0.2349399 | 0.001123 |
| cg05702234 | chr11 | Open Sea    | 0.635580923 | 0.870183314 | 0.2346024 | 0.000546 |
| cg02023548 | chr11 | Open Sea    | 0.502137806 | 0.736707976 | 0.2345702 | 0.00086  |
| cg20733108 | chr11 | Open Sea    | 0.604147832 | 0.838384774 | 0.2342369 | 0.000642 |
| cg18987103 | chr11 | South Shore | 0.526713638 | 0.760618618 | 0.233905  | 0.0275   |
| cg23132327 | chr11 | Open Sea    | 0.648074801 | 0.881908254 | 0.2338335 | 9.17E-05 |
| cg09807524 | chr11 | South Shelf | 0.646821118 | 0.880375433 | 0.2335543 | 0.021456 |
| cg07616094 | chr11 | Open Sea    | 0.611706875 | 0.84524506  | 0.2335382 | 0.001733 |
| cg05658811 | chr11 | Open Sea    | 0.408145867 | 0.641295361 | 0.2331495 | 0.016398 |
| cg21719418 | chr11 | Open Sea    | 0.631273313 | 0.864160476 | 0.2328872 | 4.91E-05 |
| cg03587117 | chr11 | Open Sea    | 0.576026682 | 0.807696739 | 0.2316701 | 0.008022 |
| cg23832825 | chr11 | Open Sea    | 0.704528746 | 0.936195345 | 0.2316666 | 0.000709 |
| cg01297180 | chr11 | North Shore | 0.45366596  | 0.68513608  | 0.2314701 | 0.013252 |
| cg06457534 | chr11 | Open Sea    | 0.668373257 | 0.89929124  | 0.230918  | 0.000503 |
| cg06174078 | chr11 | Open Sea    | 0.625745642 | 0.855135228 | 0.2293896 | 0.004046 |
| cg26429499 | chr11 | Island      | 0.393050453 | 0.622421848 | 0.2293714 | 0.000415 |
| cg15542639 | chr11 | Open Sea    | 0.676361117 | 0.905692049 | 0.2293309 | 1.59E-05 |
| cg03566682 | chr11 | Open Sea    | 0.673468504 | 0.902627841 | 0.2291593 | 0.00417  |
| cg27214378 | chr11 | Open Sea    | 0.608153635 | 0.837286395 | 0.2291328 | 0.000642 |
| cg25092764 | chr11 | Open Sea    | 0.677959465 | 0.906596481 | 0.228637  | 0.000525 |
| cg16608656 | chr11 | North Shore | 0.306105044 | 0.534726098 | 0.2286211 | 0.006894 |
| cg08331163 | chr11 | Open Sea    | 0.55511373  | 0.783413572 | 0.2282998 | 0.000162 |
| cg14023329 | chr11 | Open Sea    | 0.553591709 | 0.781562432 | 0.2279707 | 0.000472 |
| cg16589461 | chr11 | South Shore | 0.643525554 | 0.871339942 | 0.2278144 | 0.006843 |
| cg02037905 | chr11 | Open Sea    | 0.615115486 | 0.842614872 | 0.2274994 | 0.013363 |
| cg06698926 | chr11 | Open Sea    | 0.437469831 | 0.664606416 | 0.2271366 | 3.81E-06 |
| cg03861143 | chr11 | Open Sea    | 0.62184284  | 0.848970102 | 0.2271273 | 8.97E-05 |
| cg08772028 | chr11 | Open Sea    | 0.39163245  | 0.618532867 | 0.2269004 | 0.029404 |
| cg06466839 | chr11 | Open Sea    | 0.430865507 | 0.65756358  | 0.2266981 | 0.001841 |
| cg12819873 | chr11 | Open Sea    | 0.644965666 | 0.871144656 | 0.226179  | 6.9E-05  |
| cg06118609 | chr11 | Open Sea    | 0.574863161 | 0.800823878 | 0.2259607 | 0.00272  |
| cg23756005 | chr11 | Open Sea    | 0.610227074 | 0.836182967 | 0.2259559 | 0.016976 |
| cg22802812 | chr11 | Open Sea    | 0.691349312 | 0.91725149  | 0.2259022 | 1.16E-05 |
| cg17033359 | chr11 | Open Sea    | 0.380965272 | 0.606670568 | 0.2257053 | 2.93E-05 |
| cg26328687 | chr11 | Open Sea    | 0.199764295 | 0.425418312 | 0.225654  | 0.001163 |
| cg05280255 | chr11 | North Shelf | 0.700804069 | 0.926289278 | 0.2254852 | 0.000268 |
| cg08344485 | chr11 | Open Sea    | 0.650119473 | 0.875535245 | 0.2254158 | 0.006715 |
| cg02200642 | chr11 | Open Sea    | 0.624626977 | 0.849789846 | 0.2251629 | 0.004857 |
| cg24258347 | chr11 | North Shore | 0.639203742 | 0.86387582  | 0.2246721 | 0.002196 |
| cg04230073 | chr11 | North Shore | 0.552616114 | 0.777168928 | 0.2245528 | 1.15E-05 |
| cg02697979 | chr11 | Open Sea    | 0.448107948 | 0.672637619 | 0.2245297 | 0.004689 |
| cg09913813 | chr11 | Open Sea    | 0.410645175 | 0.634997175 | 0.224352  | 2.4E-06  |
| cg25481454 | chr11 | Open Sea    | 0.601430756 | 0.825710715 | 0.22428   | 0.00242  |

|            |       |             |             |             |           |          |
|------------|-------|-------------|-------------|-------------|-----------|----------|
| cg07170641 | chr11 | Open Sea    | 0.610305052 | 0.834155596 | 0.2238505 | 0.00047  |
| cg10027639 | chr11 | Open Sea    | 0.450592915 | 0.67430914  | 0.2237162 | 0.015513 |
| cg06268956 | chr11 | South Shore | 0.533668486 | 0.757299828 | 0.2236313 | 0.003232 |
| cg03402922 | chr11 | Open Sea    | 0.622001501 | 0.845428966 | 0.2234275 | 1.39E-06 |
| cg27629782 | chr11 | Open Sea    | 0.641393036 | 0.864612926 | 0.2232199 | 0.00744  |
| cg06417518 | chr11 | North Shelf | 0.697911691 | 0.920530146 | 0.2226185 | 0.000669 |
| cg05820396 | chr11 | Open Sea    | 0.489981419 | 0.712504123 | 0.2225227 | 0.031998 |
| cg05709458 | chr11 | North Shelf | 0.635779796 | 0.858043596 | 0.2222638 | 0.004667 |
| cg24258886 | chr11 | South Shelf | 0.693537831 | 0.915799235 | 0.2222614 | 6.38E-05 |
| cg24921031 | chr11 | Open Sea    | 0.572438683 | 0.794664187 | 0.2222255 | 0.000724 |
| cg11189022 | chr11 | Open Sea    | 0.652271641 | 0.874131581 | 0.2218599 | 0.000956 |
| cg04511463 | chr11 | Open Sea    | 0.705378408 | 0.927212037 | 0.2218336 | 0.000109 |
| cg06869755 | chr11 | North Shore | 0.586592242 | 0.808133526 | 0.2215413 | 0.000253 |
| cg00562107 | chr11 | Open Sea    | 0.598962165 | 0.820071815 | 0.2211096 | 0.0221   |
| cg13071185 | chr11 | South Shore | 0.495032299 | 0.715894673 | 0.2208624 | 9.02E-06 |
| cg05921138 | chr11 | Open Sea    | 0.67932628  | 0.900177624 | 0.2208513 | 0.004637 |
| cg25754143 | chr11 | South Shelf | 0.497136765 | 0.717859859 | 0.2207231 | 0.002529 |
| cg15102387 | chr11 | Open Sea    | 0.495839469 | 0.716430483 | 0.220591  | 0.001195 |
| cg19828846 | chr11 | Open Sea    | 0.464301645 | 0.684848307 | 0.2205467 | 0.042546 |
| cg20178075 | chr11 | Open Sea    | 0.595259149 | 0.815563262 | 0.2203041 | 0.004782 |
| cg03209130 | chr11 | Open Sea    | 0.65974421  | 0.879546474 | 0.2198023 | 0.000413 |
| cg06842181 | chr11 | Open Sea    | 0.452256318 | 0.671997459 | 0.2197411 | 0.00671  |
| cg23810463 | chr11 | Open Sea    | 0.544762234 | 0.764433276 | 0.219671  | 0.014903 |
| cg15500466 | chr11 | South Shelf | 0.66236294  | 0.881901399 | 0.2195385 | 0.028362 |
| cg02873384 | chr11 | Open Sea    | 0.393936249 | 0.613362094 | 0.2194258 | 1E-06    |
| cg14813258 | chr11 | Open Sea    | 0.677303282 | 0.896359318 | 0.219056  | 0.000245 |
| cg07453773 | chr11 | Open Sea    | 0.662405624 | 0.881411628 | 0.219006  | 3.06E-05 |
| cg25262147 | chr11 | Open Sea    | 0.585730308 | 0.804539107 | 0.2188088 | 0.002334 |
| cg24360747 | chr11 | North Shelf | 0.618234704 | 0.836860221 | 0.2186255 | 0.005057 |
| cg08919594 | chr11 | Open Sea    | 0.647166495 | 0.865308292 | 0.2181418 | 0.001173 |
| cg06834698 | chr11 | Open Sea    | 0.623812952 | 0.841758966 | 0.217946  | 0.001685 |
| cg14926715 | chr11 | Open Sea    | 0.63485123  | 0.852509642 | 0.2176584 | 0.002955 |
| cg23894980 | chr11 | Open Sea    | 0.646982595 | 0.864596766 | 0.2176142 | 0.011359 |
| cg15343224 | chr11 | Open Sea    | 0.472047403 | 0.689200236 | 0.2171528 | 0.000154 |
| cg20871721 | chr11 | Open Sea    | 0.644133289 | 0.861178979 | 0.2170457 | 0.036598 |
| cg05275576 | chr11 | Open Sea    | 0.661856333 | 0.878822832 | 0.2169665 | 2.05E-05 |
| cg01612449 | chr11 | North Shore | 0.487935746 | 0.704788617 | 0.2168529 | 4.03E-05 |
| cg10914667 | chr11 | Open Sea    | 0.626041721 | 0.842843376 | 0.2168017 | 0.029036 |
| cg21767798 | chr11 | Open Sea    | 0.665210604 | 0.881500799 | 0.2162902 | 0.026295 |
| cg12733154 | chr11 | Open Sea    | 0.673430959 | 0.889644464 | 0.2162135 | 0.001727 |
| cg08400935 | chr11 | Open Sea    | 0.599191111 | 0.815374981 | 0.2161839 | 0.039232 |
| cg25469406 | chr11 | Open Sea    | 0.635645833 | 0.85171283  | 0.216067  | 0.024434 |
| cg21071075 | chr11 | Open Sea    | 0.542712268 | 0.7587116   | 0.2159993 | 0.013652 |
| cg07524505 | chr11 | Open Sea    | 0.694288108 | 0.910236407 | 0.2159483 | 0.002378 |
| cg19821098 | chr11 | Island      | 0.673183552 | 0.887388517 | 0.214205  | 0.000728 |
| cg13724238 | chr11 | South Shore | 0.655672117 | 0.869769072 | 0.214097  | 0.009096 |
| cg04726985 | chr11 | Open Sea    | 0.669750093 | 0.883377393 | 0.2136273 | 0.000377 |
| cg08001668 | chr11 | Open Sea    | 0.52732065  | 0.74057472  | 0.2132541 | 0.011753 |
| cg15896978 | chr11 | South Shelf | 0.594013572 | 0.807049837 | 0.2130363 | 0.01388  |
| cg26378984 | chr11 | South Shelf | 0.647906328 | 0.86082107  | 0.2129147 | 0.000318 |

|            |       |             |             |             |           |          |
|------------|-------|-------------|-------------|-------------|-----------|----------|
| cg07804888 | chr11 | Open Sea    | 0.593591284 | 0.806170186 | 0.2125789 | 0.000406 |
| cg24750539 | chr11 | Open Sea    | 0.320828578 | 0.533389001 | 0.2125604 | 0.036833 |
| cg05429698 | chr11 | Open Sea    | 0.662359387 | 0.874869728 | 0.2125103 | 0.000178 |
| cg07026904 | chr11 | South Shore | 0.475417825 | 0.687666451 | 0.2122486 | 0.023438 |
| cg19138905 | chr11 | Open Sea    | 0.713717777 | 0.925958609 | 0.2122408 | 0.000345 |
| cg18841668 | chr11 | Open Sea    | 0.663370377 | 0.875595456 | 0.2122251 | 0.000875 |
| cg08747970 | chr11 | Island      | 0.712368466 | 0.924107588 | 0.2117391 | 0.000397 |
| cg01171670 | chr11 | Open Sea    | 0.5931588   | 0.804618856 | 0.2114601 | 0.020536 |
| cg26922007 | chr11 | Open Sea    | 0.691138606 | 0.902113207 | 0.2109746 | 0.003704 |
| cg12686407 | chr11 | South Shore | 0.690158432 | 0.901000416 | 0.210842  | 0.005676 |
| cg19614312 | chr11 | Open Sea    | 0.689621178 | 0.900387942 | 0.2107668 | 0.001209 |
| cg10159728 | chr11 | South Shore | 0.489567799 | 0.700168473 | 0.2106007 | 0.043447 |
| cg25106172 | chr11 | South Shelf | 0.703385434 | 0.913849138 | 0.2104637 | 6.59E-06 |
| cg08357230 | chr11 | North Shore | 0.611398192 | 0.821689617 | 0.2102914 | 0.029275 |
| cg25504884 | chr11 | Open Sea    | 0.607491446 | 0.817767536 | 0.2102761 | 0.003546 |
| cg06950730 | chr11 | Open Sea    | 0.570391832 | 0.780558965 | 0.2101671 | 0.001321 |
| cg07618110 | chr11 | Open Sea    | 0.616014934 | 0.826060444 | 0.2100455 | 0.004022 |
| cg02313836 | chr11 | South Shelf | 0.695898792 | 0.905716188 | 0.2098174 | 0.000379 |
| cg19047670 | chr11 | South Shore | 0.664868665 | 0.87452721  | 0.2096585 | 0.003025 |
| cg04717045 | chr11 | North Shore | 0.669335577 | 0.878982707 | 0.2096471 | 0.030453 |
| cg05093315 | chr11 | South Shore | 0.381873614 | 0.591406097 | 0.2095325 | 0.018738 |
| cg01562537 | chr11 | Open Sea    | 0.598338981 | 0.807756745 | 0.2094178 | 0.004261 |
| cg22946774 | chr11 | Open Sea    | 0.560076374 | 0.769222336 | 0.209146  | 0.029983 |
| cg02321903 | chr11 | North Shelf | 0.677974313 | 0.886990256 | 0.2090159 | 1.58E-05 |
| cg01047778 | chr11 | Open Sea    | 0.72798621  | 0.936540363 | 0.2085542 | 0.004961 |
| cg02992224 | chr11 | Island      | 0.667338655 | 0.875573426 | 0.2082348 | 0.043728 |
| cg15722533 | chr11 | Open Sea    | 0.640754736 | 0.84864681  | 0.2078921 | 0.000179 |
| cg07344468 | chr11 | Open Sea    | 0.388875256 | 0.596722713 | 0.2078475 | 0.034627 |
| cg23995769 | chr11 | Open Sea    | 0.647794049 | 0.855253665 | 0.2074596 | 0.001511 |
| cg22806934 | chr11 | Open Sea    | 0.644272936 | 0.851418445 | 0.2071455 | 0.013198 |
| cg01796225 | chr11 | North Shore | 0.584284553 | 0.791268756 | 0.2069842 | 0.010775 |
| cg10819467 | chr11 | South Shore | 0.68580861  | 0.89249633  | 0.2066877 | 5.35E-05 |
| cg13988440 | chr11 | Open Sea    | 0.691202346 | 0.8976735   | 0.2064712 | 0.000357 |
| cg04212127 | chr11 | Open Sea    | 0.468096024 | 0.674558268 | 0.2064622 | 0.047872 |
| cg21092388 | chr11 | Open Sea    | 0.668161089 | 0.874488183 | 0.2063271 | 7.06E-05 |
| cg02568531 | chr11 | South Shore | 0.394901105 | 0.601164474 | 0.2062634 | 6.22E-05 |
| cg11108702 | chr11 | North Shore | 0.684509918 | 0.890348217 | 0.2058383 | 0.000166 |
| cg12128119 | chr11 | South Shore | 0.682690316 | 0.88847172  | 0.2057814 | 0.0025   |
| cg23713772 | chr11 | Open Sea    | 0.557465952 | 0.763242701 | 0.2057767 | 0.000242 |
| cg16309319 | chr11 | Open Sea    | 0.678703029 | 0.884322399 | 0.2056194 | 0.00239  |
| cg04163147 | chr11 | Open Sea    | 0.70286356  | 0.908381858 | 0.2055183 | 0.002279 |
| cg23843407 | chr11 | Open Sea    | 0.652138225 | 0.857609697 | 0.2054715 | 0.000313 |
| cg04987335 | chr11 | Open Sea    | 0.538161013 | 0.743607728 | 0.2054467 | 0.004906 |
| cg03771580 | chr11 | Open Sea    | 0.556757729 | 0.762121883 | 0.2053642 | 0.000119 |
| cg01003390 | chr11 | Open Sea    | 0.554218425 | 0.759544966 | 0.2053265 | 0.000117 |
| cg11921952 | chr11 | North Shore | 0.692604083 | 0.89710535  | 0.2045013 | 2.55E-05 |
| cg12985204 | chr11 | Island      | 0.534433616 | 0.73877209  | 0.2043385 | 0.04341  |
| cg22330021 | chr11 | North Shelf | 0.490436556 | 0.694077989 | 0.2036414 | 0.000196 |
| cg22656940 | chr11 | Open Sea    | 0.576807739 | 0.78042025  | 0.2036125 | 0.005242 |
| cg27509693 | chr11 | Island      | 0.706527119 | 0.910045115 | 0.203518  | 0.001035 |



|            |       |             |             |             |           |          |
|------------|-------|-------------|-------------|-------------|-----------|----------|
| cg10694914 | chr11 | Open Sea    | 0.696880392 | 0.90026661  | 0.2033862 | 0.002291 |
| cg02130149 | chr11 | Open Sea    | 0.6107041   | 0.813944995 | 0.2032409 | 0.037058 |
| cg02311801 | chr11 | North Shelf | 0.618872454 | 0.821838863 | 0.2029664 | 0.003127 |
| cg06246444 | chr11 | Open Sea    | 0.719017207 | 0.921957769 | 0.2029406 | 0.000541 |
| cg01917716 | chr11 | Open Sea    | 0.448741018 | 0.651661363 | 0.2029203 | 0.000255 |
| cg14745748 | chr11 | Open Sea    | 0.702337224 | 0.905244068 | 0.2029068 | 0.000181 |
| cg07236001 | chr11 | Open Sea    | 0.533723118 | 0.736381697 | 0.2026586 | 0.001121 |
| cg15172739 | chr11 | North Shelf | 0.496299755 | 0.698877205 | 0.2025774 | 0.001072 |
| cg12723492 | chr11 | Open Sea    | 0.51111136  | 0.713367322 | 0.2022537 | 0.014493 |
| cg18438823 | chr11 | Open Sea    | 0.629621782 | 0.831464875 | 0.2018431 | 0.001184 |
| cg25505880 | chr11 | South Shore | 0.43673918  | 0.638498573 | 0.2017594 | 0.027429 |
| cg26103805 | chr11 | Open Sea    | 0.60977703  | 0.810985933 | 0.2012089 | 3.31E-05 |
| cg14057456 | chr11 | South Shore | 0.552535852 | 0.753535134 | 0.2009993 | 0.014433 |
| cg23632744 | chr11 | Open Sea    | 0.736562246 | 0.937280955 | 0.2007187 | 0.000992 |
| cg02294791 | chr11 | Open Sea    | 0.566630779 | 0.767145479 | 0.2005147 | 0.002106 |
| cg02719956 | chr11 | South Shore | 0.697539088 | 0.897779988 | 0.2002409 | 0.000319 |
| cg16638793 | chr11 | Open Sea    | 0.642809614 | 0.843037647 | 0.200228  | 0.009097 |
| cg03158561 | chr11 | South Shore | 0.330361961 | 0.530465711 | 0.2001037 | 0.036824 |
| cg19241619 | chr11 | Open Sea    | 0.528175374 | 0.728271957 | 0.2000966 | 0.019017 |
| cg07139165 | chr11 | North Shelf | 0.727265579 | 0.927353254 | 0.2000877 | 0.000701 |
| cg10320783 | chr11 | Open Sea    | 0.708878491 | 0.908929376 | 0.2000509 | 0.002768 |
| cg07116732 | chr12 | North Shore | 0.272566123 | 0.757921263 | 0.4853551 | 0.04085  |
| cg19310515 | chr12 | Open Sea    | 0.368750145 | 0.837486118 | 0.468736  | 1.65E-06 |
| cg12051956 | chr12 | North Shelf | 0.341168264 | 0.805516971 | 0.4643487 | 1.41E-05 |
| cg01099855 | chr12 | Open Sea    | 0.430301556 | 0.882751198 | 0.4524496 | 1.6E-09  |
| cg15985905 | chr12 | Open Sea    | 0.34156645  | 0.792885556 | 0.4513191 | 0.015038 |
| cg02826233 | chr12 | North Shore | 0.384293563 | 0.833110373 | 0.4488168 | 1.11E-05 |
| cg07269374 | chr12 | Open Sea    | 0.457853326 | 0.90333854  | 0.4454852 | 6.57E-09 |
| cg15001406 | chr12 | Open Sea    | 0.251750718 | 0.695024424 | 0.4432737 | 0.000375 |
| cg03035704 | chr12 | South Shore | 0.465638774 | 0.896642953 | 0.4310042 | 0.000164 |
| cg13802583 | chr12 | Open Sea    | 0.375866019 | 0.804081099 | 0.4282151 | 0.007471 |
| cg07911905 | chr12 | Open Sea    | 0.512528689 | 0.9357417   | 0.423213  | 5.06E-08 |
| cg02854396 | chr12 | Open Sea    | 0.357085978 | 0.779339341 | 0.4222534 | 0.015051 |
| cg23320693 | chr12 | Open Sea    | 0.452870256 | 0.873148205 | 0.4202779 | 2.76E-08 |
| cg15104815 | chr12 | North Shelf | 0.454124724 | 0.874042347 | 0.4199176 | 5.01E-05 |
| cg13205848 | chr12 | Open Sea    | 0.327884791 | 0.746973981 | 0.4190892 | 0.016194 |
| cg17967602 | chr12 | Open Sea    | 0.419667394 | 0.837526653 | 0.4178593 | 3.82E-07 |
| cg24097814 | chr12 | Open Sea    | 0.502551469 | 0.918972532 | 0.4164211 | 9.05E-10 |
| cg15026456 | chr12 | Open Sea    | 0.474888681 | 0.888196184 | 0.4133075 | 5.86E-07 |
| cg20210051 | chr12 | Open Sea    | 0.30530889  | 0.716905137 | 0.4115962 | 1.9E-08  |
| cg23058246 | chr12 | Open Sea    | 0.481402192 | 0.892496723 | 0.4110945 | 3.95E-09 |
| cg08261450 | chr12 | North Shelf | 0.192026715 | 0.601232192 | 0.4092055 | 0.005869 |
| cg07703756 | chr12 | Open Sea    | 0.37888526  | 0.785000254 | 0.406115  | 2.23E-11 |
| cg03327443 | chr12 | South Shelf | 0.414248332 | 0.812500704 | 0.3982524 | 0.001126 |
| cg01781119 | chr12 | Open Sea    | 0.472576417 | 0.867784481 | 0.3952081 | 1.9E-06  |
| cg17781464 | chr12 | Open Sea    | 0.429866378 | 0.823840498 | 0.3939741 | 0.001027 |
| cg05409945 | chr12 | Open Sea    | 0.457692533 | 0.84903883  | 0.3913463 | 1.85E-08 |
| cg19653282 | chr12 | Open Sea    | 0.434224944 | 0.824531216 | 0.3903063 | 0.001449 |
| cg12545986 | chr12 | Open Sea    | 0.32755455  | 0.712692539 | 0.385138  | 1.49E-06 |
| cg26066361 | chr12 | Open Sea    | 0.422328811 | 0.806659335 | 0.3843305 | 2.58E-07 |

|            |       |             |             |             |           |          |
|------------|-------|-------------|-------------|-------------|-----------|----------|
| cg08094614 | chr12 | Open Sea    | 0.534016005 | 0.912483348 | 0.3784673 | 3.21E-05 |
| cg12795893 | chr12 | North Shore | 0.253142749 | 0.6313203   | 0.3781776 | 4.78E-08 |
| cg00608661 | chr12 | Open Sea    | 0.485059121 | 0.860898192 | 0.3758391 | 0.005087 |
| cg20569804 | chr12 | Open Sea    | 0.413657145 | 0.789343189 | 0.375686  | 0.00086  |
| cg04626868 | chr12 | Open Sea    | 0.535058362 | 0.910180356 | 0.375122  | 1.83E-05 |
| cg26796443 | chr12 | Open Sea    | 0.441574103 | 0.816519177 | 0.3749451 | 2.16E-08 |
| cg01230386 | chr12 | Open Sea    | 0.501285776 | 0.872911387 | 0.3716256 | 8.65E-08 |
| cg24703336 | chr12 | Open Sea    | 0.392663184 | 0.763823305 | 0.3711601 | 0.000386 |
| cg27005906 | chr12 | Open Sea    | 0.460433261 | 0.830910977 | 0.3704777 | 0.001457 |
| cg25563625 | chr12 | Open Sea    | 0.531260492 | 0.898871287 | 0.3676108 | 1.09E-05 |
| cg05400252 | chr12 | Open Sea    | 0.498051487 | 0.864185109 | 0.3661336 | 2.31E-07 |
| cg16204225 | chr12 | Open Sea    | 0.572797653 | 0.938335716 | 0.3655381 | 2.22E-07 |
| cg01940139 | chr12 | Open Sea    | 0.49657031  | 0.858729187 | 0.3621589 | 3.81E-08 |
| cg09828575 | chr12 | Island      | 0.408633334 | 0.769637393 | 0.3610041 | 1.78E-06 |
| cg24622007 | chr12 | North Shore | 0.484948003 | 0.845322638 | 0.3603746 | 0.0297   |
| cg19475020 | chr12 | Open Sea    | 0.446614748 | 0.805840616 | 0.3592259 | 5.48E-08 |
| cg14873958 | chr12 | Open Sea    | 0.279742874 | 0.636694034 | 0.3569512 | 0.004496 |
| cg22800453 | chr12 | Open Sea    | 0.513642322 | 0.870575306 | 0.356933  | 5.34E-08 |
| cg07854132 | chr12 | Open Sea    | 0.453579155 | 0.809851069 | 0.3562719 | 0.039583 |
| cg22245858 | chr12 | Open Sea    | 0.522703167 | 0.872675064 | 0.3499719 | 1.37E-05 |
| cg01835489 | chr12 | South Shore | 0.556422802 | 0.906079369 | 0.3496566 | 3.4E-07  |
| cg19179869 | chr12 | Open Sea    | 0.550832334 | 0.89832694  | 0.3474946 | 0.000236 |
| cg14399475 | chr12 | Open Sea    | 0.532792076 | 0.877993111 | 0.345201  | 9.11E-07 |
| cg10923855 | chr12 | Island      | 0.528061337 | 0.872996619 | 0.3449353 | 1.4E-07  |
| cg26945941 | chr12 | North Shelf | 0.501008769 | 0.844745168 | 0.3437364 | 2.1E-07  |
| cg02485729 | chr12 | Open Sea    | 0.477726596 | 0.820596992 | 0.3428704 | 8.77E-06 |
| cg27205798 | chr12 | Open Sea    | 0.575944376 | 0.918667679 | 0.3427233 | 2.1E-07  |
| cg23256150 | chr12 | Open Sea    | 0.47072019  | 0.813076878 | 0.3423567 | 0.005169 |
| cg23373401 | chr12 | South Shore | 0.309234406 | 0.648959762 | 0.3397254 | 0.014505 |
| cg12690978 | chr12 | Open Sea    | 0.534420909 | 0.873994568 | 0.3395737 | 6.54E-06 |
| cg25497938 | chr12 | Open Sea    | 0.582439665 | 0.91758391  | 0.3351442 | 5.9E-08  |
| cg24007169 | chr12 | South Shelf | 0.483677969 | 0.81663106  | 0.3329531 | 0.005275 |
| cg17878273 | chr12 | North Shelf | 0.531157939 | 0.86410155  | 0.3329436 | 9.05E-06 |
| cg24112692 | chr12 | Open Sea    | 0.544040669 | 0.874474    | 0.3304333 | 7.66E-07 |
| cg21131424 | chr12 | South Shore | 0.463293875 | 0.793323705 | 0.3300298 | 0.029149 |
| cg01519695 | chr12 | Open Sea    | 0.421647255 | 0.750990674 | 0.3293434 | 0.00015  |
| cg13575885 | chr12 | Open Sea    | 0.55076154  | 0.879375048 | 0.3286135 | 7.06E-07 |
| cg07725829 | chr12 | Open Sea    | 0.523384545 | 0.851060075 | 0.3276755 | 0.000458 |
| cg11243173 | chr12 | Open Sea    | 0.55541705  | 0.88250735  | 0.3270903 | 0.000621 |
| cg14909213 | chr12 | Open Sea    | 0.508234542 | 0.835243219 | 0.3270087 | 1.06E-05 |
| cg15915361 | chr12 | Open Sea    | 0.584658524 | 0.911654349 | 0.3269958 | 9.5E-08  |
| cg11130955 | chr12 | Open Sea    | 0.508732158 | 0.834262574 | 0.3255304 | 1.23E-06 |
| cg21173150 | chr12 | Open Sea    | 0.592758115 | 0.918109094 | 0.325351  | 3.39E-06 |
| cg03389789 | chr12 | Open Sea    | 0.450981844 | 0.775978348 | 0.3249965 | 0.000742 |
| cg06697057 | chr12 | Open Sea    | 0.560628907 | 0.885121618 | 0.3244927 | 0.000771 |
| cg11054192 | chr12 | Open Sea    | 0.50205955  | 0.826173496 | 0.3241139 | 0.001038 |
| cg01493728 | chr12 | Open Sea    | 0.401108286 | 0.72450509  | 0.3233968 | 0.033239 |
| cg14679607 | chr12 | Open Sea    | 0.46895113  | 0.792098886 | 0.3231478 | 2.3E-05  |
| cg04907218 | chr12 | North Shore | 0.508307192 | 0.83029756  | 0.3219904 | 9.23E-07 |
| cg23363039 | chr12 | Open Sea    | 0.401143665 | 0.722683932 | 0.3215403 | 5.71E-06 |

|            |       |             |             |             |           |          |
|------------|-------|-------------|-------------|-------------|-----------|----------|
| cg19109601 | chr12 | South Shelf | 0.498266761 | 0.81893668  | 0.3206699 | 0.000888 |
| cg05513274 | chr12 | Open Sea    | 0.479823924 | 0.800365167 | 0.3205412 | 0.004343 |
| cg21913301 | chr12 | Open Sea    | 0.369004833 | 0.689279523 | 0.3202747 | 0.000486 |
| cg05557291 | chr12 | Open Sea    | 0.604553184 | 0.922425517 | 0.3178723 | 5.26E-06 |
| cg14858786 | chr12 | North Shore | 0.573535331 | 0.891367484 | 0.3178322 | 3.89E-06 |
| cg16409977 | chr12 | Open Sea    | 0.517778997 | 0.835351915 | 0.3175729 | 1.16E-07 |
| cg16006349 | chr12 | Island      | 0.303879232 | 0.621256097 | 0.3173769 | 0.001267 |
| cg14761514 | chr12 | Open Sea    | 0.335570346 | 0.652716865 | 0.3171465 | 0.021209 |
| cg12115748 | chr12 | Open Sea    | 0.362007924 | 0.6787885   | 0.3167806 | 0.036239 |
| cg18827107 | chr12 | Open Sea    | 0.534017105 | 0.850711734 | 0.3166946 | 4.02E-05 |
| cg10520543 | chr12 | Open Sea    | 0.373950089 | 0.690341521 | 0.3163914 | 0.000179 |
| cg05529922 | chr12 | Open Sea    | 0.587686643 | 0.903126743 | 0.3154401 | 4.85E-07 |
| cg03739877 | chr12 | Open Sea    | 0.478489852 | 0.793876853 | 0.315387  | 9.48E-07 |
| cg08129310 | chr12 | Open Sea    | 0.59470237  | 0.90998336  | 0.315281  | 2.97E-05 |
| cg05957190 | chr12 | Open Sea    | 0.61369738  | 0.927909621 | 0.3142122 | 4.18E-05 |
| cg03064524 | chr12 | Open Sea    | 0.602208003 | 0.915976845 | 0.3137688 | 1E-05    |
| cg14738823 | chr12 | Open Sea    | 0.47445157  | 0.787792093 | 0.3133405 | 0.013642 |
| cg10216717 | chr12 | North Shore | 0.408886836 | 0.721723821 | 0.312837  | 0.002108 |
| cg13929106 | chr12 | Open Sea    | 0.593140118 | 0.905502354 | 0.3123622 | 4.58E-05 |
| cg11053466 | chr12 | North Shore | 0.378993902 | 0.691131897 | 0.312138  | 2.27E-08 |
| cg26227465 | chr12 | Open Sea    | 0.514687682 | 0.826400273 | 0.3117126 | 3.55E-05 |
| cg26851803 | chr12 | Open Sea    | 0.592279743 | 0.903671196 | 0.3113915 | 2.58E-05 |
| cg01650245 | chr12 | North Shelf | 0.555551459 | 0.865832787 | 0.3102813 | 3.14E-08 |
| cg14879569 | chr12 | Open Sea    | 0.610213727 | 0.920058772 | 0.309845  | 2.73E-06 |
| cg03437151 | chr12 | Open Sea    | 0.430475448 | 0.74030135  | 0.3098259 | 3.71E-06 |
| cg20745888 | chr12 | Open Sea    | 0.567318235 | 0.876194613 | 0.3088764 | 5.38E-06 |
| cg12901574 | chr12 | North Shelf | 0.525487363 | 0.833369665 | 0.3078823 | 0.002891 |
| cg17472736 | chr12 | Open Sea    | 0.5290046   | 0.83605209  | 0.3070475 | 0.000232 |
| cg13220569 | chr12 | South Shore | 0.535439458 | 0.842154344 | 0.3067149 | 0.001529 |
| cg01687040 | chr12 | Open Sea    | 0.452057678 | 0.758471435 | 0.3064138 | 0.006356 |
| cg15920335 | chr12 | North Shelf | 0.57126775  | 0.877675738 | 0.306408  | 9.89E-06 |
| cg25953788 | chr12 | Open Sea    | 0.331047185 | 0.637223223 | 0.306176  | 0.004457 |
| cg05399225 | chr12 | North Shore | 0.532776395 | 0.838785591 | 0.3060092 | 0.007864 |
| cg24510285 | chr12 | Open Sea    | 0.57637159  | 0.882166803 | 0.3057952 | 3.67E-07 |
| cg12929809 | chr12 | Open Sea    | 0.598718118 | 0.904034446 | 0.3053163 | 0.000468 |
| cg04076774 | chr12 | Open Sea    | 0.570512794 | 0.875788752 | 0.305276  | 0.040243 |
| cg14555736 | chr12 | South Shelf | 0.551051081 | 0.855859552 | 0.3048085 | 6.89E-05 |
| cg04475095 | chr12 | Open Sea    | 0.576516392 | 0.880972625 | 0.3044562 | 8.08E-05 |
| cg22851485 | chr12 | South Shore | 0.213185257 | 0.517580826 | 0.3043956 | 0.007974 |
| cg09358376 | chr12 | Open Sea    | 0.352986643 | 0.657046512 | 0.3040599 | 0.007525 |
| cg27170427 | chr12 | Open Sea    | 0.537946284 | 0.838507232 | 0.3005609 | 2.94E-05 |
| cg09802076 | chr12 | Open Sea    | 0.35947462  | 0.659701172 | 0.3002266 | 0.000418 |
| cg03755957 | chr12 | South Shelf | 0.540824293 | 0.840426533 | 0.2996022 | 0.002791 |
| cg06705947 | chr12 | Open Sea    | 0.523632186 | 0.82279645  | 0.2991643 | 6.49E-05 |
| cg24795867 | chr12 | North Shelf | 0.597929141 | 0.896441957 | 0.2985128 | 0.005977 |
| cg20023647 | chr12 | Open Sea    | 0.53389943  | 0.832097476 | 0.298198  | 0.001632 |
| cg09171368 | chr12 | Open Sea    | 0.485111892 | 0.782960714 | 0.2978488 | 0.041874 |
| cg24226884 | chr12 | Open Sea    | 0.517767071 | 0.814541231 | 0.2967742 | 0.002061 |
| cg00079219 | chr12 | North Shore | 0.157118111 | 0.4536593   | 0.2965412 | 0.008043 |
| cg21721825 | chr12 | North Shore | 0.36885583  | 0.665104566 | 0.2962487 | 1.48E-05 |

|            |       |             |             |             |           |          |
|------------|-------|-------------|-------------|-------------|-----------|----------|
| cg02965092 | chr12 | Open Sea    | 0.506918456 | 0.802855078 | 0.2959366 | 0.005423 |
| cg10810769 | chr12 | Open Sea    | 0.576568457 | 0.871691902 | 0.2951234 | 4.74E-05 |
| cg09629675 | chr12 | Open Sea    | 0.336021059 | 0.630035445 | 0.2940144 | 0.021446 |
| cg22403469 | chr12 | South Shelf | 0.636447794 | 0.930121859 | 0.2936741 | 3.37E-05 |
| cg26211060 | chr12 | Open Sea    | 0.384790504 | 0.677603643 | 0.2928131 | 0.004671 |
| cg23518497 | chr12 | Open Sea    | 0.606490809 | 0.899221311 | 0.2927305 | 1.22E-05 |
| cg10168009 | chr12 | South Shelf | 0.588712116 | 0.881237291 | 0.2925252 | 1.72E-05 |
| cg07051221 | chr12 | North Shore | 0.390898026 | 0.683073744 | 0.2921757 | 0.001539 |
| cg02389938 | chr12 | Open Sea    | 0.610840222 | 0.902747461 | 0.2919072 | 0.00024  |
| cg22781714 | chr12 | Open Sea    | 0.509548106 | 0.801289597 | 0.2917415 | 0.021119 |
| cg02467451 | chr12 | South Shore | 0.35236209  | 0.643482011 | 0.2911199 | 3.31E-06 |
| cg04409030 | chr12 | North Shore | 0.540593307 | 0.831263645 | 0.2906703 | 0.001031 |
| cg08716684 | chr12 | North Shore | 0.481604092 | 0.772235579 | 0.2906315 | 0.010772 |
| cg11854928 | chr12 | Open Sea    | 0.553061058 | 0.843124507 | 0.2900634 | 0.003092 |
| cg15693299 | chr12 | Open Sea    | 0.482296873 | 0.771671309 | 0.2893744 | 7.59E-05 |
| cg06100618 | chr12 | Open Sea    | 0.571280553 | 0.859169897 | 0.2878893 | 0.001129 |
| cg08752433 | chr12 | North Shelf | 0.364743809 | 0.652586401 | 0.2878426 | 0.000112 |
| cg02520593 | chr12 | Open Sea    | 0.602335728 | 0.890055255 | 0.2877195 | 9.34E-06 |
| cg02505216 | chr12 | Open Sea    | 0.55341403  | 0.840983379 | 0.2875693 | 8.96E-07 |
| cg20046777 | chr12 | Open Sea    | 0.580367069 | 0.867791888 | 0.2874248 | 0.020443 |
| cg06343745 | chr12 | South Shelf | 0.393778712 | 0.680304247 | 0.2865255 | 0.01101  |
| cg16354452 | chr12 | Open Sea    | 0.546837309 | 0.833271968 | 0.2864347 | 0.041781 |
| cg04581537 | chr12 | North Shelf | 0.530151808 | 0.815912578 | 0.2857608 | 1.9E-05  |
| cg06296759 | chr12 | Open Sea    | 0.554563533 | 0.839137944 | 0.2845744 | 0.006537 |
| cg25341089 | chr12 | Island      | 0.610726649 | 0.895053435 | 0.2843268 | 0.001186 |
| cg23980176 | chr12 | Open Sea    | 0.618741344 | 0.902889385 | 0.284148  | 2.21E-05 |
| cg20047677 | chr12 | Open Sea    | 0.560654399 | 0.844704636 | 0.2840502 | 0.00497  |
| cg00598394 | chr12 | North Shelf | 0.558839313 | 0.84228602  | 0.2834467 | 0.032456 |
| cg25125340 | chr12 | South Shore | 0.515156623 | 0.798599138 | 0.2834425 | 0.005853 |
| cg13023619 | chr12 | Open Sea    | 0.514146232 | 0.797478889 | 0.2833327 | 0.042499 |
| cg03600605 | chr12 | South Shore | 0.502513637 | 0.785731827 | 0.2832182 | 0.012752 |
| cg03433362 | chr12 | Open Sea    | 0.647230197 | 0.930325212 | 0.283095  | 2.46E-05 |
| cg14240993 | chr12 | North Shore | 0.558544523 | 0.84123631  | 0.2826918 | 1.88E-05 |
| cg21474838 | chr12 | Open Sea    | 0.535035972 | 0.817385211 | 0.2823492 | 0.003057 |
| cg25598488 | chr12 | North Shelf | 0.618247202 | 0.900569501 | 0.2823223 | 4.56E-05 |
| cg13209739 | chr12 | Open Sea    | 0.531675829 | 0.813938224 | 0.2822624 | 3.59E-05 |
| cg06638147 | chr12 | Open Sea    | 0.341886966 | 0.624029972 | 0.282143  | 0.031357 |
| cg01152727 | chr12 | South Shelf | 0.628752841 | 0.90999657  | 0.2812437 | 2.29E-06 |
| cg16237191 | chr12 | Open Sea    | 0.329854331 | 0.610081529 | 0.2802272 | 0.023946 |
| cg17127146 | chr12 | Open Sea    | 0.616703029 | 0.896714653 | 0.2800116 | 8.08E-05 |
| cg23253053 | chr12 | Open Sea    | 0.38521684  | 0.665197176 | 0.2799803 | 0.045991 |
| cg23313416 | chr12 | Open Sea    | 0.642679423 | 0.922290061 | 0.2796106 | 4.08E-06 |
| cg21074190 | chr12 | North Shore | 0.622123679 | 0.90039287  | 0.2782692 | 2.29E-05 |
| cg13300744 | chr12 | Open Sea    | 0.491525145 | 0.768423593 | 0.2768984 | 0.005258 |
| cg09892273 | chr12 | South Shore | 0.472270101 | 0.749126086 | 0.276856  | 0.004092 |
| cg17116178 | chr12 | Open Sea    | 0.574365868 | 0.85090665  | 0.2765408 | 0.002283 |
| cg02023138 | chr12 | Open Sea    | 0.510491407 | 0.786845616 | 0.2763542 | 0.045596 |
| cg22682646 | chr12 | Open Sea    | 0.523361301 | 0.798560435 | 0.2751991 | 6.18E-05 |
| cg11654321 | chr12 | Open Sea    | 0.435878063 | 0.710304795 | 0.2744267 | 1.6E-06  |
| cg27160701 | chr12 | Open Sea    | 0.592320395 | 0.866420837 | 0.2741004 | 7.49E-06 |

|            |       |             |             |             |           |          |
|------------|-------|-------------|-------------|-------------|-----------|----------|
| cg23897083 | chr12 | Open Sea    | 0.438114447 | 0.712029002 | 0.2739146 | 0.005785 |
| cg08446539 | chr12 | South Shelf | 0.623011244 | 0.896748765 | 0.2737375 | 4.21E-06 |
| cg01871722 | chr12 | Open Sea    | 0.515366477 | 0.788851893 | 0.2734854 | 0.008091 |
| cg00873953 | chr12 | Open Sea    | 0.555099584 | 0.82782699  | 0.2727274 | 1.78E-05 |
| cg00174508 | chr12 | Open Sea    | 0.530944406 | 0.803534962 | 0.2725906 | 9.86E-06 |
| cg02767665 | chr12 | South Shore | 0.286405071 | 0.558892848 | 0.2724878 | 6.89E-05 |
| cg17202013 | chr12 | South Shelf | 0.399740663 | 0.671583047 | 0.2718424 | 0.008033 |
| cg13945631 | chr12 | Open Sea    | 0.601992247 | 0.873550082 | 0.2715578 | 2.95E-05 |
| cg26483075 | chr12 | Open Sea    | 0.498721021 | 0.770216835 | 0.2714958 | 1.32E-07 |
| cg23162479 | chr12 | Open Sea    | 0.279399125 | 0.550737551 | 0.2713384 | 0.02644  |
| cg09265762 | chr12 | Open Sea    | 0.555940812 | 0.826623967 | 0.2706832 | 0.008836 |
| cg16845679 | chr12 | Open Sea    | 0.596740477 | 0.866884894 | 0.2701444 | 3.63E-06 |
| cg01202639 | chr12 | Open Sea    | 0.527432847 | 0.797400906 | 0.2699681 | 0.00015  |
| cg09313140 | chr12 | Open Sea    | 0.587031952 | 0.856816961 | 0.269785  | 0.001784 |
| cg01993111 | chr12 | South Shelf | 0.511413193 | 0.781087719 | 0.2696745 | 0.010643 |
| cg14258504 | chr12 | Open Sea    | 0.603428159 | 0.872083405 | 0.2686552 | 2.84E-05 |
| cg06937491 | chr12 | Open Sea    | 0.647754988 | 0.91621672  | 0.2684617 | 0.000507 |
| cg13953394 | chr12 | Open Sea    | 0.645934445 | 0.913787504 | 0.2678531 | 0.000156 |
| cg04303901 | chr12 | Open Sea    | 0.639190694 | 0.90634046  | 0.2671498 | 6.42E-05 |
| cg16086237 | chr12 | Open Sea    | 0.254128799 | 0.521121733 | 0.2669929 | 0.00509  |
| cg25161912 | chr12 | South Shore | 0.382994778 | 0.649966088 | 0.2669713 | 0.02915  |
| cg26215982 | chr12 | North Shelf | 0.376352274 | 0.643255408 | 0.2669031 | 0.000107 |
| cg20959403 | chr12 | Open Sea    | 0.302355581 | 0.569005484 | 0.2666499 | 3.08E-06 |
| cg26491818 | chr12 | Open Sea    | 0.577571242 | 0.843263957 | 0.2656927 | 0.000446 |
| cg00693222 | chr12 | Open Sea    | 0.59747396  | 0.86284737  | 0.2653734 | 0.003477 |
| cg06538684 | chr12 | South Shore | 0.260512849 | 0.525271374 | 0.2647585 | 3.08E-05 |
| cg25372195 | chr12 | Open Sea    | 0.502965473 | 0.767634648 | 0.2646692 | 5.15E-06 |
| cg22827685 | chr12 | Open Sea    | 0.594188374 | 0.858690729 | 0.2645024 | 0.003828 |
| cg17865265 | chr12 | Open Sea    | 0.401572932 | 0.665386719 | 0.2638138 | 0.000162 |
| cg23755033 | chr12 | Open Sea    | 0.587410375 | 0.850646944 | 0.2632366 | 0.000833 |
| cg24504361 | chr12 | South Shore | 0.338268666 | 0.601223358 | 0.2629547 | 0.000156 |
| cg21041701 | chr12 | North Shelf | 0.573853126 | 0.836799385 | 0.2629463 | 0.037934 |
| cg17734698 | chr12 | Open Sea    | 0.377870653 | 0.640269419 | 0.2623988 | 0.026421 |
| cg27537972 | chr12 | Open Sea    | 0.505875347 | 0.767552673 | 0.2616773 | 0.027332 |
| cg03037879 | chr12 | Open Sea    | 0.529097114 | 0.79075584  | 0.2616587 | 0.044138 |
| cg11311280 | chr12 | Open Sea    | 0.560323397 | 0.821909479 | 0.2615861 | 0.029174 |
| cg03846107 | chr12 | Open Sea    | 0.413495789 | 0.67422631  | 0.2607305 | 0.012476 |
| cg08245989 | chr12 | Open Sea    | 0.496437155 | 0.75688493  | 0.2604478 | 1.6E-06  |
| cg03212453 | chr12 | North Shelf | 0.627733336 | 0.887536537 | 0.2598032 | 3.76E-07 |
| cg04473405 | chr12 | South Shore | 0.426062847 | 0.685537766 | 0.2594749 | 0.034671 |
| cg21252529 | chr12 | South Shelf | 0.656598817 | 0.91509818  | 0.2584994 | 0.000598 |
| cg20059881 | chr12 | South Shelf | 0.521503924 | 0.779063938 | 0.25756   | 0.001674 |
| cg12555810 | chr12 | Open Sea    | 0.385100216 | 0.64180897  | 0.2567088 | 0.046225 |
| cg05383657 | chr12 | Open Sea    | 0.442904191 | 0.699563691 | 0.2566595 | 0.014413 |
| cg09170112 | chr12 | Open Sea    | 0.543446875 | 0.800048414 | 0.2566015 | 0.003898 |
| cg10841138 | chr12 | Open Sea    | 0.609359583 | 0.865789033 | 0.2564295 | 0.015755 |
| cg16614527 | chr12 | Open Sea    | 0.675974647 | 0.932379562 | 0.2564049 | 1.97E-05 |
| cg08826184 | chr12 | Open Sea    | 0.550574109 | 0.806740331 | 0.2561662 | 0.000128 |
| cg14034782 | chr12 | North Shelf | 0.460861338 | 0.716803727 | 0.2559424 | 0.011599 |
| cg16531955 | chr12 | Open Sea    | 0.592996504 | 0.848717986 | 0.2557215 | 0.017683 |

|            |       |             |             |             |           |          |
|------------|-------|-------------|-------------|-------------|-----------|----------|
| cg24770677 | chr12 | Open Sea    | 0.659135131 | 0.914671378 | 0.2555362 | 0.000393 |
| cg06542302 | chr12 | South Shore | 0.660073375 | 0.914853352 | 0.25478   | 7.81E-05 |
| cg19710323 | chr12 | North Shore | 0.486275962 | 0.740576839 | 0.2543009 | 7.85E-06 |
| cg00770443 | chr12 | Open Sea    | 0.48156571  | 0.735697766 | 0.2541321 | 0.02096  |
| cg02410245 | chr12 | North Shore | 0.529017254 | 0.783103998 | 0.2540867 | 1.53E-06 |
| cg04041679 | chr12 | North Shelf | 0.529976688 | 0.78388473  | 0.253908  | 0.002422 |
| cg04740359 | chr12 | North Shore | 0.484598355 | 0.737488665 | 0.2528903 | 0.004033 |
| cg23521666 | chr12 | North Shore | 0.608691646 | 0.860849374 | 0.2521577 | 0.007057 |
| cg24085426 | chr12 | Open Sea    | 0.642412353 | 0.894317102 | 0.2519047 | 0.001834 |
| cg10612692 | chr12 | South Shelf | 0.468793293 | 0.719434617 | 0.2506413 | 0.006203 |
| cg06002516 | chr12 | Open Sea    | 0.53009502  | 0.780194522 | 0.2500995 | 0.043163 |
| cg08822023 | chr12 | South Shelf | 0.618381209 | 0.868447539 | 0.2500663 | 0.000516 |
| cg03954343 | chr12 | Open Sea    | 0.603128754 | 0.853086183 | 0.2499574 | 0.000866 |
| cg22963843 | chr12 | Open Sea    | 0.599911003 | 0.84915526  | 0.2492443 | 0.000129 |
| cg15238831 | chr12 | Open Sea    | 0.583746869 | 0.832385728 | 0.2486389 | 0.000117 |
| cg06738652 | chr12 | South Shelf | 0.612800321 | 0.860565508 | 0.2477652 | 0.036417 |
| cg07071478 | chr12 | Open Sea    | 0.621866012 | 0.86926029  | 0.2473943 | 0.001105 |
| cg11649665 | chr12 | Open Sea    | 0.644693484 | 0.891951211 | 0.2472577 | 0.000297 |
| cg09741713 | chr12 | Open Sea    | 0.384509588 | 0.630968764 | 0.2464592 | 0.001847 |
| cg18846954 | chr12 | Open Sea    | 0.626883117 | 0.873257525 | 0.2463744 | 0.003079 |
| cg16332003 | chr12 | South Shelf | 0.635083083 | 0.881067643 | 0.2459846 | 8.73E-05 |
| cg11848173 | chr12 | North Shore | 0.290540281 | 0.535774224 | 0.2452339 | 0.030644 |
| cg21233675 | chr12 | North Shore | 0.451763804 | 0.696904115 | 0.2451403 | 0.000381 |
| cg07880109 | chr12 | Open Sea    | 0.468170629 | 0.712436872 | 0.2442662 | 0.000708 |
| cg19834585 | chr12 | Island      | 0.583637623 | 0.827647612 | 0.24401   | 5.64E-06 |
| cg16933248 | chr12 | South Shore | 0.589587213 | 0.833365972 | 0.2437788 | 0.000345 |
| cg02662495 | chr12 | Open Sea    | 0.32463809  | 0.5683195   | 0.2436814 | 2.25E-07 |
| cg19685709 | chr12 | North Shelf | 0.449141336 | 0.692037444 | 0.2428961 | 0.000254 |
| cg03143347 | chr12 | North Shelf | 0.547599881 | 0.790456029 | 0.2428561 | 6.96E-05 |
| cg03325843 | chr12 | Open Sea    | 0.657385016 | 0.900075218 | 0.2426902 | 0.001071 |
| cg15016120 | chr12 | Open Sea    | 0.419842169 | 0.66245571  | 0.2426135 | 9.77E-06 |
| cg20408175 | chr12 | North Shore | 0.218330176 | 0.460156349 | 0.2418262 | 4.92E-05 |
| cg22538757 | chr12 | Open Sea    | 0.426634832 | 0.667949578 | 0.2413147 | 0.000981 |
| cg25165908 | chr12 | South Shore | 0.590716588 | 0.831989967 | 0.2412734 | 0.016259 |
| cg02575764 | chr12 | Open Sea    | 0.60725713  | 0.84852064  | 0.2412635 | 0.010707 |
| cg16184597 | chr12 | South Shore | 0.612894797 | 0.853921305 | 0.2410265 | 0.045699 |
| cg03219658 | chr12 | Open Sea    | 0.635992497 | 0.876990316 | 0.2409978 | 0.000556 |
| cg21671052 | chr12 | Open Sea    | 0.375890172 | 0.616883591 | 0.2409934 | 0.025615 |
| cg23157948 | chr12 | North Shore | 0.698505914 | 0.938386516 | 0.2398806 | 0.000118 |
| cg06826870 | chr12 | Open Sea    | 0.594145759 | 0.833965009 | 0.2398192 | 0.000286 |
| cg10504573 | chr12 | Open Sea    | 0.587792083 | 0.827085653 | 0.2392936 | 0.004788 |
| cg10255904 | chr12 | Open Sea    | 0.497833207 | 0.736904394 | 0.2390712 | 0.026876 |
| cg12166080 | chr12 | Open Sea    | 0.663033065 | 0.902102748 | 0.2390697 | 5.7E-05  |
| cg16009120 | chr12 | Open Sea    | 0.627341217 | 0.86598158  | 0.2386404 | 0.002937 |
| cg27501686 | chr12 | Open Sea    | 0.645001147 | 0.88347844  | 0.2384773 | 0.000177 |
| cg00852595 | chr12 | Open Sea    | 0.62379275  | 0.862107435 | 0.2383147 | 0.002124 |
| cg04919982 | chr12 | Open Sea    | 0.511762002 | 0.749473907 | 0.2377119 | 2.62E-05 |
| cg15545660 | chr12 | Open Sea    | 0.647106506 | 0.884585148 | 0.2374786 | 1.59E-05 |
| cg07092157 | chr12 | Open Sea    | 0.591392283 | 0.828623957 | 0.2372317 | 0.008708 |
| cg06617217 | chr12 | North Shore | 0.541945398 | 0.778969139 | 0.2370237 | 0.046665 |

|            |       |             |             |             |           |          |
|------------|-------|-------------|-------------|-------------|-----------|----------|
| cg09647921 | chr12 | Open Sea    | 0.629692983 | 0.866596825 | 0.2369038 | 0.000381 |
| cg20576002 | chr12 | Open Sea    | 0.649688531 | 0.886503226 | 0.2368147 | 3.08E-05 |
| cg10941424 | chr12 | Open Sea    | 0.516705237 | 0.753395781 | 0.2366905 | 0.011071 |
| cg23916979 | chr12 | Open Sea    | 0.623239239 | 0.859868464 | 0.2366292 | 0.017322 |
| cg17352891 | chr12 | Open Sea    | 0.640098725 | 0.876632949 | 0.2365342 | 0.000312 |
| cg26257969 | chr12 | North Shore | 0.666320753 | 0.902745177 | 0.2364244 | 4.57E-05 |
| cg21844669 | chr12 | North Shore | 0.673723672 | 0.909916164 | 0.2361925 | 0.001215 |
| cg08464009 | chr12 | Open Sea    | 0.666449441 | 0.901492178 | 0.2350427 | 5.98E-05 |
| cg22463035 | chr12 | Island      | 0.658407873 | 0.893018139 | 0.2346103 | 6.98E-05 |
| cg18674828 | chr12 | South Shore | 0.61164217  | 0.845365849 | 0.2337237 | 0.000286 |
| cg09211256 | chr12 | Open Sea    | 0.569135329 | 0.802708468 | 0.2335731 | 2.58E-06 |
| cg21801223 | chr12 | Open Sea    | 0.685542198 | 0.919068678 | 0.2335265 | 0.000269 |
| cg24009650 | chr12 | North Shore | 0.530477847 | 0.763464984 | 0.2329871 | 0.003865 |
| cg21372174 | chr12 | Open Sea    | 0.637010716 | 0.86999295  | 0.2329822 | 0.000347 |
| cg25044701 | chr12 | Open Sea    | 0.524982754 | 0.757957136 | 0.2329744 | 5.92E-06 |
| cg25313447 | chr12 | Open Sea    | 0.64799703  | 0.880883967 | 0.2328869 | 4.77E-05 |
| cg05404091 | chr12 | North Shelf | 0.553364933 | 0.786230012 | 0.2328651 | 0.036642 |
| cg00915830 | chr12 | Open Sea    | 0.607852428 | 0.840640105 | 0.2327877 | 0.027767 |
| cg00991744 | chr12 | North Shore | 0.590639371 | 0.823096257 | 0.2324569 | 0.005494 |
| cg02049373 | chr12 | Open Sea    | 0.651546079 | 0.883674651 | 0.2321286 | 0.003949 |
| cg10354655 | chr12 | Open Sea    | 0.649390722 | 0.881072306 | 0.2316816 | 0.000911 |
| cg25887789 | chr12 | North Shore | 0.61864546  | 0.849812916 | 0.2311675 | 0.023185 |
| cg17341136 | chr12 | North Shelf | 0.568292103 | 0.799147056 | 0.230855  | 0.000784 |
| cg08974852 | chr12 | Open Sea    | 0.409747162 | 0.640289784 | 0.2305426 | 0.000572 |
| cg25799797 | chr12 | Open Sea    | 0.518720679 | 0.74908859  | 0.2303679 | 0.017147 |
| cg01525976 | chr12 | Open Sea    | 0.653002948 | 0.882989033 | 0.2299861 | 0.003097 |
| cg07643942 | chr12 | Open Sea    | 0.583469379 | 0.813030677 | 0.2295613 | 0.029021 |
| cg24035682 | chr12 | Open Sea    | 0.703386231 | 0.932515624 | 0.2291294 | 3.96E-05 |
| cg16207347 | chr12 | South Shore | 0.638591328 | 0.86731052  | 0.2287192 | 0.000215 |
| cg17080335 | chr12 | Open Sea    | 0.504206783 | 0.732923351 | 0.2287166 | 0.009617 |
| cg01401465 | chr12 | Open Sea    | 0.668065124 | 0.896630577 | 0.2285655 | 0.000353 |
| cg06761873 | chr12 | Open Sea    | 0.702549741 | 0.931084445 | 0.2285347 | 0.000218 |
| cg24129177 | chr12 | Open Sea    | 0.503826923 | 0.731646346 | 0.2278194 | 1E-06    |
| cg27349244 | chr12 | Open Sea    | 0.715033617 | 0.942837059 | 0.2278034 | 6.35E-05 |
| cg03756485 | chr12 | Open Sea    | 0.329371318 | 0.556808487 | 0.2274372 | 0.005028 |
| cg02313013 | chr12 | Open Sea    | 0.383854885 | 0.610606922 | 0.226752  | 0.026211 |
| cg23549179 | chr12 | Open Sea    | 0.662213829 | 0.888738783 | 0.226525  | 0.000409 |
| cg20519577 | chr12 | Island      | 0.670559912 | 0.896221146 | 0.2256612 | 0.000525 |
| cg19666225 | chr12 | Open Sea    | 0.610799336 | 0.836238559 | 0.2254392 | 0.046481 |
| cg21649668 | chr12 | Open Sea    | 0.655753572 | 0.88088218  | 0.2251286 | 0.01234  |
| cg07102229 | chr12 | Open Sea    | 0.608641013 | 0.833000283 | 0.2243593 | 0.003472 |
| cg24975581 | chr12 | South Shelf | 0.624884013 | 0.849093524 | 0.2242095 | 0.006836 |
| cg27137084 | chr12 | Open Sea    | 0.481590751 | 0.704686045 | 0.2230953 | 0.027166 |
| cg18616923 | chr12 | Open Sea    | 0.374926654 | 0.597831891 | 0.2229052 | 0.003308 |
| cg01299925 | chr12 | Open Sea    | 0.658211221 | 0.88054757  | 0.2223363 | 2.94E-05 |
| cg04640729 | chr12 | North Shelf | 0.611648934 | 0.833946622 | 0.2222977 | 0.023926 |
| cg14746717 | chr12 | South Shore | 0.646164362 | 0.868427049 | 0.2222627 | 0.043476 |
| cg26958741 | chr12 | Open Sea    | 0.604758333 | 0.826303825 | 0.2215455 | 0.019485 |
| cg11943883 | chr12 | Open Sea    | 0.609687732 | 0.831057079 | 0.2213693 | 0.00178  |
| cg18237191 | chr12 | North Shelf | 0.621794833 | 0.842717874 | 0.220923  | 0.002787 |

|            |       |             |             |             |           |          |
|------------|-------|-------------|-------------|-------------|-----------|----------|
| cg25886621 | chr12 | Open Sea    | 0.669516949 | 0.890159495 | 0.2206425 | 0.0005   |
| cg19890059 | chr12 | Open Sea    | 0.701711491 | 0.921818921 | 0.2201074 | 0.001293 |
| cg15961105 | chr12 | Open Sea    | 0.692245567 | 0.911923985 | 0.2196784 | 0.000407 |
| cg24700929 | chr12 | South Shelf | 0.50023479  | 0.719645362 | 0.2194106 | 0.00176  |
| cg06233731 | chr12 | Open Sea    | 0.620973724 | 0.840091766 | 0.219118  | 0.014573 |
| cg19084629 | chr12 | Open Sea    | 0.712544202 | 0.931634353 | 0.2190902 | 0.000372 |
| cg25463779 | chr12 | Open Sea    | 0.526164666 | 0.745193539 | 0.2190289 | 3.28E-05 |
| cg13554242 | chr12 | Open Sea    | 0.620493629 | 0.839501494 | 0.2190079 | 0.004329 |
| cg21272713 | chr12 | North Shelf | 0.490507857 | 0.70926361  | 0.2187558 | 0.010774 |
| cg23782909 | chr12 | Open Sea    | 0.371095507 | 0.589263782 | 0.2181683 | 0.002417 |
| cg18044622 | chr12 | South Shore | 0.687431235 | 0.905444677 | 0.2180134 | 2.73E-05 |
| cg03611241 | chr12 | South Shore | 0.397228905 | 0.614928187 | 0.2176993 | 0.016105 |
| cg09154414 | chr12 | Open Sea    | 0.689174152 | 0.906829049 | 0.2176549 | 0.000807 |
| cg15736336 | chr12 | Open Sea    | 0.643720132 | 0.861372    | 0.2176519 | 0.004421 |
| cg01517148 | chr12 | Open Sea    | 0.653265865 | 0.870802579 | 0.2175367 | 0.009078 |
| cg13614229 | chr12 | Open Sea    | 0.665631218 | 0.882972949 | 0.2173417 | 0.000168 |
| cg19427600 | chr12 | Open Sea    | 0.704327612 | 0.921282326 | 0.2169547 | 0.000192 |
| cg20246277 | chr12 | Open Sea    | 0.718500793 | 0.935443124 | 0.2169423 | 0.000688 |
| cg16499474 | chr12 | Open Sea    | 0.655377628 | 0.872309228 | 0.2169316 | 0.002187 |
| cg04080448 | chr12 | Open Sea    | 0.54807053  | 0.764351375 | 0.2162808 | 0.018356 |
| cg24969187 | chr12 | North Shore | 0.626123668 | 0.841856327 | 0.2157327 | 0.000398 |
| cg08723248 | chr12 | Open Sea    | 0.684439744 | 0.900124016 | 0.2156843 | 0.000449 |
| cg17651760 | chr12 | North Shelf | 0.662317406 | 0.877473082 | 0.2151557 | 0.003613 |
| cg07053177 | chr12 | Island      | 0.673007198 | 0.887536509 | 0.2145293 | 0.036298 |
| cg04739485 | chr12 | Open Sea    | 0.739172717 | 0.953602957 | 0.2144302 | 2.74E-05 |
| cg15962965 | chr12 | South Shore | 0.628799612 | 0.842124871 | 0.2133253 | 0.002269 |
| cg06624951 | chr12 | North Shore | 0.418619189 | 0.631836279 | 0.2132171 | 0.036419 |
| cg26373351 | chr12 | Open Sea    | 0.662126658 | 0.875285209 | 0.2131586 | 0.000206 |
| cg10582941 | chr12 | Open Sea    | 0.590211012 | 0.802978314 | 0.2127673 | 0.001667 |
| cg27258486 | chr12 | Open Sea    | 0.720177542 | 0.932801186 | 0.2126236 | 7.97E-05 |
| cg25055341 | chr12 | Open Sea    | 0.594801434 | 0.807365696 | 0.2125643 | 0.033284 |
| cg27547422 | chr12 | North Shore | 0.670088557 | 0.882074971 | 0.2119864 | 0.033588 |
| cg10942227 | chr12 | Open Sea    | 0.566167141 | 0.777881286 | 0.2117141 | 0.005753 |
| cg18874332 | chr12 | Open Sea    | 0.35905817  | 0.570633042 | 0.2115749 | 0.005964 |
| cg01290565 | chr12 | Island      | 0.446898467 | 0.658467155 | 0.2115687 | 1.04E-05 |
| cg01807313 | chr12 | Open Sea    | 0.650237544 | 0.86138689  | 0.2111493 | 0.002224 |
| cg20001810 | chr12 | Open Sea    | 0.521480495 | 0.732530511 | 0.21105   | 0.009039 |
| cg09847584 | chr12 | Open Sea    | 0.715477548 | 0.926440935 | 0.2109634 | 0.000677 |
| cg26875655 | chr12 | North Shelf | 0.52239567  | 0.73334454  | 0.2109489 | 0.018588 |
| cg25054821 | chr12 | South Shelf | 0.500043928 | 0.710496981 | 0.2104531 | 0.000253 |
| cg21471511 | chr12 | Open Sea    | 0.722545417 | 0.932445351 | 0.2098999 | 0.000127 |
| cg12105679 | chr12 | South Shore | 0.696306274 | 0.905560983 | 0.2092547 | 0.000254 |
| cg25573386 | chr12 | Open Sea    | 0.412455786 | 0.621639256 | 0.2091835 | 0.000692 |
| cg13338132 | chr12 | Open Sea    | 0.638788979 | 0.847778427 | 0.2089894 | 0.000671 |
| cg22335340 | chr12 | South Shore | 0.625516357 | 0.834361108 | 0.2088448 | 0.025207 |
| cg27093379 | chr12 | Open Sea    | 0.707549939 | 0.915736558 | 0.2081866 | 0.000151 |
| cg08035981 | chr12 | Open Sea    | 0.68637942  | 0.89449703  | 0.2081176 | 0.00018  |
| cg14907262 | chr12 | South Shore | 0.701756418 | 0.909743728 | 0.2079873 | 0.000312 |
| cg13546321 | chr12 | Open Sea    | 0.525390934 | 0.733217665 | 0.2078267 | 0.017096 |
| cg22027151 | chr12 | Open Sea    | 0.690501933 | 0.897832201 | 0.2073303 | 0.000665 |



|            |       |             |             |             |           |          |
|------------|-------|-------------|-------------|-------------|-----------|----------|
| cg13074634 | chr12 | South Shore | 0.656408168 | 0.863690877 | 0.2072827 | 0.007265 |
| cg12617332 | chr12 | Open Sea    | 0.687406303 | 0.894498357 | 0.2070921 | 0.001773 |
| cg17537007 | chr12 | North Shore | 0.70119507  | 0.907755921 | 0.2065609 | 0.000155 |
| cg03404485 | chr12 | Open Sea    | 0.517182024 | 0.723502225 | 0.2063202 | 0.0051   |
| cg24445167 | chr12 | Open Sea    | 0.646637444 | 0.85267157  | 0.2060341 | 0.00594  |
| cg03200309 | chr12 | North Shore | 0.504590695 | 0.710468996 | 0.2058783 | 0.002118 |
| cg05214130 | chr12 | South Shelf | 0.693373004 | 0.899134275 | 0.2057613 | 0.000102 |
| cg22260016 | chr12 | North Shelf | 0.692336559 | 0.897999964 | 0.2056634 | 0.000436 |
| cg02068832 | chr12 | South Shore | 0.588441388 | 0.792184266 | 0.2037429 | 0.015794 |
| cg06764736 | chr12 | Open Sea    | 0.642521039 | 0.845708616 | 0.2031876 | 0.018438 |
| cg21758446 | chr12 | Open Sea    | 0.516955232 | 0.719969522 | 0.2030143 | 0.021195 |
| cg21656937 | chr12 | North Shelf | 0.265041997 | 0.467481909 | 0.2024399 | 0.012469 |
| cg13860283 | chr12 | Open Sea    | 0.346524671 | 0.548944833 | 0.2024202 | 0.042107 |
| cg20168964 | chr12 | Open Sea    | 0.500437069 | 0.702389154 | 0.2019521 | 0.021573 |
| cg08288107 | chr12 | Open Sea    | 0.752252497 | 0.954001065 | 0.2017486 | 0.000269 |
| cg20025970 | chr12 | Open Sea    | 0.601438507 | 0.803074287 | 0.2016358 | 0.046976 |
| cg12868312 | chr12 | Open Sea    | 0.689154754 | 0.890776624 | 0.2016219 | 0.014929 |
| cg12443853 | chr12 | Open Sea    | 0.485960122 | 0.687436701 | 0.2014766 | 0.007075 |
| cg06741096 | chr12 | Open Sea    | 0.665639463 | 0.866831009 | 0.2011915 | 0.000134 |
| cg27648793 | chr12 | Open Sea    | 0.567376026 | 0.768432401 | 0.2010564 | 0.00086  |
| cg09627757 | chr12 | Open Sea    | 0.716625371 | 0.917381147 | 0.2007558 | 3.68E-05 |
| cg03952361 | chr12 | North Shore | 0.635002896 | 0.835588494 | 0.2005856 | 0.004783 |
| cg27280332 | chr12 | Open Sea    | 0.693436671 | 0.893914601 | 0.2004779 | 0.000883 |
| cg09044656 | chr12 | Island      | 0.69265156  | 0.893090023 | 0.2004385 | 0.00039  |
| cg00390941 | chr12 | Open Sea    | 0.693387337 | 0.8936766   | 0.2002893 | 0.002474 |
| cg19699140 | chr13 | Open Sea    | 0.40154261  | 0.822492417 | 0.4209498 | 0.002886 |
| cg23976981 | chr13 | Open Sea    | 0.368955754 | 0.758927004 | 0.3899712 | 0.000273 |
| cg19871597 | chr13 | Open Sea    | 0.435686639 | 0.810172046 | 0.3744854 | 0.005839 |
| cg02291365 | chr13 | North Shelf | 0.250788866 | 0.621649122 | 0.3708603 | 0.000487 |
| cg23101680 | chr13 | Open Sea    | 0.288553081 | 0.655384246 | 0.3668312 | 0.001405 |
| cg06331700 | chr13 | Open Sea    | 0.50318313  | 0.868851837 | 0.3656687 | 7.88E-05 |
| cg15244467 | chr13 | Open Sea    | 0.546627514 | 0.907222777 | 0.3605953 | 2.8E-08  |
| cg10483660 | chr13 | South Shelf | 0.408449346 | 0.767626363 | 0.359177  | 0.030383 |
| cg24877616 | chr13 | South Shore | 0.486344625 | 0.84436941  | 0.3580248 | 6.51E-05 |
| cg08644897 | chr13 | North Shelf | 0.524265904 | 0.881591876 | 0.357326  | 2.56E-05 |
| cg02397552 | chr13 | Open Sea    | 0.503295163 | 0.860503488 | 0.3572083 | 9.63E-06 |
| cg05165750 | chr13 | South Shore | 0.472157419 | 0.827290675 | 0.3551333 | 7.35E-05 |
| cg05832823 | chr13 | Open Sea    | 0.435918702 | 0.788058583 | 0.3521399 | 0.010547 |
| cg19898394 | chr13 | Open Sea    | 0.4168393   | 0.767640674 | 0.3508014 | 5.77E-07 |
| cg04960602 | chr13 | Open Sea    | 0.420370446 | 0.767551891 | 0.3471814 | 0.017823 |
| cg02347881 | chr13 | Open Sea    | 0.465363574 | 0.810965417 | 0.3456018 | 7.22E-07 |
| cg11218434 | chr13 | North Shelf | 0.568241856 | 0.911867258 | 0.3436254 | 3.83E-08 |
| cg10654948 | chr13 | Open Sea    | 0.565151528 | 0.907040841 | 0.3418893 | 5.82E-06 |
| cg03688324 | chr13 | South Shore | 0.408371659 | 0.749404336 | 0.3410327 | 0.048477 |
| cg15718287 | chr13 | North Shelf | 0.466044378 | 0.806528481 | 0.3404841 | 9.47E-05 |
| cg21218957 | chr13 | Open Sea    | 0.564751011 | 0.903266439 | 0.3385154 | 2.87E-05 |
| cg16753167 | chr13 | Open Sea    | 0.533093638 | 0.870324756 | 0.3372311 | 1.94E-08 |
| cg01919701 | chr13 | North Shore | 0.20424906  | 0.540999051 | 0.33675   | 0.000979 |
| cg01649879 | chr13 | Open Sea    | 0.440234987 | 0.771796054 | 0.3315611 | 0.017237 |
| cg23107916 | chr13 | Open Sea    | 0.541470266 | 0.872990915 | 0.3315206 | 1.91E-05 |

|            |       |             |             |             |           |          |
|------------|-------|-------------|-------------|-------------|-----------|----------|
| cg19083474 | chr13 | South Shelf | 0.465876514 | 0.793486715 | 0.3276102 | 7.51E-06 |
| cg08157459 | chr13 | South Shelf | 0.479330473 | 0.806582583 | 0.3272521 | 1.69E-09 |
| cg09842196 | chr13 | South Shore | 0.434169048 | 0.760605389 | 0.3264363 | 1.61E-06 |
| cg25578773 | chr13 | North Shore | 0.489473266 | 0.814760455 | 0.3252872 | 8.26E-05 |
| cg26068160 | chr13 | Island      | 0.58680767  | 0.910752436 | 0.3239448 | 0.001127 |
| cg06807928 | chr13 | North Shore | 0.595829821 | 0.918039556 | 0.3222097 | 1.72E-06 |
| cg02444118 | chr13 | Open Sea    | 0.507153588 | 0.828156129 | 0.3210025 | 7.16E-05 |
| cg11405544 | chr13 | Open Sea    | 0.406168918 | 0.726511115 | 0.3203422 | 0.018093 |
| cg12454229 | chr13 | North Shore | 0.378396913 | 0.696756477 | 0.3183596 | 0.038359 |
| cg17345620 | chr13 | Open Sea    | 0.272416481 | 0.589836535 | 0.3174201 | 0.039912 |
| cg22563937 | chr13 | Open Sea    | 0.440969912 | 0.75791646  | 0.3169465 | 0.001087 |
| cg08626060 | chr13 | South Shelf | 0.49306048  | 0.809568972 | 0.3165085 | 0.001659 |
| cg11118697 | chr13 | Open Sea    | 0.541753513 | 0.856335339 | 0.3145818 | 0.000175 |
| cg01498437 | chr13 | Open Sea    | 0.404213677 | 0.715801477 | 0.3115878 | 0.023958 |
| cg02423185 | chr13 | Open Sea    | 0.434667981 | 0.744974822 | 0.3103068 | 0.001568 |
| cg12008054 | chr13 | Open Sea    | 0.525672271 | 0.834296588 | 0.3086243 | 0.031762 |
| cg05397490 | chr13 | Open Sea    | 0.380018729 | 0.688377699 | 0.308359  | 0.000248 |
| cg23504522 | chr13 | North Shelf | 0.574618845 | 0.882938571 | 0.3083197 | 4.84E-06 |
| cg18485530 | chr13 | Open Sea    | 0.388158845 | 0.69351581  | 0.305357  | 0.000454 |
| cg11281110 | chr13 | Open Sea    | 0.610788064 | 0.915146872 | 0.3043588 | 1.12E-05 |
| cg18446069 | chr13 | South Shore | 0.562537232 | 0.866732467 | 0.3041952 | 1.72E-06 |
| cg01388889 | chr13 | Open Sea    | 0.432487547 | 0.735038364 | 0.3025508 | 0.048101 |
| cg07495027 | chr13 | North Shore | 0.55391884  | 0.856431733 | 0.3025129 | 0.01708  |
| cg15099397 | chr13 | Open Sea    | 0.648846336 | 0.948549757 | 0.2997034 | 1.14E-06 |
| cg00804796 | chr13 | North Shelf | 0.577869574 | 0.877209735 | 0.2993402 | 8.84E-07 |
| cg01811882 | chr13 | Open Sea    | 0.51532855  | 0.812915061 | 0.2975865 | 0.000794 |
| cg18409985 | chr13 | Open Sea    | 0.531052549 | 0.828366223 | 0.2973137 | 2.13E-05 |
| cg23172057 | chr13 | North Shelf | 0.575695091 | 0.871039898 | 0.2953448 | 4.03E-06 |
| cg13816734 | chr13 | Open Sea    | 0.548199743 | 0.840539514 | 0.2923398 | 0.002624 |
| cg24089171 | chr13 | Open Sea    | 0.535569691 | 0.827029647 | 0.29146   | 0.000727 |
| cg06789519 | chr13 | Open Sea    | 0.587875547 | 0.879018352 | 0.2911428 | 0.001469 |
| cg07800658 | chr13 | Open Sea    | 0.374208371 | 0.664604474 | 0.2903961 | 9.15E-09 |
| cg22773522 | chr13 | Open Sea    | 0.514908548 | 0.803511605 | 0.2886031 | 7.36E-06 |
| cg02109189 | chr13 | Island      | 0.604658483 | 0.892058216 | 0.2873997 | 0.000453 |
| cg13726563 | chr13 | Open Sea    | 0.508397257 | 0.7950605   | 0.2866632 | 0.038645 |
| cg07737175 | chr13 | Open Sea    | 0.49208489  | 0.778449924 | 0.286365  | 0.003974 |
| cg18577167 | chr13 | Open Sea    | 0.596572497 | 0.882163467 | 0.285591  | 5.13E-06 |
| cg24148663 | chr13 | North Shelf | 0.612669961 | 0.897798092 | 0.2851281 | 5.16E-06 |
| cg18396626 | chr13 | Open Sea    | 0.581579416 | 0.865346735 | 0.2837673 | 1.81E-05 |
| cg03853945 | chr13 | Open Sea    | 0.250387464 | 0.533825018 | 0.2834376 | 0.013173 |
| cg23522788 | chr13 | North Shelf | 0.64708553  | 0.928381874 | 0.2812963 | 0.000185 |
| cg04325130 | chr13 | Open Sea    | 0.477197874 | 0.757926764 | 0.2807289 | 0.001528 |
| cg26650383 | chr13 | North Shelf | 0.54715865  | 0.826499819 | 0.2793412 | 0.003573 |
| cg18902109 | chr13 | Open Sea    | 0.577521301 | 0.855682494 | 0.2781612 | 8.68E-06 |
| cg17157462 | chr13 | Open Sea    | 0.617739386 | 0.895493316 | 0.2777539 | 4.22E-05 |
| cg11696108 | chr13 | Open Sea    | 0.57931658  | 0.854297517 | 0.2749809 | 0.003676 |
| cg08029014 | chr13 | Open Sea    | 0.62674164  | 0.90008368  | 0.273342  | 8.97E-05 |
| cg22075222 | chr13 | South Shelf | 0.603317389 | 0.876565556 | 0.2732482 | 2.77E-05 |
| cg05623781 | chr13 | Island      | 0.65985252  | 0.933018462 | 0.2731659 | 5.96E-06 |
| cg01561807 | chr13 | Open Sea    | 0.61994355  | 0.890229629 | 0.2702861 | 4.49E-05 |

|            |       |             |             |             |           |          |
|------------|-------|-------------|-------------|-------------|-----------|----------|
| cg12989057 | chr13 | Open Sea    | 0.533383489 | 0.802830336 | 0.2694468 | 2.77E-05 |
| cg18960389 | chr13 | Island      | 0.626103006 | 0.89480093  | 0.2686979 | 0.001993 |
| cg01756536 | chr13 | South Shelf | 0.460551378 | 0.728832508 | 0.2682811 | 5.2E-05  |
| cg20901032 | chr13 | Open Sea    | 0.644126778 | 0.91224471  | 0.2681179 | 0.000279 |
| cg02897974 | chr13 | South Shelf | 0.523976568 | 0.791966929 | 0.2679904 | 0.008641 |
| cg01665118 | chr13 | Open Sea    | 0.58284678  | 0.847979465 | 0.2651327 | 0.000235 |
| cg23326536 | chr13 | North Shore | 0.61793695  | 0.881564328 | 0.2636274 | 0.004964 |
| cg09959790 | chr13 | Open Sea    | 0.610408662 | 0.873212437 | 0.2628038 | 0.000205 |
| cg21605238 | chr13 | South Shelf | 0.532334601 | 0.795032056 | 0.2626975 | 0.000332 |
| cg01406072 | chr13 | South Shore | 0.557536281 | 0.820089908 | 0.2625536 | 0.022165 |
| cg12682367 | chr13 | Open Sea    | 0.434127776 | 0.694121645 | 0.2599939 | 0.001476 |
| cg03608515 | chr13 | Open Sea    | 0.603353242 | 0.863153934 | 0.2598007 | 0.005153 |
| cg26879741 | chr13 | Open Sea    | 0.566776215 | 0.82536844  | 0.2585922 | 0.003436 |
| cg09557341 | chr13 | Open Sea    | 0.591586923 | 0.850049704 | 0.2584628 | 0.023052 |
| cg24965791 | chr13 | North Shore | 0.608667356 | 0.86693106  | 0.2582637 | 0.000325 |
| cg11912948 | chr13 | Open Sea    | 0.60212985  | 0.859331239 | 0.2572014 | 2.94E-06 |
| cg06722606 | chr13 | Open Sea    | 0.486527701 | 0.740096359 | 0.2535687 | 0.009412 |
| cg15828353 | chr13 | Open Sea    | 0.5658817   | 0.81917615  | 0.2532945 | 0.009935 |
| cg15617853 | chr13 | Open Sea    | 0.650404425 | 0.902344168 | 0.2519397 | 0.000158 |
| cg14479139 | chr13 | Open Sea    | 0.561055229 | 0.812647042 | 0.2515918 | 0.000155 |
| cg17576736 | chr13 | Open Sea    | 0.471432137 | 0.722391606 | 0.2509595 | 0.023074 |
| cg18182438 | chr13 | Open Sea    | 0.373802581 | 0.62446465  | 0.2506621 | 0.009544 |
| cg02994463 | chr13 | Open Sea    | 0.556016355 | 0.806586793 | 0.2505704 | 0.001015 |
| cg07260062 | chr13 | North Shelf | 0.616731002 | 0.86725329  | 0.2505223 | 0.004026 |
| cg26127925 | chr13 | North Shelf | 0.585970536 | 0.83610059  | 0.2501301 | 0.039898 |
| cg13048903 | chr13 | South Shelf | 0.400750646 | 0.649776383 | 0.2490257 | 0.007049 |
| cg18475128 | chr13 | South Shelf | 0.670271716 | 0.919155926 | 0.2488842 | 9.43E-06 |
| cg01876492 | chr13 | South Shore | 0.642355038 | 0.890675185 | 0.2483201 | 0.000492 |
| cg22888967 | chr13 | South Shore | 0.387262864 | 0.635403316 | 0.2481405 | 4.56E-06 |
| cg14094164 | chr13 | Open Sea    | 0.597948424 | 0.842102573 | 0.2441541 | 0.039029 |
| cg23648516 | chr13 | Open Sea    | 0.616868848 | 0.860810926 | 0.2439421 | 4.46E-05 |
| cg21367957 | chr13 | South Shelf | 0.628063077 | 0.87143759  | 0.2433745 | 0.000342 |
| cg08453811 | chr13 | Open Sea    | 0.638111369 | 0.881470979 | 0.2433596 | 0.000891 |
| cg18412546 | chr13 | Open Sea    | 0.624049045 | 0.865852575 | 0.2418035 | 0.000322 |
| cg21459486 | chr13 | Open Sea    | 0.577117319 | 0.818460164 | 0.2413428 | 0.005243 |
| cg20857416 | chr13 | North Shelf | 0.571550051 | 0.812882245 | 0.2413322 | 0.000501 |
| cg14855529 | chr13 | Open Sea    | 0.588654562 | 0.829099241 | 0.2404447 | 0.006394 |
| cg19234894 | chr13 | Open Sea    | 0.645381192 | 0.884500241 | 0.239119  | 0.002016 |
| cg06870073 | chr13 | Open Sea    | 0.551168186 | 0.789504881 | 0.2383367 | 0.01943  |
| cg24306422 | chr13 | Open Sea    | 0.631226766 | 0.869399611 | 0.2381728 | 0.00328  |
| cg06565548 | chr13 | Open Sea    | 0.646558556 | 0.884269277 | 0.2377107 | 1.65E-05 |
| cg20430656 | chr13 | Open Sea    | 0.55582992  | 0.793351819 | 0.2375219 | 0.001471 |
| cg21045575 | chr13 | Open Sea    | 0.460168818 | 0.696663575 | 0.2364948 | 0.003652 |
| cg03254538 | chr13 | South Shore | 0.450610485 | 0.686697539 | 0.2360871 | 4.22E-05 |
| cg12159259 | chr13 | Open Sea    | 0.522498769 | 0.758522369 | 0.2360236 | 1.21E-08 |
| cg09955012 | chr13 | Open Sea    | 0.590892104 | 0.826298139 | 0.235406  | 0.000619 |
| cg12593431 | chr13 | South Shore | 0.540272933 | 0.775547703 | 0.2352748 | 0.000652 |
| cg00451105 | chr13 | North Shore | 0.481984766 | 0.716803832 | 0.2348191 | 1.99E-05 |
| cg13776476 | chr13 | South Shelf | 0.688216493 | 0.922959495 | 0.234743  | 0.002528 |
| cg08799967 | chr13 | Open Sea    | 0.627350656 | 0.862079973 | 0.2347293 | 0.000124 |

|            |       |             |             |             |           |          |
|------------|-------|-------------|-------------|-------------|-----------|----------|
| cg01030081 | chr13 | Open Sea    | 0.66029477  | 0.894438384 | 0.2341436 | 0.000136 |
| cg08879684 | chr13 | South Shore | 0.654037716 | 0.887992742 | 0.233955  | 0.001334 |
| cg27285197 | chr13 | Open Sea    | 0.66853123  | 0.902374571 | 0.2338433 | 0.00126  |
| cg26306530 | chr13 | Open Sea    | 0.672306794 | 0.905448089 | 0.2331413 | 0.000147 |
| cg07842635 | chr13 | Open Sea    | 0.498782889 | 0.731189383 | 0.2324065 | 0.00138  |
| cg20537886 | chr13 | Open Sea    | 0.305847008 | 0.536845131 | 0.2309981 | 0.022096 |
| cg27097973 | chr13 | Open Sea    | 0.57004719  | 0.800702955 | 0.2306558 | 0.000105 |
| cg25623522 | chr13 | Open Sea    | 0.622571734 | 0.851642828 | 0.2290711 | 5.85E-05 |
| cg17889439 | chr13 | Open Sea    | 0.619466452 | 0.848525281 | 0.2290588 | 0.000313 |
| cg11644891 | chr13 | Open Sea    | 0.64786464  | 0.876172224 | 0.2283076 | 0.000255 |
| cg23002238 | chr13 | Open Sea    | 0.454965608 | 0.682879589 | 0.227914  | 0.017279 |
| cg13282691 | chr13 | Open Sea    | 0.524708795 | 0.752217216 | 0.2275084 | 0.032871 |
| cg02570298 | chr13 | Open Sea    | 0.593762926 | 0.820845566 | 0.2270826 | 0.000301 |
| cg05265257 | chr13 | Open Sea    | 0.607518781 | 0.834563771 | 0.227045  | 3.05E-05 |
| cg03214977 | chr13 | South Shelf | 0.604389876 | 0.831098517 | 0.2267086 | 0.001804 |
| cg22788065 | chr13 | Open Sea    | 0.480270813 | 0.706411313 | 0.2261405 | 0.004362 |
| cg03830181 | chr13 | Open Sea    | 0.481216843 | 0.706792355 | 0.2255755 | 0.001508 |
| cg07403258 | chr13 | Island      | 0.641307079 | 0.866097803 | 0.2247907 | 0.004188 |
| cg03797537 | chr13 | South Shelf | 0.667238828 | 0.891585907 | 0.2243471 | 0.001028 |
| cg03274669 | chr13 | Open Sea    | 0.67460092  | 0.897943288 | 0.2233424 | 0.001035 |
| cg21418534 | chr13 | Open Sea    | 0.606586212 | 0.829886129 | 0.2232999 | 0.00584  |
| cg03625684 | chr13 | Open Sea    | 0.452993919 | 0.674966322 | 0.2219724 | 0.036154 |
| cg22954906 | chr13 | Open Sea    | 0.67532576  | 0.895603951 | 0.2202782 | 0.002819 |
| cg06038599 | chr13 | North Shelf | 0.67552937  | 0.895639532 | 0.2201102 | 0.001185 |
| cg11345210 | chr13 | Open Sea    | 0.667252199 | 0.887219012 | 0.2199668 | 0.000266 |
| cg07994859 | chr13 | Open Sea    | 0.631154382 | 0.84953062  | 0.2183762 | 0.02891  |
| cg13080336 | chr13 | Open Sea    | 0.567142657 | 0.785385624 | 0.218243  | 0.012549 |
| cg09671187 | chr13 | Open Sea    | 0.604549008 | 0.822760743 | 0.2182117 | 4.4E-05  |
| cg03800844 | chr13 | Open Sea    | 0.612150859 | 0.829494881 | 0.217344  | 0.005336 |
| cg26578408 | chr13 | Open Sea    | 0.508298002 | 0.725139531 | 0.2168415 | 0.017936 |
| cg12242579 | chr13 | Open Sea    | 0.646897405 | 0.863686256 | 0.2167889 | 0.010309 |
| cg06531870 | chr13 | Open Sea    | 0.324868087 | 0.540614746 | 0.2157467 | 0.004175 |
| cg14222574 | chr13 | Open Sea    | 0.390827649 | 0.603720093 | 0.2128924 | 0.030035 |
| cg05014103 | chr13 | Open Sea    | 0.502694924 | 0.715399722 | 0.2127048 | 0.001029 |
| cg25641745 | chr13 | Open Sea    | 0.662427601 | 0.874824383 | 0.2123968 | 0.000105 |
| cg10628699 | chr13 | Open Sea    | 0.699280703 | 0.911548432 | 0.2122677 | 0.000147 |
| cg05447102 | chr13 | Open Sea    | 0.489826224 | 0.702004506 | 0.2121783 | 0.018589 |
| cg23440520 | chr13 | Open Sea    | 0.661684932 | 0.873508798 | 0.2118239 | 0.000896 |
| cg12351768 | chr13 | Open Sea    | 0.650446118 | 0.861987697 | 0.2115416 | 0.010177 |
| cg05430997 | chr13 | Open Sea    | 0.728199742 | 0.939207432 | 0.2110077 | 9.91E-05 |
| cg00513564 | chr13 | Open Sea    | 0.564576189 | 0.775270816 | 0.2106946 | 0.023883 |
| cg19759107 | chr13 | Open Sea    | 0.67581614  | 0.886003468 | 0.2101873 | 0.000976 |
| cg14634515 | chr13 | Open Sea    | 0.628682123 | 0.83871574  | 0.2100336 | 0.000825 |
| cg11025972 | chr13 | North Shore | 0.642167545 | 0.851638845 | 0.2094713 | 0.036312 |
| cg14924131 | chr13 | Open Sea    | 0.647687672 | 0.85664356  | 0.2089559 | 0.002465 |
| cg22709985 | chr13 | North Shore | 0.738742155 | 0.946761231 | 0.2080191 | 7.3E-05  |
| cg22032900 | chr13 | North Shore | 0.622086176 | 0.829773126 | 0.2076869 | 0.003058 |
| cg19674937 | chr13 | Open Sea    | 0.690290376 | 0.896829365 | 0.206539  | 0.001796 |
| cg15627136 | chr13 | South Shore | 0.421789894 | 0.626699792 | 0.2049099 | 0.001945 |
| cg03042692 | chr13 | Open Sea    | 0.615753044 | 0.82052314  | 0.2047701 | 0.001677 |

|            |       |             |             |             |           |          |
|------------|-------|-------------|-------------|-------------|-----------|----------|
| cg27650699 | chr13 | Open Sea    | 0.651595808 | 0.856052021 | 0.2044562 | 0.004574 |
| cg03560416 | chr13 | South Shore | 0.624123017 | 0.827576982 | 0.203454  | 0.014515 |
| cg21121616 | chr13 | South Shore | 0.393569606 | 0.596826164 | 0.2032566 | 0.000115 |
| cg13930220 | chr13 | Open Sea    | 0.718003284 | 0.921150654 | 0.2031474 | 0.000473 |
| cg11116200 | chr13 | Open Sea    | 0.681241086 | 0.883566282 | 0.2023252 | 0.006392 |
| cg18662080 | chr13 | Open Sea    | 0.427824102 | 0.630067161 | 0.2022431 | 0.001661 |
| cg21090182 | chr13 | Open Sea    | 0.615029429 | 0.816881593 | 0.2018522 | 0.000167 |
| cg24586528 | chr13 | Open Sea    | 0.557284431 | 0.758028353 | 0.2007439 | 0.010637 |
| cg01702312 | chr13 | South Shore | 0.702365042 | 0.902972432 | 0.2006074 | 0.000184 |
| cg15471388 | chr14 | Open Sea    | 0.339015116 | 0.793281753 | 0.4542666 | 0.022447 |
| cg01863964 | chr14 | Open Sea    | 0.40584771  | 0.839314973 | 0.4334673 | 0.000873 |
| cg09852209 | chr14 | North Shore | 0.360975819 | 0.769569436 | 0.4085936 | 0.016332 |
| cg18836485 | chr14 | Open Sea    | 0.423553633 | 0.818923927 | 0.3953703 | 0.009685 |
| cg16440331 | chr14 | Open Sea    | 0.49236604  | 0.884793268 | 0.3924272 | 7.47E-08 |
| cg00175487 | chr14 | Open Sea    | 0.481506074 | 0.861750958 | 0.3802449 | 0.000207 |
| cg20600205 | chr14 | Open Sea    | 0.53274901  | 0.911485707 | 0.3787367 | 8.04E-10 |
| cg01270241 | chr14 | Open Sea    | 0.493532549 | 0.870867101 | 0.3773346 | 7.8E-05  |
| cg14910227 | chr14 | Open Sea    | 0.522969068 | 0.896158804 | 0.3731897 | 3.05E-05 |
| cg07431973 | chr14 | Open Sea    | 0.29765311  | 0.669314764 | 0.3716617 | 0.017336 |
| cg23900681 | chr14 | Open Sea    | 0.447324883 | 0.818194619 | 0.3708697 | 8.97E-08 |
| cg14449958 | chr14 | Open Sea    | 0.310561489 | 0.681221689 | 0.3706602 | 0.042746 |
| cg21182196 | chr14 | South Shore | 0.387536781 | 0.756647593 | 0.3691108 | 0.011303 |
| cg13519191 | chr14 | Open Sea    | 0.384600363 | 0.747805684 | 0.3632053 | 0.00525  |
| cg07511317 | chr14 | Open Sea    | 0.570310705 | 0.920744225 | 0.3504335 | 1.39E-06 |
| cg18961788 | chr14 | Open Sea    | 0.459881184 | 0.809706141 | 0.349825  | 0.001128 |
| cg21230021 | chr14 | North Shore | 0.535234564 | 0.882870487 | 0.3476359 | 1.17E-06 |
| cg00831276 | chr14 | North Shore | 0.352291748 | 0.69642058  | 0.3441288 | 0.027882 |
| cg13995230 | chr14 | Open Sea    | 0.388807747 | 0.73093895  | 0.3421312 | 0.000142 |
| cg10734581 | chr14 | Open Sea    | 0.354097232 | 0.695518752 | 0.3414215 | 0.011381 |
| cg16324314 | chr14 | Open Sea    | 0.548292694 | 0.887671624 | 0.3393789 | 0.000183 |
| cg11035122 | chr14 | Open Sea    | 0.523527123 | 0.859451213 | 0.3359241 | 0.001119 |
| cg00941900 | chr14 | Open Sea    | 0.540363598 | 0.874453633 | 0.33409   | 0.000415 |
| cg23029159 | chr14 | Open Sea    | 0.553803947 | 0.880246874 | 0.3264429 | 0.000153 |
| cg14131376 | chr14 | Open Sea    | 0.5716772   | 0.89795012  | 0.3262729 | 0.001759 |
| cg14171418 | chr14 | Open Sea    | 0.557718855 | 0.880731103 | 0.3230122 | 0.007071 |
| cg23811289 | chr14 | Open Sea    | 0.426062517 | 0.748473918 | 0.3224114 | 0.001835 |
| cg16590691 | chr14 | South Shore | 0.618203825 | 0.937336585 | 0.3191328 | 6.83E-06 |
| cg19714865 | chr14 | North Shelf | 0.629677262 | 0.945740049 | 0.3160628 | 8.97E-08 |
| cg04260307 | chr14 | Open Sea    | 0.582081581 | 0.897956846 | 0.3158753 | 3.69E-06 |
| cg12205669 | chr14 | Open Sea    | 0.599318421 | 0.914199837 | 0.3148814 | 2.74E-06 |
| cg15874390 | chr14 | Open Sea    | 0.424104018 | 0.737247551 | 0.3131435 | 0.027483 |
| cg10237148 | chr14 | South Shelf | 0.555413506 | 0.865799071 | 0.3103856 | 1.81E-05 |
| cg11777870 | chr14 | Open Sea    | 0.583472236 | 0.89288815  | 0.3094159 | 2.21E-05 |
| cg13965707 | chr14 | Open Sea    | 0.605789505 | 0.914309263 | 0.3085198 | 3.92E-05 |
| cg16725974 | chr14 | Open Sea    | 0.612129622 | 0.919880331 | 0.3077507 | 3.5E-07  |
| cg01802121 | chr14 | Open Sea    | 0.455693045 | 0.761287263 | 0.3055942 | 0.004829 |
| cg04784410 | chr14 | Open Sea    | 0.229068021 | 0.534313351 | 0.3052453 | 0.00265  |
| cg03401464 | chr14 | Open Sea    | 0.392568298 | 0.695627529 | 0.3030592 | 0.00265  |
| cg04738877 | chr14 | South Shore | 0.621848403 | 0.924075278 | 0.3022269 | 1.23E-06 |
| cg05351785 | chr14 | Open Sea    | 0.470969238 | 0.769981088 | 0.2990118 | 0.017596 |

|            |       |             |             |             |           |          |
|------------|-------|-------------|-------------|-------------|-----------|----------|
| cg26405841 | chr14 | Open Sea    | 0.625745169 | 0.922664683 | 0.2969195 | 2.21E-06 |
| cg18455364 | chr14 | North Shelf | 0.601305066 | 0.897538449 | 0.2962334 | 2.74E-06 |
| cg14334338 | chr14 | Open Sea    | 0.603079151 | 0.897326421 | 0.2942473 | 7.8E-06  |
| cg10472263 | chr14 | Open Sea    | 0.570623931 | 0.864312933 | 0.293689  | 6.36E-05 |
| cg18450130 | chr14 | Open Sea    | 0.616077996 | 0.908505131 | 0.2924271 | 1E-05    |
| cg09279803 | chr14 | Open Sea    | 0.658235741 | 0.949943322 | 0.2917076 | 9.29E-07 |
| cg01862897 | chr14 | Open Sea    | 0.440473117 | 0.731703435 | 0.2912303 | 0.00148  |
| cg03561338 | chr14 | Open Sea    | 0.558097479 | 0.84877943  | 0.290682  | 4.27E-06 |
| cg11737413 | chr14 | South Shore | 0.609353104 | 0.8967566   | 0.2874035 | 0.00064  |
| cg22884674 | chr14 | Open Sea    | 0.613633742 | 0.899278964 | 0.2856452 | 1.02E-06 |
| cg05218696 | chr14 | Open Sea    | 0.5906338   | 0.872249357 | 0.2816156 | 0.022195 |
| cg16693870 | chr14 | Open Sea    | 0.665620163 | 0.946154019 | 0.2805339 | 2.28E-05 |
| cg11177858 | chr14 | South Shelf | 0.600552208 | 0.880835074 | 0.2802829 | 8.81E-07 |
| cg03019112 | chr14 | Open Sea    | 0.557638132 | 0.837667735 | 0.2800296 | 0.000197 |
| cg26238975 | chr14 | Open Sea    | 0.559608152 | 0.835989826 | 0.2763817 | 0.000132 |
| cg02148547 | chr14 | North Shore | 0.595536046 | 0.871845695 | 0.2763096 | 0.001396 |
| cg01200264 | chr14 | Open Sea    | 0.607442702 | 0.882820845 | 0.2753781 | 0.001597 |
| cg24965187 | chr14 | Open Sea    | 0.609963779 | 0.884136306 | 0.2741725 | 8.41E-06 |
| cg04724807 | chr14 | Open Sea    | 0.58908884  | 0.862155128 | 0.2730663 | 1.92E-05 |
| cg11763914 | chr14 | Open Sea    | 0.578244429 | 0.850904116 | 0.2726597 | 0.007866 |
| cg18261657 | chr14 | Island      | 0.648299587 | 0.918875917 | 0.2705763 | 0.002256 |
| cg14166701 | chr14 | Open Sea    | 0.417188774 | 0.686515977 | 0.2693272 | 0.003871 |
| cg04191306 | chr14 | Open Sea    | 0.631531198 | 0.897334105 | 0.2658029 | 2.48E-05 |
| cg01163366 | chr14 | Open Sea    | 0.607995032 | 0.873472562 | 0.2654775 | 0.005147 |
| cg15444358 | chr14 | South Shore | 0.319862321 | 0.585327515 | 0.2654652 | 0.0002   |
| cg00166915 | chr14 | Open Sea    | 0.632584561 | 0.896007819 | 0.2634233 | 0.000921 |
| cg16336989 | chr14 | Open Sea    | 0.614472076 | 0.876146059 | 0.261674  | 4.14E-05 |
| cg13250679 | chr14 | South Shore | 0.588961603 | 0.84987153  | 0.2609099 | 0.008158 |
| cg10426658 | chr14 | Open Sea    | 0.584722831 | 0.84235264  | 0.2576298 | 1.74E-05 |
| cg05958352 | chr14 | Open Sea    | 0.669659373 | 0.926913942 | 0.2572546 | 1.76E-05 |
| cg13097800 | chr14 | Open Sea    | 0.349104533 | 0.605616479 | 0.2565119 | 0.041391 |
| cg03050096 | chr14 | North Shore | 0.581608623 | 0.837939967 | 0.2563313 | 0.000395 |
| cg03562978 | chr14 | Open Sea    | 0.482667063 | 0.738991239 | 0.2563242 | 0.015951 |
| cg05859308 | chr14 | Open Sea    | 0.603774284 | 0.858746373 | 0.2549721 | 0.022165 |
| cg19827511 | chr14 | North Shore | 0.639571457 | 0.894277798 | 0.2547063 | 0.004615 |
| cg01860774 | chr14 | North Shore | 0.547988156 | 0.80261774  | 0.2546296 | 0.007087 |
| cg03496520 | chr14 | Open Sea    | 0.551730938 | 0.806328905 | 0.254598  | 0.031901 |
| cg19603100 | chr14 | Open Sea    | 0.64430109  | 0.898264267 | 0.2539632 | 1.27E-05 |
| cg05348084 | chr14 | Open Sea    | 0.575090259 | 0.829047021 | 0.2539568 | 0.001451 |
| cg20067612 | chr14 | Open Sea    | 0.652892519 | 0.905620642 | 0.2527281 | 4.39E-06 |
| cg18440069 | chr14 | Open Sea    | 0.647155036 | 0.898965451 | 0.2518104 | 8.26E-05 |
| cg24082368 | chr14 | Open Sea    | 0.508056595 | 0.758532015 | 0.2504754 | 0.000193 |
| cg27074221 | chr14 | Open Sea    | 0.584334563 | 0.834434832 | 0.2501003 | 0.027973 |
| cg18893311 | chr14 | Island      | 0.658485508 | 0.908577895 | 0.2500924 | 0.030399 |
| cg27117476 | chr14 | North Shore | 0.485550287 | 0.734890416 | 0.2493401 | 0.000532 |
| cg07122123 | chr14 | Open Sea    | 0.40322501  | 0.648046213 | 0.2448212 | 0.018379 |
| cg20285470 | chr14 | North Shelf | 0.637512119 | 0.882325365 | 0.2448132 | 0.030449 |
| cg05339415 | chr14 | South Shore | 0.266623031 | 0.510316472 | 0.2436934 | 2.93E-05 |
| cg16421467 | chr14 | Open Sea    | 0.606309676 | 0.849409687 | 0.2431    | 0.000264 |
| cg10845380 | chr14 | North Shore | 0.685892851 | 0.928909927 | 0.2430171 | 8.28E-05 |

|            |       |             |             |             |           |          |
|------------|-------|-------------|-------------|-------------|-----------|----------|
| cg08188555 | chr14 | North Shore | 0.614310667 | 0.857121187 | 0.2428105 | 9.28E-07 |
| cg13718960 | chr14 | Open Sea    | 0.652060116 | 0.894620146 | 0.24256   | 3.77E-05 |
| cg20902104 | chr14 | Open Sea    | 0.601351705 | 0.843896784 | 0.2425451 | 2.64E-05 |
| cg12831208 | chr14 | Open Sea    | 0.658722854 | 0.900661265 | 0.2419384 | 0.000617 |
| cg06366345 | chr14 | Open Sea    | 0.659054104 | 0.900960321 | 0.2419062 | 3.28E-05 |
| cg23965459 | chr14 | South Shore | 0.659137536 | 0.900613422 | 0.2414759 | 3.94E-05 |
| cg13608458 | chr14 | Open Sea    | 0.648791794 | 0.889951916 | 0.2411601 | 9.99E-05 |
| cg10004481 | chr14 | Open Sea    | 0.645321627 | 0.886066837 | 0.2407452 | 5.79E-05 |
| cg05153345 | chr14 | Open Sea    | 0.672360516 | 0.912316622 | 0.2399561 | 0.000617 |
| cg15880113 | chr14 | Open Sea    | 0.628165423 | 0.867327541 | 0.2391621 | 5.35E-05 |
| cg16372520 | chr14 | Open Sea    | 0.170835029 | 0.409991067 | 0.239156  | 0.010746 |
| cg18114811 | chr14 | Open Sea    | 0.595710664 | 0.834804018 | 0.2390934 | 0.000465 |
| cg26270038 | chr14 | Open Sea    | 0.556764691 | 0.793561102 | 0.2367964 | 0.00642  |
| cg18587499 | chr14 | Open Sea    | 0.379996729 | 0.615825348 | 0.2358286 | 0.005854 |
| cg11090582 | chr14 | South Shore | 0.540250515 | 0.77549053  | 0.23524   | 0.020403 |
| cg10137253 | chr14 | Open Sea    | 0.610174654 | 0.845296827 | 0.2351222 | 0.042537 |
| cg16341690 | chr14 | Island      | 0.712717891 | 0.946983763 | 0.2342659 | 0.000133 |
| cg04461867 | chr14 | Open Sea    | 0.538793972 | 0.772428987 | 0.233635  | 0.003451 |
| cg23139887 | chr14 | Open Sea    | 0.661165148 | 0.894076281 | 0.2329111 | 0.000123 |
| cg01545079 | chr14 | Open Sea    | 0.604928342 | 0.837563233 | 0.2326349 | 0.000377 |
| cg08112616 | chr14 | Open Sea    | 0.662358486 | 0.894554329 | 0.2321958 | 0.000256 |
| cg18384960 | chr14 | Open Sea    | 0.666186634 | 0.897798772 | 0.2316121 | 0.000417 |
| cg01702210 | chr14 | Open Sea    | 0.462400694 | 0.693634995 | 0.2312343 | 0.003345 |
| cg19640754 | chr14 | Open Sea    | 0.590943836 | 0.821880477 | 0.2309366 | 0.004663 |
| cg25045972 | chr14 | Open Sea    | 0.614390821 | 0.844997132 | 0.2306063 | 0.001275 |
| cg19872681 | chr14 | Open Sea    | 0.528889484 | 0.758683397 | 0.2297939 | 0.005237 |
| cg19650253 | chr14 | South Shore | 0.527888404 | 0.757368292 | 0.2294799 | 0.021464 |
| cg22897193 | chr14 | South Shore | 0.599291809 | 0.828301603 | 0.2290098 | 7.25E-06 |
| cg22971720 | chr14 | South Shelf | 0.650077601 | 0.87838392  | 0.2283063 | 0.027857 |
| cg13639866 | chr14 | Open Sea    | 0.689863733 | 0.91776572  | 0.227902  | 0.000427 |
| cg26267081 | chr14 | Open Sea    | 0.55684835  | 0.784302373 | 0.227454  | 0.000404 |
| cg12820006 | chr14 | Open Sea    | 0.716914534 | 0.944071288 | 0.2271568 | 0.001009 |
| cg27172568 | chr14 | North Shore | 0.522102928 | 0.74863286  | 0.2265299 | 5.17E-05 |
| cg03918703 | chr14 | North Shore | 0.462978299 | 0.689143109 | 0.2261648 | 0.003633 |
| cg09357761 | chr14 | Open Sea    | 0.676634127 | 0.901925255 | 0.2252911 | 0.000151 |
| cg04518304 | chr14 | Island      | 0.638281049 | 0.86245709  | 0.224176  | 0.003259 |
| cg01459854 | chr14 | North Shore | 0.606984545 | 0.83014674  | 0.2231622 | 0.007756 |
| cg18642567 | chr14 | Open Sea    | 0.588246807 | 0.81078526  | 0.2225385 | 6.52E-06 |
| cg26960833 | chr14 | Open Sea    | 0.497104212 | 0.719615489 | 0.2225113 | 6.8E-05  |
| cg16792183 | chr14 | Open Sea    | 0.674320587 | 0.896145008 | 0.2218244 | 0.000836 |
| cg21075986 | chr14 | North Shelf | 0.672124175 | 0.893913398 | 0.2217892 | 0.000325 |
| cg20070138 | chr14 | South Shore | 0.718022154 | 0.939792983 | 0.2217708 | 0.000249 |
| cg21513316 | chr14 | Island      | 0.650670652 | 0.871958142 | 0.2212875 | 0.000134 |
| cg01649853 | chr14 | South Shelf | 0.63674078  | 0.856802513 | 0.2200617 | 0.008641 |
| cg23714481 | chr14 | Open Sea    | 0.434780414 | 0.654683986 | 0.2199036 | 0.000256 |
| cg02975060 | chr14 | Open Sea    | 0.691331307 | 0.910559532 | 0.2192282 | 0.007594 |
| cg10907582 | chr14 | Open Sea    | 0.573334826 | 0.792518609 | 0.2191838 | 0.043728 |
| cg10931901 | chr14 | Open Sea    | 0.599866801 | 0.818642492 | 0.2187757 | 0.03634  |
| cg07929646 | chr14 | Island      | 0.641821121 | 0.860365304 | 0.2185442 | 0.002015 |
| cg18367124 | chr14 | Open Sea    | 0.516987766 | 0.73493464  | 0.2179469 | 0.000573 |

|            |       |             |             |             |           |          |
|------------|-------|-------------|-------------|-------------|-----------|----------|
| cg20021570 | chr14 | North Shore | 0.659068842 | 0.876833329 | 0.2177645 | 1.93E-05 |
| cg01013868 | chr14 | Open Sea    | 0.630154025 | 0.847538496 | 0.2173845 | 0.009767 |
| cg26431018 | chr14 | South Shore | 0.557149668 | 0.773763963 | 0.2166143 | 0.002216 |
| cg04732303 | chr14 | Open Sea    | 0.628599938 | 0.844513715 | 0.2159138 | 0.000123 |
| cg27292977 | chr14 | South Shelf | 0.601159127 | 0.816916033 | 0.2157569 | 0.002234 |
| cg14001486 | chr14 | Open Sea    | 0.665717953 | 0.881325497 | 0.2156075 | 0.021044 |
| cg07502309 | chr14 | Open Sea    | 0.620958523 | 0.835930643 | 0.2149721 | 0.007524 |
| cg08240074 | chr14 | Open Sea    | 0.695920657 | 0.910618041 | 0.2146974 | 0.000758 |
| cg08050663 | chr14 | Open Sea    | 0.518453375 | 0.732465802 | 0.2140124 | 0.00012  |
| cg15875340 | chr14 | North Shelf | 0.636128464 | 0.850091965 | 0.2139635 | 6.73E-05 |
| cg14187585 | chr14 | Open Sea    | 0.629273516 | 0.843190123 | 0.2139166 | 0.001211 |
| cg07572927 | chr14 | South Shelf | 0.68481396  | 0.89685269  | 0.2120387 | 0.030834 |
| cg11191390 | chr14 | Open Sea    | 0.541849508 | 0.75372119  | 0.2118717 | 0.045221 |
| cg27504299 | chr14 | Open Sea    | 0.680734249 | 0.892186035 | 0.2114518 | 0.001462 |
| cg02028524 | chr14 | South Shore | 0.545759627 | 0.756368226 | 0.2106086 | 0.034977 |
| cg18815018 | chr14 | Open Sea    | 0.67461417  | 0.884757873 | 0.2101437 | 0.000279 |
| cg21853587 | chr14 | Open Sea    | 0.588490953 | 0.798412118 | 0.2099212 | 0.001418 |
| cg15830544 | chr14 | South Shore | 0.440185902 | 0.649867825 | 0.2096819 | 0.001472 |
| cg09293488 | chr14 | Open Sea    | 0.706321567 | 0.91589054  | 0.209569  | 0.000185 |
| cg08209104 | chr14 | Open Sea    | 0.512451697 | 0.72176566  | 0.209314  | 0.021558 |
| cg01736164 | chr14 | Open Sea    | 0.552785137 | 0.761317925 | 0.2085328 | 0.035993 |
| cg01715680 | chr14 | Open Sea    | 0.617865154 | 0.826186263 | 0.2083211 | 0.006932 |
| cg09940861 | chr14 | Island      | 0.532733033 | 0.7408138   | 0.2080808 | 0.042935 |
| cg18603483 | chr14 | Open Sea    | 0.642626591 | 0.850202854 | 0.2075763 | 0.005309 |
| cg23368458 | chr14 | South Shelf | 0.670667983 | 0.877978243 | 0.2073103 | 0.001794 |
| cg26146988 | chr14 | South Shelf | 0.693891504 | 0.900870413 | 0.2069789 | 0.000462 |
| cg20981184 | chr14 | North Shelf | 0.483113972 | 0.690065002 | 0.206951  | 0.000592 |
| cg09271279 | chr14 | Open Sea    | 0.35433384  | 0.560833019 | 0.2064992 | 9.66E-05 |
| cg03290602 | chr14 | Open Sea    | 0.694141119 | 0.900206834 | 0.2060657 | 0.000738 |
| cg14030940 | chr14 | North Shelf | 0.727801518 | 0.933532665 | 0.2057311 | 0.001138 |
| cg13766642 | chr14 | South Shore | 0.70893416  | 0.913727946 | 0.2047938 | 0.000261 |
| cg11820913 | chr14 | Open Sea    | 0.663649796 | 0.868178255 | 0.2045285 | 0.037441 |
| cg16410171 | chr14 | Open Sea    | 0.445226969 | 0.649147667 | 0.2039207 | 0.000873 |
| cg22969666 | chr14 | South Shelf | 0.609511169 | 0.813102911 | 0.2035917 | 0.006118 |
| cg18185987 | chr14 | Open Sea    | 0.646779204 | 0.849037333 | 0.2022581 | 0.003697 |
| cg21178618 | chr14 | Open Sea    | 0.68264046  | 0.884282217 | 0.2016418 | 0.001675 |
| cg00395657 | chr14 | Open Sea    | 0.630172103 | 0.831718865 | 0.2015468 | 0.042222 |
| cg07258507 | chr14 | Open Sea    | 0.430513621 | 0.631825461 | 0.2013118 | 0.000303 |
| cg20250250 | chr14 | Open Sea    | 0.638229241 | 0.839090608 | 0.2008614 | 4.78E-05 |
| cg11792470 | chr14 | Island      | 0.728920887 | 0.928937859 | 0.200017  | 0.005751 |
| cg19375854 | chr15 | Open Sea    | 0.4233131   | 0.889066032 | 0.4657529 | 0.000571 |
| cg09657114 | chr15 | Open Sea    | 0.43185989  | 0.893336881 | 0.461477  | 1.66E-07 |
| cg05169988 | chr15 | Open Sea    | 0.373977553 | 0.816034685 | 0.4420571 | 0.036569 |
| cg08633249 | chr15 | Open Sea    | 0.37652055  | 0.788656572 | 0.412136  | 1.25E-05 |
| cg10451116 | chr15 | Open Sea    | 0.487323983 | 0.89658818  | 0.4092642 | 0.000419 |
| cg13151645 | chr15 | South Shelf | 0.516709961 | 0.912874419 | 0.3961645 | 6.07E-10 |
| cg05415308 | chr15 | North Shore | 0.334308359 | 0.730443206 | 0.3961348 | 0.024195 |
| cg24135293 | chr15 | Open Sea    | 0.548714525 | 0.934183673 | 0.3854691 | 7.96E-09 |
| cg06232205 | chr15 | Open Sea    | 0.259715086 | 0.644238433 | 0.3845233 | 0.000453 |
| cg11829253 | chr15 | South Shore | 0.502562186 | 0.885969038 | 0.3834069 | 2.21E-08 |



|            |       |             |             |             |           |          |
|------------|-------|-------------|-------------|-------------|-----------|----------|
| cg01626493 | chr15 | Open Sea    | 0.476158393 | 0.857006833 | 0.3808484 | 3.84E-08 |
| cg03441710 | chr15 | Open Sea    | 0.453774143 | 0.832232675 | 0.3784585 | 7.11E-05 |
| cg12655112 | chr15 | North Shelf | 0.413982965 | 0.778648336 | 0.3646654 | 0.047098 |
| cg12030298 | chr15 | Open Sea    | 0.365309328 | 0.727600186 | 0.3622909 | 0.001317 |
| cg01771462 | chr15 | Open Sea    | 0.556185894 | 0.915217391 | 0.3590315 | 2.29E-05 |
| cg12736760 | chr15 | Open Sea    | 0.570314381 | 0.921242426 | 0.350928  | 4.85E-08 |
| cg09651136 | chr15 | South Shore | 0.435973346 | 0.786811837 | 0.3508385 | 0.0141   |
| cg24495350 | chr15 | Open Sea    | 0.473808749 | 0.812503838 | 0.3386951 | 0.001499 |
| cg06719949 | chr15 | Open Sea    | 0.47253337  | 0.808573168 | 0.3360398 | 3.24E-06 |
| cg12217971 | chr15 | Open Sea    | 0.338051394 | 0.671183614 | 0.3331322 | 0.041542 |
| cg13858909 | chr15 | Open Sea    | 0.562708029 | 0.894164734 | 0.3314567 | 6.56E-06 |
| cg19606131 | chr15 | Open Sea    | 0.448615978 | 0.779366232 | 0.3307503 | 0.00067  |
| cg06729034 | chr15 | Open Sea    | 0.571631894 | 0.900481299 | 0.3288494 | 2.99E-06 |
| cg13614617 | chr15 | South Shelf | 0.507001093 | 0.834306442 | 0.3273053 | 0.00145  |
| cg26572608 | chr15 | North Shore | 0.487663231 | 0.812405632 | 0.3247424 | 0.003813 |
| cg21767702 | chr15 | Open Sea    | 0.414888804 | 0.737699786 | 0.322811  | 5.9E-08  |
| cg13488011 | chr15 | Open Sea    | 0.523976023 | 0.84668368  | 0.3227077 | 0.008702 |
| cg10545250 | chr15 | North Shore | 0.613801397 | 0.936329499 | 0.3225281 | 5.15E-07 |
| cg26317318 | chr15 | South Shelf | 0.497864068 | 0.814297343 | 0.3164333 | 0.00012  |
| cg09353563 | chr15 | Open Sea    | 0.586250225 | 0.901453898 | 0.3152037 | 3.48E-05 |
| cg08642292 | chr15 | Open Sea    | 0.478997963 | 0.793052811 | 0.3140548 | 3.48E-05 |
| cg24361079 | chr15 | Open Sea    | 0.544870172 | 0.857248577 | 0.3123784 | 0.008905 |
| cg01735277 | chr15 | South Shelf | 0.588589158 | 0.898458022 | 0.3098689 | 0.000379 |
| cg13343392 | chr15 | Open Sea    | 0.505980078 | 0.815349192 | 0.3093691 | 0.01516  |
| cg23518037 | chr15 | Open Sea    | 0.357528056 | 0.665227999 | 0.3076999 | 2.37E-05 |
| cg13944105 | chr15 | Open Sea    | 0.534433962 | 0.840733598 | 0.3062996 | 0.004332 |
| cg27358936 | chr15 | Open Sea    | 0.381615965 | 0.686419411 | 0.3048034 | 0.011209 |
| cg04096150 | chr15 | Open Sea    | 0.56701607  | 0.86983055  | 0.3028145 | 3.59E-05 |
| cg02750133 | chr15 | Open Sea    | 0.564854204 | 0.867556021 | 0.3027018 | 3.62E-06 |
| cg08121164 | chr15 | North Shore | 0.482896687 | 0.784864511 | 0.3019678 | 0.036069 |
| cg12056138 | chr15 | Island      | 0.59829448  | 0.894462835 | 0.2961684 | 6.84E-06 |
| cg13571319 | chr15 | Open Sea    | 0.605162795 | 0.900499273 | 0.2953365 | 5.78E-05 |
| cg02272429 | chr15 | Open Sea    | 0.580147442 | 0.874195329 | 0.2940479 | 2.46E-05 |
| cg09500738 | chr15 | Open Sea    | 0.523143313 | 0.815832614 | 0.2926893 | 0.020455 |
| cg03036214 | chr15 | Open Sea    | 0.329947303 | 0.620035831 | 0.2900885 | 0.040036 |
| cg16800228 | chr15 | Open Sea    | 0.616232012 | 0.904534676 | 0.2883027 | 8.2E-08  |
| cg18464991 | chr15 | Open Sea    | 0.305316807 | 0.593356114 | 0.2880393 | 0.027723 |
| cg24700823 | chr15 | Open Sea    | 0.629566098 | 0.915516708 | 0.2859506 | 0.000737 |
| cg02287685 | chr15 | Open Sea    | 0.635809655 | 0.92158803  | 0.2857784 | 0.000512 |
| cg10479097 | chr15 | North Shelf | 0.62789337  | 0.913579326 | 0.285686  | 4.44E-06 |
| cg05971934 | chr15 | Open Sea    | 0.502379363 | 0.786981512 | 0.2846021 | 0.011754 |
| cg17171920 | chr15 | Open Sea    | 0.652042144 | 0.93613157  | 0.2840894 | 6.23E-05 |
| cg16966261 | chr15 | Open Sea    | 0.604083559 | 0.885780925 | 0.2816974 | 0.002869 |
| cg02585142 | chr15 | North Shelf | 0.625384439 | 0.906195152 | 0.2808107 | 1.42E-06 |
| cg13038025 | chr15 | Open Sea    | 0.481532278 | 0.762023004 | 0.2804907 | 0.039962 |
| cg05852824 | chr15 | Open Sea    | 0.439165578 | 0.719499265 | 0.2803337 | 0.014273 |
| cg22776451 | chr15 | Open Sea    | 0.479020257 | 0.758968487 | 0.2799482 | 0.003403 |
| cg18581777 | chr15 | Open Sea    | 0.594099922 | 0.873491213 | 0.2793913 | 0.000112 |
| cg13615100 | chr15 | Open Sea    | 0.533052959 | 0.811964761 | 0.2789118 | 0.004049 |
| cg22291711 | chr15 | Open Sea    | 0.524704501 | 0.801309255 | 0.2766048 | 0.000179 |

|            |       |             |             |             |           |          |
|------------|-------|-------------|-------------|-------------|-----------|----------|
| cg12648213 | chr15 | Open Sea    | 0.639797626 | 0.914540021 | 0.2747424 | 0.000128 |
| cg23902454 | chr15 | Open Sea    | 0.631463439 | 0.905010606 | 0.2735472 | 2.74E-06 |
| cg21221455 | chr15 | South Shore | 0.589984634 | 0.863230299 | 0.2732457 | 0.020478 |
| cg27084736 | chr15 | Open Sea    | 0.594615148 | 0.867639906 | 0.2730248 | 0.000524 |
| cg25605243 | chr15 | Open Sea    | 0.534865471 | 0.807052576 | 0.2721871 | 0.00559  |
| cg25863735 | chr15 | Open Sea    | 0.520960103 | 0.792672175 | 0.2717121 | 7.49E-05 |
| cg01041256 | chr15 | North Shelf | 0.618062851 | 0.889748311 | 0.2716855 | 1.39E-05 |
| cg12732548 | chr15 | Open Sea    | 0.567032647 | 0.836605114 | 0.2695725 | 0.000415 |
| cg19686152 | chr15 | North Shore | 0.341216547 | 0.610252145 | 0.2690356 | 6.49E-07 |
| cg16720005 | chr15 | North Shore | 0.509402317 | 0.773294486 | 0.2638922 | 0.001491 |
| cg24447890 | chr15 | Open Sea    | 0.460619785 | 0.719928231 | 0.2593084 | 4.46E-06 |
| cg07148167 | chr15 | North Shelf | 0.629474527 | 0.887611404 | 0.2581369 | 0.00021  |
| cg01878366 | chr15 | Open Sea    | 0.482509141 | 0.740275365 | 0.2577662 | 0.035085 |
| cg05387565 | chr15 | Open Sea    | 0.456446114 | 0.712252262 | 0.2558061 | 1.25E-05 |
| cg16920418 | chr15 | Open Sea    | 0.583312594 | 0.839036159 | 0.2557236 | 1.24E-05 |
| cg23154781 | chr15 | Open Sea    | 0.588227393 | 0.843320658 | 0.2550933 | 0.002439 |
| cg03351248 | chr15 | North Shore | 0.641012595 | 0.895789393 | 0.2547768 | 0.00069  |
| cg09086964 | chr15 | Open Sea    | 0.602302802 | 0.857030139 | 0.2547273 | 0.000397 |
| cg13182816 | chr15 | Open Sea    | 0.57012262  | 0.82483224  | 0.2547096 | 0.009493 |
| cg11412248 | chr15 | North Shelf | 0.324093052 | 0.577815111 | 0.2537221 | 0.00233  |
| cg02539274 | chr15 | Open Sea    | 0.617621405 | 0.869288528 | 0.2516671 | 4.28E-07 |
| cg10438282 | chr15 | Open Sea    | 0.424677376 | 0.676050966 | 0.2513736 | 0.010891 |
| cg21578351 | chr15 | Open Sea    | 0.503683362 | 0.754552018 | 0.2508687 | 0.01112  |
| cg05169756 | chr15 | Open Sea    | 0.661299568 | 0.911971299 | 0.2506717 | 0.000935 |
| cg26841157 | chr15 | Open Sea    | 0.611815607 | 0.861945064 | 0.2501295 | 0.043387 |
| cg26837766 | chr15 | Open Sea    | 0.61652048  | 0.866594755 | 0.2500743 | 0.005655 |
| cg18926420 | chr15 | Open Sea    | 0.50174352  | 0.751045703 | 0.2493022 | 0.029523 |
| cg00214012 | chr15 | Open Sea    | 0.558825026 | 0.808033488 | 0.2492085 | 0.032418 |
| cg12450872 | chr15 | Open Sea    | 0.651224098 | 0.900365301 | 0.2491412 | 0.000264 |
| cg19996221 | chr15 | Open Sea    | 0.692418159 | 0.940609324 | 0.2481912 | 2.43E-05 |
| cg07728579 | chr15 | North Shelf | 0.542592014 | 0.789958453 | 0.2473664 | 0.001983 |
| cg23709231 | chr15 | Open Sea    | 0.538499961 | 0.782859838 | 0.2443599 | 0.010826 |
| cg08942191 | chr15 | Open Sea    | 0.627830605 | 0.871832157 | 0.2440016 | 0.000772 |
| cg23413527 | chr15 | Open Sea    | 0.608432281 | 0.852066806 | 0.2436345 | 0.009139 |
| cg07488506 | chr15 | North Shore | 0.571149177 | 0.814594779 | 0.2434456 | 0.00299  |
| cg26317549 | chr15 | Open Sea    | 0.541654192 | 0.782655283 | 0.2410011 | 0.019148 |
| cg05357347 | chr15 | Open Sea    | 0.663792077 | 0.902408102 | 0.238616  | 0.001488 |
| cg27087809 | chr15 | Open Sea    | 0.616785225 | 0.855365294 | 0.2385801 | 0.002242 |
| cg25842107 | chr15 | Open Sea    | 0.538129354 | 0.776143296 | 0.2380139 | 0.000148 |
| cg19816354 | chr15 | Open Sea    | 0.297022725 | 0.53334023  | 0.2363175 | 0.000552 |
| cg17821664 | chr15 | Open Sea    | 0.614513299 | 0.850750655 | 0.2362374 | 0.00178  |
| cg05421464 | chr15 | Open Sea    | 0.278801758 | 0.515024466 | 0.2362227 | 5.95E-06 |
| cg05501498 | chr15 | Open Sea    | 0.575698066 | 0.811480712 | 0.2357826 | 0.000376 |
| cg04139895 | chr15 | Open Sea    | 0.634985726 | 0.870361143 | 0.2353754 | 0.00228  |
| cg12437628 | chr15 | Open Sea    | 0.650109299 | 0.884928811 | 0.2348195 | 0.000361 |
| cg27496506 | chr15 | Open Sea    | 0.652029209 | 0.886495996 | 0.2344668 | 0.000684 |
| cg09459714 | chr15 | Open Sea    | 0.636091938 | 0.870105416 | 0.2340135 | 0.000383 |
| cg19847244 | chr15 | Open Sea    | 0.650577578 | 0.884417858 | 0.2338403 | 9.04E-05 |
| cg06524553 | chr15 | Open Sea    | 0.637468362 | 0.87076632  | 0.233298  | 0.000244 |
| cg19010490 | chr15 | South Shore | 0.577139895 | 0.808978834 | 0.2318389 | 0.030387 |

|            |       |             |             |             |           |          |
|------------|-------|-------------|-------------|-------------|-----------|----------|
| cg11540815 | chr15 | Open Sea    | 0.630922184 | 0.861014747 | 0.2300926 | 0.043767 |
| cg23253752 | chr15 | North Shore | 0.678203113 | 0.907554787 | 0.2293517 | 1.51E-05 |
| cg22081933 | chr15 | Island      | 0.669704012 | 0.898723725 | 0.2290197 | 0.000388 |
| cg21573796 | chr15 | Open Sea    | 0.645137169 | 0.873678336 | 0.2285412 | 0.001171 |
| cg13403566 | chr15 | Open Sea    | 0.629963635 | 0.858401176 | 0.2284375 | 0.000507 |
| cg01325409 | chr15 | Open Sea    | 0.476624016 | 0.704671025 | 0.228047  | 0.003972 |
| cg15840949 | chr15 | Open Sea    | 0.675030992 | 0.902024202 | 0.2269932 | 0.000637 |
| cg25021884 | chr15 | Open Sea    | 0.581130912 | 0.807967754 | 0.2268368 | 0.003389 |
| cg22299719 | chr15 | Island      | 0.679285152 | 0.905035609 | 0.2257505 | 0.000151 |
| cg23935006 | chr15 | Open Sea    | 0.630846858 | 0.856303226 | 0.2254564 | 0.000301 |
| cg21177426 | chr15 | North Shore | 0.668736965 | 0.894058561 | 0.2253216 | 0.004599 |
| cg16100530 | chr15 | Open Sea    | 0.622670555 | 0.847439496 | 0.2247689 | 0.009165 |
| cg05977671 | chr15 | Open Sea    | 0.60722227  | 0.831696166 | 0.2244739 | 0.000993 |
| cg05149284 | chr15 | North Shelf | 0.606163246 | 0.829744827 | 0.2235816 | 0.001449 |
| cg11086410 | chr15 | Open Sea    | 0.690300008 | 0.913672115 | 0.2233721 | 0.00142  |
| cg16804165 | chr15 | South Shelf | 0.389906488 | 0.612535899 | 0.2226294 | 0.000332 |
| cg02454802 | chr15 | Open Sea    | 0.699895875 | 0.920817347 | 0.2209215 | 5.81E-05 |
| cg13330363 | chr15 | North Shelf | 0.683819468 | 0.904472204 | 0.2206527 | 0.000214 |
| cg13061237 | chr15 | Island      | 0.561681781 | 0.780057478 | 0.2183757 | 0.042567 |
| cg19331677 | chr15 | Island      | 0.65515041  | 0.872973805 | 0.2178234 | 0.000666 |
| cg15034009 | chr15 | Open Sea    | 0.659144828 | 0.876365453 | 0.2172206 | 0.001106 |
| cg03756778 | chr15 | Open Sea    | 0.700720055 | 0.917874628 | 0.2171546 | 0.00124  |
| cg13777513 | chr15 | North Shore | 0.591617693 | 0.808322381 | 0.2167047 | 0.009084 |
| cg13074682 | chr15 | Open Sea    | 0.636358307 | 0.851554894 | 0.2151966 | 0.000131 |
| cg06852058 | chr15 | North Shelf | 0.673222427 | 0.887241837 | 0.2140194 | 0.000441 |
| cg19991512 | chr15 | Open Sea    | 0.506789479 | 0.720553772 | 0.2137643 | 2.98E-08 |
| cg07345510 | chr15 | South Shore | 0.642202436 | 0.855398428 | 0.213196  | 8.78E-05 |
| cg19602938 | chr15 | Open Sea    | 0.657266417 | 0.870387959 | 0.2131215 | 0.013035 |
| cg10633664 | chr15 | Open Sea    | 0.615689729 | 0.828313375 | 0.2126236 | 0.017036 |
| cg25790435 | chr15 | Open Sea    | 0.654310248 | 0.866365265 | 0.212055  | 0.000164 |
| cg03492603 | chr15 | North Shelf | 0.660150631 | 0.871140613 | 0.21099   | 0.001166 |
| cg00090521 | chr15 | Open Sea    | 0.455318682 | 0.66570072  | 0.210382  | 0.005108 |
| cg13901000 | chr15 | Open Sea    | 0.566734806 | 0.775807737 | 0.2090729 | 0.001964 |
| cg25402228 | chr15 | North Shelf | 0.702752925 | 0.911404952 | 0.208652  | 0.00167  |
| cg05469591 | chr15 | South Shelf | 0.5151265   | 0.723687386 | 0.2085609 | 2.14E-05 |
| cg18827756 | chr15 | Open Sea    | 0.632519262 | 0.840401828 | 0.2078826 | 0.037326 |
| cg20368664 | chr15 | Open Sea    | 0.717808927 | 0.924437844 | 0.2066289 | 0.000674 |
| cg09783969 | chr15 | South Shelf | 0.410026803 | 0.61660021  | 0.2065734 | 0.013815 |
| cg14422338 | chr15 | North Shelf | 0.706303462 | 0.91217996  | 0.2058765 | 1.73E-05 |
| cg04844175 | chr15 | Open Sea    | 0.695489315 | 0.900837973 | 0.2053487 | 0.001926 |
| cg11269295 | chr15 | Open Sea    | 0.707958244 | 0.913298734 | 0.2053405 | 0.000143 |
| cg14403327 | chr15 | North Shore | 0.357847497 | 0.562704924 | 0.2048574 | 0.004459 |
| cg10394898 | chr15 | Open Sea    | 0.320733691 | 0.525243111 | 0.2045094 | 0.000214 |
| cg27053040 | chr15 | Open Sea    | 0.692310483 | 0.896739368 | 0.2044289 | 0.001135 |
| cg02168186 | chr15 | Open Sea    | 0.680202389 | 0.883715852 | 0.2035135 | 0.033612 |
| cg00333828 | chr15 | Open Sea    | 0.718206044 | 0.921702542 | 0.2034965 | 0.000557 |
| cg24831140 | chr15 | Open Sea    | 0.696585523 | 0.899921974 | 0.2033365 | 0.000922 |
| cg15023513 | chr15 | Open Sea    | 0.519229879 | 0.722137701 | 0.2029078 | 0.001973 |
| cg17878151 | chr15 | Open Sea    | 0.434949724 | 0.637802615 | 0.2028529 | 0.045204 |
| cg12868052 | chr15 | Open Sea    | 0.569309922 | 0.771765818 | 0.2024559 | 0.002142 |

|            |       |             |             |             |           |          |
|------------|-------|-------------|-------------|-------------|-----------|----------|
| cg17165475 | chr15 | Open Sea    | 0.686418598 | 0.888816386 | 0.2023978 | 0.000465 |
| cg20916068 | chr15 | Open Sea    | 0.621958948 | 0.824088128 | 0.2021292 | 0.002743 |
| cg22959260 | chr15 | Open Sea    | 0.713104523 | 0.915028102 | 0.2019236 | 0.00307  |
| cg12932248 | chr15 | Open Sea    | 0.681194533 | 0.882383253 | 0.2011887 | 0.000162 |
| cg05462446 | chr16 | Open Sea    | 0.307188394 | 0.785162293 | 0.4779739 | 1.38E-07 |
| cg02451516 | chr16 | Open Sea    | 0.448242657 | 0.918919427 | 0.4706768 | 5.81E-10 |
| cg00087792 | chr16 | Open Sea    | 0.365458021 | 0.82983386  | 0.4643758 | 0.000121 |
| cg03446244 | chr16 | Open Sea    | 0.32767439  | 0.790979438 | 0.463305  | 0.015946 |
| cg07811262 | chr16 | North Shelf | 0.421251071 | 0.877699458 | 0.4564484 | 4.8E-08  |
| cg10364862 | chr16 | Open Sea    | 0.465121901 | 0.912839884 | 0.447718  | 1.13E-09 |
| cg26837962 | chr16 | Open Sea    | 0.47459179  | 0.919093124 | 0.4445013 | 5.45E-11 |
| cg00549561 | chr16 | Open Sea    | 0.494112818 | 0.93727324  | 0.4431604 | 5.69E-12 |
| cg01973778 | chr16 | Open Sea    | 0.45111859  | 0.893780247 | 0.4426617 | 0.000684 |
| cg07695272 | chr16 | South Shelf | 0.444143986 | 0.882881071 | 0.4387371 | 0.000895 |
| cg07846061 | chr16 | North Shore | 0.266380821 | 0.69614657  | 0.4297657 | 1.53E-06 |
| cg07705739 | chr16 | Open Sea    | 0.445009893 | 0.87313292  | 0.428123  | 0.004224 |
| cg26519342 | chr16 | South Shore | 0.456069193 | 0.87784448  | 0.4217753 | 4.59E-08 |
| cg24794992 | chr16 | Open Sea    | 0.434017981 | 0.842027176 | 0.4080092 | 1.7E-07  |
| cg10457079 | chr16 | Open Sea    | 0.505544299 | 0.909829314 | 0.404285  | 1.07E-10 |
| cg06485166 | chr16 | Open Sea    | 0.534876366 | 0.937143788 | 0.4022674 | 5.27E-09 |
| cg05414254 | chr16 | North Shore | 0.390190165 | 0.790277892 | 0.4000877 | 0.002902 |
| cg09094037 | chr16 | Open Sea    | 0.507652998 | 0.90552043  | 0.3978674 | 1.35E-08 |
| cg02637247 | chr16 | North Shelf | 0.356781976 | 0.754093314 | 0.3973113 | 0.043442 |
| cg09232021 | chr16 | North Shelf | 0.529684443 | 0.923947842 | 0.3942634 | 2.25E-07 |
| cg07384019 | chr16 | Open Sea    | 0.518303536 | 0.912343479 | 0.3940399 | 0.003776 |
| cg16493071 | chr16 | North Shelf | 0.424751005 | 0.81604288  | 0.3912919 | 0.015844 |
| cg01108642 | chr16 | Open Sea    | 0.473915618 | 0.864813382 | 0.3908978 | 5.84E-08 |
| cg07196505 | chr16 | North Shelf | 0.3734507   | 0.753176329 | 0.3797256 | 8.98E-06 |
| cg10333594 | chr16 | North Shore | 0.518797161 | 0.894540255 | 0.3757431 | 4.99E-06 |
| cg03380791 | chr16 | Open Sea    | 0.492656067 | 0.863191412 | 0.3705353 | 1.3E-06  |
| cg08365638 | chr16 | Open Sea    | 0.445890063 | 0.816046134 | 0.3701561 | 0.001617 |
| cg09635036 | chr16 | Open Sea    | 0.456446654 | 0.826487293 | 0.3700406 | 0.007925 |
| cg04806571 | chr16 | Open Sea    | 0.506387997 | 0.874885808 | 0.3684978 | 3.66E-07 |
| cg02399788 | chr16 | Open Sea    | 0.53864664  | 0.905498502 | 0.3668519 | 3.63E-06 |
| cg06848199 | chr16 | Open Sea    | 0.412704567 | 0.777253267 | 0.3645487 | 0.000497 |
| cg09108394 | chr16 | South Shelf | 0.427744534 | 0.79182771  | 0.3640832 | 0.0172   |
| cg02525597 | chr16 | South Shelf | 0.435371354 | 0.796142448 | 0.3607711 | 3.77E-05 |
| cg03616148 | chr16 | Open Sea    | 0.405481018 | 0.765702455 | 0.3602214 | 0.001038 |
| cg08878567 | chr16 | Open Sea    | 0.438450719 | 0.797661117 | 0.3592104 | 0.047949 |
| cg07297322 | chr16 | Open Sea    | 0.556889421 | 0.914277213 | 0.3573878 | 8.38E-05 |
| cg08862366 | chr16 | Open Sea    | 0.494100563 | 0.851397091 | 0.3572965 | 7.05E-05 |
| cg04453792 | chr16 | North Shore | 0.519678352 | 0.874971913 | 0.3552936 | 9.83E-09 |
| cg05390712 | chr16 | Open Sea    | 0.514422585 | 0.869076055 | 0.3546535 | 8.73E-06 |
| cg04483701 | chr16 | Open Sea    | 0.356550969 | 0.710640975 | 0.35409   | 0.044239 |
| cg06288900 | chr16 | Open Sea    | 0.443490399 | 0.793817099 | 0.3503267 | 2.83E-05 |
| cg06530903 | chr16 | North Shelf | 0.392937826 | 0.742581799 | 0.349644  | 0.000739 |
| cg05902711 | chr16 | South Shore | 0.374895899 | 0.723208774 | 0.3483129 | 2.67E-06 |
| cg04329347 | chr16 | North Shore | 0.296179161 | 0.643066235 | 0.3468871 | 0.044636 |
| cg07957035 | chr16 | Open Sea    | 0.531003771 | 0.874531636 | 0.3435279 | 1.75E-05 |
| cg06537005 | chr16 | South Shore | 0.398519319 | 0.740110035 | 0.3415907 | 0.000254 |

|            |       |             |             |             |           |          |
|------------|-------|-------------|-------------|-------------|-----------|----------|
| cg26479028 | chr16 | Open Sea    | 0.459459478 | 0.800613274 | 0.3411538 | 3.12E-06 |
| cg01824618 | chr16 | North Shelf | 0.438069833 | 0.77803346  | 0.3399636 | 0.001827 |
| cg00519537 | chr16 | Open Sea    | 0.511633909 | 0.850481287 | 0.3388474 | 0.001816 |
| cg07631533 | chr16 | Open Sea    | 0.326566395 | 0.664815468 | 0.3382491 | 0.013237 |
| cg05794310 | chr16 | Open Sea    | 0.464016588 | 0.801768095 | 0.3377515 | 0.000674 |
| cg00731458 | chr16 | South Shelf | 0.527604439 | 0.865260188 | 0.3376557 | 2.82E-05 |
| cg05187154 | chr16 | Open Sea    | 0.506651689 | 0.844031642 | 0.33738   | 0.001655 |
| cg05483125 | chr16 | South Shelf | 0.386926923 | 0.723511791 | 0.3365849 | 0.008132 |
| cg00849365 | chr16 | Open Sea    | 0.419250561 | 0.753916288 | 0.3346657 | 6.24E-06 |
| cg05970874 | chr16 | South Shore | 0.475714711 | 0.808032305 | 0.3323176 | 0.000103 |
| cg16587832 | chr16 | Open Sea    | 0.57388126  | 0.90527932  | 0.3313981 | 9.8E-06  |
| cg03927470 | chr16 | Open Sea    | 0.510683508 | 0.842042862 | 0.3313594 | 4.09E-05 |
| cg19791043 | chr16 | Island      | 0.534147482 | 0.865169389 | 0.3310219 | 0.0032   |
| cg01027010 | chr16 | North Shelf | 0.530076375 | 0.860874674 | 0.3307983 | 8.44E-06 |
| cg04475868 | chr16 | Open Sea    | 0.569439266 | 0.898645235 | 0.329206  | 8.75E-07 |
| cg04930001 | chr16 | Open Sea    | 0.497444516 | 0.826386366 | 0.3289418 | 0.002787 |
| cg09133452 | chr16 | North Shelf | 0.604114712 | 0.931939343 | 0.3278246 | 2.4E-06  |
| cg06389098 | chr16 | Open Sea    | 0.494600422 | 0.819998884 | 0.3253985 | 0.000556 |
| cg27662639 | chr16 | South Shelf | 0.472290951 | 0.796394132 | 0.3241032 | 0.00504  |
| cg02168291 | chr16 | Open Sea    | 0.549657115 | 0.873614726 | 0.3239576 | 0.000636 |
| cg07570113 | chr16 | South Shore | 0.408074485 | 0.730496997 | 0.3224225 | 0.000133 |
| cg27081230 | chr16 | Open Sea    | 0.533180719 | 0.854215822 | 0.3210351 | 0.001604 |
| cg07369559 | chr16 | Open Sea    | 0.501580426 | 0.821486521 | 0.3199061 | 0.033847 |
| cg01372939 | chr16 | Open Sea    | 0.439288859 | 0.757088918 | 0.3178001 | 0.001908 |
| cg26651339 | chr16 | Open Sea    | 0.550421092 | 0.865915855 | 0.3154948 | 0.000431 |
| cg09046979 | chr16 | South Shore | 0.133203044 | 0.448568452 | 0.3153654 | 3.52E-12 |
| cg16774755 | chr16 | Open Sea    | 0.547364667 | 0.862599676 | 0.315235  | 1.97E-06 |
| cg04184273 | chr16 | South Shore | 0.463517781 | 0.778682771 | 0.315165  | 0.000319 |
| cg04228742 | chr16 | Open Sea    | 0.569042343 | 0.882843845 | 0.3138015 | 5.12E-06 |
| cg27183823 | chr16 | North Shore | 0.613761416 | 0.922640351 | 0.3088789 | 2E-06    |
| cg03840920 | chr16 | Open Sea    | 0.623558261 | 0.930084526 | 0.3065263 | 2.65E-07 |
| cg05370094 | chr16 | North Shore | 0.538675941 | 0.845145105 | 0.3064692 | 0.004141 |
| cg16658473 | chr16 | South Shore | 0.388615558 | 0.694901005 | 0.3062854 | 1.7E-05  |
| cg04231019 | chr16 | South Shelf | 0.289007199 | 0.594164249 | 0.3051571 | 0.020385 |
| cg02936347 | chr16 | Open Sea    | 0.419986786 | 0.723619199 | 0.3036324 | 0.030244 |
| cg03963720 | chr16 | North Shelf | 0.42212534  | 0.723161053 | 0.3010357 | 0.026041 |
| cg00356208 | chr16 | Open Sea    | 0.319455087 | 0.620189279 | 0.3007342 | 0.020539 |
| cg08676510 | chr16 | Open Sea    | 0.545057632 | 0.843515192 | 0.2984576 | 0.043026 |
| cg26672573 | chr16 | Open Sea    | 0.557297638 | 0.854553199 | 0.2972556 | 0.004603 |
| cg04031411 | chr16 | Open Sea    | 0.602931945 | 0.89965112  | 0.2967192 | 0.024652 |
| cg08534055 | chr16 | South Shelf | 0.417647724 | 0.712519559 | 0.2948718 | 0.000136 |
| cg07895124 | chr16 | Open Sea    | 0.506909738 | 0.800751612 | 0.2938419 | 0.003737 |
| cg27362010 | chr16 | North Shore | 0.133192512 | 0.426747118 | 0.2935546 | 0.02539  |
| cg04260557 | chr16 | South Shelf | 0.650934132 | 0.943059699 | 0.2921256 | 9.57E-05 |
| cg09256941 | chr16 | South Shore | 0.477655643 | 0.768831796 | 0.2911762 | 0.031654 |
| cg06009685 | chr16 | South Shelf | 0.281959484 | 0.573068222 | 0.2911087 | 0.003604 |
| cg16736889 | chr16 | Open Sea    | 0.521524829 | 0.812117867 | 0.290593  | 0.002441 |
| cg01403532 | chr16 | North Shelf | 0.420410621 | 0.710332535 | 0.2899219 | 0.003225 |
| cg02697654 | chr16 | Open Sea    | 0.559638756 | 0.849369237 | 0.2897305 | 0.003385 |
| cg02849507 | chr16 | Open Sea    | 0.304947898 | 0.594200288 | 0.2892524 | 0.017036 |

|            |       |             |             |             |           |          |
|------------|-------|-------------|-------------|-------------|-----------|----------|
| cg05764691 | chr16 | South Shore | 0.561974738 | 0.850383367 | 0.2884086 | 5.28E-05 |
| cg02973961 | chr16 | North Shore | 0.414635311 | 0.70244128  | 0.287806  | 8.92E-05 |
| cg07486170 | chr16 | Open Sea    | 0.581646716 | 0.868370607 | 0.2867239 | 0.00063  |
| cg06719334 | chr16 | Open Sea    | 0.587674545 | 0.873525692 | 0.2858511 | 0.000183 |
| cg06796709 | chr16 | Open Sea    | 0.559799357 | 0.845290393 | 0.285491  | 0.031397 |
| cg03832015 | chr16 | Open Sea    | 0.345443457 | 0.628314617 | 0.2828712 | 0.000689 |
| cg02495250 | chr16 | Open Sea    | 0.653644245 | 0.9353279   | 0.2816837 | 6.09E-05 |
| cg04721098 | chr16 | North Shore | 0.432956704 | 0.713611406 | 0.2806547 | 0.015218 |
| cg01123787 | chr16 | South Shore | 0.552601762 | 0.833170588 | 0.2805688 | 1.36E-06 |
| cg08066417 | chr16 | Open Sea    | 0.469817921 | 0.750384527 | 0.2805666 | 7.54E-05 |
| cg07456201 | chr16 | South Shelf | 0.54845456  | 0.827836773 | 0.2793822 | 0.003214 |
| cg04086239 | chr16 | Open Sea    | 0.469127187 | 0.747736572 | 0.2786094 | 0.00058  |
| cg01672042 | chr16 | Open Sea    | 0.606737087 | 0.885313026 | 0.2785759 | 1.16E-05 |
| cg27248474 | chr16 | North Shelf | 0.591759109 | 0.869820516 | 0.2780614 | 0.000295 |
| cg06074534 | chr16 | Open Sea    | 0.628066475 | 0.905599848 | 0.2775334 | 1.94E-05 |
| cg02556005 | chr16 | Open Sea    | 0.497867453 | 0.774275528 | 0.2764081 | 8.73E-05 |
| cg06127746 | chr16 | North Shore | 0.550836615 | 0.827129055 | 0.2762924 | 0.001152 |
| cg01661235 | chr16 | Open Sea    | 0.557575755 | 0.833496796 | 0.275921  | 0.034717 |
| cg16413327 | chr16 | South Shore | 0.602311886 | 0.876997985 | 0.2746861 | 0.004926 |
| cg27038676 | chr16 | Open Sea    | 0.395675951 | 0.670072015 | 0.2743961 | 7E-05    |
| cg00628919 | chr16 | Island      | 0.629521038 | 0.898366373 | 0.2688453 | 2.52E-05 |
| cg02738205 | chr16 | Open Sea    | 0.634752071 | 0.901950119 | 0.267198  | 6.02E-05 |
| cg09079882 | chr16 | North Shore | 0.312369442 | 0.579234642 | 0.2668652 | 0.003263 |
| cg08154066 | chr16 | Open Sea    | 0.591580827 | 0.857192469 | 0.2656116 | 0.006346 |
| cg03084838 | chr16 | South Shore | 0.362300352 | 0.627509217 | 0.2652089 | 0.011024 |
| cg08390979 | chr16 | Open Sea    | 0.435375942 | 0.699966424 | 0.2645905 | 0.000288 |
| cg16762408 | chr16 | Open Sea    | 0.628114166 | 0.891955003 | 0.2638408 | 0.000386 |
| cg02086457 | chr16 | Island      | 0.607579843 | 0.871144987 | 0.2635651 | 0.00045  |
| cg02073680 | chr16 | North Shelf | 0.512028657 | 0.774654088 | 0.2626254 | 0.007057 |
| cg04811706 | chr16 | North Shelf | 0.485107078 | 0.746504074 | 0.261397  | 0.006899 |
| cg02529523 | chr16 | Open Sea    | 0.659747485 | 0.9196607   | 0.2599132 | 0.00012  |
| cg02438026 | chr16 | Open Sea    | 0.527297148 | 0.787022198 | 0.2597251 | 0.000467 |
| cg02226672 | chr16 | Open Sea    | 0.588309014 | 0.847799203 | 0.2594902 | 0.043771 |
| cg09849600 | chr16 | Open Sea    | 0.665424735 | 0.924782059 | 0.2593573 | 3.48E-06 |
| cg24237576 | chr16 | North Shore | 0.563130358 | 0.822067317 | 0.258937  | 1.48E-07 |
| cg02415992 | chr16 | Open Sea    | 0.4257419   | 0.683591936 | 0.25785   | 0.049268 |
| cg04915974 | chr16 | Open Sea    | 0.641577681 | 0.898858478 | 0.2572808 | 0.007952 |
| cg02633398 | chr16 | North Shore | 0.370821529 | 0.62801114  | 0.2571896 | 0.000188 |
| cg07757094 | chr16 | Open Sea    | 0.53470643  | 0.790989525 | 0.2562831 | 0.027286 |
| cg02008627 | chr16 | Open Sea    | 0.566061599 | 0.822162682 | 0.2561011 | 0.000446 |
| cg02853850 | chr16 | South Shelf | 0.569699421 | 0.82500349  | 0.2553041 | 0.000169 |
| cg08514311 | chr16 | Open Sea    | 0.370259759 | 0.625136598 | 0.2548768 | 0.007441 |
| cg03860054 | chr16 | South Shore | 0.492363027 | 0.746913288 | 0.2545503 | 0.000267 |
| cg02968537 | chr16 | Open Sea    | 0.642818984 | 0.896888768 | 0.2540698 | 0.001423 |
| cg07192594 | chr16 | Open Sea    | 0.523564343 | 0.777061041 | 0.2534967 | 0.004192 |
| cg16484020 | chr16 | Open Sea    | 0.498062962 | 0.751267205 | 0.2532042 | 0.043729 |
| cg06521472 | chr16 | North Shelf | 0.5794567   | 0.832027708 | 0.252571  | 0.00251  |
| cg26665701 | chr16 | South Shelf | 0.601820756 | 0.853420371 | 0.2515996 | 0.003809 |
| cg03366891 | chr16 | Open Sea    | 0.584922083 | 0.836243876 | 0.2513218 | 3.85E-05 |
| cg00298919 | chr16 | Open Sea    | 0.655902967 | 0.906881721 | 0.2509788 | 0.000165 |

|            |       |             |             |             |           |          |
|------------|-------|-------------|-------------|-------------|-----------|----------|
| cg03993839 | chr16 | Open Sea    | 0.594330435 | 0.844179604 | 0.2498492 | 0.001781 |
| cg09606925 | chr16 | South Shelf | 0.586092405 | 0.834071389 | 0.247979  | 0.000359 |
| cg08197072 | chr16 | Open Sea    | 0.59158254  | 0.83951133  | 0.2479288 | 0.040269 |
| cg26735980 | chr16 | Open Sea    | 0.63735308  | 0.883479856 | 0.2461268 | 0.00024  |
| cg03284670 | chr16 | Open Sea    | 0.604041134 | 0.849160392 | 0.2451193 | 0.000236 |
| cg08966413 | chr16 | Open Sea    | 0.623186885 | 0.86827267  | 0.2450858 | 1.62E-06 |
| cg06886374 | chr16 | South Shore | 0.527502321 | 0.772318116 | 0.2448158 | 0.032021 |
| cg02923340 | chr16 | North Shore | 0.51957077  | 0.764199253 | 0.2446285 | 0.000611 |
| cg07273222 | chr16 | North Shore | 0.550009084 | 0.794414979 | 0.2444059 | 0.002002 |
| cg05938409 | chr16 | Open Sea    | 0.647577443 | 0.891864551 | 0.2442871 | 0.002201 |
| cg26586719 | chr16 | Open Sea    | 0.590865251 | 0.834751598 | 0.2438863 | 0.010048 |
| cg09996789 | chr16 | Island      | 0.6226246   | 0.866494252 | 0.2438697 | 0.000157 |
| cg06786295 | chr16 | Open Sea    | 0.604027864 | 0.847418127 | 0.2433903 | 0.007123 |
| cg07711387 | chr16 | Open Sea    | 0.543671905 | 0.786901805 | 0.2432299 | 0.011928 |
| cg08047086 | chr16 | Open Sea    | 0.320166202 | 0.562693679 | 0.2425275 | 0.011819 |
| cg06402315 | chr16 | Open Sea    | 0.626521913 | 0.868630569 | 0.2421087 | 0.001639 |
| cg08304547 | chr16 | Open Sea    | 0.660613753 | 0.902285082 | 0.2416713 | 0.000321 |
| cg07950469 | chr16 | South Shore | 0.632462363 | 0.874004639 | 0.2415423 | 0.000374 |
| cg03627489 | chr16 | Open Sea    | 0.494497679 | 0.734725108 | 0.2402274 | 0.023468 |
| cg07508446 | chr16 | Open Sea    | 0.613841608 | 0.854010637 | 0.240169  | 0.000534 |
| cg27077070 | chr16 | Open Sea    | 0.590122992 | 0.830032185 | 0.2399092 | 0.005732 |
| cg04899681 | chr16 | South Shore | 0.303150677 | 0.542929715 | 0.239779  | 0.031598 |
| cg08372350 | chr16 | North Shore | 0.633762468 | 0.87175164  | 0.2379892 | 8.27E-05 |
| cg02888243 | chr16 | North Shelf | 0.470447251 | 0.707942835 | 0.2374956 | 0.043223 |
| cg06293395 | chr16 | Open Sea    | 0.675743835 | 0.912455833 | 0.236712  | 2.71E-05 |
| cg16456576 | chr16 | North Shore | 0.650300284 | 0.886540489 | 0.2362402 | 0.000439 |
| cg08353479 | chr16 | North Shore | 0.564074109 | 0.800100542 | 0.2360264 | 2.57E-06 |
| cg07698811 | chr16 | Open Sea    | 0.603720598 | 0.839487778 | 0.2357672 | 0.000141 |
| cg07964754 | chr16 | North Shore | 0.546868543 | 0.782228234 | 0.2353597 | 0.027403 |
| cg16508627 | chr16 | Island      | 0.663304224 | 0.898328268 | 0.235024  | 8.97E-05 |
| cg16345311 | chr16 | Open Sea    | 0.489775955 | 0.724281379 | 0.2345054 | 0.004163 |
| cg21514871 | chr16 | South Shelf | 0.331525054 | 0.565720091 | 0.234195  | 0.020654 |
| cg16359034 | chr16 | Open Sea    | 0.583825992 | 0.817985286 | 0.2341593 | 5.15E-05 |
| cg01938514 | chr16 | Open Sea    | 0.653299569 | 0.887176321 | 0.2338768 | 0.001457 |
| cg08996445 | chr16 | South Shelf | 0.504551051 | 0.738229777 | 0.2336787 | 0.008491 |
| cg05966923 | chr16 | South Shelf | 0.64682414  | 0.880204037 | 0.2333799 | 9.22E-05 |
| cg04683824 | chr16 | North Shore | 0.489617535 | 0.722833084 | 0.2332155 | 0.044203 |
| cg26699420 | chr16 | South Shelf | 0.450913255 | 0.683814322 | 0.2329011 | 0.013731 |
| cg27612447 | chr16 | South Shore | 0.596356712 | 0.828883674 | 0.232527  | 0.043882 |
| cg09790780 | chr16 | Open Sea    | 0.621144945 | 0.853312455 | 0.2321675 | 0.002212 |
| cg08529399 | chr16 | Open Sea    | 0.629336069 | 0.860246767 | 0.2309107 | 0.049596 |
| cg00938266 | chr16 | South Shore | 0.709799789 | 0.939862496 | 0.2300627 | 0.000196 |
| cg04388863 | chr16 | Open Sea    | 0.658227356 | 0.887709644 | 0.2294823 | 0.000356 |
| cg26605476 | chr16 | North Shelf | 0.579545412 | 0.807522858 | 0.2279774 | 0.000474 |
| cg03804126 | chr16 | Open Sea    | 0.568166776 | 0.796111141 | 0.2279444 | 0.045498 |
| cg03973705 | chr16 | Open Sea    | 0.532926425 | 0.760830277 | 0.2279039 | 0.014967 |
| cg02205073 | chr16 | North Shelf | 0.516519423 | 0.74436485  | 0.2278454 | 0.048204 |
| cg06718533 | chr16 | Open Sea    | 0.658349244 | 0.885566064 | 0.2272168 | 0.000591 |
| cg09001143 | chr16 | Open Sea    | 0.634037776 | 0.861177112 | 0.2271393 | 0.016123 |
| cg06841964 | chr16 | South Shore | 0.532248838 | 0.758463674 | 0.2262148 | 0.041419 |

|            |       |             |             |             |           |          |
|------------|-------|-------------|-------------|-------------|-----------|----------|
| cg04653364 | chr16 | Open Sea    | 0.520010833 | 0.745867116 | 0.2258563 | 1.72E-05 |
| cg02632890 | chr16 | Island      | 0.652279454 | 0.87779789  | 0.2255184 | 0.000422 |
| cg02849719 | chr16 | Island      | 0.72059291  | 0.945013246 | 0.2244203 | 0.000585 |
| cg09967329 | chr16 | South Shore | 0.644236928 | 0.867767533 | 0.2235306 | 0.002015 |
| cg00465277 | chr16 | Open Sea    | 0.362242517 | 0.585736395 | 0.2234939 | 0.022744 |
| cg06424168 | chr16 | North Shore | 0.644439663 | 0.867108564 | 0.2226689 | 0.000438 |
| cg02524622 | chr16 | North Shelf | 0.661243642 | 0.883642223 | 0.2223986 | 0.000208 |
| cg09132909 | chr16 | Open Sea    | 0.547080396 | 0.769407461 | 0.2223271 | 0.000453 |
| cg01519508 | chr16 | Island      | 0.673269311 | 0.895460749 | 0.2221914 | 0.000461 |
| cg05545808 | chr16 | Island      | 0.61239462  | 0.834528359 | 0.2221337 | 7.22E-06 |
| cg01208855 | chr16 | Open Sea    | 0.625883471 | 0.847261302 | 0.2213778 | 0.001321 |
| cg06871736 | chr16 | Island      | 0.554707549 | 0.775038425 | 0.2203309 | 0.015889 |
| cg08284564 | chr16 | South Shore | 0.586877835 | 0.807045002 | 0.2201672 | 0.045274 |
| cg03040848 | chr16 | North Shore | 0.548572626 | 0.768580304 | 0.2200077 | 0.026238 |
| cg08278002 | chr16 | Open Sea    | 0.656434822 | 0.876408159 | 0.2199733 | 0.000833 |
| cg00793562 | chr16 | North Shore | 0.460189844 | 0.679590117 | 0.2194003 | 0.000125 |
| cg27124218 | chr16 | Open Sea    | 0.679775801 | 0.899165194 | 0.2193894 | 0.000509 |
| cg08011223 | chr16 | South Shore | 0.68835117  | 0.907368314 | 0.2190171 | 1.12E-05 |
| cg07130639 | chr16 | North Shore | 0.688808613 | 0.90752765  | 0.218719  | 0.000939 |
| cg03554962 | chr16 | Open Sea    | 0.521460654 | 0.740168951 | 0.2187083 | 0.011604 |
| cg08688816 | chr16 | North Shore | 0.683550814 | 0.901625436 | 0.2180746 | 3.3E-05  |
| cg02884149 | chr16 | Island      | 0.64542228  | 0.863393789 | 0.2179715 | 0.000361 |
| cg06794141 | chr16 | Open Sea    | 0.261575871 | 0.479176598 | 0.2176007 | 8.22E-06 |
| cg06204040 | chr16 | South Shelf | 0.636253404 | 0.853484734 | 0.2172313 | 0.008688 |
| cg06979726 | chr16 | North Shelf | 0.665892699 | 0.88226674  | 0.216374  | 0.030532 |
| cg00179196 | chr16 | Open Sea    | 0.478013655 | 0.69401552  | 0.2160019 | 0.045165 |
| cg05686118 | chr16 | Open Sea    | 0.437560191 | 0.653495357 | 0.2159352 | 0.036458 |
| cg27514538 | chr16 | Open Sea    | 0.6048298   | 0.820289351 | 0.2154596 | 0.012918 |
| cg26746669 | chr16 | Open Sea    | 0.698957101 | 0.914098809 | 0.2151417 | 0.000596 |
| cg08888510 | chr16 | Island      | 0.68479235  | 0.899432091 | 0.2146397 | 0.039757 |
| cg04810063 | chr16 | North Shelf | 0.406058998 | 0.619320448 | 0.2132614 | 0.003135 |
| cg04611161 | chr16 | Open Sea    | 0.364364753 | 0.576948184 | 0.2125834 | 0.007901 |
| cg05444556 | chr16 | North Shelf | 0.71385715  | 0.926416994 | 0.2125598 | 0.000533 |
| cg07294323 | chr16 | South Shore | 0.672345135 | 0.884720965 | 0.2123758 | 0.000592 |
| cg06052479 | chr16 | South Shelf | 0.686863264 | 0.899086879 | 0.2122236 | 0.003232 |
| cg07936456 | chr16 | South Shelf | 0.709477375 | 0.921200746 | 0.2117234 | 0.002892 |
| cg02371121 | chr16 | South Shelf | 0.665992342 | 0.877282431 | 0.2112901 | 0.000562 |
| cg05354904 | chr16 | Island      | 0.669399986 | 0.880015822 | 0.2106158 | 0.000106 |
| cg27639348 | chr16 | Open Sea    | 0.689362853 | 0.899902605 | 0.2105398 | 0.000648 |
| cg08456666 | chr16 | North Shore | 0.690353784 | 0.900893192 | 0.2105394 | 0.000656 |
| cg16414052 | chr16 | North Shore | 0.514647515 | 0.725077041 | 0.2104295 | 0.00766  |
| cg03503785 | chr16 | Open Sea    | 0.390314741 | 0.600013104 | 0.2096984 | 0.001182 |
| cg16625119 | chr16 | Open Sea    | 0.635615672 | 0.845147823 | 0.2095322 | 0.000108 |
| cg06170425 | chr16 | North Shore | 0.717312564 | 0.926561237 | 0.2092487 | 0.00106  |
| cg16746369 | chr16 | South Shore | 0.670339727 | 0.879298024 | 0.2089583 | 0.005023 |
| cg05944877 | chr16 | Open Sea    | 0.630577675 | 0.838269345 | 0.2076917 | 0.031887 |
| cg23092086 | chr16 | Open Sea    | 0.678840274 | 0.886340825 | 0.2075006 | 0.001892 |
| cg03607907 | chr16 | North Shore | 0.247968239 | 0.454452784 | 0.2064845 | 3.31E-06 |
| cg01709589 | chr16 | Open Sea    | 0.67197765  | 0.87820778  | 0.2062301 | 0.008416 |
| cg06823060 | chr16 | Open Sea    | 0.668286625 | 0.873087108 | 0.2048005 | 0.002081 |



|            |       |             |             |             |           |          |
|------------|-------|-------------|-------------|-------------|-----------|----------|
| cg05775980 | chr16 | North Shore | 0.706915209 | 0.911052811 | 0.2041376 | 0.019102 |
| cg03447361 | chr16 | Open Sea    | 0.424524018 | 0.628597762 | 0.2040737 | 0.004629 |
| cg04713188 | chr16 | North Shelf | 0.666417585 | 0.870412488 | 0.2039949 | 0.00526  |
| cg02485642 | chr16 | Island      | 0.634873651 | 0.838560516 | 0.2036869 | 0.006477 |
| cg26844180 | chr16 | South Shore | 0.620213006 | 0.823120542 | 0.2029075 | 0.001108 |
| cg02925248 | chr16 | North Shore | 0.655828812 | 0.858662859 | 0.202834  | 0.013376 |
| cg08177968 | chr16 | North Shore | 0.707475303 | 0.90942615  | 0.2019508 | 0.011927 |
| cg06431604 | chr16 | North Shelf | 0.699963762 | 0.901277992 | 0.2013142 | 6.45E-05 |
| cg02498177 | chr16 | Open Sea    | 0.640246266 | 0.841541764 | 0.2012955 | 0.023889 |
| cg08877257 | chr16 | South Shore | 0.629742388 | 0.830391948 | 0.2006496 | 4.41E-05 |
| cg09954348 | chr16 | North Shelf | 0.576325174 | 0.776382433 | 0.2000573 | 0.00653  |
| cg16398362 | chr17 | North Shore | 0.412311296 | 0.924845811 | 0.5125345 | 1.58E-10 |
| cg07309864 | chr17 | Open Sea    | 0.374930237 | 0.883113176 | 0.5081829 | 0.000532 |
| cg07329131 | chr17 | North Shore | 0.430707789 | 0.937364452 | 0.5066567 | 1.55E-08 |
| cg25078137 | chr17 | North Shore | 0.336832443 | 0.836701428 | 0.499869  | 0.006385 |
| cg19208681 | chr17 | North Shore | 0.327245899 | 0.796297612 | 0.4690517 | 0.01032  |
| cg12778183 | chr17 | North Shore | 0.488825352 | 0.947547731 | 0.4587224 | 9.39E-11 |
| cg12456432 | chr17 | South Shelf | 0.387359647 | 0.845831472 | 0.4584718 | 0.007199 |
| cg05873137 | chr17 | Open Sea    | 0.45126407  | 0.902927995 | 0.4516639 | 5.8E-10  |
| cg03929677 | chr17 | North Shore | 0.416752366 | 0.859406291 | 0.4426539 | 5.36E-10 |
| cg11863863 | chr17 | Open Sea    | 0.420557731 | 0.858697809 | 0.4381401 | 2.65E-07 |
| cg20318252 | chr17 | Open Sea    | 0.475830453 | 0.91359988  | 0.4377694 | 9.94E-06 |
| cg12491114 | chr17 | South Shore | 0.259300355 | 0.696740322 | 0.43744   | 0.002803 |
| cg00679711 | chr17 | Open Sea    | 0.462268722 | 0.875631147 | 0.4133624 | 1.02E-05 |
| cg00697286 | chr17 | Open Sea    | 0.372655037 | 0.782262321 | 0.4096073 | 0.022374 |
| cg22798362 | chr17 | South Shelf | 0.486305762 | 0.892395592 | 0.4060898 | 8.53E-05 |
| cg04248364 | chr17 | Open Sea    | 0.521807277 | 0.927462212 | 0.4056549 | 5.84E-08 |
| cg23903597 | chr17 | South Shelf | 0.472952068 | 0.870859622 | 0.3979076 | 0.004634 |
| cg03252568 | chr17 | South Shelf | 0.506310475 | 0.90261293  | 0.3963025 | 2.34E-08 |
| cg16768937 | chr17 | Open Sea    | 0.416949172 | 0.812426142 | 0.395477  | 1.41E-09 |
| cg19514854 | chr17 | Open Sea    | 0.399922145 | 0.795297244 | 0.3953751 | 7.86E-07 |
| cg11465466 | chr17 | Open Sea    | 0.512694335 | 0.907311973 | 0.3946176 | 1.19E-06 |
| cg02128572 | chr17 | Open Sea    | 0.517853364 | 0.908525825 | 0.3906725 | 7.79E-06 |
| cg18984165 | chr17 | Open Sea    | 0.506292463 | 0.892489849 | 0.3861974 | 2.99E-06 |
| cg24361391 | chr17 | Open Sea    | 0.401679969 | 0.783063786 | 0.3813838 | 0.021904 |
| cg06217769 | chr17 | Open Sea    | 0.346528516 | 0.727195674 | 0.3806672 | 0.0235   |
| cg18749404 | chr17 | Open Sea    | 0.521278352 | 0.901835267 | 0.3805569 | 1.04E-06 |
| cg07456480 | chr17 | Open Sea    | 0.307677726 | 0.686109943 | 0.3784322 | 0.028327 |
| cg25339112 | chr17 | North Shore | 0.379362273 | 0.757323703 | 0.3779614 | 3.58E-05 |
| cg02753719 | chr17 | Open Sea    | 0.432691598 | 0.810600014 | 0.3779084 | 0.032216 |
| cg25750004 | chr17 | North Shelf | 0.455240633 | 0.829592081 | 0.3743514 | 1.26E-05 |
| cg27608102 | chr17 | North Shelf | 0.323591842 | 0.697841891 | 0.37425   | 0.000118 |
| cg08041350 | chr17 | Open Sea    | 0.504375294 | 0.878426434 | 0.3740511 | 6.73E-05 |
| cg12742209 | chr17 | North Shore | 0.554345729 | 0.92820526  | 0.3738595 | 1.43E-09 |
| cg27217474 | chr17 | Island      | 0.503811552 | 0.876241553 | 0.37243   | 0.000457 |
| cg26673195 | chr17 | Open Sea    | 0.26857604  | 0.639121689 | 0.3705456 | 0.016011 |
| cg02666820 | chr17 | Open Sea    | 0.53524108  | 0.904358515 | 0.3691174 | 9.9E-08  |
| cg26980978 | chr17 | Open Sea    | 0.425097375 | 0.794016366 | 0.368919  | 0.019988 |
| cg11694120 | chr17 | Open Sea    | 0.46352372  | 0.831385383 | 0.3678617 | 4.85E-08 |
| cg24650913 | chr17 | South Shore | 0.501190957 | 0.868937494 | 0.3677465 | 6.9E-07  |

|            |       |             |             |             |           |          |
|------------|-------|-------------|-------------|-------------|-----------|----------|
| cg02123767 | chr17 | Open Sea    | 0.526650491 | 0.893486866 | 0.3668364 | 3.38E-05 |
| cg25227866 | chr17 | Open Sea    | 0.534409271 | 0.895358137 | 0.3609489 | 3.81E-08 |
| cg03421358 | chr17 | Open Sea    | 0.416316407 | 0.777201709 | 0.3608853 | 0.018237 |
| cg18121946 | chr17 | South Shelf | 0.486916783 | 0.846443946 | 0.3595272 | 0.022454 |
| cg11824564 | chr17 | South Shore | 0.484879867 | 0.843999295 | 0.3591194 | 7.29E-07 |
| cg08966188 | chr17 | South Shore | 0.459687645 | 0.817917208 | 0.3582296 | 3.61E-10 |
| cg06422947 | chr17 | Open Sea    | 0.514156371 | 0.87223963  | 0.3580833 | 2.76E-05 |
| cg20663846 | chr17 | Open Sea    | 0.413786016 | 0.771815599 | 0.3580296 | 0.004311 |
| cg20271620 | chr17 | North Shore | 0.511079339 | 0.868591291 | 0.357512  | 0.000105 |
| cg12243622 | chr17 | Open Sea    | 0.518457577 | 0.875827598 | 0.35737   | 2.56E-06 |
| cg18052222 | chr17 | South Shelf | 0.354766051 | 0.711832853 | 0.3570668 | 0.013476 |
| cg25382652 | chr17 | Open Sea    | 0.541276088 | 0.898151438 | 0.3568753 | 8.93E-08 |
| cg12223258 | chr17 | Open Sea    | 0.448719447 | 0.804889946 | 0.3561705 | 5.66E-05 |
| cg01430588 | chr17 | North Shore | 0.262298193 | 0.615420981 | 0.3531228 | 0.005592 |
| cg12127162 | chr17 | Open Sea    | 0.423343506 | 0.773755923 | 0.3504124 | 1.63E-09 |
| cg25416149 | chr17 | North Shelf | 0.573634541 | 0.919355037 | 0.3457205 | 2.73E-07 |
| cg00011616 | chr17 | Open Sea    | 0.447512161 | 0.789182389 | 0.3416702 | 0.007163 |
| cg11068289 | chr17 | South Shore | 0.278077889 | 0.618153354 | 0.3400755 | 0.002143 |
| cg19038490 | chr17 | Open Sea    | 0.535466887 | 0.875080417 | 0.3396135 | 0.000453 |
| cg03609435 | chr17 | Open Sea    | 0.507898293 | 0.843306863 | 0.3354086 | 0.000139 |
| cg11181726 | chr17 | South Shelf | 0.46893284  | 0.804313619 | 0.3353808 | 0.000454 |
| cg16008158 | chr17 | North Shelf | 0.594208255 | 0.927630581 | 0.3334223 | 3.93E-09 |
| cg26940676 | chr17 | North Shore | 0.495668955 | 0.828894629 | 0.3332257 | 1.72E-06 |
| cg24670000 | chr17 | South Shelf | 0.534819162 | 0.865278137 | 0.330459  | 2.2E-07  |
| cg23402144 | chr17 | Open Sea    | 0.53992303  | 0.870168588 | 0.3302456 | 0.025931 |
| cg22647738 | chr17 | Open Sea    | 0.454313633 | 0.783317426 | 0.3290038 | 0.006672 |
| cg05046306 | chr17 | North Shore | 0.510856836 | 0.836860836 | 0.326004  | 0.013234 |
| cg17873048 | chr17 | Island      | 0.616822256 | 0.941706097 | 0.3248838 | 3.09E-05 |
| cg18009704 | chr17 | Open Sea    | 0.541316489 | 0.865900694 | 0.3245842 | 1.27E-05 |
| cg15797314 | chr17 | Open Sea    | 0.509356393 | 0.832824799 | 0.3234684 | 0.008086 |
| cg24993735 | chr17 | Open Sea    | 0.414235102 | 0.736722852 | 0.3224877 | 4.68E-05 |
| cg27065254 | chr17 | Open Sea    | 0.506187776 | 0.826890195 | 0.3207024 | 0.003437 |
| cg03181104 | chr17 | North Shelf | 0.457720858 | 0.776839477 | 0.3191186 | 2.26E-07 |
| cg19786808 | chr17 | Island      | 0.539480723 | 0.858169601 | 0.3186889 | 0.009781 |
| cg26921881 | chr17 | Open Sea    | 0.424936986 | 0.742892111 | 0.3179551 | 8.12E-06 |
| cg11650648 | chr17 | Open Sea    | 0.274532913 | 0.592225455 | 0.3176925 | 2.56E-05 |
| cg19051015 | chr17 | Island      | 0.431523396 | 0.748867214 | 0.3173438 | 0.022298 |
| cg20772590 | chr17 | North Shore | 0.416936119 | 0.733613657 | 0.3166775 | 0.014156 |
| cg21204860 | chr17 | North Shore | 0.275067428 | 0.589807848 | 0.3147404 | 0.00184  |
| cg19654743 | chr17 | North Shore | 0.294375252 | 0.608693229 | 0.314318  | 0.002299 |
| cg04995095 | chr17 | Open Sea    | 0.529061921 | 0.842165146 | 0.3131032 | 2E-05    |
| cg20830994 | chr17 | Open Sea    | 0.319632196 | 0.632205787 | 0.3125736 | 0.029994 |
| cg03803009 | chr17 | Open Sea    | 0.53581857  | 0.847609195 | 0.3117906 | 1.37E-06 |
| cg06083483 | chr17 | Open Sea    | 0.296699499 | 0.60783146  | 0.311132  | 0.049615 |
| cg12437115 | chr17 | Open Sea    | 0.544241106 | 0.855153946 | 0.3109128 | 6.14E-06 |
| cg06755555 | chr17 | South Shore | 0.566623462 | 0.876883293 | 0.3102598 | 2.74E-06 |
| cg00275828 | chr17 | Open Sea    | 0.337044328 | 0.645443934 | 0.3083996 | 0.0364   |
| cg04018164 | chr17 | North Shelf | 0.584305702 | 0.892097703 | 0.307792  | 2.36E-06 |
| cg16658020 | chr17 | Open Sea    | 0.510065559 | 0.81686501  | 0.3067995 | 7.67E-06 |
| cg06226384 | chr17 | Open Sea    | 0.364968599 | 0.668748062 | 0.3037795 | 7.75E-07 |

|            |       |             |             |             |           |          |
|------------|-------|-------------|-------------|-------------|-----------|----------|
| cg25304136 | chr17 | Open Sea    | 0.535322393 | 0.837615681 | 0.3022933 | 4.51E-05 |
| cg17280134 | chr17 | Open Sea    | 0.411958808 | 0.712443078 | 0.3004843 | 0.030899 |
| cg22497847 | chr17 | North Shore | 0.37747767  | 0.677728417 | 0.3002507 | 0.04884  |
| cg05604487 | chr17 | Open Sea    | 0.507934862 | 0.808152898 | 0.300218  | 0.014493 |
| cg14234083 | chr17 | Open Sea    | 0.450328313 | 0.749922367 | 0.2995941 | 0.00612  |
| cg11583981 | chr17 | South Shore | 0.618309086 | 0.917389969 | 0.2990809 | 8.12E-06 |
| cg11824764 | chr17 | Open Sea    | 0.58334152  | 0.879455471 | 0.296114  | 9.78E-07 |
| cg26007445 | chr17 | Open Sea    | 0.631239497 | 0.924921788 | 0.2936823 | 5.92E-08 |
| cg13651224 | chr17 | Open Sea    | 0.572224164 | 0.865886231 | 0.2936621 | 0.001282 |
| cg11684549 | chr17 | Open Sea    | 0.436572089 | 0.729508633 | 0.2929365 | 0.000187 |
| cg11592852 | chr17 | Open Sea    | 0.43178798  | 0.724098614 | 0.2923106 | 0.000158 |
| cg27323792 | chr17 | North Shore | 0.617499544 | 0.908484673 | 0.2909851 | 1.08E-07 |
| cg06443231 | chr17 | Open Sea    | 0.628461404 | 0.91912344  | 0.290662  | 0.000326 |
| cg08011255 | chr17 | South Shore | 0.249461103 | 0.538469754 | 0.2890087 | 0.037787 |
| cg13415628 | chr17 | Open Sea    | 0.604607697 | 0.891839242 | 0.2872315 | 3.67E-07 |
| cg16050028 | chr17 | Open Sea    | 0.529038257 | 0.815918248 | 0.28688   | 9.24E-06 |
| cg26109145 | chr17 | South Shore | 0.516560621 | 0.803063698 | 0.2865031 | 0.027823 |
| cg09954813 | chr17 | Open Sea    | 0.647922891 | 0.933326708 | 0.2854038 | 3.06E-06 |
| cg04951638 | chr17 | Open Sea    | 0.598041226 | 0.883235391 | 0.2851942 | 1.48E-07 |
| cg01278654 | chr17 | Open Sea    | 0.464775111 | 0.748035048 | 0.2832599 | 0.007423 |
| cg14885762 | chr17 | North Shore | 0.48004631  | 0.762852471 | 0.2828062 | 0.004626 |
| cg12107247 | chr17 | Open Sea    | 0.408517995 | 0.690010035 | 0.281492  | 0.046545 |
| cg04115740 | chr17 | Open Sea    | 0.579333058 | 0.860221476 | 0.2808884 | 0.003228 |
| cg08030662 | chr17 | Open Sea    | 0.631494037 | 0.912332707 | 0.2808387 | 1.09E-05 |
| cg23760873 | chr17 | Open Sea    | 0.589293635 | 0.869643548 | 0.2803499 | 2.29E-05 |
| cg03570232 | chr17 | Open Sea    | 0.545764326 | 0.825806827 | 0.2800425 | 0.005976 |
| cg09249101 | chr17 | Open Sea    | 0.501407684 | 0.780476348 | 0.2790687 | 0.016106 |
| cg10654584 | chr17 | Open Sea    | 0.5277496   | 0.806774698 | 0.2790251 | 0.034935 |
| cg03599891 | chr17 | North Shelf | 0.53708051  | 0.815059405 | 0.2779789 | 0.013955 |
| cg03835038 | chr17 | Open Sea    | 0.459230518 | 0.736779502 | 0.277549  | 1.37E-06 |
| cg11661493 | chr17 | Open Sea    | 0.584387246 | 0.861909988 | 0.2775227 | 0.046271 |
| cg03728799 | chr17 | Open Sea    | 0.45839658  | 0.73523661  | 0.27684   | 0.001218 |
| cg16678925 | chr17 | Open Sea    | 0.440826989 | 0.717563664 | 0.2767367 | 0.002314 |
| cg22121495 | chr17 | Open Sea    | 0.536102773 | 0.811488691 | 0.2753859 | 0.003919 |
| cg07480367 | chr17 | Open Sea    | 0.492644097 | 0.767763875 | 0.2751198 | 0.000182 |
| cg17894008 | chr17 | Open Sea    | 0.650440668 | 0.924469671 | 0.274029  | 3.68E-05 |
| cg16637813 | chr17 | Open Sea    | 0.526635935 | 0.800527333 | 0.2738914 | 0.028799 |
| cg08459186 | chr17 | Open Sea    | 0.607651747 | 0.88108075  | 0.273429  | 0.032779 |
| cg11932707 | chr17 | Open Sea    | 0.57060793  | 0.841461205 | 0.2708533 | 2.83E-07 |
| cg05945230 | chr17 | Open Sea    | 0.587461172 | 0.858115    | 0.2706538 | 0.00177  |
| cg07941938 | chr17 | Open Sea    | 0.608260219 | 0.878803495 | 0.2705433 | 7.11E-05 |
| cg21745595 | chr17 | Open Sea    | 0.526798189 | 0.796125848 | 0.2693277 | 0.001129 |
| cg18520696 | chr17 | North Shelf | 0.586820087 | 0.855451825 | 0.2686317 | 0.004638 |
| cg00501366 | chr17 | Open Sea    | 0.629250507 | 0.897085013 | 0.2678345 | 0.000359 |
| cg22466653 | chr17 | North Shore | 0.557720347 | 0.823771163 | 0.2660508 | 5.07E-05 |
| cg05784862 | chr17 | Open Sea    | 0.392196336 | 0.656022204 | 0.2638259 | 0.04301  |
| cg26963545 | chr17 | South Shore | 0.518498968 | 0.782317665 | 0.2638187 | 9.24E-05 |
| cg05091736 | chr17 | Open Sea    | 0.595416229 | 0.8581247   | 0.2627085 | 0.002947 |
| cg07698804 | chr17 | North Shore | 0.519027312 | 0.781346972 | 0.2623197 | 0.000118 |
| cg19442493 | chr17 | Open Sea    | 0.329841402 | 0.591600215 | 0.2617588 | 1.23E-06 |

|            |       |             |             |             |           |          |
|------------|-------|-------------|-------------|-------------|-----------|----------|
| cg25607161 | chr17 | Open Sea    | 0.531218469 | 0.792346194 | 0.2611277 | 0.011025 |
| cg03052469 | chr17 | North Shore | 0.555941095 | 0.816856216 | 0.2609151 | 0.004838 |
| cg03296502 | chr17 | North Shore | 0.574275186 | 0.834185429 | 0.2599102 | 0.004194 |
| cg21925688 | chr17 | Open Sea    | 0.586725145 | 0.845839963 | 0.2591148 | 2.95E-06 |
| cg12776756 | chr17 | South Shelf | 0.348702508 | 0.605622337 | 0.2569198 | 1.01E-06 |
| cg18264219 | chr17 | Open Sea    | 0.603421613 | 0.860058769 | 0.2566372 | 0.000359 |
| cg16023337 | chr17 | Open Sea    | 0.63040303  | 0.886900861 | 0.2564978 | 3.85E-05 |
| cg11478481 | chr17 | South Shore | 0.541917713 | 0.798345181 | 0.2564275 | 0.016945 |
| cg26738437 | chr17 | Open Sea    | 0.503519454 | 0.759793294 | 0.2562738 | 1.13E-06 |
| cg18450810 | chr17 | Open Sea    | 0.513737544 | 0.769215624 | 0.2554781 | 0.040255 |
| cg08901867 | chr17 | Open Sea    | 0.593588548 | 0.847542777 | 0.2539542 | 0.023876 |
| cg21005054 | chr17 | Open Sea    | 0.650311391 | 0.903791872 | 0.2534805 | 0.000167 |
| cg20813798 | chr17 | Open Sea    | 0.532294752 | 0.78465242  | 0.2523577 | 0.006999 |
| cg02448679 | chr17 | South Shore | 0.518694981 | 0.770944627 | 0.2522496 | 9.57E-07 |
| cg19241878 | chr17 | Open Sea    | 0.523091849 | 0.775038919 | 0.2519471 | 0.018089 |
| cg26924392 | chr17 | Open Sea    | 0.438140877 | 0.690054157 | 0.2519133 | 0.003202 |
| cg24948406 | chr17 | Island      | 0.685577333 | 0.935812761 | 0.2502354 | 0.001501 |
| cg26457700 | chr17 | North Shore | 0.53271818  | 0.782340254 | 0.2496221 | 0.006598 |
| cg25650956 | chr17 | Open Sea    | 0.491143806 | 0.740182433 | 0.2490386 | 0.003724 |
| cg03145062 | chr17 | Open Sea    | 0.665951158 | 0.914630927 | 0.2486798 | 0.000259 |
| cg03953828 | chr17 | South Shore | 0.404547579 | 0.653047832 | 0.2485003 | 0.000196 |
| cg24878374 | chr17 | North Shelf | 0.630978063 | 0.879346487 | 0.2483684 | 0.048879 |
| cg15668538 | chr17 | Open Sea    | 0.623374861 | 0.871670861 | 0.248296  | 0.008432 |
| cg09201238 | chr17 | Island      | 0.563003061 | 0.810796645 | 0.2477936 | 0.045582 |
| cg13521991 | chr17 | Open Sea    | 0.618498954 | 0.866014033 | 0.2475151 | 0.000989 |
| cg01455398 | chr17 | Open Sea    | 0.398954593 | 0.646171859 | 0.2472173 | 0.000376 |
| cg00755287 | chr17 | Open Sea    | 0.556869534 | 0.80382257  | 0.246953  | 0.029552 |
| cg03881382 | chr17 | Open Sea    | 0.582289735 | 0.829081913 | 0.2467922 | 0.005413 |
| cg25219874 | chr17 | South Shore | 0.676233836 | 0.922847151 | 0.2466133 | 0.000175 |
| cg08973688 | chr17 | North Shelf | 0.456326917 | 0.702572829 | 0.2462459 | 0.016157 |
| cg03882071 | chr17 | Open Sea    | 0.550501792 | 0.796187523 | 0.2456857 | 0.019013 |
| cg16034562 | chr17 | Open Sea    | 0.629181434 | 0.87468863  | 0.2455072 | 0.008566 |
| cg16764236 | chr17 | Open Sea    | 0.579221993 | 0.823894484 | 0.2446725 | 0.002753 |
| cg21016445 | chr17 | South Shelf | 0.534398809 | 0.778899826 | 0.244501  | 0.029039 |
| cg11334406 | chr17 | South Shore | 0.41819857  | 0.661892346 | 0.2436938 | 0.000317 |
| cg22349442 | chr17 | Open Sea    | 0.425432206 | 0.668771236 | 0.243339  | 0.024656 |
| cg18098089 | chr17 | Open Sea    | 0.63741412  | 0.880718837 | 0.2433047 | 7.41E-05 |
| cg20556988 | chr17 | Open Sea    | 0.606986702 | 0.850065002 | 0.2430783 | 0.000401 |
| cg02706575 | chr17 | Open Sea    | 0.631213501 | 0.874288072 | 0.2430746 | 3.26E-05 |
| cg14592673 | chr17 | Open Sea    | 0.512787879 | 0.754858209 | 0.2420703 | 0.001731 |
| cg15328609 | chr17 | South Shelf | 0.623217027 | 0.864438125 | 0.2412211 | 0.002209 |
| cg03662398 | chr17 | Open Sea    | 0.544360948 | 0.785278002 | 0.2409171 | 0.028153 |
| cg07029411 | chr17 | Open Sea    | 0.588475862 | 0.829062344 | 0.2405865 | 0.004448 |
| cg25680014 | chr17 | South Shelf | 0.554466468 | 0.7947001   | 0.2402336 | 0.047709 |
| cg23636055 | chr17 | South Shelf | 0.6185383   | 0.857583937 | 0.2390456 | 0.001826 |
| cg11805745 | chr17 | Open Sea    | 0.636106604 | 0.874852354 | 0.2387457 | 1.81E-05 |
| cg25748524 | chr17 | Open Sea    | 0.646043949 | 0.884050037 | 0.2380061 | 0.008018 |
| cg07835141 | chr17 | Open Sea    | 0.541492336 | 0.77921602  | 0.2377237 | 0.000886 |
| cg21509889 | chr17 | South Shelf | 0.397817607 | 0.635177553 | 0.2373599 | 1.54E-05 |
| cg07742017 | chr17 | North Shelf | 0.653115244 | 0.889852278 | 0.236737  | 0.000279 |

|            |       |             |             |             |           |          |
|------------|-------|-------------|-------------|-------------|-----------|----------|
| cg24238929 | chr17 | Open Sea    | 0.653000201 | 0.888483455 | 0.2354833 | 0.004314 |
| cg10691395 | chr17 | South Shelf | 0.649643357 | 0.885114514 | 0.2354712 | 0.002112 |
| cg18217668 | chr17 | Open Sea    | 0.700959274 | 0.93625663  | 0.2352974 | 0.000953 |
| cg26763542 | chr17 | Open Sea    | 0.632756391 | 0.867937356 | 0.235181  | 0.001441 |
| cg17170819 | chr17 | North Shore | 0.6108586   | 0.845589041 | 0.2347304 | 0.003944 |
| cg27543385 | chr17 | Open Sea    | 0.483520712 | 0.717508118 | 0.2339874 | 0.000747 |
| cg26090020 | chr17 | North Shelf | 0.620812004 | 0.854701621 | 0.2338896 | 0.003168 |
| cg07452879 | chr17 | Open Sea    | 0.48005743  | 0.71382261  | 0.2337652 | 3.9E-05  |
| cg21042139 | chr17 | Open Sea    | 0.612162857 | 0.845365366 | 0.2332025 | 0.024765 |
| cg08100284 | chr17 | Open Sea    | 0.634721731 | 0.867408458 | 0.2326867 | 0.000326 |
| cg07429804 | chr17 | Open Sea    | 0.696501968 | 0.929115399 | 0.2326134 | 4.62E-06 |
| cg03958863 | chr17 | Open Sea    | 0.631865243 | 0.86406984  | 0.2322046 | 0.000325 |
| cg21516305 | chr17 | Open Sea    | 0.539321504 | 0.771183208 | 0.2318617 | 0.013779 |
| cg13120756 | chr17 | South Shore | 0.627569551 | 0.85936543  | 0.2317959 | 1.11E-05 |
| cg05530484 | chr17 | Open Sea    | 0.598733434 | 0.830266377 | 0.2315329 | 0.029608 |
| cg12253845 | chr17 | Open Sea    | 0.49756249  | 0.728991424 | 0.2314289 | 0.00919  |
| cg17052783 | chr17 | South Shelf | 0.658819264 | 0.890035577 | 0.2312163 | 0.000811 |
| cg01714553 | chr17 | Open Sea    | 0.493486488 | 0.724683835 | 0.2311973 | 0.000162 |
| cg22184944 | chr17 | Open Sea    | 0.391593901 | 0.622740886 | 0.231147  | 0.005337 |
| cg12472416 | chr17 | South Shelf | 0.453100921 | 0.684191285 | 0.2310904 | 1.54E-06 |
| cg15618347 | chr17 | Open Sea    | 0.690796984 | 0.921808147 | 0.2310112 | 0.00065  |
| cg23259289 | chr17 | Open Sea    | 0.639921206 | 0.870771882 | 0.2308507 | 0.000495 |
| cg09529165 | chr17 | North Shelf | 0.656676932 | 0.887522389 | 0.2308455 | 0.000277 |
| cg05000772 | chr17 | North Shore | 0.612006368 | 0.84246327  | 0.2304569 | 0.000343 |
| cg27504861 | chr17 | Open Sea    | 0.515783718 | 0.7461453   | 0.2303616 | 0.014892 |
| cg08823240 | chr17 | Open Sea    | 0.365454873 | 0.595582542 | 0.2301277 | 0.00109  |
| cg20992503 | chr17 | Open Sea    | 0.629083805 | 0.858889993 | 0.2298062 | 0.00603  |
| cg04380107 | chr17 | Open Sea    | 0.506415337 | 0.735996627 | 0.2295813 | 0.000896 |
| cg22718140 | chr17 | Open Sea    | 0.580177239 | 0.809390717 | 0.2292135 | 0.003085 |
| cg17124387 | chr17 | North Shore | 0.65146942  | 0.880532194 | 0.2290628 | 0.000205 |
| cg12120406 | chr17 | Open Sea    | 0.645255309 | 0.874244542 | 0.2289892 | 0.002463 |
| cg12584528 | chr17 | Island      | 0.622505515 | 0.85124849  | 0.228743  | 0.004    |
| cg04307853 | chr17 | North Shelf | 0.564363588 | 0.792571388 | 0.2282078 | 0.006991 |
| cg16093580 | chr17 | Open Sea    | 0.662477958 | 0.88927876  | 0.2268008 | 0.000468 |
| cg03066080 | chr17 | Open Sea    | 0.573006686 | 0.799428928 | 0.2264222 | 0.004538 |
| cg17314478 | chr17 | North Shelf | 0.525280522 | 0.75072973  | 0.2254492 | 0.006352 |
| cg10177465 | chr17 | Open Sea    | 0.470359339 | 0.695579348 | 0.22522   | 6.62E-05 |
| cg03450734 | chr17 | Open Sea    | 0.493288878 | 0.718470756 | 0.2251819 | 0.012884 |
| cg11871064 | chr17 | Open Sea    | 0.686171975 | 0.910924447 | 0.2247525 | 0.000478 |
| cg04289585 | chr17 | Open Sea    | 0.729177747 | 0.9530936   | 0.2239159 | 0.000251 |
| cg05250241 | chr17 | North Shelf | 0.61451368  | 0.838256837 | 0.2237432 | 0.000584 |
| cg25561792 | chr17 | Open Sea    | 0.645206216 | 0.868886313 | 0.2236801 | 0.016423 |
| cg23845168 | chr17 | Open Sea    | 0.705113519 | 0.92785087  | 0.2227374 | 0.016121 |
| cg05814100 | chr17 | South Shelf | 0.683120306 | 0.905748975 | 0.2226287 | 0.000482 |
| cg20478261 | chr17 | Open Sea    | 0.637835061 | 0.859811046 | 0.221976  | 0.000262 |
| cg08929103 | chr17 | North Shore | 0.678820565 | 0.900571193 | 0.2217506 | 0.001445 |
| cg05861697 | chr17 | Island      | 0.675866692 | 0.897539519 | 0.2216728 | 0.00074  |
| cg24754689 | chr17 | Open Sea    | 0.637387284 | 0.85869403  | 0.2213067 | 0.008926 |
| cg23983106 | chr17 | Open Sea    | 0.652433011 | 0.87361947  | 0.2211865 | 0.005377 |
| cg13027184 | chr17 | Island      | 0.651429566 | 0.872233565 | 0.220804  | 0.004792 |

|            |       |             |             |             |           |          |
|------------|-------|-------------|-------------|-------------|-----------|----------|
| cg27562840 | chr17 | Open Sea    | 0.627073351 | 0.84754782  | 0.2204745 | 0.000165 |
| cg17792108 | chr17 | Open Sea    | 0.600159562 | 0.820373842 | 0.2202143 | 0.005057 |
| cg15524101 | chr17 | North Shore | 0.653559047 | 0.873667569 | 0.2201085 | 0.003031 |
| cg10437722 | chr17 | Open Sea    | 0.660272172 | 0.87938522  | 0.219113  | 0.000265 |
| cg15082257 | chr17 | Open Sea    | 0.61454821  | 0.83254983  | 0.2180016 | 0.034725 |
| cg09010992 | chr17 | Open Sea    | 0.622374458 | 0.840192821 | 0.2178184 | 0.004934 |
| cg03275201 | chr17 | North Shelf | 0.653614977 | 0.871419409 | 0.2178044 | 0.000147 |
| cg24870391 | chr17 | Open Sea    | 0.431155106 | 0.648937253 | 0.2177821 | 0.04748  |
| cg19447923 | chr17 | Open Sea    | 0.676948169 | 0.894069119 | 0.2171209 | 0.000532 |
| cg18984823 | chr17 | North Shelf | 0.636548858 | 0.853021047 | 0.2164722 | 0.001516 |
| cg23110019 | chr17 | South Shore | 0.459273133 | 0.675123543 | 0.2158504 | 1.59E-05 |
| cg15894365 | chr17 | South Shelf | 0.684745295 | 0.90055019  | 0.2158049 | 0.000134 |
| cg27623948 | chr17 | Open Sea    | 0.522940684 | 0.738730942 | 0.2157903 | 0.000879 |
| cg20558091 | chr17 | Open Sea    | 0.554206909 | 0.769928384 | 0.2157215 | 0.033089 |
| cg02320721 | chr17 | South Shore | 0.682835935 | 0.898490195 | 0.2156543 | 0.000326 |
| cg07203490 | chr17 | Open Sea    | 0.691992665 | 0.907571645 | 0.215579  | 0.000141 |
| cg03553897 | chr17 | South Shore | 0.471392    | 0.685937253 | 0.2145453 | 3.43E-05 |
| cg10922232 | chr17 | Open Sea    | 0.142700141 | 0.357184534 | 0.2144844 | 6.45E-09 |
| cg25988830 | chr17 | South Shelf | 0.53485684  | 0.748273964 | 0.2134171 | 0.038074 |
| cg19698340 | chr17 | Open Sea    | 0.709057545 | 0.921982375 | 0.2129248 | 0.000142 |
| cg10334489 | chr17 | Open Sea    | 0.524676368 | 0.737597562 | 0.2129212 | 0.013746 |
| cg24513522 | chr17 | Open Sea    | 0.452016128 | 0.664371649 | 0.2123555 | 0.002435 |
| cg03060036 | chr17 | South Shelf | 0.629177593 | 0.841327084 | 0.2121495 | 0.000517 |
| cg02779724 | chr17 | Open Sea    | 0.535815341 | 0.747952656 | 0.2121373 | 0.00194  |
| cg02829285 | chr17 | Open Sea    | 0.696281879 | 0.908330383 | 0.2120485 | 0.00387  |
| cg13074687 | chr17 | North Shore | 0.367967007 | 0.579999731 | 0.2120327 | 0.018433 |
| cg12391328 | chr17 | South Shore | 0.494473659 | 0.705917652 | 0.211444  | 0.000243 |
| cg10962223 | chr17 | Open Sea    | 0.460905872 | 0.672206281 | 0.2113004 | 0.004667 |
| cg10070101 | chr17 | North Shelf | 0.43747908  | 0.648730874 | 0.2112518 | 0.016604 |
| cg21479786 | chr17 | Open Sea    | 0.684469469 | 0.89542615  | 0.2109567 | 0.001215 |
| cg14256699 | chr17 | South Shelf | 0.672902926 | 0.883744417 | 0.2108415 | 0.000113 |
| cg07661564 | chr17 | Open Sea    | 0.614903514 | 0.82564468  | 0.2107412 | 0.016316 |
| cg25017223 | chr17 | Open Sea    | 0.639386171 | 0.849548852 | 0.2101627 | 0.009956 |
| cg13178709 | chr17 | South Shelf | 0.643984556 | 0.853982081 | 0.2099975 | 0.015906 |
| cg02385411 | chr17 | South Shelf | 0.670173494 | 0.880100627 | 0.2099271 | 0.004111 |
| cg05249074 | chr17 | North Shore | 0.533015747 | 0.742941553 | 0.2099258 | 0.002038 |
| cg22495124 | chr17 | Open Sea    | 0.734596448 | 0.944092292 | 0.2094958 | 0.000895 |
| cg16928046 | chr17 | South Shore | 0.664003606 | 0.873427371 | 0.2094238 | 0.028415 |
| cg13362627 | chr17 | Open Sea    | 0.533631485 | 0.742872943 | 0.2092415 | 0.006985 |
| cg19716073 | chr17 | North Shore | 0.667297325 | 0.875892258 | 0.2085949 | 0.002239 |
| cg23753610 | chr17 | Open Sea    | 0.702437668 | 0.910988598 | 0.2085509 | 0.003143 |
| cg10332979 | chr17 | Open Sea    | 0.689272472 | 0.897000119 | 0.2077276 | 0.009844 |
| cg20842396 | chr17 | Open Sea    | 0.694065469 | 0.901537258 | 0.2074718 | 0.016889 |
| cg24615251 | chr17 | Open Sea    | 0.716886055 | 0.924306627 | 0.2074206 | 0.000237 |
| cg05220510 | chr17 | Open Sea    | 0.61902877  | 0.826188459 | 0.2071597 | 0.048041 |
| cg03174407 | chr17 | Open Sea    | 0.619876835 | 0.826222869 | 0.206346  | 0.011114 |
| cg19171919 | chr17 | North Shore | 0.64911036  | 0.855280318 | 0.20617   | 0.039162 |
| cg25616535 | chr17 | North Shelf | 0.169755809 | 0.375664508 | 0.2059087 | 0.000374 |
| cg11910759 | chr17 | Open Sea    | 0.616475714 | 0.821729781 | 0.2052541 | 0.030681 |
| cg23400451 | chr17 | Open Sea    | 0.639459924 | 0.844558678 | 0.2050988 | 0.006393 |

|            |       |             |             |             |           |          |
|------------|-------|-------------|-------------|-------------|-----------|----------|
| cg22482278 | chr17 | North Shore | 0.711705917 | 0.91671017  | 0.2050043 | 0.000668 |
| cg19725098 | chr17 | Open Sea    | 0.700773385 | 0.9052438   | 0.2044704 | 2.43E-05 |
| cg15207426 | chr17 | Open Sea    | 0.651773851 | 0.856001039 | 0.2042272 | 0.007779 |
| cg03072195 | chr17 | Open Sea    | 0.618673758 | 0.822765119 | 0.2040914 | 0.002835 |
| cg27407935 | chr17 | North Shelf | 0.174926355 | 0.378874181 | 0.2039478 | 7.26E-08 |
| cg27573344 | chr17 | South Shore | 0.685759087 | 0.889088107 | 0.203329  | 0.000156 |
| cg17675301 | chr17 | North Shore | 0.665083724 | 0.867485429 | 0.2024017 | 1.57E-05 |
| cg03508063 | chr17 | South Shore | 0.329142048 | 0.531368665 | 0.2022266 | 9.63E-06 |
| cg02867514 | chr17 | Open Sea    | 0.519926281 | 0.721938439 | 0.2020122 | 0.001563 |
| cg12989650 | chr17 | Open Sea    | 0.675765851 | 0.877493724 | 0.2017279 | 0.006613 |
| cg06569861 | chr17 | Open Sea    | 0.385270741 | 0.58695848  | 0.2016877 | 0.00066  |
| cg10089081 | chr17 | Open Sea    | 0.726986099 | 0.928442143 | 0.201456  | 0.002385 |
| cg16301599 | chr17 | Open Sea    | 0.596621011 | 0.797787159 | 0.2011661 | 0.024699 |
| cg18272307 | chr17 | Open Sea    | 0.605663086 | 0.806773111 | 0.20111   | 0.000377 |
| cg25820602 | chr17 | Open Sea    | 0.704921924 | 0.905290284 | 0.2003684 | 0.001315 |
| cg13758221 | chr17 | Open Sea    | 0.694310455 | 0.894613543 | 0.2003031 | 0.001331 |
| cg22239325 | chr18 | Open Sea    | 0.498638386 | 0.940807693 | 0.4421693 | 5.16E-09 |
| cg12776287 | chr18 | North Shore | 0.316769921 | 0.748596933 | 0.431827  | 1.03E-10 |
| cg12573871 | chr18 | Open Sea    | 0.380571812 | 0.803923874 | 0.4233521 | 5.67E-07 |
| cg17007693 | chr18 | South Shore | 0.454782128 | 0.875130883 | 0.4203488 | 0.000509 |
| cg19605931 | chr18 | South Shelf | 0.507689314 | 0.909740706 | 0.4020514 | 3.63E-07 |
| cg06397427 | chr18 | South Shelf | 0.480436846 | 0.882254507 | 0.4018177 | 0.000355 |
| cg13442966 | chr18 | Open Sea    | 0.514057425 | 0.91534034  | 0.4012829 | 1.36E-09 |
| cg03560685 | chr18 | Open Sea    | 0.563359677 | 0.936833482 | 0.3734738 | 4.25E-08 |
| cg21107579 | chr18 | Open Sea    | 0.531436474 | 0.896541963 | 0.3651055 | 1.01E-08 |
| cg15224291 | chr18 | Open Sea    | 0.493840224 | 0.834059642 | 0.3402194 | 9.97E-07 |
| cg24972087 | chr18 | South Shore | 0.517319287 | 0.853962242 | 0.336643  | 0.040776 |
| cg23327011 | chr18 | Open Sea    | 0.596800686 | 0.929878168 | 0.3330775 | 3.29E-08 |
| cg15495463 | chr18 | Open Sea    | 0.592246169 | 0.92452696  | 0.3322808 | 1.56E-06 |
| cg07611666 | chr18 | Open Sea    | 0.519665283 | 0.850384594 | 0.3307193 | 0.000379 |
| cg16546376 | chr18 | Open Sea    | 0.54529217  | 0.874881492 | 0.3295893 | 0.026737 |
| cg18885289 | chr18 | North Shore | 0.619994138 | 0.945650899 | 0.3256568 | 6.41E-08 |
| cg05339403 | chr18 | North Shelf | 0.588268294 | 0.913074193 | 0.3248059 | 0.000211 |
| cg05955385 | chr18 | South Shelf | 0.510083376 | 0.807285658 | 0.2972023 | 0.016837 |
| cg15766996 | chr18 | South Shelf | 0.492093543 | 0.788519729 | 0.2964262 | 3.43E-05 |
| cg27638913 | chr18 | North Shore | 0.563395723 | 0.859802594 | 0.2964069 | 3.91E-06 |
| cg14298244 | chr18 | Open Sea    | 0.623854337 | 0.919504564 | 0.2956502 | 1.9E-06  |
| cg07054564 | chr18 | South Shore | 0.551681054 | 0.844400078 | 0.292719  | 0.001465 |
| cg12419932 | chr18 | South Shelf | 0.541411667 | 0.833207123 | 0.2917955 | 0.021377 |
| cg05353571 | chr18 | South Shore | 0.587162741 | 0.876843124 | 0.2896804 | 0.001865 |
| cg17112707 | chr18 | Open Sea    | 0.478449306 | 0.764039305 | 0.28559   | 9.42E-06 |
| cg22063692 | chr18 | Open Sea    | 0.586692575 | 0.870543954 | 0.2838514 | 3.26E-05 |
| cg14211837 | chr18 | Open Sea    | 0.623271338 | 0.904377951 | 0.2811066 | 0.003098 |
| cg15527308 | chr18 | Open Sea    | 0.546018889 | 0.820661225 | 0.2746423 | 0.006953 |
| cg14883070 | chr18 | Open Sea    | 0.50679174  | 0.776176437 | 0.2693847 | 0.018108 |
| cg18827787 | chr18 | Open Sea    | 0.489622471 | 0.755771716 | 0.2661492 | 0.00011  |
| cg26411672 | chr18 | North Shelf | 0.642052864 | 0.907957454 | 0.2659046 | 5.22E-05 |
| cg17804850 | chr18 | Island      | 0.56767268  | 0.832037181 | 0.2643645 | 0.018046 |
| cg27240008 | chr18 | Open Sea    | 0.626297013 | 0.890277031 | 0.26398   | 1.24E-06 |
| cg21615397 | chr18 | South Shore | 0.580210003 | 0.84198124  | 0.2617712 | 0.018414 |

|            |       |             |             |             |           |          |
|------------|-------|-------------|-------------|-------------|-----------|----------|
| cg11963233 | chr18 | North Shore | 0.63152655  | 0.892405495 | 0.2608789 | 2.11E-05 |
| cg21263710 | chr18 | North Shelf | 0.363294605 | 0.620044811 | 0.2567502 | 0.044178 |
| cg25321854 | chr18 | North Shelf | 0.524188585 | 0.780861136 | 0.2566726 | 0.000865 |
| cg03396005 | chr18 | South Shelf | 0.659957028 | 0.912826589 | 0.2528696 | 0.000363 |
| cg05155520 | chr18 | Open Sea    | 0.654374212 | 0.901696408 | 0.2473222 | 9.85E-05 |
| cg21298444 | chr18 | North Shelf | 0.478120707 | 0.725406731 | 0.247286  | 0.000468 |
| cg14462017 | chr18 | Open Sea    | 0.614987554 | 0.859701367 | 0.2447138 | 0.04324  |
| cg05817118 | chr18 | South Shelf | 0.624202597 | 0.867348256 | 0.2431457 | 0.000311 |
| cg22341513 | chr18 | North Shelf | 0.353087562 | 0.59604692  | 0.2429594 | 0.036174 |
| cg00710343 | chr18 | Open Sea    | 0.678958588 | 0.921604035 | 0.2426454 | 5.43E-05 |
| cg19718771 | chr18 | North Shore | 0.600895644 | 0.842773365 | 0.2418777 | 0.000661 |
| cg21078966 | chr18 | Open Sea    | 0.576373944 | 0.81484915  | 0.2384752 | 0.011939 |
| cg22306155 | chr18 | North Shelf | 0.608254169 | 0.846428033 | 0.2381739 | 0.000208 |
| cg00226904 | chr18 | Open Sea    | 0.631503139 | 0.869294597 | 0.2377915 | 0.000382 |
| cg10054857 | chr18 | Open Sea    | 0.575997503 | 0.810793718 | 0.2347962 | 0.016462 |
| cg02937491 | chr18 | Open Sea    | 0.643671875 | 0.87796705  | 0.2342952 | 3.55E-05 |
| cg19738924 | chr18 | North Shore | 0.563143409 | 0.792234428 | 0.229091  | 0.000296 |
| cg21807034 | chr18 | Open Sea    | 0.656938177 | 0.882086096 | 0.2251479 | 0.000383 |
| cg25331919 | chr18 | South Shelf | 0.636796009 | 0.86064466  | 0.2238487 | 0.019537 |
| cg23875391 | chr18 | North Shelf | 0.458774841 | 0.682287781 | 0.2235129 | 0.014267 |
| cg05662839 | chr18 | Island      | 0.680311163 | 0.902022953 | 0.2217118 | 0.003274 |
| cg21322241 | chr18 | Open Sea    | 0.682877029 | 0.90206072  | 0.2191837 | 0.000778 |
| cg02832905 | chr18 | Open Sea    | 0.652836781 | 0.87061624  | 0.2177795 | 0.00121  |
| cg25369616 | chr18 | North Shelf | 0.685997965 | 0.903431398 | 0.2174334 | 0.000261 |
| cg15227168 | chr18 | South Shore | 0.684319985 | 0.901192314 | 0.2168723 | 0.000944 |
| cg14642773 | chr18 | South Shore | 0.53769566  | 0.754315881 | 0.2166202 | 0.037814 |
| cg27511678 | chr18 | North Shore | 0.275997232 | 0.485008244 | 0.209011  | 0.021182 |
| cg16326062 | chr18 | Open Sea    | 0.651938776 | 0.859325393 | 0.2073866 | 2.83E-05 |
| cg01249134 | chr18 | North Shelf | 0.455463638 | 0.660088056 | 0.2046244 | 4.99E-06 |
| cg21737734 | chr18 | Island      | 0.714698526 | 0.919036558 | 0.204338  | 0.000237 |
| cg02862461 | chr18 | Open Sea    | 0.624371106 | 0.828500519 | 0.2041294 | 0.005075 |
| cg06069685 | chr18 | Open Sea    | 0.556843567 | 0.7602545   | 0.2034109 | 0.033742 |
| cg07807210 | chr18 | Island      | 0.716114546 | 0.918100441 | 0.2019859 | 0.000206 |
| cg19051117 | chr19 | North Shore | 0.319200663 | 0.731626612 | 0.4124259 | 4.28E-07 |
| cg09923953 | chr19 | South Shelf | 0.461838498 | 0.849574959 | 0.3877365 | 5.48E-07 |
| cg16592658 | chr19 | Open Sea    | 0.295736454 | 0.675711485 | 0.379975  | 0.012884 |
| cg20542190 | chr19 | Open Sea    | 0.255173993 | 0.630773048 | 0.3755991 | 0.010568 |
| cg25517015 | chr19 | South Shelf | 0.482017309 | 0.856290825 | 0.3742735 | 1.78E-08 |
| cg07988171 | chr19 | Open Sea    | 0.44628734  | 0.819638978 | 0.3733516 | 1.79E-07 |
| cg03602500 | chr19 | Open Sea    | 0.545618354 | 0.913952219 | 0.3683339 | 3.71E-05 |
| cg24048949 | chr19 | South Shelf | 0.404387682 | 0.770654061 | 0.3662664 | 0.002944 |
| cg06579354 | chr19 | Open Sea    | 0.261066026 | 0.627168533 | 0.3661025 | 3.84E-08 |
| cg12134408 | chr19 | North Shelf | 0.525329787 | 0.89108492  | 0.3657551 | 4.29E-07 |
| cg14899960 | chr19 | South Shore | 0.505939548 | 0.870550568 | 0.364611  | 0.00396  |
| cg18044044 | chr19 | Open Sea    | 0.510356062 | 0.874187053 | 0.363831  | 6.16E-07 |
| cg25730098 | chr19 | Open Sea    | 0.497693789 | 0.855784843 | 0.3580911 | 6.62E-07 |
| cg15642666 | chr19 | North Shore | 0.478284738 | 0.834733148 | 0.3564484 | 0.002259 |
| cg19372504 | chr19 | South Shelf | 0.598405853 | 0.946705837 | 0.3483    | 9.42E-08 |
| cg14894368 | chr19 | Open Sea    | 0.535971182 | 0.882704495 | 0.3467333 | 0.001508 |
| cg24299913 | chr19 | Island      | 0.517530018 | 0.860305244 | 0.3427752 | 7.06E-05 |



|            |       |             |             |             |           |          |
|------------|-------|-------------|-------------|-------------|-----------|----------|
| cg02358804 | chr19 | Open Sea    | 0.587929666 | 0.926123316 | 0.3381936 | 2.98E-08 |
| cg24838240 | chr19 | Open Sea    | 0.503949169 | 0.839798369 | 0.3358492 | 0.000107 |
| cg25286393 | chr19 | Open Sea    | 0.382591926 | 0.718034991 | 0.3354431 | 0.00379  |
| cg13482327 | chr19 | North Shelf | 0.469604204 | 0.802726717 | 0.3331225 | 0.003517 |
| cg16693595 | chr19 | North Shelf | 0.507354183 | 0.829468743 | 0.3221146 | 2.64E-07 |
| cg01985343 | chr19 | North Shore | 0.53868574  | 0.858706906 | 0.3200212 | 0.037314 |
| cg02486096 | chr19 | North Shelf | 0.311313486 | 0.63085507  | 0.3195416 | 4.66E-05 |
| cg26367719 | chr19 | South Shore | 0.391626887 | 0.711089994 | 0.3194631 | 0.000836 |
| cg19031047 | chr19 | South Shore | 0.554461027 | 0.873599678 | 0.3191387 | 2.12E-05 |
| cg26663123 | chr19 | Open Sea    | 0.508970055 | 0.826338664 | 0.3173686 | 9.86E-06 |
| cg16601904 | chr19 | North Shelf | 0.505893857 | 0.822157549 | 0.3162637 | 0.006823 |
| cg08882904 | chr19 | South Shelf | 0.57631232  | 0.888232175 | 0.3119199 | 5.81E-06 |
| cg03544379 | chr19 | Open Sea    | 0.605248764 | 0.917029312 | 0.3117805 | 1.58E-05 |
| cg08496123 | chr19 | South Shelf | 0.550622913 | 0.861722791 | 0.3110999 | 2.05E-05 |
| cg23228218 | chr19 | North Shelf | 0.517369762 | 0.827280403 | 0.3099106 | 0.004699 |
| cg23391173 | chr19 | Open Sea    | 0.533159939 | 0.841666149 | 0.3085062 | 1.58E-05 |
| cg22338152 | chr19 | Open Sea    | 0.467253748 | 0.77527725  | 0.3080235 | 0.000664 |
| cg10833393 | chr19 | Open Sea    | 0.347362601 | 0.654255877 | 0.3068933 | 0.030475 |
| cg25033144 | chr19 | Open Sea    | 0.5951945   | 0.90042052  | 0.305226  | 0.000474 |
| cg06943561 | chr19 | Open Sea    | 0.379748573 | 0.684853217 | 0.3051046 | 0.000292 |
| cg05358291 | chr19 | Open Sea    | 0.548642998 | 0.849360837 | 0.3007178 | 0.000113 |
| cg24154699 | chr19 | Open Sea    | 0.438087404 | 0.733471943 | 0.2953845 | 1.21E-05 |
| cg10322876 | chr19 | Open Sea    | 0.603128222 | 0.896355602 | 0.2932274 | 3.62E-05 |
| cg03601644 | chr19 | South Shore | 0.610726259 | 0.901768348 | 0.2910421 | 1.88E-05 |
| cg25460031 | chr19 | Open Sea    | 0.59504139  | 0.884636441 | 0.2895951 | 2.91E-05 |
| cg22911650 | chr19 | Open Sea    | 0.446679569 | 0.734985595 | 0.288306  | 0.028165 |
| cg02410867 | chr19 | Open Sea    | 0.618191099 | 0.906287681 | 0.2880966 | 3.82E-06 |
| cg17742051 | chr19 | South Shore | 0.615629572 | 0.900717341 | 0.2850878 | 0.000531 |
| cg23487859 | chr19 | North Shelf | 0.564646891 | 0.846539739 | 0.2818928 | 6.6E-05  |
| cg14086828 | chr19 | North Shelf | 0.486671627 | 0.768430084 | 0.2817585 | 0.001448 |
| cg25974922 | chr19 | North Shore | 0.480094261 | 0.761320206 | 0.2812259 | 0.032542 |
| cg03789934 | chr19 | Open Sea    | 0.327939264 | 0.609017535 | 0.2810783 | 3.42E-08 |
| cg27159916 | chr19 | South Shore | 0.54954656  | 0.83020114  | 0.2806546 | 0.035189 |
| cg22539584 | chr19 | South Shelf | 0.653404553 | 0.933347755 | 0.2799432 | 0.001253 |
| cg08703722 | chr19 | Open Sea    | 0.644042894 | 0.923397607 | 0.2793547 | 4.24E-05 |
| cg12581769 | chr19 | South Shelf | 0.559775546 | 0.8388074   | 0.2790319 | 0.047721 |
| cg00789198 | chr19 | Open Sea    | 0.615275846 | 0.893473471 | 0.2781976 | 4.16E-05 |
| cg01230207 | chr19 | Open Sea    | 0.574973251 | 0.852252366 | 0.2772791 | 0.00011  |
| cg00337020 | chr19 | South Shelf | 0.640207252 | 0.91621795  | 0.2760107 | 1.19E-05 |
| cg21638625 | chr19 | North Shore | 0.427223919 | 0.701348663 | 0.2741247 | 0.001508 |
| cg26979537 | chr19 | North Shore | 0.501109211 | 0.774459723 | 0.2733505 | 2.2E-06  |
| cg22498784 | chr19 | Open Sea    | 0.438659392 | 0.711884136 | 0.2732247 | 0.000334 |
| cg19521693 | chr19 | South Shore | 0.227526858 | 0.500173777 | 0.2726469 | 0.036559 |
| cg09235702 | chr19 | Open Sea    | 0.578890709 | 0.851527885 | 0.2726372 | 0.000462 |
| cg17857791 | chr19 | Open Sea    | 0.581840005 | 0.853953553 | 0.2721135 | 4.56E-05 |
| cg20670939 | chr19 | Open Sea    | 0.465128346 | 0.736725479 | 0.2715971 | 0.000183 |
| cg02258614 | chr19 | North Shore | 0.61489089  | 0.886176501 | 0.2712856 | 1.29E-05 |
| cg25996388 | chr19 | Open Sea    | 0.538916373 | 0.80768945  | 0.2687731 | 0.000478 |
| cg21606696 | chr19 | North Shore | 0.474372683 | 0.743019989 | 0.2686473 | 0.017432 |
| cg19236454 | chr19 | Open Sea    | 0.433034291 | 0.701185939 | 0.2681516 | 0.013468 |

|            |       |             |             |             |           |          |
|------------|-------|-------------|-------------|-------------|-----------|----------|
| cg26250400 | chr19 | South Shelf | 0.247703831 | 0.515619048 | 0.2679152 | 0.019666 |
| cg10305797 | chr19 | Open Sea    | 0.538534424 | 0.805850321 | 0.2673159 | 0.000218 |
| cg22545168 | chr19 | Open Sea    | 0.290951748 | 0.557811184 | 0.2668594 | 0.009817 |
| cg02593507 | chr19 | South Shore | 0.627363981 | 0.892628533 | 0.2652646 | 6.17E-05 |
| cg07612827 | chr19 | Open Sea    | 0.588710362 | 0.853792759 | 0.2650824 | 0.001152 |
| cg26562972 | chr19 | South Shelf | 0.636703335 | 0.901765737 | 0.2650624 | 6.04E-05 |
| cg01895124 | chr19 | North Shore | 0.623044442 | 0.887692896 | 0.2646485 | 2.49E-06 |
| cg18599533 | chr19 | North Shelf | 0.604402717 | 0.868798275 | 0.2643956 | 0.000663 |
| cg11971944 | chr19 | North Shelf | 0.547258758 | 0.811061911 | 0.2638032 | 0.03558  |
| cg25477163 | chr19 | South Shelf | 0.51660062  | 0.780248593 | 0.263648  | 0.003951 |
| cg11251554 | chr19 | Open Sea    | 0.408962147 | 0.670644878 | 0.2616827 | 0.007457 |
| cg23943495 | chr19 | North Shore | 0.489345316 | 0.75038821  | 0.2610429 | 0.00013  |
| cg01007458 | chr19 | Open Sea    | 0.39602142  | 0.656866043 | 0.2608446 | 7.78E-08 |
| cg06624020 | chr19 | South Shelf | 0.64388041  | 0.903743065 | 0.2598627 | 1.72E-05 |
| cg15061662 | chr19 | South Shelf | 0.609546509 | 0.869041174 | 0.2594947 | 0.00442  |
| cg18862215 | chr19 | Open Sea    | 0.50126998  | 0.760639301 | 0.2593693 | 1.19E-06 |
| cg15811427 | chr19 | Open Sea    | 0.554964737 | 0.81363971  | 0.258675  | 0.000193 |
| cg22846876 | chr19 | South Shelf | 0.594138563 | 0.852332459 | 0.2581939 | 1.46E-05 |
| cg03539717 | chr19 | North Shelf | 0.403697611 | 0.660523106 | 0.2568255 | 0.011686 |
| cg14575739 | chr19 | Open Sea    | 0.594473667 | 0.851263208 | 0.2567895 | 0.005324 |
| cg15221831 | chr19 | Island      | 0.634139111 | 0.889913326 | 0.2557742 | 0.000847 |
| cg14758105 | chr19 | North Shore | 0.606789681 | 0.862354437 | 0.2555648 | 0.001154 |
| cg11800802 | chr19 | North Shelf | 0.572342421 | 0.827602466 | 0.25526   | 0.002951 |
| cg09330551 | chr19 | South Shelf | 0.542852897 | 0.797095777 | 0.2542429 | 2.51E-05 |
| cg02746744 | chr19 | South Shelf | 0.533038046 | 0.786446699 | 0.2534087 | 0.000106 |
| cg25221254 | chr19 | Open Sea    | 0.625059977 | 0.878420513 | 0.2533605 | 0.008956 |
| cg25662428 | chr19 | South Shore | 0.577491489 | 0.829815322 | 0.2523238 | 4.72E-05 |
| cg26489750 | chr19 | Open Sea    | 0.550241586 | 0.80254144  | 0.2522999 | 0.024877 |
| cg08852641 | chr19 | Open Sea    | 0.169596496 | 0.421694701 | 0.2520982 | 0.012481 |
| cg18115248 | chr19 | Open Sea    | 0.643539722 | 0.89562011  | 0.2520804 | 8.02E-05 |
| cg10765336 | chr19 | North Shore | 0.600426887 | 0.852083961 | 0.2516571 | 0.000638 |
| cg04349727 | chr19 | Open Sea    | 0.578364325 | 0.829956267 | 0.2515919 | 0.000591 |
| cg01293740 | chr19 | South Shelf | 0.225104837 | 0.476241861 | 0.251137  | 0.031792 |
| cg26522157 | chr19 | Island      | 0.577074067 | 0.827529845 | 0.2504558 | 0.000664 |
| cg00996764 | chr19 | Open Sea    | 0.534211677 | 0.782244733 | 0.2480331 | 0.045586 |
| cg24136431 | chr19 | North Shore | 0.531655125 | 0.779472177 | 0.2478171 | 0.043642 |
| cg12986110 | chr19 | Open Sea    | 0.551909052 | 0.7985944   | 0.2466853 | 0.008968 |
| cg09430586 | chr19 | Open Sea    | 0.623628081 | 0.868882197 | 0.2452541 | 0.000169 |
| cg23919549 | chr19 | North Shore | 0.643946461 | 0.888448191 | 0.2445017 | 3.31E-05 |
| cg22190114 | chr19 | Open Sea    | 0.633069655 | 0.876881094 | 0.2438114 | 0.004265 |
| cg16594007 | chr19 | Open Sea    | 0.517750883 | 0.761088743 | 0.2433379 | 2.15E-05 |
| cg15701210 | chr19 | Open Sea    | 0.353545528 | 0.596701311 | 0.2431558 | 0.00077  |
| cg17772789 | chr19 | Open Sea    | 0.557222039 | 0.800142887 | 0.2429208 | 0.006333 |
| cg15402156 | chr19 | Open Sea    | 0.429186072 | 0.6719363   | 0.2427502 | 0.001903 |
| cg13650654 | chr19 | Open Sea    | 0.501910463 | 0.744626057 | 0.2427156 | 0.032114 |
| cg08684473 | chr19 | Open Sea    | 0.515177438 | 0.757891408 | 0.242714  | 0.020727 |
| cg02018326 | chr19 | Open Sea    | 0.47531995  | 0.717631097 | 0.2423111 | 0.000305 |
| cg22838050 | chr19 | South Shore | 0.516893852 | 0.756407696 | 0.2395138 | 3.03E-05 |
| cg05267952 | chr19 | Open Sea    | 0.519796041 | 0.759179403 | 0.2393834 | 2.71E-05 |
| cg05935086 | chr19 | Open Sea    | 0.3865853   | 0.622909821 | 0.2363245 | 0.000514 |

|            |       |             |             |             |           |          |
|------------|-------|-------------|-------------|-------------|-----------|----------|
| cg17670263 | chr19 | Open Sea    | 0.280846044 | 0.516357779 | 0.2355117 | 0.011043 |
| cg18745782 | chr19 | South Shore | 0.670957851 | 0.905375933 | 0.2344181 | 0.00102  |
| cg07676349 | chr19 | North Shore | 0.678734767 | 0.913139131 | 0.2344044 | 0.000646 |
| cg14203721 | chr19 | Open Sea    | 0.60865493  | 0.842879557 | 0.2342246 | 0.008317 |
| cg03745234 | chr19 | Open Sea    | 0.614213717 | 0.84810389  | 0.2338902 | 0.02733  |
| cg24314434 | chr19 | Open Sea    | 0.66145151  | 0.895118144 | 0.2336666 | 0.000305 |
| cg00376316 | chr19 | North Shelf | 0.51369395  | 0.746577865 | 0.2328839 | 0.009949 |
| cg05241571 | chr19 | Open Sea    | 0.533219926 | 0.763966697 | 0.2307468 | 0.001728 |
| cg08375658 | chr19 | South Shelf | 0.232258641 | 0.46115438  | 0.2288957 | 0.013602 |
| cg17510987 | chr19 | North Shore | 0.546516856 | 0.775234481 | 0.2287176 | 0.044738 |
| cg20789620 | chr19 | North Shore | 0.435379002 | 0.664095796 | 0.2287168 | 0.003353 |
| cg17724366 | chr19 | Open Sea    | 0.627173955 | 0.85562901  | 0.2284551 | 0.000415 |
| cg17952114 | chr19 | South Shore | 0.340618828 | 0.568860264 | 0.2282414 | 0.035277 |
| cg24824840 | chr19 | North Shore | 0.649378841 | 0.877461812 | 0.228083  | 0.00026  |
| cg09752223 | chr19 | Island      | 0.586289749 | 0.814071935 | 0.2277822 | 0.043687 |
| cg18693051 | chr19 | North Shore | 0.576318693 | 0.803596548 | 0.2272779 | 0.02212  |
| cg15586563 | chr19 | North Shelf | 0.646163181 | 0.873175478 | 0.2270123 | 0.000514 |
| cg20675971 | chr19 | Island      | 0.671100263 | 0.897961938 | 0.2268617 | 0.000454 |
| cg19035908 | chr19 | South Shore | 0.549706907 | 0.776548131 | 0.2268412 | 0.034289 |
| cg26003119 | chr19 | South Shore | 0.528386567 | 0.754894329 | 0.2265078 | 0.00036  |
| cg22486630 | chr19 | Island      | 0.615878243 | 0.842302118 | 0.2264239 | 0.000151 |
| cg02965351 | chr19 | North Shelf | 0.685064243 | 0.911320842 | 0.2262566 | 0.000198 |
| cg19017177 | chr19 | North Shore | 0.465743145 | 0.690829752 | 0.2250866 | 0.005122 |
| cg23342045 | chr19 | North Shore | 0.571967029 | 0.796373002 | 0.224406  | 0.015761 |
| cg04603355 | chr19 | South Shore | 0.594567258 | 0.818961993 | 0.2243947 | 0.018772 |
| cg20643675 | chr19 | Open Sea    | 0.492362079 | 0.716586474 | 0.2242244 | 0.000915 |
| cg04720596 | chr19 | North Shore | 0.593917272 | 0.817896607 | 0.2239793 | 3.51E-05 |
| cg04399789 | chr19 | North Shelf | 0.714737416 | 0.938269782 | 0.2235324 | 0.000191 |
| cg06862049 | chr19 | Island      | 0.339541839 | 0.561517902 | 0.2219761 | 0.002325 |
| cg24000937 | chr19 | Open Sea    | 0.517539557 | 0.738695237 | 0.2211557 | 0.000461 |
| cg11579116 | chr19 | Open Sea    | 0.392521081 | 0.612837001 | 0.2203159 | 0.034533 |
| cg01193293 | chr19 | Open Sea    | 0.629710347 | 0.84808973  | 0.2183794 | 0.014858 |
| cg11425517 | chr19 | North Shelf | 0.537883304 | 0.755926342 | 0.218043  | 0.003411 |
| cg17862867 | chr19 | North Shelf | 0.691959789 | 0.909988571 | 0.2180288 | 0.00111  |
| cg19328560 | chr19 | North Shelf | 0.588532557 | 0.805753147 | 0.2172206 | 0.019908 |
| cg22598669 | chr19 | North Shelf | 0.614611464 | 0.831692553 | 0.2170811 | 0.001195 |
| cg11553667 | chr19 | South Shelf | 0.626804934 | 0.843870108 | 0.2170652 | 0.017372 |
| cg01449341 | chr19 | Open Sea    | 0.646348992 | 0.862835741 | 0.2164867 | 0.002111 |
| cg26851500 | chr19 | Open Sea    | 0.676451925 | 0.892777082 | 0.2163252 | 0.000476 |
| cg01292613 | chr19 | Open Sea    | 0.66020733  | 0.875250034 | 0.2150427 | 0.001617 |
| cg15412721 | chr19 | South Shore | 0.652594851 | 0.867364403 | 0.2147696 | 0.008215 |
| cg19545560 | chr19 | South Shelf | 0.41996119  | 0.634314308 | 0.2143531 | 2.89E-06 |
| cg18597415 | chr19 | Open Sea    | 0.499145464 | 0.712490581 | 0.2133451 | 0.031087 |
| cg02415125 | chr19 | Open Sea    | 0.624517345 | 0.837833015 | 0.2133157 | 0.023484 |
| cg22532234 | chr19 | Open Sea    | 0.433586626 | 0.646582144 | 0.2129955 | 0.037831 |
| cg02272795 | chr19 | North Shore | 0.652392043 | 0.865136719 | 0.2127447 | 0.002725 |
| cg26470501 | chr19 | South Shore | 0.331434785 | 0.544152663 | 0.2127179 | 0.004163 |
| cg07797208 | chr19 | Open Sea    | 0.672468908 | 0.885146857 | 0.2126779 | 0.000276 |
| cg07902983 | chr19 | Island      | 0.260704279 | 0.472350735 | 0.2116465 | 8.15E-05 |
| cg17299616 | chr19 | Island      | 0.515312262 | 0.726755129 | 0.2114429 | 0.000483 |

|            |       |             |             |             |           |          |
|------------|-------|-------------|-------------|-------------|-----------|----------|
| cg00101104 | chr19 | Open Sea    | 0.552743921 | 0.763695921 | 0.210952  | 0.032585 |
| cg03240663 | chr19 | Open Sea    | 0.629207479 | 0.839908357 | 0.2107009 | 0.047295 |
| cg19449919 | chr19 | South Shelf | 0.660745069 | 0.87126045  | 0.2105154 | 0.009739 |
| cg20692181 | chr19 | North Shore | 0.584260283 | 0.794733075 | 0.2104728 | 0.001362 |
| cg24140775 | chr19 | Open Sea    | 0.668790185 | 0.87920905  | 0.2104189 | 0.017634 |
| cg03575041 | chr19 | Open Sea    | 0.408699298 | 0.618404458 | 0.2097052 | 0.010492 |
| cg03117053 | chr19 | Island      | 0.737402494 | 0.946896187 | 0.2094937 | 0.000499 |
| cg10130497 | chr19 | North Shore | 0.530256769 | 0.739707032 | 0.2094503 | 0.000585 |
| cg08155908 | chr19 | South Shelf | 0.696737629 | 0.905447167 | 0.2087095 | 0.008318 |
| cg07699930 | chr19 | South Shelf | 0.672973174 | 0.881101296 | 0.2081281 | 0.000147 |
| cg13979274 | chr19 | North Shelf | 0.530385884 | 0.737768922 | 0.207383  | 0.040488 |
| cg04958654 | chr19 | North Shore | 0.570743799 | 0.778067108 | 0.2073233 | 0.002581 |
| cg02319818 | chr19 | South Shore | 0.408538372 | 0.614965731 | 0.2064274 | 0.007871 |
| cg22472023 | chr19 | Open Sea    | 0.210412014 | 0.416563468 | 0.2061515 | 0.000725 |
| cg14005240 | chr19 | Open Sea    | 0.683633152 | 0.888994377 | 0.2053612 | 0.002647 |
| cg23385669 | chr19 | North Shelf | 0.658419522 | 0.863200867 | 0.2047813 | 0.039307 |
| cg26955996 | chr19 | Open Sea    | 0.566329415 | 0.770744631 | 0.2044152 | 0.031152 |
| cg12190413 | chr19 | North Shore | 0.548407674 | 0.752355544 | 0.2039479 | 0.006747 |
| cg24836679 | chr19 | South Shelf | 0.696783163 | 0.900366525 | 0.2035834 | 0.000171 |
| cg03531543 | chr19 | North Shelf | 0.690036556 | 0.893410972 | 0.2033744 | 0.000707 |
| cg01607441 | chr19 | Open Sea    | 0.594974428 | 0.797886957 | 0.2029125 | 0.00078  |
| cg05881698 | chr19 | North Shelf | 0.656149782 | 0.859032915 | 0.2028831 | 0.001135 |
| cg17387694 | chr19 | North Shelf | 0.692421562 | 0.89517299  | 0.2027514 | 0.001494 |
| cg25463943 | chr19 | Open Sea    | 0.603353183 | 0.806092295 | 0.2027391 | 0.006393 |
| cg07959016 | chr19 | Open Sea    | 0.620514151 | 0.823171071 | 0.2026569 | 0.002326 |
| cg27547695 | chr19 | Open Sea    | 0.684930934 | 0.887186371 | 0.2022554 | 0.001338 |
| cg19738281 | chr19 | North Shelf | 0.466388307 | 0.668497174 | 0.2021089 | 0.008152 |
| cg01080560 | chr19 | South Shelf | 0.61715847  | 0.817917971 | 0.2007595 | 0.003898 |
| cg07460734 | chr19 | North Shore | 0.591611261 | 0.792100589 | 0.2004893 | 0.023456 |
| cg17103314 | chr19 | Open Sea    | 0.685661207 | 0.886075951 | 0.2004147 | 0.000128 |
| cg11267879 | chr19 | Open Sea    | 0.439212859 | 0.639368978 | 0.2001561 | 0.035085 |
| cg06721806 | chr19 | Open Sea    | 0.606896569 | 0.807012691 | 0.2001161 | 0.006741 |
| cg10671757 | chr2  | North Shelf | 0.354721071 | 0.819981401 | 0.4652603 | 4.24E-09 |
| cg22638977 | chr2  | Open Sea    | 0.460184123 | 0.907865924 | 0.4476818 | 5.16E-09 |
| cg17338146 | chr2  | Open Sea    | 0.433227881 | 0.876250536 | 0.4430227 | 0.001673 |
| cg10081994 | chr2  | Open Sea    | 0.410100815 | 0.853073597 | 0.4429728 | 1.82E-08 |
| cg00214970 | chr2  | South Shore | 0.306991394 | 0.747979439 | 0.440988  | 0.003448 |
| cg02534072 | chr2  | Open Sea    | 0.422262547 | 0.857487219 | 0.4352247 | 2.52E-07 |
| cg20319457 | chr2  | Open Sea    | 0.453305176 | 0.884260555 | 0.4309554 | 9.81E-07 |
| cg03792788 | chr2  | South Shelf | 0.389227235 | 0.81366883  | 0.4244416 | 0.04935  |
| cg18519072 | chr2  | Open Sea    | 0.322417727 | 0.74635941  | 0.4239417 | 0.035085 |
| cg21335012 | chr2  | Open Sea    | 0.436513893 | 0.854470664 | 0.4179568 | 2.81E-05 |
| cg05862007 | chr2  | Open Sea    | 0.467249252 | 0.883214914 | 0.4159657 | 5.71E-05 |
| cg02514318 | chr2  | Open Sea    | 0.362817815 | 0.776836408 | 0.4140186 | 0.005667 |
| cg24396429 | chr2  | Open Sea    | 0.33365112  | 0.746652702 | 0.4130016 | 0.024324 |
| cg10263684 | chr2  | North Shelf | 0.524734261 | 0.936167385 | 0.4114331 | 3.36E-09 |
| cg00927256 | chr2  | Open Sea    | 0.262747795 | 0.671859479 | 0.4091117 | 1.12E-05 |
| cg23273465 | chr2  | South Shelf | 0.548251335 | 0.956660589 | 0.4084093 | 3.68E-11 |
| cg08727428 | chr2  | South Shore | 0.501187508 | 0.903621806 | 0.4024343 | 8.22E-09 |
| cg26214074 | chr2  | Open Sea    | 0.486364069 | 0.885995109 | 0.399631  | 4.96E-06 |

|            |      |             |             |             |           |          |
|------------|------|-------------|-------------|-------------|-----------|----------|
| cg14285788 | chr2 | North Shore | 0.284394338 | 0.683846585 | 0.3994522 | 3.1E-08  |
| cg19404500 | chr2 | North Shelf | 0.503807179 | 0.902833155 | 0.399026  | 2.66E-08 |
| cg03591285 | chr2 | North Shelf | 0.508145863 | 0.906306875 | 0.398161  | 3.19E-07 |
| cg03708221 | chr2 | Open Sea    | 0.406988275 | 0.805048697 | 0.3980604 | 0.042901 |
| cg00500424 | chr2 | South Shore | 0.533532342 | 0.930002055 | 0.3964697 | 4.08E-08 |
| cg09922612 | chr2 | Open Sea    | 0.483555753 | 0.879111755 | 0.395556  | 4.27E-08 |
| cg04876407 | chr2 | North Shelf | 0.290867523 | 0.683133418 | 0.3922659 | 4.41E-05 |
| cg24412829 | chr2 | South Shelf | 0.395151776 | 0.784298394 | 0.3891466 | 6.45E-06 |
| cg11009736 | chr2 | Open Sea    | 0.16500247  | 0.552529925 | 0.3875275 | 0.01569  |
| cg21627775 | chr2 | North Shelf | 0.485225628 | 0.871065974 | 0.3858403 | 0.001578 |
| cg24630383 | chr2 | South Shelf | 0.555329074 | 0.940401087 | 0.385072  | 3.83E-08 |
| cg21240640 | chr2 | Open Sea    | 0.505927998 | 0.890893127 | 0.3849651 | 3.41E-08 |
| cg09044294 | chr2 | Open Sea    | 0.525709026 | 0.908809721 | 0.3831007 | 5.8E-08  |
| cg15016481 | chr2 | Open Sea    | 0.462592575 | 0.845444021 | 0.3828514 | 0.02736  |
| cg09613510 | chr2 | Open Sea    | 0.440406659 | 0.82267082  | 0.3822642 | 0.04434  |
| cg10034572 | chr2 | South Shelf | 0.52042218  | 0.900586296 | 0.3801641 | 8.4E-09  |
| cg26381919 | chr2 | Open Sea    | 0.5325002   | 0.911874652 | 0.3793745 | 1.68E-09 |
| cg02050985 | chr2 | North Shore | 0.409073283 | 0.782113252 | 0.37304   | 0.004452 |
| cg25916135 | chr2 | Open Sea    | 0.285986204 | 0.658812858 | 0.3728267 | 0.000703 |
| cg01395254 | chr2 | Open Sea    | 0.450287593 | 0.819596324 | 0.3693087 | 3.19E-05 |
| cg27159979 | chr2 | Open Sea    | 0.490140673 | 0.85884421  | 0.3687035 | 0.038861 |
| cg14975547 | chr2 | Open Sea    | 0.456443615 | 0.824994998 | 0.3685514 | 0.000236 |
| cg10288578 | chr2 | Open Sea    | 0.4733805   | 0.840875817 | 0.3674953 | 5.1E-08  |
| cg12153668 | chr2 | Open Sea    | 0.483681997 | 0.850853868 | 0.3671719 | 0.007723 |
| cg09599529 | chr2 | Open Sea    | 0.533968511 | 0.898380263 | 0.3644118 | 4.17E-07 |
| cg25024442 | chr2 | Open Sea    | 0.503616132 | 0.866886302 | 0.3632702 | 2.31E-07 |
| cg18447587 | chr2 | Open Sea    | 0.465263671 | 0.827485111 | 0.3622214 | 0.003036 |
| cg07583848 | chr2 | Open Sea    | 0.526210953 | 0.888218262 | 0.3620073 | 1.61E-05 |
| cg01703780 | chr2 | Open Sea    | 0.356474505 | 0.717481398 | 0.3610069 | 2.13E-05 |
| cg00415424 | chr2 | Open Sea    | 0.434489917 | 0.794379054 | 0.3598891 | 0.033615 |
| cg11902863 | chr2 | Open Sea    | 0.208552887 | 0.568203901 | 0.359651  | 2.74E-05 |
| cg24749089 | chr2 | Open Sea    | 0.527754235 | 0.887252927 | 0.3594987 | 0.000108 |
| cg15545942 | chr2 | Open Sea    | 0.545248714 | 0.90323132  | 0.3579826 | 1.15E-07 |
| cg21520549 | chr2 | Open Sea    | 0.539488655 | 0.896778387 | 0.3572897 | 1.19E-07 |
| cg04955914 | chr2 | North Shore | 0.368941367 | 0.723105533 | 0.3541642 | 0.010474 |
| cg14660163 | chr2 | Open Sea    | 0.573714191 | 0.927082669 | 0.3533685 | 5.8E-10  |
| cg15293629 | chr2 | Open Sea    | 0.520274563 | 0.873502065 | 0.3532275 | 0.000254 |
| cg05879419 | chr2 | Open Sea    | 0.461155082 | 0.813193855 | 0.3520388 | 0.009064 |
| cg19475988 | chr2 | Open Sea    | 0.462635899 | 0.814326964 | 0.3516911 | 4.99E-05 |
| cg20699079 | chr2 | Open Sea    | 0.329661597 | 0.679469446 | 0.3498078 | 0.017495 |
| cg11786365 | chr2 | Open Sea    | 0.567727241 | 0.917240289 | 0.349513  | 2.99E-08 |
| cg02281854 | chr2 | Open Sea    | 0.300955739 | 0.649561207 | 0.3486055 | 5.27E-08 |
| cg02879423 | chr2 | North Shelf | 0.2852048   | 0.633493874 | 0.3482891 | 5.26E-06 |
| cg21857375 | chr2 | Open Sea    | 0.581255638 | 0.928116807 | 0.3468612 | 1.29E-07 |
| cg19098619 | chr2 | Open Sea    | 0.455161864 | 0.801300365 | 0.3461385 | 0.000141 |
| cg02054542 | chr2 | North Shore | 0.500424822 | 0.845009002 | 0.3445842 | 0.005427 |
| cg26632171 | chr2 | Open Sea    | 0.507470536 | 0.85191984  | 0.3444493 | 1.13E-05 |
| cg05417035 | chr2 | Open Sea    | 0.488320802 | 0.832446399 | 0.3441256 | 0.025304 |
| cg23753006 | chr2 | Open Sea    | 0.334865488 | 0.677586949 | 0.3427215 | 1.33E-06 |
| cg11038054 | chr2 | Open Sea    | 0.419607296 | 0.762112587 | 0.3425053 | 2.4E-05  |

|            |      |             |             |             |           |          |
|------------|------|-------------|-------------|-------------|-----------|----------|
| cg20424973 | chr2 | Open Sea    | 0.499737524 | 0.841491808 | 0.3417543 | 1.04E-05 |
| cg22762189 | chr2 | Open Sea    | 0.520361832 | 0.861880059 | 0.3415182 | 3.63E-08 |
| cg06949933 | chr2 | South Shore | 0.47973187  | 0.819475967 | 0.3397441 | 0.020955 |
| cg16862361 | chr2 | Open Sea    | 0.493540363 | 0.831403518 | 0.3378632 | 0.001002 |
| cg06165655 | chr2 | Open Sea    | 0.572220918 | 0.909019505 | 0.3367986 | 7.86E-07 |
| cg22877380 | chr2 | Open Sea    | 0.515986549 | 0.849962438 | 0.3339759 | 1.89E-07 |
| cg12271759 | chr2 | Open Sea    | 0.530141266 | 0.864076134 | 0.3339349 | 0.004959 |
| cg21484910 | chr2 | Open Sea    | 0.562920265 | 0.894913496 | 0.3319932 | 1.83E-06 |
| cg17007164 | chr2 | Open Sea    | 0.441969778 | 0.770556841 | 0.3285871 | 0.006573 |
| cg00612985 | chr2 | Open Sea    | 0.470873617 | 0.797541488 | 0.3266679 | 0.004446 |
| cg27005018 | chr2 | Open Sea    | 0.526036602 | 0.850997225 | 0.3249606 | 1.44E-08 |
| cg27531832 | chr2 | North Shore | 0.582097017 | 0.907004108 | 0.3249071 | 4.1E-05  |
| cg25952964 | chr2 | Open Sea    | 0.583847388 | 0.908682182 | 0.3248348 | 9.91E-07 |
| cg23822732 | chr2 | Open Sea    | 0.587441815 | 0.910309546 | 0.3228677 | 1.17E-05 |
| cg06431347 | chr2 | Open Sea    | 0.592934657 | 0.915438331 | 0.3225037 | 7.11E-05 |
| cg01137949 | chr2 | Open Sea    | 0.517003327 | 0.83862407  | 0.3216207 | 8.78E-05 |
| cg12208353 | chr2 | Open Sea    | 0.5330083   | 0.854559722 | 0.3215514 | 0.00016  |
| cg09842053 | chr2 | Open Sea    | 0.576923864 | 0.897461585 | 0.3205377 | 1.4E-07  |
| cg10962805 | chr2 | Open Sea    | 0.412676256 | 0.733158963 | 0.3204827 | 3E-05    |
| cg11348701 | chr2 | Open Sea    | 0.561371134 | 0.881361193 | 0.3199901 | 1.15E-06 |
| cg04880737 | chr2 | Open Sea    | 0.441096583 | 0.760863357 | 0.3197668 | 0.04276  |
| cg19995130 | chr2 | Open Sea    | 0.462216278 | 0.781777925 | 0.3195616 | 0.029309 |
| cg03462604 | chr2 | Open Sea    | 0.484261381 | 0.803676908 | 0.3194155 | 2.29E-05 |
| cg25446789 | chr2 | Open Sea    | 0.173333541 | 0.492512597 | 0.3191791 | 0.006649 |
| cg09527561 | chr2 | Open Sea    | 0.458463377 | 0.777431518 | 0.3189681 | 0.043152 |
| cg11990559 | chr2 | Open Sea    | 0.431455989 | 0.749570516 | 0.3181145 | 6.48E-05 |
| cg07698102 | chr2 | Open Sea    | 0.586849208 | 0.903411965 | 0.3165628 | 6.22E-07 |
| cg27587307 | chr2 | Open Sea    | 0.560105548 | 0.875741089 | 0.3156355 | 0.034937 |
| cg02444226 | chr2 | Open Sea    | 0.577050002 | 0.892460461 | 0.3154105 | 2.66E-06 |
| cg09398856 | chr2 | Open Sea    | 0.560813751 | 0.876014074 | 0.3152003 | 0.029129 |
| cg23339656 | chr2 | North Shore | 0.371679578 | 0.686213124 | 0.3145335 | 0.008665 |
| cg19106467 | chr2 | South Shelf | 0.534633082 | 0.848860538 | 0.3142275 | 2.93E-06 |
| cg10015668 | chr2 | South Shelf | 0.521213312 | 0.835194982 | 0.3139817 | 0.003744 |
| cg08756898 | chr2 | North Shore | 0.485253368 | 0.799076414 | 0.313823  | 1.17E-05 |
| cg22162312 | chr2 | North Shelf | 0.486415244 | 0.800018845 | 0.3136036 | 3.36E-07 |
| cg26140366 | chr2 | South Shore | 0.565843571 | 0.879207086 | 0.3133635 | 0.000264 |
| cg25617157 | chr2 | South Shelf | 0.583474539 | 0.894856672 | 0.3113821 | 7.57E-06 |
| cg07791987 | chr2 | Open Sea    | 0.51484995  | 0.826066552 | 0.3112166 | 0.024092 |
| cg25299371 | chr2 | Open Sea    | 0.469077728 | 0.780037733 | 0.31096   | 0.002746 |
| cg16177922 | chr2 | Open Sea    | 0.445457008 | 0.755930352 | 0.3104733 | 0.036187 |
| cg17335199 | chr2 | Open Sea    | 0.421005034 | 0.731279313 | 0.3102743 | 0.016685 |
| cg12251803 | chr2 | Open Sea    | 0.384789409 | 0.694609565 | 0.3098202 | 0.000163 |
| cg01998763 | chr2 | Open Sea    | 0.523342012 | 0.833083368 | 0.3097414 | 1.77E-07 |
| cg10115387 | chr2 | Open Sea    | 0.552750871 | 0.862141157 | 0.3093903 | 0.007251 |
| cg10597191 | chr2 | Open Sea    | 0.589293202 | 0.897048184 | 0.307755  | 3.76E-08 |
| cg11686208 | chr2 | Open Sea    | 0.595953848 | 0.903602951 | 0.3076491 | 1.54E-06 |
| cg20438915 | chr2 | South Shelf | 0.546764287 | 0.854342415 | 0.3075781 | 0.010089 |
| cg00017842 | chr2 | North Shelf | 0.424770202 | 0.732288522 | 0.3075183 | 0.017261 |
| cg10634568 | chr2 | Open Sea    | 0.356019551 | 0.663090852 | 0.3070713 | 0.030976 |
| cg11206634 | chr2 | North Shore | 0.402505537 | 0.708257505 | 0.305752  | 0.000108 |

|            |      |             |             |             |           |          |
|------------|------|-------------|-------------|-------------|-----------|----------|
| cg14947846 | chr2 | North Shore | 0.541548498 | 0.846552301 | 0.3050038 | 3.45E-06 |
| cg25623099 | chr2 | Open Sea    | 0.54595526  | 0.850354726 | 0.3043995 | 0.023149 |
| cg15478401 | chr2 | Open Sea    | 0.494679661 | 0.798843591 | 0.3041639 | 0.007817 |
| cg10776839 | chr2 | Open Sea    | 0.491417018 | 0.794577696 | 0.3031607 | 0.01457  |
| cg04062717 | chr2 | Open Sea    | 0.581296003 | 0.88378188  | 0.3024859 | 7.45E-07 |
| cg04774103 | chr2 | Open Sea    | 0.493063392 | 0.79472675  | 0.3016634 | 0.000519 |
| cg09538682 | chr2 | Open Sea    | 0.531809274 | 0.833371649 | 0.3015624 | 0.003682 |
| cg07776049 | chr2 | Open Sea    | 0.340257697 | 0.639489363 | 0.2992317 | 0.000939 |
| cg05973132 | chr2 | South Shelf | 0.56251546  | 0.861556313 | 0.2990409 | 6.63E-06 |
| cg17325595 | chr2 | Open Sea    | 0.523900981 | 0.822072587 | 0.2981716 | 3.64E-08 |
| cg24194279 | chr2 | Open Sea    | 0.606255524 | 0.904329731 | 0.2980742 | 0.00011  |
| cg25349939 | chr2 | Open Sea    | 0.512409451 | 0.810354823 | 0.2979454 | 1.31E-05 |
| cg24965243 | chr2 | North Shore | 0.506195303 | 0.802564793 | 0.2963695 | 0.001127 |
| cg18912768 | chr2 | Open Sea    | 0.459454211 | 0.755112639 | 0.2956584 | 0.019637 |
| cg04579254 | chr2 | Open Sea    | 0.555326062 | 0.850638909 | 0.2953128 | 1.39E-06 |
| cg01440796 | chr2 | Open Sea    | 0.624038238 | 0.918890145 | 0.2948519 | 5.37E-05 |
| cg12569835 | chr2 | Open Sea    | 0.47409705  | 0.768026689 | 0.2939296 | 6.99E-07 |
| cg00872532 | chr2 | Open Sea    | 0.621773642 | 0.915254514 | 0.2934809 | 3.41E-05 |
| cg08162976 | chr2 | Open Sea    | 0.590799101 | 0.88409592  | 0.2932968 | 4.66E-06 |
| cg16721427 | chr2 | Island      | 0.565404826 | 0.857894184 | 0.2924894 | 0.003332 |
| cg03128029 | chr2 | Open Sea    | 0.521739468 | 0.813563982 | 0.2918245 | 0.012384 |
| cg20951650 | chr2 | Open Sea    | 0.624599959 | 0.915907324 | 0.2913074 | 7.56E-06 |
| cg25406923 | chr2 | South Shelf | 0.50058701  | 0.791185356 | 0.2905983 | 0.000262 |
| cg27272487 | chr2 | Open Sea    | 0.636702251 | 0.926887061 | 0.2901848 | 0.000129 |
| cg19006220 | chr2 | Island      | 0.635918014 | 0.926067792 | 0.2901498 | 8.8E-06  |
| cg04546573 | chr2 | Open Sea    | 0.301461885 | 0.589822419 | 0.2883605 | 0.041354 |
| cg09281979 | chr2 | North Shore | 0.4862414   | 0.773775819 | 0.2875344 | 6.49E-05 |
| cg08722695 | chr2 | South Shelf | 0.571142973 | 0.858124776 | 0.2869818 | 0.023331 |
| cg17011953 | chr2 | Open Sea    | 0.469973496 | 0.756569505 | 0.286596  | 1.62E-05 |
| cg07096238 | chr2 | Open Sea    | 0.487014652 | 0.773230309 | 0.2862157 | 0.000288 |
| cg19702194 | chr2 | Open Sea    | 0.613531479 | 0.89898686  | 0.2854554 | 2.18E-05 |
| cg16616765 | chr2 | North Shore | 0.626268094 | 0.911373674 | 0.2851056 | 1.14E-05 |
| cg14782266 | chr2 | Open Sea    | 0.622925747 | 0.90766246  | 0.2847367 | 3.65E-08 |
| cg11732925 | chr2 | Open Sea    | 0.512194174 | 0.796409439 | 0.2842153 | 0.049619 |
| cg05208056 | chr2 | Open Sea    | 0.637275821 | 0.921310623 | 0.2840348 | 4.83E-05 |
| cg18183892 | chr2 | Open Sea    | 0.483121074 | 0.766910508 | 0.2837894 | 0.000108 |
| cg09837245 | chr2 | Open Sea    | 0.627022785 | 0.910607535 | 0.2835848 | 5.85E-05 |
| cg05973555 | chr2 | Open Sea    | 0.517865457 | 0.801422247 | 0.2835568 | 0.000735 |
| cg25806932 | chr2 | South Shore | 0.280210217 | 0.563636434 | 0.2834262 | 0.000171 |
| cg12594648 | chr2 | Open Sea    | 0.468840853 | 0.751856204 | 0.2830154 | 0.002744 |
| cg22980483 | chr2 | Open Sea    | 0.4992845   | 0.782253643 | 0.2829691 | 0.001004 |
| cg13024761 | chr2 | Open Sea    | 0.589519653 | 0.871938972 | 0.2824193 | 3.08E-06 |
| cg12511356 | chr2 | Open Sea    | 0.589230577 | 0.870530073 | 0.2812995 | 4.3E-06  |
| cg00543073 | chr2 | North Shelf | 0.316698771 | 0.59676237  | 0.2800636 | 0.036246 |
| cg14019348 | chr2 | Open Sea    | 0.606402213 | 0.886390801 | 0.2799886 | 0.001835 |
| cg02952635 | chr2 | Open Sea    | 0.522302229 | 0.801699943 | 0.2793977 | 0.042117 |
| cg02561693 | chr2 | Open Sea    | 0.508381528 | 0.787657168 | 0.2792756 | 9.74E-08 |
| cg24519867 | chr2 | Open Sea    | 0.635503441 | 0.914145486 | 0.278642  | 5.73E-05 |
| cg10966876 | chr2 | Island      | 0.237442181 | 0.515655804 | 0.2782136 | 0.032577 |
| cg06974672 | chr2 | Open Sea    | 0.56671978  | 0.844431186 | 0.2777114 | 0.034994 |

|            |      |             |             |             |           |          |
|------------|------|-------------|-------------|-------------|-----------|----------|
| cg24618169 | chr2 | Open Sea    | 0.573585593 | 0.850826949 | 0.2772414 | 7.43E-05 |
| cg00822666 | chr2 | Open Sea    | 0.621345284 | 0.898355427 | 0.2770101 | 5.6E-05  |
| cg13725590 | chr2 | North Shore | 0.545571355 | 0.822342195 | 0.2767708 | 0.000133 |
| cg15146122 | chr2 | Open Sea    | 0.522195496 | 0.798639745 | 0.2764442 | 0.011599 |
| cg07930673 | chr2 | North Shelf | 0.552723682 | 0.828765044 | 0.2760414 | 0.000342 |
| cg16794961 | chr2 | Open Sea    | 0.576400452 | 0.852406355 | 0.2760059 | 0.002048 |
| cg23612570 | chr2 | North Shelf | 0.486081902 | 0.761846426 | 0.2757645 | 0.01627  |
| cg00451388 | chr2 | North Shore | 0.548006372 | 0.823764637 | 0.2757583 | 6.01E-05 |
| cg22237707 | chr2 | Open Sea    | 0.611454362 | 0.887097083 | 0.2756427 | 1.52E-06 |
| cg06493695 | chr2 | Open Sea    | 0.65073992  | 0.926235646 | 0.2754957 | 2.39E-07 |
| cg24594459 | chr2 | Open Sea    | 0.397906351 | 0.673217065 | 0.2753107 | 0.025909 |
| cg13481776 | chr2 | North Shelf | 0.544452122 | 0.819537847 | 0.2750857 | 3.69E-06 |
| cg14674802 | chr2 | South Shore | 0.456848433 | 0.731795276 | 0.2749468 | 0.016172 |
| cg25000021 | chr2 | Open Sea    | 0.623206876 | 0.897776234 | 0.2745694 | 5.98E-05 |
| cg21540530 | chr2 | Open Sea    | 0.374666674 | 0.648965249 | 0.2742986 | 0.02802  |
| cg03032798 | chr2 | Open Sea    | 0.391345898 | 0.665477213 | 0.2741313 | 0.0174   |
| cg02557922 | chr2 | Open Sea    | 0.496775567 | 0.770690446 | 0.2739149 | 7.82E-07 |
| cg06544882 | chr2 | Open Sea    | 0.523302874 | 0.797043386 | 0.2737405 | 0.029674 |
| cg10917619 | chr2 | South Shore | 0.433800394 | 0.706448712 | 0.2726483 | 0.011069 |
| cg08989942 | chr2 | Open Sea    | 0.553041375 | 0.825592303 | 0.2725509 | 0.000224 |
| cg27091865 | chr2 | Open Sea    | 0.395801619 | 0.667964735 | 0.2721631 | 0.022481 |
| cg23649280 | chr2 | Open Sea    | 0.489055313 | 0.760706204 | 0.2716509 | 0.00511  |
| cg22681709 | chr2 | Open Sea    | 0.427655318 | 0.698712027 | 0.2710567 | 0.00211  |
| cg07218647 | chr2 | South Shelf | 0.50836633  | 0.779193405 | 0.2708271 | 0.043966 |
| cg19020434 | chr2 | South Shelf | 0.576234845 | 0.847018482 | 0.2707836 | 0.012059 |
| cg05256276 | chr2 | Open Sea    | 0.657921271 | 0.928519394 | 0.2705981 | 9.61E-06 |
| cg13025359 | chr2 | Open Sea    | 0.554327661 | 0.8238202   | 0.2694925 | 0.009111 |
| cg00094744 | chr2 | North Shelf | 0.335024678 | 0.604489655 | 0.269465  | 0.007265 |
| cg21315873 | chr2 | South Shelf | 0.611437551 | 0.880758256 | 0.2693207 | 2.49E-05 |
| cg07469838 | chr2 | Open Sea    | 0.598895385 | 0.868148149 | 0.2692528 | 0.008328 |
| cg12001457 | chr2 | Open Sea    | 0.546449758 | 0.815560778 | 0.269111  | 1.46E-05 |
| cg18542495 | chr2 | Open Sea    | 0.310216809 | 0.579300104 | 0.2690833 | 9.6E-08  |
| cg19302979 | chr2 | Open Sea    | 0.479392211 | 0.74822178  | 0.2688296 | 0.028121 |
| cg06625640 | chr2 | North Shelf | 0.24879019  | 0.517386233 | 0.268596  | 0.005323 |
| cg20314918 | chr2 | Open Sea    | 0.443623736 | 0.71187599  | 0.2682523 | 0.015596 |
| cg00775863 | chr2 | Open Sea    | 0.314756899 | 0.582920745 | 0.2681638 | 0.000554 |
| cg22512663 | chr2 | North Shelf | 0.603193745 | 0.870777002 | 0.2675833 | 1.28E-05 |
| cg21844291 | chr2 | North Shelf | 0.584734579 | 0.852297892 | 0.2675633 | 0.043477 |
| cg17021949 | chr2 | Open Sea    | 0.617350536 | 0.884907232 | 0.2675567 | 0.009368 |
| cg17297613 | chr2 | Open Sea    | 0.631991761 | 0.899313707 | 0.2673219 | 6.31E-07 |
| cg25947773 | chr2 | Open Sea    | 0.578392516 | 0.845418411 | 0.2670259 | 0.003728 |
| cg26680793 | chr2 | Open Sea    | 0.679342533 | 0.944051137 | 0.2647086 | 6.86E-05 |
| cg01272790 | chr2 | Open Sea    | 0.640947703 | 0.905565113 | 0.2646174 | 6.07E-06 |
| cg03998495 | chr2 | Open Sea    | 0.531527386 | 0.796133254 | 0.2646059 | 0.000943 |
| cg15746445 | chr2 | Open Sea    | 0.426948472 | 0.690126602 | 0.2631781 | 0.003542 |
| cg22864617 | chr2 | Open Sea    | 0.504698977 | 0.767000055 | 0.2623011 | 0.01297  |
| cg14144469 | chr2 | North Shore | 0.628285486 | 0.890389185 | 0.2621037 | 2.5E-05  |
| cg17293838 | chr2 | North Shelf | 0.586538157 | 0.847700495 | 0.2611623 | 0.001161 |
| cg08449164 | chr2 | North Shore | 0.469485295 | 0.730096362 | 0.2606111 | 0.03629  |
| cg21686287 | chr2 | Open Sea    | 0.603579488 | 0.863678416 | 0.2600989 | 4.93E-05 |



|            |      |             |             |             |           |          |
|------------|------|-------------|-------------|-------------|-----------|----------|
| cg09062961 | chr2 | Open Sea    | 0.662813076 | 0.922767095 | 0.259954  | 9.32E-05 |
| cg20611039 | chr2 | Open Sea    | 0.561041414 | 0.820960803 | 0.2599194 | 0.003916 |
| cg06808305 | chr2 | North Shore | 0.519711364 | 0.779176043 | 0.2594647 | 0.041519 |
| cg10628035 | chr2 | Open Sea    | 0.534385499 | 0.793568162 | 0.2591827 | 0.002006 |
| cg22885000 | chr2 | Open Sea    | 0.531671491 | 0.79061901  | 0.2589475 | 0.003636 |
| cg11376339 | chr2 | Open Sea    | 0.513382097 | 0.772171302 | 0.2587892 | 0.022871 |
| cg27004195 | chr2 | Open Sea    | 0.518201    | 0.776929556 | 0.2587286 | 0.033495 |
| cg23302945 | chr2 | Open Sea    | 0.54927717  | 0.807965721 | 0.2586886 | 0.01368  |
| cg20841588 | chr2 | Open Sea    | 0.504995114 | 0.763623015 | 0.2586279 | 0.000232 |
| cg09701582 | chr2 | South Shore | 0.582883776 | 0.841508468 | 0.2586247 | 0.006821 |
| cg15301057 | chr2 | Open Sea    | 0.64582272  | 0.903608355 | 0.2577856 | 9.3E-06  |
| cg20872072 | chr2 | South Shelf | 0.510082047 | 0.767683896 | 0.2576018 | 0.004842 |
| cg08189280 | chr2 | South Shelf | 0.644925015 | 0.901634353 | 0.2567093 | 0.00013  |
| cg12250807 | chr2 | Open Sea    | 0.588579103 | 0.845261183 | 0.2566821 | 0.047629 |
| cg08034990 | chr2 | Open Sea    | 0.573430658 | 0.829933609 | 0.256503  | 0.00013  |
| cg13378563 | chr2 | Open Sea    | 0.660968006 | 0.917031024 | 0.256063  | 2.87E-05 |
| cg06574769 | chr2 | Island      | 0.620404672 | 0.875958914 | 0.2555542 | 0.000335 |
| cg00579706 | chr2 | North Shore | 0.476719692 | 0.732119593 | 0.2553999 | 2.22E-05 |
| cg04315554 | chr2 | Open Sea    | 0.426076646 | 0.679045384 | 0.2529687 | 0.007949 |
| cg03377767 | chr2 | Open Sea    | 0.3693494   | 0.622293289 | 0.2529439 | 0.044721 |
| cg27226238 | chr2 | Open Sea    | 0.628156758 | 0.880758282 | 0.2526015 | 0.000133 |
| cg26118675 | chr2 | Open Sea    | 0.572517023 | 0.825010855 | 0.2524938 | 2.39E-05 |
| cg14446494 | chr2 | North Shore | 0.555825321 | 0.808152473 | 0.2523272 | 0.036925 |
| cg06621431 | chr2 | Open Sea    | 0.663274774 | 0.915581879 | 0.2523071 | 0.000171 |
| cg24216893 | chr2 | Open Sea    | 0.597774577 | 0.849049044 | 0.2512745 | 0.002505 |
| cg10766866 | chr2 | Open Sea    | 0.558297594 | 0.809280117 | 0.2509825 | 8.38E-05 |
| cg03263123 | chr2 | Open Sea    | 0.57330905  | 0.824246445 | 0.2509374 | 0.006981 |
| cg27361577 | chr2 | North Shore | 0.403166466 | 0.653758594 | 0.2505921 | 0.038865 |
| cg02066476 | chr2 | Open Sea    | 0.603529402 | 0.85377112  | 0.2502417 | 0.000448 |
| cg20485058 | chr2 | Open Sea    | 0.602736299 | 0.852859475 | 0.2501232 | 0.044698 |
| cg15741855 | chr2 | Open Sea    | 0.599303667 | 0.849084991 | 0.2497813 | 0.000208 |
| cg21349914 | chr2 | Open Sea    | 0.639383967 | 0.888969428 | 0.2495855 | 0.001437 |
| cg21595092 | chr2 | Open Sea    | 0.489968428 | 0.739145188 | 0.2491768 | 0.002591 |
| cg18446140 | chr2 | Open Sea    | 0.575311995 | 0.824413416 | 0.2491014 | 0.000671 |
| cg22948077 | chr2 | North Shore | 0.639473363 | 0.888349385 | 0.248876  | 0.006554 |
| cg00724015 | chr2 | Open Sea    | 0.460716524 | 0.708408765 | 0.2476922 | 2.43E-05 |
| cg19705853 | chr2 | South Shelf | 0.587347844 | 0.835029327 | 0.2476815 | 7.45E-05 |
| cg02069095 | chr2 | North Shelf | 0.526544535 | 0.773985757 | 0.2474412 | 0.000311 |
| cg20495418 | chr2 | North Shelf | 0.631631575 | 0.879058327 | 0.2474268 | 0.000685 |
| cg19995899 | chr2 | Open Sea    | 0.574069477 | 0.821301793 | 0.2472323 | 0.019523 |
| cg10187167 | chr2 | Open Sea    | 0.600679202 | 0.847330214 | 0.246651  | 3.86E-05 |
| cg15851696 | chr2 | Open Sea    | 0.563541601 | 0.810099435 | 0.2465578 | 5.01E-05 |
| cg18330370 | chr2 | Open Sea    | 0.51780987  | 0.763837789 | 0.2460279 | 1.24E-07 |
| cg02674324 | chr2 | North Shore | 0.614499387 | 0.859874122 | 0.2453747 | 0.000335 |
| cg26828767 | chr2 | Open Sea    | 0.649772593 | 0.894629591 | 0.244857  | 6.36E-06 |
| cg09389557 | chr2 | Open Sea    | 0.626642713 | 0.871358197 | 0.2447155 | 0.005084 |
| cg08998212 | chr2 | South Shore | 0.315470116 | 0.559902576 | 0.2444325 | 2.09E-06 |
| cg08286791 | chr2 | Open Sea    | 0.543118819 | 0.786805977 | 0.2436872 | 0.043543 |
| cg25798782 | chr2 | South Shore | 0.593329407 | 0.836768002 | 0.2434386 | 0.034761 |
| cg17730764 | chr2 | Open Sea    | 0.562033355 | 0.805364814 | 0.2433315 | 9.62E-05 |

|            |      |             |             |             |           |          |
|------------|------|-------------|-------------|-------------|-----------|----------|
| cg04802018 | chr2 | Open Sea    | 0.455432312 | 0.698713826 | 0.2432815 | 0.004398 |
| cg00672093 | chr2 | Open Sea    | 0.549478031 | 0.792376015 | 0.242898  | 4.56E-05 |
| cg07262519 | chr2 | Open Sea    | 0.665254305 | 0.90810237  | 0.2428481 | 5.82E-06 |
| cg04741366 | chr2 | Open Sea    | 0.659610435 | 0.901905493 | 0.2422951 | 9.7E-05  |
| cg10075506 | chr2 | Open Sea    | 0.667035006 | 0.909252996 | 0.242218  | 0.000749 |
| cg24925163 | chr2 | North Shore | 0.404274237 | 0.646487177 | 0.2422129 | 0.000515 |
| cg04788769 | chr2 | North Shelf | 0.696069929 | 0.938039632 | 0.2419697 | 0.000105 |
| cg11915812 | chr2 | Open Sea    | 0.518207347 | 0.760090931 | 0.2418836 | 0.029736 |
| cg09360931 | chr2 | Open Sea    | 0.665996124 | 0.907757326 | 0.2417612 | 0.000199 |
| cg01147467 | chr2 | North Shelf | 0.624774544 | 0.866066071 | 0.2412915 | 0.000634 |
| cg26000807 | chr2 | Open Sea    | 0.504164839 | 0.745416598 | 0.2412518 | 9.1E-05  |
| cg09675299 | chr2 | Open Sea    | 0.509077007 | 0.750231875 | 0.2411549 | 0.000314 |
| cg18538751 | chr2 | Open Sea    | 0.484947596 | 0.725938441 | 0.2409908 | 0.005261 |
| cg26040244 | chr2 | Open Sea    | 0.604121697 | 0.84510242  | 0.2409807 | 0.003163 |
| cg17010895 | chr2 | Open Sea    | 0.455989166 | 0.696695537 | 0.2407064 | 0.048983 |
| cg08717402 | chr2 | Open Sea    | 0.524894866 | 0.765114325 | 0.2402195 | 0.002258 |
| cg17365725 | chr2 | Open Sea    | 0.498216441 | 0.738222564 | 0.2400061 | 0.02523  |
| cg16509592 | chr2 | Open Sea    | 0.635382401 | 0.875338899 | 0.2399565 | 0.000264 |
| cg00397714 | chr2 | Open Sea    | 0.61145501  | 0.851344291 | 0.2398893 | 0.000127 |
| cg04735632 | chr2 | South Shore | 0.566289158 | 0.805818888 | 0.2395297 | 0.02091  |
| cg15343463 | chr2 | Open Sea    | 0.67842875  | 0.917088647 | 0.2386599 | 4.92E-06 |
| cg19578183 | chr2 | South Shore | 0.361777612 | 0.600239421 | 0.2384618 | 0.020051 |
| cg05986623 | chr2 | Open Sea    | 0.592269363 | 0.830640643 | 0.2383713 | 0.003946 |
| cg07412254 | chr2 | Open Sea    | 0.663944918 | 0.902027628 | 0.2380827 | 0.000223 |
| cg01116956 | chr2 | North Shore | 0.445199376 | 0.683276166 | 0.2380768 | 0.000386 |
| cg13880193 | chr2 | Open Sea    | 0.584404569 | 0.822466602 | 0.238062  | 0.001425 |
| cg00669330 | chr2 | South Shelf | 0.517609163 | 0.755027986 | 0.2374188 | 0.00593  |
| cg26647242 | chr2 | Open Sea    | 0.58336483  | 0.820780472 | 0.2374156 | 0.010787 |
| cg22129276 | chr2 | Open Sea    | 0.353018748 | 0.589558316 | 0.2365396 | 0.014212 |
| cg12603369 | chr2 | Open Sea    | 0.585426836 | 0.821889088 | 0.2364623 | 0.044721 |
| cg07203767 | chr2 | Open Sea    | 0.635544667 | 0.871609814 | 0.2360651 | 0.007391 |
| cg18361425 | chr2 | Open Sea    | 0.587394997 | 0.823437713 | 0.2360427 | 0.025387 |
| cg10081941 | chr2 | Open Sea    | 0.642660657 | 0.8787032   | 0.2360425 | 0.018816 |
| cg24545125 | chr2 | Open Sea    | 0.658603973 | 0.894299439 | 0.2356955 | 0.035563 |
| cg21759048 | chr2 | Open Sea    | 0.647850287 | 0.88327732  | 0.235427  | 0.000184 |
| cg18712919 | chr2 | North Shore | 0.534518297 | 0.769770248 | 0.235252  | 0.00027  |
| cg11143092 | chr2 | North Shelf | 0.479380641 | 0.714458918 | 0.2350783 | 0.040675 |
| cg12252328 | chr2 | Open Sea    | 0.549524579 | 0.784474549 | 0.23495   | 0.00161  |
| cg26476630 | chr2 | Open Sea    | 0.602715723 | 0.837433842 | 0.2347181 | 0.011746 |
| cg26881591 | chr2 | Open Sea    | 0.660571545 | 0.894977444 | 0.2344059 | 7.6E-05  |
| cg10759158 | chr2 | Open Sea    | 0.584115732 | 0.81842667  | 0.2343109 | 0.020866 |
| cg01414185 | chr2 | Island      | 0.315115355 | 0.549049023 | 0.2339337 | 0.00013  |
| cg21856680 | chr2 | South Shelf | 0.636671923 | 0.870135727 | 0.2334638 | 3.86E-05 |
| cg11132534 | chr2 | Open Sea    | 0.639408626 | 0.872565887 | 0.2331573 | 0.000748 |
| cg23490246 | chr2 | Open Sea    | 0.364667491 | 0.597467428 | 0.2327999 | 7.06E-05 |
| cg02473287 | chr2 | Open Sea    | 0.668070557 | 0.90016001  | 0.2320895 | 0.03779  |
| cg00682069 | chr2 | North Shelf | 0.607820418 | 0.839878335 | 0.2320579 | 0.012341 |
| cg09761705 | chr2 | Open Sea    | 0.685211523 | 0.917207257 | 0.2319957 | 0.003129 |
| cg23720898 | chr2 | Open Sea    | 0.602191246 | 0.834114606 | 0.2319234 | 0.014471 |
| cg25538881 | chr2 | Open Sea    | 0.617701153 | 0.849307427 | 0.2316063 | 0.003395 |

|            |      |             |             |             |           |          |
|------------|------|-------------|-------------|-------------|-----------|----------|
| cg04554613 | chr2 | Open Sea    | 0.49767036  | 0.729124344 | 0.231454  | 0.048697 |
| cg03893913 | chr2 | Open Sea    | 0.652501931 | 0.883928609 | 0.2314267 | 0.014098 |
| cg01966334 | chr2 | North Shelf | 0.433364096 | 0.664769724 | 0.2314056 | 0.017224 |
| cg16582792 | chr2 | Open Sea    | 0.558108091 | 0.789037941 | 0.2309299 | 0.001089 |
| cg00007426 | chr2 | Open Sea    | 0.684289739 | 0.914664969 | 0.2303752 | 0.002081 |
| cg03333621 | chr2 | Island      | 0.654099985 | 0.884400557 | 0.2303006 | 0.000708 |
| cg05113410 | chr2 | Open Sea    | 0.618292457 | 0.848356285 | 0.2300638 | 0.009912 |
| cg10994870 | chr2 | Island      | 0.646379894 | 0.876323481 | 0.2299436 | 1.55E-05 |
| cg11513884 | chr2 | Open Sea    | 0.429270564 | 0.65920367  | 0.2299331 | 0.008022 |
| cg27587952 | chr2 | South Shelf | 0.482405394 | 0.712249586 | 0.2298442 | 0.013555 |
| cg13491317 | chr2 | North Shelf | 0.59359913  | 0.82326517  | 0.229666  | 0.000751 |
| cg07837078 | chr2 | Open Sea    | 0.622238899 | 0.851636371 | 0.2293975 | 1.89E-05 |
| cg18990303 | chr2 | Island      | 0.689364007 | 0.918752522 | 0.2293885 | 7.46E-06 |
| cg08267591 | chr2 | North Shelf | 0.599444134 | 0.828687517 | 0.2292434 | 0.00016  |
| cg01695225 | chr2 | South Shore | 0.145446936 | 0.374664477 | 0.2292175 | 0.041103 |
| cg09759432 | chr2 | South Shelf | 0.639311049 | 0.868429625 | 0.2291186 | 8.09E-05 |
| cg12747584 | chr2 | Open Sea    | 0.49740198  | 0.726493031 | 0.2290911 | 0.007953 |
| cg20313856 | chr2 | North Shelf | 0.661892999 | 0.890660331 | 0.2287673 | 0.000241 |
| cg23902076 | chr2 | Open Sea    | 0.488553792 | 0.717233648 | 0.2286799 | 0.049558 |
| cg24215159 | chr2 | Island      | 0.625506002 | 0.854085002 | 0.228579  | 0.002937 |
| cg24375470 | chr2 | Open Sea    | 0.59146491  | 0.820022616 | 0.2285577 | 0.000287 |
| cg22538712 | chr2 | Open Sea    | 0.659369616 | 0.887878509 | 0.2285089 | 3E-05    |
| cg10413688 | chr2 | South Shelf | 0.608168268 | 0.835933715 | 0.2277654 | 0.048611 |
| cg01897036 | chr2 | South Shore | 0.618168359 | 0.845425192 | 0.2272568 | 0.025725 |
| cg24083720 | chr2 | Open Sea    | 0.66147252  | 0.888724937 | 0.2272524 | 3.61E-05 |
| cg25296103 | chr2 | Open Sea    | 0.335261054 | 0.562393672 | 0.2271326 | 0.004616 |
| cg22075362 | chr2 | Open Sea    | 0.581255156 | 0.808082163 | 0.226827  | 0.001806 |
| cg05978707 | chr2 | Open Sea    | 0.621760265 | 0.84845672  | 0.2266965 | 0.00409  |
| cg05049825 | chr2 | Open Sea    | 0.618855876 | 0.845315616 | 0.2264597 | 0.041288 |
| cg05907034 | chr2 | Open Sea    | 0.554404997 | 0.780843071 | 0.2264381 | 0.048326 |
| cg01173650 | chr2 | Open Sea    | 0.556119418 | 0.782416814 | 0.2262974 | 0.005378 |
| cg13712012 | chr2 | Open Sea    | 0.645075093 | 0.871196943 | 0.2261219 | 0.001537 |
| cg26313421 | chr2 | Open Sea    | 0.672283723 | 0.898338404 | 0.2260547 | 0.00019  |
| cg22437586 | chr2 | Open Sea    | 0.403112332 | 0.629003378 | 0.225891  | 0.007581 |
| cg03030419 | chr2 | Open Sea    | 0.520728501 | 0.746348921 | 0.2256204 | 0.001828 |
| cg25734624 | chr2 | Open Sea    | 0.685539847 | 0.911141774 | 0.2256019 | 0.000104 |
| cg19411699 | chr2 | Open Sea    | 0.596208574 | 0.821538108 | 0.2253295 | 0.002272 |
| cg25786136 | chr2 | Open Sea    | 0.668514741 | 0.89354079  | 0.225026  | 7.4E-05  |
| cg18147278 | chr2 | North Shelf | 0.478384674 | 0.703240294 | 0.2248556 | 0.000231 |
| cg17870569 | chr2 | North Shelf | 0.46291673  | 0.687769835 | 0.2248531 | 0.001708 |
| cg18968409 | chr2 | Open Sea    | 0.277444001 | 0.501544864 | 0.2241009 | 0.012803 |
| cg24522085 | chr2 | Open Sea    | 0.619321715 | 0.842952342 | 0.2236306 | 0.000123 |
| cg17531776 | chr2 | North Shore | 0.675217463 | 0.898683842 | 0.2234664 | 0.000804 |
| cg13973727 | chr2 | Open Sea    | 0.563221084 | 0.786610787 | 0.2233897 | 0.001145 |
| cg21670983 | chr2 | North Shore | 0.590626212 | 0.813786016 | 0.2231598 | 0.00232  |
| cg03286742 | chr2 | Open Sea    | 0.660283391 | 0.882652823 | 0.2223694 | 0.001304 |
| cg09449104 | chr2 | South Shelf | 0.688355464 | 0.910089488 | 0.221734  | 0.00039  |
| cg02462081 | chr2 | North Shore | 0.690769121 | 0.912243172 | 0.2214741 | 7.45E-06 |
| cg13758186 | chr2 | Open Sea    | 0.353823544 | 0.574696923 | 0.2208734 | 0.023073 |
| cg16354502 | chr2 | South Shelf | 0.613696706 | 0.833756139 | 0.2200594 | 0.000262 |

|            |      |             |             |             |           |          |
|------------|------|-------------|-------------|-------------|-----------|----------|
| cg15660807 | chr2 | South Shelf | 0.363649858 | 0.583674861 | 0.220025  | 0.000376 |
| cg00685853 | chr2 | North Shore | 0.691155753 | 0.910858164 | 0.2197024 | 0.000145 |
| cg19411272 | chr2 | Open Sea    | 0.571532312 | 0.790807952 | 0.2192756 | 9.5E-05  |
| cg04589521 | chr2 | South Shore | 0.682806166 | 0.902019864 | 0.2192137 | 0.000327 |
| cg06697522 | chr2 | Island      | 0.622274608 | 0.841486781 | 0.2192122 | 0.031873 |
| cg03305746 | chr2 | Open Sea    | 0.625609402 | 0.844811553 | 0.2192022 | 0.003987 |
| cg02798394 | chr2 | Open Sea    | 0.534859424 | 0.753729017 | 0.2188696 | 0.004173 |
| cg06702600 | chr2 | Open Sea    | 0.623734378 | 0.842536315 | 0.2188019 | 0.029324 |
| cg11418389 | chr2 | Open Sea    | 0.630976989 | 0.84976326  | 0.2187863 | 0.003067 |
| cg05075562 | chr2 | Open Sea    | 0.661121002 | 0.879039127 | 0.2179181 | 0.030626 |
| cg23367089 | chr2 | North Shelf | 0.688199576 | 0.905956682 | 0.2177571 | 0.000868 |
| cg04013994 | chr2 | Open Sea    | 0.589478336 | 0.80714822  | 0.2176699 | 0.001595 |
| cg17588294 | chr2 | Open Sea    | 0.464401206 | 0.682024321 | 0.2176231 | 0.000146 |
| cg14399440 | chr2 | Open Sea    | 0.696146639 | 0.913660887 | 0.2175142 | 0.000259 |
| cg05070608 | chr2 | North Shore | 0.630797394 | 0.848217369 | 0.21742   | 0.00094  |
| cg17280514 | chr2 | North Shore | 0.398377935 | 0.615689311 | 0.2173114 | 0.021316 |
| cg14992768 | chr2 | Open Sea    | 0.555485353 | 0.772533866 | 0.2170485 | 0.000235 |
| cg19716702 | chr2 | Open Sea    | 0.548207759 | 0.765027344 | 0.2168196 | 0.00041  |
| cg09489825 | chr2 | South Shelf | 0.667127447 | 0.883909253 | 0.2167818 | 0.013253 |
| cg22415472 | chr2 | North Shore | 0.687578129 | 0.904289083 | 0.216711  | 0.000732 |
| cg24761668 | chr2 | Open Sea    | 0.479642536 | 0.696103946 | 0.2164614 | 0.007559 |
| cg17346345 | chr2 | South Shelf | 0.467718047 | 0.684081678 | 0.2163636 | 0.000133 |
| cg01737003 | chr2 | Open Sea    | 0.694229048 | 0.910453183 | 0.2162241 | 0.000255 |
| cg16089796 | chr2 | South Shore | 0.660923646 | 0.876925549 | 0.2160019 | 0.000165 |
| cg07687899 | chr2 | Open Sea    | 0.702428494 | 0.918196519 | 0.215768  | 0.000901 |
| cg08977702 | chr2 | Open Sea    | 0.687682657 | 0.903395667 | 0.215713  | 0.000549 |
| cg18366249 | chr2 | Open Sea    | 0.687251804 | 0.902508198 | 0.2152564 | 0.000705 |
| cg24737570 | chr2 | Open Sea    | 0.537600382 | 0.752693426 | 0.215093  | 0.003203 |
| cg23902610 | chr2 | Open Sea    | 0.693955403 | 0.908810459 | 0.2148551 | 0.000347 |
| cg16597412 | chr2 | Open Sea    | 0.699128289 | 0.913957533 | 0.2148292 | 0.00086  |
| cg24828304 | chr2 | South Shelf | 0.707666658 | 0.921940371 | 0.2142737 | 0.000873 |
| cg25683575 | chr2 | South Shelf | 0.643253312 | 0.857183746 | 0.2139304 | 0.00861  |
| cg09469079 | chr2 | Open Sea    | 0.554845838 | 0.768666815 | 0.213821  | 0.014293 |
| cg10331500 | chr2 | North Shelf | 0.511385679 | 0.724949317 | 0.2135636 | 0.006916 |
| cg14382249 | chr2 | Open Sea    | 0.666064353 | 0.87942771  | 0.2133634 | 0.015073 |
| cg22242238 | chr2 | Open Sea    | 0.633910402 | 0.846957748 | 0.2130473 | 0.000507 |
| cg11775579 | chr2 | Open Sea    | 0.537894156 | 0.750879036 | 0.2129849 | 0.000904 |
| cg17485141 | chr2 | Open Sea    | 0.662029957 | 0.87497015  | 0.2129402 | 0.00016  |
| cg19958021 | chr2 | South Shelf | 0.654150708 | 0.866975062 | 0.2128244 | 0.009407 |
| cg09887415 | chr2 | Island      | 0.509373899 | 0.721413358 | 0.2120395 | 0.000621 |
| cg11068930 | chr2 | Open Sea    | 0.660959979 | 0.872908566 | 0.2119486 | 0.003342 |
| cg26372498 | chr2 | Open Sea    | 0.568678882 | 0.780165923 | 0.211487  | 0.035807 |
| cg20155196 | chr2 | Open Sea    | 0.702870208 | 0.914205982 | 0.2113358 | 0.000353 |
| cg17933206 | chr2 | Open Sea    | 0.664953193 | 0.875068574 | 0.2101154 | 0.000266 |
| cg04527612 | chr2 | Open Sea    | 0.637273743 | 0.845709333 | 0.2084356 | 0.002667 |
| cg13173536 | chr2 | Open Sea    | 0.63715648  | 0.845327383 | 0.2081709 | 0.032511 |
| cg13419884 | chr2 | Island      | 0.722802002 | 0.930852369 | 0.2080504 | 5.86E-05 |
| cg11655390 | chr2 | South Shelf | 0.641058504 | 0.849017242 | 0.2079587 | 0.008593 |
| cg04239558 | chr2 | Open Sea    | 0.173919435 | 0.381848959 | 0.2079295 | 5.85E-05 |
| cg18530712 | chr2 | Open Sea    | 0.682248947 | 0.889920179 | 0.2076712 | 0.000917 |

|            |       |             |             |             |           |          |
|------------|-------|-------------|-------------|-------------|-----------|----------|
| cg22386774 | chr2  | Open Sea    | 0.595037139 | 0.802577724 | 0.2075406 | 0.01355  |
| cg21165909 | chr2  | Open Sea    | 0.639337999 | 0.846519288 | 0.2071813 | 9.98E-05 |
| cg18586780 | chr2  | South Shore | 0.655753745 | 0.862701902 | 0.2069482 | 0.03222  |
| cg12043508 | chr2  | Open Sea    | 0.630894154 | 0.837760154 | 0.206866  | 0.000997 |
| cg06481517 | chr2  | Open Sea    | 0.403660167 | 0.610259472 | 0.2065993 | 0.028934 |
| cg07988979 | chr2  | Island      | 0.688304582 | 0.894602057 | 0.2062975 | 0.001624 |
| cg15928680 | chr2  | Open Sea    | 0.136314888 | 0.342544336 | 0.2062294 | 0.034075 |
| cg11918073 | chr2  | North Shore | 0.711570341 | 0.917763434 | 0.2061931 | 0.002823 |
| cg10902340 | chr2  | South Shore | 0.694972367 | 0.900893201 | 0.2059208 | 0.00672  |
| cg06573398 | chr2  | Open Sea    | 0.606001638 | 0.811747075 | 0.2057454 | 0.003402 |
| cg06020182 | chr2  | Open Sea    | 0.70737529  | 0.912593018 | 0.2052177 | 0.003412 |
| cg00787608 | chr2  | Open Sea    | 0.683260917 | 0.888304343 | 0.2050434 | 0.001601 |
| cg23260456 | chr2  | Open Sea    | 0.543796299 | 0.748549389 | 0.2047531 | 0.01174  |
| cg06118116 | chr2  | North Shore | 0.510089766 | 0.714368369 | 0.2042786 | 0.000188 |
| cg07289618 | chr2  | Open Sea    | 0.446994364 | 0.651143649 | 0.2041493 | 0.043427 |
| cg17454298 | chr2  | Open Sea    | 0.692696933 | 0.896666981 | 0.20397   | 0.002173 |
| cg20497304 | chr2  | Open Sea    | 0.653139457 | 0.85697744  | 0.203838  | 0.001941 |
| cg25481636 | chr2  | Open Sea    | 0.714027518 | 0.917860383 | 0.2038329 | 0.00107  |
| cg19795150 | chr2  | Open Sea    | 0.614374773 | 0.818069595 | 0.2036948 | 0.044723 |
| cg05403347 | chr2  | Open Sea    | 0.66716467  | 0.870681453 | 0.2035168 | 0.00013  |
| cg15703357 | chr2  | North Shelf | 0.638968258 | 0.841727653 | 0.2027594 | 0.025907 |
| cg14508405 | chr2  | Open Sea    | 0.613687011 | 0.816222616 | 0.2025356 | 0.008287 |
| cg02468821 | chr2  | Open Sea    | 0.701074869 | 0.903428909 | 0.202354  | 0.022694 |
| cg07088935 | chr2  | Open Sea    | 0.722531739 | 0.92452062  | 0.2019889 | 0.000616 |
| cg23325313 | chr2  | North Shore | 0.719646623 | 0.921611911 | 0.2019653 | 0.001705 |
| cg01150918 | chr2  | South Shelf | 0.318226686 | 0.520113123 | 0.2018864 | 9.92E-05 |
| cg03281426 | chr2  | North Shore | 0.69119912  | 0.892342689 | 0.2011436 | 0.003238 |
| cg25614596 | chr2  | South Shore | 0.596382011 | 0.797210467 | 0.2008285 | 0.010718 |
| cg25446017 | chr2  | North Shelf | 0.559740573 | 0.760527448 | 0.2007869 | 4.85E-07 |
| cg13158199 | chr2  | Open Sea    | 0.645321563 | 0.846081497 | 0.2007599 | 0.037143 |
| cg15681466 | chr2  | Open Sea    | 0.70958947  | 0.909931928 | 0.2003425 | 0.009565 |
| cg00095431 | chr2  | Open Sea    | 0.553889163 | 0.75396697  | 0.2000778 | 0.00327  |
| cg07795968 | chr20 | Open Sea    | 0.324568983 | 0.758211014 | 0.433642  | 0.008479 |
| cg15449979 | chr20 | South Shelf | 0.374642247 | 0.802287199 | 0.427645  | 1.5E-09  |
| cg05177629 | chr20 | Open Sea    | 0.28073326  | 0.678334163 | 0.3976009 | 0.023357 |
| cg20299254 | chr20 | North Shore | 0.491257629 | 0.860728982 | 0.3694714 | 0.010791 |
| cg02311163 | chr20 | Open Sea    | 0.541785753 | 0.910109801 | 0.368324  | 9.86E-08 |
| cg23466118 | chr20 | Open Sea    | 0.567409568 | 0.924788378 | 0.3573788 | 0.001101 |
| cg02668218 | chr20 | South Shelf | 0.509540367 | 0.858451285 | 0.3489109 | 9.03E-07 |
| cg19378216 | chr20 | Open Sea    | 0.456407961 | 0.80332682  | 0.3469189 | 0.002066 |
| cg02775867 | chr20 | North Shore | 0.472399694 | 0.797139425 | 0.3247397 | 0.012844 |
| cg08330217 | chr20 | South Shelf | 0.541408177 | 0.864015777 | 0.3226076 | 1.27E-05 |
| cg11274778 | chr20 | Open Sea    | 0.48488494  | 0.805724217 | 0.3208393 | 0.000511 |
| cg25188760 | chr20 | South Shelf | 0.522457728 | 0.83840049  | 0.3159428 | 2.92E-05 |
| cg14143580 | chr20 | Open Sea    | 0.485882424 | 0.80086937  | 0.3149869 | 8.73E-06 |
| cg22255095 | chr20 | South Shore | 0.478361445 | 0.791403509 | 0.3130421 | 0.002445 |
| cg16121136 | chr20 | Open Sea    | 0.502754324 | 0.815297838 | 0.3125435 | 0.000439 |
| cg07833342 | chr20 | Open Sea    | 0.530264813 | 0.83874301  | 0.3084782 | 3.12E-06 |
| cg18787420 | chr20 | North Shore | 0.315273707 | 0.620067    | 0.3047933 | 0.046635 |
| cg01279413 | chr20 | North Shore | 0.251429871 | 0.551507934 | 0.3000781 | 0.046329 |

|            |       |             |             |             |           |          |
|------------|-------|-------------|-------------|-------------|-----------|----------|
| cg08482501 | chr20 | Island      | 0.530478714 | 0.829560167 | 0.2990815 | 4.53E-06 |
| cg16162122 | chr20 | North Shelf | 0.510243631 | 0.806034042 | 0.2957904 | 0.049124 |
| cg24866792 | chr20 | Open Sea    | 0.321686602 | 0.615940584 | 0.294254  | 0.000914 |
| cg01722584 | chr20 | Open Sea    | 0.560951741 | 0.850768629 | 0.2898169 | 7.47E-05 |
| cg01671881 | chr20 | Open Sea    | 0.490208074 | 0.779011043 | 0.288803  | 6.58E-05 |
| cg15280757 | chr20 | South Shelf | 0.593049755 | 0.87913705  | 0.2860873 | 0.009127 |
| cg09110922 | chr20 | Open Sea    | 0.523303599 | 0.807519155 | 0.2842156 | 3.53E-07 |
| cg07376374 | chr20 | Open Sea    | 0.409663135 | 0.693793354 | 0.2841302 | 8.52E-06 |
| cg10740895 | chr20 | Open Sea    | 0.582433107 | 0.863059181 | 0.2806261 | 0.002138 |
| cg13715798 | chr20 | North Shelf | 0.507813436 | 0.784268919 | 0.2764555 | 1.27E-05 |
| cg24522489 | chr20 | North Shelf | 0.605058769 | 0.880223738 | 0.275165  | 5.81E-05 |
| cg19717150 | chr20 | Open Sea    | 0.485457799 | 0.759165926 | 0.2737081 | 5.93E-05 |
| cg20312687 | chr20 | Open Sea    | 0.561457283 | 0.834969426 | 0.2735121 | 0.017911 |
| cg05269013 | chr20 | South Shelf | 0.454294861 | 0.727627755 | 0.2733329 | 0.003824 |
| cg01479232 | chr20 | Open Sea    | 0.396504562 | 0.669816609 | 0.273312  | 6.52E-06 |
| cg23085846 | chr20 | North Shelf | 0.564414057 | 0.836281553 | 0.2718675 | 0.021043 |
| cg06962867 | chr20 | North Shelf | 0.566300411 | 0.837829481 | 0.2715291 | 7.36E-06 |
| cg04742334 | chr20 | Open Sea    | 0.41071492  | 0.682123599 | 0.2714087 | 4.24E-05 |
| cg22348992 | chr20 | Island      | 0.427212498 | 0.696430492 | 0.269218  | 0.001329 |
| cg24616366 | chr20 | North Shelf | 0.592475951 | 0.861601208 | 0.2691253 | 0.007911 |
| cg06182261 | chr20 | Open Sea    | 0.533784428 | 0.80111245  | 0.267328  | 0.007096 |
| cg03454863 | chr20 | Open Sea    | 0.564041038 | 0.831156967 | 0.2671159 | 1.05E-06 |
| cg25182716 | chr20 | South Shelf | 0.650254179 | 0.917365329 | 0.2671111 | 2.57E-05 |
| cg14727409 | chr20 | Open Sea    | 0.536897869 | 0.802183213 | 0.2652853 | 0.000193 |
| cg22602592 | chr20 | South Shelf | 0.582487281 | 0.847332474 | 0.2648452 | 0.000327 |
| cg23791824 | chr20 | North Shelf | 0.634191028 | 0.89706524  | 0.2628742 | 0.006098 |
| cg10946576 | chr20 | Island      | 0.528329511 | 0.78895547  | 0.260626  | 0.001069 |
| cg26281051 | chr20 | Open Sea    | 0.559994369 | 0.820481645 | 0.2604873 | 0.000256 |
| cg04636876 | chr20 | Open Sea    | 0.482724601 | 0.742108987 | 0.2593844 | 6.37E-05 |
| cg05851042 | chr20 | South Shore | 0.676173443 | 0.935460745 | 0.2592873 | 6.51E-07 |
| cg02811473 | chr20 | North Shelf | 0.632355036 | 0.890974428 | 0.2586194 | 0.000853 |
| cg20485165 | chr20 | Open Sea    | 0.445283363 | 0.703879484 | 0.2585961 | 0.00479  |
| cg04945608 | chr20 | Open Sea    | 0.633314283 | 0.891404115 | 0.2580898 | 1.37E-05 |
| cg14961750 | chr20 | Island      | 0.6428237   | 0.899848695 | 0.257025  | 0.00083  |
| cg01125531 | chr20 | North Shore | 0.649474401 | 0.905057749 | 0.2555833 | 0.000162 |
| cg26821293 | chr20 | South Shore | 0.536592002 | 0.791197381 | 0.2546054 | 0.001024 |
| cg11826008 | chr20 | North Shelf | 0.252659401 | 0.507226448 | 0.254567  | 8.63E-06 |
| cg08117745 | chr20 | North Shelf | 0.61364689  | 0.868199073 | 0.2545522 | 0.00088  |
| cg17814028 | chr20 | North Shelf | 0.50766321  | 0.760858906 | 0.2531957 | 1.13E-05 |
| cg22418307 | chr20 | North Shelf | 0.658037359 | 0.907837195 | 0.2497998 | 0.000128 |
| cg13950362 | chr20 | Open Sea    | 0.430223783 | 0.679570136 | 0.2493464 | 1.98E-05 |
| cg14721506 | chr20 | South Shelf | 0.571324641 | 0.819543674 | 0.248219  | 0.008317 |
| cg13782274 | chr20 | Island      | 0.636706526 | 0.884453684 | 0.2477472 | 0.002542 |
| cg23856293 | chr20 | Open Sea    | 0.651841889 | 0.898670806 | 0.2468289 | 3.33E-05 |
| cg22048683 | chr20 | South Shore | 0.438382287 | 0.684354722 | 0.2459724 | 3.15E-08 |
| cg12680822 | chr20 | Island      | 0.544263517 | 0.789571887 | 0.2453084 | 3.02E-06 |
| cg24758452 | chr20 | North Shelf | 0.470269997 | 0.714194261 | 0.2439243 | 0.001027 |
| cg18323376 | chr20 | Open Sea    | 0.5105302   | 0.754198929 | 0.2436687 | 0.041876 |
| cg01362541 | chr20 | North Shore | 0.502408404 | 0.744112289 | 0.2417039 | 0.000217 |
| cg23997421 | chr20 | Open Sea    | 0.614232952 | 0.85556075  | 0.2413278 | 0.003474 |

|            |       |             |             |             |           |          |
|------------|-------|-------------|-------------|-------------|-----------|----------|
| cg04476891 | chr20 | Open Sea    | 0.412925063 | 0.653186217 | 0.2402612 | 1.12E-05 |
| cg03199996 | chr20 | Open Sea    | 0.374496194 | 0.61278569  | 0.2382895 | 0.008473 |
| cg00159764 | chr20 | North Shore | 0.46103205  | 0.698904428 | 0.2378724 | 8.64E-05 |
| cg21003377 | chr20 | North Shelf | 0.570971416 | 0.808676947 | 0.2377055 | 0.000402 |
| cg02778678 | chr20 | Island      | 0.667131619 | 0.904455152 | 0.2373235 | 0.000104 |
| cg01901706 | chr20 | North Shelf | 0.558298347 | 0.795130774 | 0.2368324 | 0.015074 |
| cg25098585 | chr20 | South Shelf | 0.579002959 | 0.815192778 | 0.2361898 | 0.002182 |
| cg11939450 | chr20 | Open Sea    | 0.629856513 | 0.865154841 | 0.2352983 | 0.000482 |
| cg04742384 | chr20 | North Shelf | 0.507162593 | 0.740880356 | 0.2337178 | 4.77E-06 |
| cg01216882 | chr20 | Open Sea    | 0.522289974 | 0.755485682 | 0.2331957 | 0.013865 |
| cg26478582 | chr20 | Open Sea    | 0.575910844 | 0.807720435 | 0.2318096 | 0.001205 |
| cg20672708 | chr20 | Open Sea    | 0.475141631 | 0.706046681 | 0.230905  | 0.01614  |
| cg11618057 | chr20 | North Shore | 0.527879147 | 0.758698017 | 0.2308189 | 0.000588 |
| cg01105337 | chr20 | North Shore | 0.54183997  | 0.772221175 | 0.2303812 | 0.006186 |
| cg03568039 | chr20 | Open Sea    | 0.685268128 | 0.91548449  | 0.2302164 | 0.000701 |
| cg00334976 | chr20 | Open Sea    | 0.561159645 | 0.791320324 | 0.2301607 | 0.00039  |
| cg08178815 | chr20 | South Shore | 0.680103281 | 0.909336502 | 0.2292332 | 6.86E-05 |
| cg12969998 | chr20 | Open Sea    | 0.416739031 | 0.643031553 | 0.2262925 | 2.95E-05 |
| cg12873919 | chr20 | North Shore | 0.299547215 | 0.525395214 | 0.225848  | 1.11E-05 |
| cg03128590 | chr20 | South Shelf | 0.70906664  | 0.934557877 | 0.2254912 | 6.49E-05 |
| cg01524923 | chr20 | North Shore | 0.612560868 | 0.837723248 | 0.2251624 | 0.020277 |
| cg15667931 | chr20 | South Shore | 0.585653149 | 0.810236553 | 0.2245834 | 7.81E-06 |
| cg03031672 | chr20 | South Shore | 0.521841307 | 0.74595586  | 0.2241146 | 0.010308 |
| cg06338376 | chr20 | Island      | 0.581888822 | 0.805985797 | 0.224097  | 0.00394  |
| cg13890714 | chr20 | Island      | 0.70528353  | 0.92924596  | 0.2239624 | 0.000185 |
| cg03840472 | chr20 | Open Sea    | 0.687384496 | 0.91082394  | 0.2234394 | 0.002477 |
| cg21957191 | chr20 | Open Sea    | 0.564518403 | 0.787897791 | 0.2233794 | 0.000526 |
| cg23711059 | chr20 | South Shore | 0.437059626 | 0.659456738 | 0.2223971 | 0.000814 |
| cg26765743 | chr20 | Open Sea    | 0.627532234 | 0.846816274 | 0.219284  | 0.017414 |
| cg11901715 | chr20 | Open Sea    | 0.444636266 | 0.663610443 | 0.2189742 | 0.014409 |
| cg03352168 | chr20 | Open Sea    | 0.728336433 | 0.945623008 | 0.2172866 | 0.001827 |
| cg20484832 | chr20 | Open Sea    | 0.637871528 | 0.855073952 | 0.2172024 | 0.004969 |
| cg07434253 | chr20 | North Shore | 0.46483343  | 0.681826903 | 0.2169935 | 0.006612 |
| cg15442800 | chr20 | South Shore | 0.632678515 | 0.848559454 | 0.2158809 | 0.000635 |
| cg00153448 | chr20 | South Shelf | 0.399935278 | 0.615448577 | 0.2155133 | 0.027036 |
| cg20920419 | chr20 | South Shore | 0.602362334 | 0.816986565 | 0.2146242 | 0.014031 |
| cg06372145 | chr20 | Open Sea    | 0.509953679 | 0.724158657 | 0.214205  | 0.016076 |
| cg21406518 | chr20 | Open Sea    | 0.613287891 | 0.826847729 | 0.2135598 | 0.010585 |
| cg09659400 | chr20 | Open Sea    | 0.670873299 | 0.882503968 | 0.2116307 | 0.002899 |
| cg01029637 | chr20 | North Shore | 0.660425022 | 0.87045466  | 0.2100296 | 0.001248 |
| cg00287413 | chr20 | North Shore | 0.708291082 | 0.917730083 | 0.209439  | 0.001339 |
| cg03569068 | chr20 | Open Sea    | 0.665585076 | 0.874956214 | 0.2093711 | 0.012885 |
| cg16848154 | chr20 | South Shelf | 0.617377779 | 0.826192405 | 0.2088146 | 0.002147 |
| cg09968709 | chr20 | Open Sea    | 0.6340646   | 0.841783431 | 0.2077188 | 0.002789 |
| cg09028855 | chr20 | North Shore | 0.686615402 | 0.894213723 | 0.2075983 | 0.000169 |
| cg08583859 | chr20 | South Shelf | 0.461282396 | 0.668466834 | 0.2071844 | 0.011073 |
| cg19059861 | chr20 | Open Sea    | 0.337300489 | 0.543308728 | 0.2060082 | 0.019805 |
| cg09675824 | chr20 | Island      | 0.638200315 | 0.843543339 | 0.205343  | 0.01508  |
| cg09966455 | chr20 | South Shelf | 0.621240291 | 0.82611337  | 0.2048731 | 0.000524 |
| cg13399773 | chr20 | Open Sea    | 0.707469202 | 0.91233704  | 0.2048678 | 0.00101  |

|            |       |             |             |             |           |          |
|------------|-------|-------------|-------------|-------------|-----------|----------|
| cg17775003 | chr20 | Open Sea    | 0.646107322 | 0.850295096 | 0.2041878 | 0.001427 |
| cg11801374 | chr20 | Open Sea    | 0.708903402 | 0.912396502 | 0.2034931 | 0.000284 |
| cg14378039 | chr20 | Open Sea    | 0.478510148 | 0.679967654 | 0.2014575 | 0.00134  |
| cg00046026 | chr20 | North Shore | 0.39004905  | 0.59032566  | 0.2002766 | 7.07E-06 |
| cg02797195 | chr21 | North Shore | 0.420552871 | 0.899082932 | 0.4785301 | 4.54E-09 |
| cg18597421 | chr21 | North Shore | 0.477533984 | 0.900244983 | 0.422711  | 1.39E-06 |
| cg10095801 | chr21 | South Shore | 0.513259283 | 0.932589488 | 0.4193302 | 2.33E-08 |
| cg19788250 | chr21 | North Shore | 0.465766335 | 0.869073568 | 0.4033072 | 0.019775 |
| cg24943066 | chr21 | North Shelf | 0.513556693 | 0.912948061 | 0.3993914 | 1.31E-08 |
| cg04617640 | chr21 | North Shore | 0.449572168 | 0.840733349 | 0.3911612 | 0.018449 |
| cg14414154 | chr21 | North Shelf | 0.50708985  | 0.894873886 | 0.387784  | 4.52E-05 |
| cg10198932 | chr21 | Open Sea    | 0.425138547 | 0.809533774 | 0.3843952 | 0.016595 |
| cg26048478 | chr21 | Open Sea    | 0.451395173 | 0.834889781 | 0.3834946 | 0.01806  |
| cg01286133 | chr21 | North Shore | 0.558184861 | 0.938967104 | 0.3807822 | 3.5E-09  |
| cg18500968 | chr21 | Open Sea    | 0.491937358 | 0.871340999 | 0.3794036 | 3.98E-06 |
| cg25937451 | chr21 | Open Sea    | 0.368873296 | 0.728907539 | 0.3600342 | 0.022474 |
| cg07172334 | chr21 | Open Sea    | 0.391185114 | 0.750112398 | 0.3589273 | 0.01405  |
| cg25023666 | chr21 | Open Sea    | 0.463262986 | 0.815611404 | 0.3523484 | 9.05E-06 |
| cg13520715 | chr21 | Open Sea    | 0.555407563 | 0.904997276 | 0.3495897 | 4.58E-05 |
| cg12363671 | chr21 | Open Sea    | 0.491483527 | 0.831634984 | 0.3401515 | 0.000754 |
| cg25143099 | chr21 | South Shelf | 0.532696004 | 0.851729182 | 0.3190332 | 3.64E-06 |
| cg25832305 | chr21 | South Shore | 0.604075371 | 0.920036617 | 0.3159612 | 1.45E-05 |
| cg26405759 | chr21 | South Shore | 0.522283376 | 0.837503574 | 0.3152202 | 0.009877 |
| cg26237628 | chr21 | Open Sea    | 0.485412716 | 0.800418235 | 0.3150055 | 0.000327 |
| cg01688776 | chr21 | Open Sea    | 0.456270375 | 0.761195684 | 0.3049253 | 0.004053 |
| cg25608949 | chr21 | Open Sea    | 0.572790386 | 0.875349124 | 0.3025587 | 0.000514 |
| cg11056129 | chr21 | Open Sea    | 0.492632282 | 0.791520337 | 0.2988881 | 0.012134 |
| cg26709720 | chr21 | Open Sea    | 0.582019285 | 0.875883233 | 0.2938639 | 0.009829 |
| cg25734539 | chr21 | Open Sea    | 0.514929235 | 0.807099422 | 0.2921702 | 0.007462 |
| cg24640676 | chr21 | Open Sea    | 0.471631435 | 0.756236266 | 0.2846048 | 0.003967 |
| cg03366992 | chr21 | South Shore | 0.392120028 | 0.663480288 | 0.2713603 | 2.13E-08 |
| cg02628840 | chr21 | Island      | 0.573674547 | 0.844102748 | 0.2704282 | 0.032109 |
| cg24423088 | chr21 | Open Sea    | 0.59320573  | 0.857166648 | 0.2639609 | 0.000168 |
| cg21871091 | chr21 | North Shelf | 0.309449067 | 0.569790396 | 0.2603413 | 0.01705  |
| cg02764897 | chr21 | Open Sea    | 0.536568807 | 0.794117603 | 0.2575488 | 0.00502  |
| cg05168609 | chr21 | Open Sea    | 0.547899388 | 0.80427577  | 0.2563764 | 0.005187 |
| cg04847841 | chr21 | South Shore | 0.67064249  | 0.925838126 | 0.2551956 | 9.54E-05 |
| cg12367786 | chr21 | South Shore | 0.337408178 | 0.590653121 | 0.2532449 | 0.000214 |
| cg02642585 | chr21 | Open Sea    | 0.620850694 | 0.871364127 | 0.2505134 | 0.000242 |
| cg08650934 | chr21 | Island      | 0.63234954  | 0.881776123 | 0.2494266 | 9.47E-06 |
| cg04351905 | chr21 | North Shore | 0.559894573 | 0.808769661 | 0.2488751 | 0.008808 |
| cg17367472 | chr21 | Open Sea    | 0.555836876 | 0.804421745 | 0.2485849 | 5.65E-05 |
| cg18574298 | chr21 | Open Sea    | 0.64458218  | 0.892680479 | 0.2480983 | 0.000696 |
| cg11506205 | chr21 | North Shelf | 0.680052487 | 0.925179058 | 0.2451266 | 0.001023 |
| cg07330438 | chr21 | North Shore | 0.455267762 | 0.699646934 | 0.2443792 | 0.035484 |
| cg16812893 | chr21 | Open Sea    | 0.589684589 | 0.833582636 | 0.243898  | 0.007347 |
| cg20857253 | chr21 | Open Sea    | 0.608987115 | 0.851785742 | 0.2427986 | 0.000474 |
| cg24359868 | chr21 | South Shelf | 0.640548924 | 0.882731411 | 0.2421825 | 0.000929 |
| cg02869163 | chr21 | South Shore | 0.506108842 | 0.747394421 | 0.2412856 | 0.032892 |
| cg25390243 | chr21 | Island      | 0.694340302 | 0.93410057  | 0.2397603 | 0.002052 |



|            |       |             |             |             |           |          |
|------------|-------|-------------|-------------|-------------|-----------|----------|
| cg27123464 | chr21 | North Shelf | 0.604837631 | 0.844131003 | 0.2392934 | 0.000171 |
| cg13863153 | chr21 | Open Sea    | 0.639609177 | 0.87522819  | 0.235619  | 5.13E-05 |
| cg03993463 | chr21 | Open Sea    | 0.663374803 | 0.897527049 | 0.2341522 | 6.5E-05  |
| cg23736024 | chr21 | Open Sea    | 0.661161368 | 0.895163579 | 0.2340022 | 0.000348 |
| cg00349542 | chr21 | North Shore | 0.60332022  | 0.836176699 | 0.2328565 | 0.034056 |
| cg17449254 | chr21 | Open Sea    | 0.607337731 | 0.840019449 | 0.2326817 | 0.001061 |
| cg10382945 | chr21 | Open Sea    | 0.653301941 | 0.882235067 | 0.2289331 | 0.002663 |
| cg11852796 | chr21 | Open Sea    | 0.349495616 | 0.577615432 | 0.2281198 | 0.00013  |
| cg03863756 | chr21 | Island      | 0.704335777 | 0.928742316 | 0.2244065 | 0.000308 |
| cg22643217 | chr21 | Open Sea    | 0.664069717 | 0.888001161 | 0.2239314 | 0.001094 |
| cg01716252 | chr21 | North Shore | 0.591993073 | 0.80930967  | 0.2173166 | 0.047503 |
| cg20488657 | chr21 | Open Sea    | 0.687171175 | 0.903538065 | 0.2163669 | 5.06E-05 |
| cg09456254 | chr21 | Open Sea    | 0.687866423 | 0.901063061 | 0.2131966 | 0.000104 |
| cg07057320 | chr21 | Open Sea    | 0.48621806  | 0.698650144 | 0.2124321 | 0.000169 |
| cg17035109 | chr21 | North Shelf | 0.541093059 | 0.752983641 | 0.2118906 | 0.008798 |
| cg01360586 | chr21 | North Shelf | 0.61624062  | 0.827371673 | 0.2111311 | 0.004776 |
| cg04658707 | chr21 | Island      | 0.629953193 | 0.839988014 | 0.2100348 | 0.008664 |
| cg13792279 | chr21 | Open Sea    | 0.680745252 | 0.890374142 | 0.2096289 | 0.00026  |
| cg23653443 | chr21 | Open Sea    | 0.724946761 | 0.932629606 | 0.2076828 | 1.56E-05 |
| cg21643128 | chr21 | South Shore | 0.610918276 | 0.814145288 | 0.203227  | 0.003099 |
| cg05030251 | chr21 | North Shore | 0.629180488 | 0.831813465 | 0.202633  | 0.005268 |
| cg03534481 | chr21 | North Shelf | 0.720233558 | 0.922380736 | 0.2021472 | 0.000389 |
| cg00488514 | chr22 | North Shore | 0.419873436 | 0.84343234  | 0.4235589 | 7.46E-09 |
| cg07959986 | chr22 | Open Sea    | 0.452760245 | 0.833862238 | 0.381102  | 0.000884 |
| cg04392554 | chr22 | Island      | 0.54826511  | 0.917856797 | 0.3695917 | 6.87E-06 |
| cg07280182 | chr22 | North Shore | 0.500150695 | 0.864942131 | 0.3647914 | 0.000822 |
| cg05799169 | chr22 | Island      | 0.375251217 | 0.729010751 | 0.3537595 | 0.042196 |
| cg19831369 | chr22 | South Shore | 0.510046573 | 0.853509371 | 0.3434628 | 1.64E-05 |
| cg12986453 | chr22 | North Shore | 0.520169495 | 0.862744843 | 0.3425753 | 3.27E-06 |
| cg08471335 | chr22 | Island      | 0.45970446  | 0.798144308 | 0.3384398 | 0.033932 |
| cg14596108 | chr22 | Island      | 0.515022521 | 0.840377804 | 0.3253553 | 0.000504 |
| cg18469292 | chr22 | South Shore | 0.571723413 | 0.89395116  | 0.3222277 | 6.54E-08 |
| cg10138313 | chr22 | Open Sea    | 0.434807703 | 0.742736114 | 0.3079284 | 0.004081 |
| cg10301236 | chr22 | South Shore | 0.516426252 | 0.820447694 | 0.3040214 | 0.011357 |
| cg27166177 | chr22 | Island      | 0.345234176 | 0.638615866 | 0.2933817 | 0.008636 |
| cg02553039 | chr22 | North Shore | 0.496024827 | 0.775604303 | 0.2795795 | 0.022631 |
| cg23346237 | chr22 | Island      | 0.479869678 | 0.757304932 | 0.2774353 | 0.033474 |
| cg13652373 | chr22 | South Shore | 0.438641852 | 0.713044843 | 0.274403  | 0.022397 |
| cg19174658 | chr22 | South Shelf | 0.63048607  | 0.903894792 | 0.2734087 | 8.68E-06 |
| cg12968041 | chr22 | South Shore | 0.621338727 | 0.894699237 | 0.2733605 | 0.000203 |
| cg22912095 | chr22 | South Shore | 0.659755396 | 0.930915508 | 0.2711601 | 6.42E-05 |
| cg23949216 | chr22 | North Shore | 0.614014149 | 0.883688198 | 0.269674  | 1.72E-05 |
| cg07305859 | chr22 | Island      | 0.672902778 | 0.938257845 | 0.2653551 | 0.000285 |
| cg14647989 | chr22 | South Shelf | 0.662615706 | 0.927568014 | 0.2649523 | 2.86E-05 |
| cg00344801 | chr22 | Island      | 0.423734576 | 0.682836678 | 0.2591021 | 0.049637 |
| cg03423957 | chr22 | North Shore | 0.535455564 | 0.79428438  | 0.2588288 | 0.002833 |
| cg21432763 | chr22 | Island      | 0.574577184 | 0.832840695 | 0.2582635 | 3.51E-06 |
| cg09290175 | chr22 | Island      | 0.652659405 | 0.909357164 | 0.2566978 | 1.52E-05 |
| cg24670330 | chr22 | North Shore | 0.630113345 | 0.880288427 | 0.2501751 | 3.29E-05 |
| cg19521610 | chr22 | North Shore | 0.310988267 | 0.56106447  | 0.2500762 | 0.042907 |

|            |       |             |             |             |           |          |
|------------|-------|-------------|-------------|-------------|-----------|----------|
| cg15665276 | chr22 | South Shelf | 0.641526847 | 0.89157985  | 0.250053  | 0.000116 |
| cg19206437 | chr22 | Open Sea    | 0.524199381 | 0.773365587 | 0.2491662 | 8.83E-06 |
| cg03097190 | chr22 | Open Sea    | 0.559620225 | 0.805719231 | 0.246099  | 0.023906 |
| cg02420032 | chr22 | North Shore | 0.669664572 | 0.912764567 | 0.2431    | 0.036227 |
| cg04360334 | chr22 | South Shore | 0.653349704 | 0.896314446 | 0.2429647 | 8.1E-05  |
| cg13772700 | chr22 | Island      | 0.525185885 | 0.766722638 | 0.2415368 | 8.21E-06 |
| cg22424213 | chr22 | South Shore | 0.676968064 | 0.917507804 | 0.2405397 | 0.000393 |
| cg17654567 | chr22 | South Shelf | 0.633786742 | 0.873106042 | 0.2393193 | 0.00477  |
| cg02601618 | chr22 | Open Sea    | 0.64666547  | 0.879565859 | 0.2329004 | 0.000267 |
| cg17827477 | chr22 | Island      | 0.447262669 | 0.679523497 | 0.2322608 | 0.000283 |
| cg01245880 | chr22 | North Shore | 0.524827635 | 0.755212577 | 0.2303849 | 0.001555 |
| cg10799608 | chr22 | Open Sea    | 0.557859628 | 0.787113781 | 0.2292542 | 0.004384 |
| cg26034629 | chr22 | Open Sea    | 0.623299312 | 0.850528437 | 0.2272291 | 0.000339 |
| cg13114028 | chr22 | North Shelf | 0.690769337 | 0.916270077 | 0.2255007 | 0.002217 |
| cg04583339 | chr22 | Open Sea    | 0.549806285 | 0.773944174 | 0.2241379 | 0.033628 |
| cg04873169 | chr22 | North Shore | 0.640760516 | 0.863669155 | 0.2229086 | 1.34E-05 |
| cg00743803 | chr22 | North Shore | 0.708938625 | 0.929407939 | 0.2204693 | 0.000129 |
| cg17522369 | chr22 | North Shore | 0.600969418 | 0.819641366 | 0.2186719 | 0.002902 |
| cg00243272 | chr22 | Island      | 0.519686356 | 0.73725826  | 0.2175719 | 0.003031 |
| cg02580626 | chr22 | Open Sea    | 0.602009548 | 0.819482419 | 0.2174729 | 0.047279 |
| cg03312805 | chr22 | South Shelf | 0.475644484 | 0.692410282 | 0.2167658 | 0.027138 |
| cg05090319 | chr22 | Island      | 0.712408528 | 0.929155605 | 0.2167471 | 0.000126 |
| cg18507053 | chr22 | South Shelf | 0.668543762 | 0.88478287  | 0.2162391 | 0.00057  |
| cg25795369 | chr22 | North Shelf | 0.639318202 | 0.855305197 | 0.215987  | 0.001578 |
| cg00682553 | chr22 | Island      | 0.695546424 | 0.909801106 | 0.2142547 | 0.005885 |
| cg04406762 | chr22 | North Shelf | 0.620751265 | 0.831876148 | 0.2111249 | 0.028602 |
| cg09835278 | chr22 | Open Sea    | 0.631046247 | 0.84101644  | 0.2099702 | 0.001068 |
| cg16104384 | chr22 | South Shore | 0.600693793 | 0.810464883 | 0.2097711 | 0.001121 |
| cg20811788 | chr22 | Island      | 0.498121215 | 0.706255475 | 0.2081343 | 0.000426 |
| cg04722059 | chr22 | Island      | 0.624977122 | 0.832805866 | 0.2078287 | 0.001674 |
| cg07054523 | chr22 | South Shelf | 0.671250427 | 0.875612215 | 0.2043618 | 0.010775 |
| cg04556646 | chr22 | North Shore | 0.466542395 | 0.670884653 | 0.2043423 | 0.021033 |
| cg20904010 | chr22 | Open Sea    | 0.674152186 | 0.876088427 | 0.2019362 | 0.000269 |
| cg13872278 | chr22 | South Shore | 0.661367644 | 0.863280308 | 0.2019127 | 0.01567  |
| cg06564500 | chr22 | North Shore | 0.707267298 | 0.908303475 | 0.2010362 | 0.000417 |
| cg01277983 | chr22 | Open Sea    | 0.613736737 | 0.814434756 | 0.200698  | 0.0032   |
| cg13151171 | chr3  | Open Sea    | 0.40659373  | 0.853624407 | 0.4470307 | 0.006287 |
| cg11011913 | chr3  | Open Sea    | 0.482199801 | 0.913457674 | 0.4312579 | 1.44E-08 |
| cg18503031 | chr3  | Open Sea    | 0.486081043 | 0.893771961 | 0.4076909 | 0.000306 |
| cg10719144 | chr3  | Open Sea    | 0.391611138 | 0.777836422 | 0.3862253 | 0.000738 |
| cg03804083 | chr3  | Open Sea    | 0.521196787 | 0.90546951  | 0.3842727 | 5.7E-07  |
| cg18142906 | chr3  | Open Sea    | 0.407337043 | 0.784163164 | 0.3768261 | 0.001765 |
| cg01576260 | chr3  | Open Sea    | 0.50726547  | 0.883600973 | 0.3763355 | 5.9E-09  |
| cg23012591 | chr3  | Open Sea    | 0.512020739 | 0.88801959  | 0.3759989 | 1.4E-07  |
| cg19918599 | chr3  | Open Sea    | 0.525276302 | 0.886361117 | 0.3610848 | 0.022099 |
| cg24667736 | chr3  | Open Sea    | 0.302526156 | 0.660205505 | 0.3576793 | 0.020575 |
| cg25358250 | chr3  | Open Sea    | 0.439363808 | 0.785878875 | 0.3465151 | 0.006786 |
| cg02093692 | chr3  | Open Sea    | 0.391579878 | 0.73800553  | 0.3464257 | 0.024745 |
| cg04906886 | chr3  | Open Sea    | 0.49480169  | 0.841119785 | 0.3463181 | 5.16E-05 |
| cg13523819 | chr3  | Open Sea    | 0.548443754 | 0.893033536 | 0.3445898 | 0.002618 |

|            |      |             |             |             |           |          |
|------------|------|-------------|-------------|-------------|-----------|----------|
| cg07106766 | chr3 | Open Sea    | 0.422093246 | 0.765697026 | 0.3436038 | 0.001161 |
| cg23620049 | chr3 | Open Sea    | 0.552046474 | 0.893239292 | 0.3411928 | 1.5E-06  |
| cg21646032 | chr3 | Open Sea    | 0.465371709 | 0.802298644 | 0.3369269 | 0.002717 |
| cg11211952 | chr3 | Open Sea    | 0.539971824 | 0.876379943 | 0.3364081 | 2.55E-05 |
| cg06339275 | chr3 | Open Sea    | 0.452527064 | 0.785950399 | 0.3334233 | 9.4E-06  |
| cg19963231 | chr3 | Open Sea    | 0.446388822 | 0.77941469  | 0.3330259 | 9.88E-07 |
| cg22601300 | chr3 | South Shelf | 0.527533797 | 0.859617745 | 0.3320839 | 1.69E-08 |
| cg16810559 | chr3 | Open Sea    | 0.442228765 | 0.770245445 | 0.3280167 | 0.002948 |
| cg01458495 | chr3 | Open Sea    | 0.540131647 | 0.864652365 | 0.3245207 | 0.024194 |
| cg13634423 | chr3 | Open Sea    | 0.595475116 | 0.918457084 | 0.322982  | 3.48E-06 |
| cg10590657 | chr3 | Open Sea    | 0.422232106 | 0.743370588 | 0.3211385 | 0.016079 |
| cg17480641 | chr3 | South Shore | 0.457499061 | 0.776812563 | 0.3193135 | 0.001784 |
| cg10964627 | chr3 | Open Sea    | 0.509335393 | 0.828450806 | 0.3191154 | 0.024834 |
| cg02583589 | chr3 | Open Sea    | 0.478369363 | 0.797036545 | 0.3186672 | 8.72E-07 |
| cg20197622 | chr3 | Open Sea    | 0.552641679 | 0.868232035 | 0.3155904 | 6.52E-06 |
| cg23340034 | chr3 | Open Sea    | 0.577056945 | 0.891851545 | 0.3147946 | 2.15E-07 |
| cg21565017 | chr3 | Open Sea    | 0.607023293 | 0.915645574 | 0.3086223 | 8.96E-07 |
| cg26334154 | chr3 | Open Sea    | 0.478169689 | 0.786630816 | 0.3084611 | 0.004751 |
| cg02706919 | chr3 | Open Sea    | 0.422516636 | 0.729648738 | 0.3071321 | 0.04555  |
| cg07064537 | chr3 | Open Sea    | 0.454350006 | 0.761429795 | 0.3070798 | 0.00544  |
| cg18147676 | chr3 | Open Sea    | 0.546209192 | 0.851274804 | 0.3050656 | 0.039077 |
| cg19811231 | chr3 | Open Sea    | 0.586440783 | 0.891082516 | 0.3046417 | 1.75E-05 |
| cg16921789 | chr3 | Open Sea    | 0.55540032  | 0.859777534 | 0.3043772 | 0.000856 |
| cg01532749 | chr3 | Open Sea    | 0.479983662 | 0.7835225   | 0.3035388 | 0.023161 |
| cg15442678 | chr3 | North Shelf | 0.448134786 | 0.750824154 | 0.3026894 | 0.00021  |
| cg14329285 | chr3 | Open Sea    | 0.565161996 | 0.867008669 | 0.3018467 | 0.004358 |
| cg18060030 | chr3 | Open Sea    | 0.611803644 | 0.910727935 | 0.2989243 | 0.0009   |
| cg25707745 | chr3 | Open Sea    | 0.492925806 | 0.791348776 | 0.298423  | 1.4E-05  |
| cg21360867 | chr3 | Open Sea    | 0.610202837 | 0.907927248 | 0.2977244 | 7.4E-08  |
| cg22626825 | chr3 | Open Sea    | 0.468891896 | 0.766260409 | 0.2973685 | 0.032647 |
| cg26283496 | chr3 | Open Sea    | 0.491549241 | 0.788435684 | 0.2968864 | 0.039951 |
| cg06038444 | chr3 | South Shelf | 0.642072878 | 0.938540572 | 0.2964677 | 1.98E-06 |
| cg22379436 | chr3 | Open Sea    | 0.598833985 | 0.895225315 | 0.2963913 | 8.88E-05 |
| cg20519665 | chr3 | Open Sea    | 0.595490992 | 0.891870951 | 0.29638   | 4.7E-06  |
| cg12432161 | chr3 | Open Sea    | 0.583262089 | 0.879298319 | 0.2960362 | 1.56E-05 |
| cg14526375 | chr3 | Open Sea    | 0.402791767 | 0.697760982 | 0.2949692 | 0.000898 |
| cg10623221 | chr3 | South Shelf | 0.474281772 | 0.769153384 | 0.2948716 | 0.001705 |
| cg02760495 | chr3 | Open Sea    | 0.525325441 | 0.819593739 | 0.2942683 | 0.046456 |
| cg08037727 | chr3 | Open Sea    | 0.522550317 | 0.814866219 | 0.2923159 | 0.025893 |
| cg11883790 | chr3 | Open Sea    | 0.610701068 | 0.902499463 | 0.2917984 | 1.44E-05 |
| cg08881614 | chr3 | South Shelf | 0.596836715 | 0.88789556  | 0.2910588 | 0.000162 |
| cg07450292 | chr3 | Open Sea    | 0.47800649  | 0.768689477 | 0.290683  | 9.83E-08 |
| cg03660603 | chr3 | Open Sea    | 0.576264881 | 0.866103067 | 0.2898382 | 5.97E-05 |
| cg25374494 | chr3 | Open Sea    | 0.546468491 | 0.835645015 | 0.2891765 | 8.98E-06 |
| cg14718495 | chr3 | Open Sea    | 0.546051249 | 0.834389118 | 0.2883379 | 7.15E-06 |
| cg22673972 | chr3 | Open Sea    | 0.554003071 | 0.841256518 | 0.2872534 | 0.007736 |
| cg05979170 | chr3 | Open Sea    | 0.487060546 | 0.773139078 | 0.2860785 | 0.042787 |
| cg24173753 | chr3 | Open Sea    | 0.586802151 | 0.872554532 | 0.2857524 | 0.005529 |
| cg07557173 | chr3 | Open Sea    | 0.470221302 | 0.755891082 | 0.2856698 | 0.042009 |
| cg13590456 | chr3 | Open Sea    | 0.5718613   | 0.857108826 | 0.2852475 | 0.017014 |

|            |      |             |             |             |           |          |
|------------|------|-------------|-------------|-------------|-----------|----------|
| cg19825437 | chr3 | North Shelf | 0.592006079 | 0.877249333 | 0.2852433 | 0.00018  |
| cg01882260 | chr3 | Open Sea    | 0.31621531  | 0.597670546 | 0.2814552 | 0.006691 |
| cg00832928 | chr3 | Island      | 0.550447772 | 0.830954821 | 0.280507  | 0.000692 |
| cg24874998 | chr3 | Open Sea    | 0.404675903 | 0.683647905 | 0.278972  | 4.2E-07  |
| cg24082174 | chr3 | South Shore | 0.569424063 | 0.847680147 | 0.2782561 | 0.025232 |
| cg10548708 | chr3 | North Shelf | 0.587214656 | 0.864732299 | 0.2775176 | 0.007565 |
| cg01945223 | chr3 | Open Sea    | 0.591008341 | 0.868289396 | 0.2772811 | 0.002681 |
| cg10638793 | chr3 | Open Sea    | 0.638038626 | 0.915111853 | 0.2770732 | 7.69E-05 |
| cg09089913 | chr3 | Open Sea    | 0.61825358  | 0.893854242 | 0.2756007 | 1.24E-09 |
| cg15607292 | chr3 | Open Sea    | 0.568041359 | 0.843595103 | 0.2755537 | 0.006853 |
| cg00235661 | chr3 | South Shore | 0.539799199 | 0.81482803  | 0.2750288 | 0.006645 |
| cg10518475 | chr3 | Open Sea    | 0.595523323 | 0.87026794  | 0.2747446 | 7.86E-06 |
| cg04458548 | chr3 | Open Sea    | 0.593320013 | 0.867044625 | 0.2737246 | 2.63E-05 |
| cg25593573 | chr3 | South Shore | 0.389757615 | 0.663120638 | 0.273363  | 0.002238 |
| cg18589504 | chr3 | South Shelf | 0.565882555 | 0.838471018 | 0.2725885 | 0.01417  |
| cg27345946 | chr3 | South Shore | 0.280871957 | 0.553071062 | 0.2721991 | 0.000655 |
| cg00757822 | chr3 | Open Sea    | 0.494792485 | 0.76684676  | 0.2720543 | 0.000757 |
| cg25499537 | chr3 | North Shore | 0.400940178 | 0.672479306 | 0.2715391 | 0.009247 |
| cg19928195 | chr3 | Open Sea    | 0.577262129 | 0.848785733 | 0.2715236 | 0.028888 |
| cg03434780 | chr3 | Open Sea    | 0.611672577 | 0.883062597 | 0.27139   | 0.000776 |
| cg09851241 | chr3 | Open Sea    | 0.634735463 | 0.905315232 | 0.2705798 | 3.17E-07 |
| cg18543142 | chr3 | Open Sea    | 0.60574421  | 0.874640834 | 0.2688966 | 2.69E-06 |
| cg15225056 | chr3 | North Shelf | 0.63325524  | 0.901515746 | 0.2682605 | 7.23E-05 |
| cg07587475 | chr3 | Open Sea    | 0.669666218 | 0.936850634 | 0.2671844 | 3.53E-06 |
| cg23542948 | chr3 | Open Sea    | 0.510548317 | 0.77764399  | 0.2670957 | 0.029533 |
| cg24977541 | chr3 | South Shore | 0.561595006 | 0.828101364 | 0.2665064 | 0.003911 |
| cg17151621 | chr3 | Open Sea    | 0.462554653 | 0.727043263 | 0.2644886 | 6.56E-06 |
| cg24156261 | chr3 | Open Sea    | 0.636709106 | 0.899438917 | 0.2627298 | 3.88E-05 |
| cg20224885 | chr3 | Open Sea    | 0.466023042 | 0.726498159 | 0.2604751 | 0.001898 |
| cg08276221 | chr3 | Open Sea    | 0.643482866 | 0.901265052 | 0.2577822 | 4.85E-05 |
| cg24278076 | chr3 | Open Sea    | 0.653253771 | 0.910031919 | 0.2567781 | 0.000264 |
| cg11484936 | chr3 | Open Sea    | 0.532013493 | 0.785181892 | 0.2531684 | 0.038349 |
| cg24435939 | chr3 | Open Sea    | 0.60533446  | 0.857874939 | 0.2525405 | 0.041213 |
| cg16529676 | chr3 | Open Sea    | 0.588319884 | 0.840833988 | 0.2525141 | 0.000625 |
| cg08510718 | chr3 | Open Sea    | 0.635818179 | 0.887773729 | 0.2519555 | 0.000153 |
| cg23976846 | chr3 | Open Sea    | 0.411055028 | 0.662972142 | 0.2519171 | 0.002909 |
| cg03831180 | chr3 | Open Sea    | 0.226951634 | 0.478742465 | 0.2517908 | 0.00013  |
| cg02696881 | chr3 | Open Sea    | 0.560548667 | 0.811888765 | 0.2513401 | 0.000989 |
| cg12174409 | chr3 | South Shore | 0.648926851 | 0.900096947 | 0.2511701 | 8.33E-05 |
| cg00003965 | chr3 | Open Sea    | 0.635190175 | 0.885554338 | 0.2503642 | 0.000276 |
| cg27502580 | chr3 | Open Sea    | 0.641072088 | 0.891038271 | 0.2499662 | 0.000134 |
| cg15371566 | chr3 | Open Sea    | 0.45210436  | 0.701807747 | 0.2497034 | 0.000131 |
| cg11857626 | chr3 | Open Sea    | 0.641608924 | 0.891289266 | 0.2496803 | 2.68E-05 |
| cg18453551 | chr3 | Open Sea    | 0.391216151 | 0.640577576 | 0.2493614 | 0.000698 |
| cg17891906 | chr3 | North Shelf | 0.628194708 | 0.876930234 | 0.2487355 | 0.002827 |
| cg19008646 | chr3 | Open Sea    | 0.625020378 | 0.87361833  | 0.248598  | 0.000244 |
| cg01438868 | chr3 | Open Sea    | 0.462147359 | 0.709690788 | 0.2475434 | 0.00254  |
| cg12406124 | chr3 | North Shore | 0.627460238 | 0.874946411 | 0.2474862 | 0.010719 |
| cg03825810 | chr3 | Open Sea    | 0.502679318 | 0.749337884 | 0.2466586 | 0.00016  |
| cg07959956 | chr3 | North Shore | 0.558638758 | 0.805231191 | 0.2465924 | 0.045905 |

|            |      |             |             |             |           |          |
|------------|------|-------------|-------------|-------------|-----------|----------|
| cg25528121 | chr3 | Open Sea    | 0.602361623 | 0.848837044 | 0.2464754 | 0.000317 |
| cg22211507 | chr3 | Open Sea    | 0.357058642 | 0.603358061 | 0.2462994 | 0.008727 |
| cg23719209 | chr3 | Open Sea    | 0.568149285 | 0.813835964 | 0.2456867 | 0.044355 |
| cg11835020 | chr3 | Open Sea    | 0.487464887 | 0.732889593 | 0.2454247 | 0.001977 |
| cg11375831 | chr3 | Open Sea    | 0.634052717 | 0.879103336 | 0.2450506 | 7.02E-05 |
| cg10665123 | chr3 | Open Sea    | 0.435081123 | 0.679894458 | 0.2448133 | 0.031284 |
| cg20752683 | chr3 | Open Sea    | 0.549882095 | 0.79464519  | 0.2447631 | 0.041398 |
| cg22305574 | chr3 | Open Sea    | 0.559457481 | 0.804158058 | 0.2447006 | 0.026764 |
| cg14928452 | chr3 | Open Sea    | 0.616903011 | 0.860778075 | 0.2438751 | 0.000322 |
| cg13151664 | chr3 | Open Sea    | 0.648805882 | 0.89262415  | 0.2438183 | 0.000402 |
| cg02700130 | chr3 | Open Sea    | 0.585788952 | 0.828990943 | 0.243202  | 0.035573 |
| cg12906963 | chr3 | Open Sea    | 0.511875025 | 0.754343864 | 0.2424688 | 0.000617 |
| cg16503628 | chr3 | Open Sea    | 0.465051509 | 0.707159776 | 0.2421083 | 0.023059 |
| cg01081718 | chr3 | North Shore | 0.619358955 | 0.859264579 | 0.2399056 | 0.002398 |
| cg04396010 | chr3 | Open Sea    | 0.565179409 | 0.804004736 | 0.2388253 | 7.79E-06 |
| cg24275159 | chr3 | North Shelf | 0.668673503 | 0.907060852 | 0.2383873 | 9.67E-06 |
| cg03498588 | chr3 | Open Sea    | 0.676573265 | 0.914578443 | 0.2380052 | 0.001774 |
| cg25631489 | chr3 | South Shore | 0.283962731 | 0.521929128 | 0.2379664 | 0.003768 |
| cg06220604 | chr3 | South Shelf | 0.24749207  | 0.484318587 | 0.2368265 | 4.88E-07 |
| cg25565505 | chr3 | Open Sea    | 0.62388339  | 0.85987256  | 0.2359892 | 0.000376 |
| cg03882967 | chr3 | Open Sea    | 0.535166061 | 0.770202243 | 0.2350362 | 0.001359 |
| cg03545548 | chr3 | Open Sea    | 0.571217607 | 0.805294165 | 0.2340766 | 0.028819 |
| cg25317435 | chr3 | Open Sea    | 0.620841738 | 0.854644789 | 0.2338031 | 6.75E-05 |
| cg11624728 | chr3 | South Shore | 0.509901157 | 0.743687724 | 0.2337866 | 0.028084 |
| cg00423655 | chr3 | Open Sea    | 0.584924719 | 0.818372311 | 0.2334476 | 0.0022   |
| cg21026460 | chr3 | Open Sea    | 0.529904502 | 0.762924546 | 0.23302   | 0.034964 |
| cg12924224 | chr3 | Open Sea    | 0.607797701 | 0.840216283 | 0.2324186 | 0.001405 |
| cg19140928 | chr3 | Open Sea    | 0.666352028 | 0.89859848  | 0.2322465 | 0.000573 |
| cg15149374 | chr3 | Open Sea    | 0.654842455 | 0.886074073 | 0.2312316 | 9.59E-05 |
| cg13614060 | chr3 | Open Sea    | 0.600627853 | 0.8313812   | 0.2307533 | 0.000294 |
| cg27235955 | chr3 | Open Sea    | 0.660381417 | 0.890933588 | 0.2305522 | 1.38E-05 |
| cg00486998 | chr3 | Open Sea    | 0.524571488 | 0.754214457 | 0.229643  | 0.049525 |
| cg16338011 | chr3 | Open Sea    | 0.393294201 | 0.622409559 | 0.2291154 | 0.02737  |
| cg20138861 | chr3 | Open Sea    | 0.660348802 | 0.889257335 | 0.2289085 | 0.000519 |
| cg20566970 | chr3 | Open Sea    | 0.511162481 | 0.740048187 | 0.2288857 | 0.001325 |
| cg05580560 | chr3 | Open Sea    | 0.589745204 | 0.81831449  | 0.2285693 | 0.037094 |
| cg21864732 | chr3 | Open Sea    | 0.544136244 | 0.772303896 | 0.2281677 | 0.017629 |
| cg21383534 | chr3 | Open Sea    | 0.651881639 | 0.88004777  | 0.2281661 | 0.008895 |
| cg24984506 | chr3 | Open Sea    | 0.656176075 | 0.883463223 | 0.2272871 | 0.000385 |
| cg02012769 | chr3 | Open Sea    | 0.703484606 | 0.930112631 | 0.226628  | 0.000171 |
| cg21977522 | chr3 | Open Sea    | 0.415429294 | 0.641760258 | 0.226331  | 0.000235 |
| cg06140698 | chr3 | Open Sea    | 0.625030133 | 0.850634836 | 0.2256047 | 0.043038 |
| cg08177332 | chr3 | Open Sea    | 0.481831445 | 0.706685967 | 0.2248545 | 0.000546 |
| cg26226254 | chr3 | Open Sea    | 0.628390889 | 0.852948743 | 0.2245579 | 0.000252 |
| cg02646643 | chr3 | Open Sea    | 0.516293285 | 0.738268421 | 0.2219751 | 8.19E-05 |
| cg25671428 | chr3 | Open Sea    | 0.69724082  | 0.918663641 | 0.2214228 | 0.00121  |
| cg05837855 | chr3 | Open Sea    | 0.389511618 | 0.610681873 | 0.2211703 | 3.58E-05 |
| cg07626033 | chr3 | South Shore | 0.508180609 | 0.728625424 | 0.2204448 | 0.000901 |
| cg19835040 | chr3 | Open Sea    | 0.68056081  | 0.900914448 | 0.2203536 | 0.046674 |
| cg20943372 | chr3 | Open Sea    | 0.569431281 | 0.789585077 | 0.2201538 | 0.040196 |

|            |      |             |             |             |           |          |
|------------|------|-------------|-------------|-------------|-----------|----------|
| cg22117188 | chr3 | Open Sea    | 0.416140034 | 0.635619197 | 0.2194792 | 0.031773 |
| cg10365562 | chr3 | North Shelf | 0.51579665  | 0.735271934 | 0.2194753 | 9.54E-05 |
| cg19795338 | chr3 | Open Sea    | 0.45821107  | 0.677365212 | 0.2191541 | 0.000259 |
| cg26073181 | chr3 | Open Sea    | 0.702232306 | 0.921198952 | 0.2189666 | 0.000178 |
| cg02605996 | chr3 | Open Sea    | 0.368186945 | 0.586661157 | 0.2184742 | 0.002154 |
| cg13688966 | chr3 | Open Sea    | 0.647866227 | 0.866038393 | 0.2181722 | 0.000796 |
| cg07732593 | chr3 | Open Sea    | 0.598618726 | 0.816762877 | 0.2181442 | 0.004299 |
| cg07458793 | chr3 | Open Sea    | 0.717617712 | 0.935089988 | 0.2174723 | 0.001302 |
| cg01556799 | chr3 | Open Sea    | 0.41716997  | 0.633686461 | 0.2165165 | 0.000616 |
| cg03275461 | chr3 | Open Sea    | 0.583626802 | 0.799778418 | 0.2161516 | 0.004538 |
| cg17336354 | chr3 | Open Sea    | 0.695888528 | 0.911859735 | 0.2159712 | 0.000161 |
| cg25159668 | chr3 | Open Sea    | 0.643276939 | 0.859245107 | 0.2159682 | 0.00116  |
| cg14861047 | chr3 | Open Sea    | 0.607187446 | 0.82299252  | 0.2158051 | 0.000724 |
| cg27011350 | chr3 | Open Sea    | 0.650542461 | 0.866094826 | 0.2155524 | 0.004164 |
| cg14844401 | chr3 | Open Sea    | 0.633121469 | 0.848595062 | 0.2154736 | 0.005534 |
| cg04474190 | chr3 | Open Sea    | 0.644872645 | 0.859998879 | 0.2151262 | 0.012499 |
| cg19855559 | chr3 | Open Sea    | 0.526441305 | 0.741357227 | 0.2149159 | 0.008244 |
| cg12027424 | chr3 | Open Sea    | 0.588064276 | 0.802712804 | 0.2146485 | 0.019526 |
| cg06722212 | chr3 | Open Sea    | 0.605740154 | 0.820308082 | 0.2145679 | 0.040776 |
| cg06340382 | chr3 | Open Sea    | 0.609440128 | 0.823939035 | 0.2144989 | 0.006806 |
| cg16899444 | chr3 | Open Sea    | 0.70148646  | 0.915947637 | 0.2144612 | 0.000372 |
| cg13638983 | chr3 | South Shelf | 0.303078957 | 0.51733172  | 0.2142528 | 0.000101 |
| cg05261893 | chr3 | Open Sea    | 0.598078662 | 0.812180188 | 0.2141015 | 0.015532 |
| cg22314684 | chr3 | Open Sea    | 0.694458431 | 0.908183719 | 0.2137253 | 6.51E-05 |
| cg23527468 | chr3 | Open Sea    | 0.570051621 | 0.783743094 | 0.2136915 | 0.000969 |
| cg00127781 | chr3 | Open Sea    | 0.569426573 | 0.783064638 | 0.2136381 | 0.020818 |
| cg15721238 | chr3 | Open Sea    | 0.596639722 | 0.80998054  | 0.2133408 | 0.035242 |
| cg11095099 | chr3 | South Shelf | 0.632850877 | 0.845807319 | 0.2129564 | 0.030676 |
| cg13757263 | chr3 | Open Sea    | 0.414266313 | 0.627007134 | 0.2127408 | 1.55E-05 |
| cg11370064 | chr3 | Open Sea    | 0.485566436 | 0.697822855 | 0.2122564 | 0.007379 |
| cg26645655 | chr3 | Open Sea    | 0.23692236  | 0.449061893 | 0.2121395 | 0.022877 |
| cg11177552 | chr3 | Open Sea    | 0.694846111 | 0.906945406 | 0.2120993 | 5.41E-05 |
| cg20388967 | chr3 | North Shelf | 0.587229104 | 0.799231755 | 0.2120027 | 0.014163 |
| cg08553630 | chr3 | South Shelf | 0.689770904 | 0.901516749 | 0.2117458 | 0.002263 |
| cg12987403 | chr3 | Open Sea    | 0.662115611 | 0.873703657 | 0.211588  | 0.001038 |
| cg03854852 | chr3 | North Shore | 0.671270451 | 0.882317839 | 0.2110474 | 0.008123 |
| cg08450017 | chr3 | Open Sea    | 0.63027332  | 0.840523048 | 0.2102497 | 0.024261 |
| cg22931622 | chr3 | Open Sea    | 0.628263956 | 0.838455165 | 0.2101912 | 0.009029 |
| cg12309030 | chr3 | Open Sea    | 0.591935825 | 0.801664333 | 0.2097285 | 0.047016 |
| cg26375196 | chr3 | Open Sea    | 0.661291452 | 0.870827948 | 0.2095365 | 1.95E-05 |
| cg26328626 | chr3 | Open Sea    | 0.497955493 | 0.70677481  | 0.2088193 | 6.17E-05 |
| cg09407319 | chr3 | North Shelf | 0.559400077 | 0.768090857 | 0.2086908 | 0.017226 |
| cg26028315 | chr3 | South Shelf | 0.642828771 | 0.851368511 | 0.2085397 | 0.004414 |
| cg15622805 | chr3 | North Shelf | 0.590210116 | 0.79829727  | 0.2080872 | 0.003988 |
| cg15097422 | chr3 | Open Sea    | 0.470013523 | 0.677886734 | 0.2078732 | 0.012225 |
| cg17206604 | chr3 | Open Sea    | 0.717027026 | 0.924248663 | 0.2072216 | 3.76E-05 |
| cg16339097 | chr3 | Open Sea    | 0.602515702 | 0.808826816 | 0.2063111 | 0.000948 |
| cg00026141 | chr3 | North Shore | 0.567341936 | 0.773639069 | 0.2062971 | 0.047411 |
| cg09007331 | chr3 | Open Sea    | 0.60057658  | 0.806794547 | 0.206218  | 0.016193 |
| cg27103436 | chr3 | North Shore | 0.655304942 | 0.861259007 | 0.2059541 | 0.006681 |

|            |      |             |             |             |           |          |
|------------|------|-------------|-------------|-------------|-----------|----------|
| cg20892840 | chr3 | South Shore | 0.506948194 | 0.712240044 | 0.2052918 | 0.026651 |
| cg10721942 | chr3 | South Shelf | 0.643746549 | 0.848911928 | 0.2051654 | 5.29E-05 |
| cg17643564 | chr3 | Open Sea    | 0.721202879 | 0.925891209 | 0.2046883 | 0.000759 |
| cg01425409 | chr3 | North Shelf | 0.545344419 | 0.749504137 | 0.2041597 | 0.001117 |
| cg04747996 | chr3 | Open Sea    | 0.725184377 | 0.92925086  | 0.2040665 | 0.000151 |
| cg12191488 | chr3 | South Shelf | 0.606442714 | 0.810338232 | 0.2038955 | 0.000293 |
| cg25756867 | chr3 | Open Sea    | 0.682790141 | 0.886628331 | 0.2038382 | 0.000669 |
| cg16957824 | chr3 | Open Sea    | 0.664260173 | 0.867988315 | 0.2037281 | 0.030152 |
| cg16143997 | chr3 | Open Sea    | 0.577466477 | 0.780856395 | 0.2033899 | 0.000318 |
| cg06339090 | chr3 | Open Sea    | 0.51438744  | 0.717658068 | 0.2032706 | 0.00019  |
| cg19833674 | chr3 | Open Sea    | 0.710303917 | 0.913568948 | 0.203265  | 0.000344 |
| cg04558907 | chr3 | Open Sea    | 0.708365204 | 0.911585551 | 0.2032203 | 0.000484 |
| cg25423174 | chr3 | Open Sea    | 0.497482094 | 0.700175501 | 0.2026934 | 0.036314 |
| cg09883745 | chr3 | Open Sea    | 0.686858994 | 0.889003443 | 0.2021444 | 0.000323 |
| cg23054394 | chr3 | North Shore | 0.737536312 | 0.939496394 | 0.2019601 | 0.002048 |
| cg03668982 | chr3 | South Shore | 0.698841527 | 0.90079548  | 0.201954  | 5.49E-05 |
| cg24815638 | chr3 | Open Sea    | 0.554614837 | 0.755925045 | 0.2013102 | 0.003117 |
| cg00980904 | chr3 | North Shore | 0.425891713 | 0.626487104 | 0.2005954 | 0.031998 |
| cg03018634 | chr3 | South Shelf | 0.647780519 | 0.848273812 | 0.2004933 | 0.007973 |
| cg02734358 | chr4 | North Shore | 0.203050649 | 0.717927199 | 0.5148766 | 5.71E-11 |
| cg18053973 | chr4 | Open Sea    | 0.264659649 | 0.744229696 | 0.47957   | 3.05E-05 |
| cg18463607 | chr4 | North Shore | 0.409559625 | 0.861152533 | 0.4515929 | 6.11E-05 |
| cg24600608 | chr4 | Open Sea    | 0.451833982 | 0.881347488 | 0.4295135 | 3.13E-06 |
| cg18720506 | chr4 | Open Sea    | 0.488322671 | 0.90557265  | 0.41725   | 3.82E-07 |
| cg26693439 | chr4 | Open Sea    | 0.32161461  | 0.734101675 | 0.4124871 | 3.94E-08 |
| cg12144446 | chr4 | Open Sea    | 0.402884194 | 0.797993221 | 0.395109  | 0.000709 |
| cg09464883 | chr4 | Open Sea    | 0.513746031 | 0.904516197 | 0.3907702 | 1.59E-06 |
| cg22490722 | chr4 | Open Sea    | 0.555591966 | 0.943893391 | 0.3883014 | 6.33E-09 |
| cg05267427 | chr4 | Open Sea    | 0.441748713 | 0.820471939 | 0.3787232 | 0.023327 |
| cg14665366 | chr4 | North Shore | 0.501528439 | 0.877194001 | 0.3756656 | 1.34E-05 |
| cg14155327 | chr4 | Open Sea    | 0.427166655 | 0.801145354 | 0.3739787 | 0.026457 |
| cg10190898 | chr4 | Open Sea    | 0.502223744 | 0.874959906 | 0.3727362 | 8.08E-06 |
| cg26544722 | chr4 | Open Sea    | 0.407402352 | 0.777590892 | 0.3701885 | 9.4E-08  |
| cg18969798 | chr4 | Open Sea    | 0.496545627 | 0.864962791 | 0.3684172 | 1.79E-07 |
| cg06859106 | chr4 | South Shelf | 0.449639734 | 0.815801624 | 0.3661619 | 0.001148 |
| cg00610294 | chr4 | South Shore | 0.476712434 | 0.842514403 | 0.365802  | 0.000169 |
| cg08273672 | chr4 | South Shelf | 0.41574147  | 0.777703089 | 0.3619616 | 0.006265 |
| cg22935533 | chr4 | Open Sea    | 0.542386088 | 0.89903974  | 0.3566537 | 2.4E-07  |
| cg06034336 | chr4 | Open Sea    | 0.503182097 | 0.858311061 | 0.355129  | 0.003099 |
| cg17895446 | chr4 | Open Sea    | 0.398018862 | 0.747949471 | 0.3499306 | 0.04925  |
| cg12845923 | chr4 | Open Sea    | 0.483932025 | 0.831627202 | 0.3476952 | 0.026854 |
| cg19843540 | chr4 | Open Sea    | 0.551683937 | 0.896837627 | 0.3451537 | 4.59E-08 |
| cg06691616 | chr4 | Open Sea    | 0.386579392 | 0.729083323 | 0.3425039 | 0.015508 |
| cg02210887 | chr4 | North Shore | 0.576760011 | 0.918987213 | 0.3422272 | 2.37E-07 |
| cg06562964 | chr4 | North Shore | 0.577551406 | 0.91788027  | 0.3403289 | 2.9E-08  |
| cg09317128 | chr4 | South Shelf | 0.249636125 | 0.588609464 | 0.3389733 | 0.003803 |
| cg18098498 | chr4 | Open Sea    | 0.529530282 | 0.864494709 | 0.3349644 | 0.000554 |
| cg23651495 | chr4 | Open Sea    | 0.282012154 | 0.616796011 | 0.3347839 | 0.018968 |
| cg00372132 | chr4 | Open Sea    | 0.603712505 | 0.936359462 | 0.332647  | 4.76E-07 |
| cg14599380 | chr4 | Open Sea    | 0.450594728 | 0.782751123 | 0.3321564 | 2.82E-05 |

|            |      |             |             |             |           |          |
|------------|------|-------------|-------------|-------------|-----------|----------|
| cg10099813 | chr4 | Open Sea    | 0.565001827 | 0.896866063 | 0.3318642 | 3.07E-08 |
| cg14865309 | chr4 | South Shore | 0.525001944 | 0.852543016 | 0.3275411 | 0.00019  |
| cg01238639 | chr4 | North Shore | 0.385338287 | 0.712145787 | 0.3268075 | 0.00517  |
| cg20168495 | chr4 | Open Sea    | 0.343093202 | 0.663371532 | 0.3202783 | 0.017124 |
| cg13662778 | chr4 | Open Sea    | 0.477749047 | 0.792974745 | 0.3152257 | 0.034896 |
| cg18329797 | chr4 | Open Sea    | 0.55270819  | 0.865005351 | 0.3122972 | 3.11E-06 |
| cg00892999 | chr4 | North Shore | 0.542587541 | 0.854777583 | 0.31219   | 0.0292   |
| cg01593385 | chr4 | Open Sea    | 0.478200558 | 0.789474964 | 0.3112744 | 3.26E-05 |
| cg24770408 | chr4 | Open Sea    | 0.4003603   | 0.710565625 | 0.3102053 | 2.72E-06 |
| cg03815116 | chr4 | Open Sea    | 0.545332614 | 0.854578837 | 0.3092462 | 0.000304 |
| cg10104674 | chr4 | Open Sea    | 0.476375099 | 0.78451965  | 0.3081446 | 0.007201 |
| cg02060919 | chr4 | Open Sea    | 0.462600561 | 0.770590641 | 0.3079901 | 1.61E-05 |
| cg05679403 | chr4 | Open Sea    | 0.50506559  | 0.812650379 | 0.3075848 | 0.000344 |
| cg21924472 | chr4 | Open Sea    | 0.496381452 | 0.798613646 | 0.3022322 | 1.64E-06 |
| cg24221738 | chr4 | North Shelf | 0.5270607   | 0.828615921 | 0.3015552 | 0.023725 |
| cg17933300 | chr4 | South Shelf | 0.569279385 | 0.870460923 | 0.3011815 | 0.007016 |
| cg13137032 | chr4 | Open Sea    | 0.533870846 | 0.834840732 | 0.3009699 | 0.02089  |
| cg25889581 | chr4 | Open Sea    | 0.526293191 | 0.826735577 | 0.3004424 | 0.000986 |
| cg01716296 | chr4 | Open Sea    | 0.546281344 | 0.846000234 | 0.2997189 | 6.47E-05 |
| cg18348318 | chr4 | Open Sea    | 0.554829082 | 0.852693645 | 0.2978646 | 0.023746 |
| cg10009737 | chr4 | South Shelf | 0.610167221 | 0.90756298  | 0.2973958 | 2.21E-06 |
| cg00899463 | chr4 | Open Sea    | 0.616470442 | 0.91357743  | 0.297107  | 6.95E-06 |
| cg23452220 | chr4 | Open Sea    | 0.462180985 | 0.75747073  | 0.2952897 | 0.001004 |
| cg10272520 | chr4 | South Shore | 0.658748245 | 0.951103752 | 0.2923555 | 1.62E-05 |
| cg08453458 | chr4 | Open Sea    | 0.502332767 | 0.794172781 | 0.29184   | 0.024935 |
| cg12927785 | chr4 | Open Sea    | 0.600219457 | 0.890612116 | 0.2903927 | 9.33E-06 |
| cg03095982 | chr4 | North Shore | 0.572785496 | 0.862222603 | 0.2894371 | 7.92E-06 |
| cg06663149 | chr4 | Open Sea    | 0.578627998 | 0.864706699 | 0.2860787 | 0.000486 |
| cg00741986 | chr4 | Open Sea    | 0.313692602 | 0.599225336 | 0.2855327 | 1.46E-09 |
| cg06672272 | chr4 | North Shore | 0.5977241   | 0.88321881  | 0.2854947 | 2E-05    |
| cg08684581 | chr4 | Open Sea    | 0.589770211 | 0.875151782 | 0.2853816 | 2.92E-05 |
| cg18317694 | chr4 | South Shore | 0.47817273  | 0.763016971 | 0.2848442 | 0.000897 |
| cg16777106 | chr4 | Open Sea    | 0.653799202 | 0.938061606 | 0.2842624 | 5.62E-07 |
| cg25855592 | chr4 | South Shore | 0.631036119 | 0.913562321 | 0.2825262 | 2.42E-05 |
| cg05626927 | chr4 | Open Sea    | 0.46123042  | 0.742480998 | 0.2812506 | 0.006687 |
| cg19781450 | chr4 | Open Sea    | 0.608837814 | 0.889990882 | 0.2811531 | 9.99E-05 |
| cg17840047 | chr4 | Open Sea    | 0.623175206 | 0.903802252 | 0.280627  | 5.15E-06 |
| cg27212428 | chr4 | Open Sea    | 0.589908197 | 0.87024819  | 0.28034   | 1.91E-05 |
| cg14885038 | chr4 | Open Sea    | 0.554765132 | 0.833679943 | 0.2789148 | 0.000676 |
| cg22506801 | chr4 | Open Sea    | 0.565124205 | 0.844008888 | 0.2788847 | 0.001083 |
| cg09301559 | chr4 | Open Sea    | 0.595245085 | 0.873716532 | 0.2784714 | 4.95E-05 |
| cg21593015 | chr4 | Open Sea    | 0.581229276 | 0.859626263 | 0.278397  | 0.012827 |
| cg16581308 | chr4 | Open Sea    | 0.575360591 | 0.852860696 | 0.2775001 | 0.00769  |
| cg26640927 | chr4 | Open Sea    | 0.389334353 | 0.666366974 | 0.2770326 | 0.010717 |
| cg02708121 | chr4 | Open Sea    | 0.597516066 | 0.873422874 | 0.2759068 | 0.003485 |
| cg22548714 | chr4 | Island      | 0.58882947  | 0.863999177 | 0.2751697 | 0.002402 |
| cg20312457 | chr4 | Open Sea    | 0.636188713 | 0.909974626 | 0.2737859 | 8.09E-07 |
| cg01870330 | chr4 | Island      | 0.662502582 | 0.935228164 | 0.2727256 | 9.61E-06 |
| cg17512904 | chr4 | North Shelf | 0.565152075 | 0.837246845 | 0.2720948 | 0.019565 |
| cg22779039 | chr4 | South Shelf | 0.598497156 | 0.870397475 | 0.2719003 | 0.000938 |



|            |      |             |             |             |           |          |
|------------|------|-------------|-------------|-------------|-----------|----------|
| cg23831864 | chr4 | Open Sea    | 0.609404818 | 0.881233333 | 0.2718285 | 0.000272 |
| cg04416151 | chr4 | Open Sea    | 0.578582427 | 0.850301689 | 0.2717193 | 3.05E-05 |
| cg03155767 | chr4 | Open Sea    | 0.567030881 | 0.834668044 | 0.2676372 | 1.04E-05 |
| cg09102610 | chr4 | Open Sea    | 0.519701322 | 0.786557895 | 0.2668566 | 0.046921 |
| cg14010852 | chr4 | Open Sea    | 0.448153244 | 0.714893182 | 0.2667399 | 0.000961 |
| cg20926939 | chr4 | Open Sea    | 0.605484529 | 0.867996002 | 0.2625115 | 0.00106  |
| cg11268590 | chr4 | North Shelf | 0.667321614 | 0.927870652 | 0.260549  | 0.000202 |
| cg15811435 | chr4 | Open Sea    | 0.604972677 | 0.865278586 | 0.2603059 | 8.15E-05 |
| cg03473809 | chr4 | Open Sea    | 0.560338314 | 0.818579123 | 0.2582408 | 0.000264 |
| cg06888387 | chr4 | North Shelf | 0.620390735 | 0.878173041 | 0.2577823 | 0.00025  |
| cg05434397 | chr4 | Open Sea    | 0.595141129 | 0.852375713 | 0.2572346 | 1.91E-05 |
| cg08635822 | chr4 | Open Sea    | 0.620140048 | 0.87536017  | 0.2552201 | 0.005334 |
| cg14832661 | chr4 | North Shore | 0.617174261 | 0.871696753 | 0.2545225 | 0.001627 |
| cg05132150 | chr4 | Open Sea    | 0.484232784 | 0.738373132 | 0.2541403 | 2.46E-05 |
| cg24952240 | chr4 | Open Sea    | 0.60655484  | 0.860654018 | 0.2540992 | 0.027919 |
| cg06634441 | chr4 | Open Sea    | 0.471718448 | 0.72476462  | 0.2530462 | 0.017498 |
| cg15650745 | chr4 | Open Sea    | 0.567101608 | 0.81985989  | 0.2527583 | 0.002327 |
| cg02378063 | chr4 | Open Sea    | 0.54255963  | 0.794979845 | 0.2524202 | 0.002783 |
| cg24720242 | chr4 | Open Sea    | 0.501945323 | 0.752943787 | 0.2509985 | 0.003763 |
| cg04477404 | chr4 | Open Sea    | 0.653024712 | 0.903661185 | 0.2506365 | 7.81E-06 |
| cg20934839 | chr4 | Open Sea    | 0.495775781 | 0.74572884  | 0.2499531 | 0.000593 |
| cg05685643 | chr4 | Open Sea    | 0.612448516 | 0.861337675 | 0.2488892 | 0.00207  |
| cg17282466 | chr4 | North Shore | 0.522439231 | 0.770875042 | 0.2484358 | 2.66E-05 |
| cg01807825 | chr4 | Open Sea    | 0.498069913 | 0.746389366 | 0.2483195 | 8.28E-05 |
| cg04943241 | chr4 | South Shelf | 0.434932919 | 0.681579091 | 0.2466462 | 2.41E-05 |
| cg24520479 | chr4 | Open Sea    | 0.485676295 | 0.732013285 | 0.246337  | 1.55E-05 |
| cg22520372 | chr4 | Open Sea    | 0.56864202  | 0.81472856  | 0.2460865 | 0.000123 |
| cg21707633 | chr4 | Open Sea    | 0.473074172 | 0.719079869 | 0.2460057 | 0.005126 |
| cg12827188 | chr4 | Open Sea    | 0.542909444 | 0.788420327 | 0.2455109 | 0.018753 |
| cg07079724 | chr4 | Island      | 0.49553617  | 0.739358004 | 0.2438218 | 0.025617 |
| cg27399031 | chr4 | Open Sea    | 0.639177659 | 0.882371378 | 0.2431937 | 0.00034  |
| cg23862925 | chr4 | North Shore | 0.576426054 | 0.819535889 | 0.2431098 | 0.001048 |
| cg24813857 | chr4 | Open Sea    | 0.414217679 | 0.655739862 | 0.2415222 | 3.01E-07 |
| cg02186027 | chr4 | South Shore | 0.636967947 | 0.878313296 | 0.2413453 | 2.75E-05 |
| cg05883128 | chr4 | North Shore | 0.421188877 | 0.662231392 | 0.2410425 | 0.005509 |
| cg14948804 | chr4 | Open Sea    | 0.527111775 | 0.768136287 | 0.2410245 | 2.53E-05 |
| cg09959931 | chr4 | North Shelf | 0.517082345 | 0.756689313 | 0.239607  | 0.000853 |
| cg02622782 | chr4 | Open Sea    | 0.683988255 | 0.923302735 | 0.2393145 | 5.93E-05 |
| cg21304234 | chr4 | North Shelf | 0.614461221 | 0.853124272 | 0.2386631 | 0.000379 |
| cg21599081 | chr4 | North Shelf | 0.513196349 | 0.751777344 | 0.238581  | 9.75E-05 |
| cg05970547 | chr4 | Open Sea    | 0.650753479 | 0.889137763 | 0.2383843 | 0.000158 |
| cg23793336 | chr4 | Open Sea    | 0.592593772 | 0.830955283 | 0.2383615 | 0.033057 |
| cg07630816 | chr4 | Open Sea    | 0.600595367 | 0.838667848 | 0.2380725 | 0.000749 |
| cg15128905 | chr4 | North Shelf | 0.57401572  | 0.812065041 | 0.2380493 | 0.000229 |
| cg05511148 | chr4 | Open Sea    | 0.464903214 | 0.702861814 | 0.2379586 | 0.017762 |
| cg03447013 | chr4 | Open Sea    | 0.420406604 | 0.658331591 | 0.237925  | 3.32E-05 |
| cg21716061 | chr4 | North Shore | 0.518354563 | 0.755991726 | 0.2376372 | 1.73E-05 |
| cg12027135 | chr4 | South Shelf | 0.64125275  | 0.878484813 | 0.2372321 | 0.005392 |
| cg11570011 | chr4 | North Shore | 0.610946669 | 0.848150219 | 0.2372035 | 0.049942 |
| cg15205559 | chr4 | Open Sea    | 0.595439312 | 0.832158567 | 0.2367193 | 0.008121 |

|            |      |             |             |             |           |          |
|------------|------|-------------|-------------|-------------|-----------|----------|
| cg03193847 | chr4 | Open Sea    | 0.596146788 | 0.831934224 | 0.2357874 | 0.000459 |
| cg12404294 | chr4 | Open Sea    | 0.45654407  | 0.690708097 | 0.234164  | 0.001243 |
| cg23845377 | chr4 | Open Sea    | 0.702651925 | 0.936459828 | 0.2338079 | 0.000211 |
| cg21878599 | chr4 | Open Sea    | 0.644172068 | 0.877570875 | 0.2333988 | 0.000688 |
| cg10469791 | chr4 | Open Sea    | 0.333849289 | 0.567227237 | 0.2333779 | 0.035807 |
| cg26131315 | chr4 | Open Sea    | 0.690094855 | 0.922089158 | 0.2319943 | 0.000321 |
| cg00585621 | chr4 | North Shore | 0.357044138 | 0.587647627 | 0.2306035 | 0.024349 |
| cg22325673 | chr4 | North Shelf | 0.390082528 | 0.620182321 | 0.2300998 | 0.00509  |
| cg20856030 | chr4 | Open Sea    | 0.670211943 | 0.899626938 | 0.229415  | 0.000364 |
| cg18531779 | chr4 | Open Sea    | 0.660897914 | 0.889989534 | 0.2290916 | 0.001565 |
| cg13778078 | chr4 | North Shore | 0.577494951 | 0.805987046 | 0.2284921 | 0.045459 |
| cg10657250 | chr4 | Open Sea    | 0.618144114 | 0.846055023 | 0.2279109 | 0.003425 |
| cg16298202 | chr4 | Open Sea    | 0.603914889 | 0.831435851 | 0.227521  | 0.007348 |
| cg21464289 | chr4 | North Shelf | 0.549646217 | 0.776274421 | 0.2266282 | 0.000457 |
| cg18953078 | chr4 | Open Sea    | 0.710917974 | 0.937377272 | 0.2264593 | 0.000106 |
| cg00499159 | chr4 | Open Sea    | 0.649780833 | 0.875810777 | 0.2260299 | 0.001421 |
| cg05936283 | chr4 | North Shore | 0.392488894 | 0.618476236 | 0.2259873 | 0.012982 |
| cg05193407 | chr4 | Open Sea    | 0.6233751   | 0.84932979  | 0.2259547 | 0.009001 |
| cg02992596 | chr4 | North Shore | 0.565521352 | 0.790211148 | 0.2246898 | 0.002345 |
| cg24074177 | chr4 | Open Sea    | 0.633153838 | 0.857773261 | 0.2246194 | 0.012499 |
| cg07265588 | chr4 | North Shelf | 0.632098109 | 0.856442474 | 0.2243444 | 0.003902 |
| cg00627361 | chr4 | Open Sea    | 0.580363907 | 0.804626992 | 0.2242631 | 0.003634 |
| cg16510350 | chr4 | Open Sea    | 0.549173524 | 0.77121846  | 0.2220449 | 0.022657 |
| cg21650295 | chr4 | North Shore | 0.734086678 | 0.955781937 | 0.2216953 | 0.000253 |
| cg14771889 | chr4 | South Shore | 0.577081125 | 0.798695638 | 0.2216145 | 0.001891 |
| cg25310097 | chr4 | Open Sea    | 0.531953286 | 0.753444088 | 0.2214908 | 0.011612 |
| cg26114352 | chr4 | Open Sea    | 0.441914074 | 0.663105306 | 0.2211912 | 0.017908 |
| cg13555050 | chr4 | Open Sea    | 0.602807267 | 0.823583001 | 0.2207757 | 0.007717 |
| cg08339159 | chr4 | Open Sea    | 0.654323456 | 0.874893212 | 0.2205698 | 0.00188  |
| cg08914932 | chr4 | Open Sea    | 0.659090547 | 0.878477389 | 0.2193868 | 0.000364 |
| cg17206150 | chr4 | South Shore | 0.489930644 | 0.709206057 | 0.2192754 | 0.002928 |
| cg08574227 | chr4 | South Shore | 0.41864246  | 0.636091271 | 0.2174488 | 0.034545 |
| cg03114584 | chr4 | North Shore | 0.292439284 | 0.509452641 | 0.2170134 | 0.008187 |
| cg01950474 | chr4 | Open Sea    | 0.692827113 | 0.909471105 | 0.216644  | 0.00021  |
| cg08985766 | chr4 | North Shelf | 0.632324671 | 0.848379654 | 0.216055  | 0.006665 |
| cg03204787 | chr4 | Open Sea    | 0.681258694 | 0.897035287 | 0.2157766 | 0.001021 |
| cg19531230 | chr4 | Open Sea    | 0.589335214 | 0.804921373 | 0.2155862 | 0.000391 |
| cg16386945 | chr4 | Open Sea    | 0.691329227 | 0.9069078   | 0.2155786 | 0.000428 |
| cg21331228 | chr4 | South Shore | 0.662940067 | 0.877348105 | 0.214408  | 0.006806 |
| cg09888336 | chr4 | Island      | 0.67061494  | 0.88480589  | 0.2141909 | 5.07E-05 |
| cg10437224 | chr4 | Open Sea    | 0.62145845  | 0.83542268  | 0.2139642 | 0.01591  |
| cg17222000 | chr4 | Open Sea    | 0.53456746  | 0.74772889  | 0.2131614 | 0.000596 |
| cg02204428 | chr4 | South Shelf | 0.640316226 | 0.85316334  | 0.2128471 | 0.035741 |
| cg06676006 | chr4 | South Shelf | 0.69145418  | 0.903868717 | 0.2124145 | 0.017804 |
| cg21794994 | chr4 | Open Sea    | 0.601626776 | 0.813677684 | 0.2120509 | 0.00073  |
| cg12726190 | chr4 | Open Sea    | 0.535191119 | 0.746717301 | 0.2115262 | 0.00108  |
| cg18571451 | chr4 | Open Sea    | 0.695567    | 0.907039429 | 0.2114724 | 0.001119 |
| cg16418329 | chr4 | Open Sea    | 0.655288718 | 0.866703351 | 0.2114146 | 0.000647 |
| cg25575532 | chr4 | Open Sea    | 0.65507175  | 0.866334583 | 0.2112628 | 0.000435 |
| cg08320122 | chr4 | Open Sea    | 0.649872597 | 0.860932767 | 0.2110602 | 0.007239 |

|            |      |             |             |             |           |          |
|------------|------|-------------|-------------|-------------|-----------|----------|
| cg26339943 | chr4 | South Shelf | 0.542400255 | 0.75340963  | 0.2110094 | 0.003852 |
| cg10647739 | chr4 | Open Sea    | 0.683027516 | 0.89398009  | 0.2109526 | 0.001192 |
| cg22461018 | chr4 | Open Sea    | 0.619074235 | 0.829621247 | 0.210547  | 0.001026 |
| cg14834881 | chr4 | Open Sea    | 0.510133596 | 0.720632356 | 0.2104988 | 0.006106 |
| cg05074133 | chr4 | Open Sea    | 0.697190453 | 0.907129411 | 0.209939  | 0.000589 |
| cg00152611 | chr4 | North Shore | 0.646703398 | 0.856081991 | 0.2093786 | 0.049456 |
| cg21556967 | chr4 | South Shelf | 0.381339636 | 0.590516001 | 0.2091764 | 1.62E-05 |
| cg11474135 | chr4 | Open Sea    | 0.63203648  | 0.840626758 | 0.2085903 | 0.00268  |
| cg04570669 | chr4 | Open Sea    | 0.542271459 | 0.750606678 | 0.2083352 | 0.030765 |
| cg25560924 | chr4 | Open Sea    | 0.63626451  | 0.844449472 | 0.208185  | 0.039806 |
| cg13697223 | chr4 | Open Sea    | 0.670364365 | 0.877740702 | 0.2073763 | 0.000281 |
| cg04457051 | chr4 | South Shelf | 0.69379683  | 0.900992952 | 0.2071961 | 0.000694 |
| cg03605454 | chr4 | Open Sea    | 0.65807782  | 0.863885911 | 0.2058081 | 0.000321 |
| cg15480897 | chr4 | South Shore | 0.694673274 | 0.89996092  | 0.2052876 | 0.009745 |
| cg05988291 | chr4 | North Shore | 0.676705726 | 0.881833315 | 0.2051276 | 0.003059 |
| cg18903398 | chr4 | North Shore | 0.565632353 | 0.770111669 | 0.2044793 | 0.001408 |
| cg27190654 | chr4 | Open Sea    | 0.548581243 | 0.753009316 | 0.2044281 | 0.000444 |
| cg09176893 | chr4 | Island      | 0.699323974 | 0.903428988 | 0.204105  | 0.000122 |
| cg17543218 | chr4 | South Shore | 0.705117603 | 0.909203584 | 0.204086  | 0.000462 |
| cg24729498 | chr4 | North Shore | 0.474211299 | 0.678155934 | 0.2039446 | 0.03979  |
| cg02193513 | chr4 | North Shore | 0.549687118 | 0.753424623 | 0.2037375 | 0.028629 |
| cg02513808 | chr4 | Open Sea    | 0.682829886 | 0.885958365 | 0.2031285 | 0.001117 |
| cg01493150 | chr4 | North Shore | 0.469947246 | 0.672007762 | 0.2020605 | 0.001324 |
| cg20510833 | chr4 | Open Sea    | 0.644264107 | 0.845948531 | 0.2016844 | 0.002916 |
| cg11249129 | chr4 | Open Sea    | 0.719920405 | 0.921443102 | 0.2015227 | 0.001239 |
| cg21383592 | chr4 | South Shore | 0.651074285 | 0.852317345 | 0.2012431 | 1.57E-05 |
| cg25555847 | chr4 | South Shelf | 0.508350767 | 0.70885011  | 0.2004993 | 0.000622 |
| cg20848488 | chr4 | Open Sea    | 0.673255874 | 0.873685175 | 0.2004293 | 0.00073  |
| cg17394978 | chr5 | North Shore | 0.285951911 | 0.829303112 | 0.5433512 | 0.033157 |
| cg08596532 | chr5 | Open Sea    | 0.365921825 | 0.892741933 | 0.5268201 | 2.89E-10 |
| cg06592027 | chr5 | Open Sea    | 0.352492625 | 0.873573205 | 0.5210806 | 2.27E-13 |
| cg02485328 | chr5 | North Shore | 0.44429659  | 0.926496571 | 0.4822    | 2.82E-07 |
| cg04003615 | chr5 | Open Sea    | 0.36826168  | 0.830419412 | 0.4621577 | 0.011086 |
| cg08250738 | chr5 | Open Sea    | 0.467093361 | 0.923469193 | 0.4563758 | 2.87E-09 |
| cg15686949 | chr5 | Open Sea    | 0.344832925 | 0.800188152 | 0.4553552 | 0.037789 |
| cg09179916 | chr5 | Open Sea    | 0.409984007 | 0.864832809 | 0.4548488 | 0.005883 |
| cg23514135 | chr5 | North Shore | 0.482558091 | 0.936238792 | 0.4536807 | 1.53E-08 |
| cg09050058 | chr5 | Open Sea    | 0.413318998 | 0.862256107 | 0.4489371 | 0.000213 |
| cg01303236 | chr5 | North Shore | 0.488405079 | 0.932167095 | 0.443762  | 3.9E-08  |
| cg17397548 | chr5 | Open Sea    | 0.385333285 | 0.811890479 | 0.4265572 | 0.03162  |
| cg17566002 | chr5 | Open Sea    | 0.464669265 | 0.889080821 | 0.4244116 | 0.004604 |
| cg06055229 | chr5 | Open Sea    | 0.415643362 | 0.837980499 | 0.4223371 | 7.07E-07 |
| cg10588276 | chr5 | Open Sea    | 0.471158123 | 0.89233805  | 0.4211799 | 1.63E-07 |
| cg07283859 | chr5 | Open Sea    | 0.499773599 | 0.916373725 | 0.4166001 | 8.08E-10 |
| cg02262037 | chr5 | Open Sea    | 0.470176853 | 0.885089868 | 0.414913  | 1.63E-09 |
| cg00346376 | chr5 | North Shore | 0.468252058 | 0.882954907 | 0.4147028 | 0.000803 |
| cg25077823 | chr5 | Open Sea    | 0.521937144 | 0.93424289  | 0.4123057 | 1.72E-08 |
| cg06485308 | chr5 | North Shore | 0.403657507 | 0.815145573 | 0.4114881 | 9.67E-09 |
| cg24903893 | chr5 | North Shore | 0.433349651 | 0.84395068  | 0.410601  | 0.000115 |
| cg16138557 | chr5 | Open Sea    | 0.416380025 | 0.82235548  | 0.4059755 | 0.000475 |

|            |      |             |             |             |           |          |
|------------|------|-------------|-------------|-------------|-----------|----------|
| cg13275603 | chr5 | Open Sea    | 0.151717345 | 0.556506369 | 0.404789  | 0.027726 |
| cg14677130 | chr5 | Open Sea    | 0.39254356  | 0.793181105 | 0.4006375 | 0.021304 |
| cg26720682 | chr5 | Open Sea    | 0.465333251 | 0.86226469  | 0.3969314 | 1.52E-07 |
| cg14500614 | chr5 | Open Sea    | 0.512636981 | 0.907704524 | 0.3950675 | 1.29E-08 |
| cg26816636 | chr5 | North Shelf | 0.383714976 | 0.778525952 | 0.394811  | 0.020819 |
| cg05884053 | chr5 | Open Sea    | 0.375477262 | 0.766470596 | 0.3909933 | 0.042637 |
| cg04232935 | chr5 | South Shelf | 0.465590947 | 0.855505367 | 0.3899144 | 2.69E-08 |
| cg06665485 | chr5 | Open Sea    | 0.53349492  | 0.919506918 | 0.386012  | 2.89E-06 |
| cg23465650 | chr5 | North Shore | 0.56529541  | 0.950408685 | 0.3851133 | 1.57E-08 |
| cg01192077 | chr5 | North Shore | 0.503706232 | 0.886389603 | 0.3826834 | 6.62E-06 |
| cg24189734 | chr5 | North Shore | 0.507965081 | 0.887055385 | 0.3790903 | 0.000117 |
| cg05583171 | chr5 | Open Sea    | 0.5183197   | 0.893814601 | 0.3754949 | 0.001418 |
| cg10519882 | chr5 | North Shelf | 0.511247668 | 0.885455973 | 0.3742083 | 6.93E-05 |
| cg04242070 | chr5 | South Shelf | 0.409442998 | 0.783307705 | 0.3738647 | 0.000376 |
| cg11898646 | chr5 | North Shore | 0.443570227 | 0.813366424 | 0.3697962 | 0.009063 |
| cg15626193 | chr5 | Open Sea    | 0.368587221 | 0.737344093 | 0.3687569 | 8.08E-09 |
| cg09826697 | chr5 | Open Sea    | 0.560048332 | 0.928467067 | 0.3684187 | 9.83E-08 |
| cg01664151 | chr5 | North Shore | 0.465784182 | 0.833297104 | 0.3675129 | 5.21E-06 |
| cg02283238 | chr5 | North Shore | 0.532969007 | 0.900375169 | 0.3674062 | 0.000546 |
| cg10473266 | chr5 | Open Sea    | 0.521751605 | 0.888854691 | 0.3671031 | 6.42E-08 |
| cg02053265 | chr5 | Open Sea    | 0.518106352 | 0.885068264 | 0.3669619 | 5.1E-05  |
| cg10488012 | chr5 | South Shore | 0.460460039 | 0.827403665 | 0.3669436 | 0.003652 |
| cg09050160 | chr5 | North Shore | 0.495068835 | 0.861066588 | 0.3659978 | 0.000329 |
| cg22586996 | chr5 | Island      | 0.308057524 | 0.672937118 | 0.3648796 | 5.12E-08 |
| cg08748308 | chr5 | Open Sea    | 0.376243864 | 0.739420669 | 0.3631768 | 0.035797 |
| cg07721901 | chr5 | Open Sea    | 0.448696714 | 0.811643837 | 0.3629471 | 0.009276 |
| cg15720112 | chr5 | Open Sea    | 0.361736255 | 0.722317854 | 0.3605816 | 0.010441 |
| cg03977174 | chr5 | Open Sea    | 0.550324433 | 0.910158228 | 0.3598338 | 4.96E-06 |
| cg27581493 | chr5 | South Shelf | 0.390673613 | 0.750463997 | 0.3597904 | 1.23E-05 |
| cg04830757 | chr5 | Open Sea    | 0.429910491 | 0.788733638 | 0.3588231 | 0.033155 |
| cg13991631 | chr5 | Open Sea    | 0.529636352 | 0.888459377 | 0.358823  | 0.019093 |
| cg05452391 | chr5 | Open Sea    | 0.474835504 | 0.832616684 | 0.3577812 | 0.039631 |
| cg09500421 | chr5 | North Shelf | 0.570678679 | 0.92504767  | 0.354369  | 2.52E-08 |
| cg21748244 | chr5 | Open Sea    | 0.497261708 | 0.850588617 | 0.3533269 | 0.000276 |
| cg12668403 | chr5 | Open Sea    | 0.463402272 | 0.815254896 | 0.3518526 | 0.029254 |
| cg02419835 | chr5 | North Shore | 0.466148739 | 0.816811959 | 0.3506632 | 0.000124 |
| cg00593008 | chr5 | North Shore | 0.454189476 | 0.804474942 | 0.3502855 | 0.001868 |
| cg24977670 | chr5 | Open Sea    | 0.438405001 | 0.788077232 | 0.3496722 | 4.97E-06 |
| cg11935708 | chr5 | Open Sea    | 0.560086398 | 0.907673745 | 0.3475873 | 1.69E-07 |
| cg02633363 | chr5 | North Shore | 0.456982209 | 0.80422506  | 0.3472429 | 0.007683 |
| cg27312775 | chr5 | Open Sea    | 0.507247676 | 0.850241017 | 0.3429933 | 4.98E-07 |
| cg22212250 | chr5 | Open Sea    | 0.471707134 | 0.814217942 | 0.3425108 | 0.000289 |
| cg15411447 | chr5 | Open Sea    | 0.530141039 | 0.871566779 | 0.3414257 | 0.000265 |
| cg02077216 | chr5 | North Shore | 0.585417207 | 0.92530441  | 0.3398872 | 1.56E-06 |
| cg25148632 | chr5 | North Shelf | 0.520983879 | 0.859782476 | 0.3387986 | 3.55E-06 |
| cg17730402 | chr5 | Open Sea    | 0.579280436 | 0.917757382 | 0.3384769 | 4.65E-08 |
| cg10862399 | chr5 | North Shelf | 0.393660548 | 0.730315201 | 0.3366547 | 6.47E-05 |
| cg01024618 | chr5 | Open Sea    | 0.581854008 | 0.917846634 | 0.3359926 | 1E-07    |
| cg24150325 | chr5 | Open Sea    | 0.510942645 | 0.846104371 | 0.3351617 | 3.04E-06 |
| cg03335624 | chr5 | North Shore | 0.093616778 | 0.427822369 | 0.3342056 | 0.036545 |

|            |      |             |             |             |           |          |
|------------|------|-------------|-------------|-------------|-----------|----------|
| cg12187999 | chr5 | Open Sea    | 0.533429486 | 0.866849914 | 0.3334204 | 0.001743 |
| cg26129110 | chr5 | Open Sea    | 0.538622563 | 0.869490138 | 0.3308676 | 5.88E-07 |
| cg09458096 | chr5 | Open Sea    | 0.579891207 | 0.908923871 | 0.3290327 | 9.42E-08 |
| cg01996004 | chr5 | Open Sea    | 0.473600727 | 0.800778188 | 0.3271775 | 1.49E-08 |
| cg11502673 | chr5 | North Shelf | 0.532368954 | 0.859209516 | 0.3268406 | 1.65E-09 |
| cg21170583 | chr5 | Open Sea    | 0.528996409 | 0.855757906 | 0.3267615 | 1.17E-05 |
| cg16578883 | chr5 | Open Sea    | 0.549253866 | 0.87593671  | 0.3266828 | 2.83E-07 |
| cg26244838 | chr5 | North Shore | 0.539430528 | 0.864608107 | 0.3251776 | 4.52E-05 |
| cg16281600 | chr5 | Open Sea    | 0.316093343 | 0.641104907 | 0.3250116 | 0.049203 |
| cg21201393 | chr5 | Open Sea    | 0.446443456 | 0.770599547 | 0.3241561 | 7.67E-07 |
| cg11605577 | chr5 | Open Sea    | 0.490943889 | 0.814690373 | 0.3237465 | 6.04E-08 |
| cg02198988 | chr5 | North Shore | 0.376880176 | 0.699937296 | 0.3230571 | 0.007963 |
| cg05964600 | chr5 | Open Sea    | 0.485531412 | 0.806625325 | 0.3210939 | 0.006508 |
| cg26655294 | chr5 | Open Sea    | 0.402039668 | 0.71875728  | 0.3167176 | 0.005053 |
| cg17668274 | chr5 | Open Sea    | 0.497434974 | 0.813184771 | 0.3157498 | 0.003129 |
| cg12155028 | chr5 | Open Sea    | 0.524235133 | 0.839818866 | 0.3155837 | 2.3E-06  |
| cg01056615 | chr5 | Open Sea    | 0.470033395 | 0.782876553 | 0.3128432 | 0.000311 |
| cg17431952 | chr5 | Open Sea    | 0.530732421 | 0.842498309 | 0.3117659 | 4.61E-05 |
| cg17987968 | chr5 | Open Sea    | 0.422973328 | 0.734282116 | 0.3113088 | 0.005208 |
| cg24706839 | chr5 | South Shelf | 0.604469512 | 0.915637647 | 0.3111681 | 7.87E-05 |
| cg27605977 | chr5 | Open Sea    | 0.510924873 | 0.820923038 | 0.3099982 | 0.003473 |
| cg25119077 | chr5 | Open Sea    | 0.604737753 | 0.912483084 | 0.3077453 | 1.16E-05 |
| cg01827426 | chr5 | Open Sea    | 0.493851913 | 0.801224471 | 0.3073726 | 5.34E-06 |
| cg03379894 | chr5 | North Shore | 0.561407707 | 0.86770174  | 0.306294  | 0.00069  |
| cg05600609 | chr5 | Open Sea    | 0.521377462 | 0.827572848 | 0.3061954 | 0.016499 |
| cg01214384 | chr5 | Open Sea    | 0.480653862 | 0.785272258 | 0.3046184 | 0.014032 |
| cg25003658 | chr5 | Open Sea    | 0.530020398 | 0.834315844 | 0.3042954 | 0.000894 |
| cg03326188 | chr5 | Open Sea    | 0.456007409 | 0.760029291 | 0.3040219 | 0.034034 |
| cg11677852 | chr5 | Island      | 0.541106501 | 0.844857266 | 0.3037508 | 0.01037  |
| cg16009167 | chr5 | South Shelf | 0.491167386 | 0.794679844 | 0.3035125 | 0.006812 |
| cg11534519 | chr5 | Open Sea    | 0.406451164 | 0.70765295  | 0.3012018 | 0.045738 |
| cg22751627 | chr5 | Open Sea    | 0.49309144  | 0.793746357 | 0.3006549 | 0.003132 |
| cg17522866 | chr5 | Open Sea    | 0.626139954 | 0.926673631 | 0.3005337 | 3.88E-06 |
| cg12156838 | chr5 | North Shore | 0.56283295  | 0.863227725 | 0.3003948 | 0.04398  |
| cg02246916 | chr5 | South Shore | 0.590659885 | 0.890084339 | 0.2994245 | 0.002759 |
| cg05225461 | chr5 | South Shore | 0.42989277  | 0.728609185 | 0.2987164 | 0.047084 |
| cg03914397 | chr5 | Open Sea    | 0.520204763 | 0.818833295 | 0.2986285 | 0.000775 |
| cg22067069 | chr5 | North Shore | 0.522476756 | 0.820368781 | 0.297892  | 4.31E-05 |
| cg14653988 | chr5 | Open Sea    | 0.431635046 | 0.729214018 | 0.297579  | 0.036455 |
| cg22574202 | chr5 | Open Sea    | 0.483313972 | 0.780331832 | 0.2970179 | 0.000279 |
| cg19820287 | chr5 | Open Sea    | 0.364359546 | 0.661359485 | 0.2969999 | 2.55E-06 |
| cg18043514 | chr5 | North Shore | 0.503319119 | 0.800129423 | 0.2968103 | 0.029098 |
| cg12469755 | chr5 | Open Sea    | 0.635921326 | 0.93268753  | 0.2967662 | 0.000579 |
| cg25980539 | chr5 | Open Sea    | 0.518078835 | 0.814412262 | 0.2963334 | 0.034766 |
| cg17871403 | chr5 | Open Sea    | 0.613800984 | 0.909496439 | 0.2956955 | 0.007475 |
| cg07569575 | chr5 | Open Sea    | 0.629922879 | 0.92557255  | 0.2956497 | 9.57E-07 |
| cg22012248 | chr5 | North Shore | 0.483167362 | 0.778700747 | 0.2955334 | 7.55E-06 |
| cg11832309 | chr5 | North Shore | 0.547278127 | 0.842181373 | 0.2949032 | 1.57E-05 |
| cg06622892 | chr5 | Open Sea    | 0.615444866 | 0.909498832 | 0.294054  | 0.000328 |
| cg00934735 | chr5 | Open Sea    | 0.538316943 | 0.831051338 | 0.2927344 | 0.00259  |

|            |      |             |             |             |           |          |
|------------|------|-------------|-------------|-------------|-----------|----------|
| cg19954978 | chr5 | North Shelf | 0.598773673 | 0.890189929 | 0.2914163 | 2.26E-05 |
| cg02597923 | chr5 | North Shelf | 0.557615861 | 0.848809964 | 0.2911941 | 3.66E-05 |
| cg24180759 | chr5 | Open Sea    | 0.589287317 | 0.880105943 | 0.2908186 | 0.010498 |
| cg10435838 | chr5 | Open Sea    | 0.613044556 | 0.903629839 | 0.2905853 | 0.021161 |
| cg11906285 | chr5 | Open Sea    | 0.56672294  | 0.855811279 | 0.2890883 | 7.98E-06 |
| cg24094897 | chr5 | Open Sea    | 0.527238655 | 0.81598725  | 0.2887486 | 0.001132 |
| cg21148923 | chr5 | Open Sea    | 0.447919731 | 0.735455227 | 0.2875355 | 2.58E-05 |
| cg00401456 | chr5 | Open Sea    | 0.645264347 | 0.932014347 | 0.28675   | 1.01E-05 |
| cg07392358 | chr5 | Open Sea    | 0.531283366 | 0.817979883 | 0.2866965 | 2.3E-06  |
| cg14616369 | chr5 | North Shore | 0.641893249 | 0.928379125 | 0.2864859 | 4.05E-05 |
| cg08768395 | chr5 | North Shelf | 0.534170409 | 0.820396813 | 0.2862264 | 6.9E-05  |
| cg22135561 | chr5 | Open Sea    | 0.54406514  | 0.829703875 | 0.2856387 | 7.73E-06 |
| cg26643914 | chr5 | Open Sea    | 0.529327608 | 0.814707674 | 0.2853801 | 0.002931 |
| cg18443559 | chr5 | Open Sea    | 0.52248518  | 0.807347042 | 0.2848619 | 0.014144 |
| cg15651267 | chr5 | Open Sea    | 0.505243708 | 0.788884449 | 0.2836407 | 0.000266 |
| cg06550986 | chr5 | Open Sea    | 0.593224719 | 0.876792709 | 0.283568  | 1.09E-05 |
| cg06046805 | chr5 | Open Sea    | 0.57145877  | 0.854856161 | 0.2833974 | 0.00047  |
| cg27361847 | chr5 | North Shore | 0.42374731  | 0.706753009 | 0.2830057 | 0.000559 |
| cg16106903 | chr5 | Open Sea    | 0.648303689 | 0.931307166 | 0.2830035 | 3.43E-05 |
| cg25503410 | chr5 | Open Sea    | 0.627757792 | 0.910644928 | 0.2828871 | 6.53E-06 |
| cg08513547 | chr5 | North Shelf | 0.575656149 | 0.858261491 | 0.2826053 | 0.00054  |
| cg17788013 | chr5 | Open Sea    | 0.52360922  | 0.804252284 | 0.2806431 | 0.008022 |
| cg06728135 | chr5 | Open Sea    | 0.225536057 | 0.50483885  | 0.2793028 | 0.0095   |
| cg06736134 | chr5 | Open Sea    | 0.628683534 | 0.906793432 | 0.2781099 | 2.18E-05 |
| cg27640528 | chr5 | South Shelf | 0.424142994 | 0.7008394   | 0.2766964 | 3.38E-06 |
| cg18378419 | chr5 | Open Sea    | 0.633347067 | 0.909687436 | 0.2763404 | 0.00011  |
| cg17266805 | chr5 | Open Sea    | 0.447593532 | 0.722826101 | 0.2752326 | 0.000187 |
| cg24736935 | chr5 | South Shore | 0.578877685 | 0.853890769 | 0.2750131 | 0.019897 |
| cg24874191 | chr5 | Open Sea    | 0.576436297 | 0.851056832 | 0.2746205 | 0.009581 |
| cg25550425 | chr5 | Open Sea    | 0.646187218 | 0.920749112 | 0.2745619 | 9.58E-05 |
| cg09181015 | chr5 | Open Sea    | 0.50667037  | 0.781083131 | 0.2744128 | 5.25E-05 |
| cg15207662 | chr5 | Open Sea    | 0.56942397  | 0.843630422 | 0.2742065 | 5.34E-06 |
| cg17425484 | chr5 | Open Sea    | 0.429859298 | 0.703690372 | 0.2738311 | 0.011062 |
| cg25147941 | chr5 | Open Sea    | 0.524488665 | 0.797941086 | 0.2734524 | 0.013073 |
| cg24585422 | chr5 | Open Sea    | 0.470088096 | 0.74270995  | 0.2726219 | 1.92E-08 |
| cg01572434 | chr5 | Open Sea    | 0.550427176 | 0.822770982 | 0.2723438 | 0.013689 |
| cg22495322 | chr5 | Open Sea    | 0.583529722 | 0.855362425 | 0.2718327 | 0.000115 |
| cg09172244 | chr5 | Open Sea    | 0.51559418  | 0.787246452 | 0.2716523 | 0.038202 |
| cg08612059 | chr5 | Open Sea    | 0.553209405 | 0.824259513 | 0.2710501 | 0.014168 |
| cg26341848 | chr5 | Open Sea    | 0.569590589 | 0.84038938  | 0.2707988 | 0.002019 |
| cg21137557 | chr5 | Open Sea    | 0.577508261 | 0.847718094 | 0.2702098 | 0.017371 |
| cg21242232 | chr5 | South Shelf | 0.541280043 | 0.811341976 | 0.2700619 | 0.041885 |
| cg04638205 | chr5 | Open Sea    | 0.592331832 | 0.861221162 | 0.2688893 | 0.009269 |
| cg02047286 | chr5 | North Shore | 0.568326087 | 0.836811139 | 0.2684851 | 0.002122 |
| cg14480222 | chr5 | Open Sea    | 0.578009129 | 0.8463502   | 0.2683411 | 2.73E-05 |
| cg06507590 | chr5 | Open Sea    | 0.595076116 | 0.863218485 | 0.2681424 | 5.82E-06 |
| cg26488405 | chr5 | North Shore | 0.423595171 | 0.691568032 | 0.2679729 | 1.21E-05 |
| cg18096251 | chr5 | Open Sea    | 0.539921464 | 0.807219471 | 0.267298  | 0.000911 |
| cg26941476 | chr5 | Open Sea    | 0.459666492 | 0.726394588 | 0.2667281 | 1.24E-07 |
| cg24935345 | chr5 | Open Sea    | 0.592146776 | 0.857985964 | 0.2658392 | 0.000219 |

|            |      |             |             |             |           |          |
|------------|------|-------------|-------------|-------------|-----------|----------|
| cg05031448 | chr5 | Open Sea    | 0.455371213 | 0.721087213 | 0.265716  | 0.004635 |
| cg02381009 | chr5 | North Shore | 0.650072257 | 0.915287748 | 0.2652155 | 4.55E-05 |
| cg02318282 | chr5 | Open Sea    | 0.625680533 | 0.890879791 | 0.2651993 | 8.7E-06  |
| cg01015395 | chr5 | Open Sea    | 0.575905903 | 0.840531079 | 0.2646252 | 0.045619 |
| cg23960088 | chr5 | North Shore | 0.51944516  | 0.784014734 | 0.2645696 | 0.013361 |
| cg10501454 | chr5 | North Shelf | 0.589234038 | 0.853469129 | 0.2642351 | 1.79E-05 |
| cg13945749 | chr5 | North Shore | 0.596625957 | 0.860698005 | 0.264072  | 0.00145  |
| cg11585952 | chr5 | Open Sea    | 0.565484851 | 0.829350384 | 0.2638655 | 0.009419 |
| cg18748085 | chr5 | Open Sea    | 0.559499516 | 0.823218683 | 0.2637192 | 0.005974 |
| cg02599587 | chr5 | Open Sea    | 0.625945884 | 0.889368868 | 0.263423  | 0.001632 |
| cg05291677 | chr5 | North Shore | 0.624368459 | 0.887411038 | 0.2630426 | 0.000704 |
| cg09562675 | chr5 | North Shore | 0.474583097 | 0.737132472 | 0.2625494 | 7.17E-05 |
| cg02109704 | chr5 | North Shelf | 0.391536869 | 0.653485043 | 0.2619482 | 1.31E-05 |
| cg26216724 | chr5 | South Shelf | 0.272610204 | 0.534079793 | 0.2614696 | 0.01504  |
| cg12524168 | chr5 | Open Sea    | 0.574795353 | 0.835443283 | 0.2606479 | 2.92E-05 |
| cg08701543 | chr5 | North Shelf | 0.596484819 | 0.856927714 | 0.2604429 | 1.09E-05 |
| cg04712635 | chr5 | Open Sea    | 0.584242083 | 0.844418596 | 0.2601765 | 4.11E-06 |
| cg06777750 | chr5 | North Shore | 0.444084381 | 0.704115654 | 0.2600313 | 0.000143 |
| cg11590974 | chr5 | Open Sea    | 0.506142053 | 0.76571757  | 0.2595755 | 0.02931  |
| cg03989749 | chr5 | Open Sea    | 0.525839211 | 0.7853878   | 0.2595486 | 0.00315  |
| cg16679297 | chr5 | Open Sea    | 0.54000339  | 0.798506881 | 0.2585035 | 0.034964 |
| cg16373535 | chr5 | Open Sea    | 0.636233008 | 0.894590364 | 0.2583574 | 0.000159 |
| cg22839587 | chr5 | Open Sea    | 0.665482755 | 0.923251138 | 0.2577684 | 0.000123 |
| cg26881360 | chr5 | Open Sea    | 0.654372444 | 0.912131102 | 0.2577587 | 0.000114 |
| cg16653901 | chr5 | South Shore | 0.344633938 | 0.602063821 | 0.2574299 | 0.040467 |
| cg23010035 | chr5 | Open Sea    | 0.466944745 | 0.723412889 | 0.2564681 | 0.000306 |
| cg00111629 | chr5 | South Shore | 0.491218129 | 0.747355466 | 0.2561373 | 6.44E-06 |
| cg22203867 | chr5 | Open Sea    | 0.666568618 | 0.921776962 | 0.2552083 | 3.58E-05 |
| cg19102120 | chr5 | Open Sea    | 0.66691412  | 0.921994993 | 0.2550809 | 2.55E-05 |
| cg25233208 | chr5 | North Shelf | 0.633737423 | 0.888170585 | 0.2544332 | 0.000274 |
| cg16413715 | chr5 | Island      | 0.597106003 | 0.851516572 | 0.2544106 | 0.005693 |
| cg02379427 | chr5 | Open Sea    | 0.616753544 | 0.871111876 | 0.2543583 | 0.006908 |
| cg08762472 | chr5 | Open Sea    | 0.473587742 | 0.72770897  | 0.2541212 | 0.018517 |
| cg27038382 | chr5 | Open Sea    | 0.429040125 | 0.683069286 | 0.2540292 | 0.001242 |
| cg15375424 | chr5 | North Shelf | 0.659932943 | 0.913831404 | 0.2538985 | 6.9E-05  |
| cg01229506 | chr5 | Open Sea    | 0.587642202 | 0.841023364 | 0.2533812 | 6.58E-05 |
| cg15813594 | chr5 | Open Sea    | 0.42710866  | 0.680438405 | 0.2533297 | 0.022994 |
| cg03642555 | chr5 | Open Sea    | 0.577080524 | 0.830399528 | 0.253319  | 2.94E-06 |
| cg17604429 | chr5 | Open Sea    | 0.654681084 | 0.907847724 | 0.2531666 | 0.000255 |
| cg04188241 | chr5 | Open Sea    | 0.437049272 | 0.690211944 | 0.2531627 | 0.000127 |
| cg02716128 | chr5 | Open Sea    | 0.584101998 | 0.837114054 | 0.2530121 | 0.006164 |
| cg01027405 | chr5 | Open Sea    | 0.571272763 | 0.824266605 | 0.2529938 | 0.007461 |
| cg18358845 | chr5 | Open Sea    | 0.670966356 | 0.923913178 | 0.2529468 | 0.00015  |
| cg23346625 | chr5 | Open Sea    | 0.621432639 | 0.874160272 | 0.2527276 | 0.00197  |
| cg09735390 | chr5 | Open Sea    | 0.602259264 | 0.854673827 | 0.2524146 | 0.037296 |
| cg00089966 | chr5 | North Shelf | 0.406395389 | 0.658542696 | 0.2521473 | 0.001715 |
| cg15999077 | chr5 | Open Sea    | 0.427751601 | 0.679510915 | 0.2517593 | 0.010562 |
| cg11553311 | chr5 | Open Sea    | 0.383201185 | 0.634511597 | 0.2513104 | 0.010196 |
| cg01845501 | chr5 | Open Sea    | 0.533838475 | 0.784124205 | 0.2502857 | 0.000573 |
| cg11584519 | chr5 | North Shelf | 0.434708775 | 0.684810419 | 0.2501016 | 0.007962 |

|            |      |             |             |             |           |          |
|------------|------|-------------|-------------|-------------|-----------|----------|
| cg02480397 | chr5 | Open Sea    | 0.626200357 | 0.876028847 | 0.2498285 | 0.00026  |
| cg08442713 | chr5 | Open Sea    | 0.516295874 | 0.765708976 | 0.2494131 | 0.001964 |
| cg04828158 | chr5 | Open Sea    | 0.611844963 | 0.861154548 | 0.2493096 | 0.000176 |
| cg18157012 | chr5 | Open Sea    | 0.625066463 | 0.874053266 | 0.2489868 | 0.017042 |
| cg06742021 | chr5 | Open Sea    | 0.42837143  | 0.676723319 | 0.2483519 | 0.000966 |
| cg04479041 | chr5 | Open Sea    | 0.589387468 | 0.8375176   | 0.2481301 | 0.001357 |
| cg16199460 | chr5 | Open Sea    | 0.385176668 | 0.633142909 | 0.2479662 | 0.026286 |
| cg13621378 | chr5 | Open Sea    | 0.501010225 | 0.748485112 | 0.2474749 | 0.000162 |
| cg22203607 | chr5 | Open Sea    | 0.604942007 | 0.851530023 | 0.246588  | 1.5E-05  |
| cg26893743 | chr5 | Open Sea    | 0.603374173 | 0.849408765 | 0.2460346 | 4.73E-07 |
| cg10501621 | chr5 | Open Sea    | 0.639119736 | 0.885138121 | 0.2460184 | 0.016563 |
| cg21209315 | chr5 | Open Sea    | 0.463708922 | 0.709463663 | 0.2457547 | 0.000467 |
| cg08888918 | chr5 | Open Sea    | 0.675465293 | 0.92096555  | 0.2455003 | 9.42E-05 |
| cg10166825 | chr5 | Open Sea    | 0.642586457 | 0.887913978 | 0.2453275 | 7.7E-05  |
| cg11483884 | chr5 | North Shore | 0.649798831 | 0.89510248  | 0.2453036 | 0.000162 |
| cg22631387 | chr5 | Open Sea    | 0.612028322 | 0.856550051 | 0.2445217 | 0.001226 |
| cg26645468 | chr5 | North Shore | 0.623649979 | 0.868160965 | 0.244511  | 0.009034 |
| cg06871919 | chr5 | Open Sea    | 0.552180208 | 0.796551517 | 0.2443713 | 0.044144 |
| cg06469229 | chr5 | North Shore | 0.111393319 | 0.355726047 | 0.2443327 | 0.041195 |
| cg01921382 | chr5 | North Shore | 0.509668501 | 0.753641733 | 0.2439732 | 4.26E-06 |
| cg19421752 | chr5 | North Shore | 0.528949837 | 0.772725554 | 0.2437757 | 0.000192 |
| cg16425489 | chr5 | Open Sea    | 0.626119944 | 0.869530538 | 0.2434106 | 6.79E-05 |
| cg12807946 | chr5 | South Shore | 0.647355583 | 0.890091753 | 0.2427362 | 0.000299 |
| cg15646543 | chr5 | Open Sea    | 0.410730696 | 0.653007417 | 0.2422767 | 2.3E-06  |
| cg26986989 | chr5 | Open Sea    | 0.408435114 | 0.649556733 | 0.2411216 | 0.00042  |
| cg00894352 | chr5 | North Shore | 0.48372725  | 0.724805695 | 0.2410784 | 1.38E-05 |
| cg08437132 | chr5 | Open Sea    | 0.612108545 | 0.853170842 | 0.2410623 | 0.029492 |
| cg07213685 | chr5 | Open Sea    | 0.427780144 | 0.668687047 | 0.2409069 | 0.001611 |
| cg17321888 | chr5 | South Shelf | 0.56784336  | 0.806357714 | 0.2385144 | 7.59E-05 |
| cg07391392 | chr5 | Open Sea    | 0.647563368 | 0.886058054 | 0.2384947 | 0.000116 |
| cg12509424 | chr5 | Open Sea    | 0.666961755 | 0.905002717 | 0.238041  | 1.02E-05 |
| cg03670994 | chr5 | Open Sea    | 0.522958665 | 0.760944117 | 0.2379855 | 0.017521 |
| cg14844815 | chr5 | Open Sea    | 0.59486132  | 0.832129621 | 0.2372683 | 0.006176 |
| cg00025405 | chr5 | North Shore | 0.550031804 | 0.786063389 | 0.2360316 | 0.001079 |
| cg17979970 | chr5 | Open Sea    | 0.391052719 | 0.626637677 | 0.235585  | 0.010739 |
| cg26437203 | chr5 | Open Sea    | 0.198122483 | 0.433395325 | 0.2352728 | 0.036009 |
| cg06563640 | chr5 | North Shore | 0.64838924  | 0.882582763 | 0.2341935 | 0.005387 |
| cg08894020 | chr5 | Open Sea    | 0.292594374 | 0.526546389 | 0.233952  | 0.006193 |
| cg13035416 | chr5 | Open Sea    | 0.609331657 | 0.842196694 | 0.232865  | 4.13E-05 |
| cg10943629 | chr5 | Open Sea    | 0.62907415  | 0.861644319 | 0.2325702 | 0.036324 |
| cg23956317 | chr5 | Open Sea    | 0.651743299 | 0.883915033 | 0.2321717 | 0.000115 |
| cg23154495 | chr5 | South Shelf | 0.538839504 | 0.77080424  | 0.2319647 | 0.000145 |
| cg25395619 | chr5 | South Shore | 0.627457992 | 0.859357387 | 0.2318994 | 0.001466 |
| cg12911095 | chr5 | Open Sea    | 0.638293901 | 0.870150367 | 0.2318565 | 0.002553 |
| cg26902647 | chr5 | South Shore | 0.567548095 | 0.799363374 | 0.2318153 | 0.000936 |
| cg02013527 | chr5 | Open Sea    | 0.54485693  | 0.776433758 | 0.2315768 | 0.024226 |
| cg12385811 | chr5 | Open Sea    | 0.63972811  | 0.871256109 | 0.231528  | 0.001888 |
| cg13291607 | chr5 | Open Sea    | 0.650144897 | 0.881400052 | 0.2312552 | 0.001617 |
| cg13294846 | chr5 | Island      | 0.720652114 | 0.951887908 | 0.2312358 | 0.000102 |
| cg27350428 | chr5 | South Shelf | 0.62270535  | 0.853360245 | 0.2306549 | 0.003144 |



|            |      |             |             |             |           |          |
|------------|------|-------------|-------------|-------------|-----------|----------|
| cg07759903 | chr5 | South Shelf | 0.541175257 | 0.771776109 | 0.2306009 | 0.001094 |
| cg17731547 | chr5 | Open Sea    | 0.627904134 | 0.858201061 | 0.2302969 | 0.019782 |
| cg08323777 | chr5 | Open Sea    | 0.701923709 | 0.932068597 | 0.2301449 | 0.000892 |
| cg07427642 | chr5 | North Shore | 0.453907436 | 0.683747131 | 0.2298397 | 0.041499 |
| cg10873086 | chr5 | Open Sea    | 0.561544226 | 0.790622351 | 0.2290781 | 0.000169 |
| cg14591439 | chr5 | South Shelf | 0.67006337  | 0.899120224 | 0.2290569 | 0.040702 |
| cg26630859 | chr5 | North Shore | 0.614775512 | 0.843282321 | 0.2285068 | 0.000105 |
| cg21554569 | chr5 | Open Sea    | 0.666067564 | 0.894526181 | 0.2284586 | 0.000699 |
| cg25407540 | chr5 | Open Sea    | 0.508307753 | 0.73673545  | 0.2284277 | 0.001989 |
| cg06470558 | chr5 | Open Sea    | 0.296531756 | 0.524706355 | 0.2281746 | 0.006072 |
| cg02095401 | chr5 | Open Sea    | 0.620927225 | 0.848121947 | 0.2271947 | 0.001098 |
| cg14758163 | chr5 | Open Sea    | 0.661282369 | 0.888334136 | 0.2270518 | 0.000184 |
| cg06774087 | chr5 | Open Sea    | 0.447201827 | 0.6741364   | 0.2269346 | 0.0106   |
| cg07575896 | chr5 | North Shore | 0.65522244  | 0.882011792 | 0.2267894 | 0.002748 |
| cg05559381 | chr5 | Open Sea    | 0.601892956 | 0.828406474 | 0.2265135 | 0.019779 |
| cg21555696 | chr5 | Open Sea    | 0.452087439 | 0.678596722 | 0.2265093 | 0.000473 |
| cg17221856 | chr5 | North Shore | 0.660378772 | 0.886701028 | 0.2263223 | 0.002869 |
| cg16492211 | chr5 | Open Sea    | 0.521311793 | 0.74721292  | 0.2259011 | 0.001569 |
| cg11107657 | chr5 | North Shelf | 0.433064699 | 0.658943327 | 0.2258786 | 0.008047 |
| cg24141911 | chr5 | Open Sea    | 0.694851502 | 0.920723316 | 0.2258718 | 6.17E-05 |
| cg12053009 | chr5 | Island      | 0.696704467 | 0.922510384 | 0.2258059 | 0.000427 |
| cg13390570 | chr5 | North Shore | 0.58252677  | 0.807939352 | 0.2254126 | 0.006647 |
| cg02730804 | chr5 | Open Sea    | 0.67695316  | 0.902280387 | 0.2253272 | 0.000661 |
| cg18866586 | chr5 | South Shore | 0.686603349 | 0.911577007 | 0.2249737 | 0.000259 |
| cg25475742 | chr5 | Open Sea    | 0.653341696 | 0.878274434 | 0.2249327 | 0.000141 |
| cg11258494 | chr5 | Open Sea    | 0.668223755 | 0.89269612  | 0.2244724 | 0.002952 |
| cg05011238 | chr5 | Open Sea    | 0.599242556 | 0.823279943 | 0.2240374 | 0.000139 |
| cg10977989 | chr5 | Open Sea    | 0.690230875 | 0.913441237 | 0.2232104 | 0.000403 |
| cg24724630 | chr5 | Open Sea    | 0.455671914 | 0.678112886 | 0.222441  | 0.001208 |
| cg18060742 | chr5 | Open Sea    | 0.680267158 | 0.902452676 | 0.2221855 | 0.002097 |
| cg11007015 | chr5 | Open Sea    | 0.646588946 | 0.86875782  | 0.2221689 | 0.000345 |
| cg02667102 | chr5 | Open Sea    | 0.469734849 | 0.691506603 | 0.2217718 | 0.000127 |
| cg19021412 | chr5 | Open Sea    | 0.54719219  | 0.768962751 | 0.2217706 | 0.000426 |
| cg24114651 | chr5 | South Shore | 0.586025687 | 0.807378332 | 0.2213526 | 0.001001 |
| cg09637885 | chr5 | North Shore | 0.633328737 | 0.854414433 | 0.2210857 | 0.004129 |
| cg19977628 | chr5 | Open Sea    | 0.699584497 | 0.920543745 | 0.2209592 | 0.000435 |
| cg14566081 | chr5 | Open Sea    | 0.698184843 | 0.918782381 | 0.2205975 | 0.000478 |
| cg05008898 | chr5 | South Shore | 0.432622577 | 0.65297926  | 0.2203567 | 0.001491 |
| cg06559864 | chr5 | Open Sea    | 0.669451555 | 0.889037547 | 0.219586  | 0.000754 |
| cg08966706 | chr5 | Open Sea    | 0.693272388 | 0.912138457 | 0.2188661 | 0.000812 |
| cg25079100 | chr5 | North Shore | 0.616570348 | 0.835068227 | 0.2184979 | 0.001937 |
| cg02317738 | chr5 | North Shelf | 0.701784037 | 0.919845961 | 0.2180619 | 0.00018  |
| cg21763482 | chr5 | Open Sea    | 0.62501582  | 0.842929593 | 0.2179138 | 0.003494 |
| cg11823551 | chr5 | Open Sea    | 0.563329037 | 0.78121612  | 0.2178871 | 0.033055 |
| cg07293406 | chr5 | Open Sea    | 0.654392966 | 0.870812678 | 0.2164197 | 0.008872 |
| cg05648914 | chr5 | Open Sea    | 0.543896389 | 0.759491523 | 0.2155951 | 0.025783 |
| cg04208853 | chr5 | South Shelf | 0.691452799 | 0.906965146 | 0.2155123 | 0.003059 |
| cg11301254 | chr5 | South Shore | 0.315128093 | 0.530102505 | 0.2149744 | 0.003464 |
| cg17016847 | chr5 | North Shelf | 0.51253174  | 0.727099594 | 0.2145679 | 5.8E-05  |
| cg25510201 | chr5 | Open Sea    | 0.299761952 | 0.513972125 | 0.2142102 | 0.008437 |

|            |      |             |             |             |           |          |
|------------|------|-------------|-------------|-------------|-----------|----------|
| cg04797496 | chr5 | Open Sea    | 0.673141996 | 0.88710158  | 0.2139596 | 0.018765 |
| cg09677701 | chr5 | North Shelf | 0.691009944 | 0.904889277 | 0.2138793 | 0.001287 |
| cg00737979 | chr5 | Open Sea    | 0.573621275 | 0.787218148 | 0.2135969 | 0.006384 |
| cg05232496 | chr5 | Open Sea    | 0.647287978 | 0.860845031 | 0.2135571 | 0.001082 |
| cg02767634 | chr5 | Open Sea    | 0.484787962 | 0.697645841 | 0.2128579 | 0.010825 |
| cg15029475 | chr5 | Open Sea    | 0.434454767 | 0.647300738 | 0.212846  | 8.31E-05 |
| cg17507751 | chr5 | Open Sea    | 0.620504352 | 0.833234128 | 0.2127298 | 0.014589 |
| cg14988869 | chr5 | South Shore | 0.626435085 | 0.838878611 | 0.2124435 | 0.019518 |
| cg27139941 | chr5 | South Shore | 0.704333933 | 0.916635297 | 0.2123014 | 1.18E-05 |
| cg23136275 | chr5 | South Shelf | 0.673247416 | 0.885492553 | 0.2122451 | 0.000605 |
| cg17311726 | chr5 | South Shore | 0.644504679 | 0.856347439 | 0.2118428 | 0.006552 |
| cg16269532 | chr5 | Open Sea    | 0.694050859 | 0.905493243 | 0.2114424 | 0.000344 |
| cg12940040 | chr5 | Open Sea    | 0.70458203  | 0.915963249 | 0.2113812 | 0.001173 |
| cg21929969 | chr5 | Open Sea    | 0.698886421 | 0.909945187 | 0.2110588 | 0.000213 |
| cg25619717 | chr5 | Open Sea    | 0.696919138 | 0.906985565 | 0.2100664 | 0.000808 |
| cg00294956 | chr5 | Open Sea    | 0.137726074 | 0.347454958 | 0.2097289 | 0.012031 |
| cg11538307 | chr5 | Open Sea    | 0.653685634 | 0.863073511 | 0.2093879 | 0.007269 |
| cg12526614 | chr5 | Open Sea    | 0.547502746 | 0.75687299  | 0.2093702 | 0.00203  |
| cg26611367 | chr5 | Open Sea    | 0.685821758 | 0.895116951 | 0.2092952 | 0.002099 |
| cg00509963 | chr5 | Open Sea    | 0.675294868 | 0.88398098  | 0.2086861 | 0.000422 |
| cg20417024 | chr5 | Open Sea    | 0.726567882 | 0.935204643 | 0.2086368 | 0.001022 |
| cg03665078 | chr5 | North Shore | 0.668986557 | 0.877375064 | 0.2083885 | 5.65E-05 |
| cg21956099 | chr5 | South Shore | 0.632819197 | 0.84076817  | 0.207949  | 0.007281 |
| cg09722236 | chr5 | Open Sea    | 0.693345317 | 0.900965434 | 0.2076201 | 0.001031 |
| cg08367801 | chr5 | South Shore | 0.614965292 | 0.822454037 | 0.2074887 | 0.009125 |
| cg10930289 | chr5 | Island      | 0.688582833 | 0.895950928 | 0.2073681 | 0.000139 |
| cg27318774 | chr5 | Open Sea    | 0.677488197 | 0.884640444 | 0.2071522 | 0.000581 |
| cg09101894 | chr5 | North Shore | 0.661596065 | 0.86846025  | 0.2068642 | 0.006825 |
| cg10789601 | chr5 | Open Sea    | 0.665514644 | 0.872289783 | 0.2067751 | 8.97E-05 |
| cg20926282 | chr5 | Open Sea    | 0.671470338 | 0.878087767 | 0.2066174 | 0.011796 |
| cg16300556 | chr5 | South Shelf | 0.687123036 | 0.893717156 | 0.2065941 | 0.004025 |
| cg09062288 | chr5 | North Shelf | 0.675413855 | 0.881938389 | 0.2065245 | 1.78E-06 |
| cg23175023 | chr5 | North Shore | 0.486513453 | 0.692722324 | 0.2062089 | 0.000546 |
| cg13924807 | chr5 | South Shelf | 0.644003505 | 0.850046303 | 0.2060428 | 0.009355 |
| cg06668976 | chr5 | Open Sea    | 0.690636338 | 0.896585789 | 0.2059495 | 0.000253 |
| cg09579677 | chr5 | North Shelf | 0.622644867 | 0.828081566 | 0.2054367 | 0.00062  |
| cg01227558 | chr5 | Open Sea    | 0.47017215  | 0.675474372 | 0.2053022 | 1.91E-05 |
| cg17022548 | chr5 | Open Sea    | 0.47213408  | 0.676890109 | 0.204756  | 0.005519 |
| cg18269219 | chr5 | Open Sea    | 0.670350976 | 0.875022544 | 0.2046716 | 0.028321 |
| cg16660494 | chr5 | Open Sea    | 0.67442102  | 0.878664088 | 0.2042431 | 0.010808 |
| cg16272981 | chr5 | Island      | 0.673805099 | 0.877673706 | 0.2038686 | 0.001063 |
| cg10984165 | chr5 | North Shore | 0.643860212 | 0.847636119 | 0.2037759 | 0.002332 |
| cg18730865 | chr5 | Open Sea    | 0.64358999  | 0.847261634 | 0.2036716 | 0.005826 |
| cg16535035 | chr5 | North Shore | 0.661045081 | 0.864341236 | 0.2032962 | 0.000208 |
| cg24931138 | chr5 | South Shore | 0.692058249 | 0.8952211   | 0.2031629 | 0.000255 |
| cg04543510 | chr5 | Open Sea    | 0.633784846 | 0.836735495 | 0.2029506 | 0.000603 |
| cg14722162 | chr5 | Open Sea    | 0.723015204 | 0.925862688 | 0.2028475 | 0.000697 |
| cg18067236 | chr5 | South Shore | 0.653157731 | 0.855865878 | 0.2027081 | 0.00017  |
| cg10958087 | chr5 | Open Sea    | 0.676670139 | 0.878918161 | 0.202248  | 0.000189 |
| cg19980718 | chr5 | Open Sea    | 0.647400862 | 0.849533003 | 0.2021321 | 0.018642 |

|            |      |             |             |             |           |          |
|------------|------|-------------|-------------|-------------|-----------|----------|
| cg00219321 | chr5 | Open Sea    | 0.644994264 | 0.846856718 | 0.2018625 | 0.016982 |
| cg06091475 | chr5 | North Shore | 0.604278726 | 0.806074791 | 0.2017961 | 0.014926 |
| cg07841848 | chr5 | South Shelf | 0.600578953 | 0.802075248 | 0.2014963 | 0.006237 |
| cg10885139 | chr5 | North Shelf | 0.732788839 | 0.933999071 | 0.2012102 | 0.001365 |
| cg09867598 | chr5 | North Shore | 0.340699652 | 0.541813714 | 0.2011141 | 0.001239 |
| cg08418076 | chr5 | North Shelf | 0.688442415 | 0.888770696 | 0.2003283 | 0.00879  |
| cg01260603 | chr6 | Open Sea    | 0.447067798 | 0.906122456 | 0.4590547 | 4.32E-09 |
| cg21080533 | chr6 | Open Sea    | 0.373404042 | 0.831361623 | 0.4579576 | 0.007108 |
| cg02482438 | chr6 | Open Sea    | 0.377646471 | 0.828856654 | 0.4512102 | 0.04682  |
| cg21095280 | chr6 | Open Sea    | 0.403934173 | 0.846171694 | 0.4422375 | 0.025264 |
| cg09385371 | chr6 | Open Sea    | 0.409533744 | 0.850263707 | 0.44073   | 1.37E-06 |
| cg23584176 | chr6 | Open Sea    | 0.342684735 | 0.776507433 | 0.4338227 | 0.000196 |
| cg08893817 | chr6 | Open Sea    | 0.463094619 | 0.876827205 | 0.4137326 | 1.27E-07 |
| cg26379822 | chr6 | Open Sea    | 0.373760762 | 0.762119993 | 0.3883592 | 0.043654 |
| cg17864650 | chr6 | Open Sea    | 0.529590268 | 0.904858168 | 0.3752679 | 6.61E-07 |
| cg00951302 | chr6 | Open Sea    | 0.415473592 | 0.790399257 | 0.3749257 | 2.95E-05 |
| cg13674558 | chr6 | North Shore | 0.298411463 | 0.67309393  | 0.3746825 | 0.000639 |
| cg08881610 | chr6 | North Shelf | 0.415849027 | 0.789697615 | 0.3738486 | 0.000711 |
| cg15496763 | chr6 | Open Sea    | 0.434358336 | 0.804929641 | 0.3705713 | 0.000121 |
| cg26234900 | chr6 | North Shore | 0.372635018 | 0.74279595  | 0.3701609 | 0.04318  |
| cg26099432 | chr6 | Open Sea    | 0.474501529 | 0.844498382 | 0.3699969 | 9.73E-08 |
| cg05768403 | chr6 | North Shelf | 0.406513436 | 0.773939356 | 0.3674259 | 0.006439 |
| cg12047363 | chr6 | Open Sea    | 0.518310981 | 0.885012372 | 0.3667014 | 1.03E-06 |
| cg05352838 | chr6 | North Shore | 0.517285003 | 0.88332204  | 0.366037  | 4.86E-08 |
| cg17160327 | chr6 | Open Sea    | 0.531932951 | 0.896337805 | 0.3644049 | 1.83E-07 |
| cg23831898 | chr6 | South Shore | 0.444707822 | 0.808166186 | 0.3634584 | 1.42E-06 |
| cg15484808 | chr6 | North Shelf | 0.390764478 | 0.751234361 | 0.3604699 | 0.005183 |
| cg19479744 | chr6 | Open Sea    | 0.544993984 | 0.904870472 | 0.3598765 | 1.23E-06 |
| cg05582719 | chr6 | Open Sea    | 0.435068322 | 0.79353838  | 0.3584701 | 0.03172  |
| cg02118886 | chr6 | Open Sea    | 0.477504015 | 0.835454774 | 0.3579508 | 0.012211 |
| cg17658266 | chr6 | Open Sea    | 0.435747029 | 0.792236024 | 0.356489  | 0.007556 |
| cg07369569 | chr6 | South Shore | 0.438965297 | 0.794494451 | 0.3555292 | 1.71E-07 |
| cg06678468 | chr6 | Open Sea    | 0.480938613 | 0.835125174 | 0.3541866 | 2.31E-07 |
| cg27101095 | chr6 | South Shelf | 0.431274287 | 0.780482306 | 0.349208  | 0.008819 |
| cg09511662 | chr6 | Open Sea    | 0.605943767 | 0.953801513 | 0.3478577 | 5.81E-08 |
| cg11798873 | chr6 | Open Sea    | 0.567890347 | 0.915233181 | 0.3473428 | 8.32E-07 |
| cg05063670 | chr6 | Open Sea    | 0.510282332 | 0.855099243 | 0.3448169 | 3.85E-06 |
| cg11179695 | chr6 | Open Sea    | 0.600090976 | 0.944457081 | 0.3443661 | 1.98E-08 |
| cg19267163 | chr6 | Open Sea    | 0.511125874 | 0.854494516 | 0.3433686 | 0.001643 |
| cg17967260 | chr6 | South Shore | 0.552828148 | 0.894851053 | 0.3420229 | 5.46E-07 |
| cg01553182 | chr6 | Open Sea    | 0.461069174 | 0.803078291 | 0.3420091 | 4.22E-06 |
| cg09081266 | chr6 | Open Sea    | 0.543262864 | 0.885203118 | 0.3419403 | 5.18E-07 |
| cg22709144 | chr6 | Open Sea    | 0.475836724 | 0.816651144 | 0.3408144 | 0.00143  |
| cg25798600 | chr6 | Open Sea    | 0.455911765 | 0.796655574 | 0.3407438 | 0.005713 |
| cg09375907 | chr6 | Open Sea    | 0.40218941  | 0.742899142 | 0.3407097 | 0.003233 |
| cg23791482 | chr6 | Open Sea    | 0.548573671 | 0.887872923 | 0.3392993 | 1.11E-06 |
| cg12466324 | chr6 | Open Sea    | 0.530428432 | 0.869700669 | 0.3392722 | 0.000412 |
| cg06473288 | chr6 | North Shore | 0.490062587 | 0.828135429 | 0.3380728 | 0.010898 |
| cg03338154 | chr6 | Open Sea    | 0.49365017  | 0.830602868 | 0.3369527 | 0.000261 |
| cg14757107 | chr6 | Open Sea    | 0.500036148 | 0.83397751  | 0.3339414 | 0.006941 |

|            |      |             |             |             |           |          |
|------------|------|-------------|-------------|-------------|-----------|----------|
| cg03002526 | chr6 | Open Sea    | 0.486578577 | 0.820087601 | 0.333509  | 0.00022  |
| cg26500033 | chr6 | South Shelf | 0.51303452  | 0.845713316 | 0.3326788 | 9.92E-07 |
| cg18192491 | chr6 | Open Sea    | 0.424404279 | 0.756441017 | 0.3320367 | 0.011381 |
| cg09101258 | chr6 | Open Sea    | 0.49845378  | 0.829419639 | 0.3309659 | 4.78E-05 |
| cg06963205 | chr6 | Open Sea    | 0.546328611 | 0.876907871 | 0.3305793 | 0.000119 |
| cg05860220 | chr6 | Open Sea    | 0.507248976 | 0.83765299  | 0.330404  | 5.75E-05 |
| cg07570394 | chr6 | Open Sea    | 0.334332085 | 0.663907666 | 0.3295756 | 1.93E-08 |
| cg01947943 | chr6 | Open Sea    | 0.429366136 | 0.758220003 | 0.3288539 | 0.039833 |
| cg00121255 | chr6 | Open Sea    | 0.401579894 | 0.727846618 | 0.3262667 | 3.85E-07 |
| cg25636466 | chr6 | North Shelf | 0.226947847 | 0.55311434  | 0.3261665 | 1.09E-06 |
| cg18885346 | chr6 | Open Sea    | 0.468557963 | 0.79376288  | 0.3252049 | 3.55E-05 |
| cg23622353 | chr6 | Open Sea    | 0.480795504 | 0.804516534 | 0.323721  | 7.28E-08 |
| cg22660196 | chr6 | Open Sea    | 0.569796656 | 0.893458469 | 0.3236618 | 0.000977 |
| cg10399946 | chr6 | South Shore | 0.56374969  | 0.886560352 | 0.3228107 | 8.78E-05 |
| cg25284213 | chr6 | Open Sea    | 0.397476772 | 0.718826241 | 0.3213495 | 0.000408 |
| cg22935609 | chr6 | Open Sea    | 0.586464703 | 0.907643894 | 0.3211792 | 3.46E-05 |
| cg16960593 | chr6 | Open Sea    | 0.466126351 | 0.786691195 | 0.3205648 | 0.015043 |
| cg09640300 | chr6 | Open Sea    | 0.555492797 | 0.875406308 | 0.3199135 | 3.57E-07 |
| cg08660395 | chr6 | South Shore | 0.456762409 | 0.776274654 | 0.3195122 | 4.29E-07 |
| cg10463626 | chr6 | North Shore | 0.594923725 | 0.914422544 | 0.3194988 | 9.39E-07 |
| cg09086416 | chr6 | Open Sea    | 0.430009936 | 0.749105954 | 0.319096  | 4.48E-05 |
| cg16599983 | chr6 | Open Sea    | 0.444667088 | 0.762851534 | 0.3181844 | 0.016106 |
| cg04499646 | chr6 | Open Sea    | 0.495058968 | 0.812025749 | 0.3169668 | 0.020989 |
| cg05376362 | chr6 | Open Sea    | 0.548294499 | 0.865142361 | 0.3168479 | 1.77E-05 |
| cg10822718 | chr6 | Open Sea    | 0.500746675 | 0.81737889  | 0.3166322 | 0.004279 |
| cg10008137 | chr6 | Open Sea    | 0.498481192 | 0.815019187 | 0.316538  | 0.020051 |
| cg11506658 | chr6 | Open Sea    | 0.548699115 | 0.864429134 | 0.31573   | 6.25E-06 |
| cg26175846 | chr6 | North Shelf | 0.444221893 | 0.759539673 | 0.3153178 | 0.002835 |
| cg24574793 | chr6 | Open Sea    | 0.222873868 | 0.53726111  | 0.3143872 | 1.82E-06 |
| cg18828927 | chr6 | Open Sea    | 0.362296763 | 0.675893049 | 0.3135963 | 7.6E-06  |
| cg00206463 | chr6 | North Shore | 0.355295083 | 0.668144563 | 0.3128495 | 0.007199 |
| cg11553755 | chr6 | Open Sea    | 0.48441016  | 0.79673436  | 0.3123242 | 0.02297  |
| cg25290482 | chr6 | Open Sea    | 0.548422765 | 0.860391974 | 0.3119692 | 0.00017  |
| cg01046798 | chr6 | Open Sea    | 0.486653048 | 0.796957412 | 0.3103044 | 0.000836 |
| cg18053030 | chr6 | Open Sea    | 0.600169633 | 0.910377293 | 0.3102077 | 1.55E-08 |
| cg10105884 | chr6 | Open Sea    | 0.507387907 | 0.817400104 | 0.3100122 | 3.87E-07 |
| cg10681008 | chr6 | North Shelf | 0.476488591 | 0.786216469 | 0.3097279 | 6.13E-05 |
| cg08766762 | chr6 | Open Sea    | 0.519841237 | 0.827634567 | 0.3077933 | 0.008043 |
| cg26684131 | chr6 | Open Sea    | 0.564151853 | 0.871650807 | 0.307499  | 8.26E-06 |
| cg17744605 | chr6 | Open Sea    | 0.62005584  | 0.927102293 | 0.3070465 | 8.71E-06 |
| cg08292919 | chr6 | Open Sea    | 0.474883088 | 0.78142806  | 0.306545  | 0.00143  |
| cg10791278 | chr6 | Open Sea    | 0.588012177 | 0.894427093 | 0.3064149 | 1.03E-07 |
| cg11708116 | chr6 | South Shore | 0.535231968 | 0.841569777 | 0.3063378 | 0.004146 |
| cg21974580 | chr6 | South Shore | 0.424511969 | 0.730643764 | 0.3061318 | 0.026284 |
| cg09903849 | chr6 | Open Sea    | 0.568839401 | 0.874929351 | 0.3060899 | 0.000886 |
| cg26501049 | chr6 | Open Sea    | 0.375196633 | 0.681174557 | 0.3059779 | 0.047337 |
| cg07970874 | chr6 | Open Sea    | 0.55708526  | 0.862982083 | 0.3058968 | 9.6E-06  |
| cg00967519 | chr6 | Open Sea    | 0.524728532 | 0.829858252 | 0.3051297 | 6.17E-05 |
| cg26188226 | chr6 | Open Sea    | 0.568783702 | 0.873745997 | 0.3049623 | 0.000497 |
| cg09083279 | chr6 | Open Sea    | 0.401543939 | 0.705438551 | 0.3038946 | 0.022592 |

|            |      |             |             |             |           |          |
|------------|------|-------------|-------------|-------------|-----------|----------|
| cg01311802 | chr6 | Open Sea    | 0.566055728 | 0.869871826 | 0.3038161 | 0.031296 |
| cg08951271 | chr6 | North Shore | 0.363314478 | 0.667098943 | 0.3037845 | 0.048954 |
| cg01559597 | chr6 | Open Sea    | 0.549969505 | 0.853130759 | 0.3031613 | 0.016753 |
| cg20529655 | chr6 | Open Sea    | 0.571197017 | 0.873936261 | 0.3027392 | 0.000126 |
| cg06351425 | chr6 | Open Sea    | 0.427342064 | 0.730056824 | 0.3027148 | 3.62E-05 |
| cg06345856 | chr6 | Open Sea    | 0.518358163 | 0.821035182 | 0.302677  | 0.023075 |
| cg27340584 | chr6 | North Shelf | 0.450937234 | 0.753611832 | 0.3026746 | 0.001384 |
| cg07538160 | chr6 | Open Sea    | 0.481747693 | 0.784367548 | 0.3026199 | 0.000646 |
| cg11522612 | chr6 | North Shelf | 0.410347715 | 0.712627132 | 0.3022794 | 6.12E-05 |
| cg08644973 | chr6 | North Shore | 0.53850089  | 0.840493337 | 0.3019924 | 0.001347 |
| cg17535702 | chr6 | North Shore | 0.566951236 | 0.867914539 | 0.3009633 | 0.001762 |
| cg25737224 | chr6 | Open Sea    | 0.446540814 | 0.747421097 | 0.3008803 | 0.043774 |
| cg24817358 | chr6 | Open Sea    | 0.485896732 | 0.785371574 | 0.2994748 | 0.003496 |
| cg03149958 | chr6 | Open Sea    | 0.338017332 | 0.63514349  | 0.2971262 | 0.000453 |
| cg06650206 | chr6 | Open Sea    | 0.59159143  | 0.888680604 | 0.2970892 | 3.67E-05 |
| cg23414861 | chr6 | Island      | 0.363902971 | 0.659656838 | 0.2957539 | 0.044153 |
| cg11611097 | chr6 | Open Sea    | 0.341534381 | 0.636415488 | 0.2948811 | 4.86E-05 |
| cg02903436 | chr6 | Open Sea    | 0.60685465  | 0.901532715 | 0.2946781 | 1.23E-05 |
| cg04344000 | chr6 | South Shore | 0.493126202 | 0.787777401 | 0.2946512 | 7.54E-05 |
| cg13675015 | chr6 | South Shelf | 0.557999923 | 0.851540551 | 0.2935406 | 0.00669  |
| cg06128123 | chr6 | Open Sea    | 0.388885483 | 0.682198021 | 0.2933125 | 0.000613 |
| cg00029521 | chr6 | South Shore | 0.491552029 | 0.78311037  | 0.2915583 | 0.0013   |
| cg11787218 | chr6 | Open Sea    | 0.447240314 | 0.738641104 | 0.2914008 | 0.001207 |
| cg15586054 | chr6 | North Shore | 0.627250754 | 0.918176859 | 0.2909261 | 0.000128 |
| cg25391023 | chr6 | Open Sea    | 0.430090463 | 0.720964586 | 0.2908741 | 0.005542 |
| cg20422212 | chr6 | Open Sea    | 0.520934019 | 0.811805074 | 0.2908711 | 1.13E-05 |
| cg19474888 | chr6 | Open Sea    | 0.432800614 | 0.72309657  | 0.290296  | 0.019166 |
| cg03031281 | chr6 | South Shore | 0.637191907 | 0.925590422 | 0.2883985 | 5.03E-05 |
| cg09039890 | chr6 | North Shore | 0.524408551 | 0.812587352 | 0.2881788 | 1.25E-05 |
| cg10779336 | chr6 | Open Sea    | 0.525946843 | 0.813896156 | 0.2879493 | 1.72E-05 |
| cg25474864 | chr6 | South Shore | 0.609650144 | 0.897399746 | 0.2877496 | 7.44E-05 |
| cg03187135 | chr6 | Open Sea    | 0.51511003  | 0.802111401 | 0.2870014 | 0.002937 |
| cg05966641 | chr6 | North Shore | 0.557089957 | 0.844025868 | 0.2869359 | 0.01093  |
| cg27231292 | chr6 | Open Sea    | 0.59849166  | 0.885396351 | 0.2869047 | 3.81E-05 |
| cg19815325 | chr6 | Open Sea    | 0.596188239 | 0.882196255 | 0.286008  | 0.000311 |
| cg10653339 | chr6 | Open Sea    | 0.545910653 | 0.831560943 | 0.2856503 | 0.001274 |
| cg10156493 | chr6 | Open Sea    | 0.603544035 | 0.888951529 | 0.2854075 | 1.51E-05 |
| cg19757131 | chr6 | Open Sea    | 0.616405128 | 0.901754533 | 0.2853494 | 0.000236 |
| cg26374826 | chr6 | Open Sea    | 0.521505784 | 0.805836469 | 0.2843307 | 0.04995  |
| cg08412584 | chr6 | Open Sea    | 0.494029143 | 0.777768591 | 0.2837394 | 0.002165 |
| cg11009001 | chr6 | Open Sea    | 0.563866064 | 0.846843986 | 0.2829779 | 0.041698 |
| cg21264972 | chr6 | Open Sea    | 0.588487486 | 0.870692673 | 0.2822052 | 0.000748 |
| cg21960303 | chr6 | Open Sea    | 0.461758595 | 0.74393224  | 0.2821736 | 0.000119 |
| cg04708601 | chr6 | Open Sea    | 0.294139321 | 0.575637035 | 0.2814977 | 0.001747 |
| cg09125623 | chr6 | Island      | 0.632419087 | 0.912651583 | 0.2802325 | 0.016738 |
| cg04639421 | chr6 | Open Sea    | 0.568866899 | 0.848859318 | 0.2799924 | 0.000102 |
| cg06599543 | chr6 | South Shore | 0.493275088 | 0.772288625 | 0.2790135 | 0.015501 |
| cg02793507 | chr6 | Open Sea    | 0.626063245 | 0.904879393 | 0.2788161 | 0.000347 |
| cg22902499 | chr6 | Open Sea    | 0.553305613 | 0.831573176 | 0.2782676 | 0.04416  |
| cg23204096 | chr6 | Open Sea    | 0.546697376 | 0.82469689  | 0.2779995 | 0.00288  |

|            |      |             |             |             |           |          |
|------------|------|-------------|-------------|-------------|-----------|----------|
| cg10643236 | chr6 | Open Sea    | 0.584776336 | 0.862611716 | 0.2778354 | 0.000921 |
| cg20126775 | chr6 | Open Sea    | 0.420057505 | 0.696925854 | 0.2768683 | 0.002581 |
| cg08947964 | chr6 | Open Sea    | 0.566769435 | 0.843284671 | 0.2765152 | 0.031885 |
| cg03807737 | chr6 | North Shore | 0.612937154 | 0.889141536 | 0.2762044 | 0.003326 |
| cg07976328 | chr6 | Open Sea    | 0.541337352 | 0.817196004 | 0.2758587 | 0.005428 |
| cg23384428 | chr6 | Open Sea    | 0.61144911  | 0.887235742 | 0.2757866 | 8.08E-06 |
| cg15492982 | chr6 | South Shelf | 0.652007023 | 0.927526005 | 0.275519  | 1.91E-05 |
| cg03608577 | chr6 | Open Sea    | 0.624068171 | 0.898694345 | 0.2746262 | 1.79E-05 |
| cg01673307 | chr6 | North Shore | 0.612146722 | 0.886363119 | 0.2742164 | 1.14E-05 |
| cg09891807 | chr6 | Open Sea    | 0.642546034 | 0.916251455 | 0.2737054 | 2.79E-06 |
| cg19297868 | chr6 | North Shelf | 0.486903655 | 0.760507933 | 0.2736043 | 1.72E-05 |
| cg10683775 | chr6 | Open Sea    | 0.633406776 | 0.906966359 | 0.2735596 | 3.38E-05 |
| cg13759676 | chr6 | Open Sea    | 0.609799634 | 0.883120995 | 0.2733214 | 0.001595 |
| cg03215160 | chr6 | Open Sea    | 0.503059656 | 0.776377306 | 0.2733177 | 0.005345 |
| cg24696967 | chr6 | North Shore | 0.664273182 | 0.937261656 | 0.2729885 | 2.66E-05 |
| cg01669948 | chr6 | Open Sea    | 0.595793319 | 0.868479208 | 0.2726859 | 0.000625 |
| cg15571896 | chr6 | Open Sea    | 0.625469202 | 0.897994783 | 0.2725256 | 3.69E-06 |
| cg04813787 | chr6 | Open Sea    | 0.452498963 | 0.724977937 | 0.272479  | 0.000681 |
| cg14608074 | chr6 | South Shore | 0.308947969 | 0.581008201 | 0.2720602 | 0.036075 |
| cg24111025 | chr6 | North Shore | 0.641137249 | 0.913150112 | 0.2720129 | 4.44E-05 |
| cg03805279 | chr6 | North Shore | 0.508917407 | 0.780890724 | 0.2719733 | 0.027382 |
| cg04747824 | chr6 | South Shelf | 0.516796746 | 0.788632714 | 0.271836  | 0.000813 |
| cg13680362 | chr6 | Open Sea    | 0.511021874 | 0.782525256 | 0.2715034 | 0.000184 |
| cg12308407 | chr6 | Open Sea    | 0.620556586 | 0.8918083   | 0.2712517 | 4.47E-05 |
| cg23250964 | chr6 | North Shelf | 0.636882487 | 0.908085372 | 0.2712029 | 0.000684 |
| cg16709517 | chr6 | Open Sea    | 0.630164642 | 0.901334168 | 0.2711695 | 0.000323 |
| cg15382659 | chr6 | Open Sea    | 0.644796871 | 0.915767034 | 0.2709702 | 1.04E-05 |
| cg07369374 | chr6 | North Shore | 0.517107453 | 0.788038111 | 0.2709307 | 0.000786 |
| cg08419582 | chr6 | Open Sea    | 0.611928497 | 0.882572441 | 0.2706439 | 0.002971 |
| cg08382963 | chr6 | Open Sea    | 0.516154532 | 0.786487922 | 0.2703334 | 0.032703 |
| cg04766529 | chr6 | South Shore | 0.622607678 | 0.891867341 | 0.2692597 | 0.00014  |
| cg14996490 | chr6 | Open Sea    | 0.62135055  | 0.890522556 | 0.269172  | 4.18E-05 |
| cg14224444 | chr6 | Open Sea    | 0.452498131 | 0.721571975 | 0.2690738 | 0.000227 |
| cg26942169 | chr6 | Open Sea    | 0.621458097 | 0.89051259  | 0.2690545 | 1.37E-07 |
| cg05368595 | chr6 | Open Sea    | 0.62546991  | 0.894503153 | 0.2690332 | 0.000842 |
| cg16786581 | chr6 | South Shore | 0.419837163 | 0.688101843 | 0.2682647 | 0.008652 |
| cg03064642 | chr6 | Open Sea    | 0.629380904 | 0.897631813 | 0.2682509 | 0.01575  |
| cg17280284 | chr6 | Open Sea    | 0.507518222 | 0.775738511 | 0.2682203 | 0.008547 |
| cg21721022 | chr6 | Open Sea    | 0.492686782 | 0.760325835 | 0.2676391 | 1.95E-06 |
| cg10994819 | chr6 | South Shelf | 0.476205575 | 0.742449301 | 0.2662437 | 0.000169 |
| cg03028515 | chr6 | Open Sea    | 0.585536986 | 0.849223473 | 0.2636865 | 0.00112  |
| cg20971927 | chr6 | Open Sea    | 0.581447034 | 0.844890543 | 0.2634435 | 3.93E-05 |
| cg00794673 | chr6 | Open Sea    | 0.236047835 | 0.499007296 | 0.2629595 | 1.94E-05 |
| cg09579704 | chr6 | Open Sea    | 0.643781835 | 0.906155259 | 0.2623734 | 0.000301 |
| cg25527882 | chr6 | North Shelf | 0.662419313 | 0.924662064 | 0.2622428 | 0.000144 |
| cg09103598 | chr6 | Open Sea    | 0.593955468 | 0.855935641 | 0.2619802 | 3.54E-05 |
| cg10852698 | chr6 | Open Sea    | 0.389931306 | 0.651844409 | 0.2619131 | 0.000116 |
| cg20872809 | chr6 | Open Sea    | 0.578631967 | 0.840059519 | 0.2614276 | 0.01308  |
| cg03012452 | chr6 | South Shelf | 0.618502896 | 0.87977402  | 0.2612711 | 0.000212 |
| cg01620077 | chr6 | Open Sea    | 0.652623895 | 0.913771843 | 0.2611479 | 2.94E-05 |

|            |      |             |             |             |           |          |
|------------|------|-------------|-------------|-------------|-----------|----------|
| cg12736037 | chr6 | Open Sea    | 0.642682912 | 0.903597291 | 0.2609144 | 0.000233 |
| cg25162117 | chr6 | Open Sea    | 0.670762491 | 0.931299376 | 0.2605369 | 9.53E-08 |
| cg14991764 | chr6 | Open Sea    | 0.543490705 | 0.80389242  | 0.2604017 | 8.31E-05 |
| cg01669185 | chr6 | Open Sea    | 0.544683727 | 0.804122481 | 0.2594388 | 0.012828 |
| cg06008803 | chr6 | Open Sea    | 0.624054522 | 0.883413652 | 0.2593591 | 8.8E-06  |
| cg04230050 | chr6 | Open Sea    | 0.596743867 | 0.855116192 | 0.2583723 | 0.029245 |
| cg00640376 | chr6 | North Shore | 0.610654338 | 0.868950943 | 0.2582966 | 7.54E-05 |
| cg08818207 | chr6 | North Shore | 0.153080691 | 0.411044187 | 0.2579635 | 0.036498 |
| cg02362508 | chr6 | South Shelf | 0.555031689 | 0.812297833 | 0.2572661 | 0.000268 |
| cg16958668 | chr6 | Open Sea    | 0.587963    | 0.845194732 | 0.2572317 | 0.019153 |
| cg10082313 | chr6 | Open Sea    | 0.639658432 | 0.896077541 | 0.2564191 | 6.72E-05 |
| cg16356737 | chr6 | North Shelf | 0.517236974 | 0.772583687 | 0.2553467 | 0.001713 |
| cg03299329 | chr6 | Open Sea    | 0.637740964 | 0.893025747 | 0.2552848 | 2.64E-05 |
| cg00213729 | chr6 | South Shore | 0.641618893 | 0.896811595 | 0.2551927 | 2.43E-05 |
| cg25379036 | chr6 | Open Sea    | 0.512464406 | 0.767578514 | 0.2551141 | 0.002626 |
| cg00801571 | chr6 | Open Sea    | 0.59973697  | 0.854547062 | 0.2548101 | 0.027298 |
| cg00187889 | chr6 | Open Sea    | 0.650249358 | 0.904884817 | 0.2546355 | 0.00012  |
| cg25724842 | chr6 | South Shelf | 0.5498644   | 0.80408389  | 0.2542195 | 0.004614 |
| cg07492590 | chr6 | North Shelf | 0.585235093 | 0.839299415 | 0.2540643 | 0.00211  |
| cg26348243 | chr6 | Open Sea    | 0.592190042 | 0.846086404 | 0.2538964 | 0.004529 |
| cg01546561 | chr6 | Open Sea    | 0.577819067 | 0.83169892  | 0.2538799 | 0.000599 |
| cg09299388 | chr6 | Open Sea    | 0.478061958 | 0.730896275 | 0.2528343 | 0.000279 |
| cg00240178 | chr6 | North Shore | 0.575030624 | 0.827544316 | 0.2525137 | 0.000697 |
| cg01200021 | chr6 | North Shore | 0.402046566 | 0.654271355 | 0.2522248 | 1.24E-05 |
| cg05357750 | chr6 | Open Sea    | 0.493403426 | 0.745381736 | 0.2519783 | 0.000407 |
| cg08273233 | chr6 | Open Sea    | 0.3121036   | 0.563956638 | 0.251853  | 0.014087 |
| cg06754764 | chr6 | Open Sea    | 0.524030652 | 0.775506865 | 0.2514762 | 0.000524 |
| cg15454110 | chr6 | North Shore | 0.556400579 | 0.807220297 | 0.2508197 | 0.011459 |
| cg14472026 | chr6 | Open Sea    | 0.482845891 | 0.733210493 | 0.2503646 | 6.59E-06 |
| cg17620300 | chr6 | Island      | 0.634134576 | 0.883264315 | 0.2491297 | 7.7E-05  |
| cg27001715 | chr6 | South Shelf | 0.189148244 | 0.438246226 | 0.249098  | 0.008703 |
| cg24070963 | chr6 | Open Sea    | 0.639190797 | 0.887351269 | 0.2481605 | 0.00014  |
| cg22887663 | chr6 | Open Sea    | 0.600223229 | 0.848364946 | 0.2481417 | 0.002642 |
| cg14270650 | chr6 | Open Sea    | 0.634391441 | 0.881847446 | 0.247456  | 0.000276 |
| cg18030265 | chr6 | North Shore | 0.557777254 | 0.804487781 | 0.2467105 | 0.031262 |
| cg24590353 | chr6 | Open Sea    | 0.369598298 | 0.615420989 | 0.2458227 | 0.022902 |
| cg02651357 | chr6 | Open Sea    | 0.654016681 | 0.898838062 | 0.2448214 | 8.08E-05 |
| cg08447044 | chr6 | Open Sea    | 0.675922606 | 0.920553323 | 0.2446307 | 3.45E-06 |
| cg05100867 | chr6 | Open Sea    | 0.496275897 | 0.740496834 | 0.2442209 | 0.002681 |
| cg10369319 | chr6 | Open Sea    | 0.612209218 | 0.856217306 | 0.2440081 | 0.005437 |
| cg17255005 | chr6 | Open Sea    | 0.585559047 | 0.829564946 | 0.2440059 | 0.013459 |
| cg07260806 | chr6 | Open Sea    | 0.523367235 | 0.767163836 | 0.2437966 | 0.000535 |
| cg06705361 | chr6 | Open Sea    | 0.624506959 | 0.868231154 | 0.2437242 | 0.016425 |
| cg07817928 | chr6 | Open Sea    | 0.655853887 | 0.899458275 | 0.2436044 | 0.002147 |
| cg12583553 | chr6 | North Shelf | 0.500640078 | 0.744046755 | 0.2434067 | 0.001634 |
| cg08355045 | chr6 | Open Sea    | 0.518916462 | 0.762190558 | 0.2432741 | 0.027119 |
| cg08907436 | chr6 | North Shelf | 0.551356324 | 0.794515572 | 0.2431592 | 0.025004 |
| cg00232996 | chr6 | North Shelf | 0.60539493  | 0.848186594 | 0.2427917 | 0.012774 |
| cg16487621 | chr6 | Open Sea    | 0.625056989 | 0.867512743 | 0.2424558 | 0.002144 |
| cg02547724 | chr6 | Open Sea    | 0.561818693 | 0.804191478 | 0.2423728 | 0.000213 |

|            |      |             |             |             |           |          |
|------------|------|-------------|-------------|-------------|-----------|----------|
| cg01804233 | chr6 | Open Sea    | 0.609293935 | 0.85062747  | 0.2413335 | 0.001359 |
| cg26740525 | chr6 | Open Sea    | 0.481098065 | 0.722320024 | 0.241222  | 0.002858 |
| cg04189381 | chr6 | Island      | 0.517292049 | 0.757306028 | 0.240014  | 0.000737 |
| cg22951342 | chr6 | Open Sea    | 0.589278557 | 0.828209762 | 0.2389312 | 0.011541 |
| cg23064481 | chr6 | Open Sea    | 0.548117008 | 0.786893845 | 0.2387768 | 0.003563 |
| cg25997219 | chr6 | North Shore | 0.447325773 | 0.686069574 | 0.2387438 | 0.000514 |
| cg10278025 | chr6 | Open Sea    | 0.238784323 | 0.477059203 | 0.2382749 | 1.64E-05 |
| cg05068156 | chr6 | Open Sea    | 0.58837765  | 0.825996314 | 0.2376187 | 0.001359 |
| cg25289569 | chr6 | North Shelf | 0.586015683 | 0.823165221 | 0.2371495 | 0.001527 |
| cg04662629 | chr6 | North Shore | 0.607426386 | 0.84442196  | 0.2369956 | 9.53E-05 |
| cg06358250 | chr6 | Island      | 0.112084992 | 0.348979259 | 0.2368943 | 0.003516 |
| cg07803420 | chr6 | North Shore | 0.448445184 | 0.684502917 | 0.2360577 | 0.040238 |
| cg14852603 | chr6 | Open Sea    | 0.580639084 | 0.816151958 | 0.2355129 | 0.000103 |
| cg00361017 | chr6 | North Shore | 0.489023975 | 0.724480282 | 0.2354563 | 0.003942 |
| cg12305265 | chr6 | North Shore | 0.515760862 | 0.750704444 | 0.2349436 | 0.011556 |
| cg07159114 | chr6 | Open Sea    | 0.534666323 | 0.769128    | 0.2344617 | 0.027983 |
| cg03978169 | chr6 | Open Sea    | 0.611571289 | 0.845964537 | 0.2343932 | 6.09E-05 |
| cg09453425 | chr6 | Open Sea    | 0.666138527 | 0.900487731 | 0.2343492 | 4.5E-05  |
| cg00735907 | chr6 | North Shore | 0.633735323 | 0.868069701 | 0.2343344 | 0.000366 |
| cg21969116 | chr6 | South Shelf | 0.63004885  | 0.864345136 | 0.2342963 | 0.000162 |
| cg05392263 | chr6 | Open Sea    | 0.603566073 | 0.837839711 | 0.2342736 | 0.001958 |
| cg15391116 | chr6 | Open Sea    | 0.677059338 | 0.91080039  | 0.2337411 | 2.66E-05 |
| cg16916688 | chr6 | Open Sea    | 0.541437162 | 0.775105179 | 0.233668  | 0.001195 |
| cg07563050 | chr6 | Open Sea    | 0.631559138 | 0.864916988 | 0.2333578 | 1.16E-05 |
| cg07061368 | chr6 | Open Sea    | 0.463211869 | 0.696414711 | 0.2332028 | 0.000157 |
| cg10141717 | chr6 | South Shelf | 0.662164936 | 0.895254244 | 0.2330893 | 0.000313 |
| cg08356243 | chr6 | Open Sea    | 0.632112911 | 0.865061091 | 0.2329482 | 0.001102 |
| cg24544512 | chr6 | Open Sea    | 0.647574298 | 0.880374016 | 0.2327997 | 2.29E-05 |
| cg10429091 | chr6 | North Shore | 0.570364223 | 0.803073744 | 0.2327095 | 0.022309 |
| cg03449857 | chr6 | Open Sea    | 0.634704837 | 0.866888785 | 0.2321839 | 0.006717 |
| cg13040666 | chr6 | South Shore | 0.596915892 | 0.828791878 | 0.231876  | 0.014559 |
| cg14021478 | chr6 | North Shore | 0.286385387 | 0.518160386 | 0.231775  | 0.031216 |
| cg08548882 | chr6 | Open Sea    | 0.666180085 | 0.897606425 | 0.2314263 | 0.000288 |
| cg04176995 | chr6 | South Shore | 0.314603104 | 0.546020744 | 0.2314176 | 2.95E-05 |
| cg26558366 | chr6 | Open Sea    | 0.623110206 | 0.854026151 | 0.2309159 | 2.35E-05 |
| cg26918723 | chr6 | Open Sea    | 0.654237194 | 0.884782651 | 0.2305455 | 2.17E-06 |
| cg23192824 | chr6 | Open Sea    | 0.672787704 | 0.902945879 | 0.2301582 | 0.00019  |
| cg01080927 | chr6 | Open Sea    | 0.708602523 | 0.938293838 | 0.2296913 | 0.00041  |
| cg11346128 | chr6 | North Shelf | 0.589136436 | 0.818237137 | 0.2291007 | 0.028426 |
| cg16343924 | chr6 | Open Sea    | 0.344637529 | 0.573589037 | 0.2289515 | 5.49E-05 |
| cg00061811 | chr6 | South Shore | 0.62143682  | 0.850379784 | 0.228943  | 0.039459 |
| cg24699871 | chr6 | Open Sea    | 0.639806783 | 0.86860637  | 0.2287996 | 0.000336 |
| cg09198601 | chr6 | North Shore | 0.494440032 | 0.723152474 | 0.2287124 | 0.013699 |
| cg13384212 | chr6 | Open Sea    | 0.564161641 | 0.792657877 | 0.2284962 | 0.019335 |
| cg21582973 | chr6 | Open Sea    | 0.679737364 | 0.908172351 | 0.228435  | 0.000978 |
| cg17945766 | chr6 | Open Sea    | 0.604081576 | 0.831622147 | 0.2275406 | 1.65E-05 |
| cg16809040 | chr6 | Open Sea    | 0.517354165 | 0.74469672  | 0.2273426 | 0.000235 |
| cg25956483 | chr6 | Open Sea    | 0.586307656 | 0.813539546 | 0.2272319 | 3.76E-05 |
| cg13178597 | chr6 | Open Sea    | 0.412918395 | 0.639509811 | 0.2265914 | 0.040739 |
| cg15919612 | chr6 | Open Sea    | 0.410920013 | 0.63739935  | 0.2264793 | 0.031226 |



|            |      |             |             |             |           |          |
|------------|------|-------------|-------------|-------------|-----------|----------|
| cg00753442 | chr6 | Open Sea    | 0.656767663 | 0.883227181 | 0.2264595 | 0.000584 |
| cg01442943 | chr6 | Open Sea    | 0.469123965 | 0.695269285 | 0.2261453 | 0.001163 |
| cg18392943 | chr6 | Open Sea    | 0.579062982 | 0.805018251 | 0.2259553 | 0.004794 |
| cg01518591 | chr6 | Open Sea    | 0.555373951 | 0.780941385 | 0.2255674 | 0.011987 |
| cg22973012 | chr6 | Open Sea    | 0.532711404 | 0.757925882 | 0.2252145 | 0.007672 |
| cg19496554 | chr6 | Open Sea    | 0.639748303 | 0.864933783 | 0.2251855 | 0.000257 |
| cg20759486 | chr6 | Open Sea    | 0.616507862 | 0.841678389 | 0.2251705 | 0.017513 |
| cg00647262 | chr6 | South Shore | 0.471600235 | 0.696672405 | 0.2250722 | 0.00441  |
| cg16231066 | chr6 | South Shelf | 0.59932317  | 0.824380218 | 0.225057  | 0.000184 |
| cg25323497 | chr6 | Open Sea    | 0.648435544 | 0.873209345 | 0.2247738 | 0.00016  |
| cg00988577 | chr6 | South Shelf | 0.650539353 | 0.874564788 | 0.2240254 | 0.001338 |
| cg05720511 | chr6 | Open Sea    | 0.700417663 | 0.923975846 | 0.2235582 | 0.000158 |
| cg14011416 | chr6 | Open Sea    | 0.468596854 | 0.691264568 | 0.2226677 | 0.009978 |
| cg11324712 | chr6 | Open Sea    | 0.473200096 | 0.695800905 | 0.2226008 | 3.04E-06 |
| cg25382108 | chr6 | Open Sea    | 0.703852286 | 0.926448708 | 0.2225964 | 0.000746 |
| cg25561409 | chr6 | Open Sea    | 0.658387988 | 0.880930195 | 0.2225422 | 0.000936 |
| cg23205936 | chr6 | Open Sea    | 0.616161095 | 0.838125602 | 0.2219645 | 0.027047 |
| cg22254464 | chr6 | North Shelf | 0.428536708 | 0.650341761 | 0.2218051 | 0.005997 |
| cg09732335 | chr6 | Open Sea    | 0.673352903 | 0.895105906 | 0.221753  | 0.000111 |
| cg13620881 | chr6 | South Shore | 0.541364895 | 0.763037159 | 0.2216723 | 0.041058 |
| cg07014126 | chr6 | Open Sea    | 0.703181603 | 0.92471956  | 0.221538  | 0.00142  |
| cg22681721 | chr6 | North Shelf | 0.540932921 | 0.762121374 | 0.2211885 | 0.011892 |
| cg01558785 | chr6 | Open Sea    | 0.620378555 | 0.841335514 | 0.220957  | 0.002496 |
| cg14004552 | chr6 | South Shelf | 0.57738892  | 0.79799385  | 0.2206049 | 0.015757 |
| cg17952446 | chr6 | Open Sea    | 0.681056328 | 0.901656088 | 0.2205998 | 3.43E-05 |
| cg23481169 | chr6 | Open Sea    | 0.665937332 | 0.886330916 | 0.2203936 | 0.00046  |
| cg20192387 | chr6 | Open Sea    | 0.663122494 | 0.883433936 | 0.2203114 | 0.001719 |
| cg24360137 | chr6 | South Shore | 0.688085746 | 0.908360541 | 0.2202748 | 0.000872 |
| cg22425813 | chr6 | Open Sea    | 0.673093237 | 0.893242339 | 0.2201491 | 0.00111  |
| cg03754044 | chr6 | Open Sea    | 0.283160626 | 0.503151251 | 0.2199906 | 0.048055 |
| cg17587997 | chr6 | Open Sea    | 0.673964735 | 0.893891161 | 0.2199264 | 5.72E-05 |
| cg24452282 | chr6 | Open Sea    | 0.547295411 | 0.76715478  | 0.2198594 | 0.041806 |
| cg20235471 | chr6 | Open Sea    | 0.675162942 | 0.895020228 | 0.2198573 | 0.000392 |
| cg22996742 | chr6 | Open Sea    | 0.458447121 | 0.678299311 | 0.2198522 | 0.000258 |
| cg24677671 | chr6 | South Shore | 0.643528809 | 0.863053497 | 0.2195247 | 6.67E-05 |
| cg19471040 | chr6 | Open Sea    | 0.425212359 | 0.64468799  | 0.2194756 | 0.000218 |
| cg23164076 | chr6 | Open Sea    | 0.654893023 | 0.874332145 | 0.2194391 | 0.005643 |
| cg25267258 | chr6 | Open Sea    | 0.561836915 | 0.780586093 | 0.2187492 | 0.017625 |
| cg24497955 | chr6 | Open Sea    | 0.693477844 | 0.912224642 | 0.2187468 | 0.000148 |
| cg13475248 | chr6 | Open Sea    | 0.699894614 | 0.918467182 | 0.2185726 | 0.000591 |
| cg23500637 | chr6 | South Shelf | 0.647544592 | 0.865657224 | 0.2181126 | 0.000543 |
| cg03800296 | chr6 | Open Sea    | 0.671170327 | 0.889169132 | 0.2179988 | 0.000985 |
| cg19200440 | chr6 | Open Sea    | 0.725407319 | 0.943388196 | 0.2179809 | 8.74E-06 |
| cg04926384 | chr6 | Open Sea    | 0.588572809 | 0.806377137 | 0.2178043 | 0.008572 |
| cg00742465 | chr6 | North Shelf | 0.427099509 | 0.644672364 | 0.2175729 | 0.002435 |
| cg05007697 | chr6 | Open Sea    | 0.708537686 | 0.925565297 | 0.2170276 | 0.000461 |
| cg12628075 | chr6 | Open Sea    | 0.397037472 | 0.614002696 | 0.2169652 | 6.98E-05 |
| cg02151752 | chr6 | Open Sea    | 0.664972667 | 0.88163858  | 0.2166659 | 1.04E-05 |
| cg03046001 | chr6 | Open Sea    | 0.653979395 | 0.870317366 | 0.216338  | 0.000157 |
| cg17859772 | chr6 | Open Sea    | 0.521029148 | 0.737202928 | 0.2161738 | 8.29E-06 |

|            |      |             |             |             |           |          |
|------------|------|-------------|-------------|-------------|-----------|----------|
| cg25734928 | chr6 | North Shelf | 0.363523258 | 0.579666442 | 0.2161432 | 0.009912 |
| cg17451015 | chr6 | Open Sea    | 0.578681011 | 0.794750983 | 0.21607   | 0.006111 |
| cg26076858 | chr6 | Open Sea    | 0.641544737 | 0.857574424 | 0.2160297 | 0.036689 |
| cg09649901 | chr6 | Open Sea    | 0.624010947 | 0.839898095 | 0.2158871 | 0.001001 |
| cg17563504 | chr6 | Open Sea    | 0.630728029 | 0.846437401 | 0.2157094 | 0.023991 |
| cg02642841 | chr6 | Open Sea    | 0.697082675 | 0.912459399 | 0.2153767 | 0.000218 |
| cg00163727 | chr6 | Open Sea    | 0.53715597  | 0.752395158 | 0.2152392 | 0.005443 |
| cg05388401 | chr6 | Open Sea    | 0.673442552 | 0.888487592 | 0.215045  | 0.011459 |
| cg08906009 | chr6 | Open Sea    | 0.668050373 | 0.883094849 | 0.2150445 | 0.00083  |
| cg24697648 | chr6 | Open Sea    | 0.372296851 | 0.587134877 | 0.214838  | 0.000489 |
| cg25149023 | chr6 | Open Sea    | 0.540488277 | 0.755132305 | 0.214644  | 0.000146 |
| cg00938547 | chr6 | Open Sea    | 0.651373321 | 0.86579255  | 0.2144192 | 1.88E-05 |
| cg21103269 | chr6 | Open Sea    | 0.710585158 | 0.924867418 | 0.2142823 | 0.005282 |
| cg12094863 | chr6 | North Shore | 0.518709541 | 0.732944084 | 0.2142345 | 0.000107 |
| cg11678118 | chr6 | South Shelf | 0.689499033 | 0.90347128  | 0.2139722 | 0.00113  |
| cg03988374 | chr6 | Open Sea    | 0.613284723 | 0.826699963 | 0.2134152 | 9.67E-05 |
| cg23716866 | chr6 | Open Sea    | 0.423414648 | 0.636449964 | 0.2130353 | 0.025116 |
| cg16479474 | chr6 | Open Sea    | 0.699861711 | 0.912834162 | 0.2129725 | 7.02E-05 |
| cg21367769 | chr6 | North Shore | 0.647978106 | 0.86077949  | 0.2128014 | 0.000541 |
| cg02408532 | chr6 | Open Sea    | 0.442141309 | 0.65477682  | 0.2126355 | 3.14E-06 |
| cg06968241 | chr6 | Open Sea    | 0.4985783   | 0.711005389 | 0.2124271 | 0.030868 |
| cg01024792 | chr6 | South Shelf | 0.650899295 | 0.8630284   | 0.2121291 | 0.005079 |
| cg08196667 | chr6 | Open Sea    | 0.659936631 | 0.871623946 | 0.2116873 | 0.000364 |
| cg10716518 | chr6 | South Shelf | 0.628108479 | 0.839709764 | 0.2116013 | 0.000766 |
| cg08727239 | chr6 | South Shore | 0.638102237 | 0.849068127 | 0.2109659 | 0.000407 |
| cg13563634 | chr6 | North Shore | 0.354745266 | 0.56559695  | 0.2108517 | 0.004936 |
| cg17537380 | chr6 | South Shore | 0.691640472 | 0.90239914  | 0.2107587 | 0.000241 |
| cg03550727 | chr6 | South Shelf | 0.570669061 | 0.780994471 | 0.2103254 | 0.000471 |
| cg16157288 | chr6 | Open Sea    | 0.68048797  | 0.890706105 | 0.2102181 | 0.006014 |
| cg13662121 | chr6 | North Shore | 0.448603482 | 0.658745418 | 0.2101419 | 0.000178 |
| cg13351860 | chr6 | South Shelf | 0.565141054 | 0.775250311 | 0.2101093 | 0.002941 |
| cg22739554 | chr6 | Open Sea    | 0.661641921 | 0.871659177 | 0.2100173 | 0.003588 |
| cg00015340 | chr6 | Open Sea    | 0.707567322 | 0.917300449 | 0.2097331 | 2.36E-05 |
| cg04312119 | chr6 | Open Sea    | 0.618637507 | 0.828272246 | 0.2096347 | 0.004016 |
| cg16989143 | chr6 | Island      | 0.68475895  | 0.89421585  | 0.2094569 | 0.000477 |
| cg24639690 | chr6 | Open Sea    | 0.676842752 | 0.886251043 | 0.2094083 | 0.00178  |
| cg01184149 | chr6 | North Shore | 0.634872198 | 0.844202779 | 0.2093306 | 0.005354 |
| cg04684481 | chr6 | Open Sea    | 0.630956102 | 0.839864685 | 0.2089086 | 0.000229 |
| cg22842085 | chr6 | Open Sea    | 0.625543432 | 0.833484175 | 0.2079407 | 0.006922 |
| cg13406003 | chr6 | Open Sea    | 0.579286131 | 0.787201883 | 0.2079158 | 0.000143 |
| cg11168694 | chr6 | Open Sea    | 0.700926944 | 0.908456948 | 0.20753   | 0.003611 |
| cg08430325 | chr6 | South Shore | 0.571821885 | 0.779136059 | 0.2073142 | 0.014971 |
| cg06340118 | chr6 | South Shore | 0.37279279  | 0.58005547  | 0.2072627 | 0.049668 |
| cg27355501 | chr6 | North Shore | 0.491558758 | 0.698282656 | 0.2067239 | 0.00013  |
| cg01660346 | chr6 | Open Sea    | 0.69221529  | 0.898703023 | 0.2064877 | 0.001818 |
| cg23160829 | chr6 | Open Sea    | 0.707702249 | 0.913734672 | 0.2060324 | 0.000963 |
| cg05842175 | chr6 | Open Sea    | 0.679032902 | 0.884801558 | 0.2057687 | 0.001096 |
| cg16537676 | chr6 | North Shore | 0.36813846  | 0.573486541 | 0.2053481 | 0.024079 |
| cg11239749 | chr6 | Open Sea    | 0.640619586 | 0.844955927 | 0.2043363 | 0.000296 |
| cg10219995 | chr6 | Open Sea    | 0.53285065  | 0.737111595 | 0.2042609 | 0.001886 |

|            |      |             |             |             |           |          |
|------------|------|-------------|-------------|-------------|-----------|----------|
| cg06545464 | chr6 | Open Sea    | 0.689648856 | 0.893879148 | 0.2042303 | 0.000171 |
| cg25934495 | chr6 | Open Sea    | 0.638383568 | 0.842299492 | 0.2039159 | 0.019777 |
| cg12887840 | chr6 | Open Sea    | 0.695832539 | 0.899174661 | 0.2033421 | 0.000171 |
| cg01254264 | chr6 | Open Sea    | 0.533662923 | 0.73686107  | 0.2031981 | 0.00765  |
| cg16002544 | chr6 | Open Sea    | 0.738066787 | 0.94114578  | 0.203079  | 0.000682 |
| cg25789370 | chr6 | South Shore | 0.607377004 | 0.810352877 | 0.2029759 | 0.001281 |
| cg06960700 | chr6 | Open Sea    | 0.68361759  | 0.886417987 | 0.2028004 | 0.000122 |
| cg10511390 | chr6 | North Shelf | 0.547882658 | 0.750664702 | 0.202782  | 0.00659  |
| cg02149532 | chr6 | Open Sea    | 0.66917694  | 0.871938018 | 0.2027611 | 0.032893 |
| cg19772011 | chr6 | North Shore | 0.124872551 | 0.327613308 | 0.2027408 | 0.001209 |
| cg23520757 | chr6 | Open Sea    | 0.525436777 | 0.727848764 | 0.202412  | 0.000484 |
| cg13336485 | chr6 | Open Sea    | 0.645466428 | 0.847746661 | 0.2022802 | 0.002269 |
| cg05094429 | chr6 | Open Sea    | 0.653557407 | 0.854672684 | 0.2011153 | 0.002834 |
| cg10146514 | chr6 | Open Sea    | 0.702679507 | 0.902870519 | 0.200191  | 0.001765 |
| cg19201856 | chr7 | Open Sea    | 0.439551594 | 0.954195509 | 0.5146439 | 1.95E-10 |
| cg01116873 | chr7 | Open Sea    | 0.342896639 | 0.851063015 | 0.5081664 | 0.003068 |
| cg15574810 | chr7 | Open Sea    | 0.444714924 | 0.946438052 | 0.5017231 | 3.1E-10  |
| cg25171118 | chr7 | Open Sea    | 0.355974338 | 0.824783619 | 0.4688093 | 4.35E-05 |
| cg06950346 | chr7 | Open Sea    | 0.387483717 | 0.851445484 | 0.4639618 | 7.38E-05 |
| cg11892240 | chr7 | Open Sea    | 0.358290589 | 0.816354664 | 0.4580641 | 0.010501 |
| cg12055258 | chr7 | Open Sea    | 0.431533968 | 0.883920001 | 0.452386  | 2.68E-09 |
| cg22128328 | chr7 | South Shelf | 0.408221723 | 0.855624913 | 0.4474032 | 9.24E-08 |
| cg13200640 | chr7 | North Shore | 0.492559289 | 0.936085947 | 0.4435267 | 5.15E-09 |
| cg06601993 | chr7 | Open Sea    | 0.395203703 | 0.83869049  | 0.4434868 | 0.0176   |
| cg00085486 | chr7 | North Shelf | 0.440549893 | 0.877363253 | 0.4368134 | 2.1E-07  |
| cg17578341 | chr7 | Open Sea    | 0.47641136  | 0.910195117 | 0.4337838 | 2.26E-08 |
| cg19486437 | chr7 | Open Sea    | 0.35126802  | 0.774649087 | 0.4233811 | 3.64E-08 |
| cg22213042 | chr7 | Open Sea    | 0.43629194  | 0.859330875 | 0.4230389 | 3.36E-07 |
| cg16275882 | chr7 | South Shore | 0.1442283   | 0.564121078 | 0.4198928 | 0.001395 |
| cg23950788 | chr7 | Open Sea    | 0.387502967 | 0.807385018 | 0.4198821 | 2.77E-08 |
| cg09424566 | chr7 | Open Sea    | 0.473394512 | 0.889308541 | 0.415914  | 2.38E-08 |
| cg21336434 | chr7 | Open Sea    | 0.432949813 | 0.848705197 | 0.4157554 | 7.54E-05 |
| cg12552626 | chr7 | Open Sea    | 0.500820993 | 0.914593356 | 0.4137724 | 3.28E-07 |
| cg14401837 | chr7 | Open Sea    | 0.449646739 | 0.861615211 | 0.4119685 | 5.15E-05 |
| cg02124565 | chr7 | Open Sea    | 0.457081187 | 0.868400622 | 0.4113194 | 0.0116   |
| cg10576132 | chr7 | Open Sea    | 0.411356343 | 0.818782808 | 0.4074265 | 0.00015  |
| cg22963629 | chr7 | Open Sea    | 0.410818303 | 0.81511396  | 0.4042957 | 0.006263 |
| cg24458314 | chr7 | Open Sea    | 0.363046244 | 0.766449608 | 0.4034034 | 0.001388 |
| cg12001930 | chr7 | Open Sea    | 0.311352291 | 0.713149727 | 0.4017974 | 8.68E-05 |
| cg06544061 | chr7 | South Shelf | 0.452286664 | 0.850831621 | 0.398545  | 1.33E-05 |
| cg11327659 | chr7 | North Shore | 0.499324624 | 0.896681533 | 0.3973569 | 3.29E-08 |
| cg27182527 | chr7 | Open Sea    | 0.462942514 | 0.859412766 | 0.3964703 | 0.002937 |
| cg17287122 | chr7 | Open Sea    | 0.494948815 | 0.889838271 | 0.3948895 | 2.18E-06 |
| cg12976145 | chr7 | Open Sea    | 0.393468093 | 0.786533496 | 0.3930654 | 3.64E-05 |
| cg26724841 | chr7 | North Shelf | 0.491149576 | 0.882215501 | 0.3910659 | 1.76E-06 |
| cg04879211 | chr7 | North Shore | 0.427911573 | 0.818884766 | 0.3909732 | 5.8E-06  |
| cg10731848 | chr7 | Open Sea    | 0.422609985 | 0.813254315 | 0.3906443 | 1.77E-05 |
| cg19410046 | chr7 | Open Sea    | 0.493319048 | 0.883154939 | 0.3898359 | 8.81E-08 |
| cg07339864 | chr7 | Open Sea    | 0.483321217 | 0.872890339 | 0.3895691 | 7.53E-08 |
| cg18583276 | chr7 | Open Sea    | 0.571859956 | 0.956487557 | 0.3846276 | 1.18E-06 |

|            |      |             |             |             |           |          |
|------------|------|-------------|-------------|-------------|-----------|----------|
| cg21249131 | chr7 | Open Sea    | 0.427821336 | 0.809694379 | 0.381873  | 0.026749 |
| cg00232092 | chr7 | North Shelf | 0.443566315 | 0.825068424 | 0.3815021 | 0.011606 |
| cg19998533 | chr7 | Open Sea    | 0.302664245 | 0.683407126 | 0.3807429 | 0.012085 |
| cg18021623 | chr7 | Open Sea    | 0.379615923 | 0.759090533 | 0.3794746 | 0.029373 |
| cg24661184 | chr7 | Open Sea    | 0.466334916 | 0.845088374 | 0.3787535 | 0.029183 |
| cg11060604 | chr7 | Open Sea    | 0.481365279 | 0.859907217 | 0.3785419 | 0.012411 |
| cg18018990 | chr7 | Open Sea    | 0.404981472 | 0.782868522 | 0.3778871 | 6.62E-06 |
| cg20518096 | chr7 | Open Sea    | 0.433659982 | 0.811400985 | 0.377741  | 9.38E-08 |
| cg09657435 | chr7 | Open Sea    | 0.504676922 | 0.882171004 | 0.3774941 | 1.69E-05 |
| cg02607810 | chr7 | Open Sea    | 0.432984296 | 0.805910653 | 0.3729264 | 0.036096 |
| cg20135307 | chr7 | Open Sea    | 0.538783355 | 0.91063761  | 0.3718543 | 2.94E-06 |
| cg15577272 | chr7 | Open Sea    | 0.361626091 | 0.733318828 | 0.3716927 | 0.000676 |
| cg19348272 | chr7 | North Shore | 0.494496587 | 0.865986809 | 0.3714902 | 1.2E-06  |
| cg19509988 | chr7 | Open Sea    | 0.495100848 | 0.864725585 | 0.3696247 | 0.000457 |
| cg00638020 | chr7 | North Shore | 0.361303626 | 0.730602727 | 0.3692991 | 0.017663 |
| cg08564874 | chr7 | Open Sea    | 0.439419074 | 0.808632229 | 0.3692132 | 2.3E-07  |
| cg06866451 | chr7 | Open Sea    | 0.48333039  | 0.850719319 | 0.3673889 | 0.030645 |
| cg12771187 | chr7 | Open Sea    | 0.49678954  | 0.863570065 | 0.3667805 | 0.005926 |
| cg12669355 | chr7 | Open Sea    | 0.462103997 | 0.827671519 | 0.3655675 | 0.000708 |
| cg17161266 | chr7 | Open Sea    | 0.486637463 | 0.850988988 | 0.3643515 | 5.98E-09 |
| cg09278623 | chr7 | Open Sea    | 0.475505121 | 0.839175422 | 0.3636703 | 0.036784 |
| cg13495373 | chr7 | Open Sea    | 0.534003029 | 0.897194732 | 0.3631917 | 8.94E-08 |
| cg23443190 | chr7 | Open Sea    | 0.468833705 | 0.831821161 | 0.3629875 | 6.43E-08 |
| cg06449934 | chr7 | North Shore | 0.333029461 | 0.695476178 | 0.3624467 | 0.044766 |
| cg01214063 | chr7 | Open Sea    | 0.445569377 | 0.807105202 | 0.3615358 | 1.31E-06 |
| cg20311601 | chr7 | Open Sea    | 0.522635701 | 0.883958504 | 0.3613228 | 4.73E-07 |
| cg01747978 | chr7 | Open Sea    | 0.469987615 | 0.829867567 | 0.35988   | 9.69E-09 |
| cg09004351 | chr7 | Open Sea    | 0.568968073 | 0.927512244 | 0.3585442 | 4.27E-08 |
| cg09418000 | chr7 | Open Sea    | 0.582765643 | 0.941268112 | 0.3585025 | 1.13E-06 |
| cg01966732 | chr7 | Open Sea    | 0.459901453 | 0.818276925 | 0.3583755 | 0.003342 |
| cg01025690 | chr7 | Open Sea    | 0.430243209 | 0.787931657 | 0.3576884 | 7.74E-05 |
| cg14468481 | chr7 | Island      | 0.275071694 | 0.632522556 | 0.3574509 | 0.000647 |
| cg18207099 | chr7 | Open Sea    | 0.483770747 | 0.840317216 | 0.3565465 | 8.06E-05 |
| cg22578425 | chr7 | Open Sea    | 0.498905296 | 0.852239086 | 0.3533338 | 0.021459 |
| cg03304660 | chr7 | North Shore | 0.515749275 | 0.868636977 | 0.3528877 | 0.000119 |
| cg06906464 | chr7 | Open Sea    | 0.285779624 | 0.638560872 | 0.3527812 | 0.024409 |
| cg09626054 | chr7 | Open Sea    | 0.351439011 | 0.704037209 | 0.3525982 | 6.01E-09 |
| cg11844087 | chr7 | Open Sea    | 0.433525744 | 0.785823703 | 0.352298  | 4.33E-07 |
| cg24057107 | chr7 | Open Sea    | 0.376657417 | 0.728690253 | 0.3520328 | 0.006632 |
| cg17276624 | chr7 | Open Sea    | 0.503885126 | 0.855353501 | 0.3514684 | 0.048887 |
| cg10361005 | chr7 | North Shelf | 0.4367204   | 0.787370775 | 0.3506504 | 0.001026 |
| cg06890890 | chr7 | North Shelf | 0.434843155 | 0.785391725 | 0.3505486 | 0.02001  |
| cg25640382 | chr7 | Open Sea    | 0.519251011 | 0.868213841 | 0.3489628 | 5.78E-06 |
| cg14981819 | chr7 | Open Sea    | 0.523934243 | 0.872253197 | 0.348319  | 1.19E-05 |
| cg12894814 | chr7 | Open Sea    | 0.397663207 | 0.743504375 | 0.3458412 | 0.029107 |
| cg06555227 | chr7 | North Shelf | 0.497158777 | 0.842967208 | 0.3458084 | 0.006225 |
| cg01008557 | chr7 | Open Sea    | 0.485005336 | 0.830514757 | 0.3455094 | 1.38E-07 |
| cg18682226 | chr7 | North Shelf | 0.514517733 | 0.859975808 | 0.3454581 | 0.0059   |
| cg13306338 | chr7 | North Shore | 0.553476074 | 0.896707832 | 0.3432318 | 0.001675 |
| cg23783444 | chr7 | North Shore | 0.562716263 | 0.903687879 | 0.3409716 | 3.36E-06 |

|            |      |             |             |             |           |          |
|------------|------|-------------|-------------|-------------|-----------|----------|
| cg22831029 | chr7 | Open Sea    | 0.47242313  | 0.813068123 | 0.340645  | 0.00277  |
| cg13839563 | chr7 | Open Sea    | 0.412698237 | 0.751971052 | 0.3392728 | 0.019762 |
| cg03980715 | chr7 | North Shore | 0.57383082  | 0.912736292 | 0.3389055 | 3.11E-08 |
| cg00496462 | chr7 | Open Sea    | 0.456813749 | 0.794928816 | 0.3381151 | 0.028571 |
| cg19555641 | chr7 | Open Sea    | 0.560028956 | 0.897153868 | 0.3371249 | 3.22E-06 |
| cg00927226 | chr7 | Open Sea    | 0.54488613  | 0.881924647 | 0.3370385 | 1.32E-05 |
| cg20670679 | chr7 | South Shore | 0.380756136 | 0.717301835 | 0.3365457 | 0.041955 |
| cg18099070 | chr7 | Open Sea    | 0.502074622 | 0.838167568 | 0.3360929 | 2.35E-07 |
| cg11872672 | chr7 | Open Sea    | 0.433977108 | 0.769468404 | 0.3354913 | 0.000195 |
| cg20655099 | chr7 | North Shore | 0.473651697 | 0.808740207 | 0.3350885 | 0.033347 |
| cg13364075 | chr7 | North Shore | 0.499444826 | 0.833278594 | 0.3338338 | 1.44E-07 |
| cg25910519 | chr7 | South Shelf | 0.443425136 | 0.776108852 | 0.3326837 | 0.004847 |
| cg03727554 | chr7 | Open Sea    | 0.435901958 | 0.766739646 | 0.3308377 | 3.61E-05 |
| cg14354418 | chr7 | Open Sea    | 0.476685571 | 0.807280007 | 0.3305944 | 0.000409 |
| cg22786667 | chr7 | Open Sea    | 0.18622921  | 0.516581312 | 0.3303521 | 0.03008  |
| cg19691505 | chr7 | Open Sea    | 0.499059293 | 0.828874424 | 0.3298151 | 0.000167 |
| cg09193751 | chr7 | South Shore | 0.481290455 | 0.809873173 | 0.3285827 | 0.000317 |
| cg25149888 | chr7 | North Shore | 0.614822904 | 0.943220216 | 0.3283973 | 1.65E-05 |
| cg17126250 | chr7 | Open Sea    | 0.510901661 | 0.838996432 | 0.3280948 | 0.001887 |
| cg27635135 | chr7 | Open Sea    | 0.310671359 | 0.638696103 | 0.3280247 | 0.030174 |
| cg11091262 | chr7 | Open Sea    | 0.535755971 | 0.863759292 | 0.3280033 | 0.00325  |
| cg21163617 | chr7 | North Shelf | 0.549389446 | 0.875580603 | 0.3261912 | 8.4E-05  |
| cg11655410 | chr7 | Open Sea    | 0.5322266   | 0.858303434 | 0.3260768 | 3.68E-06 |
| cg08625996 | chr7 | Open Sea    | 0.585678627 | 0.911474646 | 0.325796  | 1.82E-07 |
| cg18008487 | chr7 | Island      | 0.427736774 | 0.75347031  | 0.3257335 | 1.09E-08 |
| cg22081879 | chr7 | Open Sea    | 0.322242659 | 0.647915222 | 0.3256726 | 6.55E-07 |
| cg24579534 | chr7 | South Shore | 0.565866701 | 0.891436203 | 0.3255695 | 8.53E-06 |
| cg21561953 | chr7 | Open Sea    | 0.294425807 | 0.6182817   | 0.3238559 | 0.018213 |
| cg03609427 | chr7 | Open Sea    | 0.488866976 | 0.812093832 | 0.3232269 | 0.001473 |
| cg02090654 | chr7 | Open Sea    | 0.36452436  | 0.687395541 | 0.3228712 | 0.006856 |
| cg14655044 | chr7 | Open Sea    | 0.616007472 | 0.937791098 | 0.3217836 | 6.49E-07 |
| cg00772192 | chr7 | Open Sea    | 0.450844738 | 0.772447671 | 0.3216029 | 0.036925 |
| cg18523666 | chr7 | Open Sea    | 0.54110014  | 0.862536099 | 0.321436  | 0.00705  |
| cg03334072 | chr7 | Open Sea    | 0.390744133 | 0.711949939 | 0.3212058 | 0.005423 |
| cg01108633 | chr7 | Open Sea    | 0.402655359 | 0.723819818 | 0.3211645 | 0.028118 |
| cg16626196 | chr7 | Open Sea    | 0.570543425 | 0.891328542 | 0.3207851 | 0.00055  |
| cg18743793 | chr7 | North Shelf | 0.497457075 | 0.817433656 | 0.3199766 | 0.003183 |
| cg07212384 | chr7 | Open Sea    | 0.369579757 | 0.688394501 | 0.3188147 | 2.71E-05 |
| cg03330374 | chr7 | North Shore | 0.421638334 | 0.740332442 | 0.3186941 | 4.15E-06 |
| cg19908611 | chr7 | North Shelf | 0.567920884 | 0.885995739 | 0.3180749 | 0.000168 |
| cg16868253 | chr7 | Open Sea    | 0.472195573 | 0.789897389 | 0.3177018 | 6.73E-06 |
| cg01759887 | chr7 | Open Sea    | 0.282791182 | 0.599872614 | 0.3170814 | 0.003384 |
| cg26550874 | chr7 | Open Sea    | 0.594980617 | 0.911707281 | 0.3167267 | 0.000106 |
| cg05876425 | chr7 | North Shore | 0.509643002 | 0.8262713   | 0.3166283 | 0.033442 |
| cg24426405 | chr7 | Open Sea    | 0.333068825 | 0.649662832 | 0.316594  | 0.002543 |
| cg27069616 | chr7 | Open Sea    | 0.380083551 | 0.696536095 | 0.3164525 | 0.026665 |
| cg22461758 | chr7 | Open Sea    | 0.495686853 | 0.81156572  | 0.3158789 | 5.98E-05 |
| cg08886154 | chr7 | Open Sea    | 0.388865935 | 0.704668793 | 0.3158029 | 1.29E-08 |
| cg17387069 | chr7 | Open Sea    | 0.562754205 | 0.877664454 | 0.3149102 | 3.65E-05 |
| cg18940274 | chr7 | Open Sea    | 0.511554727 | 0.824810239 | 0.3132555 | 0.017629 |

|            |      |             |             |             |           |          |
|------------|------|-------------|-------------|-------------|-----------|----------|
| cg03986017 | chr7 | Open Sea    | 0.538603759 | 0.851578535 | 0.3129748 | 0.000244 |
| cg04423214 | chr7 | Open Sea    | 0.428305579 | 0.740861437 | 0.3125559 | 0.0102   |
| cg26875832 | chr7 | Open Sea    | 0.475530283 | 0.787976466 | 0.3124462 | 5.92E-06 |
| cg19718662 | chr7 | Open Sea    | 0.380284437 | 0.691919787 | 0.3116353 | 0.000161 |
| cg07776698 | chr7 | Open Sea    | 0.56630363  | 0.877341639 | 0.311038  | 0.003339 |
| cg16492510 | chr7 | South Shore | 0.457064742 | 0.767734945 | 0.3106702 | 0.027955 |
| cg15014369 | chr7 | Open Sea    | 0.561334954 | 0.871458888 | 0.3101239 | 6.73E-06 |
| cg11744116 | chr7 | Open Sea    | 0.495187904 | 0.804632585 | 0.3094447 | 0.014578 |
| cg02657855 | chr7 | Open Sea    | 0.547628406 | 0.856103804 | 0.3084754 | 0.000504 |
| cg12073479 | chr7 | North Shore | 0.554228506 | 0.862417221 | 0.3081887 | 0.001075 |
| cg03367622 | chr7 | Open Sea    | 0.509109352 | 0.817209888 | 0.3081005 | 0.011115 |
| cg07800208 | chr7 | Open Sea    | 0.497713895 | 0.805286459 | 0.3075726 | 0.007613 |
| cg22295983 | chr7 | Open Sea    | 0.638376189 | 0.944548307 | 0.3061721 | 3.52E-07 |
| cg26388204 | chr7 | Open Sea    | 0.586557048 | 0.891992528 | 0.3054355 | 3.62E-05 |
| cg13723551 | chr7 | Open Sea    | 0.577973679 | 0.882705842 | 0.3047322 | 9.58E-07 |
| cg16477744 | chr7 | North Shore | 0.607087667 | 0.911778769 | 0.3046911 | 1.31E-05 |
| cg08554603 | chr7 | Open Sea    | 0.581115522 | 0.885736946 | 0.3046214 | 8.61E-07 |
| cg14769121 | chr7 | Open Sea    | 0.586888474 | 0.891234687 | 0.3043462 | 0.006308 |
| cg24799764 | chr7 | Open Sea    | 0.492447979 | 0.796674343 | 0.3042264 | 0.005503 |
| cg01556466 | chr7 | Open Sea    | 0.429160953 | 0.733330979 | 0.30417   | 1.59E-07 |
| cg24780236 | chr7 | Open Sea    | 0.500779031 | 0.804573849 | 0.3037948 | 0.023122 |
| cg23860325 | chr7 | Open Sea    | 0.371686053 | 0.675413077 | 0.303727  | 0.008785 |
| cg22967140 | chr7 | Open Sea    | 0.612047071 | 0.915007273 | 0.3029602 | 2.61E-06 |
| cg02022526 | chr7 | South Shore | 0.491257863 | 0.793597241 | 0.3023394 | 1.2E-05  |
| cg10837016 | chr7 | Open Sea    | 0.528833617 | 0.830556256 | 0.3017226 | 0.003508 |
| cg25481630 | chr7 | North Shelf | 0.451346636 | 0.752120999 | 0.3007744 | 0.002141 |
| cg17837572 | chr7 | Open Sea    | 0.628389606 | 0.929108206 | 0.3007186 | 0.000129 |
| cg04258696 | chr7 | Open Sea    | 0.599748713 | 0.900147933 | 0.3003992 | 7.07E-05 |
| cg09277575 | chr7 | Open Sea    | 0.499170652 | 0.799254968 | 0.3000843 | 0.004421 |
| cg22863118 | chr7 | Open Sea    | 0.611338832 | 0.911081148 | 0.2997423 | 3.99E-06 |
| cg02382795 | chr7 | North Shore | 0.31982626  | 0.618107839 | 0.2982816 | 0.011599 |
| cg24681654 | chr7 | Open Sea    | 0.556157866 | 0.854199829 | 0.298042  | 0.000167 |
| cg08904151 | chr7 | South Shelf | 0.594454146 | 0.891929782 | 0.2974756 | 0.000493 |
| cg10688790 | chr7 | Open Sea    | 0.547515074 | 0.844732197 | 0.2972171 | 0.000189 |
| cg20956114 | chr7 | North Shelf | 0.501663534 | 0.798810157 | 0.2971466 | 0.019273 |
| cg01262413 | chr7 | South Shore | 0.520175703 | 0.816449838 | 0.2962741 | 0.001083 |
| cg13436968 | chr7 | Open Sea    | 0.281107126 | 0.577241908 | 0.2961348 | 0.042832 |
| cg23509098 | chr7 | Open Sea    | 0.53638024  | 0.831971812 | 0.2955916 | 5.52E-05 |
| cg14085012 | chr7 | Open Sea    | 0.62480015  | 0.920246962 | 0.2954468 | 1.59E-05 |
| cg11323381 | chr7 | Open Sea    | 0.592502847 | 0.88621787  | 0.293715  | 4.79E-05 |
| cg24384519 | chr7 | Open Sea    | 0.58371077  | 0.876734364 | 0.2930236 | 1.24E-05 |
| cg12127159 | chr7 | Open Sea    | 0.58109438  | 0.874077942 | 0.2929836 | 0.003862 |
| cg24645671 | chr7 | Open Sea    | 0.545253049 | 0.838082762 | 0.2928297 | 0.037979 |
| cg10002850 | chr7 | South Shore | 0.606561198 | 0.898969389 | 0.2924082 | 0.000284 |
| cg18030949 | chr7 | Open Sea    | 0.535141112 | 0.826995379 | 0.2918543 | 2.58E-05 |
| cg10231116 | chr7 | South Shore | 0.584488262 | 0.875411958 | 0.2909237 | 9.29E-05 |
| cg04902838 | chr7 | Open Sea    | 0.594223857 | 0.884592647 | 0.2903688 | 0.000172 |
| cg09085201 | chr7 | Open Sea    | 0.314149809 | 0.604253537 | 0.2901037 | 0.047706 |
| cg20810125 | chr7 | Open Sea    | 0.619653646 | 0.907647048 | 0.2879934 | 3.18E-05 |
| cg05769505 | chr7 | Open Sea    | 0.560392263 | 0.847241793 | 0.2868495 | 2.92E-05 |

|            |      |             |             |             |           |          |
|------------|------|-------------|-------------|-------------|-----------|----------|
| cg06339573 | chr7 | South Shelf | 0.535104546 | 0.821762349 | 0.2866578 | 0.018558 |
| cg00348802 | chr7 | North Shore | 0.484523112 | 0.770280129 | 0.285757  | 0.003244 |
| cg11604519 | chr7 | South Shelf | 0.603859855 | 0.889111191 | 0.2852513 | 1.27E-05 |
| cg22519571 | chr7 | Open Sea    | 0.634260327 | 0.919316514 | 0.2850562 | 5.28E-05 |
| cg10323187 | chr7 | Open Sea    | 0.530753367 | 0.815228674 | 0.2844753 | 0.006475 |
| cg04106190 | chr7 | Open Sea    | 0.630686931 | 0.915061474 | 0.2843745 | 1.8E-05  |
| cg14494365 | chr7 | South Shore | 0.465568569 | 0.749872186 | 0.2843036 | 0.001697 |
| cg01687558 | chr7 | Island      | 0.576076089 | 0.860095802 | 0.2840197 | 8.17E-05 |
| cg18338822 | chr7 | Open Sea    | 0.614530417 | 0.897667865 | 0.2831374 | 8.27E-05 |
| cg16384355 | chr7 | Island      | 0.572427587 | 0.855332651 | 0.2829051 | 0.000436 |
| cg06173509 | chr7 | Open Sea    | 0.586971797 | 0.869490423 | 0.2825186 | 0.002238 |
| cg12157788 | chr7 | Open Sea    | 0.547374486 | 0.829563645 | 0.2821892 | 2.85E-05 |
| cg16341266 | chr7 | Open Sea    | 0.522411207 | 0.804268647 | 0.2818574 | 0.017583 |
| cg22922861 | chr7 | South Shelf | 0.579396478 | 0.860950053 | 0.2815536 | 0.001304 |
| cg00809969 | chr7 | North Shore | 0.5465905   | 0.828089536 | 0.281499  | 0.020304 |
| cg12590535 | chr7 | Open Sea    | 0.291585585 | 0.572738404 | 0.2811528 | 0.047979 |
| cg27396284 | chr7 | Open Sea    | 0.623738749 | 0.904811233 | 0.2810725 | 8.82E-05 |
| cg11003780 | chr7 | Open Sea    | 0.530604969 | 0.810551104 | 0.2799461 | 0.010417 |
| cg18302629 | chr7 | Open Sea    | 0.539076853 | 0.818390993 | 0.2793141 | 1.55E-06 |
| cg00347856 | chr7 | Open Sea    | 0.617590084 | 0.896735892 | 0.2791458 | 9.46E-06 |
| cg17534654 | chr7 | Open Sea    | 0.560040001 | 0.838295016 | 0.278255  | 0.008999 |
| cg23933095 | chr7 | North Shelf | 0.399424823 | 0.677384393 | 0.2779596 | 4.25E-07 |
| cg04018023 | chr7 | Open Sea    | 0.659107449 | 0.936334788 | 0.2772273 | 8.86E-10 |
| cg03527683 | chr7 | Open Sea    | 0.542207692 | 0.819418419 | 0.2772107 | 0.002672 |
| cg25277638 | chr7 | Open Sea    | 0.256593049 | 0.533774167 | 0.2771811 | 3.82E-08 |
| cg15190834 | chr7 | Open Sea    | 0.63204416  | 0.908986733 | 0.2769426 | 5.78E-06 |
| cg18127823 | chr7 | Island      | 0.478107526 | 0.754894646 | 0.2767871 | 2.58E-05 |
| cg06681656 | chr7 | Open Sea    | 0.587795918 | 0.864427731 | 0.2766318 | 1.82E-05 |
| cg13970218 | chr7 | North Shelf | 0.59666611  | 0.873221163 | 0.2765551 | 2.94E-05 |
| cg08514594 | chr7 | Open Sea    | 0.468234974 | 0.744703615 | 0.2764686 | 7.4E-06  |
| cg25225232 | chr7 | South Shore | 0.616278814 | 0.892656561 | 0.2763777 | 8.33E-05 |
| cg22326328 | chr7 | North Shelf | 0.556822703 | 0.832818765 | 0.2759961 | 0.019452 |
| cg25903158 | chr7 | South Shore | 0.116735214 | 0.392654801 | 0.2759196 | 0.046284 |
| cg27517282 | chr7 | Open Sea    | 0.639517819 | 0.914730827 | 0.275213  | 3.52E-05 |
| cg09972052 | chr7 | Open Sea    | 0.344677364 | 0.61919417  | 0.2745168 | 0.002237 |
| cg21537623 | chr7 | Open Sea    | 0.471752024 | 0.745962668 | 0.2742106 | 0.000292 |
| cg25387685 | chr7 | North Shore | 0.574999674 | 0.849052191 | 0.2740525 | 0.001129 |
| cg05289983 | chr7 | Open Sea    | 0.418557183 | 0.69249486  | 0.2739377 | 0.012393 |
| cg22645201 | chr7 | Open Sea    | 0.549747547 | 0.823334321 | 0.2735868 | 0.008583 |
| cg13728287 | chr7 | Open Sea    | 0.619298736 | 0.891479412 | 0.2721807 | 0.002135 |
| cg02292206 | chr7 | North Shore | 0.582102607 | 0.853885136 | 0.2717825 | 0.003532 |
| cg25740250 | chr7 | North Shelf | 0.63576511  | 0.907243766 | 0.2714787 | 0.000198 |
| cg15624274 | chr7 | Open Sea    | 0.566189456 | 0.836896447 | 0.270707  | 9.34E-05 |
| cg00946316 | chr7 | South Shore | 0.618080874 | 0.888429531 | 0.2703487 | 0.000383 |
| cg17822807 | chr7 | Open Sea    | 0.631063942 | 0.901411932 | 0.270348  | 7.32E-05 |
| cg26593067 | chr7 | North Shelf | 0.610876352 | 0.881055854 | 0.2701795 | 3.36E-05 |
| cg00290303 | chr7 | Open Sea    | 0.463699107 | 0.733476777 | 0.2697777 | 0.033376 |
| cg24384632 | chr7 | Open Sea    | 0.64015915  | 0.909257612 | 0.2690985 | 2.3E-05  |
| cg25252482 | chr7 | Open Sea    | 0.614701591 | 0.882959149 | 0.2682576 | 5.74E-05 |
| cg25576789 | chr7 | North Shore | 0.406204425 | 0.674401657 | 0.2681972 | 0.002428 |

|            |      |             |             |             |           |          |
|------------|------|-------------|-------------|-------------|-----------|----------|
| cg02469356 | chr7 | Open Sea    | 0.657025364 | 0.924991444 | 0.2679661 | 2.17E-07 |
| cg03900492 | chr7 | North Shore | 0.56272349  | 0.830654096 | 0.2679306 | 0.006677 |
| cg05399607 | chr7 | Open Sea    | 0.453800872 | 0.721720257 | 0.2679194 | 8.53E-07 |
| cg08889440 | chr7 | Open Sea    | 0.495119406 | 0.762755749 | 0.2676363 | 0.022333 |
| cg04132649 | chr7 | Open Sea    | 0.660181223 | 0.927462118 | 0.2672809 | 0.000146 |
| cg09452483 | chr7 | South Shore | 0.618486445 | 0.885743213 | 0.2672568 | 5.78E-05 |
| cg00238283 | chr7 | North Shore | 0.629694646 | 0.896420234 | 0.2667256 | 0.000136 |
| cg04503054 | chr7 | Open Sea    | 0.646069888 | 0.912008108 | 0.2659382 | 4.52E-05 |
| cg17701991 | chr7 | Open Sea    | 0.615506469 | 0.880835335 | 0.2653289 | 0.000117 |
| cg25325543 | chr7 | Open Sea    | 0.635457647 | 0.900538793 | 0.2650811 | 0.000116 |
| cg05970317 | chr7 | Open Sea    | 0.643831427 | 0.908869947 | 0.2650385 | 8.98E-05 |
| cg22368281 | chr7 | North Shore | 0.445368381 | 0.710118595 | 0.2647502 | 0.003159 |
| cg12210457 | chr7 | Open Sea    | 0.672210671 | 0.936699472 | 0.2644888 | 6.33E-05 |
| cg11010397 | chr7 | South Shore | 0.599950302 | 0.864417226 | 0.2644669 | 0.011589 |
| cg14432251 | chr7 | North Shore | 0.560199204 | 0.82303346  | 0.2628343 | 0.001047 |
| cg00043591 | chr7 | South Shelf | 0.518226328 | 0.780728548 | 0.2625022 | 0.02012  |
| cg03372042 | chr7 | Open Sea    | 0.545672936 | 0.807624972 | 0.261952  | 0.003878 |
| cg01693328 | chr7 | South Shelf | 0.448107812 | 0.709732387 | 0.2616246 | 0.042966 |
| cg11147724 | chr7 | South Shore | 0.617898876 | 0.878487425 | 0.2605885 | 0.000703 |
| cg27282206 | chr7 | Open Sea    | 0.637809332 | 0.898120991 | 0.2603117 | 1.22E-06 |
| cg24965322 | chr7 | Open Sea    | 0.658592439 | 0.918758407 | 0.260166  | 1.73E-05 |
| cg25565476 | chr7 | Open Sea    | 0.435060548 | 0.695185444 | 0.2601249 | 0.00098  |
| cg07012178 | chr7 | South Shelf | 0.503328488 | 0.763339854 | 0.2600114 | 0.018465 |
| cg06228260 | chr7 | Open Sea    | 0.489921982 | 0.749618944 | 0.259697  | 1.24E-06 |
| cg22719826 | chr7 | Open Sea    | 0.567819664 | 0.826649669 | 0.25883   | 0.035571 |
| cg22424532 | chr7 | South Shore | 0.624242508 | 0.882821893 | 0.2585794 | 0.000861 |
| cg19404207 | chr7 | Open Sea    | 0.616975407 | 0.875348687 | 0.2583733 | 0.000583 |
| cg01268345 | chr7 | Open Sea    | 0.623788944 | 0.882092293 | 0.2583033 | 0.000202 |
| cg21005410 | chr7 | Open Sea    | 0.643918261 | 0.902121656 | 0.2582034 | 2.92E-05 |
| cg21700772 | chr7 | South Shore | 0.328409779 | 0.586321346 | 0.2579116 | 0.008705 |
| cg22598247 | chr7 | South Shelf | 0.607281595 | 0.864956272 | 0.2576747 | 0.000611 |
| cg21006425 | chr7 | North Shelf | 0.438394638 | 0.695968577 | 0.2575739 | 6.47E-08 |
| cg02007867 | chr7 | Open Sea    | 0.501738885 | 0.758991546 | 0.2572527 | 0.008215 |
| cg19529583 | chr7 | Open Sea    | 0.438357365 | 0.694872086 | 0.2565147 | 0.035491 |
| cg18395623 | chr7 | Open Sea    | 0.571160036 | 0.827619036 | 0.256459  | 0.004361 |
| cg26427498 | chr7 | Open Sea    | 0.461827619 | 0.717831201 | 0.2560036 | 2.64E-05 |
| cg16858211 | chr7 | Open Sea    | 0.591223293 | 0.847110161 | 0.2558869 | 0.007905 |
| cg18156136 | chr7 | Open Sea    | 0.552908036 | 0.807348323 | 0.2544403 | 0.039273 |
| cg09936218 | chr7 | Open Sea    | 0.583148757 | 0.837536321 | 0.2543876 | 0.006533 |
| cg23453466 | chr7 | Open Sea    | 0.650813566 | 0.90499294  | 0.2541794 | 6.24E-05 |
| cg19679302 | chr7 | North Shelf | 0.643964221 | 0.897957002 | 0.2539928 | 0.000247 |
| cg09450352 | chr7 | South Shore | 0.615562003 | 0.869342811 | 0.2537808 | 8.14E-05 |
| cg24703706 | chr7 | Open Sea    | 0.552767999 | 0.806412555 | 0.2536446 | 0.000264 |
| cg10502354 | chr7 | North Shelf | 0.667850029 | 0.921481044 | 0.253631  | 0.000391 |
| cg00297282 | chr7 | South Shore | 0.602573404 | 0.855946797 | 0.2533734 | 4.35E-05 |
| cg02941085 | chr7 | North Shore | 0.607087954 | 0.86042367  | 0.2533357 | 0.005999 |
| cg12364136 | chr7 | Open Sea    | 0.478309815 | 0.730963265 | 0.2526534 | 0.012037 |
| cg18913924 | chr7 | South Shore | 0.598855706 | 0.851086536 | 0.2522308 | 3.48E-06 |
| cg22958018 | chr7 | Open Sea    | 0.668396346 | 0.920436515 | 0.2520402 | 2.03E-05 |
| cg00110846 | chr7 | North Shore | 0.628598581 | 0.880411125 | 0.2518125 | 0.000319 |



|            |      |             |             |             |           |          |
|------------|------|-------------|-------------|-------------|-----------|----------|
| cg02516134 | chr7 | Open Sea    | 0.595733392 | 0.847356601 | 0.2516232 | 5.9E-05  |
| cg10046101 | chr7 | Open Sea    | 0.657149642 | 0.90872414  | 0.2515745 | 3.45E-06 |
| cg15319585 | chr7 | South Shelf | 0.636670524 | 0.888192688 | 0.2515222 | 0.000138 |
| cg14397500 | chr7 | Open Sea    | 0.607969659 | 0.859481192 | 0.2515115 | 0.048152 |
| cg13828236 | chr7 | North Shore | 0.638860487 | 0.890174163 | 0.2513137 | 4.8E-05  |
| cg16866485 | chr7 | Open Sea    | 0.652961801 | 0.904187686 | 0.2512259 | 0.000735 |
| cg14561985 | chr7 | North Shore | 0.645617807 | 0.896273829 | 0.250656  | 3.21E-05 |
| cg24996491 | chr7 | Open Sea    | 0.445762659 | 0.696413965 | 0.2506513 | 0.000421 |
| cg19954227 | chr7 | South Shelf | 0.640492036 | 0.890676258 | 0.2501842 | 0.004859 |
| cg22821554 | chr7 | Open Sea    | 0.622570437 | 0.872439373 | 0.2498689 | 0.00026  |
| cg27092605 | chr7 | Open Sea    | 0.535241545 | 0.783858617 | 0.2486171 | 0.000146 |
| cg11344729 | chr7 | Open Sea    | 0.588611992 | 0.836921855 | 0.2483099 | 0.000273 |
| cg20177507 | chr7 | Open Sea    | 0.528693938 | 0.776952885 | 0.2482589 | 0.000254 |
| cg11932205 | chr7 | Open Sea    | 0.521603089 | 0.769656127 | 0.248053  | 1.48E-05 |
| cg00080060 | chr7 | Open Sea    | 0.647668643 | 0.895714723 | 0.2480461 | 0.000115 |
| cg23184226 | chr7 | North Shore | 0.56456682  | 0.812571091 | 0.2480043 | 6.86E-05 |
| cg08441248 | chr7 | South Shore | 0.670837377 | 0.918122035 | 0.2472847 | 0.000119 |
| cg15975151 | chr7 | Open Sea    | 0.672301185 | 0.919285573 | 0.2469844 | 0.001295 |
| cg18195165 | chr7 | North Shelf | 0.631391257 | 0.878358032 | 0.2469668 | 1.86E-05 |
| cg18315831 | chr7 | North Shore | 0.668337891 | 0.914983679 | 0.2466458 | 9.67E-05 |
| cg09137718 | chr7 | Open Sea    | 0.511237003 | 0.757396839 | 0.2461598 | 0.017078 |
| cg16997642 | chr7 | Island      | 0.553630328 | 0.799773047 | 0.2461427 | 0.002452 |
| cg09650495 | chr7 | North Shelf | 0.272271614 | 0.517821848 | 0.2455502 | 0.004585 |
| cg09235185 | chr7 | South Shore | 0.642599479 | 0.888102975 | 0.2455035 | 0.006605 |
| cg00574379 | chr7 | Open Sea    | 0.408123435 | 0.653281822 | 0.2451584 | 0.049361 |
| cg23808337 | chr7 | Open Sea    | 0.563022701 | 0.807968928 | 0.2449462 | 0.0027   |
| cg26051165 | chr7 | Open Sea    | 0.625988611 | 0.870877816 | 0.2448892 | 0.009889 |
| cg24603439 | chr7 | Open Sea    | 0.648406751 | 0.892562925 | 0.2441562 | 3.31E-05 |
| cg16670736 | chr7 | Open Sea    | 0.60080557  | 0.844555737 | 0.2437502 | 0.000422 |
| cg03108373 | chr7 | Open Sea    | 0.425164019 | 0.668223669 | 0.2430597 | 0.00174  |
| cg04996300 | chr7 | North Shore | 0.529609188 | 0.772438721 | 0.2428295 | 0.00122  |
| cg24873202 | chr7 | Open Sea    | 0.604029712 | 0.846837097 | 0.2428074 | 0.012744 |
| cg09480446 | chr7 | North Shore | 0.633313611 | 0.876035272 | 0.2427217 | 8.29E-05 |
| cg01723575 | chr7 | North Shore | 0.448682603 | 0.691190681 | 0.2425081 | 0.004142 |
| cg08319291 | chr7 | Open Sea    | 0.583609967 | 0.825944584 | 0.2423346 | 1.86E-05 |
| cg00397871 | chr7 | Open Sea    | 0.644915848 | 0.887063993 | 0.2421481 | 2.94E-05 |
| cg21619594 | chr7 | Open Sea    | 0.629947339 | 0.871727972 | 0.2417806 | 0.000283 |
| cg02582587 | chr7 | Open Sea    | 0.666365163 | 0.907984644 | 0.2416195 | 0.00011  |
| cg23990124 | chr7 | North Shelf | 0.665618071 | 0.907207461 | 0.2415894 | 1.67E-06 |
| cg22575043 | chr7 | Open Sea    | 0.484123078 | 0.725059606 | 0.2409365 | 0.00148  |
| cg08450080 | chr7 | South Shore | 0.653621341 | 0.894525509 | 0.2409042 | 0.000173 |
| cg17533563 | chr7 | Open Sea    | 0.535415333 | 0.776311636 | 0.2408963 | 0.017407 |
| cg15540496 | chr7 | Open Sea    | 0.641215546 | 0.881798596 | 0.2405831 | 0.000113 |
| cg03114899 | chr7 | South Shelf | 0.545416245 | 0.785941773 | 0.2405255 | 0.000969 |
| cg09768617 | chr7 | Open Sea    | 0.665955495 | 0.906216939 | 0.2402614 | 0.001505 |
| cg09117442 | chr7 | North Shore | 0.637710652 | 0.877934388 | 0.2402237 | 0.005075 |
| cg14369780 | chr7 | Open Sea    | 0.640861484 | 0.880952407 | 0.2400909 | 0.029972 |
| cg20680284 | chr7 | South Shelf | 0.457382464 | 0.697273    | 0.2398905 | 6.92E-06 |
| cg09220440 | chr7 | Open Sea    | 0.640319835 | 0.879928337 | 0.2396085 | 0.000207 |
| cg10879854 | chr7 | Open Sea    | 0.647124849 | 0.886303095 | 0.2391782 | 0.000409 |

|            |      |             |             |             |           |          |
|------------|------|-------------|-------------|-------------|-----------|----------|
| cg22724153 | chr7 | Open Sea    | 0.547200461 | 0.786156853 | 0.2389564 | 0.001639 |
| cg07341813 | chr7 | North Shore | 0.644950018 | 0.883348891 | 0.2383989 | 0.000641 |
| cg25520440 | chr7 | Open Sea    | 0.553310777 | 0.791519863 | 0.2382091 | 0.002808 |
| cg24872851 | chr7 | Open Sea    | 0.674563511 | 0.9125824   | 0.2380189 | 0.000312 |
| cg26733975 | chr7 | Island      | 0.506747068 | 0.744758982 | 0.2380119 | 0.041421 |
| cg06649856 | chr7 | Open Sea    | 0.457361515 | 0.695023471 | 0.237662  | 0.007975 |
| cg09623773 | chr7 | South Shore | 0.46327491  | 0.700928633 | 0.2376537 | 0.024363 |
| cg27570992 | chr7 | Open Sea    | 0.671641262 | 0.909278228 | 0.237637  | 0.002454 |
| cg18733925 | chr7 | Open Sea    | 0.619769461 | 0.857269906 | 0.2375004 | 0.000678 |
| cg06621425 | chr7 | South Shore | 0.411444119 | 0.64888475  | 0.2374406 | 0.030721 |
| cg12904569 | chr7 | Open Sea    | 0.682948124 | 0.920116457 | 0.2371683 | 0.000491 |
| cg18934443 | chr7 | North Shore | 0.280273336 | 0.51677605  | 0.2365027 | 4.42E-07 |
| cg09404689 | chr7 | South Shelf | 0.67732985  | 0.91380003  | 0.2364702 | 0.000171 |
| cg21124530 | chr7 | Open Sea    | 0.699872064 | 0.936038517 | 0.2361665 | 5.74E-05 |
| cg10094907 | chr7 | Open Sea    | 0.562590789 | 0.798387377 | 0.2357966 | 1.63E-05 |
| cg27168114 | chr7 | North Shore | 0.629936826 | 0.865307686 | 0.2353709 | 0.00576  |
| cg23740652 | chr7 | South Shore | 0.48508085  | 0.720451082 | 0.2353702 | 0.01016  |
| cg15698691 | chr7 | Open Sea    | 0.328812603 | 0.563935278 | 0.2351227 | 2.35E-05 |
| cg08261841 | chr7 | North Shelf | 0.682643602 | 0.917513624 | 0.23487   | 0.00025  |
| cg03436722 | chr7 | North Shore | 0.61706464  | 0.851646521 | 0.2345819 | 0.037501 |
| cg23235971 | chr7 | North Shore | 0.599200668 | 0.83377886  | 0.2345782 | 0.000152 |
| cg20360285 | chr7 | Open Sea    | 0.5883771   | 0.822867028 | 0.2344899 | 0.02619  |
| cg00967316 | chr7 | Open Sea    | 0.566321299 | 0.800680852 | 0.2343596 | 0.000667 |
| cg26061674 | chr7 | Open Sea    | 0.65997083  | 0.894317039 | 0.2343462 | 0.00108  |
| cg16132546 | chr7 | Open Sea    | 0.620803945 | 0.85490778  | 0.2341038 | 0.000213 |
| cg03962846 | chr7 | Open Sea    | 0.635552629 | 0.869242368 | 0.2336897 | 0.000582 |
| cg11738921 | chr7 | North Shore | 0.463744851 | 0.696937815 | 0.233193  | 0.003414 |
| cg02161503 | chr7 | North Shore | 0.546675002 | 0.779628446 | 0.2329534 | 0.026135 |
| cg03310594 | chr7 | North Shore | 0.611303707 | 0.843888163 | 0.2325845 | 0.000906 |
| cg06853230 | chr7 | Open Sea    | 0.603299099 | 0.835796208 | 0.2324971 | 0.024089 |
| cg19237600 | chr7 | Open Sea    | 0.61716377  | 0.84914225  | 0.2319785 | 0.001469 |
| cg01119452 | chr7 | Open Sea    | 0.232521138 | 0.464309282 | 0.2317881 | 0.005116 |
| cg15066837 | chr7 | Open Sea    | 0.59702473  | 0.828779878 | 0.2317551 | 0.010684 |
| cg00368924 | chr7 | North Shore | 0.640828108 | 0.872466203 | 0.2316381 | 0.015721 |
| cg08903389 | chr7 | Open Sea    | 0.68495339  | 0.916000361 | 0.231047  | 0.001537 |
| cg05774699 | chr7 | Island      | 0.502667351 | 0.73357835  | 0.230911  | 0.042668 |
| cg25570411 | chr7 | Open Sea    | 0.680938394 | 0.91119648  | 0.2302581 | 0.000886 |
| cg15082875 | chr7 | North Shelf | 0.538786454 | 0.768784367 | 0.2299979 | 0.00042  |
| cg05243629 | chr7 | Open Sea    | 0.654261972 | 0.88412462  | 0.2298626 | 0.001309 |
| cg16598668 | chr7 | Open Sea    | 0.676740078 | 0.906599247 | 0.2298592 | 4.62E-05 |
| cg22308970 | chr7 | Open Sea    | 0.662608493 | 0.892035302 | 0.2294268 | 0.000106 |
| cg12781086 | chr7 | Island      | 0.653125771 | 0.882490829 | 0.2293651 | 0.004362 |
| cg16098921 | chr7 | Open Sea    | 0.638509346 | 0.867686156 | 0.2291768 | 0.040012 |
| cg11611127 | chr7 | Open Sea    | 0.606518899 | 0.835405168 | 0.2288863 | 0.026927 |
| cg08567182 | chr7 | Open Sea    | 0.62882954  | 0.856681123 | 0.2278516 | 0.026323 |
| cg00252814 | chr7 | North Shore | 0.60377487  | 0.83150601  | 0.2277311 | 0.002491 |
| cg16810272 | chr7 | South Shore | 0.503422982 | 0.731112338 | 0.2276894 | 0.003626 |
| cg12556325 | chr7 | Open Sea    | 0.504739909 | 0.732345267 | 0.2276054 | 0.000177 |
| cg09508476 | chr7 | South Shore | 0.486150622 | 0.713287608 | 0.227137  | 0.03662  |
| cg22433447 | chr7 | Open Sea    | 0.684769789 | 0.91185759  | 0.2270878 | 0.000921 |

|            |      |             |             |             |           |          |
|------------|------|-------------|-------------|-------------|-----------|----------|
| cg00961325 | chr7 | Open Sea    | 0.596897422 | 0.823827306 | 0.2269299 | 0.001022 |
| cg11202422 | chr7 | Open Sea    | 0.679023822 | 0.905948336 | 0.2269245 | 0.000279 |
| cg09460345 | chr7 | Open Sea    | 0.589121469 | 0.816043282 | 0.2269218 | 0.01159  |
| cg19260567 | chr7 | Open Sea    | 0.43252327  | 0.659416216 | 0.2268929 | 0.039494 |
| cg24306397 | chr7 | Open Sea    | 0.566687379 | 0.793462865 | 0.2267755 | 0.034967 |
| cg06902367 | chr7 | Open Sea    | 0.551508371 | 0.77824746  | 0.2267391 | 0.005215 |
| cg04062190 | chr7 | North Shelf | 0.302764468 | 0.528852863 | 0.2260884 | 0.013847 |
| cg16910042 | chr7 | Open Sea    | 0.623650379 | 0.849256587 | 0.2256062 | 0.022593 |
| cg02902770 | chr7 | South Shore | 0.626489206 | 0.851913176 | 0.225424  | 0.021901 |
| cg13102133 | chr7 | Open Sea    | 0.618570176 | 0.843888758 | 0.2253186 | 0.045737 |
| cg23703687 | chr7 | Open Sea    | 0.539130253 | 0.76425966  | 0.2251294 | 0.001705 |
| cg12187687 | chr7 | Island      | 0.646261589 | 0.871276222 | 0.2250146 | 0.010774 |
| cg15743325 | chr7 | Open Sea    | 0.676067832 | 0.900991226 | 0.2249234 | 0.001252 |
| cg14100398 | chr7 | Open Sea    | 0.597436238 | 0.822141102 | 0.2247049 | 0.001539 |
| cg15874704 | chr7 | Open Sea    | 0.643262655 | 0.867862001 | 0.2245993 | 0.006476 |
| cg25975382 | chr7 | Open Sea    | 0.582677363 | 0.806905713 | 0.2242284 | 0.000378 |
| cg17447514 | chr7 | Open Sea    | 0.700645871 | 0.924522586 | 0.2238767 | 0.00396  |
| cg22535084 | chr7 | South Shelf | 0.638476294 | 0.86205539  | 0.2235791 | 0.026934 |
| cg08792423 | chr7 | South Shore | 0.674326612 | 0.897791976 | 0.2234654 | 0.000641 |
| cg09434085 | chr7 | Island      | 0.625067535 | 0.848395971 | 0.2233284 | 0.000712 |
| cg18971054 | chr7 | Open Sea    | 0.628745746 | 0.852053112 | 0.2233074 | 0.001018 |
| cg16769489 | chr7 | North Shore | 0.67738283  | 0.90048745  | 0.2231046 | 4.08E-05 |
| cg07496621 | chr7 | Open Sea    | 0.523759625 | 0.746834309 | 0.2230747 | 0.022298 |
| cg07138024 | chr7 | Open Sea    | 0.591989157 | 0.814663804 | 0.2226746 | 0.000241 |
| cg21660861 | chr7 | Open Sea    | 0.697811316 | 0.920442516 | 0.2226312 | 0.000921 |
| cg26321153 | chr7 | Open Sea    | 0.699564375 | 0.922139633 | 0.2225753 | 0.001444 |
| cg23178546 | chr7 | Open Sea    | 0.631796091 | 0.853826073 | 0.22203   | 0.001965 |
| cg14168009 | chr7 | Open Sea    | 0.579219541 | 0.801226487 | 0.2220069 | 7.47E-05 |
| cg20265953 | chr7 | Open Sea    | 0.63900778  | 0.860746078 | 0.2217383 | 0.002082 |
| cg10259619 | chr7 | Open Sea    | 0.625018704 | 0.846605134 | 0.2215864 | 0.001482 |
| cg18871179 | chr7 | North Shelf | 0.578876606 | 0.800410132 | 0.2215335 | 0.000171 |
| cg09498134 | chr7 | North Shore | 0.614331208 | 0.835714375 | 0.2213832 | 7.22E-05 |
| cg16308148 | chr7 | Open Sea    | 0.686576813 | 0.90788291  | 0.2213061 | 0.000195 |
| cg02066184 | chr7 | Open Sea    | 0.696484717 | 0.917737394 | 0.2212527 | 1.14E-05 |
| cg24646841 | chr7 | Open Sea    | 0.664474053 | 0.885598823 | 0.2211248 | 0.00091  |
| cg23112423 | chr7 | Open Sea    | 0.682084148 | 0.902441644 | 0.2203575 | 0.000254 |
| cg04471202 | chr7 | Open Sea    | 0.639389007 | 0.859582458 | 0.2201935 | 0.011905 |
| cg18684641 | chr7 | Open Sea    | 0.600839465 | 0.820916463 | 0.220077  | 0.004169 |
| cg00308440 | chr7 | Open Sea    | 0.66237434  | 0.88226706  | 0.2198927 | 0.000403 |
| cg15641398 | chr7 | South Shore | 0.499001138 | 0.717934354 | 0.2189332 | 0.027648 |
| cg25322489 | chr7 | North Shore | 0.699427039 | 0.918295261 | 0.2188682 | 0.000852 |
| cg18100008 | chr7 | North Shelf | 0.617636786 | 0.836389522 | 0.2187527 | 0.032359 |
| cg26800802 | chr7 | Open Sea    | 0.645015868 | 0.863644717 | 0.2186288 | 0.007711 |
| cg09299053 | chr7 | Open Sea    | 0.650158783 | 0.868707036 | 0.2185483 | 0.000501 |
| cg21063500 | chr7 | North Shore | 0.43189066  | 0.650353739 | 0.2184631 | 0.000219 |
| cg24624586 | chr7 | Open Sea    | 0.533670959 | 0.752102916 | 0.218432  | 0.023946 |
| cg10471944 | chr7 | North Shore | 0.60717683  | 0.825559165 | 0.2183823 | 0.014297 |
| cg18944653 | chr7 | Open Sea    | 0.449730803 | 0.6679879   | 0.2182571 | 0.000978 |
| cg22620803 | chr7 | Open Sea    | 0.643346017 | 0.861576207 | 0.2182302 | 0.01524  |
| cg22648375 | chr7 | North Shelf | 0.647113069 | 0.865072448 | 0.2179594 | 0.000412 |

|            |      |             |             |             |           |          |
|------------|------|-------------|-------------|-------------|-----------|----------|
| cg04358834 | chr7 | Open Sea    | 0.704231431 | 0.922016114 | 0.2177847 | 0.000881 |
| cg21546532 | chr7 | Open Sea    | 0.587893835 | 0.805665171 | 0.2177713 | 0.033649 |
| cg20304988 | chr7 | South Shelf | 0.66536571  | 0.883099856 | 0.2177341 | 0.000481 |
| cg03170878 | chr7 | North Shore | 0.651488648 | 0.868823674 | 0.217335  | 0.000695 |
| cg21144589 | chr7 | South Shore | 0.66454751  | 0.881874096 | 0.2173266 | 7.49E-06 |
| cg22213057 | chr7 | South Shore | 0.679216437 | 0.896445167 | 0.2172287 | 0.037812 |
| cg19480385 | chr7 | Open Sea    | 0.377872901 | 0.594976808 | 0.2171039 | 0.001987 |
| cg06527154 | chr7 | Open Sea    | 0.649870662 | 0.866157571 | 0.2162869 | 0.004669 |
| cg26801037 | chr7 | Island      | 0.549905899 | 0.766101283 | 0.2161954 | 0.049843 |
| cg18297044 | chr7 | Open Sea    | 0.501417399 | 0.717391036 | 0.2159736 | 0.005899 |
| cg12297440 | chr7 | North Shore | 0.644097134 | 0.859850406 | 0.2157533 | 0.025337 |
| cg21643731 | chr7 | Open Sea    | 0.64117808  | 0.856714033 | 0.215536  | 0.000628 |
| cg00830401 | chr7 | Open Sea    | 0.572203153 | 0.787732092 | 0.2155289 | 0.012643 |
| cg25077137 | chr7 | South Shore | 0.657609799 | 0.873056962 | 0.2154472 | 0.010981 |
| cg02770061 | chr7 | Open Sea    | 0.672753779 | 0.887954092 | 0.2152003 | 0.012085 |
| cg14691364 | chr7 | Open Sea    | 0.543631396 | 0.758781355 | 0.21515   | 0.034815 |
| cg12144852 | chr7 | Island      | 0.689380327 | 0.904358072 | 0.2149777 | 0.001804 |
| cg11364256 | chr7 | Island      | 0.687391561 | 0.902354391 | 0.2149628 | 0.000894 |
| cg26554834 | chr7 | Open Sea    | 0.689423318 | 0.904383474 | 0.2149602 | 0.001533 |
| cg03436967 | chr7 | Open Sea    | 0.658721607 | 0.87340201  | 0.2146804 | 0.010809 |
| cg26756862 | chr7 | Open Sea    | 0.666734718 | 0.881353951 | 0.2146192 | 0.00559  |
| cg01718785 | chr7 | North Shelf | 0.701178995 | 0.915797213 | 0.2146182 | 0.000491 |
| cg07762347 | chr7 | Open Sea    | 0.648187    | 0.862677939 | 0.2144909 | 0.005516 |
| cg25969460 | chr7 | Open Sea    | 0.61500805  | 0.829461052 | 0.214453  | 0.004928 |
| cg22586324 | chr7 | Open Sea    | 0.658034645 | 0.872368492 | 0.2143338 | 0.011829 |
| cg22376214 | chr7 | South Shelf | 0.624175905 | 0.838490839 | 0.2143149 | 0.001089 |
| cg08151051 | chr7 | Open Sea    | 0.680690684 | 0.894930051 | 0.2142394 | 0.00145  |
| cg06261500 | chr7 | Open Sea    | 0.672170062 | 0.886336624 | 0.2141666 | 0.000403 |
| cg07927098 | chr7 | Open Sea    | 0.561647129 | 0.775744988 | 0.2140979 | 0.000388 |
| cg06322983 | chr7 | North Shore | 0.65853516  | 0.872574406 | 0.2140392 | 0.000486 |
| cg19286989 | chr7 | Open Sea    | 0.558787931 | 0.772776715 | 0.2139888 | 0.006138 |
| cg01643690 | chr7 | Open Sea    | 0.39998309  | 0.613824007 | 0.2138409 | 1.26E-05 |
| cg05316785 | chr7 | North Shelf | 0.356210752 | 0.569680718 | 0.21347   | 0.004091 |
| cg19212465 | chr7 | Open Sea    | 0.589410805 | 0.802774775 | 0.213364  | 0.000116 |
| cg08246366 | chr7 | South Shelf | 0.660228369 | 0.873164554 | 0.2129362 | 0.002765 |
| cg13124080 | chr7 | Open Sea    | 0.644045916 | 0.856977882 | 0.212932  | 0.019349 |
| cg16697850 | chr7 | Open Sea    | 0.400550929 | 0.613449013 | 0.2128981 | 0.042916 |
| cg14898611 | chr7 | Open Sea    | 0.681087987 | 0.893830533 | 0.2127425 | 0.008015 |
| cg05794556 | chr7 | Open Sea    | 0.648991661 | 0.861637587 | 0.2126459 | 0.001218 |
| cg04430775 | chr7 | South Shelf | 0.506508802 | 0.718995663 | 0.2124869 | 3.83E-05 |
| cg18023455 | chr7 | Open Sea    | 0.241752942 | 0.454094666 | 0.2123417 | 0.006749 |
| cg05769086 | chr7 | Open Sea    | 0.649213582 | 0.861549217 | 0.2123356 | 0.000817 |
| cg20497212 | chr7 | Open Sea    | 0.54663731  | 0.758802532 | 0.2121652 | 0.015459 |
| cg00187120 | chr7 | North Shore | 0.417502237 | 0.62936245  | 0.2118602 | 3.07E-06 |
| cg11645318 | chr7 | South Shelf | 0.695969289 | 0.907739597 | 0.2117703 | 0.000782 |
| cg11522069 | chr7 | Open Sea    | 0.616155685 | 0.827919619 | 0.2117639 | 0.001004 |
| cg06987246 | chr7 | North Shelf | 0.58771761  | 0.799315072 | 0.2115975 | 0.041634 |
| cg07670722 | chr7 | Open Sea    | 0.622529009 | 0.833982744 | 0.2114537 | 0.021318 |
| cg18633471 | chr7 | Island      | 0.54916399  | 0.760534253 | 0.2113703 | 3.85E-05 |
| cg11470337 | chr7 | Open Sea    | 0.626211657 | 0.837435867 | 0.2112242 | 0.000178 |

|            |      |             |             |             |           |          |
|------------|------|-------------|-------------|-------------|-----------|----------|
| cg26639747 | chr7 | North Shelf | 0.682025095 | 0.893027979 | 0.2110029 | 0.000323 |
| cg26268565 | chr7 | Open Sea    | 0.623308365 | 0.834240205 | 0.2109318 | 0.005316 |
| cg07037223 | chr7 | Island      | 0.673224601 | 0.8841447   | 0.2109201 | 3.08E-05 |
| cg23862011 | chr7 | Open Sea    | 0.612482384 | 0.823297983 | 0.2108156 | 0.020636 |
| cg04776860 | chr7 | Open Sea    | 0.712976034 | 0.923645874 | 0.2106698 | 0.002559 |
| cg26277197 | chr7 | Open Sea    | 0.616911491 | 0.827418913 | 0.2105074 | 9.47E-05 |
| cg10249542 | chr7 | Open Sea    | 0.618743456 | 0.829109058 | 0.2103656 | 0.030604 |
| cg27096172 | chr7 | South Shore | 0.528233164 | 0.738492941 | 0.2102598 | 0.002681 |
| cg19761458 | chr7 | South Shore | 0.669923898 | 0.880163609 | 0.2102397 | 1.12E-05 |
| cg18119803 | chr7 | Open Sea    | 0.612977246 | 0.823142532 | 0.2101653 | 0.000531 |
| cg00159289 | chr7 | North Shore | 0.578941188 | 0.78890769  | 0.2099665 | 0.01416  |
| cg19369262 | chr7 | Open Sea    | 0.666957449 | 0.876543799 | 0.2095863 | 0.006904 |
| cg26389638 | chr7 | Open Sea    | 0.652184445 | 0.861724116 | 0.2095397 | 0.001297 |
| cg13595211 | chr7 | Open Sea    | 0.635362279 | 0.844874252 | 0.209512  | 0.041022 |
| cg23454797 | chr7 | Island      | 0.41423636  | 0.623550463 | 0.2093141 | 0.006969 |
| cg18581663 | chr7 | Open Sea    | 0.666795801 | 0.875312744 | 0.2085169 | 0.001486 |
| cg26945725 | chr7 | Open Sea    | 0.662142669 | 0.87064343  | 0.2085008 | 0.000141 |
| cg21643217 | chr7 | Open Sea    | 0.659892143 | 0.868331455 | 0.2084393 | 0.003288 |
| cg03276000 | chr7 | Open Sea    | 0.576844348 | 0.78506721  | 0.2082229 | 0.011829 |
| cg11535869 | chr7 | Open Sea    | 0.611033077 | 0.819084078 | 0.208051  | 0.038754 |
| cg16918529 | chr7 | Open Sea    | 0.67084794  | 0.87885673  | 0.2080088 | 0.011566 |
| cg26102295 | chr7 | North Shore | 0.596995609 | 0.804748863 | 0.2077533 | 0.02937  |
| cg11715858 | chr7 | North Shore | 0.44744133  | 0.654993122 | 0.2075518 | 0.000212 |
| cg13877930 | chr7 | North Shore | 0.523875541 | 0.731408532 | 0.207533  | 0.049147 |
| cg14163049 | chr7 | Open Sea    | 0.378714442 | 0.586245152 | 0.2075307 | 0.000631 |
| cg22054793 | chr7 | South Shelf | 0.610093457 | 0.817160491 | 0.207067  | 0.008554 |
| cg18850427 | chr7 | Open Sea    | 0.716158556 | 0.92306963  | 0.2069111 | 0.000333 |
| cg21375490 | chr7 | South Shore | 0.712593643 | 0.919282616 | 0.206689  | 0.000709 |
| cg17006281 | chr7 | South Shelf | 0.610783481 | 0.817368344 | 0.2065849 | 0.003496 |
| cg11337742 | chr7 | North Shelf | 0.713470174 | 0.919874349 | 0.2064042 | 0.005349 |
| cg10860802 | chr7 | Open Sea    | 0.61444545  | 0.820249164 | 0.2058037 | 0.032727 |
| cg15094119 | chr7 | Island      | 0.386418832 | 0.592157674 | 0.2057388 | 0.01447  |
| cg13433644 | chr7 | Open Sea    | 0.727005313 | 0.932627225 | 0.2056219 | 0.000873 |
| cg08599824 | chr7 | Open Sea    | 0.625159048 | 0.830771283 | 0.2056122 | 0.009384 |
| cg23874775 | chr7 | Open Sea    | 0.650820938 | 0.85641348  | 0.2055925 | 0.010685 |
| cg01314306 | chr7 | South Shelf | 0.629580071 | 0.835064241 | 0.2054842 | 0.000126 |
| cg12083122 | chr7 | South Shelf | 0.689265316 | 0.894488964 | 0.2052236 | 0.00149  |
| cg15899053 | chr7 | Open Sea    | 0.691704861 | 0.896403957 | 0.2046991 | 0.000736 |
| cg06592333 | chr7 | Open Sea    | 0.699864849 | 0.904539945 | 0.2046751 | 0.001267 |
| cg15652683 | chr7 | South Shore | 0.520159674 | 0.724788952 | 0.2046293 | 0.033059 |
| cg11969108 | chr7 | North Shelf | 0.394090731 | 0.598672645 | 0.2045819 | 0.011513 |
| cg01645995 | chr7 | Open Sea    | 0.641655384 | 0.84608665  | 0.2044313 | 0.010055 |
| cg22584618 | chr7 | Island      | 0.126955102 | 0.33135473  | 0.2043996 | 3.32E-05 |
| cg07120972 | chr7 | Open Sea    | 0.700081944 | 0.904025387 | 0.2039434 | 0.000344 |
| cg23705098 | chr7 | South Shelf | 0.209438857 | 0.413304461 | 0.2038656 | 0.011162 |
| cg24300154 | chr7 | Open Sea    | 0.447868935 | 0.65166735  | 0.2037984 | 0.000383 |
| cg10691109 | chr7 | Open Sea    | 0.30341594  | 0.507175493 | 0.2037596 | 0.013139 |
| cg15443791 | chr7 | Open Sea    | 0.662659066 | 0.866199944 | 0.2035409 | 0.000388 |
| cg05130081 | chr7 | Open Sea    | 0.480515436 | 0.683854146 | 0.2033387 | 0.007334 |
| cg24294950 | chr7 | Open Sea    | 0.222341285 | 0.425544369 | 0.2032031 | 0.034628 |

|            |      |             |             |             |           |          |
|------------|------|-------------|-------------|-------------|-----------|----------|
| cg14741855 | chr7 | Open Sea    | 0.702176575 | 0.905273974 | 0.2030974 | 0.001298 |
| cg25805770 | chr7 | Open Sea    | 0.665748706 | 0.868567835 | 0.2028191 | 0.013389 |
| cg10681483 | chr7 | Open Sea    | 0.599246657 | 0.80200896  | 0.2027623 | 0.047786 |
| cg02014899 | chr7 | Open Sea    | 0.673706221 | 0.87639781  | 0.2026916 | 0.013032 |
| cg22894276 | chr7 | North Shelf | 0.514369951 | 0.716876459 | 0.2025065 | 0.019511 |
| cg05947761 | chr7 | Open Sea    | 0.559502672 | 0.761899773 | 0.2023971 | 0.004341 |
| cg00832650 | chr7 | South Shore | 0.60039095  | 0.802781367 | 0.2023904 | 0.019608 |
| cg21893387 | chr7 | Open Sea    | 0.746607395 | 0.948925632 | 0.2023182 | 0.000783 |
| cg27586255 | chr7 | Open Sea    | 0.672963752 | 0.8750299   | 0.2020661 | 0.001123 |
| cg02257708 | chr7 | North Shore | 0.716408769 | 0.918353649 | 0.2019449 | 0.000119 |
| cg19802368 | chr7 | Open Sea    | 0.650491465 | 0.85236439  | 0.2018729 | 0.000488 |
| cg00771867 | chr7 | North Shore | 0.506040271 | 0.707820982 | 0.2017807 | 0.002321 |
| cg00913288 | chr7 | Open Sea    | 0.615354291 | 0.81652959  | 0.2011753 | 0.001026 |
| cg00335591 | chr7 | Open Sea    | 0.633223486 | 0.834386825 | 0.2011633 | 0.006573 |
| cg18222853 | chr7 | Open Sea    | 0.698887425 | 0.8997379   | 0.2008505 | 0.000833 |
| cg26649851 | chr7 | Open Sea    | 0.706058291 | 0.906899267 | 0.200841  | 0.0003   |
| cg08721187 | chr7 | North Shelf | 0.715441146 | 0.916258464 | 0.2008173 | 0.000898 |
| cg03012028 | chr7 | Open Sea    | 0.279086984 | 0.479681138 | 0.2005942 | 0.000548 |
| cg04336894 | chr7 | Open Sea    | 0.709985428 | 0.910472882 | 0.2004875 | 0.000974 |
| cg03221054 | chr7 | Open Sea    | 0.674199797 | 0.874566621 | 0.2003668 | 0.003195 |
| cg02638567 | chr7 | Open Sea    | 0.725700092 | 0.925846221 | 0.2001461 | 0.000428 |
| cg23298114 | chr8 | Open Sea    | 0.214911661 | 0.719115379 | 0.5042037 | 0.00264  |
| cg22638105 | chr8 | Open Sea    | 0.409314988 | 0.865399256 | 0.4560843 | 7.92E-11 |
| cg17511604 | chr8 | Open Sea    | 0.461331702 | 0.914493506 | 0.4531618 | 0.00066  |
| cg20513418 | chr8 | South Shore | 0.212894209 | 0.661331438 | 0.4484372 | 0.030853 |
| cg19515398 | chr8 | Open Sea    | 0.418185643 | 0.846989636 | 0.428804  | 1.59E-08 |
| cg27135989 | chr8 | South Shelf | 0.444108949 | 0.864263065 | 0.4201541 | 0.000164 |
| cg09631175 | chr8 | Open Sea    | 0.454230124 | 0.873856631 | 0.4196265 | 0.000129 |
| cg11205610 | chr8 | Open Sea    | 0.469145009 | 0.877426475 | 0.4082815 | 0.001314 |
| cg21755755 | chr8 | Open Sea    | 0.476965837 | 0.881376553 | 0.4044107 | 7.75E-07 |
| cg11708223 | chr8 | Open Sea    | 0.52513944  | 0.929200566 | 0.4040611 | 5.51E-07 |
| cg05778278 | chr8 | North Shore | 0.442063029 | 0.845023083 | 0.4029601 | 0.006895 |
| cg00131261 | chr8 | Open Sea    | 0.528854605 | 0.929731132 | 0.4008765 | 1.28E-07 |
| cg22645961 | chr8 | Open Sea    | 0.516494483 | 0.91325547  | 0.396761  | 2.27E-06 |
| cg17661135 | chr8 | Open Sea    | 0.342733252 | 0.733822019 | 0.3910888 | 6.26E-10 |
| cg03762802 | chr8 | North Shelf | 0.516806438 | 0.904673351 | 0.3878669 | 9.03E-09 |
| cg26016985 | chr8 | Open Sea    | 0.527091288 | 0.914703323 | 0.387612  | 1.72E-08 |
| cg01651915 | chr8 | Open Sea    | 0.135367297 | 0.521869889 | 0.3865026 | 0.015734 |
| cg11592677 | chr8 | Open Sea    | 0.469926781 | 0.850763671 | 0.3808369 | 0.000128 |
| cg11147251 | chr8 | Open Sea    | 0.539073538 | 0.918744929 | 0.3796714 | 5.01E-10 |
| cg15707869 | chr8 | North Shore | 0.513265077 | 0.892796706 | 0.3795316 | 0.001316 |
| cg10121745 | chr8 | Open Sea    | 0.43694388  | 0.815763512 | 0.3788196 | 2.62E-09 |
| cg22626985 | chr8 | Open Sea    | 0.484604719 | 0.860336232 | 0.3757315 | 1E-07    |
| cg21328389 | chr8 | Open Sea    | 0.487151589 | 0.861275157 | 0.3741236 | 0.001006 |
| cg05925503 | chr8 | Open Sea    | 0.505343597 | 0.879415158 | 0.3740716 | 0.000985 |
| cg17891505 | chr8 | Open Sea    | 0.484397137 | 0.858359734 | 0.3739626 | 0.009846 |
| cg27247689 | chr8 | North Shelf | 0.38852615  | 0.761783944 | 0.3732578 | 0.000803 |
| cg07236958 | chr8 | Open Sea    | 0.424552955 | 0.794689949 | 0.370137  | 0.004209 |
| cg25882887 | chr8 | Open Sea    | 0.495267642 | 0.863421977 | 0.3681543 | 1.73E-06 |
| cg04958191 | chr8 | South Shore | 0.423221916 | 0.789790445 | 0.3665685 | 0.02359  |

|            |      |             |             |             |           |          |
|------------|------|-------------|-------------|-------------|-----------|----------|
| cg20902975 | chr8 | North Shelf | 0.327103991 | 0.693503116 | 0.3663991 | 0.000178 |
| cg05965490 | chr8 | Open Sea    | 0.493162163 | 0.857812698 | 0.3646505 | 0.000596 |
| cg23896695 | chr8 | Open Sea    | 0.478094293 | 0.84261688  | 0.3645226 | 0.044082 |
| cg00736681 | chr8 | Open Sea    | 0.568553784 | 0.928505727 | 0.3599519 | 2.74E-06 |
| cg20321319 | chr8 | South Shore | 0.237828223 | 0.594951219 | 0.357123  | 8.37E-08 |
| cg19033555 | chr8 | Open Sea    | 0.516970383 | 0.873235218 | 0.3562648 | 0.01639  |
| cg08913523 | chr8 | Open Sea    | 0.102049938 | 0.455904789 | 0.3538549 | 0.013692 |
| cg06103412 | chr8 | North Shelf | 0.545697002 | 0.899060031 | 0.353363  | 7.03E-09 |
| cg13447080 | chr8 | Open Sea    | 0.329303304 | 0.680148174 | 0.3508449 | 1.73E-05 |
| cg17316966 | chr8 | Open Sea    | 0.446487175 | 0.795952151 | 0.349465  | 0.006052 |
| cg07178994 | chr8 | Open Sea    | 0.251067429 | 0.599157721 | 0.3480903 | 0.000544 |
| cg14001858 | chr8 | Open Sea    | 0.561023887 | 0.908679396 | 0.3476555 | 2.68E-08 |
| cg25070442 | chr8 | Open Sea    | 0.495577503 | 0.842941536 | 0.347364  | 0.00018  |
| cg00128482 | chr8 | Open Sea    | 0.386618113 | 0.733758744 | 0.3471406 | 0.002591 |
| cg10700380 | chr8 | South Shore | 0.555034097 | 0.89508968  | 0.3400556 | 1.04E-05 |
| cg23296836 | chr8 | Open Sea    | 0.523320383 | 0.863219137 | 0.3398988 | 5.83E-07 |
| cg17466952 | chr8 | Open Sea    | 0.58826248  | 0.925725837 | 0.3374634 | 2.21E-06 |
| cg24861686 | chr8 | North Shelf | 0.500306193 | 0.83514594  | 0.3348397 | 1.05E-06 |
| cg27475652 | chr8 | South Shelf | 0.448091628 | 0.781858177 | 0.3337665 | 9.23E-06 |
| cg22872064 | chr8 | Open Sea    | 0.556456008 | 0.889385183 | 0.3329292 | 1.33E-05 |
| cg07874755 | chr8 | Open Sea    | 0.439766775 | 0.770956922 | 0.3311901 | 0.022305 |
| cg23560676 | chr8 | Open Sea    | 0.553327505 | 0.884165419 | 0.3308379 | 2.19E-06 |
| cg26837853 | chr8 | Open Sea    | 0.44510781  | 0.774408315 | 0.3293005 | 2.5E-05  |
| cg01025954 | chr8 | Open Sea    | 0.402376901 | 0.730189162 | 0.3278123 | 0.023772 |
| cg11095122 | chr8 | Open Sea    | 0.543659553 | 0.870696124 | 0.3270366 | 6.53E-06 |
| cg18187729 | chr8 | Open Sea    | 0.437622011 | 0.762711183 | 0.3250892 | 5.18E-05 |
| cg18995876 | chr8 | Open Sea    | 0.580719702 | 0.905530678 | 0.324811  | 1.09E-07 |
| cg07333231 | chr8 | Island      | 0.542130084 | 0.866597967 | 0.3244679 | 0.001567 |
| cg16101118 | chr8 | South Shelf | 0.562503002 | 0.88692629  | 0.3244233 | 0.000225 |
| cg08462367 | chr8 | Open Sea    | 0.459417787 | 0.783157196 | 0.3237394 | 0.00396  |
| cg25038773 | chr8 | Open Sea    | 0.475038855 | 0.796816145 | 0.3217773 | 0.0067   |
| cg10419957 | chr8 | Open Sea    | 0.508631748 | 0.829937161 | 0.3213054 | 0.005291 |
| cg07581623 | chr8 | Open Sea    | 0.485070708 | 0.806139257 | 0.3210685 | 3.27E-06 |
| cg08123106 | chr8 | Open Sea    | 0.459562482 | 0.78000409  | 0.3204416 | 0.011179 |
| cg00929345 | chr8 | North Shore | 0.524247494 | 0.84454139  | 0.3202939 | 0.000303 |
| cg27648556 | chr8 | Open Sea    | 0.517093138 | 0.83585036  | 0.3187572 | 0.000261 |
| cg12042060 | chr8 | North Shelf | 0.495895103 | 0.812591846 | 0.3166967 | 2.06E-05 |
| cg24195359 | chr8 | Open Sea    | 0.536813551 | 0.853487563 | 0.316674  | 0.000969 |
| cg04051278 | chr8 | Open Sea    | 0.582631306 | 0.898810167 | 0.3161789 | 1.77E-06 |
| cg00887902 | chr8 | Open Sea    | 0.476335954 | 0.787225169 | 0.3108892 | 0.001936 |
| cg20981106 | chr8 | Open Sea    | 0.597351701 | 0.907793039 | 0.3104413 | 2.74E-06 |
| cg02399008 | chr8 | Open Sea    | 0.485803559 | 0.794239975 | 0.3084364 | 0.026568 |
| cg11132469 | chr8 | South Shelf | 0.502894823 | 0.810824428 | 0.3079296 | 0.003734 |
| cg12637676 | chr8 | Open Sea    | 0.567366245 | 0.87472227  | 0.307356  | 0.001415 |
| cg25494730 | chr8 | North Shore | 0.555543124 | 0.862896101 | 0.307353  | 0.005296 |
| cg10222925 | chr8 | North Shore | 0.57773343  | 0.884711239 | 0.3069778 | 4.56E-06 |
| cg15814218 | chr8 | North Shelf | 0.608393384 | 0.914908102 | 0.3065147 | 3.82E-06 |
| cg12897502 | chr8 | Open Sea    | 0.561462907 | 0.866345499 | 0.3048826 | 6.42E-08 |
| cg06809074 | chr8 | Island      | 0.448649651 | 0.753343291 | 0.3046936 | 0.045543 |
| cg23399286 | chr8 | Open Sea    | 0.429880662 | 0.734105344 | 0.3042247 | 0.009116 |

|            |      |             |             |             |           |          |
|------------|------|-------------|-------------|-------------|-----------|----------|
| cg21594383 | chr8 | Open Sea    | 0.417166681 | 0.72043794  | 0.3032713 | 6.85E-05 |
| cg12665059 | chr8 | Open Sea    | 0.5942434   | 0.89691966  | 0.3026763 | 7.47E-07 |
| cg04851639 | chr8 | Open Sea    | 0.404900208 | 0.707307324 | 0.3024071 | 0.034626 |
| cg09729387 | chr8 | Open Sea    | 0.46303159  | 0.764865709 | 0.3018341 | 0.000853 |
| cg09763347 | chr8 | Open Sea    | 0.616812352 | 0.917981863 | 0.3011695 | 1.22E-05 |
| cg15451642 | chr8 | Open Sea    | 0.608426782 | 0.909397899 | 0.3009711 | 2.33E-05 |
| cg16417043 | chr8 | Open Sea    | 0.478405086 | 0.779096841 | 0.3006918 | 0.047208 |
| cg20316883 | chr8 | Open Sea    | 0.500975576 | 0.799385662 | 0.2984101 | 0.016512 |
| cg07169637 | chr8 | Open Sea    | 0.573920948 | 0.871090688 | 0.2971697 | 0.000307 |
| cg03080147 | chr8 | North Shore | 0.539190628 | 0.836273408 | 0.2970828 | 0.038204 |
| cg07220366 | chr8 | Open Sea    | 0.531818277 | 0.826865083 | 0.2950468 | 0.000471 |
| cg05415871 | chr8 | Open Sea    | 0.537671316 | 0.83231174  | 0.2946404 | 6.12E-05 |
| cg24805985 | chr8 | South Shelf | 0.586041271 | 0.880073008 | 0.2940317 | 3.2E-05  |
| cg13456086 | chr8 | South Shore | 0.379406223 | 0.673407819 | 0.2940016 | 2.3E-05  |
| cg14968375 | chr8 | Open Sea    | 0.514313228 | 0.808133624 | 0.2938204 | 1.99E-05 |
| cg03393350 | chr8 | Open Sea    | 0.59724852  | 0.890859891 | 0.2936114 | 0.002484 |
| cg20543645 | chr8 | Open Sea    | 0.525488643 | 0.819054663 | 0.293566  | 0.011171 |
| cg18117048 | chr8 | Open Sea    | 0.382402337 | 0.675670582 | 0.2932682 | 1.72E-05 |
| cg08870893 | chr8 | North Shore | 0.541475917 | 0.834505209 | 0.2930293 | 1.07E-05 |
| cg25188238 | chr8 | Open Sea    | 0.574633504 | 0.867533329 | 0.2928998 | 0.002843 |
| cg10765397 | chr8 | Open Sea    | 0.542765401 | 0.834744563 | 0.2919792 | 0.003372 |
| cg19571015 | chr8 | Open Sea    | 0.583303709 | 0.874797697 | 0.291494  | 5.02E-06 |
| cg22386073 | chr8 | Open Sea    | 0.474678128 | 0.766123996 | 0.2914459 | 0.027129 |
| cg00573887 | chr8 | Open Sea    | 0.522753113 | 0.814104292 | 0.2913512 | 0.012535 |
| cg25014026 | chr8 | Open Sea    | 0.321551365 | 0.612852863 | 0.2913015 | 0.043739 |
| cg00045118 | chr8 | Open Sea    | 0.60622067  | 0.897424681 | 0.291204  | 0.018057 |
| cg10761351 | chr8 | Open Sea    | 0.509938897 | 0.80062038  | 0.2906815 | 0.028895 |
| cg11043092 | chr8 | Open Sea    | 0.619279133 | 0.909704441 | 0.2904253 | 6.29E-05 |
| cg17057086 | chr8 | Open Sea    | 0.548940956 | 0.839088054 | 0.2901471 | 0.001215 |
| cg14743346 | chr8 | North Shelf | 0.553883627 | 0.843616304 | 0.2897327 | 0.000828 |
| cg02711724 | chr8 | Open Sea    | 0.590384672 | 0.879513052 | 0.2891284 | 1.45E-06 |
| cg26064870 | chr8 | Open Sea    | 0.608231499 | 0.89728033  | 0.2890488 | 0.000131 |
| cg17939444 | chr8 | Open Sea    | 0.497383532 | 0.786409616 | 0.2890261 | 0.006921 |
| cg12832282 | chr8 | Open Sea    | 0.57917495  | 0.867572563 | 0.2883976 | 0.013113 |
| cg13252206 | chr8 | Open Sea    | 0.543788055 | 0.830834249 | 0.2870462 | 0.034163 |
| cg09963024 | chr8 | North Shore | 0.601625936 | 0.888600081 | 0.2869741 | 8.13E-05 |
| cg20227326 | chr8 | Open Sea    | 0.640197149 | 0.927156724 | 0.2869596 | 1.56E-05 |
| cg22660904 | chr8 | Open Sea    | 0.409576004 | 0.696303593 | 0.2867276 | 0.001967 |
| cg25261151 | chr8 | South Shore | 0.234500791 | 0.520758171 | 0.2862574 | 0.012061 |
| cg08792272 | chr8 | Open Sea    | 0.414450556 | 0.700562128 | 0.2861116 | 0.018916 |
| cg13176454 | chr8 | Open Sea    | 0.616294661 | 0.901930213 | 0.2856356 | 1.63E-05 |
| cg08701816 | chr8 | South Shelf | 0.577379648 | 0.861992304 | 0.2846127 | 0.002014 |
| cg23913941 | chr8 | Open Sea    | 0.550784206 | 0.835057048 | 0.2842728 | 0.001569 |
| cg14479709 | chr8 | South Shelf | 0.456683801 | 0.740621163 | 0.2839374 | 1.5E-05  |
| cg20309975 | chr8 | Island      | 0.5514821   | 0.835320182 | 0.2838381 | 0.00011  |
| cg19589396 | chr8 | Open Sea    | 0.366517844 | 0.650069961 | 0.2835521 | 0.00237  |
| cg19662554 | chr8 | North Shore | 0.501391005 | 0.784701909 | 0.2833109 | 8.26E-05 |
| cg13320538 | chr8 | South Shore | 0.573908279 | 0.856268572 | 0.2823603 | 4.33E-05 |
| cg25766801 | chr8 | Open Sea    | 0.631114058 | 0.912176142 | 0.2810621 | 6.87E-06 |
| cg12255501 | chr8 | South Shelf | 0.587178938 | 0.86764587  | 0.2804669 | 0.001316 |



|            |      |             |             |             |           |          |
|------------|------|-------------|-------------|-------------|-----------|----------|
| cg18536819 | chr8 | Open Sea    | 0.636097068 | 0.916387125 | 0.2802901 | 1.02E-05 |
| cg17082405 | chr8 | Open Sea    | 0.557431785 | 0.837296793 | 0.279865  | 0.001031 |
| cg07506407 | chr8 | Open Sea    | 0.544076942 | 0.823648469 | 0.2795715 | 0.009994 |
| cg20543651 | chr8 | Open Sea    | 0.347983978 | 0.626325171 | 0.2783412 | 1.93E-05 |
| cg27269149 | chr8 | North Shore | 0.537653157 | 0.81551814  | 0.277865  | 0.008661 |
| cg23426156 | chr8 | Open Sea    | 0.544435005 | 0.821622914 | 0.2771879 | 1.58E-05 |
| cg21757189 | chr8 | Open Sea    | 0.644736414 | 0.920664114 | 0.2759277 | 2.26E-05 |
| cg26049390 | chr8 | Open Sea    | 0.55326046  | 0.828308505 | 0.275048  | 0.004078 |
| cg01231009 | chr8 | Open Sea    | 0.581667653 | 0.855671847 | 0.2740042 | 1.17E-05 |
| cg03028061 | chr8 | South Shore | 0.334363936 | 0.608338532 | 0.2739746 | 0.000701 |
| cg13457549 | chr8 | Island      | 0.561633602 | 0.83552716  | 0.2738936 | 0.00643  |
| cg25876227 | chr8 | Open Sea    | 0.610481279 | 0.884039641 | 0.2735584 | 3.69E-05 |
| cg01643997 | chr8 | Open Sea    | 0.657543894 | 0.930876519 | 0.2733326 | 3.97E-05 |
| cg17015994 | chr8 | Open Sea    | 0.43750657  | 0.710664831 | 0.2731583 | 8.29E-06 |
| cg00923934 | chr8 | Open Sea    | 0.446810571 | 0.719890027 | 0.2730795 | 0.029926 |
| cg08587313 | chr8 | Open Sea    | 0.597541922 | 0.870431151 | 0.2728892 | 0.000128 |
| cg03534326 | chr8 | Open Sea    | 0.486643495 | 0.759217222 | 0.2725737 | 1.76E-07 |
| cg26228558 | chr8 | Open Sea    | 0.531353369 | 0.803910073 | 0.2725567 | 0.021838 |
| cg11997853 | chr8 | South Shore | 0.591012456 | 0.863447216 | 0.2724348 | 3.83E-07 |
| cg03274800 | chr8 | Open Sea    | 0.632789417 | 0.905024641 | 0.2722352 | 3.61E-05 |
| cg00406489 | chr8 | Open Sea    | 0.590122451 | 0.861714375 | 0.2715919 | 0.000416 |
| cg04478080 | chr8 | Open Sea    | 0.424654004 | 0.696138471 | 0.2714845 | 1.86E-05 |
| cg22688072 | chr8 | South Shelf | 0.588586392 | 0.859622047 | 0.2710357 | 3.99E-05 |
| cg20265951 | chr8 | Open Sea    | 0.64044942  | 0.910639383 | 0.27019   | 1.62E-05 |
| cg12284098 | chr8 | Open Sea    | 0.572345488 | 0.842387516 | 0.270042  | 0.04135  |
| cg12865818 | chr8 | Open Sea    | 0.622848106 | 0.892471368 | 0.2696233 | 3.09E-05 |
| cg25624690 | chr8 | Open Sea    | 0.600184133 | 0.869751948 | 0.2695678 | 2.3E-05  |
| cg16865396 | chr8 | Open Sea    | 0.495932947 | 0.764512225 | 0.2685793 | 0.001776 |
| cg03955375 | chr8 | Open Sea    | 0.635562072 | 0.903834845 | 0.2682728 | 0.000178 |
| cg17718074 | chr8 | North Shore | 0.650401049 | 0.918521305 | 0.2681203 | 4.38E-05 |
| cg24833737 | chr8 | South Shore | 0.597810819 | 0.865271388 | 0.2674606 | 0.000317 |
| cg22866754 | chr8 | North Shore | 0.618625775 | 0.885961612 | 0.2673358 | 3.3E-05  |
| cg24637974 | chr8 | South Shelf | 0.666353283 | 0.933177989 | 0.2668247 | 0.000146 |
| cg05746500 | chr8 | Open Sea    | 0.625640092 | 0.891590825 | 0.2659507 | 0.000247 |
| cg23963995 | chr8 | Open Sea    | 0.659724194 | 0.925609806 | 0.2658856 | 8.4E-05  |
| cg09692368 | chr8 | North Shore | 0.606346228 | 0.872231264 | 0.265885  | 0.000207 |
| cg06053347 | chr8 | North Shelf | 0.592057025 | 0.85740582  | 0.2653488 | 0.003762 |
| cg02675173 | chr8 | Open Sea    | 0.494910222 | 0.75986009  | 0.2649499 | 0.027743 |
| cg03964343 | chr8 | Open Sea    | 0.645390918 | 0.910026668 | 0.2646358 | 6.57E-05 |
| cg23755884 | chr8 | Open Sea    | 0.539845978 | 0.804086779 | 0.2642408 | 2.73E-05 |
| cg04028606 | chr8 | North Shelf | 0.628707482 | 0.89288487  | 0.2641774 | 0.000109 |
| cg00022900 | chr8 | Open Sea    | 0.522356969 | 0.786475055 | 0.2641181 | 0.000603 |
| cg00564524 | chr8 | North Shore | 0.620025292 | 0.88396387  | 0.2639386 | 4.36E-05 |
| cg17086686 | chr8 | North Shelf | 0.653327135 | 0.916236697 | 0.2629096 | 3.03E-05 |
| cg12484411 | chr8 | Open Sea    | 0.63788001  | 0.90072588  | 0.2628459 | 0.000175 |
| cg11830605 | chr8 | Open Sea    | 0.512490194 | 0.774640159 | 0.26215   | 0.045306 |
| cg21293455 | chr8 | Open Sea    | 0.635969133 | 0.897453061 | 0.2614839 | 0.00122  |
| cg22917314 | chr8 | North Shore | 0.593819225 | 0.855103006 | 0.2612838 | 0.019947 |
| cg09857273 | chr8 | Open Sea    | 0.571392149 | 0.832230478 | 0.2608383 | 9.54E-05 |
| cg04224786 | chr8 | Open Sea    | 0.349549098 | 0.609943649 | 0.2603946 | 4.15E-05 |

|            |      |             |             |             |           |          |
|------------|------|-------------|-------------|-------------|-----------|----------|
| cg26898869 | chr8 | South Shelf | 0.551202835 | 0.810104691 | 0.2589019 | 7.41E-06 |
| cg05580991 | chr8 | Open Sea    | 0.508389716 | 0.766724387 | 0.2583347 | 0.003046 |
| cg11324259 | chr8 | Open Sea    | 0.509509533 | 0.767615855 | 0.2581063 | 2.04E-05 |
| cg23360101 | chr8 | Open Sea    | 0.444664878 | 0.702707783 | 0.2580429 | 0.030227 |
| cg23559636 | chr8 | North Shelf | 0.644908853 | 0.902767089 | 0.2578582 | 7.86E-06 |
| cg08885179 | chr8 | Open Sea    | 0.591654832 | 0.84782558  | 0.2561707 | 0.002165 |
| cg13077865 | chr8 | Open Sea    | 0.413478186 | 0.669499728 | 0.2560215 | 0.004274 |
| cg12621745 | chr8 | North Shelf | 0.575696517 | 0.831290445 | 0.2555939 | 0.004019 |
| cg00008695 | chr8 | North Shore | 0.606482088 | 0.861285065 | 0.254803  | 0.004704 |
| cg10869265 | chr8 | Open Sea    | 0.673779805 | 0.928573231 | 0.2547934 | 0.000172 |
| cg00202568 | chr8 | Open Sea    | 0.553069217 | 0.807853719 | 0.2547845 | 0.018746 |
| cg14907066 | chr8 | North Shore | 0.655279301 | 0.90951374  | 0.2542344 | 0.000214 |
| cg00996588 | chr8 | North Shore | 0.581714015 | 0.835945339 | 0.2542313 | 0.000177 |
| cg11122451 | chr8 | Open Sea    | 0.666848964 | 0.921000233 | 0.2541513 | 0.000118 |
| cg07703654 | chr8 | South Shore | 0.45349993  | 0.706925292 | 0.2534254 | 0.038917 |
| cg23043779 | chr8 | Open Sea    | 0.647906916 | 0.901237101 | 0.2533302 | 6.13E-05 |
| cg27029018 | chr8 | Open Sea    | 0.662193516 | 0.915263988 | 0.2530705 | 0.000588 |
| cg14700531 | chr8 | North Shelf | 0.468009486 | 0.720172369 | 0.2521629 | 0.000632 |
| cg26572865 | chr8 | Open Sea    | 0.626304797 | 0.878045781 | 0.251741  | 2.34E-05 |
| cg00911881 | chr8 | North Shore | 0.443872252 | 0.695200321 | 0.2513281 | 0.023849 |
| cg14993167 | chr8 | Open Sea    | 0.672436499 | 0.923722423 | 0.2512859 | 8.04E-05 |
| cg24050775 | chr8 | Open Sea    | 0.528174596 | 0.779364338 | 0.2511897 | 2.3E-06  |
| cg03760919 | chr8 | Open Sea    | 0.628645993 | 0.879673268 | 0.2510273 | 0.000107 |
| cg05366058 | chr8 | North Shore | 0.463207584 | 0.713253291 | 0.2500457 | 0.043862 |
| cg21904719 | chr8 | Open Sea    | 0.569617457 | 0.819463575 | 0.2498461 | 0.000266 |
| cg03925970 | chr8 | Open Sea    | 0.585812971 | 0.835619411 | 0.2498064 | 0.000416 |
| cg26321840 | chr8 | Open Sea    | 0.631637913 | 0.880888702 | 0.2492508 | 0.01535  |
| cg02563011 | chr8 | Open Sea    | 0.535979011 | 0.784235037 | 0.248256  | 0.016126 |
| cg18629583 | chr8 | North Shelf | 0.599481302 | 0.847671105 | 0.2481898 | 0.008603 |
| cg18533313 | chr8 | South Shore | 0.634333073 | 0.882313997 | 0.2479809 | 0.000199 |
| cg25368103 | chr8 | Open Sea    | 0.583473554 | 0.830818396 | 0.2473448 | 0.006935 |
| cg06957003 | chr8 | North Shelf | 0.459957707 | 0.707116538 | 0.2471588 | 2.95E-05 |
| cg12243864 | chr8 | North Shelf | 0.664459096 | 0.910693843 | 0.2462347 | 0.001465 |
| cg27523780 | chr8 | South Shore | 0.562467274 | 0.808621174 | 0.2461539 | 0.000595 |
| cg02083214 | chr8 | Open Sea    | 0.593931653 | 0.840057291 | 0.2461256 | 0.002676 |
| cg27649037 | chr8 | Open Sea    | 0.642544684 | 0.888601124 | 0.2460564 | 0.000493 |
| cg24142603 | chr8 | Island      | 0.495294306 | 0.741201    | 0.2459067 | 9.36E-05 |
| cg12636543 | chr8 | Open Sea    | 0.383997408 | 0.62921993  | 0.2452225 | 0.000275 |
| cg10191240 | chr8 | Open Sea    | 0.10907769  | 0.35345967  | 0.244382  | 0.001078 |
| cg22523679 | chr8 | Open Sea    | 0.535750307 | 0.778636188 | 0.2428859 | 0.000183 |
| cg19085352 | chr8 | South Shelf | 0.462292109 | 0.704922586 | 0.2426305 | 0.01051  |
| cg21460403 | chr8 | Open Sea    | 0.63742435  | 0.880028401 | 0.2426041 | 0.003615 |
| cg18585246 | chr8 | Open Sea    | 0.667256564 | 0.909497032 | 0.2422405 | 1.95E-05 |
| cg27259731 | chr8 | South Shelf | 0.675874178 | 0.917589464 | 0.2417153 | 0.000193 |
| cg10603136 | chr8 | Open Sea    | 0.674009324 | 0.91563717  | 0.2416278 | 1.35E-05 |
| cg02681842 | chr8 | Open Sea    | 0.503776064 | 0.745366457 | 0.2415904 | 0.000189 |
| cg23353046 | chr8 | South Shelf | 0.66338301  | 0.904682358 | 0.2412993 | 0.000262 |
| cg05369766 | chr8 | Open Sea    | 0.628128929 | 0.86928245  | 0.2411535 | 0.004541 |
| cg16442852 | chr8 | South Shelf | 0.667470399 | 0.908563896 | 0.2410935 | 0.003157 |
| cg24512303 | chr8 | Open Sea    | 0.598784442 | 0.839367655 | 0.2405832 | 0.047694 |

|            |      |             |             |             |           |          |
|------------|------|-------------|-------------|-------------|-----------|----------|
| cg27596649 | chr8 | Open Sea    | 0.615241592 | 0.85559186  | 0.2403503 | 8.21E-05 |
| cg19841740 | chr8 | Open Sea    | 0.645098794 | 0.885187739 | 0.2400889 | 0.000165 |
| cg11351709 | chr8 | North Shelf | 0.469417682 | 0.708764564 | 0.2393469 | 0.00145  |
| cg12868707 | chr8 | North Shore | 0.539053405 | 0.778149948 | 0.2390965 | 0.002742 |
| cg22272100 | chr8 | Open Sea    | 0.632255998 | 0.870078057 | 0.2378221 | 5.97E-05 |
| cg13687509 | chr8 | Open Sea    | 0.626136019 | 0.863549284 | 0.2374133 | 0.000921 |
| cg11363234 | chr8 | North Shelf | 0.593004109 | 0.829472541 | 0.2364684 | 0.0404   |
| cg07292140 | chr8 | Open Sea    | 0.664367491 | 0.899679846 | 0.2353124 | 0.009393 |
| cg20367258 | chr8 | North Shore | 0.499830483 | 0.734046063 | 0.2342156 | 0.009307 |
| cg14925067 | chr8 | South Shore | 0.61217018  | 0.846330585 | 0.2341604 | 8.97E-05 |
| cg18501230 | chr8 | North Shelf | 0.441625098 | 0.675717931 | 0.2340928 | 0.002695 |
| cg11118690 | chr8 | Open Sea    | 0.510463833 | 0.743497403 | 0.2330336 | 0.010273 |
| cg21959619 | chr8 | North Shore | 0.328380524 | 0.561231046 | 0.2328505 | 0.03257  |
| cg08205099 | chr8 | Open Sea    | 0.678542807 | 0.91058067  | 0.2320379 | 0.001355 |
| cg23343066 | chr8 | Open Sea    | 0.535098913 | 0.766810315 | 0.2317114 | 0.000727 |
| cg00288736 | chr8 | South Shelf | 0.614510815 | 0.845702663 | 0.2311918 | 0.000519 |
| cg12718579 | chr8 | Open Sea    | 0.56734303  | 0.79851105  | 0.231168  | 0.005826 |
| cg27617058 | chr8 | Open Sea    | 0.656002873 | 0.887067328 | 0.2310645 | 0.001815 |
| cg14257773 | chr8 | Open Sea    | 0.695353014 | 0.925949103 | 0.2305961 | 0.000167 |
| cg20559158 | chr8 | Open Sea    | 0.714148175 | 0.944481709 | 0.2303335 | 0.000449 |
| cg26366616 | chr8 | South Shelf | 0.502287923 | 0.732463481 | 0.2301756 | 0.033239 |
| cg02149509 | chr8 | Open Sea    | 0.631710464 | 0.861800577 | 0.2300901 | 0.000922 |
| cg16489468 | chr8 | Open Sea    | 0.536585108 | 0.766468341 | 0.2298832 | 0.030056 |
| cg12300018 | chr8 | Open Sea    | 0.439029846 | 0.66857448  | 0.2295446 | 0.027361 |
| cg23244463 | chr8 | Open Sea    | 0.658650441 | 0.887817556 | 0.2291671 | 0.002251 |
| cg10307904 | chr8 | Open Sea    | 0.687898935 | 0.916819982 | 0.228921  | 0.000276 |
| cg00602245 | chr8 | North Shelf | 0.624340299 | 0.853143014 | 0.2288027 | 3.7E-05  |
| cg12163365 | chr8 | Open Sea    | 0.553816925 | 0.782153923 | 0.228337  | 5.01E-05 |
| cg10327067 | chr8 | North Shelf | 0.292241577 | 0.520267999 | 0.2280264 | 0.016139 |
| cg27241889 | chr8 | South Shore | 0.335359257 | 0.563071001 | 0.2277117 | 0.036927 |
| cg07862768 | chr8 | North Shore | 0.575755796 | 0.803191391 | 0.2274356 | 0.014271 |
| cg13822256 | chr8 | North Shore | 0.459996745 | 0.687066489 | 0.2270697 | 0.02572  |
| cg20860124 | chr8 | South Shore | 0.665167903 | 0.891416847 | 0.2262489 | 0.00035  |
| cg20188739 | chr8 | North Shelf | 0.296139632 | 0.522327318 | 0.2261877 | 0.029271 |
| cg07954324 | chr8 | Open Sea    | 0.32674128  | 0.552919758 | 0.2261785 | 0.011215 |
| cg11265488 | chr8 | Open Sea    | 0.560504407 | 0.786054584 | 0.2255502 | 0.049873 |
| cg26953954 | chr8 | Open Sea    | 0.538153803 | 0.763211893 | 0.2250581 | 0.027226 |
| cg16371838 | chr8 | South Shelf | 0.586073041 | 0.81098471  | 0.2249117 | 0.000173 |
| cg23918610 | chr8 | Open Sea    | 0.706475753 | 0.931360937 | 0.2248852 | 7.14E-05 |
| cg05847038 | chr8 | Open Sea    | 0.626646241 | 0.851241035 | 0.2245948 | 0.002563 |
| cg13290785 | chr8 | South Shore | 0.668407656 | 0.892984597 | 0.2245769 | 0.004303 |
| cg14315805 | chr8 | South Shore | 0.616872121 | 0.841268647 | 0.2243965 | 0.001796 |
| cg09729274 | chr8 | Open Sea    | 0.477019519 | 0.701408011 | 0.2243885 | 0.000226 |
| cg09433131 | chr8 | Open Sea    | 0.687342151 | 0.91109189  | 0.2237497 | 0.000252 |
| cg17450190 | chr8 | Open Sea    | 0.64686708  | 0.870427213 | 0.2235601 | 0.001643 |
| cg02932321 | chr8 | Open Sea    | 0.279771258 | 0.502926669 | 0.2231554 | 0.000284 |
| cg09019592 | chr8 | South Shelf | 0.536042926 | 0.759003484 | 0.2229606 | 0.003268 |
| cg11823736 | chr8 | Open Sea    | 0.480802543 | 0.703572099 | 0.2227696 | 0.000739 |
| cg23322851 | chr8 | Open Sea    | 0.614092632 | 0.836467973 | 0.2223753 | 0.000562 |
| cg25597843 | chr8 | North Shelf | 0.6572052   | 0.879506092 | 0.2223009 | 0.00034  |

|            |      |             |             |             |           |          |
|------------|------|-------------|-------------|-------------|-----------|----------|
| cg07969668 | chr8 | Island      | 0.610610451 | 0.832369133 | 0.2217587 | 0.001951 |
| cg00314368 | chr8 | Open Sea    | 0.652524463 | 0.873646427 | 0.221122  | 0.001671 |
| cg22388347 | chr8 | Open Sea    | 0.588836622 | 0.809056965 | 0.2202203 | 0.000323 |
| cg18510311 | chr8 | Open Sea    | 0.624100476 | 0.843819406 | 0.2197189 | 0.000708 |
| cg15847600 | chr8 | Open Sea    | 0.561896574 | 0.781266491 | 0.2193699 | 0.029183 |
| cg25877069 | chr8 | Open Sea    | 0.493744704 | 0.713010495 | 0.2192658 | 0.002672 |
| cg21670708 | chr8 | North Shelf | 0.580425438 | 0.799509884 | 0.2190844 | 0.000236 |
| cg06182099 | chr8 | North Shore | 0.658927802 | 0.876865751 | 0.2179379 | 0.000243 |
| cg01607444 | chr8 | Open Sea    | 0.522559253 | 0.740244046 | 0.2176848 | 0.000674 |
| cg07744289 | chr8 | Open Sea    | 0.699545732 | 0.91608568  | 0.2165399 | 0.00056  |
| cg11385042 | chr8 | Open Sea    | 0.692797161 | 0.90881685  | 0.2160197 | 0.000722 |
| cg12743031 | chr8 | Open Sea    | 0.369201502 | 0.585032495 | 0.215831  | 0.010423 |
| cg13164141 | chr8 | Open Sea    | 0.620838992 | 0.836601834 | 0.2157628 | 0.00366  |
| cg23248351 | chr8 | Open Sea    | 0.673431624 | 0.889163394 | 0.2157318 | 0.003697 |
| cg04137490 | chr8 | Open Sea    | 0.618293746 | 0.833764485 | 0.2154707 | 0.0031   |
| cg09145147 | chr8 | Open Sea    | 0.699688499 | 0.913245932 | 0.2135574 | 0.000494 |
| cg11462459 | chr8 | Open Sea    | 0.689775782 | 0.903273422 | 0.2134976 | 0.000215 |
| cg19925215 | chr8 | Open Sea    | 0.493923626 | 0.706733459 | 0.2128098 | 0.001007 |
| cg18013056 | chr8 | Open Sea    | 0.557867039 | 0.769972968 | 0.2121059 | 0.001491 |
| cg04927725 | chr8 | South Shore | 0.374176151 | 0.585430455 | 0.2112543 | 0.007199 |
| cg20593774 | chr8 | North Shore | 0.642490812 | 0.853510132 | 0.2110193 | 0.000504 |
| cg13406339 | chr8 | Open Sea    | 0.354795163 | 0.565481755 | 0.2106866 | 2.48E-05 |
| cg04174124 | chr8 | North Shore | 0.285810902 | 0.495922577 | 0.2101117 | 3.7E-05  |
| cg07557612 | chr8 | Open Sea    | 0.55623383  | 0.766141929 | 0.2099081 | 0.006825 |
| cg10136240 | chr8 | South Shore | 0.677447887 | 0.887129358 | 0.2096815 | 0.036293 |
| cg07739188 | chr8 | Open Sea    | 0.659220022 | 0.86858663  | 0.2093666 | 0.007184 |
| cg03691530 | chr8 | Open Sea    | 0.628961973 | 0.837990401 | 0.2090284 | 0.033329 |
| cg02980055 | chr8 | North Shore | 0.55745358  | 0.765864617 | 0.208411  | 0.004042 |
| cg00935717 | chr8 | Open Sea    | 0.399657125 | 0.60792191  | 0.2082648 | 0.047098 |
| cg17212019 | chr8 | Open Sea    | 0.32063365  | 0.528427917 | 0.2077943 | 0.000404 |
| cg10145533 | chr8 | Open Sea    | 0.679874592 | 0.887640301 | 0.2077657 | 0.005778 |
| cg23321038 | chr8 | Open Sea    | 0.656215178 | 0.86394881  | 0.2077336 | 0.003537 |
| cg06287665 | chr8 | Open Sea    | 0.697413482 | 0.904908905 | 0.2074954 | 0.000107 |
| cg26793019 | chr8 | Open Sea    | 0.658848846 | 0.866192051 | 0.2073432 | 0.002096 |
| cg07572435 | chr8 | Open Sea    | 0.649831594 | 0.857146571 | 0.207315  | 0.029845 |
| cg16424196 | chr8 | Open Sea    | 0.551094404 | 0.757914618 | 0.2068202 | 0.004886 |
| cg22526491 | chr8 | North Shelf | 0.632041645 | 0.83807101  | 0.2060294 | 0.042053 |
| cg07028950 | chr8 | Open Sea    | 0.552202838 | 0.758196619 | 0.2059938 | 0.002108 |
| cg09529783 | chr8 | South Shore | 0.69513866  | 0.901045706 | 0.205907  | 0.002618 |
| cg00667680 | chr8 | Open Sea    | 0.687577419 | 0.893218377 | 0.205641  | 0.038859 |
| cg20100987 | chr8 | Open Sea    | 0.451201555 | 0.656724891 | 0.2055233 | 0.000244 |
| cg08225389 | chr8 | Open Sea    | 0.717078807 | 0.922561475 | 0.2054827 | 0.000842 |
| cg21053362 | chr8 | Open Sea    | 0.489269447 | 0.694564732 | 0.2052953 | 0.003864 |
| cg15654892 | chr8 | Open Sea    | 0.469434242 | 0.674457934 | 0.2050237 | 0.001664 |
| cg20433580 | chr8 | Open Sea    | 0.659790232 | 0.864647107 | 0.2048569 | 0.000437 |
| cg14639904 | chr8 | North Shelf | 0.617463582 | 0.822281936 | 0.2048184 | 0.033659 |
| cg13611636 | chr8 | North Shore | 0.615704099 | 0.82024752  | 0.2045434 | 0.002033 |
| cg08171336 | chr8 | South Shore | 0.704084853 | 0.908280365 | 0.2041955 | 0.003731 |
| cg04440283 | chr8 | Open Sea    | 0.439579106 | 0.643130533 | 0.2035514 | 0.011113 |
| cg04104966 | chr8 | North Shelf | 0.667996101 | 0.871414389 | 0.2034183 | 0.002615 |

|            |      |             |             |             |           |          |
|------------|------|-------------|-------------|-------------|-----------|----------|
| cg18327276 | chr8 | Open Sea    | 0.594196576 | 0.797443629 | 0.2032471 | 0.048167 |
| cg18719217 | chr8 | Island      | 0.690222705 | 0.893418424 | 0.2031957 | 0.000341 |
| cg17164016 | chr8 | South Shelf | 0.458897236 | 0.662067202 | 0.20317   | 0.008604 |
| cg16151924 | chr8 | Open Sea    | 0.64584607  | 0.848731089 | 0.202885  | 0.017908 |
| cg00374101 | chr8 | Open Sea    | 0.66387116  | 0.866620649 | 0.2027495 | 2.6E-05  |
| cg21844893 | chr8 | Open Sea    | 0.701406513 | 0.903896918 | 0.2024904 | 0.002189 |
| cg20814718 | chr8 | North Shore | 0.508417585 | 0.710727904 | 0.2023103 | 0.019404 |
| cg13708803 | chr8 | Open Sea    | 0.271800532 | 0.473766342 | 0.2019658 | 0.000148 |
| cg05427488 | chr8 | Open Sea    | 0.665988489 | 0.867581332 | 0.2015928 | 0.003671 |
| cg18196087 | chr8 | South Shore | 0.693624755 | 0.895099498 | 0.2014747 | 0.000663 |
| cg21880079 | chr8 | Open Sea    | 0.709745717 | 0.911194246 | 0.2014485 | 0.000175 |
| cg23212642 | chr8 | Open Sea    | 0.685355903 | 0.886690076 | 0.2013342 | 0.030675 |
| cg27376872 | chr8 | Open Sea    | 0.377189674 | 0.578366902 | 0.2011772 | 0.023026 |
| cg12974832 | chr8 | Open Sea    | 0.733343543 | 0.934167264 | 0.2008237 | 0.000766 |
| cg19866594 | chr8 | Open Sea    | 0.711473625 | 0.912131144 | 0.2006575 | 0.000575 |
| cg17966488 | chr8 | Open Sea    | 0.674132137 | 0.874707545 | 0.2005754 | 0.00133  |
| cg04852776 | chr8 | Open Sea    | 0.713658232 | 0.913813477 | 0.2001552 | 0.002938 |
| cg08008088 | chr8 | Island      | 0.635373858 | 0.83542991  | 0.2000561 | 0.00199  |
| cg18217048 | chr8 | Open Sea    | 0.41432231  | 0.614362653 | 0.2000403 | 0.000649 |
| cg13698816 | chr9 | Open Sea    | 0.517569664 | 0.899827368 | 0.3822577 | 1.66E-08 |
| cg13817518 | chr9 | Open Sea    | 0.477764569 | 0.850312361 | 0.3725478 | 0.030152 |
| cg13591204 | chr9 | North Shelf | 0.468765555 | 0.826470367 | 0.3577048 | 3.22E-06 |
| cg07962315 | chr9 | South Shore | 0.176903481 | 0.519944004 | 0.3430405 | 0.032755 |
| cg21248989 | chr9 | North Shelf | 0.413826979 | 0.753839496 | 0.3400125 | 9.05E-06 |
| cg14557554 | chr9 | South Shore | 0.569040646 | 0.883493045 | 0.3144524 | 6.37E-06 |
| cg14294859 | chr9 | Open Sea    | 0.385959942 | 0.697791165 | 0.3118312 | 0.017632 |
| cg14443041 | chr9 | Open Sea    | 0.616501789 | 0.925769972 | 0.3092682 | 1.04E-06 |
| cg08950105 | chr9 | North Shore | 0.565553095 | 0.874604684 | 0.3090516 | 1.27E-05 |
| cg14285881 | chr9 | South Shelf | 0.509580468 | 0.81063633  | 0.3010559 | 0.005336 |
| cg13572911 | chr9 | North Shore | 0.536726095 | 0.829148622 | 0.2924225 | 0.006775 |
| cg01743846 | chr9 | North Shore | 0.466615306 | 0.758541253 | 0.2919259 | 0.003908 |
| cg13644626 | chr9 | South Shelf | 0.519933767 | 0.806120433 | 0.2861867 | 0.002927 |
| cg14397941 | chr9 | Open Sea    | 0.582630896 | 0.864384263 | 0.2817534 | 0.000351 |
| cg14162011 | chr9 | Open Sea    | 0.561823913 | 0.839639479 | 0.2778156 | 0.000895 |
| cg21170007 | chr9 | Open Sea    | 0.541634229 | 0.818455571 | 0.2768213 | 3.72E-07 |
| cg13439595 | chr9 | Open Sea    | 0.626914622 | 0.899348485 | 0.2724339 | 0.000246 |
| cg14118473 | chr9 | South Shelf | 0.565593602 | 0.828471577 | 0.262878  | 3.11E-06 |
| cg13870199 | chr9 | Open Sea    | 0.535026909 | 0.797041795 | 0.2620149 | 0.040992 |
| cg13588599 | chr9 | North Shore | 0.400527516 | 0.660212553 | 0.259685  | 0.002872 |
| cg14246940 | chr9 | South Shore | 0.51598516  | 0.770750803 | 0.2547656 | 0.000292 |
| cg13511936 | chr9 | Open Sea    | 0.61401742  | 0.86776754  | 0.2537501 | 1.35E-05 |
| cg06960941 | chr9 | North Shore | 0.642334071 | 0.894533876 | 0.2521998 | 4.29E-06 |
| cg14162627 | chr9 | South Shore | 0.415605143 | 0.662311084 | 0.2467059 | 0.001684 |
| cg14297444 | chr9 | North Shelf | 0.432220765 | 0.677291851 | 0.2450711 | 4.7E-05  |
| cg21230400 | chr9 | South Shelf | 0.662738048 | 0.907642599 | 0.2449046 | 7.92E-06 |
| cg13988611 | chr9 | Open Sea    | 0.664617211 | 0.908827521 | 0.2442103 | 0.000683 |
| cg13840239 | chr9 | Open Sea    | 0.610547578 | 0.846782608 | 0.236235  | 0.039512 |
| cg14567374 | chr9 | South Shore | 0.536579053 | 0.772397513 | 0.2358185 | 2.33E-05 |
| cg12800915 | chr9 | North Shore | 0.588495573 | 0.824197156 | 0.2357016 | 0.038159 |
| cg02011953 | chr9 | North Shore | 0.419802844 | 0.654794749 | 0.2349919 | 0.013406 |

|            |      |             |             |             |           |          |
|------------|------|-------------|-------------|-------------|-----------|----------|
| cg14335159 | chr9 | Open Sea    | 0.492408211 | 0.727143756 | 0.2347355 | 0.009278 |
| cg13788625 | chr9 | North Shelf | 0.509224433 | 0.73761725  | 0.2283928 | 0.007338 |
| cg27443224 | chr9 | Open Sea    | 0.658704927 | 0.886543749 | 0.2278388 | 4.56E-06 |
| cg13800802 | chr9 | Open Sea    | 0.589223016 | 0.816755773 | 0.2275328 | 0.0031   |
| cg13751548 | chr9 | South Shelf | 0.62343665  | 0.849506278 | 0.2260696 | 0.01379  |
| cg14410557 | chr9 | Open Sea    | 0.435645762 | 0.661593846 | 0.2259481 | 8.72E-07 |
| cg20403073 | chr9 | Open Sea    | 0.67052351  | 0.892856922 | 0.2223334 | 8.31E-05 |
| cg26129108 | chr9 | North Shore | 0.304266868 | 0.522416173 | 0.2181493 | 0.021073 |
| cg21177940 | chr9 | South Shelf | 0.697661598 | 0.914924587 | 0.217263  | 0.000471 |
| cg13683194 | chr9 | Open Sea    | 0.674753582 | 0.891874676 | 0.2171211 | 0.000241 |
| cg13449257 | chr9 | North Shore | 0.672472855 | 0.889315517 | 0.2168427 | 0.013265 |
| cg13517605 | chr9 | North Shore | 0.704716138 | 0.921286478 | 0.2165703 | 0.001169 |
| cg13493546 | chr9 | Open Sea    | 0.681491214 | 0.89783894  | 0.2163477 | 0.000173 |
| cg14640244 | chr9 | South Shelf | 0.301802637 | 0.517578944 | 0.2157763 | 0.010794 |
| cg14532894 | chr9 | North Shore | 0.387187045 | 0.602265299 | 0.2150783 | 1.19E-05 |
| cg14086826 | chr9 | Open Sea    | 0.689966202 | 0.903358524 | 0.2133923 | 0.000324 |
| cg13931531 | chr9 | South Shelf | 0.671356225 | 0.884294505 | 0.2129383 | 0.00462  |
| cg14022794 | chr9 | South Shelf | 0.187908372 | 0.39674702  | 0.2088386 | 0.006565 |
| cg21226938 | chr9 | Open Sea    | 0.612421553 | 0.820710352 | 0.2082888 | 0.009571 |
| cg21237586 | chr9 | North Shelf | 0.61936178  | 0.822690789 | 0.203329  | 0.000277 |
