# Supplementary material
Source: PubMed Central journal article supplement (PMC4622541)
Supplement: kepi-10-03-1006497-s006.pdf [file kepi-10-03-1006497-s006.pdf]

| ID         | Chromosome | CGI.Relation | AVERAGE $\beta$ -VALUE<br>IN CHORDOMA | AVERAGE $\beta$ -VALUE<br>IN Controls | Delta<br>$\beta$ -value | FDR      |
|------------|------------|--------------|---------------------------------------|---------------------------------------|-------------------------|----------|
| cg05956608 | chr1       | Open Sea     | 0.651368032                           | 0.062765454                           | -0.588603               | 6.47E-05 |
| cg10055231 | chr1       | North Shelf  | 0.701823827                           | 0.184109691                           | -0.517714               | 0.000205 |
| cg17966560 | chr1       | North Shore  | 0.658032192                           | 0.16460658                            | -0.493426               | 0.012894 |
| cg24315421 | chr1       | North Shore  | 0.561444341                           | 0.073487976                           | -0.487956               | 2.11E-09 |
| cg22159815 | chr1       | Open Sea     | 0.725046911                           | 0.246555406                           | -0.478492               | 0.001622 |
| cg06829686 | chr1       | Island       | 0.573680038                           | 0.103047706                           | -0.470632               | 1.6E-10  |
| cg15731815 | chr1       | Island       | 0.548232246                           | 0.080103101                           | -0.468129               | 2.93E-06 |
| cg22851420 | chr1       | Island       | 0.539036884                           | 0.082290468                           | -0.456746               | 0.000201 |
| cg19250799 | chr1       | Island       | 0.503207091                           | 0.060008489                           | -0.443199               | 2.48E-06 |
| cg21937128 | chr1       | Open Sea     | 0.778169523                           | 0.336928604                           | -0.441241               | 0.00347  |
| cg13556548 | chr1       | South Shore  | 0.632234136                           | 0.1985278                             | -0.433706               | 0.022597 |
| cg20253872 | chr1       | South Shelf  | 0.664091196                           | 0.231366145                           | -0.432725               | 0.037943 |
| cg09317884 | chr1       | Island       | 0.557198472                           | 0.126973209                           | -0.430225               | 0.004297 |
| cg14181576 | chr1       | Island       | 0.506483984                           | 0.07817242                            | -0.428312               | 6.71E-10 |
| cg26363759 | chr1       | Open Sea     | 0.631029229                           | 0.204696835                           | -0.426332               | 3.76E-05 |
| cg12690996 | chr1       | North Shore  | 0.547249223                           | 0.129691429                           | -0.417558               | 0.044553 |
| cg09762021 | chr1       | Open Sea     | 0.490831642                           | 0.074660721                           | -0.416171               | 7.55E-06 |
| cg03499234 | chr1       | Island       | 0.466677007                           | 0.052556694                           | -0.41412                | 6.73E-07 |
| cg18188739 | chr1       | Open Sea     | 0.476770466                           | 0.068151258                           | -0.408619               | 1.99E-08 |
| cg00036347 | chr1       | North Shore  | 0.488847528                           | 0.080619024                           | -0.408229               | 4.73E-07 |
| cg10061129 | chr1       | Open Sea     | 0.61943762                            | 0.212802431                           | -0.406635               | 3.43E-09 |
| cg16318112 | chr1       | Island       | 0.472634388                           | 0.068446018                           | -0.404188               | 4.86E-08 |
| cg13448978 | chr1       | Island       | 0.567771446                           | 0.163699437                           | -0.404072               | 1.1E-07  |
| cg13472192 | chr1       | Island       | 0.481733034                           | 0.078260857                           | -0.403472               | 0.000269 |
| cg16922167 | chr1       | Island       | 0.756561173                           | 0.356372197                           | -0.400189               | 0.038486 |
| cg00085493 | chr1       | North Shore  | 0.532136112                           | 0.132735263                           | -0.399401               | 0.005087 |
| cg13727629 | chr1       | Island       | 0.436180047                           | 0.038845783                           | -0.397334               | 3.9E-10  |
| cg00030047 | chr1       | North Shore  | 0.609681645                           | 0.213499359                           | -0.396182               | 0.017322 |
| cg01373911 | chr1       | Island       | 0.435528808                           | 0.039402346                           | -0.396126               | 1.48E-08 |
| cg26011615 | chr1       | Open Sea     | 0.691425936                           | 0.296175799                           | -0.39525                | 0.010134 |
| cg16315417 | chr1       | Open Sea     | 0.458855537                           | 0.063772636                           | -0.395083               | 3.18E-07 |
| cg18398753 | chr1       | Open Sea     | 0.569389385                           | 0.175982838                           | -0.393407               | 0.041322 |
| cg17031727 | chr1       | North Shore  | 0.453944596                           | 0.061244432                           | -0.3927                 | 1.48E-08 |
| cg13240017 | chr1       | North Shore  | 0.467368356                           | 0.075370214                           | -0.391998               | 2.05E-07 |
| cg02396224 | chr1       | Island       | 0.525070687                           | 0.134050212                           | -0.39102                | 2.56E-07 |
| cg06851000 | chr1       | South Shore  | 0.543594129                           | 0.15939915                            | -0.384195               | 0.002473 |
| cg18235937 | chr1       | Island       | 0.46703166                            | 0.085682931                           | -0.381349               | 4E-05    |
| cg16140253 | chr1       | South Shelf  | 0.59991419                            | 0.220631983                           | -0.379282               | 6.99E-06 |
| cg05387269 | chr1       | North Shelf  | 0.49228366                            | 0.113833299                           | -0.37845                | 3.41E-05 |
| cg09370867 | chr1       | Island       | 0.577308974                           | 0.198924835                           | -0.378384               | 2.57E-09 |
| cg13086983 | chr1       | Open Sea     | 0.49180076                            | 0.118856481                           | -0.372944               | 0.000113 |
| cg12628061 | chr1       | Open Sea     | 0.479813938                           | 0.111081732                           | -0.368732               | 1.05E-06 |
| cg11710659 | chr1       | Open Sea     | 0.511813362                           | 0.144986649                           | -0.366827               | 0.006639 |
| cg21405929 | chr1       | North Shore  | 0.884863543                           | 0.518349964                           | -0.366514               | 0.021184 |
| cg14164839 | chr1       | North Shelf  | 0.708249907                           | 0.345319691                           | -0.36293                | 0.020085 |
| cg10572465 | chr1       | Open Sea     | 0.507079427                           | 0.145861595                           | -0.361218               | 0.000689 |
| cg15840462 | chr1       | Island       | 0.44186271                            | 0.08251933                            | -0.359343               | 6.01E-09 |
| cg16394290 | chr1       | Island       | 0.431159378                           | 0.073749783                           | -0.35741                | 3.32E-05 |

|            |      |             |             |             |           |          |
|------------|------|-------------|-------------|-------------|-----------|----------|
| cg06952660 | chr1 | North Shore | 0.446320726 | 0.090401324 | -0.355919 | 4.91E-06 |
| cg09248054 | chr1 | Island      | 0.429952051 | 0.074613389 | -0.355339 | 4.72E-07 |
| cg07830160 | chr1 | Open Sea    | 0.471149394 | 0.116277226 | -0.354872 | 4.11E-05 |
| cg25203980 | chr1 | North Shelf | 0.911191197 | 0.558972967 | -0.352218 | 0.025999 |
| cg00962755 | chr1 | South Shore | 0.677541029 | 0.325966228 | -0.351575 | 3.1E-06  |
| cg13480549 | chr1 | Open Sea    | 0.411115456 | 0.059676631 | -0.351439 | 8.73E-07 |
| cg14856606 | chr1 | Open Sea    | 0.419806071 | 0.073865081 | -0.345941 | 9.99E-08 |
| cg18947360 | chr1 | Open Sea    | 0.488677706 | 0.143805975 | -0.344872 | 0.031221 |
| cg03538430 | chr1 | Island      | 0.506776813 | 0.162452066 | -0.344325 | 1.77E-08 |
| cg13420364 | chr1 | Open Sea    | 0.429344755 | 0.087797008 | -0.341548 | 0.000168 |
| cg22339338 | chr1 | North Shelf | 0.584862152 | 0.246089346 | -0.338773 | 0.035974 |
| cg25007705 | chr1 | Open Sea    | 0.58135295  | 0.242795693 | -0.338557 | 3.32E-05 |
| cg08548089 | chr1 | South Shelf | 0.668561076 | 0.331016011 | -0.337545 | 0.042024 |
| cg03518729 | chr1 | Open Sea    | 0.462158493 | 0.125321679 | -0.336837 | 0.000651 |
| cg23217622 | chr1 | Island      | 0.397966348 | 0.062541539 | -0.335425 | 4.62E-05 |
| cg11400774 | chr1 | Island      | 0.369970025 | 0.035498244 | -0.334472 | 2.96E-05 |
| cg12526197 | chr1 | South Shore | 0.823217777 | 0.489093316 | -0.334124 | 0.012366 |
| cg11187916 | chr1 | Open Sea    | 0.393791097 | 0.061831418 | -0.33196  | 7.38E-09 |
| cg12587954 | chr1 | South Shore | 0.524024699 | 0.192070864 | -0.331954 | 0.001128 |
| cg25286333 | chr1 | Island      | 0.390499794 | 0.059280722 | -0.331219 | 3.04E-08 |
| cg07012484 | chr1 | Open Sea    | 0.475636436 | 0.145171342 | -0.330465 | 0.034769 |
| cg13502252 | chr1 | Open Sea    | 0.403641764 | 0.074003444 | -0.329638 | 1.88E-05 |
| cg08823182 | chr1 | Open Sea    | 0.666791645 | 0.340675218 | -0.326116 | 0.002621 |
| cg05001111 | chr1 | Open Sea    | 0.437654014 | 0.113831858 | -0.323822 | 0.000504 |
| cg17463745 | chr1 | South Shore | 0.453827103 | 0.133263237 | -0.320564 | 0.000251 |
| cg05630111 | chr1 | South Shore | 0.766956909 | 0.446765441 | -0.320191 | 0.028853 |
| cg09895325 | chr1 | North Shore | 0.450745308 | 0.131330021 | -0.319415 | 0.006346 |
| cg06853894 | chr1 | Open Sea    | 0.462519674 | 0.143271436 | -0.319248 | 0.026851 |
| cg18433086 | chr1 | South Shore | 0.489246239 | 0.174433518 | -0.314813 | 0.029206 |
| cg22627981 | chr1 | North Shore | 0.421068502 | 0.106344236 | -0.314724 | 0.001924 |
| cg26558485 | chr1 | Island      | 0.387823824 | 0.073246866 | -0.314577 | 5.35E-05 |
| cg00112238 | chr1 | North Shelf | 0.587230278 | 0.273459183 | -0.313771 | 0.012884 |
| cg15084543 | chr1 | Island      | 0.437517897 | 0.124088727 | -0.313429 | 0.020173 |
| cg16310095 | chr1 | Open Sea    | 0.524135449 | 0.212702766 | -0.311433 | 0.024272 |
| cg16516405 | chr1 | Open Sea    | 0.619377037 | 0.309184255 | -0.310193 | 0.036371 |
| cg22353551 | chr1 | North Shore | 0.549700338 | 0.240116948 | -0.309583 | 0.026128 |
| cg06852461 | chr1 | Open Sea    | 0.39243516  | 0.084522199 | -0.307913 | 1.7E-05  |
| cg16368763 | chr1 | Island      | 0.421337768 | 0.114584042 | -0.306754 | 2.57E-09 |
| cg16312002 | chr1 | South Shore | 0.420474275 | 0.114592081 | -0.305882 | 0.000114 |
| cg24864241 | chr1 | Open Sea    | 0.399436992 | 0.09381605  | -0.305621 | 7.26E-05 |
| cg02737619 | chr1 | Island      | 0.339936543 | 0.036480122 | -0.303456 | 1.88E-05 |
| cg20798574 | chr1 | South Shore | 0.395911285 | 0.093270409 | -0.302641 | 4.18E-05 |
| cg17043722 | chr1 | Island      | 0.381882937 | 0.079254423 | -0.302629 | 0.00016  |
| cg00157638 | chr1 | Open Sea    | 0.442842723 | 0.140238362 | -0.302604 | 0.009111 |
| cg05637536 | chr1 | Island      | 0.384726263 | 0.084015531 | -0.300711 | 4.96E-06 |
| cg09858862 | chr1 | South Shore | 0.520560443 | 0.219872753 | -0.300688 | 0.002438 |
| cg00546307 | chr1 | Open Sea    | 0.730936281 | 0.431287475 | -0.299649 | 0.029147 |
| cg12679760 | chr1 | Island      | 0.352123985 | 0.05320364  | -0.29892  | 6.07E-07 |
| cg14385738 | chr1 | Open Sea    | 0.346973021 | 0.048196452 | -0.298777 | 1.73E-06 |
| cg04717485 | chr1 | North Shelf | 0.53220863  | 0.233756916 | -0.298452 | 0.006099 |

|            |      |             |             |             |           |          |
|------------|------|-------------|-------------|-------------|-----------|----------|
| cg01516372 | chr1 | Island      | 0.479511034 | 0.18107481  | -0.298436 | 2.73E-05 |
| cg08256939 | chr1 | Island      | 0.426466913 | 0.129518512 | -0.296948 | 0.022234 |
| cg14011070 | chr1 | North Shore | 0.840842828 | 0.544423758 | -0.296419 | 3.88E-13 |
| cg15202353 | chr1 | Open Sea    | 0.868657465 | 0.575159007 | -0.293498 | 6.73E-09 |
| cg18235734 | chr1 | Island      | 0.342746601 | 0.049761189 | -0.292985 | 6.12E-05 |
| cg15199181 | chr1 | Open Sea    | 0.534716337 | 0.241762407 | -0.292954 | 0.019537 |
| cg00949753 | chr1 | North Shore | 0.458933087 | 0.167216135 | -0.291717 | 0.026774 |
| cg16823064 | chr1 | North Shelf | 0.896711297 | 0.605568965 | -0.291142 | 0.006129 |
| cg23092823 | chr1 | Island      | 0.347024801 | 0.056935726 | -0.290089 | 1.14E-05 |
| cg16532282 | chr1 | Island      | 0.414988204 | 0.125381369 | -0.289607 | 0.023977 |
| cg08539965 | chr1 | Open Sea    | 0.450642275 | 0.161096113 | -0.289546 | 0.042844 |
| cg08424184 | chr1 | South Shore | 0.385399542 | 0.097178414 | -0.288221 | 0.003493 |
| cg13234110 | chr1 | North Shore | 0.333312822 | 0.046675552 | -0.286637 | 6.94E-07 |
| cg13674174 | chr1 | Island      | 0.335292174 | 0.048841421 | -0.286451 | 1.02E-05 |
| cg23586659 | chr1 | Open Sea    | 0.861425954 | 0.575615396 | -0.285811 | 0.035722 |
| cg21297493 | chr1 | North Shore | 0.473746704 | 0.188087698 | -0.285659 | 0.002528 |
| cg03422911 | chr1 | Island      | 0.415114229 | 0.130169746 | -0.284944 | 0.003133 |
| cg17799946 | chr1 | South Shore | 0.353023907 | 0.068314777 | -0.284709 | 6.29E-05 |
| cg00644823 | chr1 | Island      | 0.398404584 | 0.115298567 | -0.283106 | 3.55E-05 |
| cg20825110 | chr1 | Open Sea    | 0.566545903 | 0.284086328 | -0.28246  | 8.99E-06 |
| cg19274341 | chr1 | Open Sea    | 0.661192026 | 0.379357817 | -0.281834 | 1.82E-07 |
| cg09896412 | chr1 | Island      | 0.317119328 | 0.035763516 | -0.281356 | 3.45E-06 |
| cg19746897 | chr1 | Open Sea    | 0.401491286 | 0.120299873 | -0.281191 | 0.005038 |
| cg25980637 | chr1 | Island      | 0.390956555 | 0.110042297 | -0.280914 | 0.011589 |
| cg03343063 | chr1 | Open Sea    | 0.371109161 | 0.090417265 | -0.280692 | 0.000109 |
| cg06849504 | chr1 | Island      | 0.399732768 | 0.120446263 | -0.279287 | 0.000199 |
| cg15043057 | chr1 | North Shore | 0.411007372 | 0.132086322 | -0.278921 | 2.45E-05 |
| cg18279094 | chr1 | Island      | 0.323713038 | 0.045722764 | -0.277799 | 4.63E-05 |
| cg02993069 | chr1 | Island      | 0.360657584 | 0.082718791 | -0.277939 | 0.000331 |
| cg07114422 | chr1 | Open Sea    | 0.710752878 | 0.434237126 | -0.276516 | 0.000226 |
| cg24051554 | chr1 | Island      | 0.373742027 | 0.097825447 | -0.275917 | 0.003127 |
| cg00279406 | chr1 | Island      | 0.508213255 | 0.232820944 | -0.275392 | 1.9E-06  |
| cg06882842 | chr1 | South Shelf | 0.654696445 | 0.379881233 | -0.274815 | 6.53E-06 |
| cg16359901 | chr1 | South Shore | 0.37637308  | 0.101669447 | -0.274704 | 1.04E-05 |
| cg01396157 | chr1 | North Shore | 0.439333185 | 0.165877174 | -0.273456 | 0.039495 |
| cg13209762 | chr1 | Open Sea    | 0.509354455 | 0.236223933 | -0.273131 | 5.5E-07  |
| cg02971581 | chr1 | Island      | 0.394645807 | 0.121782649 | -0.272863 | 0.007194 |
| cg00503383 | chr1 | Island      | 0.344848481 | 0.072750368 | -0.272098 | 0.000556 |
| cg10376286 | chr1 | North Shore | 0.418295838 | 0.146692239 | -0.271604 | 0.038037 |
| cg21273275 | chr1 | Island      | 0.387771351 | 0.116829083 | -0.270942 | 0.004037 |
| cg11067964 | chr1 | Open Sea    | 0.76822146  | 0.497516449 | -0.270705 | 0.006448 |
| cg13457165 | chr1 | Island      | 0.398352945 | 0.128238072 | -0.270115 | 0.000219 |
| cg12065138 | chr1 | North Shore | 0.347135613 | 0.07888636  | -0.268249 | 0.001505 |
| cg03216846 | chr1 | Island      | 0.362244474 | 0.094207082 | -0.268037 | 0.001405 |
| cg23619357 | chr1 | North Shore | 0.363144445 | 0.095573112 | -0.267571 | 0.000194 |
| cg19404444 | chr1 | South Shelf | 0.370007871 | 0.102670064 | -0.267338 | 0.016622 |
| cg00328724 | chr1 | North Shore | 0.388676315 | 0.121549452 | -0.267127 | 0.000269 |
| cg09801607 | chr1 | North Shore | 0.434039452 | 0.167107438 | -0.266932 | 0.000261 |
| cg08231710 | chr1 | Island      | 0.378706263 | 0.112257483 | -0.266449 | 0.018604 |
| cg24332710 | chr1 | North Shore | 0.461872953 | 0.195701438 | -0.266172 | 0.020101 |

|            |      |             |             |             |           |          |
|------------|------|-------------|-------------|-------------|-----------|----------|
| cg11413763 | chr1 | Open Sea    | 0.864130818 | 0.59899785  | -0.265133 | 5.98E-10 |
| cg02658730 | chr1 | North Shore | 0.551298816 | 0.286412528 | -0.264886 | 0.0022   |
| cg13385114 | chr1 | Open Sea    | 0.691610704 | 0.42717745  | -0.264433 | 0.005145 |
| cg11216632 | chr1 | North Shelf | 0.401706365 | 0.137474724 | -0.264232 | 4.09E-06 |
| cg02951552 | chr1 | Island      | 0.297596373 | 0.033392514 | -0.264204 | 6.86E-06 |
| cg08024029 | chr1 | Island      | 0.341340814 | 0.077706651 | -0.263634 | 3.98E-06 |
| cg23028178 | chr1 | South Shore | 0.766903334 | 0.505929398 | -0.260974 | 0.004074 |
| cg26015416 | chr1 | South Shore | 0.331182901 | 0.070727238 | -0.260456 | 0.000306 |
| cg09871685 | chr1 | North Shore | 0.328265762 | 0.067992205 | -0.260274 | 0.000264 |
| cg10096122 | chr1 | Open Sea    | 0.711422256 | 0.451199016 | -0.260223 | 0.000255 |
| cg16516400 | chr1 | South Shore | 0.356475748 | 0.097022253 | -0.259453 | 1.05E-05 |
| cg11721610 | chr1 | Open Sea    | 0.373864752 | 0.114751052 | -0.259114 | 0.002139 |
| cg05814106 | chr1 | South Shelf | 0.874146661 | 0.615256388 | -0.25889  | 0.000944 |
| cg20418507 | chr1 | Open Sea    | 0.874907195 | 0.617427832 | -0.257479 | 0.01461  |
| cg26407558 | chr1 | Open Sea    | 0.751443871 | 0.495041485 | -0.256402 | 0.001943 |
| cg21929761 | chr1 | North Shelf | 0.676806891 | 0.420464263 | -0.256343 | 0.007611 |
| cg15897635 | chr1 | North Shelf | 0.498077293 | 0.241784873 | -0.256292 | 0.010492 |
| cg22438763 | chr1 | Island      | 0.348785941 | 0.093052308 | -0.255734 | 0.000761 |
| cg00554413 | chr1 | Island      | 0.333847351 | 0.078295481 | -0.255552 | 1.16E-05 |
| cg16735509 | chr1 | North Shelf | 0.58587624  | 0.330666804 | -0.255209 | 0.000546 |
| cg16266126 | chr1 | Open Sea    | 0.761959785 | 0.506892716 | -0.255067 | 7.57E-06 |
| cg00484358 | chr1 | Island      | 0.521480666 | 0.266546927 | -0.254934 | 0.000944 |
| cg00338002 | chr1 | North Shore | 0.368375771 | 0.113807898 | -0.254568 | 0.000115 |
| cg11673291 | chr1 | Island      | 0.337141061 | 0.082743743 | -0.254397 | 0.02229  |
| cg01869896 | chr1 | North Shore | 0.651316737 | 0.397438475 | -0.253878 | 0.025856 |
| cg09510180 | chr1 | Island      | 0.42123632  | 0.167723082 | -0.253513 | 0.015557 |
| cg19903196 | chr1 | Open Sea    | 0.657791854 | 0.404544531 | -0.253247 | 0.004711 |
| cg26160564 | chr1 | South Shelf | 0.78993519  | 0.53815236  | -0.251783 | 0.036559 |
| cg17443359 | chr1 | North Shore | 0.393998555 | 0.142290056 | -0.251708 | 0.001176 |
| cg25018801 | chr1 | South Shore | 0.347924563 | 0.099725842 | -0.248199 | 0.000847 |
| cg23114616 | chr1 | South Shore | 0.542958353 | 0.295034815 | -0.247924 | 0.006251 |
| cg02854937 | chr1 | Open Sea    | 0.37842354  | 0.130680973 | -0.247743 | 0.021073 |
| cg13579607 | chr1 | Open Sea    | 0.312464764 | 0.06500556  | -0.247459 | 2.57E-05 |
| cg16733203 | chr1 | Open Sea    | 0.670891708 | 0.424388849 | -0.246503 | 0.008811 |
| cg00433406 | chr1 | Open Sea    | 0.774905432 | 0.528684654 | -0.246221 | 0.03716  |
| cg00794400 | chr1 | Island      | 0.378081909 | 0.133028637 | -0.245053 | 0.013728 |
| cg20945221 | chr1 | Open Sea    | 0.727415182 | 0.484603973 | -0.242811 | 0.000383 |
| cg08638320 | chr1 | Island      | 0.465175232 | 0.222589196 | -0.242586 | 0.004504 |
| cg09068158 | chr1 | Island      | 0.428476904 | 0.186005418 | -0.242471 | 0.00088  |
| cg16120415 | chr1 | Open Sea    | 0.301568787 | 0.059444638 | -0.242124 | 0.000911 |
| cg27569174 | chr1 | Open Sea    | 0.83042384  | 0.58860006  | -0.241824 | 0.018794 |
| cg25217317 | chr1 | Island      | 0.373886342 | 0.133480367 | -0.240406 | 0.0004   |
| cg20415053 | chr1 | Open Sea    | 0.341857457 | 0.102369713 | -0.239488 | 0.014181 |
| cg20387429 | chr1 | North Shore | 0.525668318 | 0.286354709 | -0.239314 | 0.000431 |
| cg27558693 | chr1 | Open Sea    | 0.271388465 | 0.032321605 | -0.239067 | 1.95E-05 |
| cg10945917 | chr1 | Open Sea    | 0.296467917 | 0.057726286 | -0.238742 | 0.000102 |
| cg26885488 | chr1 | Open Sea    | 0.399334048 | 0.161053674 | -0.23828  | 1.21E-05 |
| cg23024254 | chr1 | South Shelf | 0.747490133 | 0.50925539  | -0.238235 | 1.14E-05 |
| cg04929703 | chr1 | North Shore | 0.40675183  | 0.170830941 | -0.235921 | 0.004537 |
| cg04276058 | chr1 | Open Sea    | 0.386360728 | 0.150949016 | -0.235412 | 0.003147 |

|            |      |             |             |             |           |          |
|------------|------|-------------|-------------|-------------|-----------|----------|
| cg14378231 | chr1 | Open Sea    | 0.771135124 | 0.535829869 | -0.235305 | 0.011032 |
| cg22224597 | chr1 | Island      | 0.321843363 | 0.086603178 | -0.23524  | 7.5E-05  |
| cg05888252 | chr1 | Open Sea    | 0.850254014 | 0.615102649 | -0.235151 | 0.002408 |
| cg18866281 | chr1 | North Shelf | 0.312883512 | 0.078148491 | -0.234735 | 0.001867 |
| cg23670372 | chr1 | Open Sea    | 0.742160951 | 0.508020331 | -0.234141 | 0.019819 |
| cg23054189 | chr1 | Island      | 0.269052097 | 0.034994339 | -0.234058 | 0.00049  |
| cg22434763 | chr1 | Island      | 0.661675489 | 0.428158661 | -0.233517 | 1.34E-05 |
| cg12434982 | chr1 | Island      | 0.678425598 | 0.445585595 | -0.23284  | 0.000197 |
| cg26422458 | chr1 | Island      | 0.294587445 | 0.062380791 | -0.232207 | 2.82E-05 |
| cg16549694 | chr1 | Open Sea    | 0.309552339 | 0.077723385 | -0.231829 | 0.000744 |
| cg06154570 | chr1 | South Shore | 0.393141018 | 0.161583593 | -0.231557 | 0.049508 |
| cg00702647 | chr1 | Open Sea    | 0.27067087  | 0.039526488 | -0.231144 | 0.001752 |
| cg17077288 | chr1 | North Shore | 0.321422493 | 0.090907598 | -0.230515 | 2.05E-05 |
| cg13529755 | chr1 | Island      | 0.311070338 | 0.080648365 | -0.230422 | 0.000108 |
| cg17327404 | chr1 | Open Sea    | 0.857623119 | 0.627351868 | -0.230271 | 0.036174 |
| cg12749132 | chr1 | Island      | 0.297239259 | 0.067036724 | -0.230203 | 0.000222 |
| cg13870102 | chr1 | Island      | 0.313147027 | 0.083735224 | -0.229412 | 3.85E-05 |
| cg00318756 | chr1 | North Shore | 0.307821956 | 0.078767813 | -0.229054 | 0.00016  |
| cg10323725 | chr1 | Island      | 0.259506784 | 0.030670164 | -0.228837 | 0.000113 |
| cg02710296 | chr1 | Island      | 0.452244037 | 0.223407503 | -0.228837 | 0.047098 |
| cg20785674 | chr1 | South Shore | 0.314059034 | 0.086310578 | -0.227748 | 0.001914 |
| cg01802640 | chr1 | Island      | 0.320611289 | 0.093182076 | -0.227429 | 0.033504 |
| cg17928286 | chr1 | Open Sea    | 0.407596023 | 0.180677485 | -0.226919 | 0.001284 |
| cg20970369 | chr1 | North Shelf | 0.539424773 | 0.313917538 | -0.225507 | 0.007991 |
| cg07181257 | chr1 | South Shore | 0.931426271 | 0.70691177  | -0.224515 | 0.027371 |
| cg00059459 | chr1 | Open Sea    | 0.38900358  | 0.164806649 | -0.224197 | 0.000677 |
| cg02431672 | chr1 | Island      | 0.300990854 | 0.076899782 | -0.224091 | 0.00084  |
| cg26093148 | chr1 | North Shelf | 0.595429553 | 0.371746754 | -0.223683 | 0.002266 |
| cg24346905 | chr1 | Island      | 0.32797573  | 0.104713381 | -0.223262 | 0.007033 |
| cg07158747 | chr1 | South Shelf | 0.379022287 | 0.156848114 | -0.222174 | 0.032319 |
| cg02584756 | chr1 | North Shore | 0.323227678 | 0.101313992 | -0.221914 | 0.000236 |
| cg03731202 | chr1 | Open Sea    | 0.280895305 | 0.059670953 | -0.221224 | 0.002794 |
| cg27181349 | chr1 | Open Sea    | 0.292867445 | 0.07165855  | -0.221209 | 0.008015 |
| cg16552822 | chr1 | North Shelf | 0.291824088 | 0.070768985 | -0.221055 | 0.001508 |
| cg16020346 | chr1 | Open Sea    | 0.525804586 | 0.305039821 | -0.220765 | 0.017168 |
| cg11965966 | chr1 | South Shelf | 0.67859881  | 0.458522746 | -0.220076 | 0.027933 |
| cg18131548 | chr1 | North Shore | 0.324956889 | 0.105952452 | -0.219004 | 0.015944 |
| cg15896892 | chr1 | South Shore | 0.353023705 | 0.134693905 | -0.21833  | 0.029753 |
| cg07557690 | chr1 | South Shore | 0.311089566 | 0.092969963 | -0.21812  | 0.035121 |
| cg04553810 | chr1 | Open Sea    | 0.264149948 | 0.046039261 | -0.218111 | 0.001049 |
| cg02898904 | chr1 | South Shelf | 0.744039929 | 0.526258584 | -0.217781 | 0.020921 |
| cg06352803 | chr1 | North Shore | 0.36433855  | 0.146956275 | -0.217382 | 0.013792 |
| cg21165064 | chr1 | North Shelf | 0.24843313  | 0.031121268 | -0.217312 | 2.21E-05 |
| cg25192855 | chr1 | North Shore | 0.330691202 | 0.113684757 | -0.217006 | 0.001187 |
| cg26048025 | chr1 | Island      | 0.544689275 | 0.327804772 | -0.216885 | 0.002885 |
| cg16400631 | chr1 | North Shore | 0.327263419 | 0.110409306 | -0.216854 | 0.000682 |
| cg14271665 | chr1 | Island      | 0.27463686  | 0.057988574 | -0.216648 | 0.000722 |
| cg10717691 | chr1 | Open Sea    | 0.682644237 | 0.466060701 | -0.216584 | 0.04254  |
| cg27549944 | chr1 | Open Sea    | 0.331048091 | 0.11473644  | -0.216312 | 0.00242  |
| cg24080008 | chr1 | Open Sea    | 0.344407616 | 0.128143613 | -0.216264 | 0.0021   |

|            |      |             |             |             |           |          |
|------------|------|-------------|-------------|-------------|-----------|----------|
| cg01074657 | chr1 | North Shore | 0.338645213 | 0.123013684 | -0.215632 | 0.023773 |
| cg09180564 | chr1 | Open Sea    | 0.299933727 | 0.084461259 | -0.215472 | 0.005235 |
| cg03893150 | chr1 | South Shore | 0.359818663 | 0.14495471  | -0.214864 | 0.015412 |
| cg02202305 | chr1 | Island      | 0.318649144 | 0.104049719 | -0.214599 | 0.002928 |
| cg17045772 | chr1 | North Shore | 0.890525448 | 0.676188797 | -0.214337 | 0.040082 |
| cg18645642 | chr1 | Open Sea    | 0.845292803 | 0.631182659 | -0.21411  | 6.76E-05 |
| cg09269866 | chr1 | Island      | 0.308830129 | 0.095049346 | -0.213781 | 0.00017  |
| cg14653136 | chr1 | North Shelf | 0.287531881 | 0.074879086 | -0.212653 | 9.26E-05 |
| cg20707323 | chr1 | Island      | 0.324377437 | 0.111873816 | -0.212504 | 0.000647 |
| cg01729262 | chr1 | North Shore | 0.612416922 | 0.399998609 | -0.212418 | 6.48E-05 |
| cg17491622 | chr1 | North Shore | 0.27333098  | 0.061980883 | -0.21135  | 0.000114 |
| cg15986668 | chr1 | North Shore | 0.58781221  | 0.377206227 | -0.210606 | 3.55E-05 |
| cg11659961 | chr1 | North Shore | 0.251181249 | 0.041053314 | -0.210128 | 0.001156 |
| cg00352913 | chr1 | Open Sea    | 0.853521254 | 0.64346259  | -0.210059 | 0.032473 |
| cg18153869 | chr1 | Island      | 0.390117268 | 0.180149766 | -0.209968 | 0.002425 |
| cg27226320 | chr1 | North Shelf | 0.267987695 | 0.058172402 | -0.209815 | 0.001262 |
| cg04296699 | chr1 | Island      | 0.299677348 | 0.09019845  | -0.209479 | 0.016713 |
| cg12639453 | chr1 | North Shelf | 0.608717248 | 0.399292477 | -0.209425 | 0.033362 |
| cg19360104 | chr1 | Island      | 0.474369269 | 0.265151868 | -0.209217 | 0.022438 |
| cg08623787 | chr1 | Open Sea    | 0.306773541 | 0.097718311 | -0.209055 | 0.000804 |
| cg02493846 | chr1 | North Shore | 0.358538499 | 0.149696115 | -0.208842 | 0.006666 |
| cg26435254 | chr1 | Open Sea    | 0.296100062 | 0.087390272 | -0.20871  | 8.13E-06 |
| cg00664416 | chr1 | South Shore | 0.328304168 | 0.120435684 | -0.207868 | 0.003334 |
| cg24577933 | chr1 | Island      | 0.315089257 | 0.107321174 | -0.207768 | 0.029286 |
| cg13073141 | chr1 | South Shore | 0.762060199 | 0.554424015 | -0.207636 | 0.008163 |
| cg17215278 | chr1 | South Shore | 0.516648094 | 0.309029416 | -0.207619 | 0.000244 |
| cg08589721 | chr1 | North Shore | 0.254696884 | 0.047164838 | -0.207532 | 0.002269 |
| cg00292669 | chr1 | South Shore | 0.553374491 | 0.34662515  | -0.206749 | 0.027007 |
| cg09754272 | chr1 | Open Sea    | 0.266222007 | 0.059768732 | -0.206453 | 0.000519 |
| cg14663264 | chr1 | Island      | 0.400757226 | 0.194544439 | -0.206213 | 0.000736 |
| cg11857093 | chr1 | Open Sea    | 0.249472392 | 0.043350695 | -0.206122 | 0.000264 |
| cg05338187 | chr1 | North Shore | 0.469442656 | 0.263378788 | -0.206064 | 0.003096 |
| cg26157385 | chr1 | Island      | 0.282972309 | 0.077066992 | -0.205905 | 0.001588 |
| cg05262549 | chr1 | Open Sea    | 0.666648958 | 0.460748634 | -0.2059   | 0.018146 |
| cg24596898 | chr1 | Island      | 0.276281505 | 0.070887839 | -0.205394 | 0.001004 |
| cg02363950 | chr1 | South Shore | 0.295260572 | 0.08996955  | -0.205291 | 0.00285  |
| cg16021223 | chr1 | Open Sea    | 0.673508026 | 0.469024298 | -0.204484 | 0.049295 |
| cg13017614 | chr1 | North Shore | 0.7098714   | 0.505437456 | -0.204434 | 0.004817 |
| cg10778636 | chr1 | North Shore | 0.810032566 | 0.605901695 | -0.204131 | 0.022199 |
| cg07718444 | chr1 | South Shore | 0.446153631 | 0.242521356 | -0.203632 | 0.009897 |
| cg17743381 | chr1 | Open Sea    | 0.47772689  | 0.274586054 | -0.203141 | 0.028692 |
| cg15676418 | chr1 | South Shore | 0.292761996 | 0.08979582  | -0.202966 | 0.000367 |
| cg04977528 | chr1 | Open Sea    | 0.561997223 | 0.359433115 | -0.202564 | 0.038968 |
| cg16028753 | chr1 | North Shore | 0.293827886 | 0.091792576 | -0.202035 | 7.6E-05  |
| cg13782884 | chr1 | Island      | 0.241293429 | 0.039327324 | -0.201966 | 0.000819 |
| cg14518596 | chr1 | South Shore | 0.539082075 | 0.337243732 | -0.201838 | 0.047139 |
| cg23732845 | chr1 | Island      | 0.414965909 | 0.213173734 | -0.201792 | 0.001133 |
| cg24373253 | chr1 | North Shore | 0.456683717 | 0.254933752 | -0.20175  | 0.000725 |
| cg20016673 | chr1 | Island      | 0.36743459  | 0.165769913 | -0.201665 | 0.008246 |
| cg11256802 | chr1 | Island      | 0.372810033 | 0.171636512 | -0.201174 | 0.014188 |

|            |       |             |             |             |           |          |
|------------|-------|-------------|-------------|-------------|-----------|----------|
| cg18713316 | chr1  | Island      | 0.544612939 | 0.343446455 | -0.201166 | 0.004436 |
| cg13899718 | chr1  | Island      | 0.304003377 | 0.103000745 | -0.201003 | 0.001003 |
| cg07119434 | chr1  | North Shore | 0.236529322 | 0.035640087 | -0.200889 | 0.000432 |
| cg17941572 | chr1  | Island      | 0.319197185 | 0.118381822 | -0.200815 | 0.001274 |
| cg01004056 | chr1  | North Shore | 0.254263819 | 0.053502786 | -0.200761 | 0.000712 |
| cg07786675 | chr1  | Island      | 0.812652801 | 0.612023631 | -0.200629 | 0.029113 |
| cg07356745 | chr10 | Open Sea    | 0.673945188 | 0.150189558 | -0.523756 | 0.003342 |
| cg06850005 | chr10 | North Shore | 0.562563389 | 0.108365415 | -0.454198 | 0.000473 |
| cg26605164 | chr10 | Island      | 0.551399021 | 0.112334464 | -0.439065 | 0.011682 |
| cg00244001 | chr10 | Open Sea    | 0.52981903  | 0.0951584   | -0.434661 | 7.97E-06 |
| cg03701930 | chr10 | Open Sea    | 0.591964036 | 0.160907818 | -0.431056 | 4.73E-06 |
| cg05194426 | chr10 | South Shore | 0.574026718 | 0.152740902 | -0.421286 | 0.000572 |
| cg17481047 | chr10 | Island      | 0.552838535 | 0.155267105 | -0.397571 | 0.001088 |
| cg13269555 | chr10 | Island      | 0.553814356 | 0.165452577 | -0.388362 | 0.005674 |
| cg02185052 | chr10 | South Shore | 0.503968626 | 0.118535487 | -0.385433 | 0.000106 |
| cg10158681 | chr10 | Open Sea    | 0.511122638 | 0.135240281 | -0.375882 | 0.003007 |
| cg09933190 | chr10 | South Shore | 0.475016867 | 0.111016779 | -0.364    | 0.002706 |
| cg25065716 | chr10 | Open Sea    | 0.684882455 | 0.320948201 | -0.363934 | 8.09E-09 |
| cg07014438 | chr10 | South Shore | 0.406270539 | 0.048727397 | -0.357543 | 2.94E-07 |
| cg04926193 | chr10 | Open Sea    | 0.49188627  | 0.137878924 | -0.354007 | 0.000561 |
| cg11426080 | chr10 | Open Sea    | 0.557407641 | 0.207194742 | -0.350213 | 0.000822 |
| cg10831642 | chr10 | Open Sea    | 0.714776389 | 0.369220401 | -0.345556 | 0.013292 |
| cg01309726 | chr10 | South Shelf | 0.666365567 | 0.321861472 | -0.344504 | 0.016193 |
| cg07226162 | chr10 | South Shelf | 0.479340801 | 0.137790877 | -0.34155  | 6.32E-05 |
| cg09216670 | chr10 | North Shelf | 0.554377269 | 0.215550014 | -0.338827 | 0.02279  |
| cg14082061 | chr10 | Open Sea    | 0.588636087 | 0.250388811 | -0.338247 | 1.83E-07 |
| cg07637516 | chr10 | South Shelf | 0.391513619 | 0.056527002 | -0.334987 | 2.12E-06 |
| cg11174855 | chr10 | Island      | 0.380624717 | 0.050966879 | -0.329658 | 3.64E-06 |
| cg03448754 | chr10 | Open Sea    | 0.624375063 | 0.297285801 | -0.327089 | 0.003083 |
| cg07451524 | chr10 | Island      | 0.521372382 | 0.197223482 | -0.324149 | 0.000425 |
| cg25756406 | chr10 | Island      | 0.64515981  | 0.325351953 | -0.319808 | 1.09E-05 |
| cg16484473 | chr10 | Open Sea    | 0.695007255 | 0.375355458 | -0.319652 | 0.002948 |
| cg17544177 | chr10 | Island      | 0.750513773 | 0.443791426 | -0.306722 | 0.015055 |
| cg26820037 | chr10 | North Shore | 0.451061873 | 0.145248258 | -0.305814 | 9E-06    |
| cg17805624 | chr10 | Island      | 0.417037345 | 0.115664271 | -0.301373 | 0.012171 |
| cg11455642 | chr10 | Open Sea    | 0.431223124 | 0.130749634 | -0.300473 | 0.000625 |
| cg10119075 | chr10 | Open Sea    | 0.362735287 | 0.063256371 | -0.299479 | 0.000174 |
| cg00744431 | chr10 | Open Sea    | 0.655783673 | 0.356617526 | -0.299166 | 0.002144 |
| cg14320530 | chr10 | Island      | 0.433786498 | 0.137776647 | -0.29601  | 0.016304 |
| cg24435571 | chr10 | Open Sea    | 0.365006199 | 0.071238243 | -0.293768 | 0.000115 |
| cg26186546 | chr10 | Open Sea    | 0.834517173 | 0.545247923 | -0.289269 | 0.007948 |
| cg24831879 | chr10 | North Shore | 0.877724436 | 0.59022636  | -0.287498 | 0.048912 |
| cg06513979 | chr10 | Open Sea    | 0.790048522 | 0.504854994 | -0.285194 | 0.041915 |
| cg15405515 | chr10 | Open Sea    | 0.59590041  | 0.312907186 | -0.282993 | 0.000849 |
| cg06075311 | chr10 | North Shore | 0.352084779 | 0.069771593 | -0.282313 | 0.01676  |
| cg10258719 | chr10 | North Shore | 0.502029167 | 0.226209537 | -0.27582  | 0.018681 |
| cg25164589 | chr10 | Open Sea    | 0.364167301 | 0.089789249 | -0.274378 | 0.000442 |
| cg15444831 | chr10 | Open Sea    | 0.737172204 | 0.463907807 | -0.273264 | 0.000255 |
| cg15254238 | chr10 | South Shore | 0.525005863 | 0.252489515 | -0.272516 | 4.81E-05 |
| cg09958065 | chr10 | Open Sea    | 0.418503899 | 0.147872121 | -0.270632 | 0.000525 |

|            |       |             |             |             |           |          |
|------------|-------|-------------|-------------|-------------|-----------|----------|
| cg17092956 | chr10 | Open Sea    | 0.450663377 | 0.187152657 | -0.263511 | 0.023685 |
| cg24539517 | chr10 | Open Sea    | 0.329491017 | 0.067361388 | -0.26213  | 0.00092  |
| cg26511108 | chr10 | South Shelf | 0.382521167 | 0.12100657  | -0.261515 | 0.041885 |
| cg15616382 | chr10 | Island      | 0.310977257 | 0.050038099 | -0.260939 | 3.55E-05 |
| cg25672060 | chr10 | Open Sea    | 0.578717778 | 0.317998402 | -0.260719 | 0.010562 |
| cg02773436 | chr10 | Open Sea    | 0.636900492 | 0.377792713 | -0.259108 | 5.66E-06 |
| cg16005271 | chr10 | North Shore | 0.424610703 | 0.167973506 | -0.256637 | 0.003334 |
| cg12060422 | chr10 | Island      | 0.332478233 | 0.079512319 | -0.252966 | 0.001923 |
| cg03541338 | chr10 | North Shore | 0.289290214 | 0.037129056 | -0.252161 | 3.58E-05 |
| cg11736657 | chr10 | North Shore | 0.813062046 | 0.561282089 | -0.25178  | 0.001973 |
| cg16063312 | chr10 | Island      | 0.380586789 | 0.131896316 | -0.24869  | 0.001361 |
| cg26067760 | chr10 | South Shelf | 0.338295094 | 0.089653546 | -0.248642 | 0.003524 |
| cg03891590 | chr10 | North Shore | 0.334266434 | 0.086373009 | -0.247893 | 0.000601 |
| cg19993680 | chr10 | Open Sea    | 0.752874772 | 0.506332237 | -0.246543 | 0.019639 |
| cg17766305 | chr10 | Open Sea    | 0.349202028 | 0.103099036 | -0.246103 | 5.89E-07 |
| cg15320596 | chr10 | Open Sea    | 0.756101383 | 0.511815236 | -0.244286 | 0.031861 |
| cg08815081 | chr10 | South Shore | 0.344130378 | 0.101219055 | -0.242911 | 0.005552 |
| cg02449166 | chr10 | Open Sea    | 0.351775959 | 0.109086857 | -0.242689 | 0.001408 |
| cg27065896 | chr10 | Open Sea    | 0.690209667 | 0.447572756 | -0.242637 | 0.013646 |
| cg02989244 | chr10 | Open Sea    | 0.311692412 | 0.070202829 | -0.24149  | 0.000143 |
| cg14462779 | chr10 | Island      | 0.49447022  | 0.253277712 | -0.241193 | 8.37E-06 |
| cg12265908 | chr10 | Open Sea    | 0.855657726 | 0.614789688 | -0.240868 | 2.93E-06 |
| cg08423533 | chr10 | Island      | 0.375507523 | 0.136741132 | -0.238766 | 0.004073 |
| cg19914904 | chr10 | North Shore | 0.675036051 | 0.437772773 | -0.237263 | 6.76E-05 |
| cg00690609 | chr10 | South Shore | 0.334971453 | 0.098659458 | -0.236312 | 0.001194 |
| cg25024734 | chr10 | Open Sea    | 0.287969901 | 0.051752083 | -0.236218 | 2.33E-05 |
| cg04736112 | chr10 | Island      | 0.267492081 | 0.031811471 | -0.235681 | 1.19E-05 |
| cg01301803 | chr10 | North Shore | 0.311806878 | 0.076154297 | -0.235653 | 0.002899 |
| cg14302224 | chr10 | North Shore | 0.308858412 | 0.073985013 | -0.234873 | 0.00451  |
| cg16697438 | chr10 | Island      | 0.316599444 | 0.08203644  | -0.234563 | 0.026639 |
| cg17608529 | chr10 | Open Sea    | 0.692162644 | 0.45767915  | -0.234483 | 0.036993 |
| cg18440692 | chr10 | South Shelf | 0.384949525 | 0.150735731 | -0.234214 | 0.008191 |
| cg03179435 | chr10 | Open Sea    | 0.301183459 | 0.068309634 | -0.232874 | 0.004206 |
| cg13933080 | chr10 | Island      | 0.413490147 | 0.182126125 | -0.231364 | 7.43E-06 |
| cg23223933 | chr10 | Island      | 0.576088729 | 0.34528399  | -0.230805 | 0.031058 |
| cg22962619 | chr10 | Open Sea    | 0.825967668 | 0.595520361 | -0.230447 | 0.000569 |
| cg13315147 | chr10 | Island      | 0.323121669 | 0.093596849 | -0.229525 | 8.54E-05 |
| cg14699146 | chr10 | Open Sea    | 0.798900495 | 0.571056966 | -0.227844 | 0.040787 |
| cg13905757 | chr10 | North Shore | 0.410132521 | 0.183403429 | -0.226729 | 0.00044  |
| cg18659867 | chr10 | Open Sea    | 0.557012061 | 0.334491074 | -0.22521  | 0.000176 |
| cg26152017 | chr10 | Open Sea    | 0.335528427 | 0.113637623 | -0.221891 | 0.040182 |
| cg08539872 | chr10 | Open Sea    | 0.294933402 | 0.073751342 | -0.221182 | 0.003063 |
| cg05734675 | chr10 | Open Sea    | 0.292627733 | 0.071707136 | -0.220921 | 0.000126 |
| cg24002541 | chr10 | Open Sea    | 0.63765464  | 0.418242495 | -0.219412 | 0.002122 |
| cg04159420 | chr10 | South Shore | 0.484971649 | 0.266848979 | -0.218123 | 0.033975 |
| cg27021181 | chr10 | North Shore | 0.310486996 | 0.092743798 | -0.217743 | 0.003359 |
| cg03798045 | chr10 | Open Sea    | 0.532069165 | 0.314385041 | -0.217684 | 0.006938 |
| cg27511461 | chr10 | Open Sea    | 0.922939029 | 0.706850764 | -0.216088 | 1.81E-09 |
| cg16311536 | chr10 | Island      | 0.343637164 | 0.127737595 | -0.2159   | 0.047048 |
| cg08567142 | chr10 | Open Sea    | 0.313800104 | 0.098647856 | -0.215152 | 0.004926 |

|            |       |             |             |             |           |          |
|------------|-------|-------------|-------------|-------------|-----------|----------|
| cg06550984 | chr10 | North Shore | 0.288054916 | 0.074622348 | -0.213433 | 0.001122 |
| cg04492228 | chr10 | South Shore | 0.556986043 | 0.343849831 | -0.213136 | 0.009823 |
| cg25104397 | chr10 | Open Sea    | 0.274594251 | 0.061458064 | -0.213136 | 0.00077  |
| cg12420900 | chr10 | Island      | 0.278109368 | 0.066932382 | -0.211177 | 0.001694 |
| cg22757362 | chr10 | North Shelf | 0.344544763 | 0.133514994 | -0.21103  | 5.19E-05 |
| cg15203735 | chr10 | Open Sea    | 0.263319342 | 0.052401273 | -0.210918 | 0.000981 |
| cg09978996 | chr10 | South Shore | 0.324952    | 0.11424255  | -0.210709 | 0.000427 |
| cg04837832 | chr10 | Island      | 0.289762997 | 0.080013879 | -0.209749 | 0.000875 |
| cg14824052 | chr10 | Open Sea    | 0.619651576 | 0.410571754 | -0.20908  | 0.018211 |
| cg11716598 | chr10 | Island      | 0.421092363 | 0.214292771 | -0.2068   | 8.21E-06 |
| cg04972745 | chr10 | Island      | 0.308375191 | 0.102002257 | -0.206373 | 0.001398 |
| cg19862769 | chr10 | Open Sea    | 0.70794922  | 0.502005809 | -0.205943 | 0.008418 |
| cg17915961 | chr10 | South Shore | 0.31038807  | 0.10454678  | -0.205841 | 0.019363 |
| cg01512840 | chr10 | Open Sea    | 0.406758688 | 0.201075854 | -0.205683 | 0.016387 |
| cg02634414 | chr10 | North Shore | 0.312675829 | 0.107798282 | -0.204878 | 0.006515 |
| cg11445109 | chr10 | South Shore | 0.249038588 | 0.045166087 | -0.203873 | 0.000147 |
| cg23610453 | chr10 | Island      | 0.279428029 | 0.076343682 | -0.203084 | 0.003227 |
| cg02161900 | chr10 | South Shore | 0.27360667  | 0.07072762  | -0.202879 | 0.00012  |
| cg10936879 | chr10 | Open Sea    | 0.287601312 | 0.085227052 | -0.202374 | 0.002314 |
| cg02689489 | chr10 | Island      | 0.300959289 | 0.098888312 | -0.202071 | 0.009083 |
| cg13912027 | chr11 | Open Sea    | 0.719143091 | 0.085289974 | -0.633853 | 7.12E-05 |
| cg13300301 | chr11 | South Shore | 0.715851089 | 0.220988282 | -0.494863 | 0.001072 |
| cg08533336 | chr11 | Island      | 0.556123724 | 0.076481719 | -0.479642 | 5.2E-05  |
| cg02856190 | chr11 | South Shelf | 0.705464963 | 0.231898378 | -0.473567 | 0.020097 |
| cg03983837 | chr11 | Open Sea    | 0.537495017 | 0.09199263  | -0.445502 | 1.53E-11 |
| cg11608884 | chr11 | Island      | 0.645755553 | 0.2136941   | -0.432061 | 0.009911 |
| cg14630206 | chr11 | North Shore | 0.590413009 | 0.173299396 | -0.417114 | 0.004082 |
| cg02973171 | chr11 | Island      | 0.475371732 | 0.059382365 | -0.415989 | 4E-07    |
| cg19218057 | chr11 | Open Sea    | 0.493663936 | 0.081952953 | -0.411711 | 7.55E-10 |
| cg15579389 | chr11 | Open Sea    | 0.462272831 | 0.055952725 | -0.40632  | 3.61E-12 |
| cg06982473 | chr11 | Island      | 0.843316735 | 0.440312883 | -0.403004 | 0.029108 |
| cg03229682 | chr11 | North Shore | 0.703651962 | 0.303387102 | -0.400265 | 0.000124 |
| cg05572370 | chr11 | Open Sea    | 0.47805207  | 0.083795963 | -0.394256 | 0.000166 |
| cg20545409 | chr11 | Open Sea    | 0.497867382 | 0.106700967 | -0.391166 | 2.21E-05 |
| cg14088196 | chr11 | Open Sea    | 0.621222168 | 0.231913603 | -0.389309 | 0.000344 |
| cg05550420 | chr11 | Open Sea    | 0.599188526 | 0.218647725 | -0.380541 | 2.91E-06 |
| cg08900384 | chr11 | Open Sea    | 0.69810843  | 0.322995286 | -0.375113 | 3.64E-08 |
| cg10904972 | chr11 | Island      | 0.404944252 | 0.033018264 | -0.371926 | 4.27E-06 |
| cg04216117 | chr11 | South Shore | 0.550310382 | 0.178924068 | -0.371386 | 0.025568 |
| cg21770622 | chr11 | Open Sea    | 0.495338265 | 0.127696924 | -0.367641 | 0.000824 |
| cg02854536 | chr11 | South Shore | 0.433912979 | 0.068691222 | -0.365222 | 1.77E-07 |
| cg11261850 | chr11 | Open Sea    | 0.610001353 | 0.245801601 | -0.3642   | 0.042109 |
| cg19138538 | chr11 | South Shelf | 0.441302476 | 0.08128118  | -0.360021 | 8.67E-06 |
| cg06862136 | chr11 | Open Sea    | 0.492259201 | 0.139007273 | -0.353252 | 0.00013  |
| cg16029939 | chr11 | Island      | 0.502312042 | 0.149935381 | -0.352377 | 6.52E-05 |
| cg02845204 | chr11 | Open Sea    | 0.657109154 | 0.305976502 | -0.351133 | 8.93E-08 |
| cg01636184 | chr11 | South Shelf | 0.609382639 | 0.26127119  | -0.348111 | 0.003888 |
| cg09048129 | chr11 | Island      | 0.445055296 | 0.100062113 | -0.344993 | 7.77E-06 |
| cg11775521 | chr11 | Island      | 0.431674366 | 0.089458076 | -0.342216 | 3.31E-06 |
| cg25774643 | chr11 | Island      | 0.408211708 | 0.066182556 | -0.342029 | 0.000116 |

|            |       |             |             |             |           |          |
|------------|-------|-------------|-------------|-------------|-----------|----------|
| cg24769295 | chr11 | Island      | 0.902200746 | 0.563414245 | -0.338787 | 0.017696 |
| cg19624354 | chr11 | Open Sea    | 0.60663133  | 0.276827551 | -0.329804 | 0.021394 |
| cg10637688 | chr11 | North Shore | 0.436439949 | 0.108144937 | -0.328295 | 0.017832 |
| cg05038268 | chr11 | Island      | 0.379806197 | 0.052025412 | -0.327781 | 2.32E-06 |
| cg01900413 | chr11 | Island      | 0.402896195 | 0.076274927 | -0.326621 | 7.81E-07 |
| cg26902557 | chr11 | Open Sea    | 0.482345115 | 0.156232139 | -0.326113 | 0.025668 |
| cg25538627 | chr11 | Island      | 0.374139166 | 0.049310991 | -0.324828 | 7.98E-05 |
| cg00519299 | chr11 | South Shelf | 0.4745478   | 0.152606459 | -0.321941 | 3.54E-05 |
| cg25371036 | chr11 | North Shore | 0.743175355 | 0.421932445 | -0.321243 | 5.32E-09 |
| cg19252931 | chr11 | Island      | 0.547138352 | 0.226104309 | -0.321034 | 0.010694 |
| cg08897150 | chr11 | North Shore | 0.559951524 | 0.238934361 | -0.321017 | 0.032309 |
| cg04869854 | chr11 | North Shore | 0.407300546 | 0.087829854 | -0.319471 | 0.00033  |
| cg11274172 | chr11 | Open Sea    | 0.593294212 | 0.275608334 | -0.317686 | 0.004457 |
| cg10353108 | chr11 | Island      | 0.342065612 | 0.024956969 | -0.317109 | 1.02E-05 |
| cg10336131 | chr11 | Island      | 0.466280807 | 0.150311391 | -0.315969 | 0.017325 |
| cg10689689 | chr11 | South Shore | 0.833503927 | 0.518072007 | -0.315432 | 0.036417 |
| cg14020320 | chr11 | Open Sea    | 0.449708021 | 0.134643387 | -0.315065 | 0.014116 |
| cg21293464 | chr11 | Island      | 0.414443244 | 0.101306453 | -0.313137 | 0.017474 |
| cg02184673 | chr11 | Island      | 0.393688809 | 0.080581808 | -0.313107 | 0.000116 |
| cg18081375 | chr11 | Open Sea    | 0.571122402 | 0.259530088 | -0.311592 | 1.85E-08 |
| cg15958289 | chr11 | Open Sea    | 0.403436349 | 0.092772728 | -0.310664 | 0.000776 |
| cg14133945 | chr11 | Open Sea    | 0.433754344 | 0.123141071 | -0.310613 | 0.000446 |
| cg26130242 | chr11 | Open Sea    | 0.833788611 | 0.525169142 | -0.308619 | 3.27E-12 |
| cg14373018 | chr11 | Open Sea    | 0.433245242 | 0.13216793  | -0.301077 | 0.000698 |
| cg17627559 | chr11 | Open Sea    | 0.469470999 | 0.169116282 | -0.300355 | 0.020653 |
| cg20216139 | chr11 | Island      | 0.517772984 | 0.21866844  | -0.299105 | 0.019117 |
| cg19096475 | chr11 | Island      | 0.462359277 | 0.16425874  | -0.298101 | 0.017813 |
| cg01519094 | chr11 | North Shore | 0.390305073 | 0.092240322 | -0.298065 | 2.29E-06 |
| cg26738987 | chr11 | South Shore | 0.45426229  | 0.157309143 | -0.296953 | 0.019524 |
| cg15306794 | chr11 | Open Sea    | 0.806595998 | 0.513273861 | -0.293322 | 0.002392 |
| cg19320476 | chr11 | Island      | 0.337709137 | 0.046152605 | -0.291557 | 0.000108 |
| cg13806741 | chr11 | Island      | 0.588935198 | 0.298749176 | -0.290186 | 0.032127 |
| cg11420761 | chr11 | Open Sea    | 0.447111215 | 0.157145431 | -0.289966 | 7.01E-05 |
| cg18974921 | chr11 | South Shelf | 0.410056831 | 0.120500983 | -0.289556 | 0.000616 |
| cg09607276 | chr11 | Island      | 0.3291954   | 0.042395048 | -0.2868   | 1.22E-05 |
| cg06710328 | chr11 | Open Sea    | 0.634613338 | 0.352242197 | -0.282371 | 3.64E-05 |
| cg07721852 | chr11 | Open Sea    | 0.354905457 | 0.074038723 | -0.280867 | 2.86E-07 |
| cg17566541 | chr11 | Open Sea    | 0.650105033 | 0.375669606 | -0.274435 | 0.027327 |
| cg02940147 | chr11 | South Shore | 0.573100688 | 0.299298074 | -0.273803 | 0.001016 |
| cg05382956 | chr11 | Open Sea    | 0.347380552 | 0.073657544 | -0.273723 | 1.85E-05 |
| cg27142536 | chr11 | Island      | 0.367622516 | 0.096741516 | -0.270881 | 5.74E-05 |
| cg21992250 | chr11 | Island      | 0.475171571 | 0.206704616 | -0.268467 | 0.036642 |
| cg26489413 | chr11 | Open Sea    | 0.470012991 | 0.202631224 | -0.267382 | 0.026615 |
| cg10313947 | chr11 | Open Sea    | 0.472567841 | 0.205703573 | -0.266864 | 2.04E-05 |
| cg13077745 | chr11 | South Shelf | 0.575084015 | 0.308794782 | -0.266289 | 3.94E-05 |
| cg10575846 | chr11 | South Shelf | 0.931948765 | 0.667048861 | -0.2649   | 0.002947 |
| cg23600701 | chr11 | North Shore | 0.425349855 | 0.161571797 | -0.263778 | 0.044258 |
| cg24953078 | chr11 | Open Sea    | 0.434098131 | 0.171930586 | -0.262168 | 0.010906 |
| cg25909064 | chr11 | South Shore | 0.703237233 | 0.442730175 | -0.260507 | 0.02664  |
| cg27092752 | chr11 | Island      | 0.297795409 | 0.037357102 | -0.260438 | 0.000138 |

|            |       |             |             |             |           |          |
|------------|-------|-------------|-------------|-------------|-----------|----------|
| cg12940747 | chr11 | Open Sea    | 0.318054198 | 0.057669826 | -0.260384 | 8.61E-05 |
| cg15887459 | chr11 | Island      | 0.555123921 | 0.295558625 | -0.259565 | 0.000188 |
| cg03826976 | chr11 | Island      | 0.412041618 | 0.153293953 | -0.258748 | 0.000393 |
| cg07977202 | chr11 | North Shore | 0.641857613 | 0.383376119 | -0.258481 | 0.020684 |
| cg20621200 | chr11 | Island      | 0.364944299 | 0.106935058 | -0.258009 | 1.94E-05 |
| cg07121644 | chr11 | Open Sea    | 0.474031618 | 0.21691741  | -0.257114 | 0.049951 |
| cg02780017 | chr11 | Open Sea    | 0.51438792  | 0.25812709  | -0.256261 | 0.044373 |
| cg17526229 | chr11 | Island      | 0.403084155 | 0.147754349 | -0.25533  | 0.000657 |
| cg07345999 | chr11 | Island      | 0.622168918 | 0.368684999 | -0.253484 | 0.041006 |
| cg11886358 | chr11 | North Shore | 0.81093138  | 0.558450123 | -0.252481 | 0.000668 |
| cg09242181 | chr11 | South Shore | 0.352754879 | 0.100337019 | -0.252418 | 0.001494 |
| cg14547895 | chr11 | South Shore | 0.503592157 | 0.254075096 | -0.249517 | 0.003265 |
| cg16404106 | chr11 | North Shore | 0.36243788  | 0.115096465 | -0.247341 | 0.045265 |
| cg26335578 | chr11 | Open Sea    | 0.593247693 | 0.346889923 | -0.246358 | 3.61E-08 |
| cg15243034 | chr11 | Island      | 0.604523871 | 0.360223194 | -0.244301 | 0.005677 |
| cg19505827 | chr11 | Open Sea    | 0.284116131 | 0.040839694 | -0.243276 | 1.37E-06 |
| cg12536891 | chr11 | Open Sea    | 0.565462068 | 0.322823394 | -0.242639 | 0.006464 |
| cg13055001 | chr11 | South Shore | 0.296378582 | 0.054431264 | -0.241947 | 8.38E-06 |
| cg13505393 | chr11 | North Shelf | 0.416891885 | 0.175587737 | -0.241304 | 0.020545 |
| cg21080921 | chr11 | Open Sea    | 0.354862537 | 0.114193097 | -0.240669 | 0.000146 |
| cg07934552 | chr11 | Island      | 0.570344463 | 0.329781555 | -0.240563 | 0.000564 |
| cg06699519 | chr11 | Island      | 0.311459123 | 0.071748364 | -0.239711 | 0.000286 |
| cg03565674 | chr11 | Open Sea    | 0.792014602 | 0.552599147 | -0.239415 | 0.007117 |
| cg15594471 | chr11 | Island      | 0.335556    | 0.096784344 | -0.238772 | 0.008276 |
| cg07805777 | chr11 | Island      | 0.398760922 | 0.160631905 | -0.238129 | 0.024996 |
| cg25251204 | chr11 | Island      | 0.392379567 | 0.155203512 | -0.237176 | 0.004034 |
| cg23817893 | chr11 | Island      | 0.326150602 | 0.091801217 | -0.234349 | 0.000427 |
| cg20471017 | chr11 | Open Sea    | 0.532596565 | 0.29837334  | -0.234223 | 0.003246 |
| cg13234062 | chr11 | South Shore | 0.337930016 | 0.105185114 | -0.232745 | 0.000412 |
| cg01314044 | chr11 | South Shore | 0.324540674 | 0.092424031 | -0.232117 | 0.000464 |
| cg17058475 | chr11 | North Shore | 0.297174129 | 0.065087481 | -0.232087 | 0.000724 |
| cg17542408 | chr11 | Island      | 0.370254535 | 0.138686463 | -0.231568 | 0.019018 |
| cg04142864 | chr11 | Island      | 0.27671243  | 0.046689333 | -0.230023 | 0.004091 |
| cg00005619 | chr11 | North Shelf | 0.839321577 | 0.611973173 | -0.227348 | 0.017136 |
| cg10838469 | chr11 | Open Sea    | 0.742842293 | 0.515616784 | -0.227226 | 0.030859 |
| cg16763885 | chr11 | Open Sea    | 0.313467516 | 0.087544475 | -0.225923 | 0.000413 |
| cg03238359 | chr11 | South Shelf | 0.293872713 | 0.068675927 | -0.225197 | 0.000387 |
| cg07220293 | chr11 | Open Sea    | 0.31708518  | 0.09194859  | -0.225137 | 0.000856 |
| cg07710883 | chr11 | Island      | 0.739250887 | 0.514172194 | -0.225079 | 0.041202 |
| cg18121003 | chr11 | Island      | 0.311093605 | 0.086353098 | -0.224741 | 0.003124 |
| cg01599099 | chr11 | Open Sea    | 0.745538628 | 0.521307004 | -0.224232 | 0.024573 |
| cg15842276 | chr11 | North Shore | 0.386002813 | 0.164320923 | -0.221682 | 0.018669 |
| cg00472277 | chr11 | Open Sea    | 0.321460152 | 0.100415074 | -0.221045 | 0.004052 |
| cg22096687 | chr11 | South Shore | 0.330758966 | 0.111121643 | -0.219637 | 0.001582 |
| cg02928699 | chr11 | Island      | 0.337017129 | 0.117971948 | -0.219045 | 0.01931  |
| cg15992347 | chr11 | North Shore | 0.301772756 | 0.08408683  | -0.217686 | 0.027171 |
| cg27431671 | chr11 | Open Sea    | 0.740764702 | 0.523971877 | -0.216793 | 0.00106  |
| cg22224704 | chr11 | South Shore | 0.358480765 | 0.141950091 | -0.216531 | 0.021866 |
| cg03155301 | chr11 | Open Sea    | 0.72387416  | 0.507802383 | -0.216072 | 0.042212 |
| cg01097384 | chr11 | Island      | 0.343684484 | 0.128206226 | -0.215478 | 4.12E-05 |

|            |       |             |             |             |           |          |
|------------|-------|-------------|-------------|-------------|-----------|----------|
| cg24126592 | chr11 | Island      | 0.267726933 | 0.052293476 | -0.215433 | 4.71E-05 |
| cg23240927 | chr11 | South Shelf | 0.321538157 | 0.107344711 | -0.214193 | 0.011474 |
| cg04069951 | chr11 | Island      | 0.366913808 | 0.153824166 | -0.21309  | 0.00145  |
| cg21083175 | chr11 | North Shore | 0.793770101 | 0.581341461 | -0.212429 | 7.21E-05 |
| cg18152523 | chr11 | North Shore | 0.304437011 | 0.092094367 | -0.212343 | 0.002111 |
| cg21544931 | chr11 | Open Sea    | 0.344247876 | 0.134563997 | -0.209684 | 0.005257 |
| cg26827247 | chr11 | North Shore | 0.309113649 | 0.09945358  | -0.20966  | 0.005658 |
| cg04907084 | chr11 | Open Sea    | 0.71435904  | 0.504786658 | -0.209572 | 0.000386 |
| cg19120389 | chr11 | Open Sea    | 0.412973478 | 0.204067998 | -0.208905 | 0.018532 |
| cg25787499 | chr11 | North Shore | 0.28120427  | 0.072503232 | -0.208701 | 0.003313 |
| cg15622352 | chr11 | Open Sea    | 0.706783527 | 0.500595777 | -0.206188 | 1.25E-05 |
| cg22910449 | chr11 | Island      | 0.346061042 | 0.140683944 | -0.205377 | 0.002046 |
| cg10395685 | chr11 | Island      | 0.240016427 | 0.034895256 | -0.205121 | 0.001619 |
| cg08843492 | chr11 | North Shelf | 0.326340333 | 0.121455761 | -0.204885 | 1.2E-05  |
| cg22166739 | chr11 | South Shore | 0.277079078 | 0.073703473 | -0.203376 | 0.014879 |
| cg25948980 | chr11 | North Shore | 0.255521392 | 0.052338277 | -0.203183 | 0.000606 |
| cg05989862 | chr11 | South Shore | 0.327125717 | 0.125200666 | -0.201925 | 0.041823 |
| cg20406267 | chr11 | North Shore | 0.276973938 | 0.076800371 | -0.200174 | 2.82E-05 |
| cg20181887 | chr12 | North Shore | 0.722074113 | 0.161152661 | -0.560921 | 0.01065  |
| cg26416887 | chr12 | Open Sea    | 0.58648471  | 0.089136135 | -0.497349 | 2.46E-05 |
| cg19897003 | chr12 | Island      | 0.536307739 | 0.047843497 | -0.488464 | 2.27E-09 |
| cg20166714 | chr12 | Island      | 0.542808401 | 0.063831294 | -0.478977 | 8.96E-10 |
| cg11265839 | chr12 | South Shelf | 0.687556214 | 0.216454163 | -0.471102 | 6.76E-08 |
| cg17322044 | chr12 | Open Sea    | 0.642194735 | 0.176638237 | -0.465556 | 0.040083 |
| cg03669590 | chr12 | Island      | 0.514006779 | 0.053791    | -0.460216 | 3.06E-09 |
| cg27127017 | chr12 | Island      | 0.469627461 | 0.037753323 | -0.431874 | 6.12E-10 |
| cg24834394 | chr12 | Open Sea    | 0.568638321 | 0.137594257 | -0.431044 | 0.02207  |
| cg09002919 | chr12 | Open Sea    | 0.608669538 | 0.180936648 | -0.427733 | 9.05E-06 |
| cg11050793 | chr12 | South Shelf | 0.628728626 | 0.207123725 | -0.421605 | 0.012259 |
| cg06647068 | chr12 | South Shore | 0.56229726  | 0.154293572 | -0.408004 | 9.07E-06 |
| cg09825309 | chr12 | Open Sea    | 0.474363985 | 0.07370691  | -0.400657 | 5E-08    |
| cg18705931 | chr12 | Island      | 0.596051663 | 0.198107275 | -0.397944 | 0.00021  |
| cg13581015 | chr12 | North Shore | 0.570987708 | 0.174026476 | -0.396961 | 0.000272 |
| cg07687131 | chr12 | South Shore | 0.500869412 | 0.109979201 | -0.39089  | 7.36E-06 |
| cg06611426 | chr12 | South Shelf | 0.636022428 | 0.248624069 | -0.387398 | 0.01413  |
| cg16618104 | chr12 | South Shore | 0.460950063 | 0.081788473 | -0.379162 | 2.02E-05 |
| cg25630910 | chr12 | North Shore | 0.410325646 | 0.037538246 | -0.372787 | 8.94E-08 |
| cg00756032 | chr12 | Island      | 0.442820272 | 0.077269779 | -0.36555  | 5.41E-07 |
| cg04947907 | chr12 | Open Sea    | 0.440232046 | 0.077735427 | -0.362497 | 2.72E-06 |
| cg14952949 | chr12 | North Shore | 0.426017314 | 0.069831808 | -0.356186 | 9.53E-05 |
| cg11090202 | chr12 | North Shore | 0.508017898 | 0.153286651 | -0.354731 | 2.33E-07 |
| cg06734406 | chr12 | Island      | 0.51901516  | 0.164339123 | -0.354676 | 0.002097 |
| cg16642299 | chr12 | Open Sea    | 0.449781553 | 0.103491509 | -0.34629  | 3.32E-05 |
| cg12232388 | chr12 | North Shore | 0.494679075 | 0.148461828 | -0.346217 | 0.006049 |
| cg02351381 | chr12 | Open Sea    | 0.491507749 | 0.145890783 | -0.345617 | 0.026475 |
| cg19034038 | chr12 | North Shore | 0.415296815 | 0.070454986 | -0.344842 | 4.3E-06  |
| cg06864895 | chr12 | South Shore | 0.459972484 | 0.117510729 | -0.342462 | 6.29E-05 |
| cg08693490 | chr12 | Open Sea    | 0.439772871 | 0.098532395 | -0.34124  | 0.000626 |
| cg17570948 | chr12 | Island      | 0.695890623 | 0.355998619 | -0.339892 | 0.010428 |
| cg15279308 | chr12 | Island      | 0.459435613 | 0.119852632 | -0.339583 | 0.000674 |

|            |       |             |             |             |           |          |
|------------|-------|-------------|-------------|-------------|-----------|----------|
| cg14844236 | chr12 | North Shore | 0.647865062 | 0.308663075 | -0.339202 | 0.004138 |
| cg14242936 | chr12 | South Shelf | 0.61271434  | 0.274117237 | -0.338597 | 0.006186 |
| cg19697239 | chr12 | Island      | 0.369232326 | 0.037430214 | -0.331802 | 4.94E-06 |
| cg22344727 | chr12 | Island      | 0.391020844 | 0.059626981 | -0.331394 | 1.74E-06 |
| cg03507641 | chr12 | Open Sea    | 0.42488763  | 0.096148143 | -0.328739 | 7.49E-06 |
| cg05361096 | chr12 | Island      | 0.551572031 | 0.227491702 | -0.32408  | 0.01367  |
| cg27188703 | chr12 | Island      | 0.365701575 | 0.042536644 | -0.323165 | 1.17E-05 |
| cg09049251 | chr12 | North Shore | 0.473703218 | 0.150663491 | -0.32304  | 5.84E-07 |
| cg04046364 | chr12 | Open Sea    | 0.566999913 | 0.245463699 | -0.321536 | 0.018471 |
| cg19554257 | chr12 | Open Sea    | 0.519510818 | 0.199205693 | -0.320305 | 0.019456 |
| cg26328335 | chr12 | Island      | 0.462406751 | 0.143367962 | -0.319039 | 0.000391 |
| cg05981335 | chr12 | Island      | 0.419509235 | 0.101292996 | -0.318216 | 6.84E-06 |
| cg08975803 | chr12 | Island      | 0.413612574 | 0.100344893 | -0.313268 | 3.12E-06 |
| cg18810681 | chr12 | Open Sea    | 0.527656363 | 0.214671791 | -0.312985 | 1.03E-05 |
| cg22171539 | chr12 | North Shelf | 0.397158094 | 0.084717751 | -0.31244  | 1.84E-05 |
| cg23702046 | chr12 | Open Sea    | 0.736638015 | 0.425176998 | -0.311461 | 0.001683 |
| cg01918001 | chr12 | Open Sea    | 0.810409957 | 0.499291162 | -0.311119 | 0.002923 |
| cg25136495 | chr12 | Island      | 0.382391315 | 0.073460176 | -0.308931 | 0.013991 |
| cg11220161 | chr12 | South Shore | 0.589316222 | 0.28219625  | -0.30712  | 8.15E-05 |
| cg07161429 | chr12 | Open Sea    | 0.607946979 | 0.304714541 | -0.303232 | 0.020699 |
| cg15959252 | chr12 | South Shore | 0.456817787 | 0.15501713  | -0.301801 | 2.7E-05  |
| cg05581469 | chr12 | South Shore | 0.406962539 | 0.10741553  | -0.299547 | 0.004367 |
| cg26874693 | chr12 | Open Sea    | 0.362219732 | 0.062914425 | -0.299305 | 8.95E-07 |
| cg19872463 | chr12 | North Shore | 0.464763905 | 0.167699094 | -0.297065 | 0.026287 |
| cg09093210 | chr12 | Island      | 0.538317553 | 0.242428576 | -0.295889 | 0.001449 |
| cg27659049 | chr12 | Island      | 0.357346233 | 0.061706075 | -0.29564  | 5.74E-07 |
| cg07967679 | chr12 | Island      | 0.458417653 | 0.164336122 | -0.294082 | 5.46E-05 |
| cg06930722 | chr12 | Open Sea    | 0.422145441 | 0.129783069 | -0.292362 | 0.049849 |
| cg13899814 | chr12 | Island      | 0.863005888 | 0.572822115 | -0.290184 | 0.030185 |
| cg04850731 | chr12 | Island      | 0.569949211 | 0.282372916 | -0.287576 | 0.028782 |
| cg02697094 | chr12 | South Shore | 0.429040886 | 0.142608909 | -0.286432 | 6.62E-05 |
| cg23855989 | chr12 | Island      | 0.429329721 | 0.144032506 | -0.285297 | 0.025549 |
| cg02265721 | chr12 | Open Sea    | 0.642863642 | 0.361065131 | -0.281799 | 0.022905 |
| cg10621809 | chr12 | Open Sea    | 0.703436915 | 0.422371286 | -0.281066 | 0.043674 |
| cg02695343 | chr12 | North Shore | 0.472379264 | 0.192195038 | -0.280184 | 0.029322 |
| cg25898092 | chr12 | South Shore | 0.365567399 | 0.085417645 | -0.28015  | 7.79E-06 |
| cg24637035 | chr12 | Open Sea    | 0.537594383 | 0.260025959 | -0.277568 | 8.55E-05 |
| cg02585702 | chr12 | North Shore | 0.36444637  | 0.08691371  | -0.277533 | 0.000761 |
| cg17173975 | chr12 | Open Sea    | 0.426279736 | 0.148822113 | -0.277458 | 0.001605 |
| cg18948199 | chr12 | Open Sea    | 0.44038837  | 0.163160101 | -0.277228 | 0.01222  |
| cg10253371 | chr12 | South Shore | 0.346833687 | 0.069875432 | -0.276958 | 0.000833 |
| cg19601035 | chr12 | North Shore | 0.353959576 | 0.079219073 | -0.274741 | 0.000264 |
| cg04381888 | chr12 | Open Sea    | 0.541021851 | 0.266807019 | -0.274215 | 0.000229 |
| cg03078269 | chr12 | Island      | 0.333393047 | 0.060879345 | -0.272514 | 4.47E-05 |
| cg24274665 | chr12 | North Shore | 0.333388443 | 0.061442501 | -0.271946 | 7.54E-05 |
| cg05835276 | chr12 | Island      | 0.437340721 | 0.165716354 | -0.271624 | 1.86E-05 |
| cg10052368 | chr12 | North Shelf | 0.771198101 | 0.499731075 | -0.271467 | 0.027736 |
| cg06960461 | chr12 | Open Sea    | 0.399867318 | 0.128432229 | -0.271435 | 0.036748 |
| cg04678315 | chr12 | Open Sea    | 0.377391931 | 0.106818154 | -0.270574 | 1.14E-05 |
| cg14802312 | chr12 | South Shelf | 0.499799123 | 0.232570955 | -0.267228 | 0.041014 |

|            |       |             |             |             |           |          |
|------------|-------|-------------|-------------|-------------|-----------|----------|
| cg06022607 | chr12 | North Shore | 0.728359937 | 0.461942282 | -0.266418 | 0.000111 |
| cg07914866 | chr12 | South Shore | 0.324067677 | 0.059550751 | -0.264517 | 0.001755 |
| cg09365924 | chr12 | North Shelf | 0.647533079 | 0.384905151 | -0.262628 | 0.001068 |
| cg06646494 | chr12 | Island      | 0.852457105 | 0.590530297 | -0.261927 | 0.045786 |
| cg14029489 | chr12 | Island      | 0.314704313 | 0.053672613 | -0.261032 | 0.000551 |
| cg19685491 | chr12 | Island      | 0.569921953 | 0.309655446 | -0.260267 | 0.001738 |
| cg14067873 | chr12 | North Shore | 0.379282234 | 0.119691162 | -0.259591 | 0.000205 |
| cg19894262 | chr12 | Open Sea    | 0.851502163 | 0.592654164 | -0.258848 | 0.021415 |
| cg10500147 | chr12 | North Shore | 0.326490302 | 0.06773916  | -0.258751 | 0.000137 |
| cg16063162 | chr12 | Open Sea    | 0.657339258 | 0.39997196  | -0.257367 | 7.28E-05 |
| cg03310242 | chr12 | Island      | 0.332913864 | 0.076765545 | -0.256148 | 0.000184 |
| cg09481537 | chr12 | Open Sea    | 0.821490324 | 0.565561493 | -0.255929 | 0.000416 |
| cg01335367 | chr12 | Open Sea    | 0.361520364 | 0.106056226 | -0.255464 | 0.000651 |
| cg23340214 | chr12 | North Shore | 0.527690793 | 0.272851347 | -0.254839 | 0.019217 |
| cg17181255 | chr12 | North Shore | 0.896105329 | 0.644215403 | -0.25189  | 0.002224 |
| cg08886711 | chr12 | Island      | 0.473188835 | 0.221595088 | -0.251594 | 3.17E-06 |
| cg19374752 | chr12 | South Shelf | 0.618037267 | 0.366554119 | -0.251483 | 1.85E-07 |
| cg07067993 | chr12 | Open Sea    | 0.35993411  | 0.108887016 | -0.251047 | 0.000749 |
| cg17964844 | chr12 | North Shelf | 0.414049923 | 0.164580947 | -0.249469 | 0.018993 |
| cg18320356 | chr12 | Open Sea    | 0.517162491 | 0.268129262 | -0.249033 | 0.000338 |
| cg06970510 | chr12 | Island      | 0.305571964 | 0.057078322 | -0.248494 | 0.000969 |
| cg13512987 | chr12 | Open Sea    | 0.464079821 | 0.216516694 | -0.247563 | 0.004947 |
| cg11957400 | chr12 | North Shore | 0.385840439 | 0.13831767  | -0.247523 | 0.000458 |
| cg04844574 | chr12 | Open Sea    | 0.317753492 | 0.070826546 | -0.246927 | 0.000468 |
| cg08711175 | chr12 | South Shelf | 0.451985075 | 0.205083465 | -0.246902 | 0.022848 |
| cg01614102 | chr12 | North Shore | 0.333912201 | 0.091526433 | -0.242386 | 0.001282 |
| cg00723994 | chr12 | Island      | 0.321327221 | 0.079584549 | -0.241743 | 0.019451 |
| cg16739441 | chr12 | Open Sea    | 0.337825623 | 0.096339709 | -0.241486 | 0.00012  |
| cg07007400 | chr12 | Island      | 0.374116897 | 0.132934867 | -0.241182 | 7.87E-05 |
| cg22566355 | chr12 | Island      | 0.591922022 | 0.354114689 | -0.237807 | 4.32E-06 |
| cg16115588 | chr12 | Island      | 0.273670202 | 0.036513501 | -0.237157 | 4.87E-05 |
| cg02042936 | chr12 | North Shelf | 0.747690167 | 0.511180336 | -0.23651  | 0.033142 |
| cg12894524 | chr12 | Open Sea    | 0.319225933 | 0.08326268  | -0.235963 | 0.004362 |
| cg04717595 | chr12 | Open Sea    | 0.703925654 | 0.468838741 | -0.235087 | 0.009881 |
| cg26113809 | chr12 | Island      | 0.35980457  | 0.125195522 | -0.234609 | 0.000331 |
| cg21614690 | chr12 | North Shore | 0.66299916  | 0.428513714 | -0.234485 | 0.014104 |
| cg26396455 | chr12 | Island      | 0.403314023 | 0.169459296 | -0.233855 | 0.000961 |
| cg19156231 | chr12 | Island      | 0.277054041 | 0.043634931 | -0.233419 | 0.000268 |
| cg09657354 | chr12 | Open Sea    | 0.33836694  | 0.105102139 | -0.233265 | 0.000603 |
| cg16848712 | chr12 | South Shore | 0.396954256 | 0.163960566 | -0.232994 | 0.004649 |
| cg20454518 | chr12 | Island      | 0.620472195 | 0.388505363 | -0.231967 | 0.018709 |
| cg19690403 | chr12 | Open Sea    | 0.420911279 | 0.18943627  | -0.231475 | 0.008174 |
| cg01682504 | chr12 | South Shore | 0.334852015 | 0.104936882 | -0.229915 | 0.002965 |
| cg19796532 | chr12 | Island      | 0.30209365  | 0.072491231 | -0.229602 | 6.49E-05 |
| cg01295392 | chr12 | Island      | 0.345202967 | 0.116191095 | -0.229012 | 0.022734 |
| cg20343832 | chr12 | Island      | 0.304104564 | 0.075323838 | -0.228781 | 0.000305 |
| cg13952159 | chr12 | Open Sea    | 0.380764455 | 0.153452469 | -0.227312 | 0.001041 |
| cg03999434 | chr12 | Island      | 0.300914142 | 0.073824882 | -0.227089 | 0.006889 |
| cg15644756 | chr12 | North Shelf | 0.883108692 | 0.656999398 | -0.226109 | 0.00097  |
| cg25313172 | chr12 | Island      | 0.322685774 | 0.097892476 | -0.224793 | 0.034796 |

|            |       |             |             |             |           |          |
|------------|-------|-------------|-------------|-------------|-----------|----------|
| cg08412215 | chr12 | South Shelf | 0.861764946 | 0.637120633 | -0.224644 | 0.01574  |
| cg10695105 | chr12 | Island      | 0.31247506  | 0.089267544 | -0.223208 | 8.52E-06 |
| cg08339023 | chr12 | South Shelf | 0.455111536 | 0.231928444 | -0.223183 | 0.000853 |
| cg08872738 | chr12 | Open Sea    | 0.276205574 | 0.053788499 | -0.222417 | 0.000263 |
| cg05222995 | chr12 | Island      | 0.339468259 | 0.11722369  | -0.222245 | 0.003855 |
| cg08527797 | chr12 | Open Sea    | 0.367687653 | 0.14551924  | -0.222168 | 0.015664 |
| cg25451893 | chr12 | Island      | 0.285106801 | 0.063408838 | -0.221698 | 0.003218 |
| cg14537533 | chr12 | Island      | 0.279626171 | 0.058418884 | -0.221207 | 0.000411 |
| cg19355069 | chr12 | Island      | 0.583543295 | 0.362370104 | -0.221173 | 0.015606 |
| cg04611395 | chr12 | Island      | 0.291148396 | 0.070104979 | -0.221043 | 0.001211 |
| cg09082441 | chr12 | South Shelf | 0.262158563 | 0.041410098 | -0.220748 | 0.000244 |
| cg11841771 | chr12 | North Shore | 0.273572456 | 0.052906571 | -0.220666 | 8.27E-05 |
| cg19856499 | chr12 | Island      | 0.317720331 | 0.097416989 | -0.220303 | 0.020027 |
| cg26809635 | chr12 | Island      | 0.278814877 | 0.059658163 | -0.219157 | 0.000541 |
| cg25625162 | chr12 | Open Sea    | 0.331856096 | 0.112763295 | -0.219093 | 0.001248 |
| cg02019508 | chr12 | Open Sea    | 0.762674517 | 0.543948578 | -0.218726 | 1.64E-06 |
| cg08748969 | chr12 | South Shore | 0.633182642 | 0.414520374 | -0.218662 | 0.006832 |
| cg22635491 | chr12 | Island      | 0.476590893 | 0.258318593 | -0.218272 | 0.005139 |
| cg07528595 | chr12 | South Shore | 0.61759356  | 0.400331571 | -0.217262 | 0.001791 |
| cg15712226 | chr12 | Island      | 0.48810389  | 0.271074559 | -0.217029 | 0.016127 |
| cg03408433 | chr12 | Open Sea    | 0.316375622 | 0.099797911 | -0.216578 | 0.002269 |
| cg18949192 | chr12 | North Shore | 0.296196839 | 0.079845599 | -0.216351 | 0.001108 |
| cg02468320 | chr12 | Open Sea    | 0.465079389 | 0.249559901 | -0.215519 | 0.036582 |
| cg08110272 | chr12 | Open Sea    | 0.277803348 | 0.062523961 | -0.215279 | 7.46E-05 |
| cg05860723 | chr12 | Island      | 0.298667593 | 0.083868463 | -0.214799 | 0.000244 |
| cg03213374 | chr12 | Open Sea    | 0.363103021 | 0.148446787 | -0.214656 | 0.046201 |
| cg23031493 | chr12 | Island      | 0.312808849 | 0.098811832 | -0.213997 | 0.035978 |
| cg16945186 | chr12 | Island      | 0.252930674 | 0.039262235 | -0.213668 | 3.08E-05 |
| cg15405572 | chr12 | Open Sea    | 0.287968511 | 0.075135741 | -0.212833 | 0.000137 |
| cg02566627 | chr12 | Open Sea    | 0.404496076 | 0.19281319  | -0.211683 | 0.01161  |
| cg22229906 | chr12 | North Shore | 0.288824436 | 0.078436833 | -0.210388 | 0.000147 |
| cg05298628 | chr12 | North Shore | 0.315958605 | 0.10726561  | -0.208693 | 0.011315 |
| cg22813430 | chr12 | North Shore | 0.486037057 | 0.277716063 | -0.208321 | 0.008444 |
| cg26711820 | chr12 | North Shore | 0.530548686 | 0.322320799 | -0.208228 | 0.000784 |
| cg05142520 | chr12 | Island      | 0.492295779 | 0.284173519 | -0.208122 | 0.049071 |
| cg14239655 | chr12 | Open Sea    | 0.324519175 | 0.11796792  | -0.206551 | 0.017881 |
| cg24333145 | chr12 | North Shore | 0.821679526 | 0.615439278 | -0.20624  | 4.06E-09 |
| cg09577511 | chr12 | Island      | 0.393526481 | 0.187535047 | -0.205991 | 0.004754 |
| cg14846292 | chr12 | North Shore | 0.730377004 | 0.524389849 | -0.205987 | 0.002725 |
| cg11412853 | chr12 | North Shore | 0.303614596 | 0.09789787  | -0.205717 | 0.00281  |
| cg05694021 | chr12 | Open Sea    | 0.32536231  | 0.119701948 | -0.20566  | 0.03231  |
| cg12883767 | chr12 | North Shore | 0.715325766 | 0.509822319 | -0.205503 | 3.71E-05 |
| cg01494454 | chr12 | North Shore | 0.270861553 | 0.065434618 | -0.205427 | 0.000133 |
| cg03728296 | chr12 | Island      | 0.327983488 | 0.122759968 | -0.205224 | 0.001974 |
| cg06654103 | chr12 | South Shore | 0.907273253 | 0.702165444 | -0.205108 | 0.016118 |
| cg23754320 | chr12 | North Shore | 0.253819346 | 0.048899469 | -0.20492  | 0.000166 |
| cg01305421 | chr12 | Open Sea    | 0.295934115 | 0.091159965 | -0.204774 | 0.000139 |
| cg13022977 | chr12 | South Shore | 0.366137331 | 0.162216437 | -0.203921 | 0.041475 |
| cg11569159 | chr12 | North Shore | 0.322940525 | 0.119072191 | -0.203868 | 0.010091 |
| cg09670128 | chr12 | Island      | 0.274237392 | 0.070710989 | -0.203526 | 0.00548  |

|            |       |             |             |             |           |          |
|------------|-------|-------------|-------------|-------------|-----------|----------|
| cg12670347 | chr12 | Island      | 0.351652521 | 0.149512693 | -0.20214  | 0.000115 |
| cg06645921 | chr12 | Island      | 0.294670801 | 0.093568069 | -0.201103 | 0.000404 |
| cg06444781 | chr12 | Island      | 0.833576478 | 0.632573134 | -0.201003 | 0.005911 |
| cg15074032 | chr12 | Open Sea    | 0.803370126 | 0.602481581 | -0.200889 | 0.000193 |
| cg18193127 | chr12 | Open Sea    | 0.835105576 | 0.634327388 | -0.200778 | 0.001488 |
| cg00292513 | chr12 | Island      | 0.342862297 | 0.142217948 | -0.200644 | 0.003252 |
| cg10906284 | chr12 | Island      | 0.286670463 | 0.08639774  | -0.200273 | 0.01028  |
| cg16896868 | chr13 | Open Sea    | 0.641887714 | 0.186809648 | -0.455078 | 0.039977 |
| cg15975806 | chr13 | Open Sea    | 0.662749127 | 0.208780551 | -0.453969 | 0.044057 |
| cg06048436 | chr13 | Open Sea    | 0.565921719 | 0.131721907 | -0.4342   | 2.81E-05 |
| cg16131748 | chr13 | Open Sea    | 0.537129254 | 0.109036845 | -0.428092 | 0.002111 |
| cg19023589 | chr13 | North Shelf | 0.868786913 | 0.453130442 | -0.415656 | 0.016485 |
| cg24453118 | chr13 | Open Sea    | 0.550716539 | 0.135080261 | -0.415636 | 0.003404 |
| cg03697308 | chr13 | South Shore | 0.580070985 | 0.174062257 | -0.406009 | 0.018904 |
| cg00806704 | chr13 | North Shore | 0.543771085 | 0.169465321 | -0.374306 | 1.84E-06 |
| cg09942546 | chr13 | North Shore | 0.513279818 | 0.143876736 | -0.369403 | 5.77E-05 |
| cg12650565 | chr13 | Open Sea    | 0.726798664 | 0.371957828 | -0.354841 | 0.001542 |
| cg08962087 | chr13 | Island      | 0.376408997 | 0.030010909 | -0.346398 | 3.6E-07  |
| cg14909464 | chr13 | South Shore | 0.400757153 | 0.055559188 | -0.345198 | 6.05E-08 |
| cg05222982 | chr13 | South Shore | 0.451451461 | 0.109826209 | -0.341625 | 0.000331 |
| cg10766030 | chr13 | Open Sea    | 0.717079606 | 0.411270519 | -0.305809 | 0.001508 |
| cg21222888 | chr13 | Open Sea    | 0.7579087   | 0.452444349 | -0.305464 | 0.000356 |
| cg09781827 | chr13 | North Shore | 0.413828541 | 0.110648275 | -0.30318  | 4.25E-05 |
| cg25658983 | chr13 | Open Sea    | 0.501213814 | 0.199256932 | -0.301957 | 0.033995 |
| cg06779705 | chr13 | South Shore | 0.629927519 | 0.330194679 | -0.299733 | 1.17E-05 |
| cg10668926 | chr13 | North Shore | 0.474436446 | 0.178000295 | -0.296436 | 1.01E-06 |
| cg25032595 | chr13 | Island      | 0.334565128 | 0.040090875 | -0.294474 | 6.23E-05 |
| cg26667946 | chr13 | Open Sea    | 0.395933771 | 0.105821376 | -0.290112 | 0.003013 |
| cg11570656 | chr13 | North Shore | 0.522539392 | 0.241998039 | -0.280541 | 2.11E-06 |
| cg25221774 | chr13 | Open Sea    | 0.797240243 | 0.518312266 | -0.278928 | 0.008084 |
| cg07165066 | chr13 | South Shelf | 0.348437198 | 0.071543859 | -0.276893 | 9.55E-06 |
| cg06137852 | chr13 | South Shore | 0.359203982 | 0.083719716 | -0.275484 | 4.48E-05 |
| cg07911080 | chr13 | North Shore | 0.364652997 | 0.08953055  | -0.275122 | 0.004271 |
| cg10141008 | chr13 | Open Sea    | 0.342025589 | 0.068405328 | -0.27362  | 3.38E-05 |
| cg14269973 | chr13 | Open Sea    | 0.334417447 | 0.062214927 | -0.272203 | 7.08E-06 |
| cg22900415 | chr13 | Island      | 0.336542401 | 0.073340363 | -0.263202 | 7.37E-05 |
| cg10791035 | chr13 | North Shore | 0.591759006 | 0.333046682 | -0.258712 | 0.000877 |
| cg11283429 | chr13 | North Shore | 0.379705377 | 0.121728131 | -0.257977 | 0.008783 |
| cg16705627 | chr13 | Island      | 0.357618312 | 0.10164292  | -0.255975 | 0.000738 |
| cg04895345 | chr13 | Open Sea    | 0.338651872 | 0.08304965  | -0.255602 | 0.001208 |
| cg06787317 | chr13 | Open Sea    | 0.704114735 | 0.450054506 | -0.25406  | 0.002098 |
| cg14427009 | chr13 | Island      | 0.399156687 | 0.1455845   | -0.253572 | 0.003785 |
| cg11077516 | chr13 | Island      | 0.384110253 | 0.131955132 | -0.252155 | 0.001132 |
| cg23169588 | chr13 | North Shelf | 0.847616086 | 0.60036948  | -0.247247 | 0.004802 |
| cg11563844 | chr13 | Open Sea    | 0.307647366 | 0.063712144 | -0.243935 | 0.000138 |
| cg12053155 | chr13 | Island      | 0.296188581 | 0.061755245 | -0.234433 | 0.00078  |
| cg23024102 | chr13 | North Shore | 0.599337958 | 0.365718987 | -0.233619 | 0.016564 |
| cg02055963 | chr13 | Island      | 0.296030034 | 0.064286406 | -0.231744 | 0.000257 |
| cg13031171 | chr13 | Island      | 0.282800045 | 0.055707533 | -0.227093 | 0.00022  |
| cg01499197 | chr13 | Island      | 0.326124233 | 0.099673189 | -0.226451 | 0.001123 |

|            |       |             |             |             |           |          |
|------------|-------|-------------|-------------|-------------|-----------|----------|
| cg20884298 | chr13 | Open Sea    | 0.319608093 | 0.095770466 | -0.223838 | 2.87E-05 |
| cg21091841 | chr13 | Open Sea    | 0.401700674 | 0.179764838 | -0.221936 | 8.32E-05 |
| cg20602244 | chr13 | South Shore | 0.828501744 | 0.607004139 | -0.221498 | 0.003858 |
| cg23558002 | chr13 | North Shore | 0.282388124 | 0.065127098 | -0.217261 | 0.000636 |
| cg05600717 | chr13 | South Shore | 0.339288561 | 0.123467225 | -0.215821 | 0.00271  |
| cg05967403 | chr13 | Island      | 0.353513855 | 0.137817946 | -0.215696 | 0.014418 |
| cg08348990 | chr13 | Open Sea    | 0.658686497 | 0.443214674 | -0.215472 | 0.000213 |
| cg02017534 | chr13 | Open Sea    | 0.291712315 | 0.077281851 | -0.21443  | 0.001108 |
| cg01504447 | chr13 | Open Sea    | 0.33300892  | 0.120390232 | -0.212619 | 4.38E-05 |
| cg07268021 | chr13 | Island      | 0.690818259 | 0.480181214 | -0.210637 | 0.023249 |
| cg06001519 | chr13 | Island      | 0.288620833 | 0.079559196 | -0.209062 | 0.014233 |
| cg26446593 | chr13 | South Shore | 0.818006183 | 0.610000641 | -0.208006 | 0.033015 |
| cg21801165 | chr13 | Open Sea    | 0.518050712 | 0.311384278 | -0.206666 | 0.018139 |
| cg06259025 | chr13 | Island      | 0.296129398 | 0.090534563 | -0.205595 | 0.002897 |
| cg26444528 | chr13 | Island      | 0.290639945 | 0.087272746 | -0.203367 | 0.006547 |
| cg02057782 | chr13 | North Shore | 0.462984027 | 0.260051527 | -0.202932 | 0.016605 |
| cg25702335 | chr13 | South Shore | 0.283140154 | 0.081496108 | -0.201644 | 0.000943 |
| cg06215457 | chr13 | Open Sea    | 0.233356226 | 0.031948434 | -0.201408 | 8.59E-05 |
| cg09636214 | chr14 | Island      | 0.633117903 | 0.080828398 | -0.55229  | 2.04E-08 |
| cg23511824 | chr14 | Open Sea    | 0.640973377 | 0.164733902 | -0.476239 | 0.022981 |
| cg05926722 | chr14 | Island      | 0.623725917 | 0.151565513 | -0.47216  | 0.023197 |
| cg06834875 | chr14 | Island      | 0.582980785 | 0.128103302 | -0.454877 | 0.001316 |
| cg26407316 | chr14 | Open Sea    | 0.747435202 | 0.311031837 | -0.436403 | 0.044177 |
| cg12922751 | chr14 | North Shore | 0.565939127 | 0.137922235 | -0.428017 | 0.008818 |
| cg00808648 | chr14 | North Shore | 0.596134495 | 0.192280253 | -0.403854 | 0.018129 |
| cg24169669 | chr14 | Island      | 0.556549288 | 0.158518519 | -0.398031 | 0.001997 |
| cg23289024 | chr14 | South Shore | 0.461369378 | 0.065974545 | -0.395395 | 5.38E-06 |
| cg26094789 | chr14 | Island      | 0.567750559 | 0.191750029 | -0.376001 | 0.001098 |
| cg19725377 | chr14 | Open Sea    | 0.487610181 | 0.113550754 | -0.374059 | 0.005875 |
| cg09317728 | chr14 | Open Sea    | 0.534337308 | 0.173617785 | -0.36072  | 0.009878 |
| cg16597391 | chr14 | Island      | 0.532110729 | 0.173482492 | -0.358628 | 0.00013  |
| cg11152302 | chr14 | North Shore | 0.759627281 | 0.401155557 | -0.358472 | 0.004173 |
| cg14233720 | chr14 | Open Sea    | 0.533981257 | 0.183019772 | -0.350961 | 0.009359 |
| cg12060499 | chr14 | Island      | 0.397343292 | 0.047642678 | -0.349701 | 2.42E-06 |
| cg13716585 | chr14 | Open Sea    | 0.435876129 | 0.088937585 | -0.346939 | 2E-06    |
| cg01554437 | chr14 | Island      | 0.483519351 | 0.143374615 | -0.340145 | 0.045387 |
| cg08130912 | chr14 | Open Sea    | 0.596375182 | 0.256571883 | -0.339803 | 0.036365 |
| cg12978105 | chr14 | Island      | 0.527074032 | 0.188047139 | -0.339027 | 0.009819 |
| cg12200038 | chr14 | Island      | 0.425502062 | 0.091977838 | -0.333524 | 4.35E-05 |
| cg06765217 | chr14 | Island      | 0.375546724 | 0.04428677  | -0.33126  | 1.06E-05 |
| cg16389901 | chr14 | South Shore | 0.460457155 | 0.135878801 | -0.324578 | 0.000664 |
| cg08139247 | chr14 | Island      | 0.420035056 | 0.095590106 | -0.324445 | 4.83E-06 |
| cg21885107 | chr14 | Island      | 0.564456926 | 0.241334759 | -0.323122 | 0.024524 |
| cg18182566 | chr14 | Open Sea    | 0.760539236 | 0.437588975 | -0.32295  | 0.010842 |
| cg13797425 | chr14 | South Shore | 0.410437083 | 0.096972579 | -0.313465 | 1.8E-05  |
| cg27175093 | chr14 | South Shore | 0.364335177 | 0.063576878 | -0.300758 | 3.48E-05 |
| cg20710709 | chr14 | Island      | 0.471622288 | 0.171858626 | -0.299764 | 0.0041   |
| cg09950309 | chr14 | North Shore | 0.374143903 | 0.077942346 | -0.296202 | 2.9E-06  |
| cg01129459 | chr14 | South Shore | 0.395003487 | 0.099294899 | -0.295709 | 0.000146 |
| cg08234878 | chr14 | Open Sea    | 0.401947304 | 0.10811604  | -0.293831 | 0.040164 |

|            |       |             |             |             |           |          |
|------------|-------|-------------|-------------|-------------|-----------|----------|
| cg11787167 | chr14 | South Shelf | 0.370183794 | 0.076430092 | -0.293754 | 6.86E-05 |
| cg20999932 | chr14 | Island      | 0.588449712 | 0.295553934 | -0.292896 | 0.033865 |
| cg00917847 | chr14 | Open Sea    | 0.358068552 | 0.069762283 | -0.288306 | 0.000115 |
| cg25608078 | chr14 | Open Sea    | 0.332667728 | 0.048420291 | -0.284247 | 5.33E-05 |
| cg16207263 | chr14 | Open Sea    | 0.336367514 | 0.054800762 | -0.281567 | 1.63E-05 |
| cg16473141 | chr14 | Island      | 0.469397852 | 0.188618855 | -0.280779 | 1.29E-07 |
| cg07066907 | chr14 | South Shore | 0.556904354 | 0.276435847 | -0.280469 | 0.008603 |
| cg27055366 | chr14 | South Shore | 0.851838252 | 0.571839162 | -0.279999 | 9.53E-08 |
| cg19871940 | chr14 | North Shore | 0.313265653 | 0.033456854 | -0.279809 | 5.01E-06 |
| cg21567958 | chr14 | Open Sea    | 0.806907586 | 0.534909502 | -0.271998 | 0.002755 |
| cg10081469 | chr14 | South Shore | 0.44849092  | 0.179078237 | -0.269413 | 0.01363  |
| cg24673101 | chr14 | Island      | 0.460550523 | 0.19121476  | -0.269336 | 0.045107 |
| cg11033654 | chr14 | North Shore | 0.351036382 | 0.082525731 | -0.268511 | 0.036911 |
| cg18512948 | chr14 | Island      | 0.511128762 | 0.244904442 | -0.266224 | 0.000143 |
| cg22986876 | chr14 | Open Sea    | 0.706889164 | 0.440946975 | -0.265942 | 0.003436 |
| cg06966811 | chr14 | Island      | 0.418434284 | 0.153885721 | -0.264549 | 1.3E-07  |
| cg14987799 | chr14 | Open Sea    | 0.300445157 | 0.040247112 | -0.260198 | 7.51E-07 |
| cg12127149 | chr14 | Open Sea    | 0.633998867 | 0.374159381 | -0.259839 | 0.011542 |
| cg23904247 | chr14 | South Shore | 0.43108026  | 0.171462969 | -0.259617 | 0.006801 |
| cg18422058 | chr14 | Open Sea    | 0.482027251 | 0.222903299 | -0.259124 | 0.000429 |
| cg03515897 | chr14 | North Shore | 0.709907073 | 0.454746269 | -0.255161 | 0.04959  |
| cg23683588 | chr14 | Island      | 0.310017538 | 0.055371493 | -0.254646 | 1.88E-05 |
| cg03502791 | chr14 | South Shore | 0.386437399 | 0.132595628 | -0.253842 | 0.00578  |
| cg00747975 | chr14 | Open Sea    | 0.43490464  | 0.181148589 | -0.253756 | 0.03396  |
| cg01121022 | chr14 | Open Sea    | 0.390286845 | 0.136715503 | -0.253571 | 0.00012  |
| cg13219590 | chr14 | Open Sea    | 0.518987164 | 0.270745689 | -0.248241 | 0.006959 |
| cg23438893 | chr14 | North Shore | 0.303330257 | 0.056080329 | -0.24725  | 0.001175 |
| cg11773456 | chr14 | Open Sea    | 0.75780497  | 0.51060965  | -0.247195 | 0.008677 |
| cg02003183 | chr14 | Open Sea    | 0.549452793 | 0.306765669 | -0.242687 | 5.54E-05 |
| cg08247587 | chr14 | North Shore | 0.327741675 | 0.086229787 | -0.241512 | 0.000773 |
| cg16405432 | chr14 | Open Sea    | 0.410184468 | 0.170277644 | -0.239907 | 0.014691 |
| cg16190266 | chr14 | Island      | 0.278712079 | 0.040280513 | -0.238432 | 0.000303 |
| cg12071775 | chr14 | Open Sea    | 0.607880448 | 0.370077913 | -0.237803 | 9E-06    |
| cg03431846 | chr14 | Island      | 0.295395782 | 0.059212375 | -0.236183 | 1.35E-05 |
| cg18280830 | chr14 | South Shore | 0.49277612  | 0.257351745 | -0.235424 | 0.0024   |
| cg17717124 | chr14 | Island      | 0.330978257 | 0.09698711  | -0.233991 | 0.000649 |
| cg04681600 | chr14 | Island      | 0.347138068 | 0.114745472 | -0.232393 | 0.041353 |
| cg06756919 | chr14 | Island      | 0.368021296 | 0.135805566 | -0.232216 | 0.01492  |
| cg21931419 | chr14 | Island      | 0.410357634 | 0.180675578 | -0.229682 | 0.001616 |
| cg12165758 | chr14 | South Shore | 0.283072497 | 0.055192363 | -0.22788  | 0.000224 |
| cg24036523 | chr14 | North Shore | 0.766056829 | 0.539058204 | -0.226999 | 0.018695 |
| cg20911718 | chr14 | North Shore | 0.81419508  | 0.589859507 | -0.224336 | 0.021676 |
| cg05100282 | chr14 | Island      | 0.324550702 | 0.100918631 | -0.223632 | 0.001031 |
| cg23112188 | chr14 | North Shore | 0.285671099 | 0.064692714 | -0.220978 | 0.001388 |
| cg05406635 | chr14 | Island      | 0.357759823 | 0.138837066 | -0.218923 | 0.000264 |
| cg19989295 | chr14 | Island      | 0.25689103  | 0.040296404 | -0.216595 | 2.42E-06 |
| cg12930714 | chr14 | North Shore | 0.279840645 | 0.063301399 | -0.216539 | 0.00065  |
| cg18556834 | chr14 | Island      | 0.314952898 | 0.098494602 | -0.216458 | 0.01352  |
| cg23683254 | chr14 | Island      | 0.27169919  | 0.055912324 | -0.215787 | 0.001132 |
| cg10013142 | chr14 | South Shore | 0.593897419 | 0.380084494 | -0.213813 | 0.021664 |

|            |       |             |             |             |           |          |
|------------|-------|-------------|-------------|-------------|-----------|----------|
| cg27041049 | chr14 | South Shore | 0.584352108 | 0.370546718 | -0.213805 | 0.010698 |
| cg20096365 | chr14 | Open Sea    | 0.741663892 | 0.528298045 | -0.213366 | 1.16E-05 |
| cg01775802 | chr14 | Open Sea    | 0.393692604 | 0.180604845 | -0.213088 | 0.034025 |
| cg09829636 | chr14 | South Shore | 0.328836519 | 0.118353035 | -0.210483 | 0.011958 |
| cg19610615 | chr14 | North Shore | 0.373595938 | 0.165349968 | -0.208246 | 0.048262 |
| cg04937184 | chr14 | South Shore | 0.538070748 | 0.33102647  | -0.207044 | 0.000161 |
| cg23365739 | chr14 | North Shore | 0.476354694 | 0.270343463 | -0.206011 | 0.007953 |
| cg16204357 | chr14 | North Shore | 0.359187664 | 0.15344177  | -0.205746 | 0.004702 |
| cg12890903 | chr14 | North Shore | 0.269250005 | 0.063839516 | -0.20541  | 0.000103 |
| cg24989962 | chr14 | Island      | 0.266182376 | 0.061146491 | -0.205036 | 0.000199 |
| cg05226518 | chr14 | South Shore | 0.776397819 | 0.571880105 | -0.204518 | 0.015633 |
| cg08120263 | chr14 | North Shore | 0.255538996 | 0.051224745 | -0.204314 | 0.000662 |
| cg13038685 | chr14 | Open Sea    | 0.263870792 | 0.060590379 | -0.20328  | 0.000448 |
| cg18242103 | chr14 | Island      | 0.315286316 | 0.112039117 | -0.203247 | 0.000271 |
| cg13248574 | chr14 | Open Sea    | 0.278625593 | 0.077487651 | -0.201138 | 0.002354 |
| cg26150514 | chr15 | North Shelf | 0.731172942 | 0.161903609 | -0.569269 | 5.71E-14 |
| cg14494620 | chr15 | Island      | 0.667860189 | 0.18278914  | -0.485071 | 0.043256 |
| cg03717836 | chr15 | Open Sea    | 0.619304064 | 0.143796424 | -0.475508 | 3.24E-05 |
| cg01953658 | chr15 | North Shore | 0.555394799 | 0.109195969 | -0.446199 | 3.11E-07 |
| cg00027650 | chr15 | Open Sea    | 0.658637122 | 0.216560871 | -0.442076 | 0.034551 |
| cg04645160 | chr15 | South Shore | 0.770650443 | 0.329853952 | -0.440796 | 0.042958 |
| cg09890891 | chr15 | Island      | 0.699709278 | 0.270480443 | -0.429229 | 0.007749 |
| cg07759162 | chr15 | Open Sea    | 0.721368052 | 0.296912361 | -0.424456 | 5.88E-06 |
| cg05994244 | chr15 | Island      | 0.585900835 | 0.167098651 | -0.418802 | 4.45E-10 |
| cg02329430 | chr15 | North Shelf | 0.705628805 | 0.287354764 | -0.418274 | 5.47E-07 |
| cg16668651 | chr15 | Open Sea    | 0.552914097 | 0.135965051 | -0.416949 | 0.04424  |
| cg16567056 | chr15 | Open Sea    | 0.487166042 | 0.074022596 | -0.413143 | 2.33E-09 |
| cg21406075 | chr15 | South Shore | 0.472859744 | 0.077273047 | -0.395587 | 5.48E-06 |
| cg01218896 | chr15 | South Shore | 0.508903084 | 0.119823544 | -0.38908  | 5.63E-05 |
| cg22958047 | chr15 | North Shore | 0.488081686 | 0.099194428 | -0.388887 | 1.14E-08 |
| cg06727338 | chr15 | Open Sea    | 0.464335539 | 0.077071837 | -0.387264 | 3.61E-06 |
| cg01959123 | chr15 | North Shore | 0.445346747 | 0.061269323 | -0.384077 | 1.97E-06 |
| cg26127778 | chr15 | Island      | 0.561765906 | 0.18246296  | -0.379303 | 2.43E-06 |
| cg06302690 | chr15 | Island      | 0.412460051 | 0.040902087 | -0.371558 | 1.74E-06 |
| cg03051384 | chr15 | Island      | 0.430293021 | 0.064029763 | -0.366263 | 1.79E-06 |
| cg06605053 | chr15 | North Shore | 0.42443532  | 0.06404727  | -0.360388 | 8.93E-07 |
| cg12177851 | chr15 | Open Sea    | 0.607914648 | 0.248779965 | -0.359135 | 0.000346 |
| cg26025891 | chr15 | Open Sea    | 0.429975498 | 0.071489791 | -0.358486 | 3.84E-08 |
| cg15031976 | chr15 | North Shore | 0.429621595 | 0.071952706 | -0.357669 | 3.12E-07 |
| cg04854226 | chr15 | North Shore | 0.561784012 | 0.204379442 | -0.357405 | 2.45E-05 |
| cg19821713 | chr15 | Island      | 0.612933558 | 0.259468523 | -0.353465 | 1.59E-06 |
| cg00152322 | chr15 | Island      | 0.470771632 | 0.120134333 | -0.350637 | 0.003135 |
| cg05501584 | chr15 | North Shore | 0.436442242 | 0.096965764 | -0.339476 | 0.003682 |
| cg10614025 | chr15 | Island      | 0.440578258 | 0.103283472 | -0.337295 | 0.000923 |
| cg22377043 | chr15 | Open Sea    | 0.421104547 | 0.084101024 | -0.337004 | 3.75E-05 |
| cg00143527 | chr15 | North Shore | 0.493855161 | 0.164809177 | -0.329046 | 0.002782 |
| cg02693157 | chr15 | Open Sea    | 0.443323837 | 0.122565059 | -0.320759 | 4.31E-05 |
| cg13474370 | chr15 | South Shore | 0.607915531 | 0.289840447 | -0.318075 | 0.003995 |
| cg27370471 | chr15 | Open Sea    | 0.515096241 | 0.200538464 | -0.314558 | 0.000332 |
| cg06613515 | chr15 | Open Sea    | 0.49769948  | 0.183614639 | -0.314085 | 0.017716 |

|            |       |             |             |             |           |          |
|------------|-------|-------------|-------------|-------------|-----------|----------|
| cg13455960 | chr15 | Island      | 0.623925145 | 0.310687542 | -0.313238 | 0.008064 |
| cg06733347 | chr15 | Open Sea    | 0.859196229 | 0.546913374 | -0.312283 | 0.013705 |
| cg20889818 | chr15 | South Shore | 0.370808382 | 0.058613545 | -0.312195 | 1.67E-08 |
| cg16276982 | chr15 | South Shore | 0.484224605 | 0.175744047 | -0.308481 | 0.000384 |
| cg01287936 | chr15 | Island      | 0.374176446 | 0.065834488 | -0.308342 | 3.61E-06 |
| cg04875128 | chr15 | Island      | 0.394681284 | 0.089310869 | -0.30537  | 0.004995 |
| cg15159104 | chr15 | Open Sea    | 0.412508815 | 0.107632596 | -0.304876 | 0.000676 |
| cg09999700 | chr15 | Open Sea    | 0.430000401 | 0.126500065 | -0.3035   | 0.001236 |
| cg02013741 | chr15 | Open Sea    | 0.707140603 | 0.403657005 | -0.303484 | 0.005785 |
| cg27279991 | chr15 | Island      | 0.381540582 | 0.078323382 | -0.303217 | 0.000396 |
| cg03799283 | chr15 | Island      | 0.364514216 | 0.062258582 | -0.302256 | 3.71E-06 |
| cg12134633 | chr15 | Open Sea    | 0.53748071  | 0.237630366 | -0.29985  | 0.040602 |
| cg20801110 | chr15 | South Shore | 0.649455658 | 0.355861937 | -0.293594 | 0.002938 |
| cg20551756 | chr15 | North Shore | 0.442251417 | 0.148909765 | -0.293342 | 0.022178 |
| cg05895376 | chr15 | North Shelf | 0.557680705 | 0.26486518  | -0.292816 | 0.026935 |
| cg17896927 | chr15 | Island      | 0.416373317 | 0.124083067 | -0.29229  | 0.009416 |
| cg27628707 | chr15 | Open Sea    | 0.317953638 | 0.027639565 | -0.290314 | 1.33E-07 |
| cg14833933 | chr15 | Open Sea    | 0.665595597 | 0.377346276 | -0.288249 | 0.002549 |
| cg20927731 | chr15 | South Shore | 0.337843404 | 0.050193895 | -0.28765  | 7.92E-06 |
| cg16718263 | chr15 | Open Sea    | 0.37680295  | 0.089699844 | -0.287103 | 0.003162 |
| cg01868896 | chr15 | Open Sea    | 0.856584054 | 0.571507548 | -0.285077 | 9.56E-11 |
| cg21669441 | chr15 | Island      | 0.359932906 | 0.077016444 | -0.282916 | 0.000268 |
| cg16543027 | chr15 | Open Sea    | 0.49788953  | 0.222762068 | -0.275127 | 0.001343 |
| cg05314394 | chr15 | North Shelf | 0.340860118 | 0.066194248 | -0.274666 | 0.000297 |
| cg25649641 | chr15 | Island      | 0.317148748 | 0.046597481 | -0.270551 | 3.45E-06 |
| cg26516200 | chr15 | North Shelf | 0.576667944 | 0.306172932 | -0.270495 | 0.008993 |
| cg19642402 | chr15 | Open Sea    | 0.32927688  | 0.059422291 | -0.269855 | 6.04E-07 |
| cg01366725 | chr15 | Open Sea    | 0.348675186 | 0.079775764 | -0.268899 | 2.26E-05 |
| cg20592391 | chr15 | Open Sea    | 0.364889468 | 0.097997266 | -0.266892 | 1.15E-05 |
| cg21244086 | chr15 | North Shore | 0.47778243  | 0.211745002 | -0.266037 | 0.004486 |
| cg07068735 | chr15 | Open Sea    | 0.417756666 | 0.152650214 | -0.265106 | 0.004092 |
| cg05335955 | chr15 | Island      | 0.303427713 | 0.038443392 | -0.264984 | 0.000136 |
| cg22888055 | chr15 | South Shore | 0.546136145 | 0.285274694 | -0.260861 | 0.00799  |
| cg12426344 | chr15 | Island      | 0.421191846 | 0.16133419  | -0.259858 | 0.000701 |
| cg14074476 | chr15 | Island      | 0.498389768 | 0.242598398 | -0.255791 | 0.033347 |
| cg10763234 | chr15 | Island      | 0.358353258 | 0.103159175 | -0.255194 | 0.026087 |
| cg10142436 | chr15 | North Shelf | 0.324464586 | 0.06961323  | -0.254851 | 2.97E-05 |
| cg00623200 | chr15 | South Shore | 0.593946909 | 0.34740312  | -0.246544 | 7.64E-05 |
| cg14093936 | chr15 | South Shore | 0.474779685 | 0.228459364 | -0.24632  | 0.019489 |
| cg04890851 | chr15 | North Shore | 0.385505688 | 0.13956383  | -0.245942 | 0.000842 |
| cg03829137 | chr15 | South Shore | 0.445290481 | 0.19968919  | -0.245601 | 0.01642  |
| cg18588323 | chr15 | Island      | 0.376112953 | 0.131672084 | -0.244441 | 0.017769 |
| cg27132471 | chr15 | Open Sea    | 0.374468648 | 0.130040391 | -0.244428 | 0.027258 |
| cg04640920 | chr15 | South Shore | 0.657024121 | 0.414300832 | -0.242723 | 0.019655 |
| cg03177551 | chr15 | Island      | 0.287294847 | 0.045475497 | -0.241819 | 0.000254 |
| cg10186733 | chr15 | South Shore | 0.283498713 | 0.042819634 | -0.240679 | 9.28E-05 |
| cg24956533 | chr15 | South Shore | 0.312736745 | 0.074646023 | -0.238091 | 0.002704 |
| cg26222247 | chr15 | Island      | 0.361747939 | 0.124253677 | -0.237494 | 0.000154 |
| cg12530503 | chr15 | Island      | 0.433077445 | 0.196178671 | -0.236899 | 0.031955 |
| cg12382398 | chr15 | Island      | 0.500260834 | 0.26378022  | -0.236481 | 0.006851 |

|            |       |             |             |             |           |          |
|------------|-------|-------------|-------------|-------------|-----------|----------|
| cg10156302 | chr15 | Open Sea    | 0.801916673 | 0.566674346 | -0.235242 | 0.00061  |
| cg17400113 | chr15 | Island      | 0.640291332 | 0.406339395 | -0.233952 | 0.003355 |
| cg06675273 | chr15 | North Shore | 0.369412349 | 0.136540032 | -0.232872 | 0.020846 |
| cg23411013 | chr15 | Open Sea    | 0.427800242 | 0.195257457 | -0.232543 | 0.017013 |
| cg26851289 | chr15 | Open Sea    | 0.528773678 | 0.298993169 | -0.229781 | 0.017743 |
| cg08438435 | chr15 | Island      | 0.324163232 | 0.094972586 | -0.229191 | 0.010003 |
| cg27501645 | chr15 | Island      | 0.338618332 | 0.109733644 | -0.228885 | 0.00036  |
| cg02779016 | chr15 | Open Sea    | 0.30234388  | 0.074014032 | -0.22833  | 0.000513 |
| cg26899598 | chr15 | South Shore | 0.296551083 | 0.069963124 | -0.226588 | 0.006917 |
| cg04181528 | chr15 | Island      | 0.412865705 | 0.18704285  | -0.225823 | 8.74E-06 |
| cg26531804 | chr15 | Island      | 0.552215981 | 0.328490287 | -0.223726 | 0.001758 |
| cg03927133 | chr15 | Island      | 0.300526686 | 0.079618929 | -0.220908 | 0.000169 |
| cg12058064 | chr15 | South Shelf | 0.685754176 | 0.465945993 | -0.219808 | 1.02E-05 |
| cg27046604 | chr15 | Island      | 0.509761181 | 0.290025887 | -0.219735 | 1.76E-05 |
| cg18210365 | chr15 | North Shore | 0.787903562 | 0.569449378 | -0.218454 | 0.015153 |
| cg25866089 | chr15 | Open Sea    | 0.581744052 | 0.363839772 | -0.217904 | 0.000158 |
| cg14482712 | chr15 | Open Sea    | 0.86595904  | 0.649482175 | -0.216477 | 0.003448 |
| cg00687306 | chr15 | Open Sea    | 0.454138183 | 0.238244237 | -0.215894 | 0.000139 |
| cg24456002 | chr15 | North Shore | 0.269215589 | 0.055031947 | -0.214184 | 3.94E-05 |
| cg01152302 | chr15 | Island      | 0.262243239 | 0.048180384 | -0.214063 | 0.002258 |
| cg18973515 | chr15 | North Shore | 0.618716317 | 0.405025842 | -0.21369  | 0.000303 |
| cg08891110 | chr15 | North Shore | 0.295447756 | 0.083125776 | -0.212322 | 0.000669 |
| cg26405020 | chr15 | North Shore | 0.306610879 | 0.094740848 | -0.21187  | 1.58E-05 |
| cg02900766 | chr15 | Island      | 0.338502439 | 0.126677376 | -0.211825 | 0.016709 |
| cg12382153 | chr15 | North Shore | 0.266250089 | 0.054853883 | -0.211396 | 8.03E-05 |
| cg03338933 | chr15 | Open Sea    | 0.397691059 | 0.186744155 | -0.210947 | 0.031932 |
| cg13920934 | chr15 | Open Sea    | 0.269640658 | 0.059323787 | -0.210317 | 7.53E-05 |
| cg11479165 | chr15 | South Shore | 0.280024643 | 0.07137124  | -0.208653 | 0.001042 |
| cg07713411 | chr15 | Island      | 0.24881863  | 0.040867535 | -0.207951 | 0.001036 |
| cg00213301 | chr15 | North Shelf | 0.56561545  | 0.358899243 | -0.206716 | 0.026936 |
| cg13055199 | chr15 | South Shore | 0.473965514 | 0.268558172 | -0.205407 | 0.018228 |
| cg12364131 | chr15 | South Shore | 0.439351535 | 0.234394762 | -0.204957 | 0.019686 |
| cg27058988 | chr15 | Open Sea    | 0.301602652 | 0.097406508 | -0.204196 | 0.001823 |
| cg05364884 | chr16 | Open Sea    | 0.629567633 | 0.062814915 | -0.566753 | 1.83E-07 |
| cg08394412 | chr16 | Island      | 0.701942791 | 0.145822679 | -0.55612  | 0.002061 |
| cg08773462 | chr16 | Open Sea    | 0.676167698 | 0.1551086   | -0.521059 | 0.029152 |
| cg01252526 | chr16 | North Shore | 0.638876506 | 0.118081535 | -0.520795 | 3.4E-05  |
| cg07336350 | chr16 | Island      | 0.676705383 | 0.165226959 | -0.511478 | 3.5E-12  |
| cg02910054 | chr16 | Open Sea    | 0.646667444 | 0.151978527 | -0.494689 | 6.47E-07 |
| cg08537367 | chr16 | Open Sea    | 0.648059857 | 0.168380072 | -0.47968  | 0.028987 |
| cg07676361 | chr16 | South Shore | 0.621663889 | 0.153481995 | -0.468182 | 3.82E-05 |
| cg03720617 | chr16 | Open Sea    | 0.527541771 | 0.095707898 | -0.431834 | 1.69E-07 |
| cg09275704 | chr16 | Island      | 0.564331747 | 0.140944305 | -0.423387 | 0.004133 |
| cg09854734 | chr16 | Island      | 0.52123887  | 0.101094455 | -0.420144 | 2.11E-05 |
| cg06916001 | chr16 | Open Sea    | 0.485070612 | 0.068735009 | -0.416336 | 5.49E-07 |
| cg00928596 | chr16 | Open Sea    | 0.491135613 | 0.076663422 | -0.414472 | 7.98E-07 |
| cg00327947 | chr16 | Open Sea    | 0.773846626 | 0.365641564 | -0.408205 | 0.028523 |
| cg04294437 | chr16 | Island      | 0.52432574  | 0.117339654 | -0.406986 | 1.08E-10 |
| cg16547186 | chr16 | Open Sea    | 0.504256663 | 0.114667349 | -0.389589 | 0.005388 |
| cg02893550 | chr16 | Island      | 0.458524973 | 0.069357439 | -0.389168 | 2.8E-05  |

|            |       |             |             |             |           |          |
|------------|-------|-------------|-------------|-------------|-----------|----------|
| cg08032924 | chr16 | Island      | 0.444796177 | 0.058068573 | -0.386728 | 1.97E-07 |
| cg26706803 | chr16 | Open Sea    | 0.524735138 | 0.146065954 | -0.378669 | 1.78E-05 |
| cg26580413 | chr16 | Open Sea    | 0.561941106 | 0.190119454 | -0.371822 | 0.014079 |
| cg06658404 | chr16 | Open Sea    | 0.4335667   | 0.063638415 | -0.369928 | 1E-05    |
| cg01683883 | chr16 | Island      | 0.431193071 | 0.066018192 | -0.365175 | 8.38E-08 |
| cg01059100 | chr16 | South Shore | 0.499322347 | 0.135161582 | -0.364161 | 0.000604 |
| cg09608652 | chr16 | Open Sea    | 0.43832167  | 0.075235098 | -0.363087 | 1.7E-08  |
| cg10292154 | chr16 | Open Sea    | 0.435323161 | 0.072923581 | -0.3624   | 1.48E-06 |
| cg09849405 | chr16 | Island      | 0.434010447 | 0.071814151 | -0.362196 | 6.03E-07 |
| cg07905568 | chr16 | North Shore | 0.816259706 | 0.462935639 | -0.353324 | 5.88E-10 |
| cg22388260 | chr16 | Open Sea    | 0.434689323 | 0.082423894 | -0.352265 | 6.9E-05  |
| cg16626067 | chr16 | Island      | 0.416193128 | 0.064091801 | -0.352101 | 3.64E-06 |
| cg05766489 | chr16 | Island      | 0.599646934 | 0.248095618 | -0.351551 | 0.015574 |
| cg00767069 | chr16 | Open Sea    | 0.571978583 | 0.22137964  | -0.350599 | 0.036531 |
| cg01934674 | chr16 | Open Sea    | 0.851195783 | 0.501675365 | -0.34952  | 0.001473 |
| cg16783204 | chr16 | Island      | 0.413316114 | 0.065268739 | -0.348047 | 2.26E-05 |
| cg02246055 | chr16 | Island      | 0.458813191 | 0.112675178 | -0.346138 | 5.09E-05 |
| cg04253954 | chr16 | North Shelf | 0.578355526 | 0.235012312 | -0.343343 | 0.045048 |
| cg02220965 | chr16 | North Shore | 0.543325743 | 0.200876275 | -0.342449 | 0.000569 |
| cg05333146 | chr16 | Island      | 0.794442619 | 0.453566404 | -0.340876 | 0.011653 |
| cg06666025 | chr16 | Island      | 0.394829927 | 0.055108891 | -0.339721 | 7.05E-06 |
| cg05083852 | chr16 | South Shore | 0.670107607 | 0.342654492 | -0.327453 | 2.07E-06 |
| cg02716792 | chr16 | South Shore | 0.390493427 | 0.064537038 | -0.325956 | 3.71E-06 |
| cg05546863 | chr16 | Island      | 0.456063825 | 0.132172173 | -0.323892 | 0.000626 |
| cg08347500 | chr16 | Island      | 0.370313583 | 0.051313319 | -0.319    | 6.94E-07 |
| cg08082763 | chr16 | Open Sea    | 0.892618236 | 0.588361565 | -0.304257 | 0.040304 |
| cg00657780 | chr16 | Open Sea    | 0.765315928 | 0.463372065 | -0.301944 | 0.040403 |
| cg26537209 | chr16 | Island      | 0.391242247 | 0.090249946 | -0.300992 | 1.65E-06 |
| cg06014057 | chr16 | Open Sea    | 0.818484241 | 0.517788931 | -0.300695 | 0.000525 |
| cg02886263 | chr16 | Open Sea    | 0.390205595 | 0.089724642 | -0.300481 | 0.0067   |
| cg04917160 | chr16 | Open Sea    | 0.372780892 | 0.07269802  | -0.300083 | 0.000139 |
| cg07405121 | chr16 | North Shelf | 0.692603989 | 0.39272993  | -0.299874 | 4.12E-05 |
| cg17655614 | chr16 | North Shore | 0.551493306 | 0.259684166 | -0.291809 | 0.031159 |
| cg27406919 | chr16 | Open Sea    | 0.325840418 | 0.036721959 | -0.289118 | 3.83E-05 |
| cg08787837 | chr16 | Open Sea    | 0.409531149 | 0.120813081 | -0.288718 | 0.033881 |
| cg12100791 | chr16 | South Shore | 0.587328767 | 0.299728071 | -0.287601 | 0.020669 |
| cg05251269 | chr16 | North Shelf | 0.583485586 | 0.296499966 | -0.286986 | 0.000909 |
| cg00809164 | chr16 | Island      | 0.469155709 | 0.185709615 | -0.283446 | 1.34E-05 |
| cg00029825 | chr16 | Island      | 0.859193314 | 0.577052929 | -0.28214  | 0.045245 |
| cg01885503 | chr16 | Island      | 0.489132014 | 0.207680774 | -0.281451 | 0.000748 |
| cg02194243 | chr16 | Island      | 0.434471149 | 0.153967512 | -0.280504 | 0.038063 |
| cg26505691 | chr16 | Open Sea    | 0.341736566 | 0.061580281 | -0.280156 | 1.17E-05 |
| cg02533339 | chr16 | Open Sea    | 0.336440861 | 0.061442005 | -0.274999 | 1.49E-05 |
| cg03070236 | chr16 | North Shelf | 0.434141737 | 0.159290346 | -0.274851 | 4.36E-05 |
| cg02488129 | chr16 | Open Sea    | 0.33630827  | 0.063138934 | -0.273169 | 1.17E-05 |
| cg08632420 | chr16 | Open Sea    | 0.623961914 | 0.354410606 | -0.269551 | 0.026595 |
| cg06465011 | chr16 | Open Sea    | 0.671935026 | 0.404043027 | -0.267892 | 0.001623 |
| cg07153665 | chr16 | Island      | 0.372754135 | 0.105904712 | -0.266849 | 5.08E-06 |
| cg02900356 | chr16 | South Shore | 0.335757273 | 0.070498541 | -0.265259 | 0.000105 |
| cg05544500 | chr16 | Island      | 0.452608273 | 0.187516722 | -0.265092 | 0.026535 |

|            |       |             |             |             |           |          |
|------------|-------|-------------|-------------|-------------|-----------|----------|
| cg14585371 | chr16 | Island      | 0.452599197 | 0.189755511 | -0.262844 | 0.016603 |
| cg03662014 | chr16 | Island      | 0.354194578 | 0.091504699 | -0.26269  | 0.000166 |
| cg02896970 | chr16 | Open Sea    | 0.802485459 | 0.540603501 | -0.261882 | 0.001722 |
| cg00449812 | chr16 | North Shore | 0.633205221 | 0.372977382 | -0.260228 | 0.024225 |
| cg08318842 | chr16 | North Shore | 0.311001427 | 0.05087527  | -0.260126 | 3.93E-05 |
| cg22167353 | chr16 | Island      | 0.326581664 | 0.067665683 | -0.258916 | 0.000833 |
| cg02513379 | chr16 | Open Sea    | 0.631640639 | 0.372941715 | -0.258699 | 0.003195 |
| cg03303766 | chr16 | North Shore | 0.784996741 | 0.528217143 | -0.25678  | 0.000414 |
| cg16672223 | chr16 | Open Sea    | 0.47932232  | 0.223721286 | -0.255601 | 0.016471 |
| cg02102533 | chr16 | Island      | 0.850306087 | 0.595327639 | -0.254978 | 8.37E-08 |
| cg01337391 | chr16 | Island      | 0.400038232 | 0.145065412 | -0.254973 | 6.67E-05 |
| cg08730348 | chr16 | South Shore | 0.299474702 | 0.04702642  | -0.252448 | 7.54E-05 |
| cg06969933 | chr16 | North Shore | 0.918563404 | 0.666488384 | -0.252075 | 0.00672  |
| cg10264687 | chr16 | North Shore | 0.295532895 | 0.043621278 | -0.251912 | 0.00012  |
| cg27589814 | chr16 | North Shelf | 0.455316342 | 0.209033775 | -0.246283 | 3.05E-06 |
| cg08601673 | chr16 | North Shelf | 0.432818497 | 0.187099101 | -0.245719 | 0.036986 |
| cg02352240 | chr16 | Island      | 0.464429613 | 0.218964782 | -0.245465 | 0.000329 |
| cg08076437 | chr16 | Island      | 0.518225763 | 0.274458605 | -0.243767 | 1.43E-06 |
| cg09816471 | chr16 | Island      | 0.374070825 | 0.130997301 | -0.243074 | 0.000717 |
| cg06367311 | chr16 | Island      | 0.311568184 | 0.069969507 | -0.241599 | 0.002188 |
| cg09115984 | chr16 | South Shore | 0.387883789 | 0.146872106 | -0.241012 | 0.000808 |
| cg09530163 | chr16 | North Shore | 0.31802665  | 0.077186633 | -0.24084  | 0.009095 |
| cg07300060 | chr16 | Island      | 0.420870871 | 0.180667319 | -0.240204 | 0.036543 |
| cg00700638 | chr16 | Open Sea    | 0.931699653 | 0.693485652 | -0.238214 | 0.010376 |
| cg04861096 | chr16 | North Shore | 0.421636598 | 0.183471979 | -0.238165 | 0.006752 |
| cg08770761 | chr16 | Island      | 0.399887326 | 0.162844542 | -0.237043 | 0.003401 |
| cg13813391 | chr16 | Island      | 0.855515773 | 0.619924791 | -0.235591 | 0.045831 |
| cg10359913 | chr16 | South Shore | 0.851939528 | 0.620068078 | -0.231871 | 0.004397 |
| cg09477019 | chr16 | Open Sea    | 0.666815256 | 0.436187257 | -0.230628 | 0.000635 |
| cg08959144 | chr16 | Open Sea    | 0.393670585 | 0.164093889 | -0.229577 | 0.049112 |
| cg07027430 | chr16 | South Shore | 0.331966199 | 0.102996982 | -0.228969 | 0.001685 |
| cg09107055 | chr16 | Open Sea    | 0.583065592 | 0.354266593 | -0.228799 | 3.87E-05 |
| cg08698997 | chr16 | Open Sea    | 0.363861241 | 0.136160767 | -0.2277   | 0.008177 |
| cg04612608 | chr16 | Open Sea    | 0.825622183 | 0.598281658 | -0.227341 | 6.86E-07 |
| cg16454902 | chr16 | Open Sea    | 0.607685583 | 0.38101102  | -0.226675 | 2.33E-06 |
| cg08155347 | chr16 | North Shore | 0.353236077 | 0.12666383  | -0.226572 | 0.012665 |
| cg02143404 | chr16 | Open Sea    | 0.377716299 | 0.152844549 | -0.224872 | 0.045125 |
| cg26920007 | chr16 | South Shore | 0.835597421 | 0.611458848 | -0.224139 | 0.022137 |
| cg08512490 | chr16 | Island      | 0.270356184 | 0.046853378 | -0.223503 | 0.001272 |
| cg06297391 | chr16 | South Shore | 0.306448368 | 0.083276032 | -0.223172 | 0.000786 |
| cg00454305 | chr16 | Island      | 0.636374867 | 0.413677775 | -0.222697 | 0.04117  |
| cg16696400 | chr16 | Open Sea    | 0.31844975  | 0.097339658 | -0.22111  | 0.000501 |
| cg26672452 | chr16 | South Shore | 0.805328197 | 0.585370072 | -0.219958 | 0.007033 |
| cg06279276 | chr16 | Island      | 0.276732395 | 0.057080229 | -0.219652 | 0.001621 |
| cg13271951 | chr16 | North Shore | 0.527038615 | 0.310164124 | -0.216874 | 0.001007 |
| cg08057411 | chr16 | Open Sea    | 0.870422882 | 0.653687049 | -0.216736 | 0.005122 |
| cg04890560 | chr16 | Island      | 0.307101616 | 0.091210535 | -0.215891 | 0.000157 |
| cg02732252 | chr16 | Island      | 0.347239958 | 0.134124635 | -0.213115 | 0.049841 |
| cg17683110 | chr16 | Island      | 0.316883769 | 0.108169248 | -0.208715 | 0.006584 |
| cg26772894 | chr16 | Open Sea    | 0.558350213 | 0.352335627 | -0.206015 | 0.000883 |

|            |       |             |             |             |           |          |
|------------|-------|-------------|-------------|-------------|-----------|----------|
| cg01615339 | chr16 | South Shore | 0.401397412 | 0.195537012 | -0.20586  | 0.010887 |
| cg02030219 | chr16 | North Shelf | 0.353083214 | 0.148345707 | -0.204738 | 4.96E-06 |
| cg00036976 | chr16 | Open Sea    | 0.382717559 | 0.178341181 | -0.204376 | 5.83E-05 |
| cg00453202 | chr16 | Open Sea    | 0.295951535 | 0.092300672 | -0.203651 | 6.44E-05 |
| cg00128386 | chr16 | North Shore | 0.850661662 | 0.64775156  | -0.20291  | 0.037528 |
| cg09920228 | chr16 | South Shore | 0.603545831 | 0.400855668 | -0.20269  | 0.018551 |
| cg09140114 | chr16 | Open Sea    | 0.767049652 | 0.56465289  | -0.202397 | 5.33E-05 |
| cg01821058 | chr16 | North Shore | 0.247165451 | 0.044798491 | -0.202367 | 0.001216 |
| cg11375102 | chr16 | Island      | 0.567059299 | 0.365601136 | -0.201458 | 0.043469 |
| cg06128999 | chr16 | South Shore | 0.534300925 | 0.3333649   | -0.200936 | 0.012326 |
| cg06376598 | chr17 | Open Sea    | 0.606682403 | 0.072656691 | -0.534026 | 7.21E-11 |
| cg12776171 | chr17 | Island      | 0.673887083 | 0.163404766 | -0.510482 | 8.96E-08 |
| cg08471713 | chr17 | Open Sea    | 0.676895521 | 0.172862615 | -0.504033 | 0.011549 |
| cg21851534 | chr17 | Island      | 0.584198039 | 0.097112507 | -0.487086 | 0.014374 |
| cg09300114 | chr17 | Island      | 0.58750837  | 0.127086239 | -0.460422 | 0.000172 |
| cg12744859 | chr17 | Island      | 0.626719848 | 0.167930484 | -0.458789 | 0.009083 |
| cg22473770 | chr17 | Open Sea    | 0.611944788 | 0.164190172 | -0.447755 | 0.027321 |
| cg00435173 | chr17 | Open Sea    | 0.625870419 | 0.187593302 | -0.438277 | 0.027265 |
| cg07673979 | chr17 | South Shelf | 0.618282089 | 0.185270265 | -0.433012 | 3.74E-08 |
| cg14244013 | chr17 | Island      | 0.64761342  | 0.220999    | -0.426614 | 9.85E-05 |
| cg19430537 | chr17 | Island      | 0.702922249 | 0.277300455 | -0.425622 | 0.005219 |
| cg04911139 | chr17 | Open Sea    | 0.539705902 | 0.114735233 | -0.424971 | 4.05E-09 |
| cg24136700 | chr17 | North Shore | 0.608998321 | 0.187215062 | -0.421783 | 3.58E-05 |
| cg24394631 | chr17 | South Shore | 0.50793735  | 0.093148361 | -0.414789 | 1.64E-05 |
| cg13533061 | chr17 | Open Sea    | 0.51041017  | 0.102321371 | -0.408089 | 0.000479 |
| cg11692124 | chr17 | Island      | 0.539146449 | 0.131527113 | -0.407619 | 1.97E-05 |
| cg24439686 | chr17 | Open Sea    | 0.480412992 | 0.073562886 | -0.40685  | 1.5E-07  |
| cg16863795 | chr17 | Island      | 0.481314046 | 0.079564881 | -0.401749 | 1.69E-08 |
| cg02299328 | chr17 | North Shore | 0.616493439 | 0.215331495 | -0.401162 | 8.44E-10 |
| cg12887033 | chr17 | South Shelf | 0.454167906 | 0.057767018 | -0.396401 | 5.85E-07 |
| cg09313705 | chr17 | South Shore | 0.509027358 | 0.11966752  | -0.38936  | 4.08E-07 |
| cg21327194 | chr17 | Island      | 0.556804439 | 0.169462426 | -0.387342 | 0.003041 |
| cg06412669 | chr17 | Open Sea    | 0.548535426 | 0.161622968 | -0.386912 | 0.005733 |
| cg07442907 | chr17 | Open Sea    | 0.450751982 | 0.066845034 | -0.383907 | 1.3E-08  |
| cg15938050 | chr17 | Open Sea    | 0.509187231 | 0.128208969 | -0.380978 | 1.53E-05 |
| cg10235355 | chr17 | Island      | 0.570648428 | 0.202882019 | -0.367766 | 0.028089 |
| cg22292753 | chr17 | Open Sea    | 0.556785448 | 0.190919079 | -0.365866 | 0.003025 |
| cg04030486 | chr17 | Island      | 0.53570557  | 0.170133487 | -0.365572 | 0.031229 |
| cg22583148 | chr17 | Island      | 0.485096919 | 0.120231459 | -0.364865 | 0.005374 |
| cg17746570 | chr17 | North Shelf | 0.606265731 | 0.24322797  | -0.363038 | 0.00107  |
| cg11487526 | chr17 | Island      | 0.417091409 | 0.056097585 | -0.360994 | 1.3E-06  |
| cg11638071 | chr17 | South Shelf | 0.521920582 | 0.166042515 | -0.355878 | 0.005722 |
| cg23796525 | chr17 | Open Sea    | 0.522662488 | 0.169069955 | -0.353593 | 9.06E-08 |
| cg08224920 | chr17 | Island      | 0.537832022 | 0.185860979 | -0.351971 | 0.004873 |
| cg22349396 | chr17 | Island      | 0.530945687 | 0.18834874  | -0.342597 | 0.001159 |
| cg21301440 | chr17 | Island      | 0.501871993 | 0.166092137 | -0.33578  | 0.000154 |
| cg06105699 | chr17 | Open Sea    | 0.710419069 | 0.376089847 | -0.334329 | 3.87E-10 |
| cg18105842 | chr17 | North Shore | 0.57139696  | 0.2415211   | -0.329876 | 1.59E-06 |
| cg10080732 | chr17 | North Shore | 0.531638999 | 0.202062684 | -0.329576 | 0.032893 |
| cg02398342 | chr17 | North Shore | 0.727634301 | 0.398086022 | -0.329548 | 0.044194 |

|            |       |             |             |             |           |          |
|------------|-------|-------------|-------------|-------------|-----------|----------|
| cg19559537 | chr17 | Open Sea    | 0.375329466 | 0.046429452 | -0.3289   | 1.94E-05 |
| cg03845363 | chr17 | Open Sea    | 0.563961158 | 0.235837878 | -0.328123 | 0.025766 |
| cg17406383 | chr17 | Island      | 0.487604271 | 0.159536634 | -0.328068 | 0.039377 |
| cg01303141 | chr17 | Island      | 0.839085038 | 0.517017517 | -0.322068 | 0.018459 |
| cg22097768 | chr17 | Island      | 0.351152922 | 0.03213034  | -0.319023 | 7.99E-07 |
| cg05166871 | chr17 | Open Sea    | 0.631221761 | 0.312588729 | -0.318633 | 0.02923  |
| cg10980948 | chr17 | Island      | 0.743909584 | 0.427957993 | -0.315952 | 0.038436 |
| cg13492227 | chr17 | North Shore | 0.472802228 | 0.159528921 | -0.313273 | 0.028164 |
| cg25563256 | chr17 | North Shore | 0.382761283 | 0.073845859 | -0.308915 | 2.6E-05  |
| cg14050053 | chr17 | South Shore | 0.484519505 | 0.176429403 | -0.30809  | 0.029646 |
| cg08301181 | chr17 | North Shore | 0.494999222 | 0.188891301 | -0.306108 | 0.029792 |
| cg04529938 | chr17 | Island      | 0.583103746 | 0.277622931 | -0.305481 | 0.04077  |
| cg22777724 | chr17 | South Shore | 0.448237654 | 0.143660694 | -0.304577 | 0.000269 |
| cg19056772 | chr17 | North Shore | 0.386006441 | 0.083062499 | -0.302944 | 2.61E-05 |
| cg14417329 | chr17 | Island      | 0.382744199 | 0.080098206 | -0.302646 | 8.03E-05 |
| cg12061069 | chr17 | North Shore | 0.403697075 | 0.101194599 | -0.302502 | 3.94E-06 |
| cg12882189 | chr17 | South Shore | 0.410559633 | 0.108402401 | -0.302157 | 0.019767 |
| cg10183965 | chr17 | North Shelf | 0.776760498 | 0.474654833 | -0.302106 | 0.000341 |
| cg11838224 | chr17 | Island      | 0.352076547 | 0.050330253 | -0.301746 | 3.21E-05 |
| cg22027433 | chr17 | Island      | 0.35841507  | 0.058895964 | -0.299519 | 1.94E-05 |
| cg09433910 | chr17 | North Shore | 0.568370371 | 0.269647065 | -0.298723 | 0.001981 |
| cg02574861 | chr17 | South Shelf | 0.939387692 | 0.641691085 | -0.297697 | 0.003776 |
| cg11329058 | chr17 | Open Sea    | 0.49909511  | 0.203246485 | -0.295849 | 0.037618 |
| cg13545874 | chr17 | South Shore | 0.373566856 | 0.078123005 | -0.295444 | 0.0003   |
| cg10543374 | chr17 | Island      | 0.840511827 | 0.545323072 | -0.295189 | 0.01627  |
| cg12788108 | chr17 | Island      | 0.478294301 | 0.183441465 | -0.294853 | 0.019288 |
| cg10140454 | chr17 | Island      | 0.666436685 | 0.372009333 | -0.294427 | 0.000183 |
| cg04293307 | chr17 | North Shelf | 0.521832177 | 0.233016354 | -0.288816 | 0.017835 |
| cg20805367 | chr17 | South Shore | 0.338047703 | 0.050457073 | -0.287591 | 2.11E-05 |
| cg25181144 | chr17 | North Shelf | 0.405156491 | 0.117651252 | -0.287505 | 0.000153 |
| cg21809624 | chr17 | Open Sea    | 0.801006335 | 0.514565931 | -0.28644  | 3.42E-05 |
| cg00036408 | chr17 | Island      | 0.348489399 | 0.064455685 | -0.284034 | 0.000412 |
| cg01603973 | chr17 | Open Sea    | 0.342031991 | 0.058162419 | -0.28387  | 3.33E-05 |
| cg11794215 | chr17 | Open Sea    | 0.732043367 | 0.448615467 | -0.283428 | 0.033846 |
| cg26877678 | chr17 | Open Sea    | 0.753225857 | 0.472419676 | -0.280806 | 0.0001   |
| cg06942183 | chr17 | South Shore | 0.37428038  | 0.097567188 | -0.276713 | 0.001707 |
| cg24355809 | chr17 | South Shore | 0.804135423 | 0.527541599 | -0.276594 | 1.58E-06 |
| cg04858553 | chr17 | South Shelf | 0.466237001 | 0.190042416 | -0.276195 | 0.011927 |
| cg10870160 | chr17 | North Shelf | 0.778832323 | 0.50332936  | -0.275503 | 0.002234 |
| cg10016358 | chr17 | Open Sea    | 0.722564094 | 0.447554394 | -0.27501  | 0.049424 |
| cg10829727 | chr17 | Island      | 0.352960474 | 0.078275404 | -0.274685 | 7.49E-06 |
| cg10454193 | chr17 | North Shore | 0.393527321 | 0.119487571 | -0.27404  | 0.011605 |
| cg07563400 | chr17 | South Shore | 0.366539166 | 0.094663946 | -0.271875 | 0.000177 |
| cg10633463 | chr17 | South Shore | 0.366823084 | 0.095046921 | -0.271776 | 0.00025  |
| cg23415212 | chr17 | Island      | 0.387992765 | 0.11758389  | -0.270409 | 9.36E-06 |
| cg04184297 | chr17 | Island      | 0.332030185 | 0.062599163 | -0.269431 | 2.29E-05 |
| cg00356694 | chr17 | Open Sea    | 0.380808944 | 0.111676404 | -0.269133 | 0.003381 |
| cg05953751 | chr17 | Island      | 0.83972158  | 0.571097613 | -0.268624 | 1.12E-05 |
| cg09601584 | chr17 | Island      | 0.385998362 | 0.1175035   | -0.268495 | 0.030739 |
| cg07248223 | chr17 | Open Sea    | 0.398772035 | 0.131056681 | -0.267715 | 0.046657 |

|            |       |             |             |             |           |          |
|------------|-------|-------------|-------------|-------------|-----------|----------|
| cg19863411 | chr17 | Island      | 0.395995346 | 0.129025449 | -0.26697  | 0.00039  |
| cg11049075 | chr17 | North Shore | 0.592224534 | 0.325273367 | -0.266951 | 0.033808 |
| cg25577130 | chr17 | North Shore | 0.462002579 | 0.195566758 | -0.266436 | 0.000261 |
| cg09354263 | chr17 | South Shelf | 0.845141943 | 0.579480452 | -0.265661 | 0.021463 |
| cg05744184 | chr17 | North Shore | 0.442413332 | 0.177651249 | -0.264762 | 1.8E-05  |
| cg02143487 | chr17 | Island      | 0.340897573 | 0.076146034 | -0.264752 | 0.000743 |
| cg19942495 | chr17 | Island      | 0.364172312 | 0.100252897 | -0.263919 | 3.11E-05 |
| cg03706951 | chr17 | Open Sea    | 0.363140804 | 0.099498504 | -0.263642 | 0.000886 |
| cg14787477 | chr17 | North Shore | 0.618870125 | 0.355832137 | -0.263038 | 0.026047 |
| cg16347155 | chr17 | North Shore | 0.570369745 | 0.307776924 | -0.262593 | 0.014919 |
| cg04464719 | chr17 | North Shelf | 0.75702033  | 0.495338638 | -0.261682 | 0.000189 |
| cg08129331 | chr17 | Open Sea    | 0.7448738   | 0.483443056 | -0.261431 | 0.044695 |
| cg20401567 | chr17 | North Shore | 0.385809579 | 0.124753794 | -0.261056 | 0.001644 |
| cg25748136 | chr17 | North Shore | 0.391470602 | 0.130576329 | -0.260894 | 0.000457 |
| cg22888787 | chr17 | Island      | 0.596095792 | 0.335312809 | -0.260783 | 0.010698 |
| cg18033628 | chr17 | Open Sea    | 0.391635485 | 0.132176157 | -0.259459 | 0.044723 |
| cg02619155 | chr17 | Open Sea    | 0.810845536 | 0.552569165 | -0.258276 | 0.018192 |
| cg23750361 | chr17 | South Shelf | 0.902357408 | 0.64571284  | -0.256645 | 0.036581 |
| cg13755873 | chr17 | Island      | 0.362616197 | 0.106951094 | -0.255665 | 0.001194 |
| cg09628887 | chr17 | Island      | 0.327321423 | 0.072676046 | -0.254645 | 8.95E-05 |
| cg17005273 | chr17 | Open Sea    | 0.390605094 | 0.137012024 | -0.253593 | 0.002315 |
| cg01461824 | chr17 | Open Sea    | 0.35622084  | 0.10329705  | -0.252924 | 0.001261 |
| cg22763680 | chr17 | South Shore | 0.320754946 | 0.068239942 | -0.252515 | 0.000227 |
| cg14654468 | chr17 | Island      | 0.308776533 | 0.05629778  | -0.252479 | 6.78E-05 |
| cg12184886 | chr17 | Island      | 0.358842442 | 0.106734621 | -0.252108 | 0.000174 |
| cg16776981 | chr17 | Island      | 0.78556917  | 0.533846407 | -0.251723 | 0.010651 |
| cg10715361 | chr17 | South Shelf | 0.736703717 | 0.485237117 | -0.251467 | 0.036982 |
| cg05490023 | chr17 | South Shelf | 0.655836252 | 0.404372819 | -0.251463 | 0.007404 |
| cg08550205 | chr17 | Island      | 0.774707248 | 0.524947658 | -0.24976  | 0.027385 |
| cg24686189 | chr17 | Open Sea    | 0.421517002 | 0.172243145 | -0.249274 | 0.006173 |
| cg01841306 | chr17 | North Shore | 0.337903687 | 0.089703684 | -0.2482   | 0.000914 |
| cg25175654 | chr17 | Open Sea    | 0.626196483 | 0.378879449 | -0.247317 | 6.46E-07 |
| cg08195512 | chr17 | North Shore | 0.308264861 | 0.065652502 | -0.242612 | 0.000764 |
| cg05611719 | chr17 | South Shore | 0.41512961  | 0.172754524 | -0.242375 | 0.008266 |
| cg22807449 | chr17 | South Shore | 0.471546118 | 0.230664256 | -0.240882 | 0.042081 |
| cg19753476 | chr17 | Island      | 0.606190887 | 0.365764673 | -0.240426 | 4.77E-06 |
| cg10024583 | chr17 | Island      | 0.358302571 | 0.118381794 | -0.239921 | 0.001865 |
| cg00498360 | chr17 | Open Sea    | 0.801805442 | 0.563113847 | -0.238692 | 0.045669 |
| cg25151916 | chr17 | Island      | 0.378253647 | 0.139907549 | -0.238346 | 0.01159  |
| cg23398508 | chr17 | North Shore | 0.314424332 | 0.076209017 | -0.238215 | 0.002    |
| cg02915739 | chr17 | Island      | 0.749518035 | 0.511702625 | -0.237815 | 0.031801 |
| cg08817867 | chr17 | Open Sea    | 0.312929058 | 0.075160252 | -0.237769 | 0.009364 |
| cg24375215 | chr17 | Open Sea    | 0.352668986 | 0.114942004 | -0.237727 | 3.85E-05 |
| cg11267630 | chr17 | South Shore | 0.290986043 | 0.053663997 | -0.237322 | 4.41E-05 |
| cg06827038 | chr17 | Open Sea    | 0.520592795 | 0.286165719 | -0.234427 | 4.66E-06 |
| cg01550307 | chr17 | Open Sea    | 0.321880795 | 0.088693994 | -0.233187 | 0.000332 |
| cg03000846 | chr17 | Island      | 0.62477401  | 0.394911605 | -0.229862 | 0.019132 |
| cg00549475 | chr17 | North Shore | 0.294435946 | 0.065254901 | -0.229181 | 6.1E-05  |
| cg08296680 | chr17 | Island      | 0.272916458 | 0.045075533 | -0.227841 | 0.001116 |
| cg25032094 | chr17 | Island      | 0.458054965 | 0.230228857 | -0.227826 | 0.035324 |

|            |       |             |             |             |           |          |
|------------|-------|-------------|-------------|-------------|-----------|----------|
| cg19533977 | chr17 | Open Sea    | 0.294624218 | 0.068142926 | -0.226481 | 0.000615 |
| cg02822259 | chr17 | Island      | 0.293817067 | 0.068208691 | -0.225608 | 0.000287 |
| cg19601328 | chr17 | Open Sea    | 0.340419757 | 0.115327265 | -0.225092 | 0.036291 |
| cg16325482 | chr17 | North Shore | 0.334798174 | 0.109953668 | -0.224845 | 0.001273 |
| cg20464360 | chr17 | Island      | 0.736292741 | 0.5123668   | -0.223926 | 3.83E-05 |
| cg18576374 | chr17 | Open Sea    | 0.298043149 | 0.074989723 | -0.223053 | 0.004179 |
| cg02025583 | chr17 | Island      | 0.312229947 | 0.089786177 | -0.222444 | 0.01838  |
| cg18067859 | chr17 | North Shore | 0.386328563 | 0.163952134 | -0.222376 | 0.004171 |
| cg22533606 | chr17 | Island      | 0.327297761 | 0.105279176 | -0.222019 | 3.46E-05 |
| cg12846139 | chr17 | Island      | 0.283195666 | 0.065081507 | -0.218114 | 0.00221  |
| cg11352083 | chr17 | North Shore | 0.294254207 | 0.076536204 | -0.217718 | 0.001248 |
| cg20855296 | chr17 | North Shore | 0.4318016   | 0.214529894 | -0.217272 | 0.041594 |
| cg05527267 | chr17 | Open Sea    | 0.79490812  | 0.578378303 | -0.21653  | 0.021454 |
| cg05276469 | chr17 | Island      | 0.289462376 | 0.073159076 | -0.216303 | 0.003051 |
| cg09269848 | chr17 | South Shore | 0.456082318 | 0.239827351 | -0.216255 | 0.011102 |
| cg05110391 | chr17 | Open Sea    | 0.249014212 | 0.032912637 | -0.216102 | 0.000833 |
| cg11344638 | chr17 | Open Sea    | 0.58471592  | 0.368675221 | -0.216041 | 2.66E-10 |
| cg04071967 | chr17 | Open Sea    | 0.56278966  | 0.346778381 | -0.216011 | 0.00781  |
| cg25309567 | chr17 | North Shelf | 0.881125553 | 0.666058771 | -0.215067 | 1.59E-07 |
| cg19169154 | chr17 | Open Sea    | 0.573339146 | 0.358653905 | -0.214685 | 0.047847 |
| cg15730030 | chr17 | Open Sea    | 0.379756787 | 0.165713643 | -0.214043 | 0.005885 |
| cg10351914 | chr17 | Open Sea    | 0.373240554 | 0.159569318 | -0.213671 | 1.29E-05 |
| cg05096467 | chr17 | Open Sea    | 0.608812088 | 0.395758504 | -0.213054 | 0.033616 |
| cg12117658 | chr17 | South Shelf | 0.255345514 | 0.042761799 | -0.212584 | 0.000559 |
| cg24396400 | chr17 | Open Sea    | 0.898847985 | 0.686722935 | -0.212125 | 6.63E-12 |
| cg25069807 | chr17 | Open Sea    | 0.922584511 | 0.71046824  | -0.212116 | 3.79E-05 |
| cg14173476 | chr17 | Open Sea    | 0.790538251 | 0.578735133 | -0.211803 | 0.032496 |
| cg17210004 | chr17 | Open Sea    | 0.558058636 | 0.347074723 | -0.210984 | 0.007949 |
| cg06856735 | chr17 | Island      | 0.813216039 | 0.603313098 | -0.209903 | 4.56E-05 |
| cg08189801 | chr17 | Island      | 0.264690597 | 0.058233163 | -0.206457 | 0.000206 |
| cg15298286 | chr17 | Open Sea    | 0.32780106  | 0.122576691 | -0.205224 | 0.043023 |
| cg07778819 | chr17 | Island      | 0.294760204 | 0.089775337 | -0.204985 | 0.015438 |
| cg18156204 | chr17 | Island      | 0.243117927 | 0.038426304 | -0.204692 | 0.00066  |
| cg12552293 | chr17 | South Shore | 0.607310845 | 0.403072319 | -0.204239 | 0.00649  |
| cg08039301 | chr17 | Island      | 0.35945104  | 0.155552776 | -0.203898 | 0.000104 |
| cg12417689 | chr17 | North Shore | 0.701194297 | 0.498199776 | -0.202995 | 0.001342 |
| cg13416381 | chr17 | South Shore | 0.465334661 | 0.263347422 | -0.201987 | 0.024989 |
| cg07584066 | chr17 | Island      | 0.347556754 | 0.145632063 | -0.201925 | 0.033923 |
| cg24389488 | chr17 | Island      | 0.287810594 | 0.087774801 | -0.200036 | 0.018757 |
| cg25140190 | chr18 | North Shore | 0.683158122 | 0.232633856 | -0.450524 | 4.08E-10 |
| cg03507241 | chr18 | Island      | 0.437137506 | 0.030848998 | -0.406289 | 5.48E-06 |
| cg00737978 | chr18 | Open Sea    | 0.477099124 | 0.082812118 | -0.394287 | 4.17E-07 |
| cg07307078 | chr18 | Island      | 0.43402471  | 0.049333049 | -0.384692 | 1.72E-06 |
| cg19558029 | chr18 | North Shore | 0.470249954 | 0.087745429 | -0.382505 | 2.24E-06 |
| cg19174643 | chr18 | North Shore | 0.44607834  | 0.109959494 | -0.336119 | 3.6E-06  |
| cg24404630 | chr18 | Open Sea    | 0.401191318 | 0.065505981 | -0.335685 | 1.68E-08 |
| cg01288184 | chr18 | Open Sea    | 0.379020974 | 0.056844287 | -0.322177 | 3.8E-05  |
| cg16177732 | chr18 | Island      | 0.458277163 | 0.137865396 | -0.320412 | 4.66E-06 |
| cg12171183 | chr18 | North Shore | 0.361107689 | 0.053089792 | -0.308018 | 3.12E-06 |
| cg24884543 | chr18 | Island      | 0.381485227 | 0.073625924 | -0.307859 | 0.000358 |

|            |       |             |             |             |           |          |
|------------|-------|-------------|-------------|-------------|-----------|----------|
| cg11931731 | chr18 | Island      | 0.372352569 | 0.066789647 | -0.305563 | 3.59E-05 |
| cg23624808 | chr18 | Island      | 0.403695458 | 0.098355292 | -0.30534  | 0.003731 |
| cg16657538 | chr18 | Island      | 0.35451584  | 0.051907428 | -0.302608 | 0.000151 |
| cg16741573 | chr18 | Open Sea    | 0.401422352 | 0.098997203 | -0.302425 | 5.07E-05 |
| cg18356448 | chr18 | South Shore | 0.789560969 | 0.491894159 | -0.297667 | 1.19E-08 |
| cg21685776 | chr18 | South Shore | 0.463116927 | 0.16588438  | -0.297233 | 0.015193 |
| cg06080874 | chr18 | Island      | 0.388055513 | 0.091474876 | -0.296581 | 0.012878 |
| cg05529506 | chr18 | Island      | 0.33853914  | 0.048571507 | -0.289968 | 3.32E-05 |
| cg19165390 | chr18 | Island      | 0.419546243 | 0.143693227 | -0.275853 | 0.009974 |
| cg05869537 | chr18 | Open Sea    | 0.483345396 | 0.207902045 | -0.275443 | 5.99E-07 |
| cg16870867 | chr18 | Island      | 0.364244889 | 0.090719426 | -0.273525 | 0.00065  |
| cg19448837 | chr18 | North Shore | 0.512201314 | 0.241426222 | -0.270775 | 0.016632 |
| cg03178798 | chr18 | Island      | 0.410595123 | 0.142191682 | -0.268403 | 0.002167 |
| cg00956964 | chr18 | Island      | 0.342775144 | 0.076706171 | -0.266069 | 0.000461 |
| cg00430895 | chr18 | North Shore | 0.301254352 | 0.040286721 | -0.260968 | 1.87E-05 |
| cg22130205 | chr18 | South Shore | 0.359439159 | 0.102493405 | -0.256946 | 0.001114 |
| cg14825976 | chr18 | Open Sea    | 0.302427408 | 0.050189945 | -0.252237 | 0.000189 |
| cg16547027 | chr18 | Island      | 0.51713492  | 0.268437735 | -0.248697 | 0.026273 |
| cg06198398 | chr18 | North Shore | 0.286660776 | 0.044389864 | -0.242271 | 0.000301 |
| cg01022219 | chr18 | Island      | 0.513060029 | 0.272557687 | -0.240502 | 0.003423 |
| cg08076830 | chr18 | Island      | 0.392418437 | 0.153126426 | -0.239292 | 0.028124 |
| cg11950360 | chr18 | South Shore | 0.565472829 | 0.326482907 | -0.23899  | 0.044086 |
| cg15439862 | chr18 | Island      | 0.328594853 | 0.0900588   | -0.238536 | 0.00115  |
| cg14439622 | chr18 | Island      | 0.523813957 | 0.291873357 | -0.231941 | 0.035707 |
| cg20299690 | chr18 | North Shelf | 0.798638635 | 0.569226392 | -0.229412 | 6.44E-05 |
| cg12390344 | chr18 | Island      | 0.357505405 | 0.129961523 | -0.227544 | 5.05E-05 |
| cg12298745 | chr18 | Island      | 0.351952177 | 0.126854336 | -0.225098 | 0.000778 |
| cg13476901 | chr18 | South Shore | 0.458776593 | 0.235285291 | -0.223491 | 0.015197 |
| cg15526954 | chr18 | Island      | 0.298426483 | 0.075473526 | -0.222953 | 0.00079  |
| cg15673034 | chr18 | Island      | 0.283382541 | 0.060700815 | -0.222682 | 0.007388 |
| cg02158486 | chr18 | North Shore | 0.402386795 | 0.179717995 | -0.222669 | 0.019068 |
| cg21734356 | chr18 | North Shore | 0.744962239 | 0.524495729 | -0.220467 | 3.49E-06 |
| cg06972911 | chr18 | South Shore | 0.339821715 | 0.120412006 | -0.21941  | 0.00109  |
| cg00918181 | chr18 | Island      | 0.298999683 | 0.080010614 | -0.218989 | 0.00142  |
| cg13996395 | chr18 | Island      | 0.688123014 | 0.470088023 | -0.218035 | 3.92E-05 |
| cg20469799 | chr18 | North Shore | 0.27485831  | 0.064520264 | -0.210338 | 0.0004   |
| cg25705486 | chr18 | Island      | 0.252612948 | 0.043070726 | -0.209542 | 0.000202 |
| cg12026967 | chr18 | Island      | 0.844968996 | 0.635910332 | -0.209059 | 0.000178 |
| cg11564711 | chr18 | Island      | 0.397891961 | 0.190525225 | -0.207367 | 0.018192 |
| cg11832722 | chr18 | Island      | 0.275907077 | 0.070033694 | -0.205873 | 0.0025   |
| cg19389293 | chr18 | Island      | 0.40540857  | 0.204137047 | -0.201272 | 0.022095 |
| cg08420572 | chr19 | Island      | 0.585166631 | 0.037202207 | -0.547964 | 4.13E-12 |
| cg13456960 | chr19 | North Shore | 0.562477696 | 0.053635562 | -0.508842 | 2.44E-09 |
| cg24102622 | chr19 | Island      | 0.534305985 | 0.0396139   | -0.494692 | 2.63E-10 |
| cg20454073 | chr19 | Island      | 0.548802162 | 0.072423732 | -0.476378 | 5.37E-10 |
| cg02849693 | chr19 | Island      | 0.586564516 | 0.136701257 | -0.449863 | 0.001148 |
| cg12019614 | chr19 | Island      | 0.577379152 | 0.129902924 | -0.447476 | 3.65E-08 |
| cg23690893 | chr19 | Open Sea    | 0.661858187 | 0.216850591 | -0.445008 | 0.000133 |
| cg11660879 | chr19 | Island      | 0.51308591  | 0.069656584 | -0.443429 | 7.25E-09 |
| cg25716814 | chr19 | Island      | 0.489000677 | 0.051456774 | -0.437544 | 1.1E-09  |

|            |       |             |             |             |           |          |
|------------|-------|-------------|-------------|-------------|-----------|----------|
| cg15054077 | chr19 | Island      | 0.466447365 | 0.04142609  | -0.425021 | 1.53E-08 |
| cg27304533 | chr19 | Island      | 0.488382081 | 0.066996474 | -0.421386 | 2.93E-10 |
| cg03675258 | chr19 | Island      | 0.482010005 | 0.064845714 | -0.417164 | 2.35E-07 |
| cg07517893 | chr19 | Island      | 0.469619769 | 0.054591442 | -0.415028 | 9.4E-08  |
| cg01619846 | chr19 | South Shore | 0.485448804 | 0.076148164 | -0.409301 | 1.88E-08 |
| cg02961707 | chr19 | Island      | 0.474237575 | 0.076122439 | -0.398115 | 2.39E-07 |
| cg09547756 | chr19 | Island      | 0.533320299 | 0.140046467 | -0.393274 | 0.03537  |
| cg22436086 | chr19 | Island      | 0.622538966 | 0.230406123 | -0.392133 | 0.000321 |
| cg25801292 | chr19 | Island      | 0.473977247 | 0.08370947  | -0.390268 | 4.58E-07 |
| cg15123730 | chr19 | Island      | 0.699482204 | 0.310333894 | -0.389148 | 0.000113 |
| cg17928147 | chr19 | South Shore | 0.448472057 | 0.060312145 | -0.38816  | 6.64E-06 |
| cg07888912 | chr19 | North Shore | 0.466713498 | 0.081066631 | -0.385647 | 1.1E-06  |
| cg04728310 | chr19 | Island      | 0.502533408 | 0.120129215 | -0.382404 | 2.76E-07 |
| cg05345154 | chr19 | Island      | 0.481389381 | 0.106602098 | -0.374787 | 0.036995 |
| cg24923931 | chr19 | Island      | 0.706274775 | 0.333395297 | -0.372879 | 0.036456 |
| cg08865365 | chr19 | Island      | 0.46788208  | 0.098880568 | -0.369002 | 1.7E-07  |
| cg08607018 | chr19 | Island      | 0.483515333 | 0.114817377 | -0.368698 | 0.000185 |
| cg26000619 | chr19 | Island      | 0.460467508 | 0.094586526 | -0.365881 | 0.002683 |
| cg23372544 | chr19 | Island      | 0.549472996 | 0.196533696 | -0.352939 | 0.021678 |
| cg06615152 | chr19 | Island      | 0.612314544 | 0.265408327 | -0.346906 | 0.023506 |
| cg16167052 | chr19 | Island      | 0.500477919 | 0.153992001 | -0.346486 | 2.65E-07 |
| cg20092122 | chr19 | Open Sea    | 0.42475437  | 0.078985659 | -0.345769 | 4.84E-06 |
| cg11254700 | chr19 | Island      | 0.451040458 | 0.109686032 | -0.341354 | 0.001299 |
| cg17666539 | chr19 | Island      | 0.491487705 | 0.150192983 | -0.341295 | 0.04649  |
| cg10591771 | chr19 | North Shore | 0.392400282 | 0.053696762 | -0.338704 | 5.28E-05 |
| cg15483758 | chr19 | South Shore | 0.445464528 | 0.108157587 | -0.337307 | 2.04E-06 |
| cg26659805 | chr19 | Island      | 0.386345231 | 0.050659911 | -0.335685 | 1.29E-05 |
| cg01641792 | chr19 | Open Sea    | 0.391071009 | 0.055947692 | -0.335123 | 8.98E-05 |
| cg11299264 | chr19 | Open Sea    | 0.376069639 | 0.044798871 | -0.331271 | 7.03E-06 |
| cg08332594 | chr19 | Island      | 0.384225351 | 0.054346525 | -0.329879 | 3.96E-05 |
| cg10169241 | chr19 | Island      | 0.44994268  | 0.120809851 | -0.329133 | 0.000992 |
| cg03658337 | chr19 | Open Sea    | 0.45537928  | 0.131202367 | -0.324177 | 0.008346 |
| cg26465391 | chr19 | South Shore | 0.403261392 | 0.081581656 | -0.32168  | 3.94E-06 |
| cg03605761 | chr19 | South Shore | 0.65191832  | 0.330449222 | -0.321469 | 0.026166 |
| cg11896587 | chr19 | Island      | 0.412764847 | 0.091324392 | -0.32144  | 1.17E-07 |
| cg02571816 | chr19 | Island      | 0.397291403 | 0.075938499 | -0.321353 | 7.76E-05 |
| cg11325997 | chr19 | Island      | 0.417137877 | 0.096794854 | -0.320343 | 8.3E-07  |
| cg27324426 | chr19 | South Shore | 0.413191596 | 0.093201633 | -0.31999  | 2.31E-05 |
| cg03162410 | chr19 | Open Sea    | 0.644852272 | 0.326600376 | -0.318252 | 0.00661  |
| cg22550549 | chr19 | Island      | 0.498534972 | 0.180902135 | -0.317633 | 0.036245 |
| cg15639581 | chr19 | North Shore | 0.367037963 | 0.051047174 | -0.315991 | 3.42E-07 |
| cg21956434 | chr19 | Open Sea    | 0.540710212 | 0.225122821 | -0.315587 | 1.54E-06 |
| cg22004069 | chr19 | North Shelf | 0.54221111  | 0.227701283 | -0.31451  | 3.84E-07 |
| cg13741406 | chr19 | South Shore | 0.488937236 | 0.177059782 | -0.311877 | 0.009715 |
| cg17380238 | chr19 | Island      | 0.393299163 | 0.081561209 | -0.311738 | 0.007822 |
| cg22992497 | chr19 | Island      | 0.649638286 | 0.338043324 | -0.311595 | 1.9E-06  |
| cg18417954 | chr19 | Island      | 0.397855308 | 0.086994332 | -0.310861 | 1.48E-07 |
| cg11311352 | chr19 | North Shelf | 0.418104241 | 0.107663355 | -0.310441 | 0.028021 |
| cg17110052 | chr19 | Open Sea    | 0.767754073 | 0.462026306 | -0.305728 | 0.007218 |
| cg27288226 | chr19 | Island      | 0.38723547  | 0.083118357 | -0.304117 | 1.24E-05 |

|            |       |             |             |             |           |          |
|------------|-------|-------------|-------------|-------------|-----------|----------|
| cg14573876 | chr19 | South Shelf | 0.55870774  | 0.255192059 | -0.303516 | 0.006578 |
| cg09578475 | chr19 | Island      | 0.364503015 | 0.063752104 | -0.300751 | 8.67E-06 |
| cg07355926 | chr19 | Island      | 0.4148374   | 0.114303511 | -0.300534 | 0.007517 |
| cg18447740 | chr19 | North Shore | 0.564319731 | 0.26394521  | -0.300375 | 1.58E-09 |
| cg21006031 | chr19 | Island      | 0.409837636 | 0.112716277 | -0.297121 | 0.035313 |
| cg15215348 | chr19 | South Shore | 0.48804023  | 0.193810978 | -0.294229 | 0.03557  |
| cg03562414 | chr19 | Island      | 0.415920277 | 0.122318079 | -0.293602 | 0.00011  |
| cg02812482 | chr19 | North Shore | 0.386887517 | 0.093298641 | -0.293589 | 6.14E-08 |
| cg14252502 | chr19 | South Shore | 0.417441704 | 0.125073373 | -0.292368 | 4.45E-08 |
| cg01268824 | chr19 | South Shore | 0.428413997 | 0.13837945  | -0.290035 | 0.000123 |
| cg27105390 | chr19 | Island      | 0.410844159 | 0.121061073 | -0.289783 | 0.019475 |
| cg14064148 | chr19 | Island      | 0.417763992 | 0.130056282 | -0.287708 | 2.73E-05 |
| cg25685510 | chr19 | Open Sea    | 0.370268489 | 0.085045624 | -0.285223 | 1.53E-06 |
| cg22752052 | chr19 | Island      | 0.469720679 | 0.184660946 | -0.28506  | 0.014234 |
| cg17344048 | chr19 | South Shore | 0.436997294 | 0.152342222 | -0.284655 | 0.032763 |
| cg08668790 | chr19 | South Shore | 0.35776847  | 0.074768334 | -0.283    | 0.000373 |
| cg16200879 | chr19 | Island      | 0.388988503 | 0.110058282 | -0.27893  | 0.000109 |
| cg27480580 | chr19 | South Shore | 0.495659306 | 0.217253335 | -0.278406 | 0.00017  |
| cg14191279 | chr19 | North Shelf | 0.447485175 | 0.169106393 | -0.278379 | 0.000192 |
| cg07830557 | chr19 | South Shelf | 0.37254468  | 0.095033058 | -0.277512 | 0.011375 |
| cg23218559 | chr19 | Island      | 0.365316921 | 0.088068228 | -0.277249 | 0.044382 |
| cg26824126 | chr19 | South Shore | 0.308149164 | 0.032575145 | -0.275574 | 2.29E-05 |
| cg19399220 | chr19 | Island      | 0.551868624 | 0.27636043  | -0.275508 | 0.002129 |
| cg15746696 | chr19 | South Shore | 0.337812765 | 0.062646566 | -0.275166 | 0.000367 |
| cg25400396 | chr19 | South Shore | 0.382346549 | 0.107403767 | -0.274943 | 0.008193 |
| cg16572540 | chr19 | South Shelf | 0.642844523 | 0.369565501 | -0.273279 | 0.034297 |
| cg19981796 | chr19 | Island      | 0.551671383 | 0.278964129 | -0.272707 | 0.000287 |
| cg10693058 | chr19 | Island      | 0.376308943 | 0.104748704 | -0.27156  | 0.043638 |
| cg14021375 | chr19 | North Shore | 0.413532566 | 0.143903695 | -0.269629 | 0.001399 |
| cg09310092 | chr19 | North Shelf | 0.382582005 | 0.115505037 | -0.267077 | 0.046185 |
| cg15007222 | chr19 | North Shore | 0.841307507 | 0.574334625 | -0.266973 | 0.030909 |
| cg24937727 | chr19 | Island      | 0.60999335  | 0.34491991  | -0.265073 | 6.43E-05 |
| cg22231400 | chr19 | Island      | 0.37852315  | 0.113798475 | -0.264725 | 0.019818 |
| cg01483656 | chr19 | North Shore | 0.32969497  | 0.065826962 | -0.263868 | 0.009474 |
| cg00448761 | chr19 | Open Sea    | 0.334023905 | 0.072152431 | -0.261871 | 0.000221 |
| cg13033578 | chr19 | Island      | 0.39279939  | 0.132174972 | -0.260624 | 0.032579 |
| cg25537993 | chr19 | Island      | 0.326821418 | 0.066207678 | -0.260614 | 5.07E-05 |
| cg22782873 | chr19 | Island      | 0.770163495 | 0.509605422 | -0.260558 | 0.045388 |
| cg03126579 | chr19 | Island      | 0.315630796 | 0.05607181  | -0.259559 | 6.66E-05 |
| cg09980176 | chr19 | North Shore | 0.330490865 | 0.070940949 | -0.25955  | 0.000208 |
| cg00299047 | chr19 | Island      | 0.510942161 | 0.252611028 | -0.258331 | 0.019003 |
| cg25252585 | chr19 | Island      | 0.291112758 | 0.03282238  | -0.25829  | 0.000256 |
| cg00371453 | chr19 | Island      | 0.315460931 | 0.057698689 | -0.257762 | 2.84E-05 |
| cg06882591 | chr19 | Island      | 0.356192035 | 0.098935504 | -0.257257 | 3.63E-05 |
| cg10928466 | chr19 | Island      | 0.76221233  | 0.506327479 | -0.255885 | 0.026797 |
| cg27049766 | chr19 | Island      | 0.301310331 | 0.047301804 | -0.254009 | 0.000293 |
| cg14266237 | chr19 | North Shore | 0.686678466 | 0.434848642 | -0.25183  | 0.008843 |
| cg24345715 | chr19 | Open Sea    | 0.283645306 | 0.032374241 | -0.251271 | 1.64E-05 |
| cg17522445 | chr19 | Island      | 0.841897689 | 0.591336902 | -0.250561 | 1.28E-06 |
| cg26918756 | chr19 | Island      | 0.3439898   | 0.094206341 | -0.249783 | 8.85E-05 |

|            |       |             |             |             |           |          |
|------------|-------|-------------|-------------|-------------|-----------|----------|
| cg12277416 | chr19 | Island      | 0.732092889 | 0.483091648 | -0.249001 | 0.020909 |
| cg22528521 | chr19 | Island      | 0.875248351 | 0.626400073 | -0.248848 | 0.009326 |
| cg18465133 | chr19 | Island      | 0.444318792 | 0.195481434 | -0.248837 | 2.21E-08 |
| cg04052466 | chr19 | Island      | 0.326303908 | 0.077643781 | -0.24866  | 0.014878 |
| cg00286125 | chr19 | Island      | 0.327681273 | 0.079293672 | -0.248388 | 0.016739 |
| cg23031103 | chr19 | Open Sea    | 0.314432472 | 0.067241278 | -0.247191 | 9.29E-05 |
| cg19216817 | chr19 | North Shelf | 0.693795693 | 0.447560038 | -0.246236 | 0.02648  |
| cg09515953 | chr19 | Island      | 0.33397103  | 0.087955603 | -0.246015 | 0.008592 |
| cg22513901 | chr19 | North Shore | 0.352796434 | 0.107803011 | -0.244993 | 0.005761 |
| cg24911113 | chr19 | Island      | 0.416938454 | 0.17316387  | -0.243775 | 0.000192 |
| cg19058865 | chr19 | Island      | 0.305150622 | 0.061672786 | -0.243478 | 0.000701 |
| cg20901882 | chr19 | Island      | 0.561012818 | 0.317752099 | -0.243261 | 1.45E-05 |
| cg08871964 | chr19 | Island      | 0.394466129 | 0.15259405  | -0.241872 | 0.01764  |
| cg03234186 | chr19 | South Shore | 0.314847909 | 0.073043983 | -0.241804 | 0.000439 |
| cg06905453 | chr19 | North Shore | 0.33539041  | 0.093859057 | -0.241531 | 0.000744 |
| cg10132208 | chr19 | Island      | 0.327376018 | 0.085886042 | -0.24149  | 3.51E-05 |
| cg23087300 | chr19 | South Shore | 0.474888904 | 0.233900621 | -0.240988 | 0.030117 |
| cg00848780 | chr19 | Island      | 0.458466758 | 0.2175597   | -0.240907 | 0.009188 |
| cg11584690 | chr19 | Open Sea    | 0.301100685 | 0.063394249 | -0.237706 | 3.45E-05 |
| cg17408527 | chr19 | Island      | 0.347918643 | 0.110506033 | -0.237413 | 0.005251 |
| cg02928664 | chr19 | Island      | 0.326879988 | 0.089669235 | -0.237211 | 0.005237 |
| cg05216501 | chr19 | Island      | 0.351702034 | 0.115671439 | -0.236031 | 0.010716 |
| cg15177613 | chr19 | Island      | 0.48648614  | 0.2509811   | -0.235505 | 0.015795 |
| cg03337057 | chr19 | Island      | 0.483096672 | 0.249046075 | -0.234051 | 0.024499 |
| cg01442620 | chr19 | North Shelf | 0.630021835 | 0.397450728 | -0.232571 | 0.000996 |
| cg10374084 | chr19 | Island      | 0.408032816 | 0.176454354 | -0.231578 | 0.007108 |
| cg19648552 | chr19 | South Shelf | 0.805824365 | 0.57497301  | -0.230851 | 7.56E-06 |
| cg23499126 | chr19 | Island      | 0.457237307 | 0.228113895 | -0.229123 | 0.000322 |
| cg25361850 | chr19 | South Shore | 0.669370851 | 0.440764234 | -0.228607 | 0.000138 |
| cg08035555 | chr19 | South Shore | 0.340743986 | 0.112699715 | -0.228044 | 0.017413 |
| cg11345505 | chr19 | South Shore | 0.278738093 | 0.050917367 | -0.227821 | 0.002622 |
| cg22557662 | chr19 | Island      | 0.28266146  | 0.055250434 | -0.227411 | 0.00569  |
| cg14062238 | chr19 | Island      | 0.923989202 | 0.696635645 | -0.227354 | 0.000701 |
| cg10750464 | chr19 | South Shore | 0.636791739 | 0.409811743 | -0.22698  | 0.049114 |
| cg15455864 | chr19 | South Shore | 0.468455008 | 0.242983221 | -0.225472 | 0.01013  |
| cg24694329 | chr19 | South Shelf | 0.753730904 | 0.528475081 | -0.225256 | 0.021916 |
| cg13611094 | chr19 | North Shelf | 0.732054158 | 0.507638997 | -0.224415 | 0.016045 |
| cg02534744 | chr19 | Island      | 0.539214928 | 0.31480862  | -0.224406 | 2.09E-05 |
| cg08154437 | chr19 | Island      | 0.262568391 | 0.038983403 | -0.223585 | 0.001046 |
| cg17117277 | chr19 | Island      | 0.267921281 | 0.044813816 | -0.223107 | 7.31E-06 |
| cg19004883 | chr19 | South Shelf | 0.757599088 | 0.534527181 | -0.223072 | 0.043095 |
| cg05213896 | chr19 | Island      | 0.327430937 | 0.104685975 | -0.222745 | 0.029389 |
| cg18660278 | chr19 | Open Sea    | 0.637186423 | 0.414555678 | -0.222631 | 0.035171 |
| cg22201588 | chr19 | Island      | 0.261479402 | 0.039262726 | -0.222217 | 0.000506 |
| cg07737503 | chr19 | Open Sea    | 0.378601998 | 0.156527547 | -0.222074 | 0.006813 |
| cg10064322 | chr19 | Island      | 0.642390264 | 0.420815856 | -0.221574 | 4.44E-06 |
| cg01573747 | chr19 | Island      | 0.266964659 | 0.047574127 | -0.219391 | 0.00035  |
| cg08067617 | chr19 | North Shore | 0.333925168 | 0.115552899 | -0.218372 | 0.007219 |
| cg09643544 | chr19 | Island      | 0.293682385 | 0.075367958 | -0.218314 | 5.63E-05 |
| cg03491584 | chr19 | South Shore | 0.302109624 | 0.085641276 | -0.216468 | 9.7E-05  |

|            |       |             |             |             |           |          |
|------------|-------|-------------|-------------|-------------|-----------|----------|
| cg18851960 | chr19 | South Shore | 0.366798869 | 0.150767776 | -0.216031 | 0.003809 |
| cg16105687 | chr19 | Island      | 0.282625424 | 0.066874036 | -0.215751 | 5.99E-06 |
| cg14753355 | chr19 | North Shore | 0.3131377   | 0.098478725 | -0.214659 | 0.036779 |
| cg22030032 | chr19 | North Shelf | 0.265427082 | 0.052498659 | -0.212928 | 0.001835 |
| cg09245582 | chr19 | North Shore | 0.914766126 | 0.701991521 | -0.212775 | 0.042405 |
| cg23325673 | chr19 | Island      | 0.307166448 | 0.094687807 | -0.212479 | 0.000156 |
| cg00919077 | chr19 | South Shore | 0.275770931 | 0.063541756 | -0.212229 | 0.00025  |
| cg06710981 | chr19 | Island      | 0.574568923 | 0.362419132 | -0.21215  | 0.022938 |
| cg03315649 | chr19 | Island      | 0.877809788 | 0.665849185 | -0.211961 | 0.01017  |
| cg20311631 | chr19 | Island      | 0.504870196 | 0.293356927 | -0.211513 | 0.002822 |
| cg06574716 | chr19 | Open Sea    | 0.329466327 | 0.118833101 | -0.210633 | 0.000338 |
| cg08264859 | chr19 | Island      | 0.716254994 | 0.505697003 | -0.210558 | 0.01038  |
| cg08873940 | chr19 | Island      | 0.884060547 | 0.673918514 | -0.210142 | 4.25E-08 |
| cg00689651 | chr19 | Island      | 0.305401104 | 0.095321111 | -0.21008  | 0.046699 |
| cg01626681 | chr19 | North Shore | 0.26076898  | 0.050804507 | -0.209964 | 4.05E-05 |
| cg15690347 | chr19 | Island      | 0.32674964  | 0.117639404 | -0.20911  | 0.002021 |
| cg13461178 | chr19 | North Shore | 0.255918401 | 0.047029593 | -0.208889 | 5.77E-05 |
| cg01215442 | chr19 | Island      | 0.402770053 | 0.194149128 | -0.208621 | 0.043774 |
| cg22876153 | chr19 | North Shelf | 0.880105642 | 0.671857289 | -0.208248 | 0.014448 |
| cg02624701 | chr19 | Island      | 0.40741408  | 0.199299208 | -0.208115 | 0.024918 |
| cg06369349 | chr19 | Open Sea    | 0.349659    | 0.141985845 | -0.207673 | 0.004626 |
| cg24185443 | chr19 | Island      | 0.282254106 | 0.074619313 | -0.207635 | 0.000138 |
| cg10226967 | chr19 | North Shore | 0.307744932 | 0.100524843 | -0.20722  | 0.002237 |
| cg17810176 | chr19 | North Shore | 0.271123817 | 0.064119063 | -0.207005 | 0.001178 |
| cg19355079 | chr19 | North Shore | 0.281010531 | 0.074067537 | -0.206943 | 0.000769 |
| cg06776703 | chr19 | Island      | 0.260483903 | 0.054413833 | -0.20607  | 0.011778 |
| cg03731896 | chr19 | South Shore | 0.331213308 | 0.125378071 | -0.205835 | 0.027967 |
| cg15679064 | chr19 | Island      | 0.355398837 | 0.149822804 | -0.205576 | 0.000379 |
| cg24794228 | chr19 | Island      | 0.300876134 | 0.095880935 | -0.204995 | 0.0059   |
| cg26356061 | chr19 | South Shore | 0.390530641 | 0.185941996 | -0.204589 | 0.048925 |
| cg12534008 | chr19 | Island      | 0.521916512 | 0.318571365 | -0.203345 | 0.008577 |
| cg03147691 | chr19 | North Shore | 0.269042015 | 0.066366802 | -0.202675 | 0.00021  |
| cg26870745 | chr19 | Open Sea    | 0.254777025 | 0.052235556 | -0.202541 | 0.001895 |
| cg00630794 | chr19 | Island      | 0.304746877 | 0.102273722 | -0.202473 | 0.000341 |
| cg22299467 | chr19 | North Shore | 0.296593392 | 0.094254652 | -0.202339 | 5.01E-05 |
| cg01403948 | chr19 | South Shore | 0.320598373 | 0.119581668 | -0.201017 | 0.036826 |
| cg07608565 | chr19 | Island      | 0.392490627 | 0.192035995 | -0.200455 | 0.000373 |
| cg21105227 | chr19 | Island      | 0.27052559  | 0.070170161 | -0.200355 | 0.006153 |
| cg25513635 | chr19 | South Shore | 0.32741838  | 0.127336966 | -0.200081 | 0.000375 |
| cg27598107 | chr2  | South Shore | 0.64076096  | 0.095494311 | -0.545267 | 5.91E-06 |
| cg19744173 | chr2  | North Shelf | 0.627370505 | 0.116144174 | -0.511226 | 0.03378  |
| cg03517776 | chr2  | North Shore | 0.56683862  | 0.058510396 | -0.508328 | 1.89E-08 |
| cg05758467 | chr2  | South Shelf | 0.68307496  | 0.182433088 | -0.500642 | 2.45E-05 |
| cg25586410 | chr2  | North Shore | 0.603832689 | 0.106811911 | -0.497021 | 1.68E-08 |
| cg04065472 | chr2  | North Shore | 0.566402339 | 0.120564969 | -0.445837 | 0.002663 |
| cg26575450 | chr2  | North Shore | 0.486290478 | 0.049150053 | -0.43714  | 2.62E-05 |
| cg02348437 | chr2  | Open Sea    | 0.70281522  | 0.268150128 | -0.434665 | 0.000808 |
| cg14020052 | chr2  | Open Sea    | 0.611928445 | 0.179007233 | -0.432921 | 0.035523 |
| cg04512966 | chr2  | Open Sea    | 0.567960639 | 0.148481703 | -0.419479 | 5.56E-07 |
| cg05348875 | chr2  | Open Sea    | 0.82268947  | 0.413670029 | -0.409019 | 0.003775 |

|            |      |             |             |             |           |          |
|------------|------|-------------|-------------|-------------|-----------|----------|
| cg13355542 | chr2 | North Shelf | 0.488835936 | 0.081762002 | -0.407074 | 1.19E-05 |
| cg13734338 | chr2 | Open Sea    | 0.733841162 | 0.32998466  | -0.403857 | 0.039864 |
| cg10648139 | chr2 | South Shore | 0.495730152 | 0.11063333  | -0.385097 | 0.000249 |
| cg13758331 | chr2 | Open Sea    | 0.567783824 | 0.189079412 | -0.378704 | 0.00402  |
| cg18145759 | chr2 | Open Sea    | 0.527328578 | 0.1488776   | -0.378451 | 0.02529  |
| cg05584950 | chr2 | Open Sea    | 0.413269904 | 0.038585294 | -0.374685 | 5.8E-09  |
| cg13359689 | chr2 | Open Sea    | 0.679078823 | 0.309333672 | -0.369745 | 0.011459 |
| cg15552091 | chr2 | Open Sea    | 0.73790856  | 0.368283803 | -0.369625 | 0.03175  |
| cg02743713 | chr2 | South Shore | 0.489544222 | 0.121395021 | -0.368149 | 2.96E-07 |
| cg23008718 | chr2 | Open Sea    | 0.470923555 | 0.103729088 | -0.367194 | 0.000412 |
| cg09305047 | chr2 | Open Sea    | 0.76617758  | 0.400384615 | -0.365793 | 9.29E-08 |
| cg11039476 | chr2 | South Shore | 0.51359361  | 0.148456803 | -0.365137 | 0.03289  |
| cg13303069 | chr2 | Island      | 0.445302247 | 0.083175996 | -0.362126 | 2.98E-07 |
| cg05403316 | chr2 | Open Sea    | 0.562397656 | 0.200528428 | -0.361869 | 0.011485 |
| cg08493294 | chr2 | Island      | 0.467506403 | 0.10807048  | -0.359436 | 0.002047 |
| cg26471497 | chr2 | South Shore | 0.496387813 | 0.139746926 | -0.356641 | 0.025902 |
| cg23725149 | chr2 | Open Sea    | 0.480401998 | 0.127056673 | -0.353345 | 0.004509 |
| cg23482427 | chr2 | Island      | 0.39176532  | 0.042272685 | -0.349493 | 1.1E-06  |
| cg10004780 | chr2 | South Shore | 0.427868241 | 0.082063557 | -0.345805 | 2.22E-07 |
| cg03740612 | chr2 | Open Sea    | 0.736986975 | 0.391703209 | -0.345284 | 0.001119 |
| cg19075787 | chr2 | Open Sea    | 0.46634486  | 0.123747018 | -0.342598 | 0.00052  |
| cg18572413 | chr2 | Island      | 0.402321394 | 0.060069935 | -0.342251 | 8.95E-08 |
| cg01051524 | chr2 | Open Sea    | 0.417574907 | 0.076269033 | -0.341306 | 2.73E-06 |
| cg01572940 | chr2 | South Shore | 0.618735055 | 0.277794237 | -0.340941 | 0.000526 |
| cg00469602 | chr2 | North Shelf | 0.471711141 | 0.130799845 | -0.340911 | 1.14E-05 |
| cg16700364 | chr2 | South Shore | 0.512681757 | 0.172877359 | -0.339804 | 0.02098  |
| cg17939889 | chr2 | Open Sea    | 0.504080408 | 0.169181674 | -0.334899 | 0.03097  |
| cg02598079 | chr2 | North Shelf | 0.539701312 | 0.205887643 | -0.333814 | 0.00557  |
| cg06819718 | chr2 | North Shore | 0.503228844 | 0.169436424 | -0.333792 | 9.09E-06 |
| cg27456468 | chr2 | Island      | 0.424010178 | 0.093519171 | -0.330491 | 0.000458 |
| cg10334703 | chr2 | South Shore | 0.493172713 | 0.163583678 | -0.329589 | 0.004974 |
| cg01586116 | chr2 | Open Sea    | 0.373553611 | 0.047807093 | -0.325747 | 0.000283 |
| cg16228077 | chr2 | Open Sea    | 0.80252385  | 0.483543374 | -0.31898  | 1.29E-08 |
| cg05979400 | chr2 | South Shore | 0.42879406  | 0.110157261 | -0.318637 | 0.000876 |
| cg03646261 | chr2 | North Shore | 0.425782218 | 0.108650272 | -0.317132 | 8.75E-07 |
| cg19753675 | chr2 | North Shore | 0.54248294  | 0.225424126 | -0.317059 | 0.00269  |
| cg06480171 | chr2 | Open Sea    | 0.388905424 | 0.072134364 | -0.316771 | 0.023936 |
| cg01464985 | chr2 | North Shore | 0.395566284 | 0.07883201  | -0.316734 | 1.65E-05 |
| cg09240763 | chr2 | South Shore | 0.43894737  | 0.123370993 | -0.315576 | 0.016848 |
| cg11508714 | chr2 | Open Sea    | 0.360554395 | 0.048928559 | -0.311626 | 1.56E-05 |
| cg01144053 | chr2 | Island      | 0.397800466 | 0.086705076 | -0.311095 | 6.97E-06 |
| cg16955336 | chr2 | Open Sea    | 0.480275321 | 0.170817619 | -0.309458 | 0.012643 |
| cg16248554 | chr2 | Open Sea    | 0.85570739  | 0.546335595 | -0.309372 | 0.001295 |
| cg05703053 | chr2 | Open Sea    | 0.400629225 | 0.095108043 | -0.305521 | 0.004063 |
| cg08363794 | chr2 | Island      | 0.399039734 | 0.096236432 | -0.302803 | 0.000282 |
| cg22647546 | chr2 | North Shore | 0.558243029 | 0.257188061 | -0.301055 | 7.61E-08 |
| cg11036279 | chr2 | North Shore | 0.429580633 | 0.13071776  | -0.298863 | 2.92E-05 |
| cg20668221 | chr2 | Open Sea    | 0.47062424  | 0.17209498  | -0.298529 | 0.001315 |
| cg21068480 | chr2 | Island      | 0.37366837  | 0.076170505 | -0.297498 | 2.62E-05 |
| cg26820636 | chr2 | South Shore | 0.45803697  | 0.166412237 | -0.291625 | 0.000539 |

|            |      |             |             |             |           |          |
|------------|------|-------------|-------------|-------------|-----------|----------|
| cg16179952 | chr2 | Island      | 0.393637191 | 0.102033429 | -0.291604 | 3.19E-08 |
| cg05370101 | chr2 | Open Sea    | 0.359603505 | 0.068328607 | -0.291275 | 0.000403 |
| cg00028211 | chr2 | North Shore | 0.508210579 | 0.21733728  | -0.290873 | 0.001007 |
| cg05847586 | chr2 | Island      | 0.402650343 | 0.111783621 | -0.290867 | 0.010289 |
| cg01472882 | chr2 | Island      | 0.393271893 | 0.104111654 | -0.28916  | 0.000825 |
| cg08402365 | chr2 | Island      | 0.473671256 | 0.188459569 | -0.285212 | 0.003286 |
| cg03190769 | chr2 | North Shore | 0.539175475 | 0.25520091  | -0.283975 | 0.005598 |
| cg01887374 | chr2 | Island      | 0.731091788 | 0.448529642 | -0.282562 | 0.000973 |
| cg07809589 | chr2 | South Shelf | 0.392852719 | 0.115161891 | -0.277691 | 0.002158 |
| cg13293295 | chr2 | Open Sea    | 0.38063219  | 0.104517911 | -0.276114 | 6.14E-06 |
| cg22490454 | chr2 | South Shore | 0.408319233 | 0.13423159  | -0.274088 | 0.000286 |
| cg09287629 | chr2 | Island      | 0.490857477 | 0.216811883 | -0.274046 | 0.042587 |
| cg13354988 | chr2 | Island      | 0.367957216 | 0.094526611 | -0.273431 | 7.87E-05 |
| cg24399924 | chr2 | Island      | 0.346165882 | 0.073605045 | -0.272561 | 3.14E-05 |
| cg12055515 | chr2 | Open Sea    | 0.535765363 | 0.263351678 | -0.272414 | 7.49E-05 |
| cg20838429 | chr2 | Open Sea    | 0.563493524 | 0.292616766 | -0.270877 | 0.023165 |
| cg08347373 | chr2 | North Shore | 0.373466474 | 0.103180195 | -0.270286 | 0.006322 |
| cg12852187 | chr2 | South Shore | 0.509178564 | 0.239763946 | -0.269415 | 0.008323 |
| cg08737338 | chr2 | Open Sea    | 0.698116959 | 0.428729909 | -0.269387 | 0.000137 |
| cg26638505 | chr2 | Island      | 0.394290486 | 0.124966427 | -0.269324 | 0.028282 |
| cg01821161 | chr2 | North Shelf | 0.454477671 | 0.186225098 | -0.268253 | 0.011768 |
| cg03432176 | chr2 | South Shore | 0.341483755 | 0.073278325 | -0.268205 | 0.000118 |
| cg14311362 | chr2 | North Shore | 0.561019016 | 0.293904262 | -0.267115 | 3.12E-06 |
| cg10765212 | chr2 | Open Sea    | 0.380643187 | 0.115356331 | -0.265287 | 0.017357 |
| cg03476109 | chr2 | Open Sea    | 0.430238696 | 0.165202879 | -0.265036 | 0.008709 |
| cg04051697 | chr2 | South Shore | 0.847506892 | 0.582802141 | -0.264705 | 0.000179 |
| cg01383274 | chr2 | Island      | 0.317760111 | 0.053261489 | -0.264499 | 1.56E-05 |
| cg09643312 | chr2 | South Shore | 0.382066417 | 0.118350589 | -0.263716 | 0.024725 |
| cg10982364 | chr2 | Island      | 0.395157351 | 0.132318492 | -0.262839 | 0.000545 |
| cg26874367 | chr2 | Open Sea    | 0.411035888 | 0.148352483 | -0.262683 | 0.003639 |
| cg16472050 | chr2 | North Shore | 0.47476957  | 0.212728234 | -0.262041 | 2.82E-06 |
| cg16764274 | chr2 | South Shore | 0.447643856 | 0.185983835 | -0.26166  | 0.001259 |
| cg08240917 | chr2 | Open Sea    | 0.840977422 | 0.579340765 | -0.261637 | 0.018334 |
| cg22996440 | chr2 | Island      | 0.498842801 | 0.238008599 | -0.260834 | 0.022481 |
| cg19071452 | chr2 | South Shore | 0.501854995 | 0.241230905 | -0.260624 | 0.014199 |
| cg03235479 | chr2 | Open Sea    | 0.382744009 | 0.122915461 | -0.259829 | 0.001414 |
| cg11612266 | chr2 | Island      | 0.41911052  | 0.160302167 | -0.258808 | 0.000766 |
| cg24058732 | chr2 | North Shore | 0.387643412 | 0.128887901 | -0.258756 | 0.005658 |
| cg26143752 | chr2 | South Shore | 0.290263281 | 0.032191254 | -0.258072 | 0.000206 |
| cg27406823 | chr2 | Open Sea    | 0.336419617 | 0.078561555 | -0.257858 | 0.000251 |
| cg06761220 | chr2 | Open Sea    | 0.824237683 | 0.567789698 | -0.256448 | 0.005961 |
| cg15123692 | chr2 | Open Sea    | 0.337285999 | 0.083340082 | -0.253946 | 0.002179 |
| cg15742848 | chr2 | Open Sea    | 0.413822911 | 0.163191462 | -0.250631 | 0.012928 |
| cg04580179 | chr2 | Island      | 0.766646757 | 0.517545956 | -0.249101 | 0.008613 |
| cg24724664 | chr2 | Island      | 0.596067521 | 0.347011147 | -0.249056 | 0.014202 |
| cg23994043 | chr2 | Island      | 0.494951304 | 0.246162512 | -0.248789 | 0.026589 |
| cg24879782 | chr2 | Island      | 0.333685122 | 0.085377612 | -0.248308 | 0.000494 |
| cg01884057 | chr2 | Open Sea    | 0.375656042 | 0.127531178 | -0.248125 | 0.000789 |
| cg12757011 | chr2 | South Shore | 0.45261538  | 0.204625001 | -0.24799  | 0.020821 |
| cg05309280 | chr2 | North Shore | 0.760382499 | 0.512666962 | -0.247716 | 7.75E-07 |

|            |      |             |             |             |           |          |
|------------|------|-------------|-------------|-------------|-----------|----------|
| cg03445244 | chr2 | Open Sea    | 0.821901921 | 0.574916539 | -0.246985 | 4.7E-07  |
| cg02696169 | chr2 | Open Sea    | 0.677008725 | 0.430260744 | -0.246748 | 0.013717 |
| cg21184951 | chr2 | Open Sea    | 0.707851491 | 0.461702202 | -0.246149 | 4.5E-05  |
| cg16635948 | chr2 | Open Sea    | 0.503439317 | 0.257700114 | -0.245739 | 7.81E-05 |
| cg22539420 | chr2 | Island      | 0.383177997 | 0.137492085 | -0.245686 | 0.03776  |
| cg26382586 | chr2 | Island      | 0.574175782 | 0.329058593 | -0.245117 | 4.01E-08 |
| cg17263053 | chr2 | Island      | 0.343968164 | 0.09894192  | -0.245026 | 1.03E-05 |
| cg18921030 | chr2 | Open Sea    | 0.6988832   | 0.454452908 | -0.24443  | 0.013208 |
| cg22197050 | chr2 | Island      | 0.365966199 | 0.122536686 | -0.24343  | 3.64E-05 |
| cg22856324 | chr2 | Island      | 0.382579857 | 0.139249619 | -0.24333  | 0.032732 |
| cg11147193 | chr2 | North Shore | 0.629466214 | 0.38673795  | -0.242728 | 0.035028 |
| cg21829923 | chr2 | Island      | 0.352389238 | 0.109845786 | -0.242543 | 1.16E-05 |
| cg22480783 | chr2 | Open Sea    | 0.294191079 | 0.054680694 | -0.23951  | 0.001055 |
| cg24936500 | chr2 | Island      | 0.339504712 | 0.101084818 | -0.23842  | 0.000112 |
| cg16361302 | chr2 | Island      | 0.342884236 | 0.10548329  | -0.237401 | 0.002082 |
| cg14757738 | chr2 | Open Sea    | 0.318779577 | 0.082723704 | -0.236056 | 0.000979 |
| cg13278353 | chr2 | South Shore | 0.346540391 | 0.113877577 | -0.232663 | 0.045715 |
| cg04253876 | chr2 | Island      | 0.325813468 | 0.093553732 | -0.23226  | 0.00044  |
| cg18786593 | chr2 | South Shore | 0.363014958 | 0.131357111 | -0.231658 | 0.002177 |
| cg00782200 | chr2 | North Shore | 0.401305738 | 0.17089082  | -0.230415 | 0.00225  |
| cg25035485 | chr2 | North Shore | 0.380785437 | 0.150441024 | -0.230344 | 0.004363 |
| cg09935994 | chr2 | Island      | 0.840657264 | 0.611033653 | -0.229624 | 0.028266 |
| cg06283342 | chr2 | Island      | 0.292268431 | 0.06295821  | -0.22931  | 0.000284 |
| cg17321385 | chr2 | North Shore | 0.63457042  | 0.405920758 | -0.22865  | 0.024765 |
| cg09450367 | chr2 | North Shore | 0.267194756 | 0.038819502 | -0.228375 | 3.48E-06 |
| cg14919082 | chr2 | Open Sea    | 0.336068034 | 0.108921372 | -0.227147 | 0.017084 |
| cg25537434 | chr2 | North Shore | 0.312025154 | 0.085048478 | -0.226977 | 0.00237  |
| cg23970275 | chr2 | Open Sea    | 0.312075495 | 0.085138912 | -0.226937 | 0.00029  |
| cg03018058 | chr2 | North Shore | 0.35804144  | 0.131324246 | -0.226717 | 0.005906 |
| cg09715353 | chr2 | Island      | 0.385393355 | 0.159188437 | -0.226205 | 0.020515 |
| cg14965639 | chr2 | Open Sea    | 0.684481829 | 0.458613167 | -0.225869 | 0.000745 |
| cg02365780 | chr2 | South Shore | 0.454602576 | 0.229061929 | -0.225541 | 0.026891 |
| cg15135990 | chr2 | South Shore | 0.850858066 | 0.626105976 | -0.224752 | 1.03E-05 |
| cg00255882 | chr2 | South Shore | 0.398137533 | 0.174320021 | -0.223818 | 0.012085 |
| cg05301866 | chr2 | Island      | 0.469514751 | 0.246408897 | -0.223106 | 0.01544  |
| cg17192247 | chr2 | South Shore | 0.42006463  | 0.197593099 | -0.222472 | 0.029099 |
| cg08690859 | chr2 | Island      | 0.395165342 | 0.173207546 | -0.221958 | 0.000135 |
| cg13176012 | chr2 | Island      | 0.335447004 | 0.115479537 | -0.219967 | 0.026202 |
| cg24206827 | chr2 | Open Sea    | 0.2939026   | 0.074489588 | -0.219413 | 0.000972 |
| cg10658666 | chr2 | Island      | 0.322771536 | 0.103596682 | -0.219175 | 0.000189 |
| cg09453076 | chr2 | Island      | 0.27896342  | 0.060059246 | -0.218904 | 0.023893 |
| cg13231954 | chr2 | South Shore | 0.442880642 | 0.224918878 | -0.217962 | 0.000706 |
| cg22308949 | chr2 | Open Sea    | 0.588844761 | 0.370894587 | -0.21795  | 5.87E-10 |
| cg07014673 | chr2 | Island      | 0.312189359 | 0.094369352 | -0.21782  | 0.001129 |
| cg01396872 | chr2 | North Shore | 0.262915617 | 0.045184005 | -0.217732 | 0.000243 |
| cg17517296 | chr2 | Open Sea    | 0.630750411 | 0.413231867 | -0.217519 | 0.023984 |
| cg16795804 | chr2 | South Shore | 0.355089711 | 0.137710084 | -0.21738  | 0.001344 |
| cg13812393 | chr2 | Open Sea    | 0.600582376 | 0.383283405 | -0.217299 | 0.003976 |
| cg10425361 | chr2 | South Shore | 0.26607007  | 0.050210457 | -0.21586  | 0.001671 |
| cg22412747 | chr2 | Open Sea    | 0.486143871 | 0.271097417 | -0.215046 | 0.015494 |

|            |       |             |             |             |           |          |
|------------|-------|-------------|-------------|-------------|-----------|----------|
| cg00326842 | chr2  | Open Sea    | 0.257067782 | 0.042369154 | -0.214699 | 7.29E-05 |
| cg16725094 | chr2  | North Shore | 0.352638433 | 0.138560158 | -0.214078 | 5.67E-05 |
| cg14499385 | chr2  | South Shore | 0.337817602 | 0.125124446 | -0.212693 | 0.000246 |
| cg13099839 | chr2  | Island      | 0.303533348 | 0.091115907 | -0.212417 | 0.001361 |
| cg19416417 | chr2  | South Shore | 0.309558655 | 0.097320206 | -0.212238 | 0.008261 |
| cg06488443 | chr2  | Island      | 0.284074777 | 0.072113368 | -0.211961 | 0.001417 |
| cg13681655 | chr2  | Open Sea    | 0.751154888 | 0.539746228 | -0.211409 | 0.013847 |
| cg04364261 | chr2  | South Shore | 0.295010309 | 0.083786397 | -0.211224 | 0.000399 |
| cg20706438 | chr2  | South Shore | 0.347355383 | 0.136256609 | -0.211099 | 0.044101 |
| cg01287476 | chr2  | Island      | 0.600392807 | 0.390036934 | -0.210356 | 0.009683 |
| cg09672358 | chr2  | Open Sea    | 0.260508679 | 0.050462451 | -0.210046 | 0.00036  |
| cg13339791 | chr2  | Open Sea    | 0.294989737 | 0.085629017 | -0.209361 | 0.000489 |
| cg20599967 | chr2  | Island      | 0.278985216 | 0.069953834 | -0.209031 | 0.000111 |
| cg14645545 | chr2  | Island      | 0.280427096 | 0.072037811 | -0.208389 | 0.000929 |
| cg23497383 | chr2  | Island      | 0.27323439  | 0.064923746 | -0.208311 | 0.046859 |
| cg12021814 | chr2  | Island      | 0.302627224 | 0.094485054 | -0.208142 | 0.00107  |
| cg15380115 | chr2  | South Shore | 0.818754134 | 0.61132907  | -0.207425 | 0.002771 |
| cg20697464 | chr2  | Open Sea    | 0.423483524 | 0.216422131 | -0.207061 | 0.035206 |
| cg07455789 | chr2  | Open Sea    | 0.318507524 | 0.111671226 | -0.206836 | 0.001637 |
| cg25785397 | chr2  | South Shore | 0.309193273 | 0.102533263 | -0.20666  | 0.027148 |
| cg17253709 | chr2  | Open Sea    | 0.505481365 | 0.29907214  | -0.206409 | 0.000376 |
| cg17360781 | chr2  | Island      | 0.318980723 | 0.114018844 | -0.204962 | 0.002523 |
| cg07875385 | chr2  | Open Sea    | 0.27869377  | 0.074064044 | -0.20463  | 0.012661 |
| cg13220917 | chr2  | North Shore | 0.668510131 | 0.464039805 | -0.20447  | 0.000818 |
| cg12969193 | chr2  | North Shore | 0.34802964  | 0.144123182 | -0.203906 | 0.001379 |
| cg24768561 | chr2  | Island      | 0.596071978 | 0.392255822 | -0.203816 | 0.01327  |
| cg23546474 | chr2  | Island      | 0.307374122 | 0.103866063 | -0.203508 | 0.01398  |
| cg07873848 | chr2  | North Shore | 0.369289254 | 0.166281953 | -0.203007 | 0.007764 |
| cg05136531 | chr2  | South Shore | 0.261121497 | 0.059137443 | -0.201984 | 0.000265 |
| cg25391948 | chr2  | Open Sea    | 0.84481191  | 0.642863021 | -0.201949 | 0.000878 |
| cg04067066 | chr2  | North Shore | 0.481796638 | 0.280003841 | -0.201793 | 0.003485 |
| cg15742777 | chr2  | Open Sea    | 0.491268606 | 0.290849297 | -0.200419 | 9.69E-05 |
| cg06942701 | chr2  | Island      | 0.382095603 | 0.18174247  | -0.200353 | 0.000608 |
| cg04628369 | chr20 | Island      | 0.606056809 | 0.072461951 | -0.533595 | 1.39E-08 |
| cg11988036 | chr20 | Island      | 0.579907701 | 0.065773101 | -0.514135 | 0.00062  |
| cg06793974 | chr20 | Island      | 0.483101943 | 0.065560916 | -0.417541 | 1.64E-09 |
| cg20430047 | chr20 | Open Sea    | 0.688024583 | 0.277484436 | -0.41054  | 6.96E-05 |
| cg26733301 | chr20 | South Shore | 0.486126045 | 0.089752527 | -0.396374 | 6.48E-08 |
| cg26404172 | chr20 | North Shore | 0.454779747 | 0.062982331 | -0.391797 | 2.79E-07 |
| cg11577716 | chr20 | Open Sea    | 0.573709707 | 0.207985831 | -0.365724 | 8.63E-05 |
| cg26267561 | chr20 | Island      | 0.758968083 | 0.394715652 | -0.364252 | 0.035572 |
| cg14424538 | chr20 | Island      | 0.40278993  | 0.040738734 | -0.362051 | 3.04E-06 |
| cg26396492 | chr20 | Open Sea    | 0.480661729 | 0.12550758  | -0.355154 | 0.011674 |
| cg24994127 | chr20 | Island      | 0.614300756 | 0.268759658 | -0.345541 | 0.000165 |
| cg01521397 | chr20 | South Shelf | 0.737646718 | 0.3999537   | -0.337693 | 0.045113 |
| cg01073332 | chr20 | North Shore | 0.475168672 | 0.13849214  | -0.336677 | 1.16E-06 |
| cg17142870 | chr20 | South Shore | 0.656605726 | 0.330644294 | -0.325961 | 3.39E-06 |
| cg06261066 | chr20 | Open Sea    | 0.410122378 | 0.088637497 | -0.321485 | 1.89E-05 |
| cg25948982 | chr20 | Open Sea    | 0.416365311 | 0.097075002 | -0.31929  | 0.000423 |
| cg15815827 | chr20 | South Shelf | 0.534383544 | 0.218335593 | -0.316048 | 0.017911 |

|            |       |             |             |             |           |          |
|------------|-------|-------------|-------------|-------------|-----------|----------|
| cg26234223 | chr20 | North Shore | 0.458926957 | 0.144343905 | -0.314583 | 0.00486  |
| cg08587504 | chr20 | South Shore | 0.819005544 | 0.518761139 | -0.300244 | 0.044532 |
| cg22763649 | chr20 | North Shore | 0.459632079 | 0.161825223 | -0.297807 | 1.42E-06 |
| cg23145794 | chr20 | North Shore | 0.415691589 | 0.118216081 | -0.297476 | 0.019637 |
| cg19391247 | chr20 | Open Sea    | 0.35859362  | 0.072865044 | -0.285729 | 2.54E-05 |
| cg11263351 | chr20 | North Shore | 0.450415563 | 0.16676723  | -0.283648 | 0.046385 |
| cg26232247 | chr20 | Open Sea    | 0.416876996 | 0.134093067 | -0.282784 | 0.001145 |
| cg05355067 | chr20 | North Shelf | 0.889032865 | 0.606848548 | -0.282184 | 0.009985 |
| cg06588605 | chr20 | North Shore | 0.379940817 | 0.098661705 | -0.281279 | 0.013539 |
| cg16547579 | chr20 | Open Sea    | 0.435010339 | 0.156561694 | -0.278449 | 0.002948 |
| cg16178855 | chr20 | Open Sea    | 0.866216137 | 0.593529364 | -0.272687 | 0.008669 |
| cg24182521 | chr20 | South Shore | 0.339474583 | 0.069285996 | -0.270189 | 2.09E-05 |
| cg14801864 | chr20 | Open Sea    | 0.789007952 | 0.520898141 | -0.26811  | 0.008481 |
| cg07333305 | chr20 | Open Sea    | 0.549337688 | 0.291863469 | -0.257474 | 0.002427 |
| cg10555583 | chr20 | Island      | 0.296281715 | 0.041710494 | -0.254571 | 8.11E-05 |
| cg27274542 | chr20 | Island      | 0.503179801 | 0.250552992 | -0.252627 | 0.013769 |
| cg04682802 | chr20 | Open Sea    | 0.360877194 | 0.108894252 | -0.251983 | 0.004028 |
| cg24874350 | chr20 | Island      | 0.413651306 | 0.163553672 | -0.250098 | 0.000367 |
| cg15004136 | chr20 | North Shore | 0.468933544 | 0.219133256 | -0.2498   | 0.001742 |
| cg15821319 | chr20 | North Shore | 0.33192149  | 0.090168484 | -0.241753 | 0.000166 |
| cg04504205 | chr20 | Open Sea    | 0.367756409 | 0.126918392 | -0.240838 | 0.002843 |
| cg02311725 | chr20 | North Shore | 0.407599134 | 0.16691222  | -0.240687 | 7.84E-05 |
| cg21132536 | chr20 | South Shore | 0.379924327 | 0.141074166 | -0.23885  | 0.018635 |
| cg02988798 | chr20 | Island      | 0.410041184 | 0.172010192 | -0.238031 | 0.009397 |
| cg00727912 | chr20 | North Shore | 0.326378424 | 0.089732446 | -0.236646 | 7.59E-05 |
| cg00626515 | chr20 | South Shore | 0.850443591 | 0.617345215 | -0.233098 | 2.52E-09 |
| cg03999872 | chr20 | Island      | 0.340543268 | 0.109020304 | -0.231523 | 0.009744 |
| cg08304608 | chr20 | Open Sea    | 0.814931083 | 0.588649266 | -0.226282 | 0.043896 |
| cg20732137 | chr20 | Open Sea    | 0.904220842 | 0.678577145 | -0.225644 | 0.031212 |
| cg08736638 | chr20 | North Shore | 0.311606022 | 0.088669428 | -0.222937 | 0.00075  |
| cg07549715 | chr20 | North Shelf | 0.674250833 | 0.455531134 | -0.21872  | 9.59E-05 |
| cg00260802 | chr20 | Island      | 0.42434021  | 0.205701449 | -0.218639 | 0.014938 |
| cg10305789 | chr20 | North Shore | 0.266768775 | 0.053081261 | -0.213688 | 0.000276 |
| cg23843505 | chr20 | Island      | 0.302530319 | 0.099751913 | -0.202778 | 0.026669 |
| cg15560495 | chr20 | South Shore | 0.259930147 | 0.059309225 | -0.200621 | 0.000248 |
| cg14081667 | chr21 | Island      | 0.572909367 | 0.037431064 | -0.535478 | 8.1E-10  |
| cg24865779 | chr21 | North Shore | 0.528213859 | 0.054882025 | -0.473332 | 8.01E-08 |
| cg21241823 | chr21 | Open Sea    | 0.565912594 | 0.137740906 | -0.428172 | 2.27E-05 |
| cg02260098 | chr21 | Island      | 0.465606567 | 0.082065132 | -0.383541 | 1.53E-08 |
| cg22212414 | chr21 | North Shore | 0.42945603  | 0.049840952 | -0.379615 | 3.26E-06 |
| cg10572943 | chr21 | North Shore | 0.404455332 | 0.071487362 | -0.332968 | 1.31E-05 |
| cg05973398 | chr21 | Open Sea    | 0.432468969 | 0.161949225 | -0.27052  | 0.029437 |
| cg23163200 | chr21 | Open Sea    | 0.465214342 | 0.200795731 | -0.264419 | 0.004973 |
| cg03803086 | chr21 | Open Sea    | 0.557485833 | 0.293453085 | -0.264033 | 0.013776 |
| cg13524919 | chr21 | Island      | 0.492271679 | 0.245688143 | -0.246584 | 0.001017 |
| cg18069493 | chr21 | South Shore | 0.432121725 | 0.18609748  | -0.246024 | 0.043095 |
| cg14583871 | chr21 | Island      | 0.347908298 | 0.10669449  | -0.241214 | 5E-05    |
| cg25385366 | chr21 | Open Sea    | 0.342318449 | 0.119730184 | -0.222588 | 0.000955 |
| cg15209808 | chr22 | Island      | 0.57786879  | 0.159973803 | -0.417895 | 0.02027  |
| cg15770575 | chr22 | North Shelf | 0.728482754 | 0.322160814 | -0.406322 | 0.002996 |

|            |       |             |             |             |           |          |
|------------|-------|-------------|-------------|-------------|-----------|----------|
| cg01141459 | chr22 | Island      | 0.566396241 | 0.171211039 | -0.395185 | 0.000265 |
| cg05602642 | chr22 | North Shore | 0.564730299 | 0.199182011 | -0.365548 | 0.000377 |
| cg04046669 | chr22 | Island      | 0.424679939 | 0.077674281 | -0.347006 | 1.9E-07  |
| cg23268208 | chr22 | Island      | 0.534907708 | 0.206488886 | -0.328419 | 0.046698 |
| cg14509403 | chr22 | Island      | 0.461782236 | 0.136129662 | -0.325653 | 0.014582 |
| cg26842622 | chr22 | South Shore | 0.501065094 | 0.183382247 | -0.317683 | 7.1E-05  |
| cg27610821 | chr22 | Island      | 0.427983096 | 0.12632498  | -0.301658 | 0.000101 |
| cg10941566 | chr22 | Island      | 0.454845241 | 0.156982439 | -0.297863 | 0.043499 |
| cg20164887 | chr22 | Island      | 0.384566799 | 0.101785757 | -0.282781 | 8.28E-05 |
| cg01383955 | chr22 | Open Sea    | 0.350872651 | 0.06937957  | -0.281493 | 5.14E-06 |
| cg19414598 | chr22 | Island      | 0.344806829 | 0.065273888 | -0.279533 | 0.000265 |
| cg21268578 | chr22 | Open Sea    | 0.336907878 | 0.061380233 | -0.275528 | 0.000128 |
| cg18436500 | chr22 | Island      | 0.623974521 | 0.354212386 | -0.269762 | 0.022448 |
| cg05338724 | chr22 | South Shore | 0.81554438  | 0.552081834 | -0.263463 | 0.043743 |
| cg07264666 | chr22 | Open Sea    | 0.473492981 | 0.213085722 | -0.260407 | 0.007075 |
| cg05329888 | chr22 | Island      | 0.295255144 | 0.039579481 | -0.255676 | 0.000181 |
| cg14983728 | chr22 | North Shore | 0.358110305 | 0.1038269   | -0.254283 | 1.53E-06 |
| cg19582200 | chr22 | North Shelf | 0.614842054 | 0.363509827 | -0.251332 | 0.000492 |
| cg14324805 | chr22 | South Shore | 0.754162097 | 0.506339727 | -0.247822 | 0.010467 |
| cg27098470 | chr22 | Open Sea    | 0.359631869 | 0.112261632 | -0.24737  | 0.0375   |
| cg12511214 | chr22 | Island      | 0.430883099 | 0.185772479 | -0.245111 | 0.017972 |
| cg06516947 | chr22 | Open Sea    | 0.355097363 | 0.111369876 | -0.243727 | 0.000605 |
| cg00539347 | chr22 | Open Sea    | 0.2927094   | 0.05039714  | -0.242312 | 0.000591 |
| cg00308159 | chr22 | Island      | 0.293678161 | 0.053107384 | -0.240571 | 0.001047 |
| cg25246692 | chr22 | Open Sea    | 0.314402325 | 0.089020717 | -0.225382 | 0.001782 |
| cg02948259 | chr22 | North Shore | 0.87574052  | 0.651155722 | -0.224585 | 0.015837 |
| cg23772226 | chr22 | Open Sea    | 0.562439676 | 0.338998587 | -0.223441 | 0.002361 |
| cg12068816 | chr22 | Island      | 0.364673805 | 0.141671743 | -0.223002 | 3.91E-05 |
| cg05389174 | chr22 | Open Sea    | 0.749095062 | 0.526355676 | -0.222739 | 0.017746 |
| cg06268694 | chr22 | Island      | 0.299559909 | 0.079658847 | -0.219901 | 0.003967 |
| cg00930606 | chr22 | North Shore | 0.721078101 | 0.50321766  | -0.21786  | 0.036324 |
| cg11677105 | chr22 | South Shore | 0.428466316 | 0.211394445 | -0.217072 | 0.001553 |
| cg03365751 | chr22 | Open Sea    | 0.302632726 | 0.085564814 | -0.217068 | 0.000103 |
| cg04485799 | chr22 | Island      | 0.331418339 | 0.116503704 | -0.214915 | 0.003025 |
| cg19713460 | chr22 | North Shore | 0.319078722 | 0.10460582  | -0.214473 | 0.000875 |
| cg07059402 | chr22 | North Shore | 0.478975352 | 0.266287947 | -0.212687 | 0.003684 |
| cg13671601 | chr22 | Island      | 0.317820934 | 0.105627761 | -0.212193 | 0.012733 |
| cg11860005 | chr22 | North Shore | 0.312780146 | 0.100990484 | -0.21179  | 0.016022 |
| cg17568996 | chr22 | Open Sea    | 0.249029655 | 0.037582821 | -0.211447 | 0.000106 |
| cg20797203 | chr22 | North Shore | 0.46015631  | 0.250034459 | -0.210122 | 0.002733 |
| cg19764436 | chr22 | Island      | 0.308742277 | 0.10096375  | -0.207779 | 6.76E-05 |
| cg07044422 | chr22 | Open Sea    | 0.453698344 | 0.246073179 | -0.207625 | 0.023054 |
| cg11461302 | chr22 | Open Sea    | 0.67709252  | 0.470764861 | -0.206328 | 0.033304 |
| cg17174023 | chr22 | Island      | 0.277500081 | 0.075026304 | -0.202474 | 0.003103 |
| cg13003054 | chr22 | Island      | 0.298264141 | 0.09610562  | -0.202159 | 0.000768 |
| cg02238178 | chr22 | Open Sea    | 0.294636585 | 0.094014889 | -0.200622 | 0.000152 |
| cg15554421 | chr3  | Open Sea    | 0.672836428 | 0.194129867 | -0.478707 | 0.045729 |
| cg06172942 | chr3  | Island      | 0.476856264 | 0.037441506 | -0.439415 | 1.37E-08 |
| cg08038033 | chr3  | Open Sea    | 0.509887572 | 0.072032232 | -0.437855 | 9.12E-06 |
| cg07475026 | chr3  | Open Sea    | 0.653832921 | 0.21877898  | -0.435054 | 0.0219   |

|            |      |             |             |             |           |          |
|------------|------|-------------|-------------|-------------|-----------|----------|
| cg12198140 | chr3 | Open Sea    | 0.520312461 | 0.08653348  | -0.433779 | 7.14E-09 |
| cg02128651 | chr3 | Island      | 0.46565745  | 0.036826429 | -0.428831 | 1.33E-07 |
| cg11377213 | chr3 | Open Sea    | 0.606955256 | 0.178619718 | -0.428336 | 0.004025 |
| cg03544474 | chr3 | Open Sea    | 0.488974202 | 0.074519071 | -0.414455 | 6.03E-07 |
| cg24859722 | chr3 | Island      | 0.552572309 | 0.14508022  | -0.407492 | 0.014875 |
| cg16924010 | chr3 | South Shelf | 0.661548123 | 0.256456005 | -0.405092 | 0.002503 |
| cg18548864 | chr3 | Open Sea    | 0.590762202 | 0.189449672 | -0.401313 | 0.043348 |
| cg25747192 | chr3 | Island      | 0.426013421 | 0.037023357 | -0.38899  | 5.44E-07 |
| cg21569635 | chr3 | South Shore | 0.458839591 | 0.071065717 | -0.387774 | 9.68E-07 |
| cg04754652 | chr3 | Open Sea    | 0.658465114 | 0.271862566 | -0.386603 | 1.01E-08 |
| cg03670452 | chr3 | Island      | 0.49532031  | 0.11830482  | -0.377015 | 7.75E-05 |
| cg05048976 | chr3 | Island      | 0.459482469 | 0.082709346 | -0.376773 | 1.55E-06 |
| cg07130266 | chr3 | Island      | 0.444765717 | 0.068557487 | -0.376208 | 1.26E-06 |
| cg08047457 | chr3 | Island      | 0.405672148 | 0.03883535  | -0.366837 | 4.66E-07 |
| cg24663845 | chr3 | Open Sea    | 0.725002094 | 0.361372567 | -0.36363  | 0.039755 |
| cg25821785 | chr3 | South Shore | 0.503014643 | 0.147724815 | -0.35529  | 9.47E-05 |
| cg20382675 | chr3 | Open Sea    | 0.647977402 | 0.295367336 | -0.35261  | 1.33E-06 |
| cg05625284 | chr3 | North Shore | 0.769238952 | 0.417412177 | -0.351827 | 0.004246 |
| cg16021018 | chr3 | Open Sea    | 0.42558845  | 0.077708324 | -0.34788  | 1.31E-06 |
| cg08832220 | chr3 | Island      | 0.48356213  | 0.139414269 | -0.344148 | 1.21E-05 |
| cg00777121 | chr3 | Island      | 0.384161778 | 0.042131436 | -0.34203  | 2.76E-07 |
| cg18489755 | chr3 | Open Sea    | 0.840817336 | 0.506073179 | -0.334744 | 0.02623  |
| cg25365006 | chr3 | Open Sea    | 0.814361088 | 0.479856098 | -0.334505 | 0.012221 |
| cg02635726 | chr3 | Open Sea    | 0.364057425 | 0.031660716 | -0.332397 | 1.72E-06 |
| cg26339924 | chr3 | Open Sea    | 0.423072656 | 0.094807104 | -0.328266 | 2.48E-09 |
| cg10798682 | chr3 | Open Sea    | 0.752180414 | 0.425041656 | -0.327139 | 0.010123 |
| cg00718400 | chr3 | North Shore | 0.70821365  | 0.383297491 | -0.324916 | 0.018705 |
| cg09852607 | chr3 | North Shore | 0.46395173  | 0.139059019 | -0.324893 | 0.009506 |
| cg20684180 | chr3 | Island      | 0.382784093 | 0.057990535 | -0.324794 | 6.01E-05 |
| cg12298268 | chr3 | Island      | 0.477410933 | 0.152823558 | -0.324587 | 0.000723 |
| cg23881725 | chr3 | Island      | 0.372549391 | 0.049947631 | -0.322602 | 9.34E-06 |
| cg21554552 | chr3 | Island      | 0.354705946 | 0.034565206 | -0.320141 | 2.55E-05 |
| cg15988232 | chr3 | Island      | 0.710070937 | 0.391505167 | -0.318566 | 0.047689 |
| cg06637517 | chr3 | Open Sea    | 0.382527942 | 0.065838476 | -0.316689 | 6.32E-05 |
| cg01102073 | chr3 | North Shore | 0.479492007 | 0.168409592 | -0.311082 | 0.00438  |
| cg27569446 | chr3 | Island      | 0.348195022 | 0.039037207 | -0.309158 | 1.18E-05 |
| cg13872831 | chr3 | Island      | 0.358907601 | 0.053282857 | -0.305625 | 2.68E-08 |
| cg25736251 | chr3 | North Shore | 0.504687683 | 0.199557234 | -0.30513  | 6.86E-05 |
| cg23199335 | chr3 | Open Sea    | 0.350008017 | 0.050306699 | -0.299701 | 5.7E-05  |
| cg15315056 | chr3 | Open Sea    | 0.364253064 | 0.064898971 | -0.299354 | 1.59E-05 |
| cg04908625 | chr3 | Island      | 0.628524043 | 0.332471728 | -0.296052 | 0.002551 |
| cg18918831 | chr3 | Island      | 0.70248094  | 0.407532799 | -0.294948 | 0.00109  |
| cg04773529 | chr3 | Open Sea    | 0.35048424  | 0.061794856 | -0.288689 | 2.14E-05 |
| cg13799772 | chr3 | Open Sea    | 0.76013933  | 0.473650512 | -0.286489 | 0.019984 |
| cg09678212 | chr3 | Island      | 0.503274896 | 0.21970121  | -0.283574 | 0.000687 |
| cg09596674 | chr3 | Island      | 0.425992123 | 0.143376668 | -0.282615 | 0.042263 |
| cg04289624 | chr3 | Island      | 0.404874408 | 0.129237001 | -0.275637 | 0.000179 |
| cg16957940 | chr3 | Open Sea    | 0.868950562 | 0.593423211 | -0.275527 | 0.015607 |
| cg06570224 | chr3 | Island      | 0.537033742 | 0.265642677 | -0.271391 | 0.011635 |
| cg13071386 | chr3 | Island      | 0.381704762 | 0.11381478  | -0.26789  | 0.000806 |

|            |      |             |             |             |           |          |
|------------|------|-------------|-------------|-------------|-----------|----------|
| cg05371578 | chr3 | Island      | 0.350083586 | 0.083641702 | -0.266442 | 0.002136 |
| cg06201393 | chr3 | North Shore | 0.327478794 | 0.061376945 | -0.266102 | 6.01E-05 |
| cg10935762 | chr3 | North Shelf | 0.445416342 | 0.17980029  | -0.265616 | 0.034061 |
| cg12966367 | chr3 | Island      | 0.305285417 | 0.039802062 | -0.265483 | 4.11E-05 |
| cg00101715 | chr3 | North Shore | 0.360565428 | 0.097957313 | -0.262608 | 0.001379 |
| cg25772723 | chr3 | Island      | 0.423705962 | 0.161728282 | -0.261978 | 0.009702 |
| cg13679679 | chr3 | North Shore | 0.567442219 | 0.30728799  | -0.260154 | 0.005334 |
| cg25486143 | chr3 | Island      | 0.286713768 | 0.026946542 | -0.259767 | 1.96E-05 |
| cg19213703 | chr3 | Open Sea    | 0.74888251  | 0.490897471 | -0.257985 | 0.000286 |
| cg00936626 | chr3 | North Shore | 0.688359537 | 0.430676081 | -0.257683 | 0.040112 |
| cg01406312 | chr3 | Island      | 0.414830714 | 0.157584349 | -0.257246 | 0.000424 |
| cg12598089 | chr3 | North Shore | 0.42011718  | 0.162969327 | -0.257148 | 0.005444 |
| cg15878317 | chr3 | Island      | 0.303721699 | 0.04679414  | -0.256928 | 0.00042  |
| cg18404374 | chr3 | North Shore | 0.387610087 | 0.131788859 | -0.255821 | 0.036013 |
| cg24719910 | chr3 | Open Sea    | 0.780500398 | 0.524819211 | -0.255681 | 0.031763 |
| cg06822689 | chr3 | Island      | 0.299876706 | 0.046869005 | -0.253008 | 0.000219 |
| cg09666573 | chr3 | Open Sea    | 0.369316034 | 0.116645858 | -0.25267  | 6.27E-06 |
| cg06796779 | chr3 | North Shore | 0.420766887 | 0.168117098 | -0.25265  | 0.029043 |
| cg06306198 | chr3 | Island      | 0.34576575  | 0.094230762 | -0.251535 | 0.000442 |
| cg27089226 | chr3 | Open Sea    | 0.32968071  | 0.080443254 | -0.249237 | 1.7E-06  |
| cg22892432 | chr3 | South Shore | 0.809001179 | 0.560309161 | -0.248692 | 0.002855 |
| cg10787919 | chr3 | Open Sea    | 0.353187303 | 0.105798915 | -0.247388 | 0.00111  |
| cg23448486 | chr3 | North Shore | 0.304201923 | 0.057739166 | -0.246463 | 0.000504 |
| cg03277049 | chr3 | Island      | 0.358542376 | 0.112259653 | -0.246283 | 0.001182 |
| cg00217306 | chr3 | Open Sea    | 0.39909815  | 0.152959025 | -0.246139 | 0.002988 |
| cg07771727 | chr3 | Open Sea    | 0.326222063 | 0.080508568 | -0.245713 | 0.02695  |
| cg17571559 | chr3 | Open Sea    | 0.514817192 | 0.270423825 | -0.244393 | 0.016382 |
| cg16180552 | chr3 | South Shore | 0.826607059 | 0.582583731 | -0.244023 | 0.046236 |
| cg24159214 | chr3 | Island      | 0.316792264 | 0.076073701 | -0.240719 | 0.006137 |
| cg22092811 | chr3 | Island      | 0.300916431 | 0.060598507 | -0.240318 | 0.000322 |
| cg05095591 | chr3 | North Shore | 0.294896081 | 0.054965525 | -0.239931 | 0.002262 |
| cg00210994 | chr3 | North Shore | 0.281628514 | 0.042451288 | -0.239177 | 0.002251 |
| cg01601299 | chr3 | North Shore | 0.609444642 | 0.370451984 | -0.238993 | 3.04E-07 |
| cg05141432 | chr3 | South Shore | 0.341605575 | 0.103982897 | -0.237623 | 6.5E-07  |
| cg27642784 | chr3 | North Shore | 0.540654353 | 0.304064945 | -0.236589 | 0.000473 |
| cg13015925 | chr3 | North Shore | 0.338412586 | 0.102801794 | -0.235611 | 0.012821 |
| cg03393017 | chr3 | North Shore | 0.352851197 | 0.118578404 | -0.234273 | 0.006009 |
| cg05700079 | chr3 | North Shore | 0.333294181 | 0.099061521 | -0.234233 | 0.004718 |
| cg07358254 | chr3 | Open Sea    | 0.723623885 | 0.490368554 | -0.233255 | 1.07E-05 |
| cg11145160 | chr3 | Island      | 0.328538901 | 0.095450942 | -0.233088 | 0.003645 |
| cg01178099 | chr3 | Open Sea    | 0.400195504 | 0.16770753  | -0.232488 | 0.016156 |
| cg20042291 | chr3 | South Shore | 0.702090005 | 0.46972234  | -0.232368 | 1.48E-07 |
| cg05057834 | chr3 | South Shore | 0.357435435 | 0.125944755 | -0.231491 | 7.46E-05 |
| cg11883836 | chr3 | Island      | 0.736136202 | 0.506255209 | -0.229881 | 0.000221 |
| cg05662500 | chr3 | Island      | 0.273358996 | 0.044310859 | -0.229048 | 0.001241 |
| cg13907146 | chr3 | Island      | 0.312865972 | 0.084985769 | -0.22788  | 0.000152 |
| cg24851513 | chr3 | Open Sea    | 0.402448379 | 0.175501306 | -0.226947 | 0.001059 |
| cg18337222 | chr3 | South Shore | 0.39452366  | 0.169435261 | -0.225088 | 0.00188  |
| cg17611045 | chr3 | Open Sea    | 0.336235045 | 0.111160768 | -0.225074 | 0.01796  |
| cg21821982 | chr3 | Open Sea    | 0.392956598 | 0.16833768  | -0.224619 | 0.002604 |

|            |      |             |             |             |           |          |
|------------|------|-------------|-------------|-------------|-----------|----------|
| cg03839949 | chr3 | Island      | 0.358713443 | 0.134331348 | -0.224382 | 0.000195 |
| cg15963552 | chr3 | North Shore | 0.268253274 | 0.044285125 | -0.223968 | 0.000438 |
| cg07892374 | chr3 | Open Sea    | 0.39162627  | 0.167712341 | -0.223914 | 0.010123 |
| cg26554505 | chr3 | North Shore | 0.282345599 | 0.058885033 | -0.223461 | 0.000955 |
| cg27423228 | chr3 | South Shore | 0.316635938 | 0.094503383 | -0.222133 | 0.000742 |
| cg17445812 | chr3 | Island      | 0.458654931 | 0.236943792 | -0.221711 | 2.64E-05 |
| cg20096204 | chr3 | North Shore | 0.30553431  | 0.084493887 | -0.22104  | 0.000387 |
| cg13483882 | chr3 | South Shore | 0.389302182 | 0.168291957 | -0.22101  | 0.022402 |
| cg05513806 | chr3 | South Shore | 0.325885534 | 0.105217812 | -0.220668 | 0.000644 |
| cg17293936 | chr3 | Island      | 0.299860594 | 0.079550097 | -0.22031  | 0.001135 |
| cg19245758 | chr3 | North Shore | 0.257676503 | 0.0394828   | -0.218194 | 0.000302 |
| cg18143296 | chr3 | Island      | 0.300052705 | 0.082259377 | -0.217793 | 0.000108 |
| cg01814130 | chr3 | Open Sea    | 0.828259831 | 0.611054553 | -0.217205 | 5.48E-10 |
| cg11165881 | chr3 | North Shore | 0.48575247  | 0.269174775 | -0.216578 | 0.003162 |
| cg16615211 | chr3 | North Shore | 0.315525832 | 0.099971383 | -0.215554 | 0.002104 |
| cg00096328 | chr3 | Open Sea    | 0.546735926 | 0.331887792 | -0.214848 | 0.014496 |
| cg00457403 | chr3 | North Shore | 0.277902816 | 0.064676701 | -0.213226 | 0.00047  |
| cg07852825 | chr3 | Island      | 0.410746443 | 0.197612863 | -0.213134 | 0.011733 |
| cg02241759 | chr3 | North Shore | 0.570778697 | 0.358722149 | -0.212057 | 0.004008 |
| cg00807586 | chr3 | Island      | 0.266959278 | 0.055416597 | -0.211543 | 0.000936 |
| cg02924943 | chr3 | North Shore | 0.262564005 | 0.052166202 | -0.210398 | 0.000782 |
| cg03459811 | chr3 | Open Sea    | 0.783386916 | 0.573346199 | -0.210041 | 0.027444 |
| cg16276063 | chr3 | Open Sea    | 0.31398111  | 0.103992213 | -0.209989 | 0.003412 |
| cg12102181 | chr3 | North Shelf | 0.588223506 | 0.378671569 | -0.209552 | 0.000767 |
| cg06369327 | chr3 | North Shelf | 0.27525738  | 0.065799288 | -0.209458 | 0.000283 |
| cg10627428 | chr3 | South Shore | 0.324936459 | 0.116058829 | -0.208878 | 2.45E-05 |
| cg18998911 | chr3 | Open Sea    | 0.272858666 | 0.064874272 | -0.207984 | 0.000656 |
| cg07581883 | chr3 | North Shore | 0.537288362 | 0.330548668 | -0.20674  | 0.000298 |
| cg14473344 | chr3 | Island      | 0.291643005 | 0.087902142 | -0.203741 | 0.000298 |
| cg03155027 | chr3 | South Shore | 0.492595604 | 0.289665551 | -0.20293  | 0.002274 |
| cg16904330 | chr3 | South Shore | 0.272399276 | 0.06961447  | -0.202785 | 0.002877 |
| cg07891507 | chr3 | South Shore | 0.251604151 | 0.048979987 | -0.202624 | 0.000789 |
| cg17646820 | chr3 | Open Sea    | 0.276488238 | 0.075039024 | -0.201449 | 0.001472 |
| cg08095700 | chr3 | South Shore | 0.366757481 | 0.165623997 | -0.201133 | 0.020858 |
| cg12976582 | chr3 | Island      | 0.458775827 | 0.257849859 | -0.200926 | 0.029065 |
| cg00890363 | chr4 | North Shelf | 0.617377888 | 0.051462769 | -0.565915 | 4.85E-14 |
| cg07816074 | chr4 | Open Sea    | 0.735007782 | 0.185605292 | -0.549402 | 0.00847  |
| cg09354241 | chr4 | North Shelf | 0.59130357  | 0.067711034 | -0.523593 | 1.03E-08 |
| cg03476195 | chr4 | Open Sea    | 0.591522636 | 0.088281345 | -0.503241 | 5.57E-10 |
| cg05658107 | chr4 | Open Sea    | 0.557120337 | 0.112297121 | -0.444823 | 0.002323 |
| cg03967798 | chr4 | Open Sea    | 0.575348858 | 0.134596039 | -0.440753 | 0.005261 |
| cg10531263 | chr4 | Open Sea    | 0.47446625  | 0.04577322  | -0.428693 | 3.91E-09 |
| cg04370174 | chr4 | Open Sea    | 0.620255668 | 0.193229683 | -0.427026 | 3.11E-10 |
| cg20815297 | chr4 | North Shore | 0.519533672 | 0.093741772 | -0.425792 | 4E-12    |
| cg18817990 | chr4 | North Shore | 0.755135766 | 0.348986472 | -0.406149 | 0.043298 |
| cg17805540 | chr4 | Island      | 0.485416508 | 0.083986894 | -0.40143  | 1.04E-06 |
| cg02060584 | chr4 | Open Sea    | 0.531062375 | 0.138516209 | -0.392546 | 0.000161 |
| cg01268541 | chr4 | Open Sea    | 0.475532071 | 0.084101087 | -0.391431 | 1.82E-06 |
| cg00547103 | chr4 | Open Sea    | 0.573498616 | 0.182242619 | -0.391256 | 0.002456 |
| cg24495585 | chr4 | Island      | 0.434132069 | 0.047308532 | -0.386824 | 8.4E-07  |

|            |      |             |             |             |           |          |
|------------|------|-------------|-------------|-------------|-----------|----------|
| cg09160776 | chr4 | Island      | 0.54672542  | 0.162201718 | -0.384524 | 0.006376 |
| cg03215181 | chr4 | South Shore | 0.463693047 | 0.08324383  | -0.380449 | 4.85E-07 |
| cg20332195 | chr4 | South Shore | 0.662644238 | 0.283832928 | -0.378811 | 0.000179 |
| cg15696058 | chr4 | Open Sea    | 0.454652336 | 0.078615473 | -0.376037 | 2.69E-08 |
| cg25243082 | chr4 | Open Sea    | 0.549630797 | 0.174212483 | -0.375418 | 0.023581 |
| cg10574494 | chr4 | South Shore | 0.470611235 | 0.100136515 | -0.370475 | 0.002016 |
| cg26839512 | chr4 | South Shore | 0.443847534 | 0.077911835 | -0.365936 | 9.66E-05 |
| cg17809748 | chr4 | North Shore | 0.440545459 | 0.077722901 | -0.362823 | 1.94E-05 |
| cg04448477 | chr4 | North Shore | 0.469280571 | 0.110701309 | -0.358579 | 1.75E-05 |
| cg17031543 | chr4 | South Shore | 0.441649028 | 0.085990533 | -0.355658 | 5.92E-06 |
| cg16742873 | chr4 | Island      | 0.513037669 | 0.161093308 | -0.351944 | 0.018456 |
| cg15400629 | chr4 | North Shore | 0.523050781 | 0.173969578 | -0.349081 | 0.041026 |
| cg00206356 | chr4 | Island      | 0.450320415 | 0.105767071 | -0.344553 | 2.02E-06 |
| cg04605681 | chr4 | Open Sea    | 0.593280832 | 0.251573664 | -0.341707 | 0.039235 |
| cg27147000 | chr4 | South Shore | 0.424816233 | 0.083673546 | -0.341143 | 1.45E-05 |
| cg24721899 | chr4 | Island      | 0.382975245 | 0.04413261  | -0.338843 | 8.81E-07 |
| cg14326413 | chr4 | North Shore | 0.386082687 | 0.047748496 | -0.338334 | 0.000289 |
| cg09451574 | chr4 | South Shore | 0.719979945 | 0.382785093 | -0.337195 | 6.21E-05 |
| cg05826175 | chr4 | Open Sea    | 0.518617774 | 0.1829891   | -0.335629 | 0.000162 |
| cg05211868 | chr4 | North Shore | 0.489723017 | 0.158282819 | -0.33144  | 0.015606 |
| cg19974227 | chr4 | North Shelf | 0.437277871 | 0.107452453 | -0.329825 | 0.001418 |
| cg02758628 | chr4 | Island      | 0.433193021 | 0.107839093 | -0.325354 | 0.001771 |
| cg21739530 | chr4 | Open Sea    | 0.368196721 | 0.05074095  | -0.317456 | 8.35E-06 |
| cg01610979 | chr4 | Open Sea    | 0.443281935 | 0.129808951 | -0.313473 | 0.017544 |
| cg14343210 | chr4 | Open Sea    | 0.627458896 | 0.314052547 | -0.313406 | 0.00148  |
| cg23874561 | chr4 | Island      | 0.360124167 | 0.047178332 | -0.312946 | 2.94E-05 |
| cg14855874 | chr4 | South Shore | 0.360301427 | 0.050622054 | -0.309679 | 2.4E-05  |
| cg20817902 | chr4 | Island      | 0.340744575 | 0.033200826 | -0.307544 | 0.000512 |
| cg25913520 | chr4 | North Shore | 0.407842502 | 0.100811743 | -0.307031 | 1.65E-05 |
| cg10203211 | chr4 | Island      | 0.469599069 | 0.165505296 | -0.304094 | 0.002471 |
| cg24811290 | chr4 | Open Sea    | 0.343252218 | 0.041540581 | -0.301712 | 3.76E-06 |
| cg09062218 | chr4 | Open Sea    | 0.677047931 | 0.377520795 | -0.299527 | 0.00116  |
| cg21279601 | chr4 | North Shore | 0.666494121 | 0.367331677 | -0.299162 | 0.030227 |
| cg16565913 | chr4 | Island      | 0.377755344 | 0.07939148  | -0.298364 | 4.44E-05 |
| cg18489994 | chr4 | Open Sea    | 0.489926989 | 0.191602058 | -0.298325 | 0.020399 |
| cg05974274 | chr4 | North Shore | 0.336596907 | 0.038556708 | -0.29804  | 0.000735 |
| cg15556886 | chr4 | North Shore | 0.368114563 | 0.070418888 | -0.297696 | 0.001284 |
| cg15555527 | chr4 | Island      | 0.70414255  | 0.410117606 | -0.294025 | 0.032835 |
| cg26796245 | chr4 | Open Sea    | 0.419094856 | 0.125510763 | -0.293584 | 0.000686 |
| cg22839308 | chr4 | Open Sea    | 0.349577735 | 0.056317348 | -0.29326  | 0.00029  |
| cg24973755 | chr4 | Island      | 0.767581337 | 0.475927258 | -0.291654 | 0.020139 |
| cg20128928 | chr4 | Island      | 0.503082408 | 0.213808799 | -0.289274 | 0.011431 |
| cg24586554 | chr4 | Open Sea    | 0.706490454 | 0.417400148 | -0.28909  | 0.000194 |
| cg23109968 | chr4 | Open Sea    | 0.374738665 | 0.08584273  | -0.288896 | 2.2E-06  |
| cg12426146 | chr4 | Island      | 0.530024476 | 0.242102257 | -0.287922 | 0.021966 |
| cg15137566 | chr4 | Island      | 0.355910799 | 0.070827367 | -0.285083 | 7.39E-05 |
| cg10800833 | chr4 | Island      | 0.346571022 | 0.061705068 | -0.284866 | 0.000164 |
| cg24881973 | chr4 | South Shore | 0.576330445 | 0.291656305 | -0.284674 | 1.05E-05 |
| cg23995914 | chr4 | Island      | 0.444023715 | 0.159426688 | -0.284597 | 0.000231 |
| cg21480264 | chr4 | Open Sea    | 0.724866017 | 0.440447003 | -0.284419 | 6.04E-07 |

|            |      |             |             |             |           |          |
|------------|------|-------------|-------------|-------------|-----------|----------|
| cg25216704 | chr4 | North Shore | 0.429006849 | 0.149396177 | -0.279611 | 0.005199 |
| cg04300684 | chr4 | South Shore | 0.688480442 | 0.415239317 | -0.273241 | 1.17E-05 |
| cg22681784 | chr4 | North Shore | 0.421203213 | 0.148398242 | -0.272805 | 0.00228  |
| cg23550826 | chr4 | North Shore | 0.385994477 | 0.114628251 | -0.271366 | 0.019818 |
| cg21026199 | chr4 | Open Sea    | 0.57180553  | 0.301014908 | -0.270791 | 0.00549  |
| cg24024036 | chr4 | Open Sea    | 0.761047855 | 0.492884705 | -0.268163 | 0.000413 |
| cg25982657 | chr4 | Open Sea    | 0.395764594 | 0.128269783 | -0.267495 | 0.022106 |
| cg12654519 | chr4 | Open Sea    | 0.42755564  | 0.160400347 | -0.267155 | 0.001739 |
| cg08757862 | chr4 | Open Sea    | 0.397092356 | 0.130640203 | -0.266452 | 0.015619 |
| cg14959746 | chr4 | Open Sea    | 0.327892967 | 0.061825623 | -0.266067 | 0.000179 |
| cg03304437 | chr4 | Open Sea    | 0.332105705 | 0.067735437 | -0.26437  | 2.5E-05  |
| cg00262446 | chr4 | Open Sea    | 0.374298636 | 0.110393286 | -0.263905 | 7.54E-05 |
| cg20435896 | chr4 | South Shore | 0.572424288 | 0.309012142 | -0.263412 | 0.004033 |
| cg08722675 | chr4 | Open Sea    | 0.567817327 | 0.304527002 | -0.26329  | 0.00576  |
| cg15233074 | chr4 | Open Sea    | 0.395756859 | 0.133412651 | -0.262344 | 0.00864  |
| cg26456223 | chr4 | North Shelf | 0.526857038 | 0.265769904 | -0.261087 | 0.018903 |
| cg09921821 | chr4 | North Shelf | 0.293665661 | 0.034468646 | -0.259197 | 7.37E-05 |
| cg00875805 | chr4 | Island      | 0.309206582 | 0.053920195 | -0.255286 | 0.000129 |
| cg11363527 | chr4 | Open Sea    | 0.377535249 | 0.124624543 | -0.252911 | 0.000504 |
| cg14144025 | chr4 | North Shore | 0.465815703 | 0.215704473 | -0.250111 | 0.045049 |
| cg20762861 | chr4 | North Shore | 0.350831344 | 0.102613206 | -0.248218 | 9.19E-06 |
| cg08954277 | chr4 | South Shore | 0.486264426 | 0.242724668 | -0.24354  | 0.04673  |
| cg02525719 | chr4 | North Shore | 0.813144539 | 0.574120392 | -0.239024 | 0.003682 |
| cg07324010 | chr4 | Open Sea    | 0.82312813  | 0.586326466 | -0.236802 | 0.00093  |
| cg03852670 | chr4 | North Shore | 0.393514755 | 0.160193288 | -0.233321 | 0.003225 |
| cg11511795 | chr4 | South Shore | 0.360068406 | 0.127494658 | -0.232574 | 0.000794 |
| cg04748223 | chr4 | Island      | 0.609854453 | 0.377968605 | -0.231886 | 0.001437 |
| cg25023994 | chr4 | North Shore | 0.306547382 | 0.075877654 | -0.23067  | 0.000122 |
| cg02379560 | chr4 | South Shore | 0.340704968 | 0.110953376 | -0.229752 | 0.000969 |
| cg25097497 | chr4 | Island      | 0.301290759 | 0.072076744 | -0.229214 | 0.000576 |
| cg02096793 | chr4 | South Shore | 0.313769301 | 0.085087212 | -0.228682 | 8.28E-05 |
| cg25530661 | chr4 | Open Sea    | 0.319330954 | 0.091649107 | -0.227682 | 4.33E-05 |
| cg04105342 | chr4 | Island      | 0.386861319 | 0.159722095 | -0.227139 | 2.29E-05 |
| cg24690709 | chr4 | Open Sea    | 0.665115233 | 0.438744501 | -0.226371 | 0.014759 |
| cg03033111 | chr4 | North Shore | 0.735100765 | 0.508755863 | -0.226345 | 0.026452 |
| cg24054700 | chr4 | Open Sea    | 0.793136687 | 0.56904294  | -0.224094 | 1.3E-07  |
| cg17214107 | chr4 | North Shore | 0.343379197 | 0.119892834 | -0.223486 | 0.001452 |
| cg13877631 | chr4 | Open Sea    | 0.307629457 | 0.084691731 | -0.222938 | 0.000535 |
| cg12073319 | chr4 | Open Sea    | 0.29420815  | 0.073077572 | -0.221131 | 2.43E-05 |
| cg14197071 | chr4 | Island      | 0.878032559 | 0.657919392 | -0.220113 | 0.017589 |
| cg06485940 | chr4 | South Shore | 0.380019717 | 0.161522819 | -0.218497 | 0.001012 |
| cg00918522 | chr4 | North Shelf | 0.270762438 | 0.055265953 | -0.215496 | 0.000667 |
| cg01664241 | chr4 | South Shore | 0.28408052  | 0.069606957 | -0.214474 | 0.00902  |
| cg16295725 | chr4 | Island      | 0.266325257 | 0.052280243 | -0.214045 | 0.001067 |
| cg10713589 | chr4 | Open Sea    | 0.421159303 | 0.207137444 | -0.214022 | 0.041354 |
| cg10242602 | chr4 | Island      | 0.291863373 | 0.078891958 | -0.212971 | 0.000258 |
| cg25976440 | chr4 | Open Sea    | 0.296050489 | 0.083418416 | -0.212632 | 0.001695 |
| cg24136314 | chr4 | Open Sea    | 0.454253293 | 0.24267401  | -0.211579 | 0.006504 |
| cg27111250 | chr4 | South Shore | 0.708467657 | 0.497668495 | -0.210799 | 0.046465 |
| cg23939001 | chr4 | Island      | 0.733740651 | 0.52315775  | -0.210583 | 0.040303 |

|            |      |             |             |             |           |          |
|------------|------|-------------|-------------|-------------|-----------|----------|
| cg01347682 | chr4 | Island      | 0.249655797 | 0.039245843 | -0.21041  | 0.000161 |
| cg04714787 | chr4 | South Shelf | 0.319029691 | 0.110607235 | -0.208422 | 0.011197 |
| cg12556802 | chr4 | Open Sea    | 0.855349375 | 0.648194356 | -0.207155 | 0.033838 |
| cg16364495 | chr4 | South Shore | 0.265729037 | 0.059671268 | -0.206058 | 0.005654 |
| cg06074123 | chr4 | South Shore | 0.859548454 | 0.654777407 | -0.204771 | 0.023954 |
| cg18533282 | chr4 | Island      | 0.260024014 | 0.057353448 | -0.202671 | 0.000308 |
| cg09122442 | chr4 | Open Sea    | 0.41125417  | 0.208803931 | -0.20245  | 0.027298 |
| cg20588069 | chr4 | North Shore | 0.453928626 | 0.252297088 | -0.201632 | 0.036183 |
| cg14480507 | chr4 | Open Sea    | 0.286502659 | 0.085688581 | -0.200814 | 0.00088  |
| cg26389330 | chr5 | Open Sea    | 0.676715697 | 0.103262163 | -0.573454 | 5.99E-05 |
| cg21546155 | chr5 | Open Sea    | 0.588921981 | 0.071777073 | -0.517145 | 1.78E-10 |
| cg03807298 | chr5 | Island      | 0.58592455  | 0.082062355 | -0.503862 | 2.57E-07 |
| cg09844976 | chr5 | Open Sea    | 0.596326946 | 0.094336811 | -0.50199  | 7.52E-09 |
| cg21545862 | chr5 | Island      | 0.574852514 | 0.106377862 | -0.468475 | 2.92E-05 |
| cg02331883 | chr5 | North Shore | 0.589850566 | 0.126888751 | -0.462962 | 1.39E-07 |
| cg03547840 | chr5 | Island      | 0.564319554 | 0.10912793  | -0.455192 | 1.76E-07 |
| cg22052143 | chr5 | Open Sea    | 0.688363871 | 0.242921849 | -0.445442 | 0.040275 |
| cg09067459 | chr5 | Open Sea    | 0.536408592 | 0.093427098 | -0.442981 | 1.32E-07 |
| cg22855900 | chr5 | Island      | 0.557614368 | 0.128097244 | -0.429517 | 9.62E-07 |
| cg11316131 | chr5 | South Shore | 0.52875868  | 0.104116139 | -0.424643 | 0.000228 |
| cg15712777 | chr5 | Open Sea    | 0.557410806 | 0.136764152 | -0.420647 | 0.000464 |
| cg05672912 | chr5 | Open Sea    | 0.483080776 | 0.066428403 | -0.416652 | 3.62E-07 |
| cg26620356 | chr5 | South Shore | 0.552908132 | 0.157515369 | -0.395393 | 0.043678 |
| cg06884199 | chr5 | Open Sea    | 0.469532642 | 0.075862859 | -0.39367  | 1.2E-06  |
| cg25125298 | chr5 | Open Sea    | 0.572002021 | 0.179097633 | -0.392904 | 0.0278   |
| cg23713079 | chr5 | Island      | 0.453069206 | 0.062217418 | -0.390852 | 2.41E-06 |
| cg16361890 | chr5 | North Shelf | 0.545433434 | 0.156674722 | -0.388759 | 0.003532 |
| cg09731996 | chr5 | Island      | 0.530873177 | 0.147303826 | -0.383569 | 0.000235 |
| cg06711306 | chr5 | Open Sea    | 0.45646865  | 0.075565517 | -0.380903 | 0.000159 |
| cg08155325 | chr5 | North Shore | 0.720051312 | 0.340225601 | -0.379826 | 0.017988 |
| cg19431274 | chr5 | North Shore | 0.699656122 | 0.322877998 | -0.376778 | 0.002115 |
| cg24628744 | chr5 | South Shore | 0.50055131  | 0.137880116 | -0.362671 | 0.019292 |
| cg13001963 | chr5 | Open Sea    | 0.481562997 | 0.122555385 | -0.359008 | 0.026    |
| cg04728482 | chr5 | Island      | 0.432372157 | 0.07558799  | -0.356784 | 3.95E-06 |
| cg20684197 | chr5 | Open Sea    | 0.748773739 | 0.397269607 | -0.351504 | 0.007945 |
| cg02061173 | chr5 | North Shore | 0.630850777 | 0.279503771 | -0.351347 | 0.00042  |
| cg15690342 | chr5 | Island      | 0.425662375 | 0.075989439 | -0.349673 | 1.13E-05 |
| cg01288724 | chr5 | Open Sea    | 0.53189629  | 0.183004681 | -0.348892 | 0.011995 |
| cg26446499 | chr5 | North Shore | 0.445518499 | 0.097921521 | -0.347597 | 2.35E-07 |
| cg25233672 | chr5 | Open Sea    | 0.531411817 | 0.186091207 | -0.345321 | 1.02E-06 |
| cg16198692 | chr5 | South Shore | 0.555021703 | 0.214766433 | -0.340255 | 0.033055 |
| cg16316394 | chr5 | North Shore | 0.679040369 | 0.339429455 | -0.339611 | 0.042787 |
| cg15613420 | chr5 | South Shore | 0.445472599 | 0.112922118 | -0.33255  | 1.31E-05 |
| cg21877464 | chr5 | Open Sea    | 0.641684904 | 0.309635089 | -0.33205  | 0.006666 |
| cg02682520 | chr5 | Open Sea    | 0.394798267 | 0.064054694 | -0.330744 | 1.69E-08 |
| cg00373499 | chr5 | North Shore | 0.48267312  | 0.152006448 | -0.330667 | 0.012958 |
| cg01310120 | chr5 | Open Sea    | 0.405325567 | 0.077575817 | -0.32775  | 9.5E-07  |
| cg15557878 | chr5 | North Shelf | 0.399978859 | 0.072610818 | -0.327368 | 1.2E-05  |
| cg24866363 | chr5 | Open Sea    | 0.456987306 | 0.129990722 | -0.326997 | 5.96E-05 |
| cg01141339 | chr5 | South Shore | 0.479261095 | 0.154216423 | -0.325045 | 0.027799 |

|            |      |             |             |             |           |          |
|------------|------|-------------|-------------|-------------|-----------|----------|
| cg07137934 | chr5 | South Shore | 0.405953051 | 0.082071169 | -0.323882 | 4.84E-06 |
| cg22108469 | chr5 | Island      | 0.50785188  | 0.184727223 | -0.323125 | 0.011188 |
| cg07708521 | chr5 | North Shore | 0.817268666 | 0.499842199 | -0.317426 | 0.038804 |
| cg17777432 | chr5 | Island      | 0.411496869 | 0.097372483 | -0.314124 | 0.000136 |
| cg15609272 | chr5 | Open Sea    | 0.386203788 | 0.07617043  | -0.310033 | 0.001202 |
| cg23514016 | chr5 | Open Sea    | 0.453859245 | 0.145427974 | -0.308431 | 0.007888 |
| cg25923609 | chr5 | Island      | 0.469350114 | 0.161732526 | -0.307618 | 0.018641 |
| cg09550809 | chr5 | Open Sea    | 0.59108232  | 0.285147009 | -0.305935 | 0.030897 |
| cg02520281 | chr5 | North Shore | 0.633286631 | 0.329144533 | -0.304142 | 0.001135 |
| cg23445461 | chr5 | Island      | 0.413898172 | 0.110199458 | -0.303699 | 0.008519 |
| cg18358723 | chr5 | North Shore | 0.459104554 | 0.156164824 | -0.30294  | 0.004267 |
| cg21166964 | chr5 | Island      | 0.431092235 | 0.130693372 | -0.300399 | 4.39E-06 |
| cg11214757 | chr5 | Island      | 0.352512901 | 0.05307273  | -0.29944  | 1.09E-05 |
| cg11625005 | chr5 | Island      | 0.456472666 | 0.158445729 | -0.298027 | 0.004209 |
| cg21915313 | chr5 | Island      | 0.606881724 | 0.31146465  | -0.295417 | 6.1E-05  |
| cg02760293 | chr5 | South Shore | 0.452123955 | 0.156733743 | -0.29539  | 5.69E-06 |
| cg05890484 | chr5 | Open Sea    | 0.392822715 | 0.097568919 | -0.295254 | 2.58E-06 |
| cg26890354 | chr5 | North Shore | 0.491152973 | 0.196543399 | -0.29461  | 2.5E-05  |
| cg21122370 | chr5 | South Shore | 0.406069024 | 0.112120241 | -0.293949 | 0.000892 |
| cg02601475 | chr5 | Open Sea    | 0.504660039 | 0.216275581 | -0.288384 | 0.022596 |
| cg00064778 | chr5 | North Shore | 0.374377473 | 0.086084741 | -0.288293 | 8.26E-05 |
| cg08292467 | chr5 | South Shelf | 0.548998979 | 0.261002121 | -0.287997 | 0.015962 |
| cg17630392 | chr5 | Island      | 0.367126832 | 0.079265359 | -0.287861 | 2.09E-06 |
| cg05832593 | chr5 | North Shore | 0.606242455 | 0.321989371 | -0.284253 | 0.000262 |
| cg21158502 | chr5 | North Shore | 0.359253604 | 0.076009004 | -0.283245 | 1.26E-05 |
| cg16940012 | chr5 | Island      | 0.555507946 | 0.273056178 | -0.282452 | 4.72E-07 |
| cg02319354 | chr5 | South Shore | 0.456822886 | 0.17568662  | -0.281136 | 0.006995 |
| cg09697696 | chr5 | South Shore | 0.413299062 | 0.132236922 | -0.281062 | 0.002111 |
| cg27054655 | chr5 | South Shore | 0.652228867 | 0.372604791 | -0.279624 | 0.006978 |
| cg17373554 | chr5 | Island      | 0.316670357 | 0.04063311  | -0.276037 | 5.04E-06 |
| cg26721877 | chr5 | Island      | 0.382601981 | 0.106611147 | -0.275991 | 0.003092 |
| cg08726298 | chr5 | Open Sea    | 0.334245973 | 0.060841619 | -0.273404 | 0.000351 |
| cg09830083 | chr5 | North Shelf | 0.748382447 | 0.475010943 | -0.273372 | 0.042239 |
| cg03285577 | chr5 | North Shore | 0.360043532 | 0.087725837 | -0.272318 | 3.42E-07 |
| cg16055106 | chr5 | Open Sea    | 0.821697093 | 0.549576876 | -0.27212  | 0.047322 |
| cg21117330 | chr5 | North Shore | 0.5705725   | 0.298518704 | -0.272054 | 0.015767 |
| cg11341199 | chr5 | South Shore | 0.387250981 | 0.119764895 | -0.267486 | 0.000195 |
| cg11382082 | chr5 | North Shore | 0.500059109 | 0.232630344 | -0.267429 | 0.01626  |
| cg03811629 | chr5 | Island      | 0.424469997 | 0.159440773 | -0.265029 | 0.035391 |
| cg08978092 | chr5 | Open Sea    | 0.668284876 | 0.405148209 | -0.263137 | 0.011486 |
| cg15919431 | chr5 | Open Sea    | 0.452009955 | 0.18980228  | -0.262208 | 0.000294 |
| cg26947766 | chr5 | Open Sea    | 0.341320864 | 0.080575666 | -0.260745 | 3.93E-05 |
| cg06575035 | chr5 | Island      | 0.667168412 | 0.40732696  | -0.259841 | 0.012501 |
| cg12408990 | chr5 | Island      | 0.656079014 | 0.398659676 | -0.257419 | 0.001307 |
| cg18058747 | chr5 | Open Sea    | 0.331494617 | 0.074340618 | -0.257154 | 4.77E-05 |
| cg06048354 | chr5 | North Shore | 0.357852487 | 0.101284823 | -0.256568 | 0.005493 |
| cg00997655 | chr5 | North Shore | 0.710168362 | 0.454920123 | -0.255248 | 7.91E-06 |
| cg12200124 | chr5 | North Shore | 0.306892516 | 0.051792653 | -0.2551   | 5.25E-05 |
| cg14049990 | chr5 | Open Sea    | 0.663667218 | 0.408636678 | -0.255031 | 8.03E-05 |
| cg16365064 | chr5 | Open Sea    | 0.617915778 | 0.363577858 | -0.254338 | 0.001682 |

|            |      |             |             |             |           |          |
|------------|------|-------------|-------------|-------------|-----------|----------|
| cg20406460 | chr5 | Island      | 0.339883229 | 0.087397748 | -0.252485 | 0.000685 |
| cg04988443 | chr5 | Open Sea    | 0.702876798 | 0.450953151 | -0.251924 | 0.003208 |
| cg09002358 | chr5 | Open Sea    | 0.73664658  | 0.485350697 | -0.251296 | 0.010044 |
| cg07613945 | chr5 | North Shore | 0.490363423 | 0.239178488 | -0.251185 | 0.002621 |
| cg08103144 | chr5 | Island      | 0.801702153 | 0.554843724 | -0.246858 | 0.004528 |
| cg18054674 | chr5 | North Shore | 0.722493935 | 0.476609326 | -0.245885 | 0.001909 |
| cg05221748 | chr5 | Open Sea    | 0.318908021 | 0.074458031 | -0.24445  | 0.00025  |
| cg01495509 | chr5 | Open Sea    | 0.311889259 | 0.068560595 | -0.243329 | 0.000114 |
| cg23910341 | chr5 | Open Sea    | 0.671196523 | 0.428136165 | -0.24306  | 0.020802 |
| cg20417500 | chr5 | Open Sea    | 0.409423588 | 0.166793603 | -0.24263  | 6.69E-06 |
| cg18794976 | chr5 | Open Sea    | 0.662365533 | 0.420130021 | -0.242236 | 6.67E-05 |
| cg14527110 | chr5 | North Shore | 0.37164535  | 0.129494002 | -0.242151 | 0.049442 |
| cg22929787 | chr5 | South Shore | 0.58105197  | 0.339111195 | -0.241941 | 0.041113 |
| cg01256674 | chr5 | South Shore | 0.289998001 | 0.048971395 | -0.241027 | 5.75E-05 |
| cg11014124 | chr5 | South Shelf | 0.423595583 | 0.18310996  | -0.240486 | 0.000431 |
| cg08452061 | chr5 | South Shore | 0.290368998 | 0.050145403 | -0.240224 | 0.000883 |
| cg04141796 | chr5 | North Shore | 0.315784542 | 0.077655522 | -0.238129 | 0.001802 |
| cg18781988 | chr5 | Island      | 0.326672411 | 0.090670727 | -0.236002 | 0.001354 |
| cg15949044 | chr5 | Island      | 0.363235276 | 0.128827648 | -0.234408 | 0.000407 |
| cg23222488 | chr5 | North Shelf | 0.724304133 | 0.490490918 | -0.233813 | 0.000129 |
| cg24615189 | chr5 | Open Sea    | 0.327176428 | 0.093513893 | -0.233663 | 0.00129  |
| cg19037350 | chr5 | North Shore | 0.522551097 | 0.288982954 | -0.233568 | 1.76E-05 |
| cg05469346 | chr5 | Open Sea    | 0.278711767 | 0.045904297 | -0.232807 | 7.29E-05 |
| cg10476773 | chr5 | Island      | 0.43320815  | 0.201929716 | -0.231278 | 0.035895 |
| cg24718827 | chr5 | Island      | 0.470786537 | 0.240251576 | -0.230535 | 0.001671 |
| cg20541456 | chr5 | South Shelf | 0.312005475 | 0.082222577 | -0.229783 | 0.020805 |
| cg10483275 | chr5 | Open Sea    | 0.713501015 | 0.484917717 | -0.228583 | 0.017988 |
| cg07539798 | chr5 | Island      | 0.579685797 | 0.355292151 | -0.224394 | 0.041393 |
| cg01610165 | chr5 | Open Sea    | 0.325952394 | 0.102347741 | -0.223605 | 0.000735 |
| cg20400589 | chr5 | Open Sea    | 0.723269289 | 0.50048751  | -0.222782 | 5.81E-05 |
| cg09900986 | chr5 | Island      | 0.898548502 | 0.676415873 | -0.222133 | 1.64E-05 |
| cg18750738 | chr5 | Island      | 0.270499199 | 0.048647699 | -0.221852 | 0.000545 |
| cg08412537 | chr5 | North Shelf | 0.608282557 | 0.387203861 | -0.221079 | 0.009367 |
| cg24951286 | chr5 | North Shore | 0.317795645 | 0.096906757 | -0.220889 | 0.000873 |
| cg12959820 | chr5 | South Shore | 0.698678932 | 0.477887427 | -0.220792 | 0.01525  |
| cg10584805 | chr5 | Open Sea    | 0.331941504 | 0.111174675 | -0.220767 | 0.014877 |
| cg18275316 | chr5 | Island      | 0.391365661 | 0.171131739 | -0.220234 | 0.011604 |
| cg08239858 | chr5 | Island      | 0.343283006 | 0.123883319 | -0.2194   | 2.04E-05 |
| cg15874877 | chr5 | North Shore | 0.722691142 | 0.504046739 | -0.218644 | 0.007381 |
| cg12905935 | chr5 | South Shelf | 0.696074413 | 0.478119642 | -0.217955 | 0.001407 |
| cg14956201 | chr5 | Open Sea    | 0.709990778 | 0.49406015  | -0.215931 | 1.04E-05 |
| cg05162564 | chr5 | North Shore | 0.427386248 | 0.212782227 | -0.214604 | 0.01963  |
| cg04451736 | chr5 | Island      | 0.381132526 | 0.167149441 | -0.213983 | 0.034958 |
| cg26627769 | chr5 | North Shore | 0.448590338 | 0.235942828 | -0.212648 | 0.002156 |
| cg24330204 | chr5 | North Shore | 0.287276436 | 0.074884455 | -0.212392 | 0.000682 |
| cg18100702 | chr5 | Island      | 0.312909861 | 0.101024061 | -0.211886 | 2.15E-05 |
| cg11245681 | chr5 | North Shelf | 0.488590633 | 0.277189838 | -0.211401 | 0.020885 |
| cg07231479 | chr5 | Island      | 0.551423205 | 0.340405868 | -0.211017 | 0.016694 |
| cg22175873 | chr5 | North Shore | 0.491925071 | 0.281260557 | -0.210665 | 0.005842 |
| cg27379109 | chr5 | Island      | 0.319944721 | 0.109396555 | -0.210548 | 0.002564 |

|            |      |             |             |             |           |          |
|------------|------|-------------|-------------|-------------|-----------|----------|
| cg11217865 | chr5 | North Shore | 0.345131396 | 0.134669711 | -0.210462 | 0.004155 |
| cg25388800 | chr5 | Open Sea    | 0.270992982 | 0.060869191 | -0.210124 | 0.000193 |
| cg11668813 | chr5 | Open Sea    | 0.305239605 | 0.096106752 | -0.209133 | 0.004133 |
| cg03619352 | chr5 | North Shelf | 0.28965317  | 0.081002807 | -0.20865  | 0.00326  |
| cg22659676 | chr5 | Island      | 0.397276748 | 0.188781734 | -0.208495 | 0.047073 |
| cg27090784 | chr5 | Open Sea    | 0.611548747 | 0.40305757  | -0.208491 | 3.17E-06 |
| cg05657254 | chr5 | Open Sea    | 0.776771203 | 0.569173754 | -0.207597 | 0.044451 |
| cg08271852 | chr5 | Open Sea    | 0.673262052 | 0.46594276  | -0.207319 | 0.031702 |
| cg05692123 | chr5 | Open Sea    | 0.29853494  | 0.091658239 | -0.206877 | 0.004794 |
| cg22051146 | chr5 | Open Sea    | 0.502374198 | 0.295994228 | -0.20638  | 0.042065 |
| cg26277754 | chr5 | Open Sea    | 0.296684807 | 0.090710031 | -0.205975 | 0.007026 |
| cg07254032 | chr5 | Island      | 0.311574721 | 0.106142112 | -0.205433 | 1.84E-07 |
| cg07755752 | chr5 | Open Sea    | 0.693166307 | 0.488393596 | -0.204773 | 0.001584 |
| cg07958387 | chr5 | Island      | 0.498442658 | 0.293916587 | -0.204526 | 0.002593 |
| cg02750098 | chr5 | Island      | 0.286605737 | 0.082336768 | -0.204269 | 0.012139 |
| cg00808170 | chr5 | Island      | 0.641390103 | 0.438097409 | -0.203293 | 0.036256 |
| cg14544666 | chr5 | Island      | 0.33886378  | 0.135764925 | -0.203099 | 0.002262 |
| cg07644368 | chr5 | South Shore | 0.282669494 | 0.07987344  | -0.202796 | 0.028787 |
| cg04461228 | chr5 | Island      | 0.271990718 | 0.069204    | -0.202787 | 0.002099 |
| cg07765621 | chr5 | South Shore | 0.272863411 | 0.070229952 | -0.202633 | 0.031937 |
| cg09048251 | chr5 | Island      | 0.246701465 | 0.044524737 | -0.202177 | 0.000192 |
| cg08466792 | chr5 | South Shore | 0.248780818 | 0.047162162 | -0.201619 | 0.001857 |
| cg18104919 | chr5 | Island      | 0.345500524 | 0.143918426 | -0.201582 | 0.000482 |
| cg22519422 | chr5 | Island      | 0.24709308  | 0.046060312 | -0.201033 | 0.00145  |
| cg22186831 | chr5 | Island      | 0.283848783 | 0.083121596 | -0.200727 | 0.002402 |
| cg11368643 | chr5 | North Shore | 0.333551656 | 0.133071809 | -0.20048  | 0.006309 |
| cg17785773 | chr5 | Open Sea    | 0.301224135 | 0.10074667  | -0.200477 | 0.000486 |
| cg04607372 | chr5 | Island      | 0.263104703 | 0.063085812 | -0.200019 | 0.001098 |
| cg12106976 | chr6 | Open Sea    | 0.613424437 | 0.072214917 | -0.54121  | 4.6E-07  |
| cg10296205 | chr6 | Open Sea    | 0.621427086 | 0.096064173 | -0.525363 | 8.62E-06 |
| cg18419358 | chr6 | Open Sea    | 0.688301452 | 0.177418015 | -0.510883 | 0.034524 |
| cg06327227 | chr6 | Open Sea    | 0.707324685 | 0.206685933 | -0.500639 | 0.023911 |
| cg09130674 | chr6 | North Shore | 0.584899244 | 0.095451612 | -0.489448 | 0.000876 |
| cg10977795 | chr6 | Island      | 0.615340109 | 0.128510036 | -0.48683  | 0.022252 |
| cg17340729 | chr6 | Open Sea    | 0.591602321 | 0.10477474  | -0.486828 | 6.87E-08 |
| cg12279419 | chr6 | Island      | 0.565780094 | 0.084692555 | -0.481088 | 4.12E-07 |
| cg23503775 | chr6 | Open Sea    | 0.555120085 | 0.076136146 | -0.478984 | 1.13E-09 |
| cg15373592 | chr6 | North Shelf | 0.654578368 | 0.191500745 | -0.463078 | 0.00133  |
| cg11348249 | chr6 | Island      | 0.637955916 | 0.188282634 | -0.449673 | 0.007482 |
| cg01524618 | chr6 | Open Sea    | 0.544006228 | 0.103771945 | -0.440234 | 1.67E-06 |
| cg22244192 | chr6 | Island      | 0.527239419 | 0.09396283  | -0.433277 | 1.9E-06  |
| cg20139336 | chr6 | Open Sea    | 0.618264112 | 0.198719545 | -0.419545 | 0.037761 |
| cg10044101 | chr6 | Open Sea    | 0.66907631  | 0.250509575 | -0.418567 | 2.76E-07 |
| cg05452406 | chr6 | Island      | 0.46123538  | 0.045991624 | -0.415244 | 2.07E-07 |
| cg16151362 | chr6 | South Shore | 0.508655321 | 0.108842025 | -0.399813 | 0.000488 |
| cg01508045 | chr6 | Island      | 0.440876984 | 0.041795591 | -0.399081 | 9.69E-09 |
| cg07631407 | chr6 | Island      | 0.564897111 | 0.168857658 | -0.396039 | 0.003147 |
| cg08864645 | chr6 | Island      | 0.532704308 | 0.149511358 | -0.383193 | 0.002027 |
| cg02627227 | chr6 | Open Sea    | 0.664691213 | 0.282038137 | -0.382653 | 1.05E-07 |
| cg06430632 | chr6 | Open Sea    | 0.681477648 | 0.299009651 | -0.382468 | 0.008118 |

|            |      |             |             |             |           |          |
|------------|------|-------------|-------------|-------------|-----------|----------|
| cg17991695 | chr6 | Island      | 0.487825081 | 0.106254452 | -0.381571 | 1.12E-05 |
| cg25634742 | chr6 | North Shore | 0.572186287 | 0.193206874 | -0.378979 | 5.41E-06 |
| cg14775958 | chr6 | North Shore | 0.830258359 | 0.452293869 | -0.377964 | 0.009755 |
| cg11796455 | chr6 | South Shore | 0.572459851 | 0.197471613 | -0.374988 | 0.005336 |
| cg21749424 | chr6 | North Shelf | 0.635271087 | 0.26317803  | -0.372093 | 0.01584  |
| cg12708994 | chr6 | North Shore | 0.471500601 | 0.101395407 | -0.370105 | 1.49E-06 |
| cg00643235 | chr6 | Open Sea    | 0.604017811 | 0.235247609 | -0.36877  | 0.007729 |
| cg26242687 | chr6 | North Shore | 0.547529025 | 0.179110962 | -0.368418 | 1.5E-06  |
| cg01344171 | chr6 | North Shore | 0.581527082 | 0.21389354  | -0.367634 | 0.042535 |
| cg25036779 | chr6 | Island      | 0.420012466 | 0.052678497 | -0.367334 | 1E-07    |
| cg12182937 | chr6 | North Shore | 0.593747156 | 0.228146475 | -0.365601 | 0.019165 |
| cg22851295 | chr6 | Island      | 0.407883401 | 0.044728147 | -0.363155 | 4.64E-09 |
| cg24329557 | chr6 | North Shore | 0.488863642 | 0.126794709 | -0.362069 | 1.02E-05 |
| cg20837557 | chr6 | North Shore | 0.526494206 | 0.165031532 | -0.361463 | 0.002151 |
| cg21838115 | chr6 | Open Sea    | 0.437349612 | 0.080192353 | -0.357157 | 7.66E-07 |
| cg21364077 | chr6 | North Shore | 0.427382925 | 0.071219822 | -0.356163 | 1.86E-06 |
| cg20001791 | chr6 | South Shore | 0.440511007 | 0.085227889 | -0.355283 | 2.71E-06 |
| cg00333679 | chr6 | Island      | 0.530365958 | 0.175970518 | -0.354395 | 0.000123 |
| cg18132363 | chr6 | Open Sea    | 0.492291882 | 0.140327456 | -0.351964 | 0.013587 |
| cg06512249 | chr6 | North Shore | 0.62401686  | 0.276212535 | -0.347804 | 0.013659 |
| cg20180247 | chr6 | South Shore | 0.412012134 | 0.065242148 | -0.34677  | 1.86E-05 |
| cg12911122 | chr6 | South Shore | 0.457290158 | 0.111664761 | -0.345625 | 0.031431 |
| cg18649028 | chr6 | Open Sea    | 0.387486789 | 0.042548739 | -0.344938 | 2.07E-06 |
| cg19735538 | chr6 | Island      | 0.416282321 | 0.072626328 | -0.343656 | 3.39E-06 |
| cg13703737 | chr6 | Open Sea    | 0.824762003 | 0.483451751 | -0.34131  | 0.011938 |
| cg08301503 | chr6 | Island      | 0.468471048 | 0.127651228 | -0.34082  | 5.65E-05 |
| cg17297775 | chr6 | Open Sea    | 0.932745467 | 0.592646167 | -0.340099 | 0.003293 |
| cg11177740 | chr6 | Open Sea    | 0.901090344 | 0.562995972 | -0.338094 | 5.04E-07 |
| cg05826295 | chr6 | Open Sea    | 0.436274638 | 0.100191118 | -0.336084 | 0.000316 |
| cg13826452 | chr6 | Open Sea    | 0.455149986 | 0.119339766 | -0.33581  | 0.005335 |
| cg04496791 | chr6 | North Shore | 0.540529765 | 0.204986938 | -0.335543 | 0.017563 |
| cg25938025 | chr6 | South Shore | 0.442680412 | 0.108716864 | -0.333964 | 0.004486 |
| cg12241963 | chr6 | Open Sea    | 0.685569703 | 0.357879984 | -0.32769  | 0.000855 |
| cg21317965 | chr6 | Open Sea    | 0.403881432 | 0.078759802 | -0.325122 | 1.77E-06 |
| cg15666214 | chr6 | Island      | 0.48450508  | 0.160311534 | -0.324194 | 0.000993 |
| cg10074727 | chr6 | Island      | 0.385267155 | 0.061572853 | -0.323694 | 3.25E-06 |
| cg01799681 | chr6 | North Shore | 0.450934118 | 0.127699285 | -0.323235 | 0.000126 |
| cg01864699 | chr6 | North Shelf | 0.718022863 | 0.396069582 | -0.321953 | 0.031524 |
| cg24112628 | chr6 | Open Sea    | 0.792567509 | 0.473794352 | -0.318773 | 6.26E-07 |
| cg00333528 | chr6 | Open Sea    | 0.437888417 | 0.120478017 | -0.31741  | 8.62E-07 |
| cg16478536 | chr6 | Open Sea    | 0.455040183 | 0.140082946 | -0.314957 | 0.000898 |
| cg16568727 | chr6 | Island      | 0.355347839 | 0.042486055 | -0.312862 | 3.55E-05 |
| cg16622920 | chr6 | Island      | 0.45020469  | 0.137698083 | -0.312507 | 0.005869 |
| cg01392313 | chr6 | Island      | 0.418791468 | 0.107400638 | -0.311391 | 7.2E-06  |
| cg09516476 | chr6 | Island      | 0.347686866 | 0.036987254 | -0.3107   | 1.28E-05 |
| cg14000361 | chr6 | North Shore | 0.370546067 | 0.059914037 | -0.310632 | 4.09E-05 |
| cg20892245 | chr6 | North Shore | 0.890307458 | 0.579828106 | -0.310479 | 0.001092 |
| cg06289138 | chr6 | Island      | 0.514978012 | 0.20494261  | -0.310035 | 0.027275 |
| cg25410010 | chr6 | Open Sea    | 0.894387881 | 0.587800057 | -0.306588 | 0.031793 |
| cg14663965 | chr6 | North Shore | 0.503046626 | 0.19709784  | -0.305949 | 1.25E-06 |

|            |      |             |             |             |           |          |
|------------|------|-------------|-------------|-------------|-----------|----------|
| cg22620090 | chr6 | Island      | 0.434574005 | 0.128818034 | -0.305756 | 0.002273 |
| cg20236089 | chr6 | Open Sea    | 0.433493826 | 0.128821353 | -0.304672 | 0.00305  |
| cg25042346 | chr6 | Open Sea    | 0.383715108 | 0.079208695 | -0.304506 | 3.04E-07 |
| cg20431250 | chr6 | South Shore | 0.387997678 | 0.08460631  | -0.303391 | 6.39E-06 |
| cg17218813 | chr6 | South Shore | 0.39758481  | 0.094526699 | -0.303058 | 0.000271 |
| cg24113409 | chr6 | South Shore | 0.506413596 | 0.207179268 | -0.299234 | 0.037884 |
| cg04369491 | chr6 | North Shore | 0.457508033 | 0.159044352 | -0.298464 | 0.043645 |
| cg02391713 | chr6 | Island      | 0.457636842 | 0.159316978 | -0.29832  | 0.002884 |
| cg04767522 | chr6 | Open Sea    | 0.697628438 | 0.400217104 | -0.297411 | 0.017768 |
| cg14791639 | chr6 | Open Sea    | 0.564806008 | 0.267663385 | -0.297143 | 0.025266 |
| cg15835542 | chr6 | Open Sea    | 0.387121579 | 0.091614592 | -0.295507 | 2.36E-05 |
| cg25061349 | chr6 | Island      | 0.453151374 | 0.158975792 | -0.294176 | 0.000805 |
| cg05728019 | chr6 | Open Sea    | 0.376528056 | 0.083428937 | -0.293099 | 0.004738 |
| cg02281167 | chr6 | Island      | 0.460946942 | 0.168005478 | -0.292941 | 0.026546 |
| cg19951298 | chr6 | Island      | 0.359660219 | 0.068249619 | -0.291411 | 1.49E-07 |
| cg09667606 | chr6 | Island      | 0.759545065 | 0.468713675 | -0.290831 | 0.02057  |
| cg19729116 | chr6 | Island      | 0.351914502 | 0.061735167 | -0.290179 | 0.000191 |
| cg27641532 | chr6 | South Shore | 0.473007853 | 0.18410759  | -0.2889   | 0.007757 |
| cg09046055 | chr6 | Island      | 0.38675922  | 0.100107304 | -0.286652 | 4.17E-06 |
| cg03872934 | chr6 | Open Sea    | 0.708407908 | 0.42253109  | -0.285877 | 0.004227 |
| cg19095187 | chr6 | North Shore | 0.432249419 | 0.147099899 | -0.28515  | 1.07E-05 |
| cg02895588 | chr6 | Open Sea    | 0.77378898  | 0.488980578 | -0.284808 | 0.003191 |
| cg13246235 | chr6 | Island      | 0.358019357 | 0.073398021 | -0.284621 | 8.47E-05 |
| cg13599020 | chr6 | Open Sea    | 0.470004628 | 0.185673947 | -0.284331 | 0.001304 |
| cg21037008 | chr6 | North Shore | 0.42447912  | 0.140681126 | -0.283798 | 0.001174 |
| cg18132964 | chr6 | South Shore | 0.891454297 | 0.608098417 | -0.283356 | 0.024756 |
| cg20442599 | chr6 | Island      | 0.363300258 | 0.080532022 | -0.282768 | 1.28E-05 |
| cg23676151 | chr6 | Island      | 0.402563355 | 0.1199688   | -0.282595 | 4.68E-05 |
| cg06960164 | chr6 | Island      | 0.408100716 | 0.126212316 | -0.281888 | 0.001656 |
| cg05734456 | chr6 | Island      | 0.368458554 | 0.086952638 | -0.281506 | 0.000227 |
| cg04205041 | chr6 | Open Sea    | 0.357086376 | 0.079248121 | -0.277838 | 5.16E-05 |
| cg16194233 | chr6 | Island      | 0.431461051 | 0.154186974 | -0.277274 | 0.012166 |
| cg23950233 | chr6 | South Shore | 0.389051844 | 0.112230093 | -0.276822 | 0.001954 |
| cg18055007 | chr6 | Island      | 0.346932797 | 0.071122689 | -0.27581  | 0.000275 |
| cg02429905 | chr6 | North Shore | 0.612003242 | 0.336755389 | -0.275248 | 0.000445 |
| cg14029001 | chr6 | Open Sea    | 0.784617121 | 0.509575635 | -0.275041 | 7.9E-06  |
| cg16938363 | chr6 | Island      | 0.314418966 | 0.039402035 | -0.275017 | 8.83E-06 |
| cg08510658 | chr6 | Island      | 0.32514291  | 0.053507358 | -0.271636 | 8.48E-05 |
| cg12061236 | chr6 | Island      | 0.377152056 | 0.106592497 | -0.27056  | 0.010692 |
| cg06473276 | chr6 | Open Sea    | 0.337602654 | 0.068762245 | -0.26884  | 1.9E-05  |
| cg22409854 | chr6 | Island      | 0.294891167 | 0.027170378 | -0.267721 | 0.000102 |
| cg04139449 | chr6 | Island      | 0.449809759 | 0.182431377 | -0.267378 | 0.002241 |
| cg16617518 | chr6 | Island      | 0.33152609  | 0.065265681 | -0.26626  | 0.001032 |
| cg03818715 | chr6 | South Shore | 0.50269392  | 0.238616117 | -0.264078 | 0.001547 |
| cg03883502 | chr6 | Island      | 0.339562848 | 0.075747527 | -0.263815 | 2.22E-06 |
| cg22389949 | chr6 | Open Sea    | 0.343654313 | 0.079890579 | -0.263764 | 3.57E-06 |
| cg07471461 | chr6 | Open Sea    | 0.308814436 | 0.045678676 | -0.263136 | 0.000197 |
| cg16452067 | chr6 | North Shelf | 0.693764768 | 0.431023631 | -0.262741 | 0.006068 |
| cg18424134 | chr6 | North Shore | 0.3351253   | 0.07240255  | -0.262723 | 8.96E-05 |
| cg17761815 | chr6 | Open Sea    | 0.534217065 | 0.272055025 | -0.262162 | 0.035942 |

|            |      |             |             |             |           |          |
|------------|------|-------------|-------------|-------------|-----------|----------|
| cg01883159 | chr6 | North Shore | 0.309104647 | 0.047235773 | -0.261869 | 5.51E-06 |
| cg17161718 | chr6 | Island      | 0.350177127 | 0.088311337 | -0.261866 | 0.004991 |
| cg02524205 | chr6 | Open Sea    | 0.683311274 | 0.421768253 | -0.261543 | 2.92E-05 |
| cg11342453 | chr6 | North Shore | 0.361710495 | 0.101041851 | -0.260669 | 0.040865 |
| cg15991104 | chr6 | North Shelf | 0.333781606 | 0.073681305 | -0.2601   | 9.42E-05 |
| cg02043994 | chr6 | Island      | 0.33878113  | 0.079067165 | -0.259714 | 0.000465 |
| cg24529722 | chr6 | Open Sea    | 0.690292204 | 0.431680134 | -0.258612 | 0.016517 |
| cg12584100 | chr6 | Open Sea    | 0.319684142 | 0.061702185 | -0.257982 | 0.000415 |
| cg00877708 | chr6 | Open Sea    | 0.733917998 | 0.47643919  | -0.257479 | 0.04759  |
| cg19509311 | chr6 | Island      | 0.389299211 | 0.132098236 | -0.257201 | 0.001587 |
| cg13900100 | chr6 | Island      | 0.303330141 | 0.046474094 | -0.256856 | 0.000165 |
| cg26575057 | chr6 | South Shore | 0.387753841 | 0.131493608 | -0.25626  | 7.02E-05 |
| cg04122873 | chr6 | Island      | 0.299070669 | 0.044808853 | -0.254262 | 0.000321 |
| cg08792995 | chr6 | Open Sea    | 0.324019518 | 0.069958657 | -0.254061 | 1.75E-05 |
| cg24595606 | chr6 | South Shore | 0.417483866 | 0.163913045 | -0.253571 | 0.002066 |
| cg05141234 | chr6 | North Shore | 0.326685126 | 0.073337409 | -0.253348 | 7.94E-09 |
| cg15476894 | chr6 | Island      | 0.499205127 | 0.245923751 | -0.253281 | 0.035738 |
| cg08827454 | chr6 | North Shore | 0.47368806  | 0.220551828 | -0.253136 | 0.001954 |
| cg13893782 | chr6 | Open Sea    | 0.343648089 | 0.091041993 | -0.252606 | 0.000278 |
| cg17375249 | chr6 | Island      | 0.316136049 | 0.063678309 | -0.252458 | 0.000417 |
| cg08243135 | chr6 | South Shore | 0.614591284 | 0.362649356 | -0.251942 | 0.000707 |
| cg14028400 | chr6 | Open Sea    | 0.396728002 | 0.145528727 | -0.251199 | 0.013762 |
| cg08376141 | chr6 | Island      | 0.566965326 | 0.316908069 | -0.250057 | 0.010254 |
| cg15366353 | chr6 | North Shore | 0.347570325 | 0.097541978 | -0.250028 | 0.031301 |
| cg10390980 | chr6 | South Shelf | 0.824463505 | 0.574461503 | -0.250002 | 0.036296 |
| cg16108230 | chr6 | Island      | 0.34693511  | 0.098103518 | -0.248832 | 0.010302 |
| cg24594504 | chr6 | Open Sea    | 0.501534914 | 0.253710218 | -0.247825 | 0.025353 |
| cg26922678 | chr6 | South Shore | 0.366402785 | 0.119436789 | -0.246966 | 0.001216 |
| cg13409674 | chr6 | Open Sea    | 0.391634216 | 0.145240237 | -0.246394 | 1.43E-05 |
| cg20731469 | chr6 | Island      | 0.289457669 | 0.043111679 | -0.246346 | 6.96E-05 |
| cg22267770 | chr6 | North Shore | 0.332906794 | 0.089694627 | -0.243212 | 0.001838 |
| cg22367191 | chr6 | North Shore | 0.310817411 | 0.067837347 | -0.24298  | 0.00025  |
| cg17983217 | chr6 | Island      | 0.292179065 | 0.049488261 | -0.242691 | 0.000838 |
| cg18559739 | chr6 | Island      | 0.324321421 | 0.081880666 | -0.242441 | 0.003498 |
| cg27307183 | chr6 | Open Sea    | 0.78945893  | 0.547092869 | -0.242366 | 0.008871 |
| cg23267550 | chr6 | North Shore | 0.458648133 | 0.216715014 | -0.241933 | 0.044285 |
| cg00983948 | chr6 | Island      | 0.403755633 | 0.165921714 | -0.237834 | 0.029437 |
| cg08176353 | chr6 | North Shore | 0.842789105 | 0.605222519 | -0.237567 | 2.92E-05 |
| cg17790159 | chr6 | South Shelf | 0.758897307 | 0.521503708 | -0.237394 | 0.006899 |
| cg03446062 | chr6 | Open Sea    | 0.360361922 | 0.123293452 | -0.237068 | 0.018725 |
| cg22365132 | chr6 | Open Sea    | 0.786130558 | 0.549760096 | -0.23637  | 0.043131 |
| cg09496915 | chr6 | Open Sea    | 0.273705945 | 0.038090589 | -0.235615 | 0.000567 |
| cg22191981 | chr6 | North Shore | 0.302605515 | 0.06769031  | -0.234915 | 0.00047  |
| cg01137047 | chr6 | North Shore | 0.540305108 | 0.306801474 | -0.233504 | 0.001875 |
| cg08445802 | chr6 | Island      | 0.322666803 | 0.089183256 | -0.233484 | 0.002499 |
| cg00667751 | chr6 | Island      | 0.416140629 | 0.1831741   | -0.232967 | 0.000133 |
| cg03076855 | chr6 | Open Sea    | 0.338878747 | 0.10600776  | -0.232871 | 0.001458 |
| cg04482331 | chr6 | Island      | 0.379523894 | 0.147469172 | -0.232055 | 0.000402 |
| cg00124375 | chr6 | Island      | 0.285521368 | 0.053873937 | -0.231647 | 0.000404 |
| cg07086945 | chr6 | Open Sea    | 0.465142809 | 0.233644385 | -0.231498 | 0.008335 |

|            |      |             |             |             |           |          |
|------------|------|-------------|-------------|-------------|-----------|----------|
| cg16447311 | chr6 | North Shore | 0.793128716 | 0.563015093 | -0.230114 | 1.9E-05  |
| cg20851828 | chr6 | North Shore | 0.727520557 | 0.497511501 | -0.230009 | 0.001182 |
| cg06656924 | chr6 | South Shore | 0.46679193  | 0.236907946 | -0.229884 | 0.000545 |
| cg07878800 | chr6 | Island      | 0.345869221 | 0.116117968 | -0.229751 | 0.004718 |
| cg21160099 | chr6 | North Shore | 0.315383832 | 0.085958385 | -0.229425 | 0.000541 |
| cg27368911 | chr6 | Open Sea    | 0.272243841 | 0.042979331 | -0.229265 | 1.37E-05 |
| cg20445245 | chr6 | Island      | 0.548963774 | 0.319790308 | -0.229173 | 5.38E-06 |
| cg06639166 | chr6 | North Shore | 0.304446827 | 0.075286339 | -0.22916  | 0.00016  |
| cg02264288 | chr6 | Open Sea    | 0.302219999 | 0.07390842  | -0.228312 | 0.000273 |
| cg02683197 | chr6 | North Shore | 0.342723327 | 0.114862232 | -0.227861 | 0.001063 |
| cg09829319 | chr6 | North Shore | 0.287120331 | 0.060868812 | -0.226252 | 0.003895 |
| cg05602975 | chr6 | South Shore | 0.344629615 | 0.118589922 | -0.22604  | 0.01016  |
| cg03074925 | chr6 | North Shore | 0.342525729 | 0.117074703 | -0.225451 | 0.003883 |
| cg03811891 | chr6 | Island      | 0.351573827 | 0.12631941  | -0.225254 | 0.005792 |
| cg17952647 | chr6 | North Shore | 0.551374055 | 0.3270913   | -0.224283 | 4.32E-06 |
| cg14431165 | chr6 | Open Sea    | 0.489432782 | 0.26695509  | -0.222478 | 0.014429 |
| cg05746014 | chr6 | Open Sea    | 0.873082013 | 0.650615126 | -0.222467 | 0.048203 |
| cg02196834 | chr6 | North Shore | 0.366367764 | 0.144139499 | -0.222228 | 0.000986 |
| cg00952576 | chr6 | North Shelf | 0.254840056 | 0.032721456 | -0.222119 | 4.91E-05 |
| cg00617292 | chr6 | Open Sea    | 0.770072689 | 0.548362067 | -0.221711 | 0.047374 |
| cg07322064 | chr6 | Island      | 0.564656966 | 0.343102167 | -0.221555 | 0.025476 |
| cg09194778 | chr6 | Open Sea    | 0.817866673 | 0.597069048 | -0.220798 | 0.044141 |
| cg10507304 | chr6 | Open Sea    | 0.302742677 | 0.08199034  | -0.220752 | 0.000577 |
| cg26257411 | chr6 | South Shore | 0.588724037 | 0.368070115 | -0.220654 | 2.82E-07 |
| cg04247603 | chr6 | North Shore | 0.440960361 | 0.221660953 | -0.219299 | 0.007039 |
| cg00474080 | chr6 | Island      | 0.276238587 | 0.056990884 | -0.219248 | 0.002091 |
| cg05224741 | chr6 | Island      | 0.282539134 | 0.06343179  | -0.219107 | 0.005341 |
| cg25657713 | chr6 | Island      | 0.370638659 | 0.153526969 | -0.217112 | 0.001855 |
| cg06458086 | chr6 | Open Sea    | 0.828847534 | 0.611933023 | -0.216915 | 0.014852 |
| cg26361999 | chr6 | Open Sea    | 0.613701338 | 0.397295594 | -0.216406 | 0.029926 |
| cg17866778 | chr6 | Open Sea    | 0.370657308 | 0.154787502 | -0.21587  | 0.021728 |
| cg14934253 | chr6 | North Shore | 0.277246957 | 0.061528017 | -0.215719 | 0.002311 |
| cg01390950 | chr6 | South Shelf | 0.567807346 | 0.352430866 | -0.215376 | 8.98E-05 |
| cg00370106 | chr6 | Open Sea    | 0.421910475 | 0.206692224 | -0.215218 | 0.000307 |
| cg15753394 | chr6 | South Shore | 0.442724355 | 0.227572075 | -0.215152 | 0.009843 |
| cg23732781 | chr6 | North Shore | 0.599621132 | 0.384618172 | -0.215003 | 0.019218 |
| cg21502834 | chr6 | North Shelf | 0.385715997 | 0.171488137 | -0.214228 | 0.002086 |
| cg04554928 | chr6 | Island      | 0.303515037 | 0.090408832 | -0.213106 | 0.001867 |
| cg07265541 | chr6 | Open Sea    | 0.316995207 | 0.104751015 | -0.212244 | 9.17E-05 |
| cg27659622 | chr6 | Open Sea    | 0.258326389 | 0.047634907 | -0.210691 | 0.00017  |
| cg19722656 | chr6 | North Shore | 0.282436287 | 0.072006064 | -0.21043  | 0.000206 |
| cg16323298 | chr6 | Island      | 0.321436725 | 0.111081273 | -0.210355 | 0.028434 |
| cg24641186 | chr6 | Open Sea    | 0.347307568 | 0.137875634 | -0.209432 | 0.029671 |
| cg02596153 | chr6 | Island      | 0.278462713 | 0.0692067   | -0.209256 | 0.006308 |
| cg06924459 | chr6 | South Shore | 0.300554557 | 0.091936245 | -0.208618 | 0.004688 |
| cg01255417 | chr6 | Island      | 0.538521704 | 0.33009671  | -0.208425 | 0.039868 |
| cg12498088 | chr6 | Island      | 0.28795571  | 0.079789618 | -0.208166 | 0.001355 |
| cg03169508 | chr6 | South Shelf | 0.281404123 | 0.073524542 | -0.20788  | 0.003461 |
| cg19206146 | chr6 | Open Sea    | 0.297139005 | 0.089700265 | -0.207439 | 0.001174 |
| cg07905696 | chr6 | Open Sea    | 0.629774607 | 0.422637424 | -0.207137 | 0.03459  |

|            |      |             |             |             |           |          |
|------------|------|-------------|-------------|-------------|-----------|----------|
| cg13209822 | chr6 | Open Sea    | 0.367397068 | 0.160336888 | -0.20706  | 0.046112 |
| cg18486258 | chr6 | South Shore | 0.490845151 | 0.283856906 | -0.206988 | 0.00082  |
| cg23850750 | chr6 | Island      | 0.285093658 | 0.079380602 | -0.205713 | 0.008481 |
| cg23638518 | chr6 | North Shelf | 0.687505049 | 0.482016454 | -0.205489 | 0.015185 |
| cg00609135 | chr6 | Island      | 0.294929695 | 0.089499322 | -0.20543  | 0.005642 |
| cg06014958 | chr6 | North Shore | 0.317010373 | 0.112757266 | -0.204253 | 0.004481 |
| cg04543938 | chr6 | Island      | 0.264467555 | 0.060253526 | -0.204214 | 0.010575 |
| cg00731683 | chr6 | Island      | 0.394906547 | 0.191504431 | -0.203402 | 0.015272 |
| cg11874627 | chr6 | South Shore | 0.404446491 | 0.201598889 | -0.202848 | 0.025224 |
| cg16458153 | chr6 | Island      | 0.252577951 | 0.050352396 | -0.202226 | 0.000281 |
| cg01518607 | chr6 | Open Sea    | 0.316562836 | 0.114430688 | -0.202132 | 0.001168 |
| cg12634245 | chr6 | Open Sea    | 0.417233143 | 0.215410397 | -0.201823 | 0.005598 |
| cg00862588 | chr6 | Open Sea    | 0.326780093 | 0.125454172 | -0.201326 | 0.001443 |
| cg05886811 | chr6 | Island      | 0.610300857 | 0.409417586 | -0.200883 | 0.01367  |
| cg22476027 | chr6 | South Shore | 0.426335284 | 0.225897088 | -0.200438 | 0.000231 |
| cg00656735 | chr6 | North Shore | 0.393668154 | 0.193320134 | -0.200348 | 0.004401 |
| cg02254056 | chr6 | South Shore | 0.272549154 | 0.072340734 | -0.200208 | 3.82E-05 |
| cg20659418 | chr6 | North Shelf | 0.246659451 | 0.046604868 | -0.200055 | 0.001635 |
| cg07686872 | chr7 | North Shore | 0.640466909 | 0.107920386 | -0.532547 | 8.4E-08  |
| cg25711558 | chr7 | Open Sea    | 0.638114018 | 0.114170666 | -0.523943 | 0.000399 |
| cg18527241 | chr7 | Open Sea    | 0.582837079 | 0.079240966 | -0.503596 | 1.45E-06 |
| cg03604067 | chr7 | South Shore | 0.551905284 | 0.056214438 | -0.495691 | 1.63E-09 |
| cg01322214 | chr7 | North Shore | 0.690450094 | 0.19615091  | -0.494299 | 0.045992 |
| cg04080282 | chr7 | Island      | 0.610020809 | 0.118586238 | -0.491435 | 4.04E-09 |
| cg18550262 | chr7 | Open Sea    | 0.643855033 | 0.15464274  | -0.489212 | 0.011164 |
| cg13391244 | chr7 | Open Sea    | 0.572240002 | 0.093981143 | -0.478259 | 4.94E-08 |
| cg11435506 | chr7 | Island      | 0.539259225 | 0.062574662 | -0.476685 | 2.45E-09 |
| cg08898155 | chr7 | Island      | 0.532598987 | 0.061654327 | -0.470945 | 2.66E-08 |
| cg07981013 | chr7 | Island      | 0.547358895 | 0.079869549 | -0.467489 | 1.81E-09 |
| cg21637392 | chr7 | Open Sea    | 0.542882065 | 0.083361758 | -0.45952  | 9.27E-08 |
| cg25161512 | chr7 | Island      | 0.518469595 | 0.059418327 | -0.459051 | 3.68E-08 |
| cg08309529 | chr7 | Island      | 0.524882846 | 0.068009859 | -0.456873 | 6.68E-06 |
| cg23230584 | chr7 | Island      | 0.491651446 | 0.035868055 | -0.455783 | 5.11E-10 |
| cg08828819 | chr7 | Island      | 0.498689187 | 0.051628974 | -0.44706  | 1.88E-08 |
| cg15500865 | chr7 | Island      | 0.499202838 | 0.053118078 | -0.446085 | 9.2E-09  |
| cg15927196 | chr7 | Island      | 0.511549656 | 0.078235679 | -0.433314 | 1.08E-05 |
| cg05803296 | chr7 | Open Sea    | 0.511596545 | 0.079366142 | -0.43223  | 8.44E-10 |
| cg04598292 | chr7 | North Shore | 0.522968171 | 0.093739967 | -0.429228 | 5.35E-07 |
| cg17871993 | chr7 | South Shelf | 0.524991358 | 0.100873061 | -0.424118 | 5.2E-05  |
| cg07121856 | chr7 | Island      | 0.488318389 | 0.066488526 | -0.42183  | 4.47E-07 |
| cg03301582 | chr7 | Island      | 0.497152587 | 0.076006146 | -0.421146 | 0.000406 |
| cg14427668 | chr7 | Open Sea    | 0.50094812  | 0.081044221 | -0.419904 | 1.73E-08 |
| cg14989988 | chr7 | Open Sea    | 0.675768426 | 0.255884286 | -0.419884 | 0.010889 |
| cg08645907 | chr7 | Open Sea    | 0.494074631 | 0.079579821 | -0.414495 | 1.36E-06 |
| cg19351954 | chr7 | Open Sea    | 0.591349836 | 0.177025376 | -0.414324 | 0.048189 |
| cg25007683 | chr7 | Open Sea    | 0.556024549 | 0.144083292 | -0.411941 | 2.42E-07 |
| cg10094489 | chr7 | Island      | 0.503028766 | 0.091750946 | -0.411278 | 4.64E-05 |
| cg06146234 | chr7 | North Shore | 0.490130812 | 0.079973766 | -0.410157 | 8.91E-10 |
| cg25871890 | chr7 | Open Sea    | 0.800378195 | 0.392106712 | -0.408271 | 0.029174 |
| cg04685170 | chr7 | Island      | 0.513213494 | 0.107021274 | -0.406192 | 0.00396  |

|            |      |             |             |             |           |          |
|------------|------|-------------|-------------|-------------|-----------|----------|
| cg08520743 | chr7 | Island      | 0.454426267 | 0.05280196  | -0.401624 | 1.28E-06 |
| cg00143249 | chr7 | Island      | 0.458147627 | 0.057203666 | -0.400944 | 1.38E-06 |
| cg16283362 | chr7 | Island      | 0.48988402  | 0.090773393 | -0.399111 | 5.88E-07 |
| cg25572105 | chr7 | Island      | 0.477835048 | 0.079649261 | -0.398186 | 0.000123 |
| cg26472133 | chr7 | Island      | 0.448104387 | 0.058738484 | -0.389366 | 1.46E-08 |
| cg07916589 | chr7 | Island      | 0.474992222 | 0.087618443 | -0.387374 | 1.88E-05 |
| cg12164596 | chr7 | Island      | 0.527771417 | 0.142098935 | -0.385672 | 0.000583 |
| cg05060949 | chr7 | Island      | 0.412414459 | 0.031360829 | -0.381054 | 1.45E-07 |
| cg16180796 | chr7 | Island      | 0.569136789 | 0.190195493 | -0.378941 | 0.004865 |
| cg00374672 | chr7 | North Shore | 0.450764091 | 0.072220315 | -0.378544 | 0.000814 |
| cg17642369 | chr7 | Open Sea    | 0.519474223 | 0.141254662 | -0.37822  | 0.023212 |
| cg05167561 | chr7 | Island      | 0.553472949 | 0.178829685 | -0.374643 | 9.02E-06 |
| cg08622757 | chr7 | Island      | 0.447293555 | 0.073796193 | -0.373497 | 3.49E-06 |
| cg09579281 | chr7 | North Shelf | 0.4932283   | 0.120807791 | -0.372421 | 1.55E-05 |
| cg04487296 | chr7 | Island      | 0.588915724 | 0.220036106 | -0.36888  | 0.000417 |
| cg00555456 | chr7 | North Shore | 0.606614208 | 0.238067239 | -0.368547 | 0.000536 |
| cg00313685 | chr7 | Open Sea    | 0.826653004 | 0.458706228 | -0.367947 | 0.000139 |
| cg24540114 | chr7 | Island      | 0.467762528 | 0.100576359 | -0.367186 | 1.5E-05  |
| cg23807071 | chr7 | South Shore | 0.442939643 | 0.083207359 | -0.359732 | 8.92E-08 |
| cg05045981 | chr7 | Island      | 0.453124407 | 0.095923051 | -0.357201 | 6.66E-07 |
| cg08167951 | chr7 | Island      | 0.46599503  | 0.110833943 | -0.355161 | 2.66E-09 |
| cg04690998 | chr7 | Open Sea    | 0.466253366 | 0.114287969 | -0.351965 | 0.004128 |
| cg21389309 | chr7 | South Shore | 0.51746591  | 0.167887441 | -0.349578 | 0.001279 |
| cg27511599 | chr7 | Open Sea    | 0.611055292 | 0.264076091 | -0.346979 | 0.021631 |
| cg00953154 | chr7 | North Shore | 0.397065285 | 0.054672145 | -0.342393 | 1.4E-05  |
| cg09642347 | chr7 | North Shore | 0.529674261 | 0.189405217 | -0.340269 | 0.001315 |
| cg00353923 | chr7 | North Shore | 0.40160722  | 0.061748292 | -0.339859 | 3.57E-07 |
| cg10864952 | chr7 | South Shore | 0.454287153 | 0.114962148 | -0.339325 | 0.000102 |
| cg13710553 | chr7 | Open Sea    | 0.57225554  | 0.23323454  | -0.339021 | 0.00049  |
| cg27651243 | chr7 | Island      | 0.371741055 | 0.034881883 | -0.336859 | 1.32E-06 |
| cg17344321 | chr7 | Open Sea    | 0.443021858 | 0.110394239 | -0.332628 | 1.2E-05  |
| cg18793404 | chr7 | Open Sea    | 0.429361577 | 0.099061116 | -0.3303   | 0.000573 |
| cg11342198 | chr7 | Open Sea    | 0.500058965 | 0.170040041 | -0.330019 | 0.040152 |
| cg16714154 | chr7 | Open Sea    | 0.475523123 | 0.145538653 | -0.329984 | 0.028172 |
| cg05715123 | chr7 | Open Sea    | 0.782957672 | 0.453969542 | -0.328988 | 0.041128 |
| cg07006935 | chr7 | Open Sea    | 0.475527182 | 0.147949498 | -0.327578 | 1.18E-06 |
| cg20521696 | chr7 | North Shore | 0.703728888 | 0.378809294 | -0.32492  | 1.1E-07  |
| cg23729283 | chr7 | Open Sea    | 0.891450497 | 0.569081546 | -0.322369 | 0.04496  |
| cg06104408 | chr7 | South Shore | 0.579752404 | 0.257984938 | -0.321767 | 0.004846 |
| cg09181792 | chr7 | Open Sea    | 0.424867372 | 0.103507689 | -0.32136  | 0.000583 |
| cg04631458 | chr7 | Island      | 0.584269487 | 0.264027878 | -0.320242 | 0.025004 |
| cg14163444 | chr7 | Island      | 0.360887347 | 0.041551196 | -0.319336 | 8.93E-07 |
| cg17462533 | chr7 | Open Sea    | 0.814523054 | 0.495851876 | -0.318671 | 0.033384 |
| cg26171871 | chr7 | Island      | 0.409154479 | 0.090636141 | -0.318518 | 0.015758 |
| cg13345957 | chr7 | Island      | 0.358934295 | 0.040652265 | -0.318282 | 4.06E-05 |
| cg13468898 | chr7 | Island      | 0.90820628  | 0.5935803   | -0.314626 | 2.97E-05 |
| cg04372674 | chr7 | Open Sea    | 0.510494905 | 0.197359306 | -0.313136 | 0.04446  |
| cg08097290 | chr7 | Open Sea    | 0.858630783 | 0.549283644 | -0.309347 | 3.9E-09  |
| cg01287054 | chr7 | North Shore | 0.395349043 | 0.086528316 | -0.308821 | 0.000298 |
| cg19799702 | chr7 | North Shore | 0.536150638 | 0.22918021  | -0.30697  | 0.012208 |

|            |      |             |             |             |           |          |
|------------|------|-------------|-------------|-------------|-----------|----------|
| cg27212520 | chr7 | North Shore | 0.868593103 | 0.56608925  | -0.302504 | 0.036918 |
| cg08927016 | chr7 | Island      | 0.373538174 | 0.076592539 | -0.296946 | 0.000115 |
| cg02768721 | chr7 | South Shore | 0.370964153 | 0.074710498 | -0.296254 | 2.84E-05 |
| cg11539674 | chr7 | North Shore | 0.456799681 | 0.161222415 | -0.295577 | 0.026109 |
| cg10329418 | chr7 | South Shore | 0.512608728 | 0.217477769 | -0.295131 | 0.000379 |
| cg00042882 | chr7 | North Shore | 0.448199497 | 0.154420866 | -0.293779 | 0.025004 |
| cg00560277 | chr7 | North Shore | 0.419987641 | 0.126352279 | -0.293635 | 4.7E-06  |
| cg27342333 | chr7 | Open Sea    | 0.611331733 | 0.318252769 | -0.293079 | 0.045797 |
| cg03552937 | chr7 | Open Sea    | 0.681304314 | 0.389023085 | -0.292281 | 0.008438 |
| cg02133456 | chr7 | Open Sea    | 0.671704672 | 0.379471044 | -0.292234 | 0.002582 |
| cg03332469 | chr7 | Island      | 0.364955589 | 0.073151219 | -0.291804 | 1.64E-06 |
| cg14249876 | chr7 | Open Sea    | 0.344955757 | 0.055357297 | -0.289598 | 0.000473 |
| cg02770724 | chr7 | North Shore | 0.549020291 | 0.26110375  | -0.287917 | 5.92E-06 |
| cg18057109 | chr7 | Island      | 0.402228287 | 0.115233073 | -0.286995 | 5.52E-05 |
| cg25287257 | chr7 | Island      | 0.33778148  | 0.051759722 | -0.286022 | 0.000112 |
| cg14343652 | chr7 | North Shore | 0.341311083 | 0.055500486 | -0.285811 | 7.48E-05 |
| cg19523667 | chr7 | Open Sea    | 0.768174964 | 0.483495349 | -0.28468  | 0.0139   |
| cg22108567 | chr7 | South Shore | 0.388303176 | 0.104527787 | -0.283775 | 9.05E-06 |
| cg02936315 | chr7 | North Shore | 0.383050881 | 0.100675514 | -0.282375 | 4.41E-05 |
| cg07188513 | chr7 | North Shelf | 0.359062842 | 0.077530416 | -0.281532 | 0.005208 |
| cg26565544 | chr7 | Open Sea    | 0.51694317  | 0.235654003 | -0.281289 | 0.00283  |
| cg08132858 | chr7 | Open Sea    | 0.51076653  | 0.230896367 | -0.27987  | 0.027168 |
| cg05639205 | chr7 | Island      | 0.380266166 | 0.104587811 | -0.275678 | 0.008563 |
| cg26490671 | chr7 | South Shore | 0.798766075 | 0.523688778 | -0.275077 | 6.07E-05 |
| cg16272030 | chr7 | Open Sea    | 0.800380384 | 0.526078254 | -0.274302 | 0.013579 |
| cg07703462 | chr7 | Island      | 0.315997584 | 0.043754937 | -0.272243 | 0.000117 |
| cg23779604 | chr7 | South Shelf | 0.692397814 | 0.42054657  | -0.271851 | 0.015862 |
| cg09244707 | chr7 | North Shore | 0.726861432 | 0.455952228 | -0.270909 | 0.026234 |
| cg02712145 | chr7 | Island      | 0.377046705 | 0.107478617 | -0.269568 | 0.001545 |
| cg00929322 | chr7 | Open Sea    | 0.8534138   | 0.583924833 | -0.269489 | 0.006493 |
| cg18179075 | chr7 | Open Sea    | 0.325055928 | 0.055677137 | -0.269379 | 0.000513 |
| cg15703773 | chr7 | Island      | 0.354265767 | 0.085952973 | -0.268313 | 0.000266 |
| cg22789065 | chr7 | Open Sea    | 0.705900447 | 0.438192857 | -0.267708 | 0.007282 |
| cg02363526 | chr7 | North Shore | 0.655839493 | 0.390740857 | -0.265099 | 0.00036  |
| cg20745684 | chr7 | North Shore | 0.427397683 | 0.162895498 | -0.264502 | 2.75E-05 |
| cg17421991 | chr7 | Island      | 0.327107001 | 0.0629004   | -0.264207 | 0.000324 |
| cg10477621 | chr7 | Island      | 0.421843213 | 0.157928831 | -0.263914 | 1.18E-05 |
| cg15812586 | chr7 | Open Sea    | 0.462944926 | 0.199997907 | -0.262947 | 0.000625 |
| cg18311708 | chr7 | South Shore | 0.526676393 | 0.265379895 | -0.261296 | 0.017421 |
| cg06422678 | chr7 | Open Sea    | 0.465017124 | 0.204688284 | -0.260329 | 0.008545 |
| cg03604367 | chr7 | Island      | 0.370824014 | 0.110751854 | -0.260072 | 0.00016  |
| cg05744332 | chr7 | North Shore | 0.622876192 | 0.362805931 | -0.26007  | 2.16E-05 |
| cg08849294 | chr7 | Island      | 0.83025397  | 0.571172522 | -0.259081 | 0.003203 |
| cg02293118 | chr7 | Island      | 0.331457735 | 0.072604302 | -0.258853 | 0.000286 |
| cg09846875 | chr7 | South Shore | 0.307881851 | 0.05155288  | -0.256329 | 0.001042 |
| cg23018117 | chr7 | North Shelf | 0.319011188 | 0.062776559 | -0.256235 | 0.000328 |
| cg12616484 | chr7 | Island      | 0.881876765 | 0.626263332 | -0.255613 | 0.000389 |
| cg12177546 | chr7 | North Shore | 0.336816763 | 0.081829093 | -0.254988 | 0.000127 |
| cg26923410 | chr7 | Open Sea    | 0.352310259 | 0.09825487  | -0.254055 | 0.012635 |
| cg25509184 | chr7 | Open Sea    | 0.322287317 | 0.06862078  | -0.253667 | 0.000201 |

|            |      |             |             |             |           |          |
|------------|------|-------------|-------------|-------------|-----------|----------|
| cg07898764 | chr7 | Open Sea    | 0.816850845 | 0.565722865 | -0.251128 | 0.022825 |
| cg24497732 | chr7 | South Shore | 0.483907792 | 0.233616761 | -0.250291 | 0.000179 |
| cg13134297 | chr7 | Open Sea    | 0.471176857 | 0.221367548 | -0.249809 | 0.002998 |
| cg17204129 | chr7 | Open Sea    | 0.302389036 | 0.053102455 | -0.249287 | 0.000491 |
| cg07209634 | chr7 | Island      | 0.409200455 | 0.160233657 | -0.248967 | 0.036354 |
| cg21984793 | chr7 | Open Sea    | 0.752589741 | 0.50643082  | -0.246159 | 0.00011  |
| cg23708337 | chr7 | Open Sea    | 0.347368024 | 0.101498368 | -0.24587  | 0.009337 |
| cg06335867 | chr7 | Island      | 0.348565876 | 0.10457547  | -0.24399  | 0.029098 |
| cg15032166 | chr7 | South Shore | 0.4349968   | 0.191682762 | -0.243314 | 0.039666 |
| cg12914657 | chr7 | North Shelf | 0.296930109 | 0.054307216 | -0.242623 | 0.000414 |
| cg03229158 | chr7 | Open Sea    | 0.307985698 | 0.0673656   | -0.24062  | 9.97E-07 |
| cg06937717 | chr7 | Island      | 0.295556187 | 0.055129463 | -0.240427 | 6.67E-05 |
| cg06114334 | chr7 | Open Sea    | 0.336022801 | 0.095622098 | -0.240401 | 0.029148 |
| cg12597389 | chr7 | Island      | 0.316795703 | 0.077839887 | -0.238956 | 2.95E-05 |
| cg09676669 | chr7 | Open Sea    | 0.375047326 | 0.136228723 | -0.238819 | 0.001831 |
| cg22650458 | chr7 | Open Sea    | 0.581850326 | 0.344224021 | -0.237626 | 0.001869 |
| cg15751116 | chr7 | North Shore | 0.352947877 | 0.115561184 | -0.237387 | 0.001571 |
| cg03413097 | chr7 | Island      | 0.285522964 | 0.04849096  | -0.237032 | 0.00041  |
| cg14073571 | chr7 | Island      | 0.405601858 | 0.169021371 | -0.23658  | 3.97E-05 |
| cg19230755 | chr7 | Island      | 0.36592573  | 0.129482167 | -0.236444 | 0.037233 |
| cg03323793 | chr7 | Open Sea    | 0.666065592 | 0.430552923 | -0.235513 | 3.12E-06 |
| cg05640128 | chr7 | Island      | 0.277160195 | 0.042929699 | -0.23423  | 0.000418 |
| cg01874867 | chr7 | South Shore | 0.696467257 | 0.462380586 | -0.234087 | 0.006788 |
| cg25023684 | chr7 | Open Sea    | 0.682742558 | 0.448895661 | -0.233847 | 0.000898 |
| cg09920605 | chr7 | South Shore | 0.294110897 | 0.060997082 | -0.233114 | 0.000105 |
| cg20554353 | chr7 | South Shore | 0.732051174 | 0.499058552 | -0.232993 | 0.032752 |
| cg03297163 | chr7 | Open Sea    | 0.272299566 | 0.04013561  | -0.232164 | 2.76E-05 |
| cg00477302 | chr7 | Open Sea    | 0.446637891 | 0.216425722 | -0.230212 | 0.040831 |
| cg00364696 | chr7 | North Shore | 0.894944209 | 0.667831799 | -0.227112 | 0.021652 |
| cg08166222 | chr7 | Open Sea    | 0.532244627 | 0.305281634 | -0.226963 | 0.048468 |
| cg06746009 | chr7 | South Shelf | 0.765460629 | 0.538854734 | -0.226606 | 0.024471 |
| cg26173847 | chr7 | North Shore | 0.304548386 | 0.078611247 | -0.225937 | 0.000165 |
| cg13759946 | chr7 | Open Sea    | 0.838055717 | 0.612662704 | -0.225393 | 7.61E-09 |
| cg27481555 | chr7 | Open Sea    | 0.34490155  | 0.119876357 | -0.225025 | 0.014453 |
| cg11858226 | chr7 | Open Sea    | 0.277195227 | 0.052400715 | -0.224795 | 7.31E-05 |
| cg24378559 | chr7 | Open Sea    | 0.599733294 | 0.375152815 | -0.22458  | 0.005065 |
| cg02890194 | chr7 | North Shore | 0.40251688  | 0.178308763 | -0.224208 | 9.32E-06 |
| cg26595520 | chr7 | North Shore | 0.266662209 | 0.042922618 | -0.22374  | 2.48E-06 |
| cg14288925 | chr7 | South Shelf | 0.710043565 | 0.486431314 | -0.223612 | 0.009202 |
| cg25289803 | chr7 | Open Sea    | 0.344566535 | 0.121319149 | -0.223247 | 0.000463 |
| cg20019546 | chr7 | Island      | 0.368800029 | 0.145839174 | -0.222961 | 0.0093   |
| cg22960347 | chr7 | Open Sea    | 0.797745729 | 0.575597559 | -0.222148 | 0.001216 |
| cg00813027 | chr7 | Open Sea    | 0.34082523  | 0.119306163 | -0.221519 | 0.013695 |
| cg04697148 | chr7 | Island      | 0.349302175 | 0.127916342 | -0.221386 | 0.00497  |
| cg11884030 | chr7 | Open Sea    | 0.308888804 | 0.088319474 | -0.220569 | 0.002749 |
| cg08739576 | chr7 | Open Sea    | 0.25781681  | 0.037764369 | -0.220052 | 0.00113  |
| cg13544851 | chr7 | South Shore | 0.274855619 | 0.056950092 | -0.217906 | 0.00122  |
| cg11131117 | chr7 | South Shore | 0.85106612  | 0.633850434 | -0.217216 | 9.89E-08 |
| cg09845489 | chr7 | South Shore | 0.532029028 | 0.314979129 | -0.21705  | 0.001925 |
| cg27627209 | chr7 | Open Sea    | 0.254288668 | 0.037854196 | -0.216434 | 0.001419 |

|            |      |             |             |             |           |          |
|------------|------|-------------|-------------|-------------|-----------|----------|
| cg21322436 | chr7 | North Shore | 0.349396921 | 0.13371136  | -0.215686 | 0.01289  |
| cg04474277 | chr7 | Open Sea    | 0.322690815 | 0.10824163  | -0.214449 | 0.001931 |
| cg11260097 | chr7 | Island      | 0.330861311 | 0.11740128  | -0.21346  | 4.59E-06 |
| cg18080604 | chr7 | Open Sea    | 0.37521994  | 0.162155882 | -0.213064 | 0.016703 |
| cg25843426 | chr7 | North Shore | 0.480684478 | 0.268034823 | -0.21265  | 0.00796  |
| cg01008256 | chr7 | Island      | 0.348843002 | 0.136333523 | -0.212509 | 0.0338   |
| cg19836549 | chr7 | Open Sea    | 0.517969402 | 0.306125332 | -0.211844 | 0.033226 |
| cg12353688 | chr7 | North Shore | 0.411340811 | 0.201464279 | -0.209877 | 0.009398 |
| cg14644871 | chr7 | Island      | 0.353887753 | 0.144232799 | -0.209655 | 0.003841 |
| cg24052359 | chr7 | Island      | 0.253997782 | 0.045204036 | -0.208794 | 0.000445 |
| cg22728904 | chr7 | North Shore | 0.294799103 | 0.08616684  | -0.208632 | 0.005992 |
| cg15847926 | chr7 | Open Sea    | 0.34055443  | 0.132161386 | -0.208393 | 0.04474  |
| cg15764975 | chr7 | Open Sea    | 0.293915521 | 0.086548471 | -0.207367 | 0.000351 |
| cg06217803 | chr7 | South Shore | 0.855086474 | 0.649427064 | -0.205659 | 0.000169 |
| cg02207386 | chr7 | North Shore | 0.363321777 | 0.158330621 | -0.204991 | 0.009587 |
| cg07542748 | chr7 | Open Sea    | 0.518781633 | 0.313841091 | -0.204941 | 0.013866 |
| cg04455137 | chr7 | Open Sea    | 0.240397038 | 0.03638069  | -0.204016 | 0.001675 |
| cg16771407 | chr7 | Island      | 0.366393988 | 0.163225732 | -0.203168 | 0.000391 |
| cg10064162 | chr7 | South Shore | 0.304146965 | 0.101237178 | -0.20291  | 0.029872 |
| cg17616554 | chr7 | Open Sea    | 0.247900172 | 0.045589808 | -0.20231  | 0.00323  |
| cg00929606 | chr7 | South Shore | 0.293068493 | 0.091525876 | -0.201543 | 0.004883 |
| cg01071511 | chr7 | North Shore | 0.840748532 | 0.640346772 | -0.200402 | 0.012047 |
| cg19071544 | chr7 | Open Sea    | 0.66355004  | 0.463304742 | -0.200245 | 0.000236 |
| cg12782180 | chr7 | Island      | 0.479273272 | 0.279053945 | -0.200219 | 0.033083 |
| cg25673784 | chr8 | South Shore | 0.635241826 | 0.159364828 | -0.475877 | 0.041023 |
| cg20982735 | chr8 | Island      | 0.615651331 | 0.154204928 | -0.461446 | 0.00408  |
| cg07570470 | chr8 | Island      | 0.564182068 | 0.112948107 | -0.451234 | 2.91E-05 |
| cg09851545 | chr8 | Open Sea    | 0.491357578 | 0.051168566 | -0.440189 | 2.22E-08 |
| cg15541630 | chr8 | Island      | 0.606029193 | 0.168580156 | -0.437449 | 0.003975 |
| cg11982546 | chr8 | Open Sea    | 0.496370096 | 0.064283211 | -0.432087 | 1.35E-09 |
| cg11931596 | chr8 | Open Sea    | 0.545507416 | 0.128272366 | -0.417235 | 0.026233 |
| cg17788832 | chr8 | Island      | 0.504833792 | 0.094057849 | -0.410776 | 0.001627 |
| cg03066788 | chr8 | Open Sea    | 0.630675387 | 0.221053621 | -0.409622 | 0.01127  |
| cg23816247 | chr8 | South Shore | 0.50186278  | 0.102465358 | -0.399397 | 0.000639 |
| cg22524061 | chr8 | North Shore | 0.574589441 | 0.176428412 | -0.398161 | 0.040149 |
| cg09557462 | chr8 | Island      | 0.484771494 | 0.098803541 | -0.385968 | 0.043071 |
| cg26268277 | chr8 | South Shore | 0.498033201 | 0.116977012 | -0.381056 | 0.048572 |
| cg16848524 | chr8 | Island      | 0.468693965 | 0.089932856 | -0.378761 | 0.000573 |
| cg22146357 | chr8 | North Shore | 0.443383105 | 0.081105701 | -0.362277 | 2.64E-07 |
| cg09506473 | chr8 | Island      | 0.43839906  | 0.079661279 | -0.358738 | 2.18E-06 |
| cg04717143 | chr8 | Island      | 0.525039517 | 0.168316303 | -0.356723 | 0.039273 |
| cg26205771 | chr8 | North Shore | 0.42119502  | 0.067148309 | -0.354047 | 7.97E-07 |
| cg16314639 | chr8 | South Shore | 0.48786784  | 0.141337087 | -0.346531 | 0.01307  |
| cg16103712 | chr8 | Open Sea    | 0.459832075 | 0.113987069 | -0.345845 | 4.07E-07 |
| cg02046552 | chr8 | Island      | 0.551533013 | 0.208137915 | -0.343395 | 0.024525 |
| cg19003304 | chr8 | North Shore | 0.634618368 | 0.291257923 | -0.34336  | 0.015273 |
| cg14657725 | chr8 | North Shore | 0.562751916 | 0.220047693 | -0.342704 | 0.038761 |
| cg20904475 | chr8 | Island      | 0.397243731 | 0.055347524 | -0.341896 | 0.000855 |
| cg11235391 | chr8 | Open Sea    | 0.440552275 | 0.09871152  | -0.341841 | 8.95E-07 |
| cg03979241 | chr8 | South Shelf | 0.580701911 | 0.241834003 | -0.338868 | 2.18E-06 |

|            |      |             |             |             |           |          |
|------------|------|-------------|-------------|-------------|-----------|----------|
| cg08569678 | chr8 | North Shore | 0.403117865 | 0.065567394 | -0.33755  | 1.4E-06  |
| cg10225865 | chr8 | Open Sea    | 0.434248674 | 0.103990746 | -0.330258 | 0.000349 |
| cg24340081 | chr8 | Open Sea    | 0.468726307 | 0.139866437 | -0.32886  | 0.033779 |
| cg19790640 | chr8 | South Shore | 0.44216301  | 0.114356    | -0.327807 | 0.003298 |
| cg03653399 | chr8 | South Shore | 0.837406014 | 0.511656077 | -0.32575  | 0.029054 |
| cg12729838 | chr8 | North Shelf | 0.499735505 | 0.174711459 | -0.325024 | 0.000311 |
| cg01607321 | chr8 | Open Sea    | 0.718238936 | 0.398849233 | -0.31939  | 0.025822 |
| cg26256223 | chr8 | Island      | 0.385956021 | 0.068184026 | -0.317772 | 0.002269 |
| cg00713567 | chr8 | Island      | 0.546962467 | 0.229682771 | -0.31728  | 0.042635 |
| cg08894066 | chr8 | North Shore | 0.741981972 | 0.427336627 | -0.314645 | 0.026237 |
| cg12174804 | chr8 | Island      | 0.444180962 | 0.134742696 | -0.309438 | 0.008823 |
| cg05185040 | chr8 | Island      | 0.687819399 | 0.380035087 | -0.307784 | 0.000236 |
| cg03899054 | chr8 | South Shelf | 0.598769303 | 0.293567078 | -0.305202 | 0.014903 |
| cg15006175 | chr8 | Island      | 0.373448868 | 0.06871354  | -0.304735 | 1.86E-05 |
| cg17301223 | chr8 | Island      | 0.382360916 | 0.078413357 | -0.303948 | 0.000245 |
| cg17078116 | chr8 | Island      | 0.365895797 | 0.062612776 | -0.303283 | 3.99E-06 |
| cg07056138 | chr8 | Open Sea    | 0.438421678 | 0.136984527 | -0.301437 | 0.000115 |
| cg17963840 | chr8 | Island      | 0.510892797 | 0.210698726 | -0.300194 | 0.019181 |
| cg14904662 | chr8 | Island      | 0.357931244 | 0.058628057 | -0.299303 | 0.000108 |
| cg03157027 | chr8 | North Shore | 0.430537565 | 0.133627032 | -0.296911 | 0.043163 |
| cg03434509 | chr8 | Island      | 0.378411065 | 0.086746796 | -0.291664 | 3.55E-06 |
| cg10423052 | chr8 | South Shore | 0.365621007 | 0.074491813 | -0.291129 | 9.76E-05 |
| cg06319475 | chr8 | Island      | 0.387115748 | 0.097143867 | -0.289972 | 5.55E-05 |
| cg08296385 | chr8 | North Shore | 0.458837494 | 0.169420131 | -0.289417 | 0.042318 |
| cg08002746 | chr8 | Open Sea    | 0.75264352  | 0.465744105 | -0.286899 | 0.010515 |
| cg27258399 | chr8 | Island      | 0.557215764 | 0.272310109 | -0.284906 | 0.022202 |
| cg17698295 | chr8 | Island      | 0.373672992 | 0.090134484 | -0.283539 | 0.006801 |
| cg22352078 | chr8 | Island      | 0.341618137 | 0.060135536 | -0.281483 | 7.86E-06 |
| cg09015433 | chr8 | Island      | 0.511195995 | 0.239339125 | -0.271857 | 0.030741 |
| cg18168101 | chr8 | South Shore | 0.337550556 | 0.066254405 | -0.271296 | 4E-05    |
| cg25223771 | chr8 | Island      | 0.324951093 | 0.056256628 | -0.268694 | 2.47E-05 |
| cg26199906 | chr8 | Island      | 0.408658134 | 0.141055798 | -0.267602 | 0.006575 |
| cg24390932 | chr8 | Open Sea    | 0.82133144  | 0.559261596 | -0.26207  | 0.012275 |
| cg26288502 | chr8 | Open Sea    | 0.322737506 | 0.061683719 | -0.261054 | 0.001429 |
| cg07645844 | chr8 | Island      | 0.479379675 | 0.220075596 | -0.259304 | 0.001938 |
| cg10870165 | chr8 | Open Sea    | 0.529473794 | 0.271401634 | -0.258072 | 0.022781 |
| cg22283653 | chr8 | South Shore | 0.322031168 | 0.065483603 | -0.256548 | 0.00121  |
| cg08915632 | chr8 | North Shelf | 0.631782257 | 0.378404132 | -0.253378 | 0.019103 |
| cg23008606 | chr8 | Island      | 0.350593814 | 0.097230358 | -0.253363 | 0.000995 |
| cg05062087 | chr8 | Island      | 0.421871952 | 0.168726049 | -0.253146 | 4.27E-05 |
| cg11548083 | chr8 | Open Sea    | 0.43608758  | 0.183338731 | -0.252749 | 0.026735 |
| cg23820828 | chr8 | North Shore | 0.515018208 | 0.262841457 | -0.252177 | 0.001532 |
| cg04366687 | chr8 | Island      | 0.405986771 | 0.154349012 | -0.251638 | 0.000392 |
| cg26947626 | chr8 | Island      | 0.309814605 | 0.060123246 | -0.249691 | 9.99E-05 |
| cg14332120 | chr8 | North Shore | 0.822468397 | 0.576149215 | -0.246319 | 0.006191 |
| cg01656244 | chr8 | North Shore | 0.356122008 | 0.112125035 | -0.243997 | 0.001038 |
| cg03074188 | chr8 | North Shore | 0.593923565 | 0.35004606  | -0.243878 | 5.35E-05 |
| cg03924566 | chr8 | Island      | 0.312401117 | 0.06903776  | -0.243363 | 4.21E-05 |
| cg09050331 | chr8 | South Shore | 0.46462825  | 0.221667171 | -0.242961 | 0.008577 |
| cg23696886 | chr8 | South Shore | 0.360276197 | 0.117384947 | -0.242891 | 0.04023  |

|            |      |             |             |             |           |          |
|------------|------|-------------|-------------|-------------|-----------|----------|
| cg02574175 | chr8 | Open Sea    | 0.335113408 | 0.093111988 | -0.242001 | 0.045404 |
| cg21289397 | chr8 | Island      | 0.329648569 | 0.08890641  | -0.240742 | 0.000229 |
| cg02161761 | chr8 | South Shore | 0.521586619 | 0.281084474 | -0.240502 | 0.041475 |
| cg12149911 | chr8 | South Shore | 0.330399667 | 0.090506215 | -0.239893 | 3.23E-05 |
| cg20610654 | chr8 | North Shelf | 0.727464434 | 0.488664849 | -0.2388   | 0.012084 |
| cg25307332 | chr8 | Open Sea    | 0.302061582 | 0.06546368  | -0.236598 | 0.0004   |
| cg24641352 | chr8 | North Shore | 0.55917899  | 0.322977443 | -0.236202 | 4.68E-05 |
| cg25457832 | chr8 | North Shore | 0.411600415 | 0.176747251 | -0.234853 | 0.011057 |
| cg02787980 | chr8 | Open Sea    | 0.636588325 | 0.402279019 | -0.234309 | 0.000972 |
| cg07263235 | chr8 | North Shore | 0.352015962 | 0.119536994 | -0.232479 | 0.016379 |
| cg01887995 | chr8 | Island      | 0.332921664 | 0.10132498  | -0.231597 | 0.02595  |
| cg26394257 | chr8 | North Shore | 0.310472585 | 0.080814362 | -0.229658 | 0.00091  |
| cg03025830 | chr8 | Island      | 0.801665219 | 0.572283932 | -0.229381 | 4.98E-08 |
| cg20541191 | chr8 | Open Sea    | 0.304352897 | 0.075757772 | -0.228595 | 0.000875 |
| cg21762788 | chr8 | Island      | 0.30590297  | 0.07920993  | -0.226693 | 0.019811 |
| cg17375585 | chr8 | Open Sea    | 0.313496054 | 0.087267595 | -0.226228 | 0.014836 |
| cg25258843 | chr8 | Island      | 0.384820407 | 0.159228428 | -0.225592 | 0.004025 |
| cg16998223 | chr8 | Open Sea    | 0.392143253 | 0.166987473 | -0.225156 | 0.018089 |
| cg14486338 | chr8 | Island      | 0.282136373 | 0.059209079 | -0.222927 | 0.000171 |
| cg12877723 | chr8 | Island      | 0.277186758 | 0.055221929 | -0.221965 | 0.000248 |
| cg08003628 | chr8 | South Shore | 0.338907918 | 0.117265758 | -0.221642 | 0.025174 |
| cg17943279 | chr8 | Island      | 0.416038399 | 0.195110965 | -0.220927 | 0.0003   |
| cg02315271 | chr8 | South Shore | 0.284745894 | 0.06466521  | -0.220081 | 0.002134 |
| cg04118306 | chr8 | Island      | 0.258766462 | 0.038763143 | -0.220003 | 0.000178 |
| cg14627709 | chr8 | Open Sea    | 0.64904499  | 0.429811573 | -0.219233 | 0.000465 |
| cg07205791 | chr8 | North Shore | 0.885130894 | 0.665961442 | -0.219169 | 9.37E-05 |
| cg14663451 | chr8 | Open Sea    | 0.485918116 | 0.267149293 | -0.218769 | 0.000467 |
| cg11947187 | chr8 | Open Sea    | 0.498877075 | 0.280167599 | -0.218709 | 0.02841  |
| cg14695492 | chr8 | Island      | 0.382292703 | 0.164003669 | -0.218289 | 3.62E-05 |
| cg20309121 | chr8 | Island      | 0.279981577 | 0.062584137 | -0.217397 | 0.001744 |
| cg16473915 | chr8 | Island      | 0.391804991 | 0.17479677  | -0.217008 | 9.31E-05 |
| cg26471398 | chr8 | Open Sea    | 0.783032772 | 0.566381782 | -0.216651 | 0.00018  |
| cg01460430 | chr8 | Open Sea    | 0.496364107 | 0.279872614 | -0.216491 | 0.000216 |
| cg06242449 | chr8 | North Shore | 0.544665255 | 0.328312496 | -0.216353 | 0.000492 |
| cg23831143 | chr8 | Island      | 0.259049685 | 0.04404941  | -0.215    | 0.000112 |
| cg27616227 | chr8 | Open Sea    | 0.348552529 | 0.135035811 | -0.213517 | 0.000207 |
| cg12166610 | chr8 | Island      | 0.295573325 | 0.08210701  | -0.213466 | 4.4E-05  |
| cg14153637 | chr8 | South Shore | 0.389800789 | 0.17757115  | -0.21223  | 0.005387 |
| cg10930667 | chr8 | Open Sea    | 0.728179298 | 0.516567983 | -0.211611 | 0.000889 |
| cg08827307 | chr8 | Island      | 0.263665378 | 0.052205864 | -0.21146  | 0.001369 |
| cg17649385 | chr8 | South Shore | 0.2773122   | 0.066395248 | -0.210917 | 0.000551 |
| cg12133754 | chr8 | Open Sea    | 0.253576061 | 0.043006931 | -0.210569 | 0.000159 |
| cg16799111 | chr8 | Island      | 0.309454103 | 0.101591395 | -0.207863 | 0.037622 |
| cg03074026 | chr8 | North Shore | 0.278148907 | 0.070763081 | -0.207386 | 0.000708 |
| cg20938454 | chr8 | Island      | 0.299088106 | 0.092169063 | -0.206919 | 0.000647 |
| cg08072539 | chr8 | South Shore | 0.787337935 | 0.580504357 | -0.206834 | 0.037598 |
| cg17808631 | chr8 | South Shore | 0.713893379 | 0.50735503  | -0.206538 | 0.000197 |
| cg03079395 | chr8 | North Shore | 0.301412862 | 0.096827749 | -0.204585 | 0.002992 |
| cg26966828 | chr8 | Open Sea    | 0.342418503 | 0.139157181 | -0.203261 | 0.000286 |
| cg02416510 | chr8 | North Shore | 0.317161413 | 0.114859023 | -0.202302 | 0.000156 |

|            |      |             |             |             |           |          |
|------------|------|-------------|-------------|-------------|-----------|----------|
| cg20916578 | chr8 | South Shore | 0.540361302 | 0.338106545 | -0.202255 | 0.033319 |
| cg22453529 | chr8 | Island      | 0.696192663 | 0.49443911  | -0.201754 | 0.02141  |
| cg23954787 | chr8 | South Shore | 0.270683231 | 0.069885743 | -0.200797 | 0.000641 |
| cg12376422 | chr9 | Island      | 0.650976827 | 0.207722175 | -0.443255 | 0.041086 |
| cg07084627 | chr9 | Island      | 0.640197141 | 0.235980061 | -0.404217 | 6.21E-07 |
| cg14081465 | chr9 | Open Sea    | 0.472323311 | 0.068851767 | -0.403472 | 4.71E-09 |
| cg21234471 | chr9 | Open Sea    | 0.424456796 | 0.031469292 | -0.392988 | 3.41E-09 |
| cg13683534 | chr9 | Open Sea    | 0.521784059 | 0.133486206 | -0.388298 | 0.034016 |
| cg14611152 | chr9 | South Shore | 0.454373516 | 0.084961668 | -0.369412 | 4.15E-07 |
| cg05146756 | chr9 | North Shore | 0.506713702 | 0.141317969 | -0.365396 | 0.001186 |
| cg00107630 | chr9 | North Shore | 0.475928794 | 0.116050107 | -0.359879 | 3.22E-08 |
| cg14270434 | chr9 | North Shore | 0.482457818 | 0.142462165 | -0.339996 | 0.001723 |
| cg14164080 | chr9 | Open Sea    | 0.459735914 | 0.121290682 | -0.338445 | 0.000565 |
| cg13784312 | chr9 | Open Sea    | 0.442167875 | 0.120385895 | -0.321782 | 0.000198 |
| cg17355191 | chr9 | Island      | 0.417999391 | 0.109882685 | -0.308117 | 0.002657 |
| cg14425564 | chr9 | Open Sea    | 0.43132627  | 0.134932244 | -0.296394 | 0.014469 |
| cg00049440 | chr9 | North Shore | 0.353415147 | 0.060230568 | -0.293185 | 2.99E-05 |
| cg13687497 | chr9 | North Shelf | 0.705927409 | 0.416499998 | -0.289427 | 0.015925 |
| cg02516189 | chr9 | South Shelf | 0.429726592 | 0.145538647 | -0.284188 | 0.0028   |
| cg07950002 | chr9 | Island      | 0.36179063  | 0.079308847 | -0.282482 | 8.01E-05 |
| cg13444518 | chr9 | South Shore | 0.329868644 | 0.053586964 | -0.276282 | 2.81E-05 |
| cg13390867 | chr9 | Open Sea    | 0.371640605 | 0.102935614 | -0.268705 | 0.000402 |
| cg13487983 | chr9 | North Shelf | 0.448530801 | 0.180460867 | -0.26807  | 7.27E-08 |
| cg16872071 | chr9 | South Shore | 0.633175662 | 0.36930511  | -0.263871 | 0.006722 |
| cg13696609 | chr9 | South Shore | 0.421456578 | 0.158825134 | -0.262631 | 0.047808 |
| cg23395310 | chr9 | Island      | 0.429247727 | 0.166638823 | -0.262609 | 0.045183 |
| cg13622450 | chr9 | North Shelf | 0.481271131 | 0.220636639 | -0.260634 | 0.045169 |
| cg03085321 | chr9 | North Shore | 0.749534531 | 0.49512708  | -0.254407 | 0.007633 |
| cg13971484 | chr9 | South Shelf | 0.499314673 | 0.246356693 | -0.252958 | 3.93E-05 |
| cg13660174 | chr9 | North Shelf | 0.535956666 | 0.283204429 | -0.252752 | 0.029193 |
| cg10129025 | chr9 | Island      | 0.466028807 | 0.214195822 | -0.251833 | 0.015073 |
| cg00767010 | chr9 | Island      | 0.363617647 | 0.112771236 | -0.250846 | 0.00231  |
| cg13718827 | chr9 | North Shelf | 0.790228183 | 0.542160638 | -0.248068 | 0.022651 |
| cg01327147 | chr9 | Island      | 0.770449482 | 0.522844291 | -0.247605 | 0.000413 |
| cg14384158 | chr9 | North Shore | 0.365277428 | 0.120599963 | -0.244677 | 0.001386 |
| cg20083676 | chr9 | Island      | 0.448177102 | 0.208577582 | -0.2396   | 0.016257 |
| cg05001389 | chr9 | Open Sea    | 0.415950985 | 0.179927595 | -0.236023 | 3.95E-06 |
| cg10836809 | chr9 | South Shore | 0.297925329 | 0.064657081 | -0.233268 | 0.000237 |
| cg13583162 | chr9 | North Shelf | 0.690738742 | 0.459872584 | -0.230866 | 0.023966 |
| cg13587564 | chr9 | South Shore | 0.858752973 | 0.632053328 | -0.2267   | 1.56E-05 |
| cg00115654 | chr9 | Island      | 0.400716989 | 0.174461903 | -0.226255 | 4.73E-06 |
| cg14600824 | chr9 | Island      | 0.276351786 | 0.058949086 | -0.217403 | 0.000312 |
| cg14641472 | chr9 | North Shore | 0.316289151 | 0.100701825 | -0.215587 | 0.001161 |
| cg14186336 | chr9 | Open Sea    | 0.71655481  | 0.501556043 | -0.214999 | 3.44E-05 |
| cg13946341 | chr9 | Open Sea    | 0.315121258 | 0.104844882 | -0.210276 | 0.004153 |
| cg25400746 | chr9 | Island      | 0.290063995 | 0.079884508 | -0.210179 | 0.003514 |
| cg14218621 | chr9 | Open Sea    | 0.764049626 | 0.554501814 | -0.209548 | 0.007974 |
| cg14338345 | chr9 | Island      | 0.299396024 | 0.089877925 | -0.209518 | 0.000561 |
| cg22791453 | chr9 | Island      | 0.251771782 | 0.04364207  | -0.20813  | 5.13E-05 |
| cg14481454 | chr9 | Open Sea    | 0.259476051 | 0.054281171 | -0.205195 | 0.001954 |

|            |      |             |             |             |           |          |
|------------|------|-------------|-------------|-------------|-----------|----------|
| cg13914004 | chr9 | North Shore | 0.26969245  | 0.066462975 | -0.203229 | 0.00778  |
| cg03337093 | chr9 | North Shore | 0.369797281 | 0.167875357 | -0.201922 | 0.011039 |
| cg04007303 | chr9 | North Shore | 0.398375923 | 0.197949    | -0.200427 | 0.002014 |
