# Supplementary material
Source: PubMed Central journal article supplement (PMC4622541)
Supplement: kepi-10-03-1006497-s007.pdf [file kepi-10-03-1006497-s007.pdf]

(A) Network 1

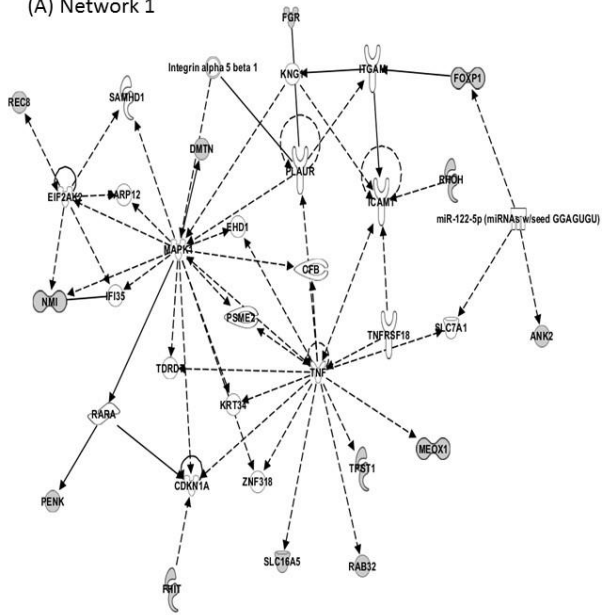

(B) Network 2

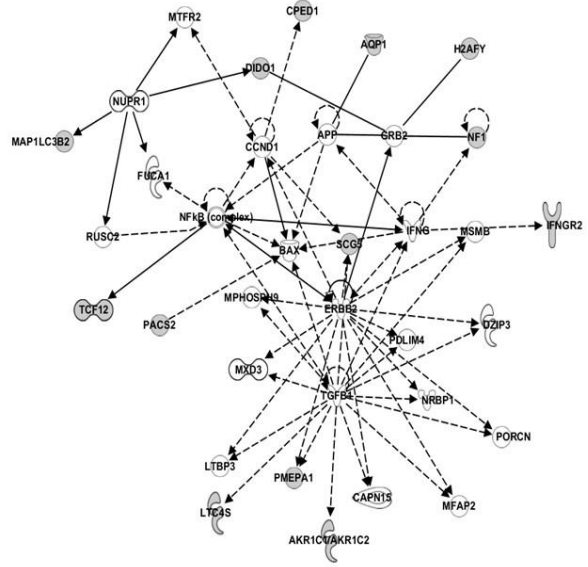

(C) Network 3

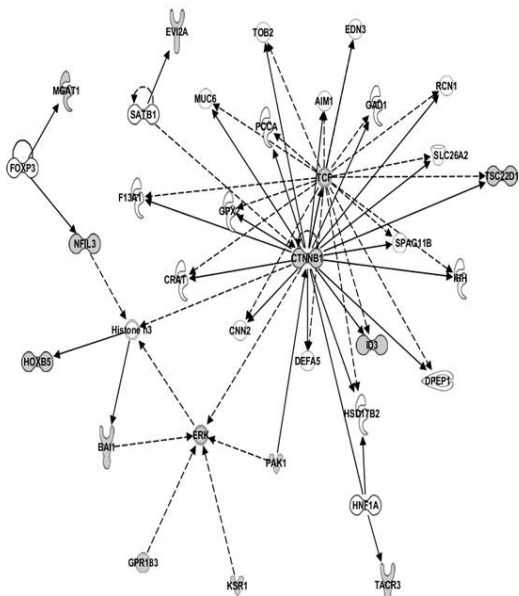

(D) Network 4

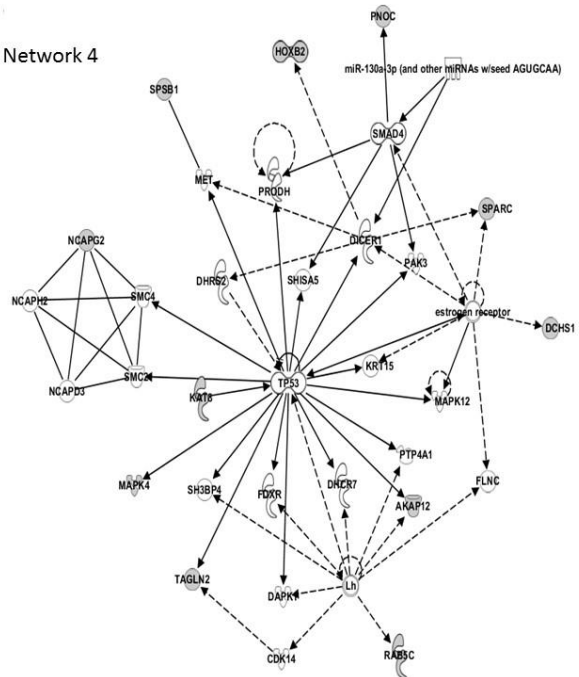

| Legend |                                   |
|--------|-----------------------------------|
|        | Cytokine/ Growth Factor           |
|        | Enzyme                            |
|        | Kinase                            |
|        | Peptidase                         |
|        | Phosphatase                       |
|        | G-Protein coupled receptor        |
|        | Ion Channel                       |
|        | Transporter                       |
|        | Ligand-dependent Nuclear Receptor |
|        | Transcription regulator           |
|        | Translation regulator             |
|        | Complex/ Group                    |
|        | Other                             |
